# Supplementary material for: PAPE (Prefractionation-Assisted Phosphoprotein Enrichment): A Novel Approach for Phosphoproteomic Analysis of Green Tissues from Plants
Source: Proteomes. 2013 Dec 5;1(3):254–74. doi: 10.3390/proteomes1030254 (PMC5302697; doi:10.3390/proteomes1030254)
Supplement: Supplementary File 1 [file proteomes-01-00254-s001.xls]

## Sheet: Samples Report of PAPE
Table S1:	All proteins identified in this study (based on Scaffold version 3.6.5 software with the following parameters: Protein identification threshold=99%; Min.# of peptides used in identification=2; Min peptide threshold = 90%)
			Quantitative Value (Normalized total spectra)
				crude extract			40% AS			MOAC			PAPE
Accession Number	Description	Mol. Wt. [kDa]	repli. 1	repli. 2	repli. 3	repli. 1	repli. 2	repli. 3	repli. 1	repli. 2	repli. 3	repli. 1	repli. 2	repli. 3
AT2G39730.1	RCA - rubisco activase	52	950.9	850.71	878.07	2039.4	2140.3	2095.3	473.01	770.13	673.27	2193	2071.3	1549.7
ATCG00490.1	RBCL - ribulose-bisphosphate carboxylases	53	1541.4	1342.1	1200.2	487.53	480.96	449.4	2392.9	1521.3	1198.3	1038.2	1016.8	978.08
AT5G52310.1	COR78, LTI78, RD29A, LTI140 - low-temperature-responsive protein 78 (LTI78) / desiccation-responsive protein 29A (RD29A)	78	117.19	126.04	102.77	543.64	637.16	600.35	640.69	560.29	1238.6	1573.6	2569.3	1527.4
ATCG00480.1	ATPB, PB - ATP synthase subunit beta	54	319.57	326.26	248.98	892.37	915.58	841.04	347.58	367.71	444.41	926.6	613.86	614.6
AT5G09660.1 (+1)	PMDH2 - peroxisomal NAD-malate dehydrogenase 2	37	383.11	366.21	352.42	695.52	754.35	774.24	213.46	486.79	423.62	762.99	685.24	598.94
AT5G40450.1	unknown protein	323	0	0	0	654.6	669	661.59	55.845	0	114.98	1301.3	1896.2	1306.5
AT3G14210.1	ESM1 - epithiospecifier modifier 1	44	201.81	194.87	172.87	687.93	814.91	787.37	240.36	287.91	249.31	740.06	679.27	670.42
AT4G20360.1	ATRAB8D, ATRABE1B, RABE1b - RAB GTPase homolog E1B	52	263.59	277.54	269.88	536.71	474.83	455.28	312.46	316.15	274.63	712.78	495.81	710.17
AT3G01500.1	CA1, ATBCA1, SABP3, ATSABP3 - carbonic anhydrase 1	30	315.15	296.96	317.58	310.79	278.96	257.43	406.17	480.21	548.63	496.08	535.9	576.97
AT1G06680.1	PSBP-1, OEE2, PSII-P, OE23 - photosystem II subunit P-1	28	800.83	836.29	848.93	176.05	199.85	206.11	143.88	317.3	418.61	110.35	112.91	88.764
AT1G55490.1 (+1)	CPN60B, LEN1 - chaperonin 60 beta	64	506.18	503.82	504.74	216.96	234.13	244.93	314.32	437.84	394.37	331.19	398.27	374.11
AT2G28000.1	CPN60A, CH-CPN60A, SLP - chaperonin-60alpha	62	209.36	235.99	203.23	533.9	486.37	443.72	423.95	225.79	255.9	433.68	427.27	401.91
AT3G60750.1	Transketolase	80	466.67	402.8	339.26	82.732	65.079	70.508	773.79	582.72	635.24	207.78	206.49	240.77
AT5G50920.1	CLPC, ATHSP93-V, HSP93-V, DCA1, CLPC1 - CLPC homologue 1	103	184.1	210.34	173.5	358.6	392.62	372.16	375.87	335.28	296.48	493.11	606.38	588.93
AT4G38970.1	FBA2 - fructose-bisphosphate aldolase 2	43	387.2	398.57	305.93	221.97	214.65	213.1	364.51	392.8	538.46	402.21	409.94	402.07
ATCG00120.1	ATPA - ATP synthase subunit alpha	55	71.968	76.574	88.057	458.68	530.89	424.78	160.07	175.3	126.39	730.6	666.66	868.38
AT4G29060.1	emb2726 - elongation factor Ts family protein	104	284.52	347.75	293.16	336.08	386.65	360.59	302.42	306.51	381.16	332.96	304.47	182.91
AT4G37930.1	SHM1, STM, SHMT1 - serine transhydroxymethyltransferase 1	57	733.47	722.84	709.57	44.879	42.43	48.863	262.28	499.61	225.49	6.1898	0	0
AT1G67090.1	RBCS1A - ribulose bisphosphate carboxylase small chain 1A	20	417.35	400.55	421.83	96.545	112.63	103.07	318.79	634.17	733.4	72.367	92.864	163.02
AT5G04140.1 (+1)	GLU1, GLS1, GLUS, FD-GOGAT - glutamate synthase 1	177	498.36	465.64	333.56	43.096	33.695	36.218	724.9	526.59	433.19	52.245	50.356	51.786
AT1G20620.1	CAT3, SEN2, ATCAT3 - catalase 3	57	163.24	149.03	148.79	439.86	317.58	317.05	179.21	177.55	140.31	578.24	604.33	546.22
AT1G11860.1 (+2)	Glycine cleavage T-protein family	44	657.45	642.69	719.65	45.244	41.388	28.906	228.4	485.34	323.06	12.036	12.562	0
AT3G12780.1	PGK1 - phosphoglycerate kinase 1	50	426.11	370.16	353.72	106.43	80.965	91.349	521.76	376.56	355.59	109.4	91.119	102.49
AT1G42970.1	GAPB - glyceraldehyde-3-phosphate dehydrogenase B subunit	48	396.92	389.05	338.64	139.38	145.86	149.3	286.55	489.7	359.48	121.23	127.35	141.82
AT1G32060.1	PRK - phosphoribulokinase	44	163.9	156.71	114.96	399.05	349.25	308.99	263.23	156.21	202.01	346.22	346.07	429.42
AT5G02500.1	HSC70-1, HSP70-1, AT-HSC70-1, HSC70 - heat shock cognate protein 70-1	71	142.67	146.97	103.65	305.03	341.9	293.65	410.71	183.6	232.91	319.58	183.4	251.56
AT4G33010.1	AtGLDP1, GLDP1 - glycine decarboxylase P-protein 1	113	512.11	524.82	330.93	46.746	37.133	20.726	444.8	482.13	264.08	28.019	3.812	3.6496
AT1G07920.1 (+5)	GTP binding Elongation factor Tu family protein	50	218.65	251.63	219.99	168.45	208.41	196.03	181.59	648.48	320.78	197.74	221.73	163.02
AT3G14420.1 (+1)	Aldolase-type TIM barrel family protein	40	202.21	249.43	176.41	334.77	281.56	256.94	276	257.54	178.33	233.52	189.75	230.17
AT2G27710.1 (+2)	60S acidic ribosomal protein family	11	140.22	109.28	116.04	137.49	154.61	123.07	517.89	352.63	681.24	327.84	453.98	460.03
AT1G56070.1	LOS1 - Ribosomal protein S5/Elongation factor G/III/V family protein	94	321.39	343.51	306.88	104.44	75.564	79.545	442.26	349.9	262.29	115.23	75.571	123.95
AT4G21280.1	PSBQ, PSBQA, PSBQ-1 - photosystem II subunit QA	24	488.93	429.96	464.58	147.63	141.79	155.51	85.515	171.55	277.87	47.151	41.124	19.223
AT4G24280.1	cpHsc70-1 - chloroplast heat shock protein 70-1	77	268.72	226.38	222.76	326.79	383.28	374.25	156.79	119.31	222.53	61.293	40.768	33.465
AT3G26650.1	GAPA, GAPA-1 - glyceraldehyde 3-phosphate dehydrogenase A subunit	42	393.45	363.39	394.9	105.2	131.34	103.1	362.49	490.89	279.26	112.21	98.187	138.85
AT5G35630.1 (+2)	GS2, GLN2, ATGSL1 - glutamine synthetase 2	47	196.83	218.24	161.13	160.48	174.77	151.92	337.25	242	225.99	192.67	177.18	133.07
AT5G66570.1	PSBO-1, OEE1, OEE33, OE33, PSBO1, MSP-1 - PS II oxygen-evolving complex 1	35	343.42	354.34	384.11	155.8	169.31	184.61	94.497	194.65	316.05	39.141	85.313	0
AT5G14740.2 (+1)	CA2, CA18, BETA CA2 - carbonic anhydrase 2	28	395.76	350.68	392.85	341.21	302.05	285.49	420.86	563.32	584.88	532.58	597.5	602.87
AT4G35090.1	CAT2 - catalase 2	57	270.18	251.04	257.9	446.71	406.02	323.25	197.26	247.93	195.15	391.12	471.11	432.93
AT5G17920.1 (+1)	ATCIMS, ATMETS, ATMS1 - Cobalamin-independent synthase family protein	84	318.2	314.51	232.97	45.929	21.779	27.167	423.4	346.91	327.46	47.265	60.54	90.989
AT2G27720.1	60S acidic ribosomal protein family	11	96.62	75.823	82.763	108.64	115.78	109.24	324.31	250.69	393.24	264.96	368.39	345.22
AT2G38040.1 (+1)	CAC3 - acetyl Co-enzyme a carboxylase carboxyltransferase alpha subunit	85	36.551	36.129	38.106	247.2	221.79	226.8	291.08	105.21	171.81	364.96	349.53	384.86
AT1G60950.1	FED A, ATFD2 - 2Fe-2S ferredoxin-like superfamily protein	16	0	0	0	0	0	0	1493.8	0	10.815	0	0	0
AT4G13940.1	HOG1, EMB1395, SAHH1, MEE58, ATSAHH1 - S-adenosyl-L-homocysteine hydrolase	53	119.61	125.93	120.52	197.03	184.32	130.01	257.71	271.46	173.36	287.1	223.54	301.93
AT1G48030.1 (+1)	mtLPD1 - mitochondrial lipoamide dehydrogenase 1	54	421.14	436.98	468.81	13.841	33.931	17.055	158.66	417.99	222.37	0	0	0
AT1G04410.1	Lactate/malate dehydrogenase family protein	36	398.28	427.57	398.47	41.732	33.11	36.18	123.79	310.56	326.35	28.135	25.195	38.155
AT3G52930.1	Aldolase superfamily protein	39	391.87	391.98	415.43	31.694	12.188	39.728	140.95	361.79	340.7	17.066	0	0
AT1G07320.1 (+3)	RPL4 - ribosomal protein L4	31	23.736	30.81	45.388	68.154	82.541	100.42	190.19	245.27	246.54	353.42	564.42	592.94
AT5G01410.1	PDX1, ATPDX1.3, RSR4, PDX1.3, ATPDX1 - Aldolase-type TIM barrel family protein	33	145.28	160.87	157.26	266.72	307.7	297.61	68.338	101.87	63.946	261.21	159.62	156.21
AT5G08670.1 (+1)	ATP synthase alpha/beta family protein	60	138.14	120.43	81.807	365.23	288.35	294.15	100.03	104.69	63.505	282.69	173.76	228.55
AT5G38410.1 (+1)	Ribulose bisphosphate carboxylase (small chain) family protein	20	376.06	402.49	400.93	115.81	119.28	100.32	291.23	619.36	677.29	80.339	75.586	154.85
AT1G09340.1	CRB, CSP41B, HIP1.3 - chloroplast RNA binding	43	321.91	350.66	278.55	24.141	10.138	17.155	229.43	330.91	233.08	40.196	83.534	64.601
AT4G22670.1	AtHip1, HIP1, TPR11 - HSP70-interacting protein 1	47	0	0	0	75.969	80.268	86.707	47.524	7.4777	133.64	541.98	911.9	621.69
AT4G27440.1 (+1)	PORB - protochlorophyllide oxidoreductase B	43	163.52	174.59	201.47	193.57	200.86	171.58	35.01	203.88	104.21	222.7	152.41	164.01
AT1G23310.1	GGT1, AOAT1, GGAT1 - glutamate:glyoxylate aminotransferase	53	249.88	263.53	250.86	67.37	47.735	42.491	235.84	281.15	225.66	62.343	68.956	61.202
AT3G18780.2	ACT2, DER1, LSR2, ENL2 - actin 2	42	27.653	25.647	22.475	271.96	226.73	246.61	94.333	32.965	69.528	442.29	301.67	287.26
AT1G53240.1	mMDH1 - Lactate/malate dehydrogenase family protein	36	373.17	361.35	385.77	41.627	61.966	51.548	130.75	306.81	266.18	0	0	0
AT5G42020.1	BIP, BIP2 - Heat shock protein 70 (Hsp 70) family protein	74	114	130.46	134.75	139.22	123.11	139.2	321.44	196.39	256.54	171.74	178.08	215.95
AT1G78900.1 (+1)	VHA-A - vacuolar ATP synthase subunit A	69	0	17.638	0	331.74	236.52	229.54	106.86	0	0	283.92	363.88	471.69
AT5G20720.1 (+2)	CPN20, CPN10, CHCPN10, ATCPN21, CPN21 - chaperonin 20	27	319.33	283.88	280.55	134.33	171.79	160.93	40.679	150.78	201.11	2.1137	0	0
AT5G46290.1	KASI, KAS1 - 3-ketoacyl-acyl carrier protein synthase I	50	197.54	189.1	230.53	135.41	140.9	125.58	69.047	164.88	82.193	189.51	177.39	169.46
AT3G44310.1 (+1)	NIT1, ATNIT1, NITI - nitrilase 1	38	66.808	38.799	44.657	240.55	268.12	237.58	95.233	93.688	23.931	248.02	259.17	302.33
AT4G05180.1	PSBQ, PSBQ-2, PSII-Q - photosystem II subunit Q-2	25	311.6	318.1	332.68	95.913	77.707	102.19	33.627	164.91	231.07	60.434	113.53	69.928
AT3G08530.1	Clathrin, heavy chain	193	0	0	0	183.05	135.29	129.18	85.243	0	0	413.61	475.12	720.69
AT1G76030.1	ATPase, V1 complex, subunit B protein	54	16.2	34.369	4.562	276.49	245.58	215.98	110.23	34.794	51.361	273.61	185.89	318.75
AT5G08280.1	HEMC - hydroxymethylbilane synthase	41	313.33	298.27	333.25	0	0	0	165.18	223.22	145.57	38.057	17.369	20.05
AT3G63140.1	CSP41A - chloroplast stem-loop binding protein of 41 kDa	44	314.86	309.78	372.83	0	0	0	117.18	315.5	159.89	0	0	0
AT3G08580.1 (+1)	AAC1 - ADP/ATP carrier 1	41	57.872	69.439	67.571	171.35	214.23	191.15	76.677	137.26	93.705	240.55	258.35	210.63
AT2G36530.1	LOS2, ENO2 - Enolase	48	375.73	375.26	332.01	12.869	0	7.2488	170.74	133.07	97.018	0	0	0
AT4G16155.1	dihydrolipoyl dehydrogenases	67	187.64	170.47	197.14	189.88	187.03	174.28	68.324	248.08	104.22	11.877	0	0
AT1G68010.1 (+1)	HPR, ATHPR1 - hydroxypyruvate reductase	42	220.77	197.97	200.72	33.896	36.245	37.068	232.86	226.76	218.53	52.388	27.043	44.973
AT1G29670.1	GDSL-like Lipase/Acylhydrolase superfamily protein	40	110.06	123.36	78.996	238.01	250.91	246.7	48.831	149.11	91.875	116.35	55.96	70.616
AT2G21330.1	FBA1 - fructose-bisphosphate aldolase 1	43	290.68	310.56	196.98	180.15	149.31	143.31	287.01	272.17	369.18	263.47	252.89	253.79
AT3G62030.1 (+1)	ROC4 - rotamase CYP 4	28	365.2	303.27	276.29	25.087	24.833	22.537	97.988	223.97	136.99	1.9651	0	0
AT1G62750.1	ATSCO1, ATSCO1/CPEF-G, SCO1 - Translation elongation factor EFG/EF2 protein	86	187.52	178.79	146.56	63.306	30.899	40.7	319.48	204.58	180.21	48.171	25.215	12.027
AT1G13440.1	GAPC-2, GAPC2 - glyceraldehyde-3-phosphate dehydrogenase C2	37	207.51	165.27	156.41	60.51	42.326	31.638	212.11	280.42	176.28	54.005	41.656	43.459
AT5G26000.1 (+1)	TGG1, BGLU38 - thioglucoside glucohydrolase 1	61	165.73	141.94	83.655	14.806	24.833	39.779	280.29	251	475.1	0	0	0
AT1G34430.1	EMB3003 - 2-oxoacid dehydrogenases acyltransferase family protein	48	11.44	29.069	1.7606	296.78	347.99	310.62	68.511	58.627	45.343	138.4	116.85	96.33
AT3G09200.1	Ribosomal protein L10 family protein	34	0	10.593	0	110.61	107.15	137.35	216.66	76.294	89.675	210.65	352.06	362.14
AT4G14960.2 (+2)	TUA6 - Tubulin/FtsZ family protein	50	0	0	0	115.7	124	102.2	72.78	0	0	381.52	519.49	474.36
AT1G23740.1	Oxidoreductase, zinc-binding dehydrogenase family protein	41	274.57	266.13	299.07	0	0	0	92.073	234.73	290.92	0	0	0
AT3G25860.1	LTA2, PLE2 - 2-oxoacid dehydrogenases acyltransferase family protein	50	45.203	52.914	46.495	239.84	268.83	239.59	77.63	89.768	114.44	157.03	166.99	153.23
AT1G20450.1 (+1)	LTI29, LTI45, ERD10 - Dehydrin family protein	30	0	16.764	2.8724	44.917	61.059	61.512	182.52	238.22	383.39	172.47	238.68	197.49
AT2G25080.1	ATGPX1, GPX1 - glutathione peroxidase 1	26	225.32	215.18	242.44	61.331	66.221	67.818	66.508	211.02	221.73	0	0	3.2988
AT3G26060.1	ATPRX Q - Thioredoxin superfamily protein	24	278.17	280.13	306.33	50.905	54.737	53.32	59.487	78.658	138.8	21.081	0	32.248
AT3G55410.1	2-oxoglutarate dehydrogenase, E1 component	115	21.184	21.161	0	205.71	163.57	133.89	70.768	0	0	372.08	241.11	338.97
AT2G38230.1	ATPDX1.1, PDX1.1 - pyridoxine biosynthesis 1.1	33	172.63	181.18	224.22	296.36	326.74	294.02	72.623	100.78	97.459	229.34	128.56	88.2
AT2G07698.1	ATPase, F1 complex, alpha subunit protein	86	16.483	25.531	22.296	177.36	164.08	154.43	66.471	78.76	86.393	321.37	245.95	278.19
AT4G26530.1 (+1)	Aldolase superfamily protein	38	242.97	235.4	259.84	43.135	30.084	29.861	126.01	180.23	141.34	43.297	42.862	54.185
AT2G37660.1	NAD(P)-binding Rossmann-fold superfamily protein	35	280.69	279.8	311.34	0	0	0	83.778	117.42	216.07	0	0	0
AT5G52300.1	RD29B, LTI65 - CAP160 protein	66	63.561	58.089	63.206	156.97	215.96	193.65	83.967	75.322	200.86	68.434	122.89	81.983
AT2G33150.1	PKT3, PED1, KAT2 - peroxisomal 3-ketoacyl-CoA thiolase 3	49	198.74	181.32	230.52	54.451	45.874	48.767	62.008	219.13	185.26	33.202	3.812	13.253
AT4G23670.1	Polyketide cyclase/dehydrase and lipid transport superfamily protein	18	278.07	259.12	290.44	10.387	15.943	20.838	65.902	152.12	157.27	0	0	0
AT1G13930.1 (+2)	Involved in response to salt stress. Knockout mutants are hypersensitive to salt stress.	16	280.13	272.98	280.26	80.549	80.477	91.223	26.405	38.052	90.63	0	0	0
AT4G11150.1	TUF, emb2448, TUFF, VHA-E1 - vacuolar ATP synthase subunit E1	26	119.36	122.38	148.41	167.98	175.99	177.15	23.738	67.098	66.81	89.371	81.942	81.739
AT3G54050.1 (+1)	HCEF1 - high cyclic electron flow 1	45	139.81	141.01	123.34	25.825	24.833	22.638	249.2	211.33	229.39	32.147	18.949	27.036
AT3G13930.1	Dihydrolipoamide acetyltransferase, long form protein	58	38.205	35.268	29.729	250.07	286.75	254.2	30.884	64.336	51.452	93.485	105.36	87.039
AT2G13360.1 (+1)	AGT, AGT1, SGAT - alanine:glyoxylate aminotransferase	44	69.291	72.136	58.324	173.64	156.92	120.23	154.73	110.7	103.48	117.39	67.948	64.601
AT1G20440.1	COR47, RD17, AtCOR47 - cold-regulated 47	30	46.361	49.464	53.055	55.599	34.159	46.14	142.34	225.24	336.64	102.43	240.89	234.5
AT5G35360.1	CAC2 - acetyl Co-enzyme a carboxylase biotin carboxylase subunit	58	85.995	71.272	56.46	157.83	178.35	143.59	43.388	61.645	62.258	166.55	162.19	177.14
AT3G47520.1	MDH - malate dehydrogenase	42	126.52	110.17	117.62	171.46	198.64	183.47	69.981	112.6	55.073	37.154	12.633	12.816
AT3G09840.1	CDC48, ATCDC48, CDC48A - cell division cycle 48	89	121.16	113.6	69.78	177.4	166.24	146.59	152.12	47.66	28.745	47.134	82.344	44.711
AT1G55480.1	ZKT - protein containing PDZ domain, a K-box domain, and a TPR region	37	152.85	163.85	196.71	81.215	93.099	94.068	83.228	106.82	173.26	12.074	44.074	32.353
AT1G20340.1	DRT112, PETE2 - Cupredoxin superfamily protein	17	197.39	232.43	225.55	53.353	76.219	49.627	52.862	101.8	167.33	0	0	0
AT5G15450.1	APG6, CLPB3, CLPB-P - casein lytic proteinase B3	109	4.2473	3.3556	0	329.73	245.88	245.03	64.353	22.609	4.4062	156.66	22.656	35.461
AT1G76180.1 (+1)	ERD14 - Dehydrin family protein	21	52.013	70.535	64	46.771	66.221	77.787	120.42	133.29	207.19	176.02	336.07	313.52
AT5G50950.2	FUM2 - FUMARASE 2	54	149.88	161.23	218.35	90.937	102.45	120.23	53.805	120.16	61.162	46.186	8.1506	0
AT3G63490.1	Ribosomal protein L1p/L10e family	38	177.8	187.34	196.26	114.95	141.49	110.34	38.396	115.09	24.068	3.9302	3.262	0
AT3G27925.1	DEGP1, Deg1 - DegP protease 1	47	115.21	107.51	122.71	187.47	206.54	187.22	19.556	66.572	101.95	13.96	0	0
AT4G31700.1	RPS6, RPS6A - ribosomal protein S6	28	141.87	140.19	149.21	129.84	169.3	150.12	1.296	0	0	70.284	128.52	147.92
AT5G65010.1 (+1)	ASN2 - asparagine synthetase 2	65	7.1684	0	18.548	151.96	113.45	113.03	47.578	17.581	0	303.92	295.15	248.01
AT5G39740.1 (+1)	OLI7, RPL5B - ribosomal protein L5 B	34	0	0	0	55.259	76.59	48.812	44.668	48.094	0	252.8	526.18	418.87
AT2G21170.1	TIM, PDTPI - triosephosphate isomerase	33	278.68	232.75	223.86	0	0	0	111.38	173.65	115	0	0	0
AT2G28190.1	CSD2, CZSOD2 - copper/zinc superoxide dismutase 2	22	240.15	201.54	238.63	17.249	13.643	23.509	62.282	95.796	193.64	0	0	0
AT5G38430.1	Ribulose bisphosphate carboxylase (small chain) family protein	20	342.84	359.42	352.79	89.801	0	26.682	273.57	552.49	623.27	83.439	0	96.745
AT4G15545.1	unknown protein	37	23.079	28.223	37.225	73.708	80.847	93.199	107.41	43.699	136.58	151.49	221.36	274.51
AT1G37130.1	NIA2, B29, NIA2-1, CHL3, NR, NR2, ATNR2 - nitrate reductase 2	103	0	0	0	96.908	78.173	82.437	51.789	26.27	37.031	280.52	345.7	322.24
AT4G28080.1	Tetratricopeptide repeat (TPR)-like superfamily protein	199	0	0	0	90.675	118.93	121.13	34.207	25.101	117.24	225.15	331.01	264.68
AT4G20260.1 (+3)	ATPCAP1, PCAP1 - plasma-membrane associated cation-binding protein 1	25	218.74	223.12	214.54	39.027	45.643	51.581	28.645	65.625	140.17	0	16.032	0
AT1G65260.1	PTAC4, VIPP1 - plastid transcriptionally active 4	36	91.631	102.17	99.303	172.66	248.55	235.54	0	0	58.595	0	0	3.6496
AT2G18960.1	AHA1, PMA, OST2, HA1 - H(+)-ATPase 1	104	56.392	35.268	54.801	136.65	144.63	109.47	64.422	96.188	83.934	102.01	117.58	153.87
AT1G20020.1	ATLFNR2, FNR2 - ferredoxin-NADP(+)-oxidoreductase 2	41	135.73	139.25	144.81	31.09	14.758	44.296	107.94	182.38	185.27	8.1576	12.562	20.175
AT5G39570.1	unknown protein	44	0	0	0	54.556	56.829	57.876	53.374	49.221	109.06	208.02	400.74	356.24
AT5G54770.1	THI1, TZ, THI4 - thiazole biosynthetic enzyme, chloroplast (ARA6) (THI1) (THI4)	37	45.483	40.459	40.854	175.3	180.5	157.33	49.325	63.74	42.733	128.52	60.57	83.261
AT2G24270.1 (+3)	ALDH11A3 - aldehyde dehydrogenase 11A3	53	194.75	210.34	183.59	0	2.0848	0	121.72	203.85	76.384	0	0	0
AT3G06650.1	ACLB-1 - ATP-citrate lyase B-1	66	74.564	68.729	59.522	140.63	102.31	116.71	85.983	101.27	33.558	102.46	95.74	95.719
AT1G49760.1 (+1)	PAB8, PABP8 - poly(A) binding protein 8	73	50.722	78.459	100.37	190.92	164.19	168.03	4.1496	35.01	51.313	90.391	77.696	42.494
AT3G53900.1 (+1)	UPP, PYRR - uracil phosphoribosyltransferase	25	87.039	98.987	121.25	180.66	189.48	180.13	0	46.555	0	31.98	0	40.069
AT5G24300.1 (+1)	SSI1, SSI, ATSS1 - Glycogen/starch synthases, ADP-glucose type	72	14.795	14.107	16.679	148.06	124.83	106.7	39.899	42.548	29.987	206.61	173.44	255.94
AT2G16600.1	ROC3 - rotamase CYP 3	18	203.55	193.23	198.85	6.8159	6.4127	0	79.928	144.84	131.56	0	0	0
AT4G14880.1 (+3)	OASA1, OLD3, CYTACS1 - O-acetylserine (thiol) lyase (OAS-TL) isoform A1	34	108.78	118.89	113.04	37.697	49.717	33.402	109.63	229.07	189.6	0	0	0
ATCG00830.1 (+1)	RPL2.1 - ribosomal protein L2	30	147.33	123.53	151.31	116.07	169.66	118.86	6.7283	62.052	0	7.8477	27.741	15.415
AT1G22530.1	PATL2 - PATELLIN 2	76	109.28	97.03	91.866	90.777	91.034	96.687	114.13	130.09	168.88	0	0	0
AT2G36390.1	SBE2.1, BE3 - starch branching enzyme 2.1	98	22.422	30.751	0	123.79	107.32	113.82	37.589	32.652	62.958	204.84	189.95	187.82
AT2G41740.1	VLN2, ATVLN2 - villin 2	108	10.753	12.317	18.613	68.387	44.53	47.027	143.51	130.07	209.69	107.42	146.37	140.92
AT3G52960.1	Thioredoxin superfamily protein	25	142.36	157.67	160.33	39.736	20.81	31.689	61.047	128.41	169.65	31.104	3.8256	2.4331
AT5G66400.2	RAB18, ATDI8 - Dehydrin family protein	18	4.0826	4.3117	7.3258	84.887	80.932	75.557	161.4	116.01	160.47	140.1	47.101	42.149
AT1G01090.1	PDH-E1 ALPHA - pyruvate dehydrogenase E1 alpha	47	36.988	28.214	33.412	138.13	136.65	114.81	50.201	103.35	46.575	129.42	98.438	101.92
AT2G39800.1 (+1)	P5CS1, ATP5CS - delta1-pyrroline-5-carboxylate synthase 1	78	40.573	31.745	0	102.82	102.31	77.773	111.36	54.629	0	153.55	135.13	212.84
AT1G01320.1 (+1)	Tetratricopeptide repeat (TPR)-like superfamily protein	199	0	0	0	111.51	122.01	123.89	32.299	0	34.76	191.87	312.85	290.75
AT3G55440.1	ATCTIMC, TPI, CYTOTPI - triosephosphate isomerase	27	176.16	139.87	126.21	0	0	0	141.42	179.92	93.183	8.0241	0	0
AT1G03630.1 (+1)	POR C, PORC - protochlorophyllide oxidoreductase C	44	84.564	103.2	98.373	125.33	143.86	102.17	8.943	78.403	33.558	123.54	97.011	97.527
AT5G16710.1	DHAR3 - dehydroascorbate reductase 1	29	215.08	203.39	230.27	0	0	0	40.484	75.238	124.38	0	0	0
AT4G11740.1	SAY1 - Ubiquitin-like superfamily protein	62	0	0	0	1.8061	9.0918	1.8345	80.642	0	97.093	239.65	383.33	375.11
AT5G45390.1	CLPP4, NCLPP4 - CLP protease P4	32	0	0	0	171.88	165.25	163.86	45.212	0	0	163.96	150.58	112.86
AT5G19220.1	ADG2, APL1 - ADP glucose pyrophosphorylase large subunit 1	58	115.66	105.81	73.338	13.841	12.069	15.368	139.38	169.18	129.23	36.172	58.336	46.818
AT3G45140.1	LOX2, ATLOX2 - lipoxygenase 2	102	0	0	0	152.7	79.564	63.276	18.181	0	0	235.87	208.7	305.25
AT4G01310.1	Ribosomal L5P family protein	28	128.7	127.55	148.33	118.96	98.032	109.41	16.813	71.729	30.948	0	0	0
AT2G10940.1 (+1)	Bifunctional inhibitor/lipid-transfer protein/seed storage 2S albumin superfamily protein	30	59.38	86.369	84.442	140.98	170.45	100.36	23.118	94.91	28.745	28.122	37.828	36.969
AT5G19820.1	emb2734 - ARM repeat superfamily protein	124	0	0	0	172.93	113.07	117.9	40.003	0	0	213.08	119.27	170.6
AT3G04790.1	Ribose 5-phosphate isomerase, type A protein	29	73.524	94.257	83.531	41.523	50.48	38.863	118.96	133.81	191.49	0	0	0
AT4G33510.1	DHS2 - 3-deoxy-d-arabino-heptulosonate 7-phosphate synthase	56	0	0	0	118.49	109.22	106.63	7.0148	31.877	0	172.54	181.34	193.03
AT2G35490.1	Plastid-lipid associated protein PAP / fibrillin family protein	41	0	0	0	135.11	105.74	126.66	44.044	0	0	170.86	183.85	210.1
AT4G38740.1	ROC1 - rotamase CYP 1	18	172.68	151.01	182.84	0	0	0	53.187	126.02	174.73	0	0	0
AT3G47070.1	unknown protein	11	128.23	121.58	140.27	68.416	84.821	88.596	19.675	48.043	91.094	0	0	0
AT2G23350.1	PAB4, PABP4 - poly(A) binding protein 4	72	29.591	28.205	60.327	110.61	144.97	150.04	20.034	78.607	39.563	55.213	70.123	82.383
AT2G36460.1	Aldolase superfamily protein	38	300.53	290.57	336.35	0	0	0	124.41	311.52	267.94	0	0	0
AT4G34110.1	PAB2, PABP2, ATPAB2 - poly(A) binding protein 2	69	40.423	57.273	80.781	173.54	188.86	202.37	0	32.721	59.653	38.136	14.264	0
AT2G41840.1	Ribosomal protein S5 family protein	31	93.424	86.262	104.99	109.11	150.88	132.11	0	88.512	0	8.0241	0	9.4236
AT1G69740.1 (+1)	HEMB1 - Aldolase superfamily protein	47	61.467	69.651	73.378	74.228	86.237	67.856	98.224	124.83	124.77	0	6.367	0
AT1G32990.1	PRPL11 - plastid ribosomal protein l11	23	112.1	120.75	128.78	72.802	69.212	92.232	25.4	50.946	72.583	24.098	0	12.816
AT5G43940.1	HOT5, ADH2, GSNOR, ATGSNOR1, PAR2 - GroES-like zinc-binding dehydrogenase family protein	41	144.08	163.63	139.84	0	0	0	79.052	187.78	67.77	0	0	0
AT1G12900.1 (+2)	GAPA-2 - glyceraldehyde 3-phosphate dehydrogenase A subunit 2	43	314.42	277.97	318.89	101.79	130.4	103.97	311.42	322.97	230.14	0	0	0
AT2G43750.1 (+1)	OASB, ACS1, CPACS1, ATCS-B - O-acetylserine (thiol) lyase B	42	145.19	112.65	86.193	0	0	0	110.39	212.65	112.25	0	0	0
AT5G66190.1	ATLFNR1, FNR1 - ferredoxin-NADP(+)-oxidoreductase 1	40	31.428	40.653	45.414	95.527	82.825	79.631	88.686	63.338	121.97	45.264	75.673	83.929
AT4G08390.1 (+2)	SAPX - stromal ascorbate peroxidase	40	184.45	186.49	208.58	0	0	0	23.069	61.479	119.82	0	0	0
AT3G24430.1	HCF101 - ATP binding	58	0	0	0	146.93	137.82	132.91	0	0	0	192.49	146.14	125.51
AT2G44060.1 (+1)	Late embryogenesis abundant protein, group 2	36	1.86	2.6878	3.8051	45.781	25.562	28.952	177.5	26.095	46.498	162.02	144.62	167.1
AT1G02560.1	CLPP5, NCLPP5, NCLPP1 - nuclear encoded CLP protease 5	32	0	0	0	127.47	136.81	90.841	46.136	19.421	42.786	145.76	111.5	54.356
AT2G18020.1	EMB2296 - Ribosomal protein L2 family	28	106.06	75.779	88.155	132.17	145.2	117.08	3.3516	33.434	0	0	10.792	7.2347
AT2G15620.1	NIR1, NIR, ATHNIR - nitrite reductase 1	66	180.03	163.05	137.37	0	0	0	112.94	69.867	68.219	0	0	0
AT5G24490.1	30S ribosomal protein, putative	35	56.97	56.482	76.103	9.5709	8.046	0	122.99	43.779	68.436	86.501	152.83	179.45
AT1G50480.1	THFS - 10-formyltetrahydrofolate synthetase	68	170.32	167.38	149.45	0	0	0	61.575	189.49	0	0	0	0
AT3G12290.1	Amino acid dehydrogenase family protein	32	172.18	177.94	185.84	0	0	0	22.298	152.9	57.444	0	0	0
AT3G55800.1	SBPASE - sedoheptulose-bisphosphatase	42	141.88	133.04	82.425	20.761	0	0	187.88	62.14	63.229	0	0	0
AT2G24200.1 (+1)	Cytosol aminopeptidase family protein	55	100.88	89.08	58.569	0	0	0	131.08	213.75	177.18	0	0	0
AT3G17390.1	MTO3, SAMS3, MAT4 - S-adenosylmethionine synthetase family protein	43	140.98	127.79	116.21	46.922	37.999	29.849	99.316	83.815	19.163	0	0	0
AT3G48560.1	CSR1, ALS, AHAS, TZP5, IMR1 - chlorsulfuron/imidazolinone resistant 1	73	18.38	16.694	15.844	112.93	98.182	119.25	18.777	30.63	20.358	145.24	104.71	144.52
AT2G39460.1 (+1)	ATRPL23A, RPL23A, RPL23AA - ribosomal protein L23AA	17	58.459	49.366	65.917	42.613	62.198	72.36	0	0	0	104.17	285.18	188.07
AT2G35370.1	GDCH - glycine decarboxylase complex H	18	160.81	139.73	168.21	10.966	0	0	46.276	60.646	126.35	0	0	0
AT5G09810.1	ACT7 - actin 7	42	0	0	0	159.48	161.86	159.88	112.02	0	44.01	283.14	225.54	262.75
AT5G44340.1	TUB4 - tubulin beta chain 4	50	0	0	0	120.74	77.213	75.984	23.614	0	0	266.5	113.22	148.3
AT4G37980.1	ELI3-1, ELI3, ATCAD7, CAD7 - elicitor-activated gene 3-1	38	166.19	176.98	169.33	0	0	0	47.69	141.63	0	0	0	0
AT3G51800.1 (+1)	ATG2, EBP1, ATEBP1 - metallopeptidase M24 family protein	43	78.72	66.046	89.958	0	0	0	160.35	169.45	142.02	0	0	0
AT3G44890.1	RPL9 - ribosomal protein L9	22	142.51	150.65	166.18	61.521	82.914	83.054	0	17.48	0	0	0	0
AT2G33800.1	Ribosomal protein S5 family protein	33	83.019	92.409	95.295	94.906	97.87	97.378	20.756	37.543	33.151	36.051	6.3624	9.317
AT4G09650.1	ATPD - ATP synthase delta-subunit gene	26	0	0	0	167.53	183.16	153.7	25.708	0	93.582	41.166	31.477	38.865
AT3G23990.1	HSP60, HSP60-3B - heat shock protein 60	61	127.55	123.39	127.38	48.443	53.689	66.033	54.631	63.019	50.157	0	0	0
AT5G03940.1	FFC, 54CP, CPSRP54, SRP54CP - chloroplast signal recognition particle 54 kDa subunit	61	89.717	103.91	120.6	38.182	20.115	43.429	42.506	142.23	56.36	28.122	0	9.5527
AT5G02240.1	NAD(P)-binding Rossmann-fold superfamily protein	27	173.95	188.52	200.15	0	0	0	13.925	51.925	74.191	0	0	0
AT3G43300.1 (+1)	ATMIN7, BEN1 - HOPM interactor 7	195	0	0	0	98.881	136	115.81	18.381	0	9.6271	116.65	202.61	150.64
AT1G06950.1	ATTIC110, TIC110 - translocon at the inner envelope membrane of chloroplasts 110	112	0	0	0	108.92	82.568	84.095	35.79	0	0	190.83	138.62	164.7
AT5G03650.1	SBE2.2 - starch branching enzyme 2.2	93	0	0	0	100.27	94.743	95.841	29.803	0	0	201.18	124.73	167.2
AT2G29630.1 (+2)	PY, THIC - thiaminC	72	16.488	20.231	29.756	95.115	103.24	88.552	27.18	57.813	43.095	112.49	94.425	78.882
AT5G55070.1	Dihydrolipoamide succinyltransferase	50	2.6143	24.683	7.3676	168.59	220.23	197.07	6.472	0	0	24.123	0	0
AT1G72150.1	PATL1 - PATELLIN 1	64	46.218	57.265	37.192	24.274	32.294	35.287	117.3	54.564	105.19	68.23	89.84	68.889
AT4G04020.1	FIB - fibrillin	35	0	0	0	178.15	145.79	153.73	8.2273	0	0	82.281	53.766	53.33
AT2G40060.1	Clathrin light chain protein	29	0	0	0	93.363	98.263	106.8	37.24	17.59	71.885	104.4	113.35	138.13
AT3G11630.1	Thioredoxin superfamily protein	29	65.713	56.428	52.025	44.931	20.81	20.848	149.84	50.304	97.011	55.246	28.148	32.248
AT5G45680.1	ATFKBP13, FKBP13 - FK506-binding protein 13	22	157.53	167.54	158.07	0	0	0	8.2273	85.332	112.73	0	0	0
AT2G43560.1	FKBP-like peptidyl-prolyl cis-trans isomerase family protein	24	108.28	103.63	145.96	13.841	0	27.17	42.496	74.882	146.26	0	0	0
AT2G25970.1	KH domain-containing protein	65	30.578	41.386	33.397	102.93	134.21	124.75	0	0	49.138	43.128	72.565	80.445
AT1G72370.1 (+1)	P40, AP40, RP40, RPSAA - 40s ribosomal protein SA	32	1.8919	10.593	12.127	98.415	90.139	85.875	57.426	35.407	29.607	104.36	78.253	85.224
AT1G03130.1	PSAD-2 - photosystem I subunit D-2	22	68.154	52.842	79.795	75.145	98.537	90.397	0	74.003	55.064	13.019	41.955	52.321
AT3G48420.1	Haloacid dehalogenase-like hydrolase (HAD) superfamily protein	34	139.84	126.94	132.64	0	0	0	61.142	108.05	79.077	0	0	0
AT4G04640.1	ATPC1 - ATPase, F1 complex, gamma subunit protein	41	0	0	0	100.28	113.42	100.23	23.729	0	0	132.93	102.19	185.66
AT1G08520.1	ALB1, ALB-1V, V157, PDE166, CHLD - ALBINA 1	83	0	0	0	39.746	33.974	26.199	0	0	0	204.58	318.45	264.69
AT1G52670.1	Single hybrid motif superfamily protein	30	61.618	82.8	102.2	82.755	144.48	112.88	0	9.6506	50.305	0	0	0
AT4G18480.1	CHLI1, CH42, CH-42, CHL11, CHLI-1 - P-loop containing nucleoside triphosphate hydrolases superfamily protein	46	95.644	104.77	114.97	50.637	36.517	54.168	34.869	26.219	2.195	39.081	38.71	51.78
AT3G44110.1	ATJ3, ATJ - DNAJ homologue 3	46	0	0	14.745	63.816	68.093	49.572	99.71	58.48	110.76	58.229	86.46	77.737
AT2G20580.1	RPN1A, ATRPN1A - 26S proteasome regulatory subunit S2 1A	98	0	0	0	113.17	85.985	68.748	66.506	43.699	52.767	89.399	111.66	58.084
AT3G45780.1 (+1)	PHOT1, NPH1, JK224, RPT1 - phototropin 1	112	0	0	0	25.087	39.351	22.581	4.2284	0	40.545	176.56	244.94	280.95
AT5G48300.1	ADG1, APS1 - ADP glucose pyrophosphorylase 1	57	47.97	47.64	38.148	18.062	17.598	14.472	95.876	85.083	71.976	90.392	73.915	97.899
AT3G25920.1	RPL15 - ribosomal protein L15	30	95.336	97.674	99.093	75.956	97.745	83.931	13.993	33.711	30.993	0	0	0
AT5G30510.1	RPS1, ARRPS1 - ribosomal protein S1	45	9.3996	1.7267	0	150.78	131.73	127.2	25.118	0	0	89.123	35.653	53.063
AT3G09440.1 (+1)	Heat shock protein 70 (Hsp 70) family protein	71	49.397	103.12	0	230.27	226.47	225.06	312.97	13.462	163.32	263.82	181.17	214.1
AT3G14067.1	Subtilase family protein	82	71.403	56.387	67.561	60.458	60.875	60.332	64.637	74.789	96.649	0	0	0
AT1G14810.1	semialdehyde dehydrogenase family protein	41	94.424	96.588	98.269	36.308	46.457	47.015	37.741	55.114	36.859	21.155	39.457	38.761
AT3G14415.1 (+1)	Aldolase-type TIM barrel family protein	40	208.8	208.03	151.41	284.18	245.34	239.56	247.71	211.04	0	219.54	52.454	54.185
AT3G12490.1	ATCYSB, ATCYS6, CYSB - cystatin B	22	111.76	89.795	106.67	31.1	55.718	37.923	22.298	56.834	101.87	0	0	0
AT2G27030.1 (+5)	CAM5, ACAM-2 - calmodulin 5	17	1.9027	0	2.8353	56.245	39.271	41.618	215.97	50.704	140.88	0	21.91	0
AT5G14780.1	FDH - formate dehydrogenase	42	112.22	110.88	120.69	0	0	0	61.475	109.87	64.228	0	0	0
AT4G08870.1	Arginase/deacetylase superfamily protein	38	113.55	102.19	108.69	46.669	50.476	51.543	24.538	64.178	34.795	12.074	0	0
AT1G48850.1	EMB1144 - chorismate synthase, putative / 5-enolpyruvylshikimate-3-phosphate phospholyase, putative	47	92.548	87.105	97.075	25.946	34.156	26.263	32.837	96.637	119.18	0	0	0
AT1G76080.1	ATCDSP32, CDSP32 - chloroplastic drought-induced stress protein of 32 kD	34	30.706	14.107	17.709	47.378	38.182	50.665	63.713	119.34	95.603	72.331	59.66	71.746
AT5G20010.1	RAN-1, RAN1, ATRAN1 - RAS-related nuclear protein-1	25	36.967	35.2	38.786	48.357	48.73	49.782	76.808	105.93	70.464	32.215	69.356	51.576
AT3G18890.1	NAD(P)-binding Rossmann-fold superfamily protein	68	12.645	9.6408	37.161	86.455	91.168	99.342	8.2273	53.548	87.426	69.221	72.171	48.042
AT1G79920.1 (+1)	Heat shock protein 70 (Hsp 70) family protein	92	57.701	63.357	43.518	0	0	1.8345	210.59	65.62	86.914	0	0	0
AT5G04430.1	BTR1, BTR1S - binding to TOMV RNA 1L (long form)	34	29.591	33.596	43.842	0	17.601	28.159	96.313	128.49	224.8	20.085	0	0
AT2G20420.1	ATP citrate lyase (ACL) family protein	45	91.277	68.673	75.13	0	0	0	101.35	163.28	118.08	0	0	0
AT2G17360.1 (+2)	Ribosomal protein S4 (RPS4A) family protein	30	79.491	69.509	62.18	113.22	116.94	110.38	8.2273	0	0	21.987	0	0
AT1G05190.1	emb2394 - Ribosomal protein L6 family	25	123.08	112.67	102.86	65.54	54.783	61.499	0	84.944	0	0	0	0
AT3G61260.1	Remorin family protein	23	35.22	24.683	37.225	68.995	54.571	75.141	20.954	48.094	67.011	72.395	124.34	68.194
AT5G20290.1	Ribosomal protein S8e family protein	25	88.084	93.354	69.605	102	131.63	104.97	0	0	0	0	0	0
AT5G64430.1	Octicosapeptide/Phox/Bem1p family protein	56	0	1.853	0	67.504	78.521	72.373	55.21	47.956	139.62	55.74	95.348	58.937
AT3G01280.1	VDAC1, ATVDAC1 - voltage dependent anion channel 1	29	58.967	57.234	56.525	87.318	99.1	76.902	5.4849	41.403	38.372	38.15	13.83	45.273
AT1G52380.1	NUP50 (Nucleoporin 50 kDa) protein	47	0	11.457	26.925	17.315	49.668	49.756	67.388	65.528	192.81	50.258	69.234	82.188
ATCG00800.1	structural constituent of ribosome	25	17.921	1.853	14.735	77.987	70.299	63.187	39.349	40.885	0	92.441	94.511	108.44
AT4G34200.1	EDA9 - D-3-phosphoglycerate dehydrogenase	63	46.433	29.077	28.943	86.558	57.943	95.915	61.53	146.13	0	15.876	0	13.025
AT5G37510.1	EMB1467, CI76 - NADH-ubiquinone dehydrogenase, mitochondrial, putative	81	20.013	24.624	14.864	77.825	103.07	90.369	18.84	30.438	14.304	109.49	73.94	77.759
AT1G65930.1	cICDH - cytosolic NADP+-dependent isocitrate dehydrogenase	46	99.417	102.22	82.779	0	0	0	94.093	122.08	84.731	0	0	0
AT4G02510.1	TOC159, TOC86, PPI2, TOC160, ATTOC159 - translocon at the outer envelope membrane of chloroplasts 159	161	0	0	0	43.132	44.575	39.804	0	0	0	180.63	380.7	101.27
AT2G47110.1 (+1)	UBQ6 - ubiquitin 6	18	90.338	80.294	93.518	78.588	74.114	64.183	11.209	0	31.223	37.164	0	0
AT3G63540.1	Mog1/PsbP/DUF1795-like photosystem II reaction center PsbP family protein	16	113.3	106.6	122.5	0	0	19.872	26.535	77.573	126.91	0	0	0
AT5G28500.1	unknown protein; FUNCTIONS IN: molecular_function unknown; INVOLVED IN: biological_process unknown; LOCATED IN: chloroplast stroma, chloroplast; EXPRESSED IN: 23 plant structures; EXPRESSED DURING: 13 growth stages; BEST Arabidopsis thaliana protein match is: unknown protein (TAIR:AT3G04550.1); Has 109 Blast hits to 109 proteins in 49 species: Archae - 0; Bacteria - 67; Metazoa - 0; Fungi - 0; Pl…	48	0	0	0	41.523	25.644	38.813	87.049	0	25.168	127.53	104.97	253.47
AT4G34870.1	ROC5, ATCYP1 - rotamase cyclophilin 5	18	109.76	113.23	134.98	0	12.069	28.944	38.213	82.111	101.45	0	0	0
AT3G23810.1	SAHH2, ATSAHH2 - S-adenosyl-l-homocysteine (SAH) hydrolase 2	53	0	77.589	65.837	170.97	118.03	111.11	190.44	139.96	117.17	189.64	172.8	226.82
AT4G21210.1	ATRP1, RP1 - PPDK regulatory protein	44	0	0	0	116.47	145.21	109.34	23.046	32.461	11.934	72.203	3.812	67.009
AT1G03600.1	PSB27 - photosystem II family protein	19	119.07	128.58	132.71	13.841	10.503	33.448	21.711	28.16	77.725	0	0	0
AT3G02090.1	MPPBETA - Insulinase (Peptidase family M16) protein	59	22.422	22.014	0	100.16	113.97	121.19	21.035	2.254	0	78.144	57.9	38.969
AT3G49010.1 (+2)	ATBBC1, BBC1, RSU2 - breast basic conserved 1	24	70.622	76.619	72.491	90.779	123.17	101.11	0	0	0	0	0	0
AT2G38540.1	LP1, LTP1, ATLTP1 - lipid transfer protein 1	12	99.263	91.588	99.478	0	9.043	20.778	23.046	94.078	104.5	0	0	0
AT1G69830.1	ATAMY3, AMY3 - alpha-amylase-like 3	100	0	0	0	57.774	49.666	37.954	120.93	32.425	42.826	98.474	64.674	68.313
AT5G49910.1	CPHSC70-2EAT SHOCK PROTEIN 70-2, HSC70-7, cpHsc70-2 - chloroplast heat shock protein 70-2	77	204.77	209.57	218.1	285.01	328.74	335.4	155.49	123.65	197.3	0	0	0
AT5G10470.1	KCA1, KAC1 - kinesin like protein for actin based chloroplast movement 1	141	0	0	0	83.879	102.49	86.783	0	0	0	130.44	138.47	110.86
AT5G63400.1	ADK1 - adenylate kinase 1	27	42.384	51.087	69.52	73.654	70.948	96.832	0	42.775	76.795	12.305	27.477	9.5168
AT1G01790.1	KEA1, ATKEA1 - K+ efflux antiporter 1	128	0	0	0	84.549	112.08	90.423	38.46	0	26.342	59.073	113.65	92.757
AT2G22780.1	PMDH1 - peroxisomal NAD-malate dehydrogenase 1	37	54.776	57.229	73.413	100.3	98.639	105.84	0	56.905	0	39.128	8.1439	20.139
AT4G21860.1 (+1)	MSRB2 - methionine sulfoxide reductase B 2	22	99.305	94.297	98.391	33.481	43.614	50.59	14.034	19.568	94.568	0	0	0
AT1G70600.1	Ribosomal protein L18e/L15 superfamily protein	16	58.988	71.423	74.249	70.83	89.313	85.888	0	0	0	36.159	57.978	39.956
AT1G57720.1 (+1)	Translation elongation factor EF1B, gamma chain	46	22.422	38.79	27.753	24.274	0	10.873	108.29	83.982	81.168	41.194	57.947	63.345
AT5G19760.1	Mitochondrial substrate carrier family protein	32	14.795	14.107	11.051	77.439	89.927	75.093	5.4849	42.206	10.634	89.077	85.682	112.4
AT3G49120.1	ATPERX34, PERX34, PRXCB, ATPCB, PRX34 - peroxidase CB	39	75.284	95.151	104.82	0	0	0	44.597	120.22	126.62	0	0	0
AT3G19170.1	ATPREP1, ATZNMP, PREP1 - presequence protease 1	121	17.663	17.638	18.548	0	0	0	270.19	52.54	106.46	0	0	0
AT5G48880.2 (+1)	PKT2, KAT5 - peroxisomal 3-keto-acyl-CoA thiolase 2	48	87.198	91.63	90.848	48.13	46.64	33.452	35.739	91.636	51.269	40.405	7.6376	15.357
AT4G20850.1	TPP2 - tripeptidyl peptidase ii	152	83.923	79.305	74.344	0	0	0	156.51	65.625	35.807	0	0	0
AT3G62870.1	Ribosomal protein L7Ae/L30e/S12e/Gadd45 family protein	29	47.191	44.926	49.192	115.04	135.38	114.83	0	17.581	0	8.0241	0	0
AT1G09130.1 (+1)	ATP-dependent caseinolytic (Clp) protease/crotonase family protein	36	16.483	8.7388	9.2364	69.581	80.535	73.991	27.153	9.0387	10.733	90.16	110.93	83.887
AT3G53430.1	Ribosomal protein L11 family protein	18	66.579	72.261	70.638	60.687	69.786	68.748	16.813	39.304	39.56	13.991	0	0
AT1G07140.1	SIRANBP - Pleckstrin homology (PH) domain superfamily protein	26	18.38	41.386	38.031	0	0	0	139.01	76.047	233.11	0	0	0
AT5G16390.1	CAC1, CAC1A, BCCP, BCCP1 - chloroplastic acetylcoenzyme A carboxylase 1	30	6.152	32.549	25.024	88.263	107.61	113.07	15.43	5.5296	99.266	36.151	0	6.0182
AT4G17040.1	CLPR4 - CLP protease R subunit 4	33	15.725	0	14.864	80.398	85.472	93.013	11.209	21.648	19.163	89.997	74.761	83.046
AT1G70730.1 (+1)	PGM2 - Phosphoglucomutase/phosphomannomutase family protein	63	4.8991	32.598	15.631	0	0	1.785	143.64	129.68	83.764	0	0	4.7801
AT1G78630.1	emb1473 - Ribosomal protein L13 family protein	27	88.669	87.97	87.143	83.045	82.717	85.052	0	0	0	0	0	0
AT1G09310.1	Protein of unknown function, DUF538	20	58.973	71.374	69.445	0	0	0	38.377	131.78	200.67	0	0	0
AT5G02870.1 (+1)	Ribosomal protein L4/L1 family	45	26.472	20.307	15.862	118.43	113.85	105.72	0	101.11	0	0	0	0
AT2G43030.1	Ribosomal protein L3 family protein	29	72.801	63.269	78.611	73.734	85.985	95.022	0	49.25	0	0	0	0
AT3G62410.1	CP12-2, CP12 - CP12 domain-containing protein 2	14	93.654	107.57	111.76	3.649	4.0856	19.919	39.979	46.023	87.391	0	0	0
AT3G17240.1 (+1)	mtLPD2 - lipoamide dehydrogenase 2	54	230.29	207.56	276.91	0	0	0	103.22	301.92	77.698	0	0	0
AT5G61410.1 (+1)	RPE, EMB2728 - D-ribulose-5-phosphate-3-epimerase	30	50.918	75.623	61.239	19.948	21.858	11.722	52.636	76.473	50.291	49.158	39.422	47.085
AT3G56340.1	Ribosomal protein S26e family protein	15	36.988	32.607	33.412	78.183	92.148	57.862	24.58	46.888	8.2473	28.115	70.987	59.877
AT1G07890.1 (+7)	APX1, MEE6, CS1, ATAPX1, ATAPX01 - ascorbate peroxidase 1	28	102.4	109.39	114.06	0	0	0	70.574	80.354	71.695	9.0066	0	0
AT3G20390.1	endoribonuclease L-PSP family protein	20	81.684	88.833	116.02	0	0	0	39.76	97.182	113.7	0	0	0
AT3G15190.1	chloroplast 30S ribosomal protein S20, putative	22	60.677	64.243	81.499	94.959	111.28	98.427	0	0	0	0	0	0
AT1G20200.1	EMB2719, HAP15 - PAM domain (PCI/PINT associated module) protein	56	0	0	0	66.678	75.778	61.512	25.808	4.1772	9.5362	99.562	127.37	133.96
AT5G65220.1	Ribosomal L29 family protein	19	100.02	80.975	81.581	76.198	80.213	71.384	0	0	0	0	0	0
AT5G61790.1	CNX1, ATCNX1 - calnexin 1	60	0	0	0	45.612	45.413	33.461	47.413	0	0	116.46	185.79	165.17
AT3G61440.1	ATCYSC1, ARATH;BSAS3;1, CYSC1 - cysteine synthase C1	40	69.8	57.29	54.748	0	0	0	44.76	150.31	120.57	0	14.056	0
AT1G12410.1	CLPR2, NCLPP2, CLP2 - CLP protease proteolytic subunit 2	31	0	0	0	64.019	71.06	67.779	9.2862	17.48	0	110.39	116.69	144
AT1G67430.1	Ribosomal protein L22p/L17e family protein	20	65.384	83.702	102.09	43.92	47.623	53.292	7.0424	40.334	7.0875	8.0494	12.562	12.816
AT4G25370.1	Double Clp-N motif protein	26	31.199	36.925	40.909	58.797	60.852	74.145	27.962	66.139	116.41	0	0	0
AT2G17265.1	HSK, DMR1 - homoserine kinase	39	113.87	111.94	135.57	0	0	0	12.577	121.9	0	0	0	0
AT5G35170.1	adenylate kinase family protein	66	11.715	21.152	8.3127	78.587	58.94	56.994	30.884	37.21	0	84.393	65.448	92.261
AT4G27320.1	ATPHOS34, PHOS34 - Adenine nucleotide alpha hydrolases-like superfamily protein	28	0	0	12.942	3.4708	18.561	8.8966	77.676	105.64	158.02	34.02	65.527	49.287
AT5G67500.1 (+1)	VDAC2, ATVDAC2 - voltage dependent anion channel 2	30	61.328	63.482	72.54	58.827	49.685	54.339	0	48.094	0	33.183	45.813	25.841
AT5G46800.1	BOU - Mitochondrial substrate carrier family protein	31	0	0	0	55.259	48.824	65.094	0	30.407	0	137.74	113.34	129.53
AT1G22780.1 (+2)	PFL, RPS18A, PFL1 - Ribosomal protein S13/S18 family	18	78.119	65.251	73.314	81.181	77.678	80.552	0	6.9183	0	0	0	0
AT3G19420.1	ATPEN2, PEN2 - PTEN 2	66	0	0	0	7.0249	24.833	21.708	19.556	17.48	28.745	119.64	217.94	211.71
AT4G31990.1 (+2)	ASP5, AAT3, ATAAT1 - aspartate aminotransferase 5	50	89.718	87.267	58.47	0	0	0	79.076	115.37	43.095	0	0	0
AT4G17090.1	CT-BMY, BAM3, BMY8 - chloroplast beta-amylase	61	14.795	22.051	31.696	46.752	52.845	57.041	29.897	28.484	9.5362	85.41	90.25	85.578
AT3G05530.1	RPT5A, ATS6A.2 - regulatory particle triple-A ATPase 5A	47	1.7429	9.6636	11.245	127.09	95.734	101.18	18.014	0	0	60.013	41.579	25.556
AT2G05710.1	ACO3 - aconitase 3	108	112.53	113.71	54.828	0	0	0	66.997	82.146	47.908	0	0	0
AT3G50820.1	PSBO2, PSBO-2, OEC33 - photosystem II subunit O-2	35	329.63	300.59	323.3	150.58	155.65	178.22	102.33	156.26	294.7	0	0	0
AT5G08300.1	Succinyl-CoA ligase, alpha subunit	36	68.856	60.501	71.265	0	0	0	57.726	110.49	105.63	0	0	0
AT2G04030.1	CR88, EMB1956, HSP90.5, Hsp88.1, AtHsp90.5 - Chaperone protein htpG family protein	89	0	0	0	69.001	11.33	10.873	177.37	9.77	37.125	53.306	13.14	36.897
AT5G25980.2	TGG2, BGLU37 - glucoside glucohydrolase 2	63	28.133	39.522	4.6627	0	0	0	234.67	55.832	86.105	0	0	0
AT2G45960.3 (+2)	PIP1B, TMP-A, ATHH2, PIP1;2 - plasma membrane intrinsic protein 1B	32	0	0	0	105.22	137.85	60.505	69.52	0	0	43.141	0	45.613
AT1G75350.1	emb2184 - Ribosomal protein L31	16	64.046	85.225	77.617	60.042	85.309	87.567	0	3.8821	0	0	0	0
AT3G52150.1 (+1)	RNA-binding (RRM/RBD/RNP motifs) family protein	28	102.81	113.6	142.49	0	0	0	19.556	35.825	65.698	0	0	0
AT3G63190.1	RRF, HFP108, cpRRF, AtcpRRF - ribosome recycling factor, chloroplast precursor	30	85.616	118.91	119.87	10.224	16.555	10.835	16.813	36.115	50.345	0	0	0
AT1G65980.1	TPX1 - thioredoxin-dependent peroxidase 1	17	97.116	87.08	87.973	0	0	0	31.624	72.684	120.58	0	0	0
AT5G56030.1 (+1)	HSP81-2, ERD8, HSP90.2, AtHsp90.2 - heat shock protein 81-2	80	0	0	0	13.841	0	0	185.27	0	0	79.438	92.739	104.27
AT1G49970.1	CLPR1, NCLPP5, SVR2 - CLP protease proteolytic subunit 1	43	0	0	0	49.171	78.364	61.426	7.516	9.77	0	101.26	87.35	119.41
AT2G27530.1 (+1)	PGY1 - Ribosomal protein L1p/L10e family	24	45.248	50.972	61.036	71.959	77.596	56.074	1.3443	85.612	0	0	2.5504	6.0182
AT2G36160.1	Ribosomal protein S11 family protein	16	63.543	56.363	57.405	65.804	80.299	82.231	0	46.295	9.5362	0	0	0
AT2G21870.1	MGP1 - copper ion binding;cobalt ion binding;zinc ion binding	28	33.863	24.634	37.172	92.233	117.43	114.71	0	0	0	0	0	0
AT1G47128.1	RD21, RD21A - Granulin repeat cysteine protease family protein	51	13.779	22.886	19.536	59.83	50.662	44.296	47.643	17.48	21.6	84.404	60.002	66.204
AT5G13510.1	Ribosomal protein L10 family protein	25	62.557	53.568	70.25	38.093	50.323	55.049	11.209	71.545	19.103	24.098	0	0
AT4G19410.1	Pectinacetylesterase family protein	42	92.907	89.962	101.22	0	0	0	25.86	127.52	31.132	0	0	0
AT4G25130.1	PMSR4 - peptide met sulfoxide reductase 4	29	82.743	73.088	82.487	8.802	8.5092	7.2488	25.98	38.288	68.266	12.036	25.195	12.816
AT2G47470.1	ATPDIL2-1, UNE5, MEE30, PDI11, ATPDI11 - thioredoxin family protein	39	75.686	78.459	96.682	0	0	0	5.7241	0	9.5362	64.269	85.196	72.797
AT1G12250.1 (+1)	Pentapeptide repeat-containing protein	30	87.637	60.789	63.206	41.523	45.411	53.384	5.4849	26.219	84.993	0	0	0
AT3G52880.1	ATMDAR1, MDAR1 - monodehydroascorbate reductase 1	46	52.83	46.714	33.477	0	0	0	102.63	84.994	123.19	0	0	0
AT3G52300.1	ATPQ - ATP synthase D chain, mitochondrial	20	25.777	38.79	48.341	104.63	116.75	111.18	0	0	0	0	0	0
AT5G09510.1	Ribosomal protein S19 family protein	17	56.08	53.72	63.182	81.924	108.46	88.497	0	0	0	0	0	0
AT1G03680.1	ATHM1, TRX-M1, ATM1, THM1 - thioredoxin M-type 1	20	48.429	49.375	44.593	43.15	33.11	36.18	32.085	35.921	94.407	16.073	37.758	0
AT3G46780.1	PTAC16 - plastid transcriptionally active 16	54	0	0	1.9746	139.09	121.33	117.59	0	0	0	29.105	31.326	12.816
AT2G47400.1	CP12-1, CP12 - CP12 domain-containing protein 1	13	44.879	60.137	76.346	32.107	39.525	28.966	44.948	46.074	77.94	0	0	0
AT1G34220.1 (+1)	Regulator of Vps4 activity in the MVB pathway protein	73	0	0	0	24.169	30.025	28.944	39.931	0	94.394	116.47	115.15	105.48
AT2G30970.1 (+1)	ASP1 - aspartate aminotransferase 1	48	119.89	116.28	121.69	0	0	0	11.448	63.022	0	0	0	0
AT3G04400.2 (+3)	emb2171 - Ribosomal protein L14p/L23e family protein	13	38.434	54.52	59.252	58.49	94.77	89.572	0	28.143	7.0875	0	0	0
AT3G47650.1	DnaJ/Hsp40 cysteine-rich domain superfamily protein	15	50.913	44.046	40.735	60.394	47.575	65.935	25.948	43.782	53.878	0	0	0
AT4G35450.1 (+2)	AKR2, AFT, AKR2A - ankyrin repeat-containing protein 2	37	17.659	44.116	22.3	50.347	68.481	51.665	64.576	28.475	107.57	28.279	42.071	5.9335
AT4G18440.1	L-Aspartase-like family protein	60	57.355	52.914	53.844	0	0	0	68.589	103.49	83.588	0	0	0
AT1G53750.1	RPT1A - regulatory particle triple-A 1A	48	0	7.9918	0	97.934	88.674	95.845	4.0535	20.79	7.0525	44.196	50.91	43.049
AT4G35000.1	APX3 - ascorbate peroxidase 3	32	0	1.7984	2.8353	68.181	65.915	95.881	0	5.6662	2.473	91.554	51.87	95.379
AT3G02540.1 (+1)	RAD23-3, RAD23C - Rad23 UV excision repair protein family	44	14.795	17.638	26.045	116.84	118.98	102.16	0	17.48	28.745	0	0	0
AT1G23190.1	PGM3 - Phosphoglucomutase/phosphomannomutase family protein	63	19.624	34.285	16.656	0	0	20.779	124.82	156.14	84.886	0	0	0
AT4G00100.1	ATRPS13A, RPS13, PFL2, RPS13A - ribosomal protein S13A	17	36.759	35.268	36.28	88.845	109.93	92.317	0	0	0	16.073	25.195	0
AT3G03250.1	UGP, UGP1, AtUGP1 - UDP-GLUCOSE PYROPHOSPHORYLASE 1	52	36.854	38.79	34.37	0	0	0	78.968	220.66	44.143	0	0	0
AT3G57610.1	ADSS - adenylosuccinate synthase	53	84.007	89.04	85.437	0	0	0	42.641	95.144	46.738	0	0	0
AT4G34620.1	SSR16 - small subunit ribosomal protein 16	13	45.16	69.506	65.886	76.206	82.848	85.81	0	0	0	0	0	0
AT5G15090.1 (+1)	VDAC3, ATVDAC3 - voltage dependent anion channel 3	29	81.16	88.165	80.728	94.292	122.46	113.01	0	61.178	0	37.216	0	0
AT1G02780.1	emb2386 - Ribosomal protein L19e family protein	25	48.006	49.366	51.96	80.261	69.43	84.961	0	0	0	0	25.195	32.942
AT5G54430.1	ATPHOS32, PHOS32 - Adenine nucleotide alpha hydrolases-like superfamily protein	26	37.997	42.297	44.691	40.707	54.943	78.8	32.163	71.951	23.84	5.931	45.774	3.5851
AT5G19510.1	Translation elongation factor EF1B/ribosomal protein S6 family protein	24	43.205	33.519	25.972	17.249	24.833	21.708	88.919	83.027	97.174	0	0	0
AT3G08590.1 (+1)	Phosphoglycerate mutase, 2,3-bisphosphoglycerate-independent	61	79.251	95.167	39.876	0	0	0	83.027	93.763	14.121	0	0	0
AT4G03520.1	ATHM2 - Thioredoxin superfamily protein	20	49.429	39.628	65.733	39.644	44.903	44.151	23.858	28.16	89.503	0	0	0
AT4G16143.1 (+1)	IMPA-2 - importin alpha isoform 2	59	0	0	0	107.9	74.084	66.934	0	0	9.6271	76.355	48.214	93.257
AT4G30920.1	Cytosol aminopeptidase family protein	61	80.355	86.274	79.901	0	0	0	62.69	176.02	61.992	0	0	0
AT2G36250.1 (+1)	FTSZ2-1, ATFTSZ2-1 - Tubulin/FtsZ family protein	51	0	0	0	91.518	81.583	73.159	0	0	0	66.154	44.532	94.659
AT3G63460.1	transducin family protein / WD-40 repeat family protein	120	0	0	0	65.67	49.382	46.984	18.097	17.48	19.163	101.47	76.861	112.8
AT1G79340.1	AtMC4, MC4 - metacaspase 4	45	16.054	18.381	12.272	38.038	54.499	53.338	60.418	26.219	46.621	31.09	31.201	46.468
AT3G05590.1	RPL18 - ribosomal protein L18	21	40.046	37.019	48.326	103.93	102.72	92.317	0	0	0	0	0	0
AT2G20760.1	Clathrin light chain protein	37	0	24.508	26.045	84.585	104.4	80.498	28.738	26.219	47.863	20.098	56.707	38.761
AT4G34450.1	coatomer gamma-2 subunit, putative / gamma-2 coat protein, putative / gamma-2 COP, putative	98	0	0	0	59.941	62.849	61.525	22.111	0	0	81.646	108.41	113.86
AT2G26080.1	AtGLDP2, GLDP2 - glycine decarboxylase P-protein 2	114	299.21	291.26	185.36	0	0	0	292.43	177.15	133.64	0	0	0
AT1G66670.1	CLPP3, NCLPP3 - CLP protease proteolytic subunit 3	34	0	0	0	116.18	80.333	104.9	0	0	0	85.208	26.486	4.8232
AT1G74970.1	RPS9, TWN3 - ribosomal protein S9	23	62.766	50.236	48.341	31.09	45.643	36.18	0	26.219	0	95.408	50.426	0
AT3G57410.1	VLN3, ATVLN3 - villin 3	106	26.007	22.836	22.296	24.646	33.182	7.1607	97.238	100.55	126.01	12.074	0	0
AT4G24190.2 (+1)	SHD, AtHsp90.7, AtHsp90-7 - Chaperone protein htpG family protein	94	0	0	0	38.115	20.578	19.872	0	0	0	181.05	142.06	167.84
AT3G22890.1	APS1 - ATP sulfurylase 1	51	64.679	75.614	53.676	19.963	20.744	23.498	48.011	66.119	21.228	0	0	0
AT1G32470.1	Single hybrid motif superfamily protein	18	122.84	124.81	133.97	0	0	0	41.892	46.869	127.66	0	0	0
AT5G51970.1 (+1)	GroES-like zinc-binding alcohol dehydrogenase family protein	39	88.072	133.07	110.29	0	0	0	36.327	13.033	0	0	0	0
AT3G56650.1	Mog1/PsbP/DUF1795-like photosystem II reaction center PsbP family protein	29	64.369	66.996	60.482	0	0	0	28.603	75.474	86.189	0	12.633	0
AT5G67360.1	ARA12 - Subtilase family protein	79	55.931	57.336	84.557	0	0	0	23.666	113.25	79.193	0	0	0
AT1G26630.1	FBR12, ATELF5A-2, ELF5A-2 - Eukaryotic translation initiation factor 5A-1 (eIF-5A 1) protein	17	88.205	68.984	69.899	0	0	0	90.998	34.14	26.308	0	0	0
AT4G26910.1 (+1)	Dihydrolipoamide succinyltransferase	50	29.565	21.186	8.3086	137.48	162.34	168.97	0	0	0	0	0	0
AT1G07110.1	F2KP, ATF2KP, FKFBP - fructose-2,6-bisphosphatase	83	0	0	0	66.445	71.635	68.834	0	0	0	118.65	91.819	59.182
AT3G13300.1 (+1)	VCS - Transducin/WD40 repeat-like superfamily protein	146	0	0	0	79.452	53.12	69.632	0	0	10.733	97.433	82.264	77.379
AT1G63940.2 (+2)	MDAR6 - monodehydroascorbate reductase 6	53	65.32	66.15	38.084	0	0	0	82.112	103.77	38.326	0	0	0
AT3G20820.1	Leucine-rich repeat (LRR) family protein	40	30.477	35.268	37.161	80.451	52.759	58.758	5.4849	32.731	0	40.182	5.906	0
AT3G05420.2	ACBP4 - acyl-CoA binding protein 4	73	0	0	0	34.555	37.133	43.403	17.544	0	2.2112	94.314	138.19	155.99
AT1G43170.1 (+7)	ARP1, emb2207, RPL3A, RP1 - ribosomal protein 1	45	8.8014	8.9042	0	88.875	135.21	93.007	1.296	0	0	28.122	7.6422	6.0182
AT4G02520.1	ATGSTF2, ATPM24.1, ATPM24, GST2, GSTF2 - glutathione S-transferase PHI 2	24	49.924	49.337	62.317	0	0	0	40.471	150.74	62.303	0	0	0
AT4G37300.1	MEE59 - maternal effect embryo arrest 59	19	59.09	49.217	67.797	12.581	34.339	33.401	32.3	16.437	105.4	0	0	0
AT5G54600.1	Translation protein SH3-like family protein	22	82.625	74.873	78.842	37.938	55.015	36.18	0	23.765	0	0	0	0
AT3G50970.1	LTI30, XERO2 - dehydrin family protein	21	6.4484	0	6.318	134.43	141.1	101.98	0	0	0	0	0	0
AT3G09820.2	ADK1 - adenosine kinase 1	33	57.884	58.129	59.522	0	0	0	81.173	69.918	58.685	0	0	0
AT3G15690.2	Single hybrid motif superfamily protein	28	48.505	56.542	71.683	59.598	46.622	46.027	0	29.626	43.194	0	0	0
AT3G27830.1 (+1)	RPL12-A, RPL12 - ribosomal protein L12-A	20	32.396	29.135	38.057	43.224	50.76	56.882	19.675	36.069	57.444	28.135	12.562	0
AT5G35100.1	Cyclophilin-like peptidyl-prolyl cis-trans isomerase family protein	31	52.501	40.499	63.206	50.261	58.406	54.276	13.951	21.824	9.5362	21.134	12.633	0
AT2G31670.1	Stress responsive alpha-beta barrel domain protein	29	115.3	97.647	124.23	0	0	0	11.029	15.145	0	0	0	0
AT1G56340.1	CRT1, CRT1a, AtCRT1a - calreticulin 1a	49	0	0	0	0	0	0	0	0	0	175.27	192.59	164.06
AT2G19940.1 (+1)	oxidoreductases, acting on the aldehyde or oxo group of donors, NAD or NADP as acceptor;copper ion binding	44	93.115	131.33	107.69	0	0	0	5.4849	43.75	0	0	0	0
AT3G57560.1	NAGK - N-acetyl-l-glutamate kinase	37	33.633	26.46	53.84	57.855	63.014	67.856	11.951	53.566	23.931	0	0	0
AT5G40370.1	Glutaredoxin family protein	12	86.874	82.04	81.883	0	0	0	27.903	48.094	68.266	0	0	0
AT5G13410.1	FKBP-like peptidyl-prolyl cis-trans isomerase family protein	28	59.586	53.761	84.464	43.104	23.683	41.519	0	42.354	58.495	0	0	0
AT2G44920.2	Tetratricopeptide repeat (TPR)-like superfamily protein	24	103.61	74.836	96.526	0	0	0	28.142	33.822	56.178	0	0	0
AT1G73230.1	Nascent polypeptide-associated complex NAC	18	20.239	8.7791	23.155	0	0	0	87.341	89.436	179.5	0	0	0
ATCG00470.1	ATPE - ATP synthase epsilon chain	14	0	0	1.9456	42.406	53.457	52.391	0	30.564	33.558	60.286	83.706	87.344
AT5G40950.1	RPL27 - ribosomal protein large subunit 27	22	70.314	68.73	63.206	53.546	74.498	57.888	0	0	0	0	0	0
AT5G19990.1	RPT6A, ATSUG1 - regulatory particle triple-A ATPase 6A	47	31.288	46.572	62.1	76.557	56.842	57.018	0	42.359	4.4225	11.142	0	0
AT3G15360.1	ATHM4, TRX-M4, ATM4 - thioredoxin M-type 4	21	50.588	55.431	58.377	17.249	23.785	32.581	29.279	26.219	89.49	0	0	0
ATCG00780.1	RPL14 - ribosomal protein L14	14	62.936	59.035	54.607	45.035	47.346	32.568	5.7241	51.135	35.856	0	0	0
AT2G32060.1 (+2)	Ribosomal protein L7Ae/L30e/S12e/Gadd45 family protein	15	45.272	42.313	44.593	48.443	49.666	39.779	44.955	43.699	70.598	0	0	0
AT1G48350.1	Ribosomal L18p/L5e family protein	19	50.53	47.578	64.173	58.667	66.221	68.748	0	0	0	0	0	0
AT5G09650.1	AtPPa6, PPa6 - pyrophosphorylase 6	33	47.906	76.73	79.76	0	0	0	65.231	76.314	14.441	0	0	0
AT3G54400.1	Eukaryotic aspartyl protease family protein	45	84.895	66.031	95.645	0	0	0	1.4313	80.599	74.133	0	0	0
AT5G51110.1	Transcriptional coactivator/pterin dehydratase	24	39.098	27.218	37.161	66.842	45.596	67.843	0	25.051	19.103	30.095	0	26.873
AT5G54810.1	TSB1, TRPB, TRP2, ATTSB1 - tryptophan synthase beta-subunit 1	51	11.12	0	0	74.125	63.295	71.317	16.933	0	0	49.035	52.13	77.417
AT5G57290.3	60S acidic ribosomal protein family	12	0	0	0	6.8159	3.9604	14.472	50.561	21.824	84.205	87.45	84.617	91.873
AT4G11600.1	ATGPX6, PHGPX, LSC803, GPX6 - glutathione peroxidase 6	26	53.621	63.417	60.354	0	0	0	25.16	73.186	131.86	0	0	0
AT1G79850.1	RPS17, CS17, PRPS17 - ribosomal protein S17	16	51.554	47.659	52.025	61.452	70.244	83.241	0	0	0	0	0	0
AT1G76100.1	PETE1 - plastocyanin 1	18	93.462	88.783	91.491	0	0	0	3.3377	27.329	70.188	0	0	0
AT4G11010.1	NDPK3 - nucleoside diphosphate kinase 3	26	52.591	68.676	72.225	38.01	16.555	28.944	12.568	50.165	47.863	0	0	0
AT5G15200.1	Ribosomal protein S4	23	0	0	0	79.637	83.361	70.575	5.4849	0	0	47.051	71.073	61.612
AT5G09590.1	MTHSC70-2, HSC70-5 - mitochondrial HSO70 2	73	33.058	44.984	33.412	52.788	71.772	68.703	13.001	55.262	83.412	0	0	0
AT1G29350.1	Kinase-related protein of unknown function (DUF1296)	91	0	0	0	3.4918	0	1.7923	17.529	0	28.745	128.35	175.83	130.27
AT3G14310.1	ATPME3, PME3 - pectin methylesterase 3	64	71.568	79.968	77.143	0	0	0	22.418	69.758	70.661	0	0	0
AT3G18190.1	TCP-1/cpn60 chaperonin family protein	58	5.8005	32.542	15.876	34.498	29.627	33.477	46.664	143.05	8.567	0	0	0
AT5G16130.1	Ribosomal protein S7e family protein	22	74.625	87.145	97.315	36.125	28.101	34.306	0	0	0	0	0	0
AT3G06050.1	PRXIIF, ATPRXIIF - peroxiredoxin IIF	21	85.91	93.545	107.6	0	0	0	0	17.48	70.615	0	0	0
AT2G42130.1 (+2)	Plastid-lipid associated protein PAP / fibrillin family protein	30	0	0	0	47.531	48.609	39.815	26.639	10.748	0	80.345	96.994	67.081
AT2G42530.1	COR15B - cold regulated 15b	15	88.772	95.227	74.451	31.09	16.555	28.001	0	0	19.163	0	0	0
AT2G43090.1	Aconitase/3-isopropylmalate dehydratase protein	27	67.236	92.572	94.674	0	0	0	13.284	27.357	86.144	0	0	0
AT1G45000.1	AAA-type ATPase family protein	45	22.422	19.363	18.548	63.097	45.643	48.88	11.209	21.875	9.6271	67.232	26.824	52.703
AT2G47710.1	Adenine nucleotide alpha hydrolases-like superfamily protein	17	19.067	23.749	26.904	62.161	87.825	78.681	0	37.197	13.171	0	0	0
AT5G05010.1 (+1)	clathrin adaptor complexes medium subunit family protein	58	0	0	0	39.435	40.691	43.291	3.3125	3.8821	5.5037	117.91	71.573	66.936
AT3G11940.1 (+1)	ATRPS5A, AML1, RPS5A - ribosomal protein 5A	23	20.355	27.374	31.631	64.134	68.537	65.124	13.362	38.412	20.4	2.0719	0	3.5435
AT3G16910.1	AAE7, ACN1 - acyl-activating enzyme 7	63	71.104	74.017	64.918	0	0	0	26.722	72.803	34.783	0	0	0
AT3G11710.1	ATKRS-1 - lysyl-tRNA synthetase 1	71	37.218	42.321	62.134	0	0	0	71.197	81.163	63.166	0	0	0
AT1G14320.1	SAC52, RPL10, RPL10A - Ribosomal protein L16p/L10e family protein	25	25.777	30.807	33.412	45.906	65.106	43.416	8.5862	19.563	0	39.101	43.988	0
AT1G54220.1 (+1)	Dihydrolipoamide acetyltransferase, long form protein	58	0	0	0	110.12	139.95	118.54	0	0	13.171	24.11	0	0
AT1G09590.1 (+1)	Translation protein SH3-like family protein	19	19.555	42.308	34.271	77.768	82.74	73.075	0	6.3775	0	0	0	0
AT1G22450.1	COX6B, ATCOX6B2 - cytochrome C oxidase 6B	21	0	0	0	64.019	62.449	86.89	0	0	0	36.152	89.901	71.114
AT1G30230.1 (+1)	Glutathione S-transferase, C-terminal-like;Translation elongation factor EF1B/ribosomal protein S6	25	0	0	0	0	2.0848	0	135	40.575	79.217	21.318	32.473	16.011
AT4G13430.1	IIL1, ATLEUC1 - isopropyl malate isomerase large subunit 1	55	63.797	47.605	49.355	0	0	0	44.836	87.084	57.173	0	0	0
AT2G19730.1 (+2)	Ribosomal L28e protein family	16	36.08	37.95	46.495	62.342	81.773	74.22	0	0	0	0	0	0
AT1G21380.1	Target of Myb protein 1	56	0	0	0	19.839	19.889	15.499	46.268	3.3006	58.749	98.604	56.68	61.615
AT4G13930.1	SHM4 - serine hydroxymethyltransferase 4	52	57.815	50.222	33.348	0	0	0	69.893	101.25	21.366	0	0	0
AT4G04210.1	PUX4 - plant UBX domain containing protein 4	33	0	0	0	0	0	0	76.21	71.935	169.41	17.109	17.828	10.841
AT1G04530.1	TPR4 - Tetratricopeptide repeat (TPR)-like superfamily protein	35	0	0	0	20.761	12.069	0	0	0	0	139.46	135.97	159.52
AT2G36880.1 (+1)	MAT3 - methionine adenosyltransferase 3	42	133.41	92.383	87.501	18.498	0	0	101.33	113.35	14.304	0	0	0
AT1G15750.1 (+3)	WSIP1, TPL - Transducin family protein / WD-40 repeat family protein	124	0	0	0	77.579	75.706	61.486	0	0	0	87.447	35.298	45.996
AT3G10850.1	GLX2-2, GLY2 - Metallo-hydrolase/oxidoreductase superfamily protein	29	77.004	88.241	94.375	0	0	0	0	57.602	6.2092	0	0	0
AT5G53480.1	ARM repeat superfamily protein	96	0	0	0	99.528	58.092	76.885	20.3	0	0	43.202	4.8863	55.272
AT5G04800.1 (+3)	Ribosomal S17 family protein	16	50.627	39.501	26.888	71.569	69.933	59.689	0	1.9232	0	0	0	0
AT3G01480.1	CYP38, ATCYP38 - cyclophilin 38	48	80.803	84.466	71.296	0	0	0	28.022	38.069	39.432	0	0	0
AT2G37220.1	RNA-binding (RRM/RBD/RNP motifs) family protein	31	49.749	51.052	60.277	24.169	16.555	14.472	27.923	36.849	62.956	0	0	0
AT1G32200.1 (+1)	ATS1, ACT1 - phospholipid/glycerol acyltransferase family protein	50	66.484	78.281	96.644	0	0	0	27.22	30.615	43.095	0	0	0
AT4G09000.1 (+1)	GRF1, GF14 CHI - general regulatory factor 1	30	0	0	0	29.313	8.046	10.835	90.757	7.6443	33.558	46.273	50.391	78.738
AT2G30860.1	ATGSTF9, GLUTTR, ATGSTF7, GSTF9 - glutathione S-transferase PHI 9	24	70.628	56.428	44.543	1.7854	0	0	46.8	79.688	21.416	0	0	0
AT1G08420.1 (+1)	BSL2 - BRI1 suppressor 1 (BSU1)-like 2	109	12.386	12.317	20.417	79.523	66.221	73.258	0	0	0	12.973	20.58	36.147
AT2G20270.1	Thioredoxin superfamily protein	19	55.826	52.906	66.763	0	0	0	25.16	56.783	83.818	0	0	0
AT2G26570.1	WEB1 - Plant protein of unknown function (DUF827)	89	0	0	0	14.962	8.046	43.403	42.685	27.38	129.42	24.11	39.064	38.968
AT3G42170.1	BED zinc finger ;hAT family dimerisation domain	79	0	0	0	44.826	4.184	33.486	25.16	0	2.4678	91.917	70.297	114.71
AT1G12800.1	Nucleic acid-binding, OB-fold-like protein	86	0	0	0	84.463	93.978	86.663	2.7352	0	5.8162	37.091	10.005	8.3625
AT5G66040.1	STR16 - sulfurtransferase protein 16	13	72.535	72.032	78.674	1.7296	0	8.1404	7.1382	14.669	66.698	0	0	0
AT3G48730.1	GSA2 - glutamate-1-semialdehyde 2,1-aminomutase 2	50	29.216	27.199	27.795	0	0	0	106.57	67.724	40.069	0	0	0
AT5G47210.1	Hyaluronan / mRNA binding family	38	45.131	33.761	55.991	49.184	63.25	44.341	0	0	40.821	0	0	0
ATCG00900.1 (+1)	RPS7.1, RPS7 - Ribosomal protein S7p/S5e family protein	17	39.493	36.097	44.657	55.3	86.799	70.575	0	0	0	0	0	0
AT1G51980.1	Insulinase (Peptidase family M16) protein	54	0	0	0	46.413	28.113	37.978	0	10.972	0	87.165	62.153	84.987
AT4G03080.1	BSL1 - BRI1 suppressor 1 (BSU1)-like 1	96	0	0	0	66.984	66.374	59.427	5.4849	40.492	0	51.686	38.099	20.586
AT3G48930.1	EMB1080 - Nucleic acid-binding, OB-fold-like protein	18	11.892	13.281	9.0781	69.204	85.782	64.202	0	47.062	0	0	0	0
AT2G01250.1	Ribosomal protein L30/L7 family protein	28	35.158	38.762	34.152	59.722	83.007	73.314	0	0	0	0	0	0
AT2G35050.1	Protein kinase superfamily protein with octicosapeptide/Phox/Bem1p domain	140	0	0	0	12.881	0	29.849	0	0	63.406	79.328	133.85	127.75
AT1G29660.1	GDSL-like Lipase/Acylhydrolase superfamily protein	40	0	0	0	133.1	104.65	93.957	0	0	0	0	0	0
AT2G32730.1	26S proteasome regulatory complex, non-ATPase subcomplex, Rpn2/Psmd1 subunit	109	11.44	0	0	39.978	45.411	28.06	19.561	22.342	58.313	41.24	59.553	27.282
AT3G02730.1	TRXF1, ATF1 - thioredoxin F-type 1	19	57.643	66.897	59.152	0	0	0	20.278	31.534	50.111	0	0	0
AT3G53990.1	Adenine nucleotide alpha hydrolases-like superfamily protein	18	34.634	33.439	36.086	46.536	43.091	42.379	0	19.421	38.015	28.135	0	2.3901
AT1G01100.1 (+2)	60S acidic ribosomal protein family	11	0	0	0	29.56	0	24.44	66.683	0	46.605	79.252	93.622	12.015
AT5G39830.1 (+1)	DEGP8, DEG8 - Trypsin family protein with PDZ domain	47	30.578	31.762	33.348	48.443	68.081	55.192	0	37.076	29.836	0	0	0
AT2G45820.1	Remorin family protein	21	12.499	8.8003	11.245	41.621	47.571	41.664	8.2273	13.033	43.14	28.122	53.379	57.492
AT3G58610.1 (+2)	ketol-acid reductoisomerase	64	26.594	25.6	22.296	13.841	16.555	7.2488	94.738	38.107	35.716	3.9453	0	6.0397
AT5G66760.1	SDH1-1 - succinate dehydrogenase 1-1	70	8.5729	0	0	24.302	46.64	43.403	16.147	32.944	0	34.066	101.99	82.55
AT2G44650.1	CHL-CPN10, CPN10 - chloroplast chaperonin 10	15	60.19	62.552	69.65	13.841	24.833	18.096	5.4849	26.219	52.676	0	0	0
AT1G70410.1 (+1)	ATBCA4, BCA4, CA4 - beta carbonic anhydrase 4	28	10.475	14.18	11.185	6.8159	15.676	0	27.116	26.367	19.381	63.297	111.71	72.99
AT3G53110.1	LOS4 - P-loop containing nucleoside triphosphate hydrolases superfamily protein	55	0	0	0	0	0	0	172.64	24.647	63.121	11.019	0	3.6496
AT4G00810.1 (+1)	60S acidic ribosomal protein family	11	0	0	0	13.791	0	13.562	95.573	0	29.554	76.318	32.571	13.253
AT4G10300.1	RmlC-like cupins superfamily protein	15	62.129	60.821	61.277	0	0	0	18.228	53.498	79.004	0	0	0
AT3G25530.1	GHBDH, ATGHBDH, GLYR1, GR1 - glyoxylate reductase 1	31	76.488	68.808	55.765	0	0	0	20.927	57.753	44.27	0	0	0
AT3G14930.1 (+1)	HEME1 - Uroporphyrinogen decarboxylase	46	54.502	52.874	61.277	0	0	0	42.641	73.205	38.244	0	0	0
AT4G24930.1	thylakoid lumenal 17.9 kDa protein, chloroplast	25	0	0	0	72.612	63.014	80.425	0	21.875	44.296	27.113	0	10.523
AT5G09620.1	Octicosapeptide/Phox/Bem1p family protein	60	0	0	0	5.7916	28.856	30.671	48.123	49.194	114.34	57.075	61.194	24.094
AT5G11670.1	ATNADP-ME2, NADP-ME2 - NADP-malic enzyme 2	64	87.304	66.886	24.969	0	0	0	42.851	51.311	36.956	0	0	0
AT3G13470.1	TCP-1/cpn60 chaperonin family protein	63	438.19	425.37	451.75	213.42	231.28	241.26	292.18	367.99	350.18	281.91	36.981	327.75
AT1G80380.2 (+2)	P-loop containing nucleoside triphosphate hydrolases superfamily protein	51	7.1684	14.107	14.864	13.841	8.046	10.835	63.907	21.824	9.5362	44.196	64.264	75.864
AT2G17390.1	AKR2B - ankyrin repeat-containing 2B	37	0	0	0	1.7854	18.549	23.552	85.365	4.5288	134.34	0	36.588	0
AT5G14260.1 (+2)	Rubisco methyltransferase family protein	58	0	0	0	41.523	41.388	42.52	54.376	27.32	27.404	49.216	3.262	13.168
AT1G78830.1	Curculin-like (mannose-binding) lectin family protein	50	33.991	44.114	50.16	0	0	0	21.718	67.654	120.77	0	0	0
AT1G14650.1 (+1)	SWAP (Suppressor-of-White-APricot)/surp domain-containing protein / ubiquitin family protein	88	0	0	0	14.571	23.97	26.216	37.142	8.7906	55.176	32.147	62.988	112.26
AT5G58140.1 (+2)	PHOT2, NPL1 - phototropin 2	102	0	7.0449	7.4967	41.314	46.459	40.684	12.88	19.421	20.358	44.166	35.147	51.735
AT1G50200.1	ALATS, ACD - Alanyl-tRNA synthetase	110	37.705	52.001	16.831	0	0	0	78.634	49.194	64.7	0	0	0
AT3G52200.1	LTA3 - Dihydrolipoamide acetyltransferase, long form protein	69	0	0	0	80.355	90.237	99.401	0	8.689	0	22.138	0	0
AT3G48990.1	AMP-dependent synthetase and ligase family protein	56	50.818	51.17	50.244	0	0	0	51.146	60.097	45.61	0	0	0
AT2G04700.1	ferredoxin thioredoxin reductase catalytic beta chain family protein	16	65.417	56.224	60.165	0	0	0	17.461	27.061	97.567	0	0	0
ATCG00790.1	RPL16 - ribosomal protein L16	15	33.817	29.861	34.026	63.137	60.418	75.847	0	0	0	0	0	0
AT4G39200.1 (+1)	Ribosomal protein S25 family protein	12	43.948	37.041	60.402	39.872	58.94	65.985	0	0	0	0	0	0
AT3G05560.1 (+2)	Ribosomal L22e protein family	14	26.664	45.795	57.498	24.274	19.532	10.873	22.538	47.984	13.171	0	16.445	0
AT1G14980.1	CPN10 - chaperonin 10	11	53.301	71.44	84.621	13.841	28.856	28.957	0	0	28.745	0	0	0
AT4G01800.1 (+1)	AGY1, AtcpSecA, SECA1 - Albino or Glassy Yellow 1	115	0	0	0	58.772	41.388	31.633	22.381	0	0	63.311	61.282	77.199
AT2G21660.1	ATGRP7, CCR2, GR-RBP7, GRP7 - cold, circadian rhythm, and rna binding 2	17	76.711	58.017	57.406	6.8159	16.555	14.472	0	28.16	45.343	0	0	0
AT1G23490.1 (+3)	ATARFA1A, ATARF1, ATARF, ARF1 - ADP-ribosylation factor 1	21	0	0	0	36.081	54.242	50.452	37.557	8.689	33.473	43.821	36.093	7.2347
AT4G05150.1	Octicosapeptide/Phox/Bem1p family protein	53	0	0	0	19.089	21.807	19.893	49.066	0	58.422	48.208	82.368	59.976
AT5G60600.1	GCPE, ISPG, CSB3, CLB4, HDS - 4-hydroxy-3-methylbut-2-enyl diphosphate synthase	82	42.613	59.055	41.639	0	0	0	76.814	43.699	14.441	0	0	0
AT2G37500.1	arginine biosynthesis protein ArgJ family	49	57.214	69.553	73.163	0	0	0	0	20.673	95.604	0	0	0
AT1G02500.1 (+1)	SAM1, SAM-1, MAT1, AtSAM1 - S-adenosylmethionine synthetase 1	43	165.48	146.13	144.05	0	0	0	49.109	63.452	0	0	0	0
AT4G21105.1	cytochrome-c oxidases;electron carriers	8	0	0	0	39.328	97.152	128.82	0	0	0	26.707	0	0
AT5G20630.1	GLP3, GLP3A, GLP3B, ATGER3, GER3 - germin 3	22	8.5224	25.546	12.92	0	19.94	23.497	16.075	13.614	65.864	0	9.9847	0
AT1G30120.1	PDH-E1 BETA - pyruvate dehydrogenase E1 beta	44	0	0	0	66.505	68.678	73.302	9.7133	0	0	50.254	12.562	8.4083
AT3G53420.1 (+1)	PIP2A, PIP2, PIP2;1 - plasma membrane intrinsic protein 2A	30	0	0	0	51.182	68.317	40.684	27.143	0	0	0	0	0
AT5G47870.1	unknown protein	21	0	0	0	69.204	79.287	61.503	0	0	9.5362	36.159	36.087	38.761
AT2G30930.1	unknown protein	17	23.796	31.745	22.296	39.921	33.11	34.346	0	17.48	38.372	7.3144	60.115	12.451
AT1G17220.1	FUG1 - Translation initiation factor 2, small GTP-binding protein	110	0	2.6878	11.051	76.916	45.644	51.484	5.4849	22.804	0	16.073	0	0
AT4G09320.1	NDPK1 - Nucleoside diphosphate kinase family protein	19	29.82	31.737	28.756	17.353	20.578	21.708	23.118	96.138	39.521	0	0	0
AT1G11720.1 (+1)	ATSS3, SS3 - starch synthase 3	119	0	0	0	66.401	31.179	31.664	11.364	0	0	53.162	75.586	80.328
AT5G58290.1	RPT3 - regulatory particle triple-A ATPase 3	46	0	0	0	88.376	61.262	70.481	0	0	0	26.187	12.633	38.761
AT3G07110.1 (+1)	Ribosomal protein L13 family protein	23	35.151	27.279	30.674	74.984	61.575	59.535	0	0	0	0	0	0
ATCG00770.1	RPS8 - ribosomal protein S8	15	0	14.107	11.051	64.906	69.038	57.888	0	0	0	28.135	25.195	25.841
AT2G42600.1 (+1)	ATPPC2, PPC2 - phosphoenolpyruvate carboxylase 2	110	11.569	11.523	0	0	0	0	156.96	6.0658	31.768	0	0	0
AT3G01390.1 (+1)	VMA10, AVMA10 - vacuolar membrane ATPase 10	12	31.507	32.605	27.883	62.955	43.339	75.953	0	0	0	0	0	0
AT2G33040.1	ATP3 - gamma subunit of Mt ATP synthase	35	0	0	0	47.271	32.879	55.194	0	0	0	84.392	6.3534	30.622
AT2G03440.1	NRP1, ATNRP1 - nodulin-related protein 1	20	64.145	54.51	69.474	26.614	0	18.082	0	2.2195	23.931	0	0	0
AT4G33680.1	AGD2 - Pyridoxal phosphate (PLP)-dependent transferases superfamily protein	50	75.505	53.704	28.805	0	0	0	48.946	35.667	39.432	0	0	0
AT3G54660.1	GR, EMB2360, ATGR2 - glutathione reductase	61	60.746	53.761	67.748	0	0	0	41.367	45.589	9.6271	0	0	0
AT5G62790.1	DXR, PDE129 - 1-deoxy-D-xylulose 5-phosphate reductoisomerase	52	37.934	46.773	38.083	0	0	0	64.667	54.497	38.326	0	0	0
AT5G55220.1	trigger factor type chaperone family protein	62	0	0	0	59.551	39.391	38.85	62.178	0	0	13.066	0	28.021
AT2G17870.1	ATCSP3, CSP3 - cold shock domain protein 3	30	24.025	21.087	34.336	27.682	34.39	28.931	17.633	0	10.731	34.112	32.752	18.339
AT5G49360.1	BXL1, ATBXL1 - beta-xylosidase 1	84	44.386	32.598	11.947	45.035	18.321	30.721	0	18.648	0	37.167	39.422	2.3901
AT2G39730.2	RCA - rubisco activase	49	0	0	97.67	225.33	964.87	1984.9	0	0	0	2233.2	2156.2	1580.5
AT2G24020.1 (+1)	Uncharacterised BCR, YbaB family COG0718	20	24.827	22.024	29.729	51.956	62.429	57.041	0	0	33.558	0	0	0
AT1G74050.1 (+1)	Ribosomal protein L6 family protein	26	0	17.63	26.045	69.943	80.965	70.438	0	0	0	0	0	0
AT5G19770.1 (+1)	TUA3 - tubulin alpha-3	50	0	0	0	79.504	92.169	43.493	26.459	0	0	339.26	405.89	414.39
AT4G14540.1	NF-YB3 - nuclear factor Y, subunit B3	17	0	0	0	0	0	0	23.969	39.354	63.498	41.176	51.697	96.626
AT4G11420.1	EIF3A, ATEIF3A-1, EIF3A-1, ATTIF3A1, TIF3A1 - eukaryotic translation initiation factor 3A	114	0	0	1.8902	45.091	59.005	62.412	8.5862	62.162	0	3.1232	10.159	15.503
AT1G19670.1	ATCLH1, CORI1, ATHCOR1, CLH1 - chlorophyllase 1	35	0	0	0	54.162	81.86	60.515	0	0	0	33.098	5.1117	51.786
AT4G19170.1	NCED4, CCD4 - nine-cis-epoxycarotenoid dioxygenase 4	66	0	0	0	38.903	37.365	47.04	0	0	0	65.404	68.874	87.069
AT3G55760.1 (+2)	unknown protein	66	0	0	0	59.664	51.806	66.057	0	0	0	31.092	55.352	22.257
AT3G15640.1 (+1)	Rubredoxin-like superfamily protein	19	0	0	14.864	49.069	73.837	58.553	13.888	0	18.839	19.029	0	0
AT3G48000.1	ALDH2B4, ALDH2, ALDH2A - aldehyde dehydrogenase 2B4	59	38.333	59.076	39.924	0	0	0	48.89	51.518	19.383	0	0	0
AT1G16080.1	unknown protein	34	15.612	0	14.864	0	0	0	69.481	71.859	101.64	0	0	0
AT5G16840.1 (+2)	BPA1 - binding partner of acd11 1	27	7.627	14.107	7.4967	55.468	59.172	68.748	0	17.48	43.095	0	0	0
AT1G35680.1	Ribosomal protein L21	24	38.226	33.533	37.161	43.929	50.945	39.804	0	16.412	0	0	0	0
AT1G33120.1 (+1)	Ribosomal protein L6 family	22	32.946	44.059	35.25	58.772	47.323	32.568	0	13.033	0	0	0	0
AT1G08830.1 (+1)	CSD1 - copper/zinc superoxide dismutase 1	15	58.852	70.631	81.706	0	0	0	0	46.925	63.526	0	0	0
AT1G32220.1	NAD(P)-binding Rossmann-fold superfamily protein	32	0	0	0	56.89	17.018	41.545	0	0	0	65.066	33.136	110.07
AT4G37910.1	mtHsc70-1 - mitochondrial heat shock protein 70-1	73	24.618	31.745	33.477	39.683	58.53	65.137	5.7241	38.038	76.418	0	0	0
AT2G47510.1 (+1)	FUM1 - fumarase 1	53	158.3	150.53	166.88	0	0	0	0	128.23	58.33	0	0	0
AT1G62740.1	Hop2 - stress-inducible protein, putative	65	54.166	51.059	70.423	0	0	0	11.209	30.615	57.422	0	0	0
AT5G57870.1	eIFiso4G1 - MIF4G domain-containing protein / MA3 domain-containing protein	86	0	0	22.296	45.751	42.14	24.44	0	17.48	0	38.124	35.293	48.114
AT3G57890.1 (+1)	Tubulin binding cofactor C domain-containing protein	63	0	0	0	46.6	41.156	42.526	5.7241	0	0	49.27	42.368	65.005
AT3G03780.1 (+2)	ATMS2, MS2 - methionine synthase 2	85	200.29	200.17	75.532	0	0	0	247.27	206.81	24.837	0	0	0
AT3G51890.1	Clathrin light chain protein	29	0	0	0	23.172	19.735	28.952	22.418	8.689	35.852	38.203	56.327	60.598
AT5G13120.2 (+1)	CYP20-2 - cyclophilin 20-2	28	70.254	68.673	63.103	0	0	0	0	36.059	14.304	0	0	0
AT5G13450.1	ATP5 - delta subunit of Mt ATP synthase	26	0	0	0	54.451	53.689	54.164	0	18.635	21.505	16.073	0	12.816
AT1G51100.1	unknown protein	24	18.38	15.034	18.548	31.984	45.411	28.895	8.9118	5.7496	33.558	12.074	59.651	0
AT2G45710.1 (+1)	Zinc-binding ribosomal protein family protein	9	7.627	0	7.4967	33.71	37.133	39.804	0	44.678	43.095	8.0494	0	0
AT1G58380.1 (+3)	XW6 - Ribosomal protein S5 family protein	31	96.628	67.403	91.065	106.52	138.74	117.61	0	35.883	0	0	0	0
AT3G13920.1	EIF4A1, RH4, TIF4A1 - eukaryotic translation initiation factor 4A1	47	0	0	0	42.308	31.833	14.415	44.643	0	2.473	39.917	0	80.948
AT5G18100.1	CSD3 - copper/zinc superoxide dismutase 3	17	66.579	57.259	83.515	0	0	0	0	17.48	38.252	0	0	0
AT4G29350.1	PFN2, PRO2, PRF2 - profilin 2	14	58.034	58.872	60.938	0	0	0	5.7241	27.181	48.743	0	0	0
AT3G23920.1	BAM1, BMY7, TR-BAMY - beta-amylase 1	64	0	0	0	52.892	44.336	42.582	0	6.7932	0	36.172	50.391	33.241
AT3G13235.1 (+2)	ubiquitin family protein	45	0	0	0	51.961	90.008	76.826	5.7241	0	9.5362	8.0494	0	0
AT5G51820.1	PGM, ATPGMP, PGM1, STF1 - phosphoglucomutase	68	18.374	14.124	11.051	0	0	0	108.92	34.811	39.424	0	0	0
AT5G61170.1	Ribosomal protein S19e family protein	16	14.795	25.582	25.903	55.184	40.274	55.147	5.4849	25.042	0	0	0	0
AT5G53490.1 (+2)	Tetratricopeptide repeat (TPR)-like superfamily protein	26	18.38	10.593	20.314	6.8159	12.764	14.472	35.524	39.196	102.46	0	0	0
AT1G31812.1	ACBP6, ACBP - acyl-CoA-binding protein 6	10	50.833	58.202	67.644	0	0	0	0	0	63.363	0	0	0
AT1G15930.1 (+1)	Ribosomal protein L7Ae/L30e/S12e/Gadd45 family protein	15	0	10.567	7.3676	33.71	34.107	31.627	13.951	39.304	62.258	10.163	0	0
AT4G14040.1	EDA38, SBP2 - selenium-binding protein 2	54	37.881	36.952	35.147	0	0	0	43.547	44.646	35.983	0	0	0
AT1G09210.1	CRT1b, AtCRT1b - calreticulin 1b	48	0	0	0	0	0	0	0	0	0	161.45	156.37	154.97
AT4G38630.1	RPN10, MCB1, ATMCB1, MBP1 - regulatory particle non-ATPase 10	41	18.38	0	18.548	37.057	39.235	38.925	19.556	0	0	28.135	21.796	0
AT1G75690.1	DnaJ/Hsp40 cysteine-rich domain superfamily protein	16	14.795	14.107	18.613	42.387	45.643	50.564	0	17.48	35.89	10.043	0	0
AT3G53460.1 (+2)	CP29 - chloroplast RNA-binding protein 29	36	30.537	46.707	37.966	17.353	16.555	15.327	35.704	17.48	31.044	0	0	0
AT1G65960.2	GAD2 - glutamate decarboxylase 2	56	1.7726	27.299	7.5238	0	0	1.785	80.015	31.576	21.366	8.0241	0	2.4331
AT5G62690.1 (+1)	TUB2 - tubulin beta chain 2	51	0	0	0	125.18	90.779	74.194	0	0	0	224.31	161.27	162.5
AT1G17650.1	GLYR2, GR2 - glyoxylate reductase 2	38	44.386	49.366	49.2	0	0	0	27.903	51.334	33.513	0	0	0
AT2G47730.1	ATGSTF8, ATGSTF5, GST6, GSTF8 - glutathione S-transferase phi 8	29	56.262	40.524	32.524	0	0	0	8.1792	101.41	64.573	0	0	0
AT1G10760.1	SEX1, SOP1, SOP, GWD1, GWD - Pyruvate phosphate dikinase, PEP/pyruvate binding domain	157	0	0	0	0	0	0	146.73	39.354	27.503	0	0	0
AT5G18380.1 (+2)	Ribosomal protein S5 domain 2-like superfamily protein	17	1.86	3.5903	4.7502	38.879	40.365	60.64	2.9064	54.657	4.9408	5.1951	0	3.5435
AT5G53460.1 (+2)	GLT1 - NADH-dependent glutamate synthase 1	242	11.44	22.7	18.548	0	0	0	95.924	54.551	23.977	0	0	0
AT2G30060.1	Pleckstrin homology (PH) domain superfamily protein	24	0	0	29.729	0	0	0	107.63	62.538	175.44	0	0	0
AT1G12840.1	DET3, ATVHA-C - vacuolar ATP synthase subunit C (VATC) / V-ATPase C subunit / vacuolar proton pump C subunit (DET3)	43	11.44	0	0	66.48	39.688	11.815	22.418	0	0	32.134	11.916	25.841
AT2G31610.1	Ribosomal protein S3 family protein	28	0	0	0	39.809	66.221	56.946	22.298	30.564	0	16.073	0	0
AT2G21530.1	SMAD/FHA domain-containing protein	23	52.6	60.855	55.724	0	0	0	7.5116	0	43.14	0	0	0
AT4G27000.1	ATRBP45C - RNA-binding (RRM/RBD/RNP motifs) family protein	45	0	0	0	59.448	100.56	73.322	0	0	0	0	0	0
AT3G11830.1 (+1)	TCP-1/cpn60 chaperonin family protein	60	22.193	8.7889	0	18.218	24.601	25.332	28.525	78.658	25.172	0	0	0
AT2G35040.1 (+1)	AICARFT/IMPCHase bienzyme family protein	65	43.148	36.144	60.38	0	0	0	30.169	71.605	0	0	0	0
AT1G73110.1	P-loop containing nucleoside triphosphate hydrolases superfamily protein	48	7.627	8.7889	0	79.664	73.123	67.805	0	0	0	0	0	0
AT2G20260.1	PSAE-2 - photosystem I subunit E-2	15	48.943	31.745	42.599	6.2322	4.1831	8.1905	0	35.01	38.281	0	0	0
AT4G02450.1 (+1)	HSP20-like chaperones superfamily protein	25	0	0	0	0	0	0	90.277	27.278	43.148	21.095	28.455	38.865
AT2G34640.1	PTAC12, HMR - plastid transcriptionally active 12	61	0	0	0	0	0	0	0	0	0	68.364	144.55	115.01
AT4G03280.2	PETC, PGR1 - photosynthetic electron transfer C	23	22.193	22.06	22.296	24.169	34.225	28.944	0	0	55.064	22.045	0	0
AT5G08530.1	CI51 - 51 kDa subunit of complex I	53	0	0	0	39.688	43.299	25.332	0	13.186	0	57.265	30.086	38.656
AT5G16620.1	PDE120, TIC40, ATTIC40 - hydroxyproline-rich glycoprotein family protein	49	18.38	0	0	45.849	49.897	66.016	0	0	0	0	27.168	0
ATCG00330.1	RPS14 - chloroplast ribosomal protein S14	12	24.089	26.369	29.568	29.335	36.14	36.938	0	0	0	12.074	22.761	24.339
AT2G21390.1	Coatomer, alpha subunit	136	0	0	0	24.955	8.5092	14.472	0	0	0	71.004	82.956	93.712
AT2G23120.1	Late embryogenesis abundant protein, group 6	8	87.886	70.408	78.036	0	0	0	0	0	0	0	0	0
AT2G14720.1 (+1)	VSR4, VSR2;1, BP80-2;1, MTV4 - vacuolar sorting receptor 4	70	0	0	0	34.498	38.413	37.097	5.4849	17.48	26.269	38.146	30.716	34.765
AT5G28060.1	Ribosomal protein S24e family protein	15	33.404	49.366	48.277	31.982	43.548	32.568	0	0	0	0	0	0
AT5G22800.1	EMB86, EMB1030, EMB263 - Alanyl-tRNA synthetase, class IIc	108	0	0	0	0	0	0	133.26	40.26	23.977	0	0	0
AT3G56130.1 (+1)	biotin/lipoyl attachment domain-containing protein	30	0	3.5371	11.245	68.182	60.449	65.969	0	0	0	0	0	0
AT1G53580.1	GLX2-3, ETHE1, GLY3 - glyoxalase II 3	32	61.162	60.768	76.19	0	0	0	0	12.258	19.104	0	0	0
AT4G02530.1	chloroplast thylakoid lumen protein	24	25.777	31.737	26.941	22.519	8.046	8.1193	26.663	34.959	49.064	0	0	0
AT1G29900.1	CARB - carbamoyl phosphate synthetase B	130	7.1684	23.765	0	0	0	0	108.38	32.505	28.79	0	0	2.3901
AT1G47260.1	APFI, GAMMA CA2 - gamma carbonic anhydrase 2	30	30.178	34.341	29.626	37.202	30.025	37.053	0	0	0	0	0	0
AT3G63410.1	APG1, VTE3, IEP37, E37 - S-adenosyl-L-methionine-dependent methyltransferases superfamily protein	38	0	0	0	45.947	50.94	27.988	0	0	0	44.183	43.639	56.995
AT1G17880.1	BTF3, ATBTF3 - basic transcription factor 3	18	37.705	36.129	33.477	0	0	0	47.565	38.971	92.76	0	0	0
AT5G10860.1	Cystathionine beta-synthase (CBS) family protein	23	58.153	68.582	76.651	0	0	0	0	0	25.029	0	0	0
AT2G21620.1	RD2 - Adenine nucleotide alpha hydrolases-like superfamily protein	21	15.128	10.456	14.864	27.682	34.107	29.791	0	43.284	38.326	0	0	0
AT1G19570.1 (+1)	DHAR1, ATDHAR1, DHAR5 - dehydroascorbate reductase	24	49.145	25.555	26.904	0	0	0	41.88	61.128	27.652	0	0	0
AT1G64790.1 (+1)	ILA - ILITYHIA	285	0	0	0	25.281	16.092	29.886	0	0	0	59.227	86.409	90.593
AT4G28750.1	PSAE-1 - Photosystem I reaction centre subunit IV / PsaE protein	15	33.021	57.258	57.547	18.245	17.543	0	0	0	0	0	0	0
AT2G31810.1	ACT domain-containing small subunit of acetolactate synthase protein	54	0	0	0	63.27	62.198	60.582	0	13.186	0	8.0494	0	25.841
AT1G11750.2 (+1)	CLPP6 - CLP protease proteolytic subunit 6	31	0	0	0	39.415	42.069	36.889	0	0	0	70.158	13.436	41.717
AT2G04842.1	EMB2761 - threonyl-tRNA synthetase, putative / threonine--tRNA ligase, putative	75	26.729	11.5	8.2636	24.065	0	9.8652	33.627	26.219	10.631	23.199	3.2576	13.272
AT2G24820.1	TIC55-II - translocon at the inner envelope membrane of chloroplasts 55-II	61	0	0	0	24.169	24.833	25.32	0	0	0	61.274	75.621	98.638
AT5G52840.1	NADH-ubiquinone oxidoreductase-related	19	0	0	0	43.309	52.806	43.403	11.209	0	0	24.11	44.11	51.681
AT4G29160.1 (+1)	SNF7.1 - SNF7 family protein	24	0	0	7.4967	0	0	0	60.329	40.833	122.72	0	0	0
AT1G64190.1	6-phosphogluconate dehydrogenase family protein	53	31.658	29.077	20.604	0	0	0	51.953	52.818	30.948	0	0	0
AT3G05900.1	neurofilament protein-related	73	0	0	1.9149	0	0	0	56.258	25.226	100.67	0	0	0
AT5G58330.1	lactate/malate dehydrogenase family protein	48	18.38	17.63	7.4967	0	0	0	86.829	17.48	28.745	0	0	0
AT4G35260.1	IDH1, IDH-I - isocitrate dehydrogenase 1	40	0	7.0449	0	46.812	46.462	41.606	11.209	0	0	13.093	0	0
AT5G01650.1	Tautomerase/MIF superfamily protein	12	41.602	38.799	34.373	19.054	0	5.5593	19.675	18.441	29.985	0	0	0
AT4G18100.1	Ribosomal protein L32e	16	25.868	31.737	21.93	34.576	43.346	48.812	0	0	0	0	0	0
AT1G43670.1	Inositol monophosphatase family protein	37	10.753	5.2029	0	0	0	0	92.727	53.114	28.745	0	0	0
AT5G20890.1	TCP-1/cpn60 chaperonin family protein	57	23.368	12.366	8.4542	10.537	1.9941	15.368	37.729	84.977	0	0	0	0
AT5G56710.1	Ribosomal protein L31e family protein	14	0	0	0	0	17.018	0	1.4225	0	0	7.9228	0	0
AT3G58140.1	phenylalanyl-tRNA synthetase class IIc family protein	49	25.777	32.672	29.729	0	0	0	41.346	43.699	38.372	0	0	0
AT5G63310.1	NDPK2, NDPK1A, NDPK IA IA, NDPK IA, ATNDPK2 - nucleoside diphosphate kinase 2	26	25.003	52.9	52.071	0	0	0	15.198	37.076	44.238	0	0	0
AT5G54960.1	PDC2 - pyruvate decarboxylase-2	66	0	0	0	69.122	51.074	39.794	0	0	0	39.175	0	26.239
ATCG00500.1	ACCD - acetyl-CoA carboxylase carboxyl transferase subunit beta	56	0	0	0	60.573	29.904	37.952	6.3963	0	0	41.166	12.562	35.266
AT1G16720.1	HCF173 - high chlorophyll fluorescence phenotype 173	66	0	0	0	41.523	33.11	39.792	0	0	0	44.196	52.057	58.089
AT4G39260.1	CCR1, ATGRP8, GR-RBP8, GRP8 - cold, circadian rhythm, and RNA binding 1	17	77.561	67.013	59.522	0	0	0	0	35.01	57.49	0	0	0
ATCG00380.1	RPS4 - chloroplast ribosomal protein S4	23	0	0	0	43.015	39.179	49.692	0	0	0	28.135	31.512	51.681
AT5G02960.1	Ribosomal protein S12/S23 family protein	16	54.395	60.812	60.445	7.0249	0	8.179	0	0	0	0	0	0
AT3G59970.3	MTHFR1 - methylenetetrahydrofolate reductase 1	66	7.1684	19.327	0	0	0	0	72.135	21.722	10.77	31.09	0	0
AT1G66240.1	ATX1, ATATX1 - homolog of anti-oxidant 1	11	41.031	34.261	45.057	0	0	0	7.5116	40.912	58.284	0	0	0
AT1G30690.1 (+1)	Sec14p-like phosphatidylinositol transfer family protein	61	0	0	0	0	0	0	108.99	8.7906	65.847	0	0	0
AT5G28540.1	BIP1 - heat shock protein 70 (Hsp 70) family protein	74	0	0	72.142	0	0	76.075	327.04	196.39	251.82	176.82	188.18	222.57
AT5G63890.2 (+1)	ATHDH, HISN8, HDH - histidinol dehydrogenase	50	53.872	44.917	40.845	0	0	0	25.16	21.976	18.988	0	0	0
AT2G02160.1	CCCH-type zinc finger family protein	76	0	0	0	0	1.9941	1.8345	0	0	0	38.144	133.48	135.14
AT1G63770.3 (+1)	Peptidase M1 family protein	111	1.8919	7.0622	0	0	0	0	148.05	0	0	0	0	0
AT4G33500.1	Protein phosphatase 2C family protein	79	1.7726	0	7.3676	45.849	45.179	32.568	5.7241	17.48	16.624	0	37.793	0
AT1G04080.1 (+1)	PRP39 - Tetratricopeptide repeat (TPR)-like superfamily protein	85	0	0	0	30.985	37.365	10.873	0	0	0	55.279	65.911	68.208
AT1G17100.1	SOUL heme-binding family protein	25	0	0	0	45.719	37.133	32.568	25.28	30.564	23.977	6.9306	0	0
AT5G23120.1	HCF136 - photosystem II stability/assembly factor, chloroplast (HCF136)	44	32.946	41.386	25.98	0	0	0	47.459	26.169	9.5362	0	0	0
AT4G39330.1	ATCAD9, CAD9 - cinnamyl alcohol dehydrogenase 9	39	28.454	43.229	24.111	0	0	0	28.645	73	19.163	0	0	0
AT4G09010.1	APX4, TL29 - ascorbate peroxidase 4	38	51.954	31.745	8.2374	0	0	0	34.708	66.295	10.634	0	0	0
AT4G12420.1 (+1)	SKU5 - Cupredoxin superfamily protein	66	0	7.0449	0	0	0	0	30.137	54.727	49.105	16.073	0	32.248
AT3G25520.1	ATL5, PGY3, OLI5, RPL5A - ribosomal protein L5	34	0	0	0	28.1	0	0	0	0	0	254.25	563.76	500.05
AT1G55860.1 (+1)	UPL1 - ubiquitin-protein ligase 1	433	0	0	0	14.706	0	1.785	0	0	0	72.378	104.04	80.092
AT2G28900.1	OEP16, ATOEP16-L, ATOEP16-1, OEP16-1 - outer plastid envelope protein 16-1	15	13.385	12.129	28.757	17.353	8.5092	0	5.4849	0	0	51.184	26.826	61.408
ATCG00750.1	RPS11 - ribosomal protein S11	15	0	0	0	33.69	54.554	56.946	0	0	0	0	0	0
AT3G58730.1	vacuolar ATP synthase subunit D (VATD) / V-ATPase D subunit / vacuolar proton pump D subunit (VATPD)	29	0	0	0	48.548	31.888	8.1087	0	21.824	0	42.283	39.068	60.605
AT3G23490.1	CYN - cyanase	19	38.164	44.046	56.776	0	0	0	0	13.033	52.676	0	0	0
AT1G06190.2 (+1)	Rho termination factor	33	0	0	0	0	0	0	0	0	0	57.237	162.45	110
AT5G24165.1	unknown protein	8	26.007	36.197	37.069	0	29.97	44.25	0	0	0	0	0	0
AT4G22240.1	Plastid-lipid associated protein PAP / fibrillin family protein	34	0	0	0	53.691	37.365	61.512	0	0	0	24.11	39.528	51.576
AT3G12260.1	LYR family of Fe/S cluster biogenesis protein	15	15.526	6.2096	25.937	42.492	44.522	64.203	0	0	0	0	0	0
AT4G10480.1 (+1)	Nascent polypeptide-associated complex (NAC), alpha subunit family protein	23	0	0	0	0	0	0	81.244	10.493	49.788	26.072	6.3624	9.6248
AT2G40490.1	HEME2 - Uroporphyrinogen decarboxylase	44	48.137	37.847	22.275	0	0	0	42.385	26.219	17.819	0	0	0
AT1G12270.1	Hop1 - stress-inducible protein, putative	65	50.615	43.163	57.593	0	0	1.785	2.7185	23.784	40.73	0	0	0
AT3G49910.1	Translation protein SH3-like family protein	17	6.0822	14.124	12.817	38.01	41.156	44.333	0	34.908	0	0	0	0
AT1G62780.1	unknown protein	27	0	0	0	31.194	25.881	26.25	0	0	46.621	14.147	0	13.025
AT1G33590.1	Leucine-rich repeat (LRR) family protein	52	33.175	31.737	0	0	0	0	0	147.6	0	0	0	0
AT2G42740.1 (+4)	RPL16A - ribosomal protein large subunit 16A	21	16.542	10.593	18.548	31.866	30.022	14.472	0	48.043	9.5362	12.074	0	0
AT4G09040.1 (+1)	RNA-binding (RRM/RBD/RNP motifs) family protein	34	68.87	56.437	64.96	0	0	0	0	0	0	0	0	0
AT2G25450.1	2-oxoglutarate (2OG) and Fe(II)-dependent oxygenase superfamily protein	40	31.994	37.944	38.011	0	0	0	19.675	30.564	19.163	2.0719	0	0
AT4G15410.1	PUX5 - serine/threonine protein phosphatase 2A 55 kDa regulatory subunit B prime gamma	45	0	0	0	0	0	0	16.813	13.186	46.375	33.063	81.832	56.457
AT5G20990.1	B73, SIR4, CNX, CHL6, CNX1 - molybdopterin biosynthesis CNX1 protein / molybdenum cofactor biosynthesis enzyme CNX1 (CNX1)	71	0	1.7234	0	40.397	52.939	63.263	0	28.378	0	0	0	0
AT4G18240.1	ATSS4, SSIV, SS4 - starch synthase 4	118	0	0	0	35.324	21.748	25.32	2.6403	0	0	58.165	27.741	67.397
AT5G10450.1 (+3)	GRF6, AFT1, 14-3-3lambda - G-box regulating factor 6	28	0	0	0	37.906	33.817	14.472	73.487	0	0	9.0904	3.8256	45.974
AT5G55160.1	SUM2, SUMO 2, SUMO2, ATSUMO2 - small ubiquitin-like modifier 2	12	18.646	20.329	20.451	0	0	0	31.538	49.225	75.53	0	0	0
AT3G44620.1 (+1)	protein tyrosine phosphatases;protein tyrosine phosphatases	27	50.833	38.713	43.503	0	0	0	19.675	1.9589	45.343	0	0	0
AT3G24170.1 (+2)	ATGR1, GR1 - glutathione-disulfide reductase	54	26.007	24.588	22.296	0	0	0	30.645	82.341	0	0	0	0
AT1G79280.1 (+2)	NUA, AtTPR - nuclear pore anchor	237	0	0	0	0	0	0	0	0	0	64.242	83.607	101.14
AT2G03680.1 (+1)	SPR1, SKU6 - spiral1	12	14.795	15.845	16.679	32.797	46.408	36.18	0	0	0	1.9651	15.998	0
AT4G01900.1	PII, GLB1 - GLNB1 homolog	21	45.337	35.268	48.277	0	0	0	13.951	26.219	38.326	0	0	0
AT2G33210.1 (+1)	HSP60-2 - heat shock protein 60-2	62	88.332	99.56	90.08	0	0	0	41.974	74.993	24.938	0	0	0
AT5G41790.1	CIP1 - COP1-interactive protein 1	182	0	0	0	33.777	34.556	54.242	0	0	0	22.063	60.09	20.238
AT1G18500.1	MAML-4, IPMS1 - methylthioalkylmalate synthase-like 4	69	0	0	0	51.752	44.877	39.792	11.876	0	0	42.182	0	0
AT5G36700.1 (+5)	ATPGLP1, PGLP1 - 2-phosphoglycolate phosphatase 1	40	18.609	7.0449	0	0	0	0	100.1	8.7906	27.475	0	0	0
AT3G52380.1	CP33, PDE322 - chloroplast RNA-binding protein 33	36	0	0	0	0	0	0	0	0	0	87.42	108.39	86.377
AT1G20760.1	Calcium-binding EF hand family protein	110	0	0	0	0	0	0	6.9806	0	0	57.316	107.49	98.379
AT5G42390.1	Insulinase (Peptidase family M16) family protein	141	14.795	7.0449	14.864	20.761	8.5092	25.32	25.828	36.069	12.111	8.0241	0	0
AT1G12230.1 (+1)	Aldolase superfamily protein	44	0	0	0	33.899	48.32	53.346	16.813	0	0	16.073	0	0
AT4G16830.1	Hyaluronan / mRNA binding family	37	11.569	51.104	59.477	27.367	23.228	30.703	0	0	7.0875	0	0	0
AT1G20950.1	Phosphofructokinase family protein	67	0	0	0	12.164	30.787	30.767	26.06	29.122	21.366	27.985	0	0
AT5G64350.1	FKBP12, ATFKBP12 - FK506-binding protein 12	12	38.591	38.799	35.25	0	0	0	0	16.524	41.837	0	0	0
AT1G10670.1 (+2)	ACLA-1 - ATP-citrate lyase A-1	47	0	0	0	41.523	16.092	15.389	8.2273	0	0	52.245	31.512	53.435
AT1G36160.1 (+1)	ACC1, AT-ACC1, EMB22, GK, PAS3 - acetyl-CoA carboxylase 1	251	0	0	0	22.246	31.127	22.576	6.4242	0	0	69.328	0	62.914
AT4G01370.1	ATMPK4, MPK4 - MAP kinase 4	43	0	0	0	27.682	12.069	17.162	0	0	0	41.074	78.167	74.164
AT3G54210.1	Ribosomal protein L17 family protein	23	18.609	31.745	33.412	40.575	37.133	32.556	0	0	0	0	0	0
AT2G17200.1	DSK2 - ubiquitin family protein	58	0	0	0	47.531	75.904	62.323	0	0	0	0	0	0
AT4G31480.1 (+2)	Coatomer, beta subunit	106	0	0	0	18.984	16.724	19.812	0	0	0	51.255	39.552	73.446
AT2G34480.1	Ribosomal protein L18ae/LX family protein	21	0	7.0449	0	56.08	60.217	54.263	0	0	0	0	0	0
AT3G03710.1	RIF10, PNP - polyribonucleotide nucleotidyltransferase, putative	100	0	0	0	0	0	0	93.615	30.564	27.543	0	0	0
AT4G21660.2 (+1)	proline-rich spliceosome-associated (PSP) family protein	69	0	0	0	0	0	0	0	0	0	51.114	126.55	121.74
AT5G65750.1	2-oxoglutarate dehydrogenase, E1 component	116	0	0	0	98.404	66.986	45.128	0	0	0	100.35	32.674	59.295
AT1G73060.1	LPA3 - Low PSII Accumulation 3	40	0	0	0	37.2	13.115	3.5804	0	0	0	40.094	22.101	98.49
AT5G06600.1 (+1)	UBP12 - ubiquitin-specific protease 12	131	0	0	0	44.018	30.838	22.588	22.259	0	0	38.084	0	38.865
AT2G46280.1 (+1)	TRIP-1, TIF3I1 - TGF-beta receptor interacting protein 1	36	23.805	19.338	33.412	21.496	42.419	38.802	0	0	0	0	0	0
AT3G04840.1	Ribosomal protein S3Ae	30	19.425	0	7.4967	53.226	43.378	36.047	14.071	0	0	0	0	0
AT3G53020.1	STV1, RPL24B, RPL24 - Ribosomal protein L24e family protein	19	37.218	33.415	38.17	17.562	24.833	28.957	0	0	0	0	0	0
AT5G64040.1	PSAN - photosystem I reaction center subunit PSI-N, chloroplast, putative / PSI-N, putative (PSAN)	18	0	0	0	20.657	25.649	39.817	0	0	0	40.184	0	52.593
AT1G21750.1 (+1)	ATPDIL1-1, ATPDI5, PDI5, PDIL1-1 - PDI-like 1-1	56	14.795	7.0449	14.864	13.841	8.046	0	26.595	8.689	28.745	10.876	23.945	0
ATCG01060.1	PSAC - iron-sulfur cluster binding;electron carriers;4 iron, 4 sulfur cluster binding	9	0	0	0	20.761	33.11	28.931	0	0	20.4	36.215	25.195	25.841
AT5G13630.1 (+1)	GUN5, CCH, CHLH, CCH1, ABAR - magnesium-chelatase subunit chlH, chloroplast, putative / Mg-protoporphyrin IX chelatase, putative (CHLH)	154	0	0	0	43.373	20.578	32.556	40.591	0	0	32.147	0	0
AT3G56150.1 (+1)	EIF3C, ATEIF3C-1, EIF3C-1, ATTIF3C1, TIF3C1 - eukaryotic translation initiation factor 3C	103	0	0	0	5.2188	0	21.708	0	0	0	73.317	66.073	72.066
AT3G08030.1 (+1)	Protein of unknown function, DUF642	39	0	12.254	0	0	0	0	33.976	117.54	11.939	0	0	0
AT5G65620.1	Zincin-like metalloproteases family protein	89	14.795	7.0622	0	0	0	0	102.53	11.045	0	0	0	0
AT1G27950.1	LTPG1 - glycosylphosphatidylinositol-anchored lipid protein transfer 1	20	33.218	31.684	40.028	13.841	16.555	7.2488	5.4849	8.7906	20.365	0	0	0
AT1G07770.1 (+2)	RPS15A - ribosomal protein S15A	15	0	0	0	34.707	56.897	33.512	0	0	0	16.073	25.195	22.239
AT5G65410.1	ATHB25, ZFHD2, HB25, ZHD1 - homeobox protein 25	31	0	0	0	6.114	0	0	2.2259	3.9178	20.922	45.965	64.059	26.549
AT3G55330.1	PPL1 - PsbP-like protein 1	26	22.193	7.8043	35.17	0	0	0	15.866	56.834	52.516	0	0	0
AT1G64520.1	RPN12a - regulatory particle non-ATPase 12A	31	0	0	0	29.345	0	25.32	0	0	0	47.252	66.248	64.461
AT1G62020.1	Coatomer, alpha subunit	137	0	0	0	14.915	21.626	18.954	0	0	0	84.329	86.212	88.63
AT5G47190.1	Ribosomal protein L19 family protein	25	0	0	0	63.075	52.829	43.476	4.0535	17.48	0	0	0	0
AT3G13460.1	ECT2 - evolutionarily conserved C-terminal region 2	72	0	0	0	44.035	53.693	25.32	0	0	0	31.091	0	0
AT5G16880.1 (+1)	Target of Myb protein 1	45	0	0	0	41.446	18.549	33.435	31.65	0	0	37.248	0	11.777
AT5G02160.1	unknown protein	13	0	0	0	34.555	60.22	60.593	0	0	0	4.9127	0	0
AT4G28660.1 (+1)	PSB28 - photosystem II reaction center PSB28 protein	20	34.288	36.993	24.134	8.5846	16.555	14.472	0	20.53	25.032	0	0	0
AT1G47200.1	WPP2 - WPP domain protein 2	19	0	0	0	0	11.646	11.82	19.675	15.386	94.471	0	0	3.5435
AT4G12060.1	Double Clp-N motif protein	27	0	0	0	48.443	32.196	37.122	28.022	0	14.479	8.9608	0	0
AT1G66200.1	ATGSR2, GSR2, GLN1;2 - glutamine synthase clone F11	39	37.437	2.6976	0	0	0	0	102.17	10.143	25.698	20.784	0	0
AT5G45280.2	Pectinacetylesterase family protein	42	61.601	86.357	81.579	0	0	0	0	68.375	0	0	0	0
AT3G45030.1 (+2)	Ribosomal protein S10p/S20e family protein	14	25.041	29.151	31.752	20.761	29.951	29.863	0	0	0	0	0	0
AT1G29880.1	glycyl-tRNA synthetase / glycine--tRNA ligase	82	0	7.0449	7.3676	0	0	0	61.475	48.094	43.14	0	0	0
AT5G56360.1	PSL4 - calmodulin-binding protein	73	0	0	0	0	0	0	0	0	0	43.263	127.54	117.48
AT5G23140.1	CLPP2, NCLPP7 - nuclear-encoded CLP protease P7	26	23.951	35.252	38.083	7.0249	8.046	14.472	0	26.169	23.931	0	0	0
AT4G27090.1	Ribosomal protein L14	16	23.239	36.197	33.477	5.1745	8.046	18.096	0	62.118	0	0	0	0
AT2G30200.1	catalytics;transferases;[acyl-carrier-protein] S-malonyltransferases;binding	42	22.193	35.268	33.412	0	0	0	32.853	43.699	2.4837	0	0	0
AT5G08410.1	FTRA2 - ferredoxin/thioredoxin reductase subunit A (variable subunit) 2	20	41.673	35.237	35.331	0	0	0	5.4849	13.186	52.17	0	0	0
AT4G27500.1	PPI1 - proton pump interactor 1	69	0	0	0	21.731	7.3752	7.2232	4.2284	17.48	9.6271	28.122	56.672	50.096
AT4G34490.1	ATCAP1, CAP 1, CAP1 - cyclase associated protein 1	51	0	0	0	30.168	25.947	26.237	13.951	0	19.163	37.18	0	26.05
AT5G61780.1	Tudor2, AtTudor2, TSN2 - TUDOR-SN protein 2	108	14.795	7.0449	7.3676	0	0	0	50.521	58.845	2.4678	0	0	0
AT1G16880.1	uridylyltransferase-related	31	0	0	0	44.931	37.365	49.723	32.872	0	0	0	0	0
AT2G30170.1	Protein phosphatase 2C family protein	32	0	0	0	34.498	33.11	25.332	0	0	0	32.147	31.512	71.114
AT2G47610.1	Ribosomal protein L7Ae/L30e/S12e/Gadd45 family protein	29	0	0	30.837	115.67	131.82	123.01	0	4.508	0	0	0	0
AT2G20360.1	NAD(P)-binding Rossmann-fold superfamily protein	44	0	0	0	37.064	24.138	32.568	0	0	0	48.15	2.5414	15.312
AT3G19480.1	D-3-phosphoglycerate dehydrogenase	62	0	0	0	75.916	75.778	67.807	0	0	0	8.8911	0	8.4513
AT3G26740.1	CCL - CCR-like	15	8.9149	20.231	10.258	29.366	23.787	24.44	14.071	0	28.745	0	0	0
AT5G66140.1	PAD2 - proteasome alpha subunit D2	27	29.591	38.79	40.845	0	0	0	0	56.778	0	0	0	0
AT3G07630.1 (+1)	ADT2 - arogenate dehydratase 2	42	0	0	0	32.059	22.675	36.193	0	0	0	40.184	56.707	29.197
AT1G79870.1	D-isomer specific 2-hydroxyacid dehydrogenase family protein	34	31.179	29.924	32.425	0	0	0	33.866	36.059	0	0	0	0
AT2G05990.1 (+1)	MOD1, ENR1 - NAD(P)-binding Rossmann-fold superfamily protein	41	17.175	28.155	0	0	0	0	36.371	57.995	9.6271	0	0	0
ATCG01120.1	RPS15 - chloroplast ribosomal protein S15	11	0	0	0	61.419	57.292	39.792	0	0	0	0	0	0
AT5G50850.1	MAB1 - Transketolase family protein	39	0	0	0	15.726	17.67	21.721	30.884	0	23.977	20.098	0	2.3901
AT5G47700.1 (+1)	60S acidic ribosomal protein family	11	0	0	0	0	3.9881	0	53.131	0	0	59.172	11.454	6.0182
AT3G22110.1	PAC1 - 20S proteasome alpha subunit C1	27	47.328	49.375	42.632	0	0	0	0	13.186	0	0	0	0
AT1G65010.1	Plant protein of unknown function (DUF827)	153	0	0	0	20.657	20.578	27.098	0	0	21.6	42.079	44.237	23.845
AT1G43690.1	ubiquitin interaction motif-containing protein	65	0	0	0	19.849	16.555	25.332	0	0	0	43.197	70.585	58.292
AT1G78150.1 (+2)	unknown protein	30	1.86	14.107	11.051	30.985	57.946	48.805	0	0	0	0	0	0
AT1G78380.1	ATGSTU19, GST8, GSTU19 - glutathione S-transferase TAU 19	26	7.1684	5.2638	7.4967	0	0	0	51.601	26.219	28.699	0	0	0
AT3G27240.1	Cytochrome C1 family	34	0	0	0	49.203	38.362	28.944	0	0	0	25.102	2.5504	30.642
AT1G50250.1 (+1)	FTSH1 - FTSH protease 1	77	0	0	0	21.575	23.895	18.016	0	0	0	54.208	48.691	45.131
AT4G23600.1	CORI3, JR2 - Tyrosine transaminase family protein	47	15.741	35.268	0	0	0	0	63.764	0	19.254	0	0	0
AT1G09750.1	Eukaryotic aspartyl protease family protein	48	18.38	25.618	30.625	0	16.555	18.096	0	31.77	28.745	0	0	0
AT2G45540.1 (+1)	WD-40 repeat family protein / beige-related	322	0	0	0	20.866	16.555	24.378	0	0	0	56.048	44.065	44.26
AT3G13750.1	BGAL1 - beta galactosidase 1	94	0	0	0	27.682	0	18.989	0	0	0	58.118	56.742	47.537
AT4G32520.1 (+1)	SHM3, AtSHMT3 - serine hydroxymethyltransferase 3	58	64.912	45.844	53.962	0	0	0	0	0	0	0	0	0
AT3G07100.1	ERMO2, SEC24A - Sec23/Sec24 protein transport family protein	114	0	0	0	24.274	27.973	18.096	0	0	0	45.249	23.425	77.731
AT5G13650.2	elongation factor family protein	74	0	2.5851	14.864	0	0	0	62.373	26.815	35.866	0	0	2.3901
AT5G04590.1	SIR - sulfite reductase	72	34.921	26.383	6.3226	0	0	0	46.008	43.449	0	0	0	0
AT4G23100.1 (+1)	RML1, PAD2, GSH1, CAD2, ATECS1, GSHA - glutamate-cysteine ligase	59	16.438	23.787	5.422	0	0	0	78.864	3.5062	8.4076	0	0	0
AT2G47450.1	CAO, CPSRP43 - chloroplast signal recognition particle component (CAO)	41	0	0	0	7.5458	0	0	107.39	0	0	0	3.4127	0
AT5G26570.1	PWD, OK1, ATGWD3 - catalytics;carbohydrate kinases;phosphoglucan, water dikinases	131	10.753	17.612	0	0	0	0	55.09	34.959	19.163	0	0	0
AT5G13850.1	NACA3 - nascent polypeptide-associated complex subunit alpha-like protein 3	22	0	0	0	0	0	0	34.299	26.067	57.49	29.151	20.606	26.786
AT1G18070.1 (+2)	Translation elongation factor EF1A/initiation factor IF2gamma family protein	59	34.29	49.251	7.4967	0	0	0	32.212	16.363	13.239	0	0	0
AT5G47890.1	NADH-ubiquinone oxidoreductase B8 subunit, putative	11	0	14.107	18.613	23.371	28.856	22.563	0	0	0	11.995	39.457	3.4143
AT3G01910.1	SOX, AT-SO, AtSO - sulfite oxidase	43	40.909	21.985	29.729	0	0	0	7.8383	45.858	25.107	0	0	0
AT2G17120.1	LYM2 - lysm domain GPI-anchored protein 2 precursor	38	29.591	31.745	37.161	0	0	0	15.366	26.27	38.372	0	0	0
AT1G29910.1 (+2)	CAB3, AB180, LHCB1.2 - chlorophyll A/B binding protein 3	28	0	0	0	28.503	4.1764	23.485	9.7776	0	0	71.22	3.8256	12.637
AT1G42550.1	PMI1 - plastid movement impaired1	94	0	0	0	0	24.833	8.1413	0	0	0	37.164	82.139	64.405
AT3G11930.1 (+3)	Adenine nucleotide alpha hydrolases-like superfamily protein	21	0	0	0	25.283	35.617	22.309	0	0	0	47.574	33.674	45.131
AT3G15730.1	PLDALPHA1, PLD - phospholipase D alpha 1	92	0	0	0	39.637	2.0848	3.695	12.454	0	0	24.11	44.11	61.635
AT4G08920.1	CRY1, BLU1, HY4, OOP2, ATCRY1 - cryptochrome 1	77	0	0	0	32.889	2.0964	31.584	0	0	0	28.135	49.034	59.758
AT5G20080.1	FAD/NAD(P)-binding oxidoreductase	36	27.581	35.285	36.165	9.6344	0	16.223	0	21.824	0	0	0	0
AT4G36020.1	CSDP1 - cold shock domain protein 1	30	0	7.0449	34.263	0	34.571	16.262	0	31.752	50.35	0	0	0
AT1G70820.1	phosphoglucomutase, putative / glucose phosphomutase, putative	67	18.609	18.5	7.4967	0	0	0	66.642	30.615	0	0	0	0
AT2G04039.1 (+1)	unknown protein	21	12.778	26.424	31.548	0	0	7.2232	0	15.917	43.095	0	0	0
AT1G53670.1	MSRB1, ATMSRB1 - methionine sulfoxide reductase B 1	23	29.361	17.638	34.293	20.761	24.833	18.096	0	0	9.6271	0	0	0
AT5G08060.1	unknown protein	15	7.1684	0	5.5133	31.09	31.23	24.389	0	0	0	10.114	34.058	8.4298
AT1G52510.1	alpha/beta-Hydrolases superfamily protein	42	0	0	0	34.707	20.81	21.708	17.514	0	0	34.033	0	0
AT3G04550.1	unknown protein	50	0	0	0	45.928	27.156	42.487	9.8739	0	0	28.147	0	0
AT1G56190.1 (+1)	Phosphoglycerate kinase family protein	50	245.69	113.58	167.97	0	0	0	308.34	174.52	167.46	0	0	0
AT4G24620.1	PGI1, PGI - phosphoglucose isomerase 1	67	0	0	0	0	0	0	103.12	8.689	0	0	0	0
AT2G40840.1	DPE2 - disproportionating enzyme 2	110	22.58	24.7	7.4967	0	0	0	60.135	0	0	0	0	0
AT2G47910.1 (+1)	CRR6 - chlororespiratory reduction 6	28	0	0	0	34.707	36.09	28.944	19.556	0	0	13.946	0	4.8232
AT3G25660.1	Amidase family protein	57	29.227	28.212	34.254	0	0	0	0	45.589	33.464	0	0	0
AT1G01080.1 (+1)	RNA-binding (RRM/RBD/RNP motifs) family protein	33	24.01	25.579	26.861	0	0	0	0	27.375	9.6271	0	0	0
AT5G41950.1	Tetratricopeptide repeat (TPR)-like superfamily protein	62	0	0	0	23.304	32.361	46.136	0	0	0	22.996	22.905	0
AT1G01470.1	LEA14, LSR3 - Late embryogenesis abundant protein	17	0	0	0	47.648	18.667	51.481	20.323	0	0	10.083	0	0
AT1G74470.1	Pyridine nucleotide-disulphide oxidoreductase family protein	52	0	0	0	5.0305	0	0	0	0	0	30.107	26.897	56.457
AT2G20890.1	PSB29, THF1 - photosystem II reaction center PSB29 protein	34	0	0	0	0	0	0	32.986	9.7892	83.108	16.073	0	0
AT5G59880.1 (+1)	ADF3 - actin depolymerizing factor 3	16	28.682	22.956	27.883	0	0	0	19.675	32.879	39.56	0	0	0
AT3G11400.1 (+1)	EIF3G1, ATEIF3G1 - eukaryotic translation initiation factor 3G1	33	10.753	7.0449	20.386	41.58	37.95	38.848	0	0	0	0	0	0
AT4G17330.1	ATG2484-1, G2484-1 - G2484-1 protein	218	0	0	0	34.602	55.149	47.945	0	0	0	0	0	0
AT1G79550.1 (+1)	PGK - phosphoglycerate kinase	42	25.906	48.485	37.096	0	0	0	104	24.13	34.619	0	0	0
AT4G29840.1	MTO2, TS - Pyridoxal-5'-phosphate-dependent enzyme family protein	58	8.0547	25.546	14.864	0	0	0	43.572	21.875	27.503	0	0	0
AT1G64500.1	Glutaredoxin family protein	41	0	0	0	0	0	0	34.2	14.706	33.315	25.141	33.634	51.005
AT3G18740.1	Ribosomal protein L7Ae/L30e/S12e/Gadd45 family protein	12	22.193	17.638	7.4967	19.948	25.771	31.633	0	27.06	0	0	0	0
AT5G60640.1 (+1)	ATPDIL1-4, PDI2, ATPDI2, PDIL1-4 - PDI-like 1-4	66	0	0	0	0	0	12.585	0	0	0	59.226	45.774	80.319
AT3G52140.1 (+3)	tetratricopeptide repeat (TPR)-containing protein	153	0	0	0	0	34.107	14.472	5.4849	8.689	0	30.99	41.574	29.656
AT1G75100.1	JAC1 - J-domain protein required for chloroplast accumulation response 1	72	0	0	0	23.986	14.165	33.448	0	0	23.931	6.9347	50.32	26.629
AT2G42500.1	PP2A-3 - protein phosphatase 2A-3	36	0	0	0	34.309	30.791	3.5804	0	0	0	42.121	18.844	35.936
AT2G43790.1	ATMPK6, MPK6, MAPK6, ATMAPK6 - MAP kinase 6	45	0	0	0	35.416	2.0848	0	0	0	0	43.139	3.812	71.335
AT3G04920.1	Ribosomal protein S24e family protein	15	36.988	41.392	38.999	28.574	45.409	37.123	0	0	0	0	0	0
AT1G31330.1	PSAF - photosystem I subunit F	24	0	0	0	0	0	0	0	0	0	31.079	44.11	70.905
AT5G51070.1	ERD1, CLPD, SAG15 - Clp ATPase	103	0	0	0	26.691	35.385	0	0	0	0	44.221	83.47	66.166
AT4G26780.1	AR192 - Co-chaperone GrpE family protein	36	0	0	0	0	0	0	31.48	15.386	83.792	12.074	18.949	2.3901
AT5G38470.1	RAD23D - Rad23 UV excision repair protein family	40	0	0	0	50.777	60.055	49.71	0	0	0	0	0	0
AT3G56070.1 (+1)	ROC2 - rotamase cyclophilin 2	19	32.225	22.014	36.043	0	0	0	11.209	27.819	34.249	0	0	0
AT2G47940.1 (+1)	DEGP2 - DEGP protease 2	67	0	0	0	13.841	0	0	58.938	26.219	0	0	0	0
AT1G16470.1 (+1)	PAB1 - proteasome subunit PAB1	26	50.582	44.048	45.461	0	0	0	0	0	0	0	0	0
AT4G20760.1	NAD(P)-binding Rossmann-fold superfamily protein	32	40.08	42.253	64.052	0	0	0	0	2.2004	0	0	0	0
AT5G06160.1	ATO - splicing factor-related	59	0	0	0	6.8159	0	0	0	0	0	49.249	88.283	79.006
AT5G16660.1 (+1)	unknown protein	18	0	0	0	13.841	20.81	21.721	0	0	9.6271	25.093	37.828	32.892
AT2G27020.1	PAG1 - 20S proteasome alpha subunit G1	27	25.624	24.683	25.98	6.8159	0	0	11.209	14.165	0	3.7453	2.5414	8.4083
AT2G46520.1	cellular apoptosis susceptibility protein, putative / importin-alpha re-exporter, putative	109	0	0	0	15.519	25.881	21.721	0	0	0	39.203	44.31	54.093
AT3G17940.1	Galactose mutarotase-like superfamily protein	37	41.748	53.776	39.03	0	0	0	0	8.689	0	0	0	0
AT1G62480.1	Vacuolar calcium-binding protein-related	17	0	0	0	0	0	0	61.594	0	62.075	0	0	0
AT2G43160.1 (+2)	ENTH/VHS family protein	95	0	0	0	9.3312	16.555	14.472	5.4849	0	14.512	23.217	10.895	81.833
ATCG00160.1	RPS2 - ribosomal protein S2	27	0	0	0	35.33	32.065	7.1607	0	0	0	20.123	0	16.439
AT5G58220.3	TTL - transthyretin-like protein	34	0	0	0	39.746	26.927	23.531	0	0	0	44.193	0	0
ATCG00065.1 (+2)	RPS12A, RPS12 - ribosomal protein S12A	14	17.6	22.903	25.98	24.169	23.718	37.97	0	0	0	0	0	0
AT1G09780.1	Phosphoglycerate mutase, 2,3-bisphosphoglycerate-independent	61	46.96	53.761	11.051	0	0	0	83.993	72.108	33.558	0	0	0
AT2G21385.3 (+2)	unknown protein	38	0	0	0	0	0	0	50.44	0	107.88	0	0	0
AT5G02450.1	Ribosomal protein L36e family protein	12	22.193	28.223	26.045	21.511	24.575	24.383	0	0	0	0	0	0
AT5G08540.1	unknown protein	39	0	0	0	9.6682	33.927	18.096	0	0	0	45.2	30.643	42.5
AT5G64300.1	ATGCH, GCH, ATRIBA1, RFD1 - GTP cyclohydrolase II	59	0	0	0	44.038	32.879	32.543	0	0	0	8.0241	31.477	0
AT5G14320.1	Ribosomal protein S13/S18 family	19	0	0	0	32.097	32.879	41.651	0	39.841	0	0	0	0
AT5G26360.1	TCP-1/cpn60 chaperonin family protein	60	0	7.0622	18.548	17.353	13.812	8.1404	28.068	10.908	0	11.162	0	0
AT4G26970.1	ACO2 - aconitase 2	108	55.559	45.013	31.544	0	0	0	28.022	14.16	0	0	0	0
AT3G23940.1 (+1)	dehydratase family	65	9.5315	29.052	25.949	0	0	0	31.366	31.525	12.928	0	0	0
AT5G55280.1	FTSZ1-1, ATFTSZ1-1, CPFTSZ - homolog of bacterial cytokinesis Z-ring protein FTSZ 1-1	46	0	0	0	38.01	33.178	42.473	5.7241	0	0	16.073	0	0
AT1G17290.1	AlaAT1 - alanine aminotransferas	60	7.1684	17.63	0	0	0	0	60.187	24.893	19.163	0	0	0
AT3G16950.1 (+1)	LPD1, ptlpd1 - lipoamide dehydrogenase 1	61	0	0	0	125.23	144.93	125.56	0	127.01	0	0	0	0
AT4G19150.1	Ankyrin repeat family protein	26	0	0	0	0	0	0	32.124	40.404	90.829	0	0	0
AT5G12110.1	Glutathione S-transferase, C-terminal-like;Translation elongation factor EF1B/ribosomal protein S6	25	0	0	0	0	0	0	82.539	11.322	62.476	0	0	0
AT1G31730.1	Adaptin family protein	104	0	0	0	33.591	19.649	20.778	0	0	2.4033	32.02	36.467	12.005
AT5G08100.1	N-terminal nucleophile aminohydrolases (Ntn hydrolases) superfamily protein	33	25.777	21.161	20.363	6.8159	16.555	32.543	0	0	23.931	0	0	0
AT4G38710.1	glycine-rich protein	49	0	0	0	21.687	17.493	34.333	0	0	55.036	0	12.633	2.3901
AT1G59900.1	AT-E1 ALPHA, E1 ALPHA - pyruvate dehydrogenase complex E1 alpha subunit	43	8.4984	24.683	25.175	0	0	0	22.538	44.66	16.624	0	0	0
AT1G21630.2 (+1)	Calcium-binding EF hand family protein	135	0	0	0	6.8159	34.107	21.708	0	0	0	20.098	59.677	35.597
AT1G51650.1	ATP synthase epsilon chain, mitochondrial	8	0	0	0	32.814	36.372	28.952	0	0	0	0	2.5414	8.4513
AT3G52990.1	Pyruvate kinase family protein	57	7.1684	8.7855	0	0	0	0	57.397	0	4.7793	0	0	0
AT3G59980.1	Nucleic acid-binding, OB-fold-like protein	30	31.636	33.445	49.173	0	0	0	0	0	2.4837	0	0	0
AT1G20810.1	FKBP-like peptidyl-prolyl cis-trans isomerase family protein	26	24.917	60.816	57.643	0	0	0	0	0	0	0	0	0
AT3G44590.1 (+1)	60S acidic ribosomal protein family	11	0	0	0	0	0	0	30.765	0	33.513	10.16	2.5414	12.816
AT1G35720.1	ANNAT1, OXY5, ATOXY5 - annexin 1	36	0	0	0	0	0	0	67.373	8.7906	23.931	0	0	0
AT1G27090.1	glycine-rich protein	46	0	0	0	38.928	52.343	51.548	0	0	0	0	0	0
AT4G32470.1	Cytochrome bd ubiquinol oxidase, 14kDa subunit	15	1.633	28.205	18.548	21.575	15.344	33.51	0	0	0	2.0719	0	0
AT5G47840.1	AMK2 - adenosine monophosphate kinase	31	38.821	38.714	29.664	0	0	0	0	2.2004	0	0	0	0
AT3G52750.1	FTSZ2-2 - Tubulin/FtsZ family protein	50	0	0	0	67.475	47.971	55.169	0	0	0	78.203	10.179	18.076
AT5G28050.1	Cytidine/deoxycytidylate deaminase family protein	20	36.759	32.607	41.768	0	0	0	0	0	0	0	0	0
AT4G15000.1 (+1)	Ribosomal L27e protein family	16	3.6753	7.0622	11.051	21.424	49.789	37.009	0	0	0	0	0	0
AT3G25690.1 (+2)	CHUP1 - Hydroxyproline-rich glycoprotein family protein	112	0	0	0	5.0305	0	0	0	0	0	41.133	65.18	73.425
AT1G52000.1	Mannose-binding lectin superfamily protein	74	0	0	0	22.507	34.975	64.197	0	0	0	12.981	0	0
AT4G02930.1	GTP binding Elongation factor Tu family protein	49	39.793	43.208	36.238	0	0	0	19.197	13.033	0	0	0	0
ATCG00820.1	RPS19 - ribosomal protein S19	11	24.934	26.383	25.888	15.568	23.502	10.873	0	0	0	0	0	0
AT3G17900.1	unknown protein	92	0	0	0	0	21.626	14.472	0	0	0	25.102	46.62	52.359
AT2G20630.1	PIA1 - PP2C induced by AVRRPM1	30	25.777	29.105	24.199	0	0	0	5.7241	51.464	0	0	0	0
AT2G38410.1	ENTH/VHS/GAT family protein	72	0	0	0	0	12.764	0	14.599	0	0	23.128	12.633	53.879
AT3G24503.1	ALDH2C4, ALDH1A, REF1 - aldehyde dehydrogenase 2C4	54	25.777	35.268	7.4967	0	0	0	33.507	26.27	0	0	0	0
AT3G56240.1	CCH - copper chaperone	13	37.859	35.149	36.843	0	0	0	0	3.8821	26.134	0	0	0
AT5G61510.1	GroES-like zinc-binding alcohol dehydrogenase family protein	44	33.89	28.205	22.49	0	0	0	0	15.944	0	0	0	0
AT3G45190.1	SIT4 phosphatase-associated family protein	88	0	0	0	0	0	0	0	0	0	83.14	60.663	41.322
AT4G38680.1	GRP2, CSDP2, CSP2, ATCSP2 - glycine rich protein 2	19	7.1684	11.457	18.613	11.402	22.672	14.472	0	0	26.369	0	0	0
AT5G48220.1	Aldolase-type TIM barrel family protein	42	14.471	14.969	11.051	0	5.9545	0	8.2273	30.357	38.326	0	0	0
AT1G03310.1 (+1)	ATISA2, ISA2, DBE1, BE2 - debranching enzyme 1	99	0	0	0	38.979	24.601	9.0081	0	0	0	33.139	12.633	32.248
AT4G36810.1	GGPS1 - geranylgeranyl pyrophosphate synthase 1	40	0	0	0	0	0	0	11.448	13.186	19.072	0	0	0
AT5G48580.1	FKBP15-2 - FK506- and rapamycin-binding protein 15 kD-2	18	0	0	0	0	0	0	30.645	22.87	64.782	0	0	0
AT5G47030.1	ATPase, F1 complex, delta/epsilon subunit	22	0	0	0	21.641	24.566	47.034	0	0	0	0	0	0
AT4G35830.1	ACO1 - aconitase 1	98	73.235	24.225	0	0	0	0	89.295	28.952	0	0	0	0
AT3G02080.1	Ribosomal protein S19e family protein	16	13.778	24.508	29.729	38.01	33.11	32.556	0	17.378	7.1541	0	0	0
AT4G28910.1 (+2)	NINJA - novel interactor of JAZ	45	0	0	0	17.353	35.453	28.959	0	0	0	0	0	4.8232
AT1G18080.1	ATARCA, RACK1A_AT, RACK1A - Transducin/WD40 repeat-like superfamily protein	36	0	0	0	43.411	23.702	1.8345	14.071	30.564	0	22.175	0	0
AT2G42540.1 (+1)	COR15A, COR15 - cold-regulated 15a	13	44.113	64.352	46.568	0	0	0	0	0	19.163	0	0	0
AT3G60240.3 (+2)	EIF4G, CUM2 - eukaryotic translation initiation factor 4G	188	0	0	0	20.701	32.162	47.095	0	0	0	0	30.643	3.6496
AT4G17560.1	Ribosomal protein L19 family protein	26	0	0	0	25.743	33.532	36.097	0	0	0	0	0	0
AT5G44130.1	FLA13 - FASCICLIN-like arabinogalactan protein 13 precursor	26	7.1684	7.0449	19.509	24.169	23.787	21.708	0	0	28.79	0	0	0
AT1G01960.1	EDA10 - SEC7-like guanine nucleotide exchange family protein	195	0	0	0	29.384	24.833	13.481	0	0	0	20.085	7.2199	10.841
AT5G57040.1	Lactoylglutathione lyase / glyoxalase I family protein	22	19.326	10.577	26.904	0	0	0	19.675	21.875	38.326	0	0	0
AT3G15840.1 (+3)	PIFI - post-illumination chlorophyll fluorescence increase	30	0	0	0	0	0	0	53.237	0	28.79	0	0	0
AT3G22960.1	PKP1, PKP-ALPHA - Pyruvate kinase family protein	65	0	0	0	31.852	0	7.2232	46.982	0	0	11.007	0	0
AT5G22770.1 (+3)	alpha-ADR - alpha-adaptin	112	0	0	0	18.161	29.087	25.332	0	0	0	20.098	25.195	45.169
AT2G40660.1	Nucleic acid-binding, OB-fold-like protein	42	15.584	34.341	25.126	0	0	0	11.209	26.219	26.308	0	0	0
AT3G44340.1 (+1)	CEF - clone eighty-four	118	0	0	0	24.274	16.092	18.084	0	0	0	41.151	18.949	35.767
AT3G57290.1	EIF3E, TIF3E1, ATEIF3E-1, INT-6, ATINT6, INT6 - eukaryotic translation initiation factor 3E	52	0	0	0	37.085	12.764	35.237	0	0	0	16.073	0	0
AT1G14610.1	TWN2, VALRS - valyl-tRNA synthetase / valine--tRNA ligase (VALRS)	126	0	7.0622	7.3676	0	0	0	36.25	41.245	33.558	0	0	0
AT2G35820.1	ureidoglycolate hydrolases	21	21.505	42.33	29.793	0	0	0	12.19	0	0	0	0	0
AT3G03980.1	NAD(P)-binding Rossmann-fold superfamily protein	28	23.075	41.376	51.106	0	0	0	0	4.8079	0	0	0	0
AT3G10060.1	FKBP-like peptidyl-prolyl cis-trans isomerase family protein	25	22.193	20.322	22.304	0	0	12.633	0	0	22.599	0	0	0
AT5G55230.1	ATMAP65-1, MAP65-1 - microtubule-associated proteins 65-1	66	0	0	0	19.089	0	21.708	30.884	0	2.4837	1.9651	0	0
AT5G16070.1 (+1)	TCP-1/cpn60 chaperonin family protein	59	0	0	0	10.224	12.069	7.2232	25.741	41.375	3.3169	4.037	0	0
AT2G47390.1	Prolyl oligopeptidase family protein	106	0	0	0	0	0	0	52.914	13.033	23.977	0	0	0
AT1G24360.1	NAD(P)-binding Rossmann-fold superfamily protein	34	11.44	18.491	11.245	0	0	0	16.933	40.459	26.373	0	0	0
AT1G68590.1	Ribosomal protein PSRP-3/Ycf65	18	0	0	0	29.36	2.9911	33.474	0	0	0	0	0	0
AT5G66420.1 (+1)	unknown protein	70	0	0	0	0	0	0	20.355	19.727	0	10.008	0	0
AT4G13350.1 (+1)	NIG - NSP (nuclear shuttle protein)-interacting GTPase	65	0	0	0	26.873	32.185	32.714	0	0	22.87	0	0	16.417
AT1G15690.1	AVP1, ATAVP3, AVP-3, AtVHP1;1 - Inorganic H pyrophosphatase family protein	81	0	0	0	0	0	0	40.388	0	5.5037	0	0	19.537
AT3G56490.1	HIT3, HINT1 - HIS triad family protein 3	16	22.193	18.529	29.729	0	0	0	0	18.369	23.977	0	0	0
AT4G17520.1	Hyaluronan / mRNA binding family	39	22.058	26.329	38.989	7.0249	13.12	17.203	0	0	0	0	0	0
AT4G39980.1	DHS1 - 3-deoxy-D-arabino-heptulosonate 7-phosphate synthase 1	58	0	0	0	29.519	0	0	0	0	0	51.255	57.982	56.792
AT5G64400.1	unknown protein	14	0	0	0	29.571	37.067	26.224	0	0	0	0	0	0
AT3G62120.1 (+1)	Class II aaRS and biotin synthetases superfamily protein	61	0	0	0	0	0	0	61.721	0	33.513	0	0	0
AT2G27680.1	NAD(P)-linked oxidoreductase superfamily protein	43	12.455	0	7.3676	20.761	16.555	10.873	14.071	0	0	0	0	0
AT5G60360.1 (+2)	SAG2, AALP, ALP - aleurain-like protease	39	21.184	17.63	23.257	0	0	0	16.813	25.203	31.141	0	0	0
AT3G06720.1 (+1)	AT-IMP, ATKAP ALPHA, AIMP ALPHA, IMPA-1, IMPA1 - importin alpha isoform 1	59	0	0	0	56.833	53.689	43.442	0	0	0	59.225	26.972	5.3642
AT5G11880.1	Pyridoxal-dependent decarboxylase family protein	54	19.388	17.451	0	0	0	0	37.729	20.706	19.163	0	0	0
AT3G11130.1	Clathrin, heavy chain	193	0	0	0	190.87	99.269	133.94	47.932	0	0	445.71	0	242.44
AT3G12130.1	KH domain-containing protein / zinc finger (CCCH type) family protein	26	0	0	0	23.228	42.326	36.167	0	0	0	8.0241	20.543	0
AT1G54290.1 (+4)	Translation initiation factor SUI1 family protein	13	40.802	36.122	37.096	0	0	0	0	0	9.5362	0	0	0
AT4G22930.1	PYR4, DHOASE - pyrimidin 4	42	34.105	28.214	35.186	0	0	0	0	37.196	0	0	0	0
AT4G13850.3 (+2)	ATGRP2 - glycine-rich RNA-binding protein 2	15	37.747	32.605	48.341	0	0	0	0	0	0	0	0	0
AT3G04610.1	FLK - RNA-binding KH domain-containing protein	63	0	0	0	20.866	45.411	43.416	0	0	0	0	0	12.816
AT1G64550.1	ATGCN3, GCN3 - general control non-repressible 3	80	0	0	0	20.761	24.833	10.873	0	0	0	29.995	14.843	27.161
AT4G32180.1 (+2)	ATPANK2, PANK2 - pantothenate kinase 2	100	0	0	0	33.673	32.879	18.096	8.2273	0	0	0	3.4127	0
AT3G59760.1 (+1)	OASC, ATCS-C - O-acetylserine (thiol) lyase isoform C	46	33.175	35.276	49.2	0	0	0	0	41.763	38.015	0	0	0
AT5G54310.1	NEV, AGD5 - ARF-GAP domain 5	53	0	0	0	39.463	32.228	41.54	0	0	0	0	0	0
AT3G48110.1	EDD1, EDD - glycine-tRNA ligases	120	0	0	0	0	0	0	66.423	0	0	0	12.633	12.816
AT5G59750.1 (+1)	DHBP synthase RibB-like alpha/beta domain;GTP cyclohydrolase II	56	0	0	0	28.541	43.323	28.944	0	0	0	16.073	0	0
AT1G48830.1 (+1)	Ribosomal protein S7e family protein	22	0	0	0	37.117	28.856	31.639	0	8.7906	0	0	0	0
AT5G62390.1	ATBAG7, BAG7 - BCL-2-associated athanogene 7	52	0	0	0	0	0	0	0	0	0	36.201	75.613	85.443
AT2G43460.1 (+1)	Ribosomal L38e protein family	8	14.795	21.161	22.296	24.169	3.9604	5.4046	0	21.875	0	0	0	0
AT1G20630.1	CAT1 - catalase 1	57	0	7.7701	0	207.69	127.97	122.88	0	0	0	63.037	0	8.5358
AT2G25840.1 (+2)	OVA4 - Nucleotidylyl transferase superfamily protein	45	12.525	15.807	26.968	0	0	0	19.508	34.914	2.4033	0	0	0
AT3G29320.1	Glycosyl transferase, family 35	109	0	0	0	0	0	0	88.809	0	0	0	0	0
AT3G60245.1 (+1)	Zinc-binding ribosomal protein family protein	10	11.819	7.9011	18.495	15.494	23.79	26.179	0	0	0	0	0	0
AT5G27470.1	seryl-tRNA synthetase / serine--tRNA ligase	52	14.795	14.107	14.864	0	0	0	36.369	30.615	0	0	0	0
AT2G31370.1 (+5)	Basic-leucine zipper (bZIP) transcription factor family protein	45	0	0	0	0	0	10.873	11.209	0	0	35.108	39.499	45.291
AT5G62350.1	Plant invertase/pectin methylesterase inhibitor superfamily protein	22	24.698	21.161	20.363	0	0	0	0	23.747	39.114	0	0	0
AT1G54410.1	dehydrin family protein	11	0	0	0	0	0	3.6269	0	0	0	32.202	62.456	62.501
AT3G15020.1	mMDH2 - Lactate/malate dehydrogenase family protein	36	202.14	183.2	205.11	0	0	0	0	19.803	0	0	0	0
AT2G33830.2	Dormancy/auxin associated family protein	12	14.795	21.169	36.265	0	20.81	25.332	0	0	0	0	0	0
AT1G60710.1	ATB2 - NAD(P)-linked oxidoreductase superfamily protein	38	19.31	21.161	25.916	0	0	0	5.4849	46.984	0	0	0	0
AT1G11650.2	ATRBP45B, RBP45B - RNA-binding (RRM/RBD/RNP motifs) family protein	44	0	0	0	42.923	26.149	23.287	0	0	0	0	10.188	2.4331
AT1G74920.1	ALDH10A8 - aldehyde dehydrogenase 10A8	54	7.627	0	0	0	0	0	35.534	28.429	46.64	0	0	0
AT1G45201.1 (+1)	ATTLL1, TLL1 - triacylglycerol lipase-like 1	55	0	0	0	20.761	28.624	21.708	0	0	0	28.135	3.3646	27.036
AT5G43960.1	Nuclear transport factor 2 (NTF2) family protein with RNA binding (RRM-RBD-RNP motifs) domain	50	0	0	0	24.243	9.0918	7.2232	0	0	0	31.092	19.783	42.057
AT1G52360.1	Coatomer, beta' subunit	104	0	0	0	5.2004	0	0	0	0	0	51.19	47.021	40.533
AT5G48230.2	EMB1276, ACAT2 - acetoacetyl-CoA thiolase 2	41	33.404	21.161	9.1825	0	0	0	0	47.993	0	0	0	0
AT2G18230.1	AtPPa2, PPa2 - pyrophosphorylase 2	25	18.38	25.553	33.412	10.537	0	18.084	0	0	0	0	0	0
AT4G35630.1	PSAT - phosphoserine aminotransferase	47	33.175	33.483	25.98	0	0	0	0	23.963	0	0	0	0
AT5G47480.1	RGPR-related	146	0	0	0	5.2004	16.555	7.2232	1.4225	0	0	31.09	45.778	19.537
AT1G77090.1	Mog1/PsbP/DUF1795-like photosystem II reaction center PsbP family protein	29	33.404	24.683	29.729	0	0	0	0	21.875	0	0	0	0
AT5G48810.1	ATB5-B, B5 #3, ATCB5-D, CB5-D - cytochrome B5 isoform D	15	0	0	0	27.524	46.421	21.646	0	0	0	0	7.6331	2.4331
AT5G58070.1	ATTIL, TIL - temperature-induced lipocalin	21	0	0	0	45.919	32.062	37.076	0	0	0	0	0	0
AT5G27640.2 (+1)	TIF3B1, EIF3B, ATEIF3B-1, EIF3B-1, ATTIF3B1 - translation initiation factor 3B1	85	0	0	0	0	0	0	0	0	0	46.303	39.058	88.996
AT2G37620.1 (+2)	ACT1, AAc1 - actin 1	42	0	0	0	73.365	77.603	38.743	0	0	0	164.08	154.33	65.972
AT5G25610.1	RD22, ATRD22 - BURP domain-containing protein	42	0	0	0	21.61	29.902	32.619	0	0	0	0	0	0
AT2G30695.1 (+1)	unknown protein	22	15.254	24.683	29.793	0	0	0	0	0	38.154	0	0	0
AT2G14750.1	APK, AKN1, ATAKN1, APK1 - APS kinase	30	29.591	30.007	37.161	0	0	0	0	0	19.254	0	0	0
AT5G08570.1	Pyruvate kinase family protein	55	15.725	15.006	11.289	1.7621	0	0	14.663	17.363	2.473	0	0	0
AT1G61520.1 (+2)	LHCA3 - photosystem I light harvesting complex gene 3	29	0	0	0	11.45	25.881	10.873	0	0	0	16.073	47.369	23.122
AT4G17530.1	RAB1C, ATRAB1C, ATRABD2C - RAB GTPase homolog 1C	22	0	0	0	28.514	2.9915	20.653	0	0	0	5.6187	5.0918	7.2132
AT3G15880.1 (+2)	WSIP2, TPR4 - WUS-interacting protein 2	124	0	0	0	28.1	33.154	50.652	0	0	0	68.331	25.125	8.247
AT4G33740.1 (+2)	unknown protein	53	0	0	0	0	0	0	0	0	0	39.127	82.422	4.9482
AT3G09630.1	Ribosomal protein L4/L1 family	45	14.797	31.54	14.658	120.91	121.41	125.6	0	0	0	0	0	0
AT5G12950.1	Putative glycosyl hydrolase of unknown function (DUF1680)	96	19.495	35.276	30.652	0	0	0	14.771	3.3292	0	0	0	0
AT4G09670.1	Oxidoreductase family protein	40	22.193	0	0	0	0	0	16.813	39.127	35.716	0	0	0
AT3G13860.1	HSP60-3A - heat shock protein 60-3A	60	21.964	14.09	11.245	0	0	0	0	34.908	28.79	0	0	0
AT2G40590.1	Ribosomal protein S26e family protein	15	0	0	0	56.282	67.269	45.188	0	0	0	0	0	0
AT5G18230.1 (+1)	transcription regulator NOT2/NOT3/NOT5 family protein	93	0	0	0	25.155	34.571	34.329	0	0	9.6271	0	0	0
AT3G17020.1	Adenine nucleotide alpha hydrolases-like superfamily protein	18	0	0	0	0	8.046	10.793	0	19.551	26.224	22.005	6.6565	2.4331
AT4G39080.1	VHA-A3 - vacuolar proton ATPase A3	93	0	0	0	18.902	20.81	7.2232	8.2273	0	0	16.073	37.793	29.349
AT1G15130.1	Endosomal targeting BRO1-like domain-containing protein	95	0	0	0	24.721	0	0	0	0	0	25.139	37.793	0
AT3G43540.1	Protein of unknown function (DUF1350)	41	0	0	0	31.09	31.181	24.347	0	0	0	12.074	0	0
AT1G30580.1	GTP binding	44	5.6099	0	5.5222	0	0	0	50.393	18.48	0	0	0	0
AT1G69200.1	FLN2 - fructokinase-like 2	69	0	0	0	0	0	0	0	0	0	34.956	49.509	50.947
AT2G29530.1 (+1)	TIM10 - Tim10/DDP family zinc finger protein	9	0	0	0	46.463	20.425	47.75	0	0	0	0	0	0
AT1G74960.1 (+2)	FAB1, KAS2, ATKAS2 - fatty acid biosynthesis 1	58	0	0	5.5222	0	0	0	0	19.568	0	21.068	0	2.4331
AT5G40770.1	ATPHB3, PHB3 - prohibitin 3	30	0	0	0	21.664	18.692	21.77	0	0	0	35.002	0	0
AT3G10650.1	unknown protein	136	0	0	0	10.378	47.809	55.965	0	0	0	0	0	0
AT4G25050.1 (+1)	ACP4 - acyl carrier protein 4	15	0	0	7.4967	0	0	0	26.462	17.48	9.6271	1.9651	0	0
AT4G24820.1 (+1)	26S proteasome, regulatory subunit Rpn7;Proteasome component (PCI) domain	44	0	0	0	20.733	17.598	5.5426	22.538	0	0	12.036	0	3.5762
AT3G20630.1	UBP14, TTN6, ATUBP14, PER1 - ubiquitin-specific protease 14	88	0	0	0	28.547	20.578	7.2232	0	0	0	28.135	0	0
AT5G38480.1 (+1)	GRF3, RCI1 - general regulatory factor 3	29	0	0	0	37.906	37.133	10.879	57.245	8.7906	19.254	0	0	0
AT1G03475.1	LIN2, HEMF1, ATCPO-I - Coproporphyrinogen III oxidase	44	34.061	28.205	11.051	0	0	0	16.066	0	0	0	0	0
AT1G27970.1 (+1)	NTF2B - nuclear transport factor 2B	14	0	0	0	31.09	29.904	28.944	0	0	0	14.147	0	0
AT2G24940.1	AtMAPR2, MAPR2 - membrane-associated progesterone binding protein 2	11	28.521	26.464	36.392	0	0	0	0	0	7.1358	0	0	0
AT5G54900.1	ATRBP45A, RBP45A - RNA-binding protein 45A	42	0	0	0	43.176	32.836	25.345	0	0	0	8.0241	0	0
AT2G30110.1	ATUBA1, MOS5, UBA1 - ubiquitin-activating enzyme 1	120	0	0	0	0	0	0	85.142	0	0	0	0	0
AT1G04850.1	ubiquitin-associated (UBA)/TS-N domain-containing protein	47	21.958	21.161	18.613	0	0	0	5.4849	8.689	0	0	0	0
AT1G08680.1 (+2)	ZIGA4, AGD14 - ARF GAP-like zinc finger-containing protein ZIGA4	71	0	0	0	9.4104	0	14.446	0	0	3.6049	9.0066	37.135	17.165
AT4G24550.2	Clathrin adaptor complexes medium subunit family protein	51	0	0	0	20.761	24.601	7.2232	0	0	0	16.048	19.289	25.841
AT4G25740.1	RNA binding Plectin/S10 domain-containing protein	19	0	0	0	8.5178	19.695	31.614	0	0	0	0	0	41.463
AT2G01690.1 (+1)	ARM repeat superfamily protein	84	0	0	0	3.2539	17.653	17.135	0	0	0	7.9288	6.6654	37.766
AT1G16350.1	Aldolase-type TIM barrel family protein	54	29.82	31.737	26.045	0	0	0	0	17.48	9.6271	0	0	0
AT5G53620.1 (+2)	unknown protein	76	0	0	0	26.859	0	29.054	0	0	0	0	0	0
AT3G19450.1	CAD4, ATCAD4, CAD, CAD-C - GroES-like zinc-binding alcohol dehydrogenase family protein	39	0	7.0449	0	0	0	0	38.374	9.6506	0	0	0	0
AT5G63570.1	GSA1 - glutamate-1-semialdehyde-2,1-aminomutase	50	38.776	19.333	0	0	0	0	89.093	62.01	0	0	0	0
AT1G75040.1	PR5, PR-5 - pathogenesis-related gene 5	25	0	11.457	23.941	0	0	0	22.879	0	48.876	0	0	0
AT3G49470.1	NACA2 - nascent polypeptide-associated complex subunit alpha-like protein 2	24	0	0	0	0	0	0	62.537	0	56.169	0	0	0
AT1G04750.1 (+1)	VAMP7B, VAMP721, ATVAMP721, AT VAMP7B - vesicle-associated membrane protein 721	25	0	0	0	7.0249	0	7.2232	1.4225	0	0	22.075	14.317	46.704
AT5G51700.1	PBS2, ATRAR1, RPR2, RAR1 - protein binding;zinc ion binding	25	6.152	17.63	17.575	0	0	0	0	0	41.903	0	0	0
AT2G19480.1 (+2)	NFA02, NFA2, NAP1;2 - nucleosome assembly protein 1;2	44	0	0	0	0	0	0	0	0	0	32.143	45.939	87.607
AT4G02580.1	NADH-ubiquinone oxidoreductase 24 kDa subunit, putative	28	0	13.163	0	7.0249	12.764	10.873	0	0	0	0	0	0
AT1G51690.1 (+2)	ATB ALPHA, B ALPHA - protein phosphatase 2A 55 kDa regulatory subunit B alpha isoform	57	0	0	0	6.8159	20.81	7.2232	0	0	0	43.164	17.144	19.537
AT4G25100.1 (+3)	FSD1, ATFSD1 - Fe superoxide dismutase 1	24	12.276	7.2849	15.128	0	0	0	17.677	17.939	13.34	0	0	0
AT5G43330.1	Lactate/malate dehydrogenase family protein	36	245.23	227.78	232.58	0	0	0	0	85.455	0	0	0	0
AT4G29010.1	AIM1 - Enoyl-CoA hydratase/isomerase family	78	0	7.0622	7.3676	13.841	8.5092	7.2488	5.7241	31.298	0	6.059	0	0
AT1G03860.1 (+1)	ATPHB2, PHB2 - prohibitin 2	32	0	0	0	21.664	0	1.8605	0	0	0	28.048	2.5504	8.2375
AT5G06290.1	2-Cys Prx B, 2CPB - 2-cysteine peroxiredoxin B	30	5.3178	45.844	22.999	5.1888	0	0	116.13	21.976	68.312	0	0	0
AT2G28605.1	Photosystem II reaction center PsbP family protein	26	25.911	24.683	31.479	0	0	0	0	9.7892	20.365	0	0	0
AT2G18040.1	PIN1AT - peptidylprolyl cis/trans isomerase, NIMA-interacting 1	13	28.602	29.891	48.973	0	0	0	0	0	0	0	0	0
AT4G30160.1 (+1)	VLN4, ATVLN4 - villin 4	109	0	10.521	0	0	0	0	16.813	13.186	35.816	0	0	0
AT5G19940.1	Plastid-lipid associated protein PAP / fibrillin family protein	26	0	0	0	13.841	16.092	21.708	0	0	0	1.9844	29.707	38.761
AT4G29670.1	ACHT2 - atypical CYS HIS rich thioredoxin 2	26	0	5.2029	7.3676	0	0	0	11.892	21.824	59.556	0	0	0
AT5G67590.1	FRO1 - NADH-ubiquinone oxidoreductase-related	17	0	0	7.3676	17.249	32.113	32.568	0	0	0	0	0	0
AT4G00620.1	Amino acid dehydrogenase family protein	39	29.591	19.247	48.166	0	0	0	0	13.186	0	0	0	0
AT2G30790.1	PSBP-2 - photosystem II subunit P-2	13	60.345	50.886	59.984	5.1888	17.461	16.102	13.709	0	16.728	0	0	0
AT5G35790.1	G6PD1 - glucose-6-phosphate dehydrogenase 1	65	0	0	0	21.626	24.833	28.895	9.7776	0	0	12.074	0	0
AT2G41680.1	NTRC - NADPH-dependent thioredoxin reductase C	58	18.38	7.0622	0	0	0	0	53.422	0	0	0	0	0
AT3G29360.1 (+1)	UDP-glucose 6-dehydrogenase family protein	53	0	0	0	24.169	16.555	14.472	13.951	0	0	0	0	0
AT4G23650.1	CDPK6, CPK3 - calcium-dependent protein kinase 6	59	0	0	0	6.8159	13.115	0	13.07	0	0	0	0	0
AT1G31180.1	ATIMD3, IMD3, IPMDH1 - isopropylmalate dehydrogenase 3	44	38.089	32.566	14.735	0	0	0	8.5862	0	0	0	0	0
AT1G73660.1	protein tyrosine kinase family protein	112	0	0	0	0	0	0	0	0	0	37.151	33.035	59.997
AT3G11250.1	Ribosomal protein L10 family protein	34	0	0	0	0	0	0	0	0	0	0	0	67.104
AT1G80600.1	WIN1 - HOPW1-1-interacting 1	49	22.193	24.692	14.864	0	0	0	23.085	13.033	0	0	0	0
AT3G47390.1 (+1)	PHS1 - cytidine/deoxycytidylate deaminase family protein	66	0	0	0	28.547	12.069	21.648	0	0	0	21.116	0	25.841
AT3G08510.1 (+2)	ATPLC2, PLC2 - phospholipase C 2	66	0	0	0	0	0	0	0	0	0	51.19	42.403	34.671
AT3G46740.1	TOC75-III, MAR1 - translocon at the outer envelope membrane of chloroplasts 75-III	89	0	0	0	11.926	8.046	5.3705	0	0	0	33.191	18.949	3.5851
AT4G34920.1	PLC-like phosphodiesterases superfamily protein	36	0	0	0	7.0249	9.5574	25.344	0	0	0	41.388	16.953	0
AT3G52560.1	UEV1D-4, MMZ4, UEV1D - ubiquitin E2 variant 1D-4	17	25.777	28.223	37.096	0	0	0	0	0	0	0	0	0
AT3G15090.1	GroES-like zinc-binding alcohol dehydrogenase family protein	39	0	0	7.4967	38.01	28.856	21.708	0	0	0	0	0	0
AT1G75280.1	NmrA-like negative transcriptional regulator family protein	34	33.175	24.692	29.729	0	0	0	0	0	0	0	0	0
AT3G03960.1	TCP-1/cpn60 chaperonin family protein	59	11.44	0	0	6.8159	0	0	41.974	0	0	0	0	0
AT1G32550.1	FdC1 - 2Fe-2S ferredoxin-like superfamily protein	20	0	0	0	15.43	7.5075	10.873	0	0	0	0	0	0
AT4G18810.1 (+1)	NAD(P)-binding Rossmann-fold superfamily protein	65	35.007	32.663	25.98	0	0	0	2.7352	0	0	0	0	0
AT1G26110.1 (+1)	DCP5 - decapping 5	64	0	0	0	34.47	22.095	37.097	0	0	0	0	0	0
AT5G16810.1	Protein kinase superfamily protein	47	0	0	0	13.841	0	14.472	0	0	0	32.122	34.022	23.782
AT2G06050.1 (+2)	OPR3, DDE1 - oxophytodienoate-reductase 3	43	29.698	25.536	19.444	0	0	0	0	30.564	0	0	0	0
AT1G22840.1	CYTC-1, ATCYTC-A - CYTOCHROME C-1	12	7.1684	21.161	15.788	6.8159	0	7.2232	5.4849	0	0	0	0	0
AT2G27820.1	PD1, ADT3 - prephenate dehydratase 1	46	0	0	0	24.169	8.046	14.472	0	0	0	14.991	26.826	27.036
AT3G09500.1	Ribosomal L29 family protein	14	14.795	22.895	14.864	9.3312	24.953	10.873	0	0	0	0	0	0
AT4G29040.1	RPT2a - regulatory particle AAA-ATPase 2A	49	0	0	0	32.93	28.627	21.708	0	0	0	0	0	0
AT1G74260.1	PUR4 - purine biosynthesis 4	154	0	0	0	0	0	0	75.566	0	0	0	0	0
AT2G19760.1	PFN1, PRF1 - profilin 1	14	24.907	14.107	30.598	0	0	0	0	17.48	19.163	0	0	0
AT4G00570.1	NAD-ME2 - NAD-dependent malic enzyme 2	67	12.499	21.161	11.051	0	0	0	25.232	17.48	0	0	0	0
AT2G24420.1 (+1)	DNA repair ATPase-related	50	0	0	0	13.632	20.81	0	0	0	0	24.098	0	25.841
AT5G49460.1	ACLB-2 - ATP citrate lyase subunit B 2	66	0	0	0	134.71	48.963	105.86	43.119	60.823	0	0	0	19.293
AT3G63520.1	CCD1, ATCCD1, ATNCED1, NCED1 - carotenoid cleavage dioxygenase 1	61	0	0	0	21.575	3.9604	7.2232	0	0	0	31.079	0	35.258
AT2G27600.1	SKD1, VPS4, ATSKD1 - AAA-type ATPase family protein	49	0	0	0	13.841	0	14.446	0	0	0	3.954	0	0
AT2G39080.1	NAD(P)-binding Rossmann-fold superfamily protein	38	22.193	24.683	30.652	0	0	0	0	27.278	0	0	0	0
AT5G14910.1	Heavy metal transport/detoxification superfamily protein	19	0	0	0	28.574	37.247	29.886	0	0	0	0	0	0
AT3G48890.1	ATMP2, ATMAPR3, MSBP2, MAPR3 - membrane-associated progesterone binding protein 3	25	0	0	0	0	0	0	0	0	0	12.074	0	0
AT1G75330.1	OTC - ornithine carbamoyltransferase	41	18.609	24.683	7.3676	0	0	0	14.071	2.2195	23.977	0	0	0
AT4G14160.3 (+2)	Sec23/Sec24 protein transport family protein	69	0	0	0	18.978	8.046	7.2232	0	0	0	39.199	12.633	0
ATCG00130.1	ATPF - ATPase, F0 complex, subunit B/B', bacterial/chloroplast	21	0	0	0	15.779	12.069	8.1193	0	0	0	30.087	22.515	12.816
AT1G15140.1	FAD/NAD(P)-binding oxidoreductase	32	15.682	14.124	11.245	0	0	0	22.418	0	9.5362	0	0	0
AT4G29410.1 (+1)	Ribosomal L28e protein family	16	8.5128	8.0047	5.7077	21.803	28.287	29.027	0	0	0	0	0	0
AT5G61210.1	SNAP33, ATSNAP33, SNP33, ATSNAP33B - soluble N-ethylmaleimide-sensitive factor adaptor protein 33	34	0	0	0	0	0	0	13.336	3.5062	68.331	0	0	0
AT2G44120.1 (+1)	Ribosomal protein L30/L7 family protein	28	0	14.933	0	27.73	49.326	42.549	0	0	0	0	0	0
AT1G55260.1 (+1)	Bifunctional inhibitor/lipid-transfer protein/seed storage 2S albumin superfamily protein	25	0	0	25.98	0	0	0	0	0	39.521	0	0	0
AT2G14880.1	SWIB/MDM2 domain superfamily protein	16	15.254	14.855	29.665	0	0	0	0	0	0	6.059	0	0
AT2G42590.1 (+2)	GRF9, GF14 MU - general regulatory factor 9	30	0	0	0	0	0	0	18.829	0	0	36.159	0	34.141
AT5G16290.1 (+1)	VAT1 - VALINE-TOLERANT 1	52	0	0	0	24.169	20.578	28.957	0	0	0	0	0	0
AT1G79040.1	PSBR - photosystem II subunit R	15	0	0	0	17.147	19.487	19.874	0	0	0	34.075	7.6376	8.4298
AT4G39680.1 (+1)	SAP domain-containing protein	69	0	0	0	0	0	0	14.768	0	64.452	0	0	0
AT4G02080.1	ASAR1, ATSARA1C, ATSAR2, SAR2 - secretion-associated RAS super family 2	22	0	0	0	10.224	0	0	0	0	0	0	0	0
AT1G24180.1	IAR4 - Thiamin diphosphate-binding fold (THDP-binding) superfamily protein	43	30.771	32.575	42.782	0	0	0	2.5919	10.694	0	0	0	0
AT3G53970.1	proteasome inhibitor-related	32	0	0	0	34.498	29.087	28.944	0	0	0	0	0	0
AT5G61130.1	PDCB1 - plasmodesmata callose-binding protein 1	20	25.777	17.638	15.822	0	0	0	0	0	9.6271	0	0	0
AT2G38140.1	PSRP4 - plastid-specific ribosomal protein 4	13	0	0	1.8902	30.272	21.693	20.752	0	0	0	0	0	0
AT3G13120.1 (+1)	Ribosomal protein S10p/S20e family protein	21	5.8841	25.61	23.189	4.1386	1.8756	15.311	0	0	0	0	0	0
AT5G23540.1	Mov34/MPN/PAD-1 family protein	34	0	0	0	29.27	37.365	25.332	0	0	0	1.9651	0	0
AT5G16260.1	ELF9 - RNA binding (RRM/RBD/RNP motifs) family protein	58	0	0	0	0	0	0	40.526	0	0	13.04	39.511	0
AT5G11680.1	unknown protein	23	0	0	0	31.903	25.598	39.804	0	0	0	0	0	0
AT5G27850.1	Ribosomal protein L18e/L15 superfamily protein	21	0	0	0	77.931	71.312	73.366	0	0	0	0	0	0
AT3G18240.1 (+1)	Ribosomal protein S24/S35, mitochondrial	48	0	0	0	0	0	0	0	0	0	4.932	97.4	55.038
AT5G10360.1	EMB3010, RPS6B - Ribosomal protein S6e	28	69.528	122.44	74.443	0	85.372	0	0	0	0	0	0	0
AT3G05730.1	Encodes a defensin-like (DEFL) family protein.	10	15.804	7.0622	11.043	0	0	0	0	0	0	0	0	0
AT5G59320.1	LTP3 - lipid transfer protein 3	12	9.0061	12.309	26.904	0	0	0	0	0	9.6271	0	0	0
AT2G41430.1 (+3)	ERD15, LSR1, CID1 - dehydration-induced protein (ERD15)	18	0	0	0	0	18.352	10.873	0	0	0	12.074	0	0
AT3G07660.1	Kinase-related protein of unknown function (DUF1296)	90	0	0	0	0	0	7.2488	0	0	0	12.036	40.617	51.081
AT1G36280.1 (+1)	L-Aspartase-like family protein	59	0	17.655	0	0	0	0	0	73.02	35.961	0	0	0
AT5G54160.1	ATOMT1, OMT1 - O-methyltransferase 1	40	0	0	0	0	0	0	25.041	36.9	0	0	0	0
AT1G06130.1 (+1)	GLX2-4 - glyoxalase 2-4	37	26.007	38.823	31.612	0	0	0	0	0	0	0	0	0
AT5G28840.1 (+1)	GME - GDP-D-mannose 3',5'-epimerase	43	7.627	14.107	0	0	0	0	22.418	0	0	0	3.4078	0
AT5G51300.1 (+2)	splicing factor-related	87	0	0	0	0	14.464	0	10.381	0	29.894	16.073	4.893	0
AT4G34670.1	Ribosomal protein S3Ae	30	14.337	0	0	32.027	20.159	14.446	0	0	0	0	0	0
AT5G17710.1 (+1)	EMB1241 - Co-chaperone GrpE family protein	35	0	0	0	0	0	0	0	0	0	26.137	39.422	80.878
AT5G15970.1	KIN2, COR6.6 - stress-responsive protein (KIN2) / stress-induced protein (KIN2) / cold-responsive protein (COR6.6) / cold-regulated protein (COR6.6)	7	16.713	23.882	27.883	0	0	3.695	0	0	0	0	0	0
AT2G19520.1	FVE, ACG1, MSI4, NFC4, NFC04, ATMSI4 - Transducin family protein / WD-40 repeat family protein	56	18.609	14.107	22.296	0	0	0	18.173	0	0	0	0	0
AT4G16720.1 (+1)	Ribosomal protein L23/L15e family protein	24	0	0	0	34.602	24.833	14.472	0	0	0	0	0	0
AT3G22200.2 (+1)	POP2 - Pyridoxal phosphate (PLP)-dependent transferases superfamily protein	56	0	7.0622	0	0	0	0	35.502	17.48	9.6271	0	0	0
AT1G43190.1 (+2)	PTB3 - polypyrimidine tract-binding protein 3	48	0	0	0	20.448	22.9	26.212	0	0	0	14.032	0	0
AT3G27530.1	GC6, MAG4 - golgin candidate 6	102	0	0	0	0	0	0	0	0	0	32.147	52.09	58.089
AT1G77760.1	NIA1, GNR1, NR1 - nitrate reductase 1	103	0	0	0	0	0	0	0	0	0	50.079	54.99	79.544
AT5G43830.1	Aluminium induced protein with YGL and LRDR motifs	28	0	0	0	6.8159	9.0884	0	14.813	2.2748	21.675	0	0	0
AT3G59870.1	unknown protein	32	0	0	0	32.768	15.97	22.528	5.4849	0	0	0	0	0
AT3G03890.1 (+1)	FMN binding	35	31.867	18.468	42.617	0	0	0	0	0	0	0	0	0
AT3G61140.1	FUS6, ATFUS6, CSN1, COP11, EMB78, ATSK31, SK31 - 26S proteasome, regulatory subunit Rpn7;Proteasome component (PCI) domain	51	0	0	0	13.841	16.555	14.472	0	0	0	1.9844	12.633	2.4331
AT1G79830.1 (+3)	GC5 - golgin candidate 5	108	0	0	0	0	0	18.096	0	0	19.163	0	0	34.66
ATCG00540.1	PETA - photosynthetic electron transfer A	35	0	0	0	25.012	34.901	27.955	0	0	0	0	0	0
AT5G42850.1 (+1)	Thioredoxin superfamily protein	15	25.777	27.288	32.519	0	0	0	0	0	0	0	0	0
AT1G21670.1	unknown protein	77	0	0	0	0	0	0	0	27.481	0	0	0	0
AT5G17310.2	UGP2 - UDP-glucose pyrophosphorylase 2	52	0	4.6482	0	0	0	0	66.651	165.07	0	0	0	0
AT5G12140.1	ATCYS1, CYS1 - cystatin-1	11	9.1435	16.798	16.767	6.7323	12.674	10.931	0	0	0	0	0	0
AT1G17860.1	Kunitz family trypsin and protease inhibitor protein	22	9.0603	24.683	19.536	0	0	0	0	0	12.009	0	0	0
AT5G23900.1	Ribosomal protein L13e family protein	23	0	10.567	11.051	26.07	40.737	39.804	0	0	0	0	0	0
AT1G78570.1	RHM1, ROL1, ATRHM1 - rhamnose biosynthesis 1	75	7.627	1.8593	0	0	0	0	21.054	26.169	0	0	0	0
AT3G01180.1	AtSS2, SS2 - starch synthase 2	88	0	0	0	20.761	16.849	44.274	0	0	0	0	0	0
AT5G40810.1 (+1)	Cytochrome C1 family	34	0	0	0	0	34.037	21.746	0	0	0	23.09	0	0
AT1G09430.1	ACLA-3 - ATP-citrate lyase A-3	47	0	0	0	0	0	0	0	0	0	51.177	12.633	74.084
AT1G47420.1	SDH5 - succinate dehydrogenase 5	28	0	0	0	46.669	25.064	20.865	0	0	0	0	0	0
AT1G66100.1	Plant thionin	14	0	0	14.864	24.274	16.555	21.708	0	0	0	0	0	0
AT5G52920.1	PKP1, PKP-BETA1, PKP2 - plastidic pyruvate kinase beta subunit 1	64	0	16.879	16.76	0	0	0	2.1002	8.7906	0	0	0	0
AT5G17560.1	BolA-like family protein	20	0	10.593	18.613	0	0	0	16.813	0	19.103	0	0	0
AT1G78850.1	D-mannose binding lectin protein with Apple-like carbohydrate-binding domain	49	0	0	0	0	0	0	25.28	22.804	27.458	0	0	0
AT1G61570.1	TIM13 - translocase of the inner mitochondrial membrane 13	9	0	0	0	33.82	27.062	31.771	0	0	0	0	0	0
AT2G17840.1	ERD7 - Senescence/dehydration-associated protein-related	49	0	0	0	0	0	0	50.312	0	14.441	0	0	0
AT5G20280.1	ATSPS1F, SPS1F - sucrose phosphate synthase 1F	117	0	0	0	0	0	0	53.156	0	0	0	0	3.5851
AT4G13010.1	Oxidoreductase, zinc-binding dehydrogenase family protein	34	0	0	15.809	7.0249	19.181	28.039	0	0	0	0	0	0
AT4G38220.1 (+1)	Peptidase M20/M25/M40 family protein	48	0	5.1919	0	0	0	0	11.209	32.851	0	0	0	0
AT4G28730.1	Glutaredoxin family protein	19	0	10.593	7.3676	0	0	0	0	30.564	41.898	0	0	0
AT2G35830.1 (+1)	unknown protein	20	30.513	29.084	22.296	0	0	0	0	0	0	0	0	0
AT1G29150.1	ATS9, RPN6 - non-ATPase subunit 9	47	0	0	0	41.627	0	0	0	0	0	0	0	2.4331
AT5G02770.1	unknown protein	23	0	0	0	0	0	0	20.391	18.617	53.991	0	0	0
AT4G25080.1 (+3)	CHLM - magnesium-protoporphyrin IX methyltransferase	34	0	0	7.4967	0	8.046	9.0081	0	0	0	16.073	12.562	0
AT1G08970.1 (+3)	HAP5C, NF-YC9 - nuclear factor Y, subunit C9	26	0	0	0	0	0	19.887	0	0	0	0	28.064	19.223
AT4G18370.1	DEG5, DEGP5, HHOA - DEGP protease 5	35	14.795	15.034	1.7921	17.249	0	7.2232	5.7241	0	0	0	0	0
AT3G22060.1	Receptor-like protein kinase-related family protein	28	13.343	14.97	17.629	0	0	0	0	18.441	19.163	0	0	0
AT5G17990.1	TRP1, pat1 - tryptophan biosynthesis 1	47	0	0	0	0	0	0	25.876	0	0	0	0	0
ATCG00650.1	RPS18 - ribosomal protein S18	12	0	0	0	10.537	30.13	29.861	0	0	0	0	0	0
AT4G14910.1 (+2)	HISN5B - HISTIDINE BIOSYNTHESIS 5B	29	0	0	0	1.6269	10.418	0	0	0	0	0	0	0
AT4G09620.1	Mitochondrial transcription termination factor family protein	24	18.38	14.107	14.864	0	0	0	0	0	26.16	0	0	0
AT5G52240.1	MSBP1, ATMP1, AtMAPR5 - membrane steroid binding protein 1	24	0	0	0	25.848	15.755	25.332	5.4849	0	0	0	0	0
AT3G15970.1	NUP50 (Nucleoporin 50 kDa) protein	49	0	0	0	0	8.4311	10.793	10.97	0	39.478	0	0	0
AT3G12080.1 (+1)	emb2738 - GTP-binding family protein	73	0	0	0	0	0	0	0	0	0	32.134	44.074	58.193
AT3G02830.1	ZFN1 - zinc finger protein 1	44	0	0	0	6.8159	0	14.459	0	0	2.4033	8.0241	14.337	34.002
AT5G42650.1	AOS, CYP74A, DDE2 - allene oxide synthase	58	0	0	0	17.353	0	0	0	0	0	25.983	5.0918	25.556
AT3G05350.1	Metallopeptidase M24 family protein	79	0	0	0	0	0	0	18.181	0	0	24.11	50.391	3.2988
AT5G56260.1	Ribonuclease E inhibitor RraA/Dimethylmenaquinone methyltransferase	18	23.94	21.161	34.422	0	0	0	0	0	0	0	0	0
AT2G31570.1	ATGPX2, GPX2 - glutathione peroxidase 2	19	11.94	0	34.127	0	0	0	0	0	93.634	0	0	0
AT4G13780.1	methionine--tRNA ligase, putative / methionyl-tRNA synthetase, putative / MetRS, putative	90	0	0	0	0	0	0	36.609	27.38	0	0	0	0
AT2G40510.1	Ribosomal protein S26e family protein	15	0	0	0	44.141	0	43.403	0	0	0	0	0	0
AT4G24830.1 (+1)	arginosuccinate synthase family	54	0	5.2638	3.8211	0	0	0	27.267	26.27	0	0	0	0
AT5G52520.1	OVA6, PRORS1 - Class II aaRS and biotin synthetases superfamily protein	61	7.627	14.107	0	0	0	0	26.6	6.4531	0	0	0	0
AT1G51560.1	Pyridoxamine 5'-phosphate oxidase family protein	44	0	0	0	20.761	21.852	32.581	0	0	0	0	0	0
AT4G29520.1	unknown protein	34	0	0	0	0	0	0	0	0	0	24.11	39.915	56.501
AT1G17210.1	ATILP1, ILP1 - IAP-like protein 1	103	0	0	0	0	0	0	0	0	0	32.147	55.993	24.366
AT5G03370.1	acylphosphatase family	19	24.191	24.683	30.598	0	0	0	0	0	0	0	0	0
AT3G23570.1	alpha/beta-Hydrolases superfamily protein	27	22.186	5.3854	41.774	0	0	0	0	3.381	0	0	0	0
AT1G01050.1 (+1)	AtPPa1, PPa1 - pyrophosphorylase 1	24	0	0	0	17.353	0	0	14.071	17.48	0	0	0	0
AT3G61220.1 (+1)	NAD(P)-binding Rossmann-fold superfamily protein	33	18.38	7.0622	0	0	0	0	17.601	17.48	9.5362	0	0	0
AT4G27960.1 (+8)	UBC9 - ubiquitin conjugating enzyme 9	17	12.386	0	10.003	0	0	0	6.1524	33.484	0	0	0	0
AT1G11910.1	APA1, ATAPA1 - aspartic proteinase A1	55	0	0	0	28.704	12.069	0	8.5862	0	0	0	0	0
AT1G06530.1	Tropomyosin-related	36	0	0	0	0	0	0	0	17.48	19.163	0	0	0
AT3G48750.1	CDKA;1, CDC2AAT, CDK2, CDC2, CDC2A, CDKA1 - cell division control 2	34	0	0	0	13.841	0	14.472	0	0	0	8.0494	0	0
AT1G24020.1 (+1)	MLP423 - MLP-like protein 423	17	18.609	7.0449	14.864	0	0	0	0	21.875	23.931	0	0	0
AT2G20790.1 (+2)	clathrin adaptor complexes medium subunit family protein	67	0	0	0	0	0	0	0	0	0	0	12.562	9.4236
AT5G41520.1	RNA binding Plectin/S10 domain-containing protein	20	0	0	0	9.7134	19.695	12.663	0	0	0	0	0	0
AT5G65950.1	unknown protein	132	0	0	0	6.8159	8.5092	7.2488	0	0	0	24.123	14.264	19.223
AT2G40765.1	unknown protein	6	0	0	0	10.537	24.833	21.708	0	0	0	0	0	0
AT4G33250.1	EIF3K, TIF3K1, ATTIF3K1 - eukaryotic translation initiation factor 3K	26	0	0	0	25.034	20.578	24.341	0	0	0	10.063	0	0
AT1G13320.1 (+1)	PP2AA3 - protein phosphatase 2A subunit A3	66	0	0	0	13.841	0	0	0	0	0	3.1078	0	47.58
AT5G53560.1	ATB5-A, B5 #2, ATCB5-E, CB5-E - cytochrome B5 isoform E	15	0	0	0	18.266	20.578	7.2232	0	0	0	0	5.0918	7.1864
AT2G45180.1	Bifunctional inhibitor/lipid-transfer protein/seed storage 2S albumin superfamily protein	14	8.941	23.821	10.137	0	0	0	0	4.4942	0	0	0	0
AT4G34740.1	ATASE2, CIA1, ATPURF2, ASE2 - GLN phosphoribosyl pyrophosphate amidotransferase 2	61	0	0	0	0	0	0	0	0	0	40.177	25.195	15.782
AT1G60780.1	HAP13 - Clathrin adaptor complexes medium subunit family protein	49	0	0	0	0	3.9604	18.122	0	0	0	24.11	0	0
AT3G54760.1 (+1)	dentin sialophosphoprotein-related	86	0	0	0	0	0	0	0	0	0	17.9	50.391	34.66
AT1G56220.3 (+3)	Dormancy/auxin associated family protein	15	0	0	0	0	0	0	34.319	8.689	28.967	0	0	0
AT2G28790.1	Pathogenesis-related thaumatin superfamily protein	27	0	0	0	17.353	16.555	16.244	0	0	0	20.098	0	0
AT2G17695.1 (+2)	unknown protein	23	0	0	0	13.841	0	0	0	0	0	34.132	0	16.568
AT1G50170.1	ATSIRB, SIRB - sirohydrochlorin ferrochelatase B	25	21.387	0	20.367	0	0	0	0	0	14.304	0	0	0
AT5G06770.1	KH domain-containing protein / zinc finger (CCCH type) family protein	25	0	0	0	29.384	23.604	27.104	0	0	0	0	0	0
AT4G15530.1 (+5)	PPDK - pyruvate orthophosphate dikinase	104	0	10.593	0	0	0	0	42.45	8.7906	0	0	0	0
ATCG00640.1	RPL33 - ribosomal protein L33	8	0	0	0	2.7092	8.5092	11.815	0	0	0	0	0	0
AT1G16460.1 (+3)	ATRDH2, ATMST2, MST2, ST2, STR2, RDH2 - rhodanese homologue 2	35	0	0	0	0	0	0	0	0	0	24.11	25.125	46.923
AT1G79500.1 (+3)	AtkdsA1 - Aldolase-type TIM barrel family protein	32	20.297	17.849	8.42	0	0	0	0	13.186	0	0	0	0
AT3G20050.1	ATTCP-1, TCP-1 - T-complex protein 1 alpha subunit	59	0	0	0	0	6.2804	0	39.112	0	0	0	0	0
AT5G23290.1	PFD5 - prefoldin 5	16	0	0	0	24.169	17.598	36.206	0	0	0	0	0	0
AT5G13030.1	unknown protein	71	0	0	0	0	1.8756	1.7096	14.071	0	9.6271	0	0	0
AT3G27380.1 (+2)	SDH2-1 - succinate dehydrogenase 2-1	31	0	0	0	10.224	8.5092	18.084	0	0	0	11.978	0	0
AT1G08360.1	Ribosomal protein L1p/L10e family	24	0	0	0	51.093	30.145	42.531	0	75.745	0	0	0	0
AT1G20225.1	Thioredoxin superfamily protein	26	18.609	21.161	14.864	0	0	0	0	21.824	0	0	0	0
AT2G35880.1	TPX2 (targeting protein for Xklp2) protein family	47	0	0	0	0	0	0	0	0	0	8.0494	31.477	40.515
AT1G33680.1	KH domain-containing protein	80	0	0	0	4.4713	15.696	34.403	0	0	0	4.7923	0	0
AT3G10520.1	AHB2, GLB2, ARATH GLB2, NSHB2, ATGLB2, HB2 - haemoglobin 2	18	12.893	0	0	0	0	0	13.303	41.443	0	0	0	0
AT1G64510.1	Translation elongation factor EF1B/ribosomal protein S6 family protein	23	0	0	0	24.528	15.236	17.379	0	0	0	0	0	0
AT5G46750.1	AGD9 - ARF-GAP domain 9	44	0	0	0	20.761	14.86	36.191	0	0	0	0	0	0
AT5G23740.1	RPS11-BETA - ribosomal protein S11-beta	18	0	0	0	68.378	92.212	59.385	0	0	0	0	0	0
AT1G27310.1	NTF2A - nuclear transport factor 2A	14	0	0	0	18.114	21.807	18.976	0	0	0	11.007	0	0
AT3G56190.1	ALPHA-SNAP2, ASNAP - alpha-soluble NSF attachment protein 2	33	0	0	0	0	0	0	5.4849	0	0	21.127	28.582	35.808
AT2G30410.1 (+1)	KIS, TFCA - tubulin folding cofactor A (KIESEL)	13	0	0	7.4967	0	0	0	1.296	22.804	34.257	0	0	0
AT5G17020.1 (+1)	XPO1A, ATCRM1, ATXPO1, XPO1, HIT2 - exportin 1A	123	0	0	0	0	0	0	0	0	0	23.052	18.844	28.634
AT4G39150.1 (+1)	DNAJ heat shock N-terminal domain-containing protein	38	21.414	15.785	11.245	0	0	0	0	14.16	0	0	0	0
AT3G08943.1	ARM repeat superfamily protein	96	0	0	0	16.793	20.882	14.426	0	0	0	12.462	0	0
AT3G60820.1 (+2)	PBF1 - N-terminal nucleophile aminohydrolases (Ntn hydrolases) superfamily protein	25	26.893	22.031	0	6.8159	0	0	0	0	0	0	0	0
AT4G34090.2 (+2)	unknown protein	37	0	0	0	0	0	0	16.626	0	0	8.0494	45.385	0
AT1G24510.1	TCP-1/cpn60 chaperonin family protein	59	0	0	0	0	2.0848	0	18.68	2.254	0	12.183	0	7.1196
AT2G19750.1 (+2)	Ribosomal protein S30 family protein	7	0	0	0	16.356	33.11	24.402	0	0	0	0	0	0
AT4G13670.1	PTAC5 - plastid transcriptionally active 5	44	0	0	0	22.491	20.81	32.568	0	0	0	0	0	0
AT3G46970.1	ATPHS2, PHS2 - alpha-glucan phosphorylase 2	95	0	0	0	0	0	0	55.965	0	0	0	0	0
AT4G08900.1	arginase	37	41.031	45.77	40.909	0	0	0	0	0	0	0	0	0
AT1G12310.1	Calcium-binding EF-hand family protein	17	0	0	0	14.706	0	10.873	0	0	35.762	0	0	0
AT1G31190.1	IMPL1 - myo-inositol monophosphatase like 1	40	10.753	0	0	0	0	0	28.142	0	0	0	0	0
AT5G19370.1	rhodanese-like domain-containing protein / PPIC-type PPIASE domain-containing protein	33	0	0	0	38.115	21.575	18.096	0	0	0	0	0	0
AT3G01130.1	unknown protein	6	0	0	0	25.002	25.064	28.957	0	0	0	0	0	0
AT5G23440.1	FTRA1 - ferredoxin/thioredoxin reductase subunit A (variable subunit) 1	20	7.8985	0	25.77	0	0	0	0	0	2.4678	0	0	0
AT4G22150.1	PUX3 - plant UBX domain-containing protein 3	40	0	0	0	0	0	0	21.759	0	78.322	0	0	0
AT4G19710.2	AK-HSDH II, AK-HSDH - aspartate kinase-homoserine dehydrogenase ii	100	0	0	0	7.0249	8.046	7.2232	0	0	0	8.0494	12.562	0
AT5G03290.1	IDH-V - isocitrate dehydrogenase V	41	0	0	0	0	0	0	0	0	0	12.074	37.793	25.841
AT5G09900.1	EMB2107, RPN5A, MSA - 26S proteasome regulatory subunit, putative (RPN5)	51	0	0	0	17.37	9.284	17.196	7.8383	0	0	2.0719	0	0
AT3G43980.1 (+2)	Ribosomal protein S14p/S29e family protein	6	9.8012	22.868	11.127	0	0	0	0	0	0	0	0	0
AT2G21270.1 (+1)	UFD1 - ubiquitin fusion degradation 1	35	0	0	0	24.169	8.046	15.368	0	0	0	16.195	0	2.4331
AT5G60160.1	Zn-dependent exopeptidases superfamily protein	52	0	0	0	0	0	0	0	19.541	0	0	0	0
AT1G76680.1 (+1)	OPR1, ATOPR1 - 12-oxophytodienoate reductase 1	41	22.3	24.683	22.296	0	0	0	0	0	0	0	0	0
AT1G03760.1	Prefoldin chaperone subunit family protein	44	0	0	0	0	0	0	0	0	0	25.151	49.085	43.435
AT3G48870.1 (+1)	ATCLPC, ATHSP93-III, HSP93-III - Clp ATPase	106	0	0	0	79.43	0	0	0	0	0	174.55	162.02	0
AT2G02050.1	NADH-ubiquinone oxidoreductase B18 subunit, putative	12	0	0	0	24.93	26.768	26.174	0	0	0	0	0	0
AT5G37475.1	Translation initiation factor eIF3 subunit	25	0	0	0	0	0	0	27.355	0	43.14	0	0	0
AT3G22380.1 (+1)	TIC - time for coffee	164	0	0	0	18.062	2.8134	0	0	0	0	4.89	15.975	6.0397
AT1G13270.1 (+1)	MAP1C, MAP1B - methionine aminopeptidase 1B	40	10.753	1.7919	14.735	0	0	0	7.8188	0	0	0	0	0
AT4G26750.1	hydroxyproline-rich glycoprotein family protein	46	0	0	0	18.927	34.971	20.861	0	0	0	0	0	0
AT5G07350.1 (+1)	Tudor1, AtTudor1, TSN1 - TUDOR-SN protein 1	108	0	14.09	0	0	0	0	56.046	17.378	13.171	0	0	0
AT2G46900.1	unknown protein	71	0	0	0	0	0	0	0	0	0	0	69.586	6.5976
AT1G20960.1 (+1)	emb1507 - U5 small nuclear ribonucleoprotein helicase, putative	247	0	0	0	0	0	0	0	0	0	24.11	38.377	44.282
AT1G64880.1	Ribosomal protein S5 family protein	60	0	0	0	0	0	0	0	0	0	20.94	57.877	38.761
AT1G67700.1 (+2)	unknown protein	26	0	0	0	0	8.046	18.096	0	0	0	0	0	0
AT4G26840.1	SUM1, SUMO 1, SUMO1, ATSUMO1 - small ubiquitin-like modifier 1	11	6.6827	7.1806	4.7255	0	0	0	7.2661	12.449	77.696	0	0	0
AT5G45170.1	Haloacid dehalogenase-like hydrolase (HAD) superfamily protein	41	0	7.0449	0	0	0	0	17.481	14.165	2.3897	0	0	0
AT3G49680.2 (+1)	ATBCAT-3, BCAT3 - branched-chain aminotransferase 3	45	0	0	0	0	0	0	17.525	0	0	0	0	0
AT5G14660.1 (+1)	PDF1B, DEF2, ATDEF2 - peptide deformylase 1B	31	23.823	23.88	25.98	0	0	0	0	0	0	0	0	0
AT1G76850.1	SEC5A - exocyst complex component sec5	122	0	0	0	0	0	0	0	0	0	29.179	37.309	37.403
AT4G24770.1	RBP31, ATRBP31, CP31, ATRBP33 - 31-kDa RNA binding protein	36	0	0	0	0	0	0	0	0	0	40.111	46.138	9.2323
AT4G33520.3 (+1)	PAA1, HMA6 - P-type ATP-ase 1	100	1.7726	3.4501	3.6387	0	0	0	1.4001	4.4198	4.793	0	0	0
AT5G06060.1	NAD(P)-binding Rossmann-fold superfamily protein	28	0	0	7.3676	0	0	0	11.209	36.059	0	0	0	0
AT1G21640.1 (+1)	NADK2, ATNADK2 - NAD kinase 2	109	0	0	0	21.518	13.597	12.668	0	0	0	0	0	0
AT1G04420.1	NAD(P)-linked oxidoreductase superfamily protein	46	7.1684	0	0	0	0	0	13.712	29.426	0	0	0	0
AT4G30310.2	FGGY family of carbohydrate kinase	63	0	0	0	0	0	0	19.556	34.959	0	0	0	0
AT3G06850.1 (+1)	BCE2, LTA1, DIN3 - 2-oxoacid dehydrogenases acyltransferase family protein	53	0	0	0	27.682	29.904	10.835	0	0	0	0	0	0
AT5G42070.1	unknown protein	18	0	0	0	27.682	16.555	28.944	0	0	0	0	0	0
AT1G10370.1	GST30, ATGSTU17, GST30B, ERD9 - Glutathione S-transferase family protein	25	0	0	0	0	0	0	31.513	0	2.4837	0	0	0
AT1G10960.1	ATFD1, FD1 - ferredoxin 1	16	0	0	0	0	0	0	56.561	0	0	0	0	0
AT1G06690.1	NAD(P)-linked oxidoreductase superfamily protein	41	0	0	0	10.224	10.594	0	0	0	0	16.073	3.262	25.841
AT3G52730.1	ubiquinol-cytochrome C reductase UQCRX/QCR9-like family protein	8	0	0	0	0	0	0	0	0	0	20.098	12.633	38.761
AT2G35390.2 (+1)	Phosphoribosyltransferase family protein	44	0	0	0	12.3	21.807	18.084	0	0	0	8.0494	0	0
AT1G42480.1 (+1)	unknown protein	21	0	0	0	0	0	0	0	0	19.163	20.085	23.589	0
AT2G29960.2 (+1)	CYP5, ATCYP5, CYP19-4 - cyclophilin 5	21	26.007	21.152	16.711	0	0	0	0	8.7906	0	0	0	0
AT2G17410.1 (+1)	ARID/BRIGHT DNA-binding domain-containing protein	87	0	0	0	0	0	0	17.622	0	0	25.166	33.669	0
AT5G05780.1	RPN8A, AE3, ATHMOV34 - RP non-ATPase subunit 8A	35	0	0	0	19.896	12.069	13.562	0	0	0	23.145	0	0
AT2G17380.1	AP19 - associated protein 19	19	0	0	0	0	0	0	0	0	0	0	0	23.033
AT5G23010.1	MAM1, IMS3 - methylthioalkylmalate synthase 1	55	7.627	0	7.3676	12.802	16.555	7.1245	0	0	0	0	0	0
AT1G10200.1	WLIM1 - GATA type zinc finger transcription factor family protein	21	1.7429	14.849	15.822	0	8.046	0	0	6.3775	0	0	0	0
AT1G56560.1	Plant neutral invertase family protein	70	0	0	0	0	0	0	0	0	0	23.115	0	12.816
AT4G27430.1 (+1)	CIP7 - COP1-interacting protein 7	118	0	0	0	0	0	0	0	0	35.762	8.0241	34.451	2.4331
AT4G23710.1	VHA-G2, VAG2, VATG2 - vacuolar ATP synthase subunit G2	12	0	0	0	20.761	20.81	31.614	0	0	0	0	0	0
AT4G25900.1	Galactose mutarotase-like superfamily protein	36	19.339	17.63	33.412	0	0	0	0	0	0	0	0	0
AT3G02560.1 (+1)	Ribosomal protein S7e family protein	22	0	0	0	50.07	0	34.319	0	16.363	0	0	0	0
AT2G43910.1	ATHOL1, HOL1 - HARMLESS TO OZONE LAYER 1	25	0	0	0	0	0	0	44.043	0	0	0	0	0
AT2G24060.1	Translation initiation factor 3 protein	35	23.144	21.161	23.22	0	0	0	0	0	0	0	0	0
AT4G01850.1 (+1)	SAM-2, MAT2, SAM2, AtSAM2 - S-adenosylmethionine synthetase 2	43	57.347	53.803	89.276	0	0	0	0	0	0	0	0	0
AT3G48500.1 (+1)	PDE312, PTAC10 - Nucleic acid-binding, OB-fold-like protein	79	0	0	0	0	0	0	0	0	0	8.0494	56.672	48.278
AT5G01750.1 (+1)	Protein of unknown function (DUF567)	19	0	0	0	6.8159	8.046	18.096	0	0	0	2.1109	0	12.816
AT5G10560.1	Glycosyl hydrolase family protein	87	15.667	14.107	16.614	0	0	0	0	3.8821	0	0	0	0
AT1G31440.1	SH3 domain-containing protein	49	0	0	0	0	12.069	7.2488	0	0	12.095	0	0	2.4331
AT1G62180.1	APR2, APSR, PRH43, PRH, ATAPR2 - 5'adenylylphosphosulfate reductase 2	51	0	0	0	0	0	7.2232	0	0	0	24.11	0	16.61
AT3G01340.1 (+1)	Transducin/WD40 repeat-like superfamily protein	33	0	0	0	13.841	16.555	14.472	0	0	0	28.135	0	0
AT1G18210.1 (+1)	Calcium-binding EF-hand family protein	18	0	0	0	16.528	13.415	19.944	14.115	0	0	0	0	0
AT5G17770.1	ATCBR, CBR1, CBR - NADH:cytochrome B5 reductase 1	31	0	0	0	6.8159	0	8.1413	0	0	0	21.068	0	8.4298
AT5G47640.1	NF-YB2 - nuclear factor Y, subunit B2	21	0	0	0	0	0	0	0	0	63.099	0	0	20.114
AT2G32080.1 (+1)	PUR ALPHA-1 - purin-rich alpha 1	32	0	0	0	25.028	14.941	14.28	0	0	0	0	0	0
AT5G26667.1 (+2)	PYR6 - P-loop containing nucleoside triphosphate hydrolases superfamily protein	23	16.312	24.7	25.953	0	0	0	0	0	0	0	0	0
AT5G24690.1	Protein of unknown function (DUF3411)	57	0	0	0	13.841	0	0	0	0	0	0	12.562	25.841
AT4G29590.1	S-adenosyl-L-methionine-dependent methyltransferases superfamily protein	35	0	0	0	10.224	8.046	14.472	0	0	0	0	0	0
AT5G62840.1	Phosphoglycerate mutase family protein	32	0	0	0	13.841	8.046	0	0	0	0	16.073	0	13.025
AT1G32160.1	unknown protein	46	0	0	0	0	0	14.472	0	0	0	16.073	25.195	0
AT3G23450.1	unknown protein	35	0	0	0	25.139	10.601	18.084	0	0	0	5.2843	0	0
AT5G17380.1	Thiamine pyrophosphate dependent pyruvate decarboxylase family protein	61	0	7.0622	0	0	0	0	21.102	0	0	0	0	0
AT1G17720.1 (+1)	ATB BETA - Protein phosphatase 2A, regulatory subunit PR55	56	0	0	0	7.5458	0	0	0	0	0	32.147	0	0
AT5G09390.1 (+1)	CD2-binding protein-related	40	0	0	0	0	0	0	0	0	0	21.154	12.562	57.984
AT3G16370.1	GDSL-like Lipase/Acylhydrolase superfamily protein	38	0	0	0	24.274	12.069	7.2488	0	0	0	0	0	0
AT3G56910.1	PSRP5 - plastid-specific 50S ribosomal protein 5	16	0	0	0	24.169	12.069	18.096	0	0	0	0	0	0
AT2G26340.1	unknown protein	28	0	12.32	33.412	0	0	0	0	0	0	0	0	0
AT1G65290.1	mtACP2 - mitochondrial acyl carrier protein 2	14	0	0	0	0	0	0	0	0	0	8.0494	25.195	0
AT1G29260.1	PEX7, ATPEX7 - peroxin 7	35	0	0	0	0	0	0	0	0	0	23.041	25.195	12.816
AT5G65840.1	Thioredoxin superfamily protein	30	0	0	0	0	0	7.2488	0	0	0	20.098	0	22.836
AT4G10060.1	Beta-glucosidase, GBA2 type family protein	104	0	0	0	18.984	0	10.873	0	0	0	0	0	0
AT4G00860.1	ATOZI1, AT0ZI1 - Protein of unknown function (DUF1138)	9	0	0	0	10.537	29.853	17.14	0	0	0	0	0	0
AT1G77710.1	unknown protein	10	26.152	16.768	18.605	0	0	0	0	0	0	0	0	0
AT1G09830.1	Glycinamide ribonucleotide (GAR) synthetase	56	0	0	0	0	0	0	33.507	0	0	0	0	0
AT3G25800.1	PDF1, PR 65, PP2AA2 - protein phosphatase 2A subunit A2	66	0	0	0	25.139	16.555	18.072	10.254	0	0	0	0	0
AT5G16970.1	AT-AER, AER - alkenal reductase	38	0	0	0	0	0	0	20.996	25.951	0	0	0	0
AT3G03070.1	NADH-ubiquinone oxidoreductase-related	12	0	0	0	19.032	1.9941	27.117	0	0	0	0	0	0
AT3G53580.1	diaminopimelate epimerase family protein	39	0	12.424	0	0	0	0	28.022	0	0	0	0	0
AT2G19830.1	SNF7.2, VPS32 - SNF7 family protein	24	0	0	0	0	0	0	0	37.93	107.26	0	0	0
AT5G41670.1 (+1)	6-phosphogluconate dehydrogenase family protein	53	0	0	0	0	0	0	49.639	0	0	0	0	0
AT1G08550.1 (+1)	NPQ1, AVDE1 - non-photochemical quenching 1	52	0	0	0	0	0	0	41.944	0	0	0	0	0
AT1G02080.1 (+1)	transcription regulators	270	0	0	0	0	8.5092	7.2232	0	0	0	8.0241	26.824	25.841
AT2G38270.1	CXIP2, ATGRX2 - CAX-interacting protein 2	32	0	0	0	0	0	0	11.209	8.7906	19.163	0	0	0
AT5G03300.1	ADK2 - adenosine kinase 2	38	47.97	42.313	18.419	0	0	0	0	6.731	0	0	0	0
AT4G32640.1 (+1)	Sec23/Sec24 protein transport family protein	116	0	0	0	0	0	0	0	0	0	3.9453	0	25.556
AT5G53140.1	Protein phosphatase 2C family protein	46	0	0	0	0	0	0	14.071	0	0	0	0	0
AT1G14670.1 (+1)	Endomembrane protein 70 protein family	68	0	0	0	0	0	5.3365	0	0	0	6.065	18.949	10.486
AT1G02930.1 (+1)	ATGSTF6, GST1, ERD11, ATGSTF3, GSTF6, ATGST1 - glutathione S-transferase 6	23	5.5769	0	0	0	0	0	0	18.505	0	0	0	0
AT2G46820.1 (+1)	PTAC8, TMP14, PSAP, PSI-P - photosystem I P subunit	18	0	0	0	0	0	0	0	0	0	0	0	19.537
AT1G21080.1 (+1)	DNAJ heat shock N-terminal domain-containing protein	44	0	0	0	0	8.046	7.2488	0	0	0	20.94	0	0
AT1G68560.1	ATXYL1, XYL1, TRG1 - alpha-xylosidase 1	102	7.1684	24.683	7.4967	0	0	0	5.4849	0	0	0	0	0
AT5G42890.1	ATSCP2, SCP2 - sterol carrier protein 2	14	18.38	21.161	25.98	0	0	0	0	0	0	0	0	0
AT3G23400.1	FIB4 - Plastid-lipid associated protein PAP / fibrillin family protein	30	0	0	0	13.841	24.601	28.944	0	0	0	0	0	0
AT1G74070.1	Cyclophilin-like peptidyl-prolyl cis-trans isomerase family protein	34	22.193	24.692	18.613	0	0	0	0	0	0	0	0	0
AT5G15650.1	RGP2, ATRGP2 - reversibly glycosylated polypeptide 2	41	0	0	0	1.8061	0	0	23.835	0	0	0	0	0
AT2G25830.1	YebC-related	37	0	0	0	0	0	0	39.268	0	0	0	0	0
AT5G11580.1	Regulator of chromosome condensation (RCC1) family protein	61	0	0	0	0	0	0	0	0	0	0	5.0469	23.081
AT3G25070.1	RIN4 - RPM1 interacting protein 4	23	0	0	0	0	0	7.1607	0	0	0	10.008	0	3.5851
AT1G12000.1	Phosphofructokinase family protein	61	0	0	0	0	0	0	0	12.172	9.6271	0	0	0
AT5G35590.1	PAA1 - proteasome alpha subunit A1	27	0	0	0	6.8159	0	0	0	34.959	0	0	0	0
AT2G39930.1	ISA1, ATISA1 - isoamylase 1	89	0	0	0	13.138	0	0	0	0	0	8.0494	0	14.135
AT5G25100.1 (+1)	Endomembrane protein 70 protein family	74	0	0	0	0	0	0	0	0	0	15.243	30.8	35.893
AT3G47370.1 (+2)	Ribosomal protein S10p/S20e family protein	14	0	5.3854	3.8299	0	0	0	0	0	0	0	0	0
AT3G20810.1 (+1)	JMJD5 - 2-oxoglutarate (2OG) and Fe(II)-dependent oxygenase superfamily protein	47	0	0	0	0	0	0	0	0	0	29.234	26.826	39.956
AT4G33580.1 (+1)	ATBCA5, BCA5 - beta carbonic anhydrase 5	33	22.85	22.886	11.051	0	0	0	0	0	0	0	0	0
AT2G44640.1	unknown protein	50	0	0	0	7.0249	4.1764	0	0	0	0	0	18.949	9.2323
AT2G30520.1	RPT2 - Phototropic-responsive NPH3 family protein	66	0	0	0	0	0	0	0	0	0	2.0719	9.1635	21.244
AT4G02230.1	Ribosomal protein L19e family protein	24	0	0	0	35.467	42.489	56.946	0	0	0	0	0	0
AT5G19140.1	ATAILP1, AILP1 - Aluminium induced protein with YGL and LRDR motifs	25	0	0	1.8902	0	0	0	18.24	18.689	0	0	0	0
AT4G36130.1	Ribosomal protein L2 family	28	0	0	84.472	0	0	0	0	0	0	0	0	0
AT2G24090.1	Ribosomal protein L35	16	7.627	0	18.613	0	0	0	0	0	0	0	0	0
AT5G64460.1 (+5)	Phosphoglycerate mutase family protein	32	5.2396	0	9.2855	0	0	0	12.662	15.253	2.4678	0	0	0
AT2G34310.1 (+2)	unknown protein	26	0	0	0	0	0	0	0	0	11.838	0	0	0
AT5G66720.1 (+1)	Protein phosphatase 2C family protein	44	0	0	0	10.224	19.753	15.31	0	0	0	0	0	0
AT1G18540.1	Ribosomal protein L6 family protein	26	0	0	0	11.015	31.138	68.761	0	0	0	0	0	0
AT3G58510.1 (+2)	DEA(D/H)-box RNA helicase family protein	66	0	0	0	12.843	13.812	19.774	0	0	0	0	0	0
AT2G44050.1	COS1 - 6,7-dimethyl-8-ribityllumazine synthase / DMRL synthase / lumazine synthase / riboflavin synthase	24	0	0	0	0	0	0	20.467	0	0	0	0	0
AT2G43945.1	unknown protein	32	0	0	0	0	0	0	25.28	0	0	0	0	0
AT1G09640.1	Translation elongation factor EF1B, gamma chain	47	0	0	0	0	0	0	74.6	0	3.7018	0	0	0
AT4G25890.1	60S acidic ribosomal protein family	12	0	0	0	0	0	0	6.5697	8.689	20.456	0	0	0
AT1G63970.1 (+1)	ISPF, MECPS - isoprenoid F	25	7.1684	14.107	14.864	0	0	0	0	0	9.6271	0	0	0
AT3G15660.1 (+1)	ATGRX4, GRX4 - glutaredoxin 4	19	0	7.0449	13.816	0	0	0	0	0	2.473	0	0	0
AT1G80480.1	PTAC17 - plastid transcriptionally active 17	49	0	0	0	0	0	0	4.7978	0	0	22.963	2.5414	7.2347
AT4G32760.1 (+1)	ENTH/VHS/GAT family protein	73	0	0	0	20.657	20.578	7.2232	0	0	0	0	0	0
AT3G59840.1	unknown protein	10	0	0	0	0	20.578	25.32	0	0	0	0	0	0
AT4G29680.1	Alkaline-phosphatase-like family protein	55	0	0	0	0	0	0	8.5862	0	0	0	0	0
AT1G27450.1 (+2)	APT1, ATAPT1 - adenine phosphoribosyl transferase 1	26	0	0	0	0	0	0	30.797	8.689	9.6271	0	0	0
AT2G44310.1	Calcium-binding EF-hand family protein	16	0	0	0	0	0	0	25.28	0	28.745	0	0	0
AT1G67280.1	Glyoxalase/Bleomycin resistance protein/Dioxygenase superfamily protein	39	0	0	0	0	0	0	30.765	5.2758	0	0	0	0
AT1G11360.1 (+3)	Adenine nucleotide alpha hydrolases-like superfamily protein	27	0	0	0	0	0	0	25.86	0	28.745	0	0	0
AT5G12250.1	TUB6 - beta-6 tubulin	51	0	0	0	72.603	0	30.829	0	0	0	72.881	17.79	78.451
AT2G45810.1	DEA(D/H)-box RNA helicase family protein	60	0	0	0	1.7854	12.069	0	0	0	0	0	0	0
AT2G21130.1	Cyclophilin-like peptidyl-prolyl cis-trans isomerase family protein	18	40.741	88.798	92.586	0	0	0	0	0	60.067	0	0	0
AT1G70580.1 (+3)	AOAT2, GGT2 - alanine-2-oxoglutarate aminotransferase 2	53	77.927	18.957	0	0	0	0	14.018	0	0	0	0	0
AT1G21350.1 (+2)	Thioredoxin superfamily protein	17	0	0	1.7921	0	0	0	1.3351	21.824	21.392	0	0	0
AT2G21580.1 (+1)	Ribosomal protein S25 family protein	12	0	0	0	0	49.512	0	0	0	0	0	0	0
AT4G38550.1	Arabidopsis phospholipase-like protein (PEARLI 4) family	70	0	0	0	0	0	0	0	0	0	22.071	29.016	35.903
AT1G22920.1	CSN5A, JAB1, AJH1 - COP9 signalosome 5A	40	0	0	0	0	0	21.657	0	0	0	20.02	0	0
AT5G64140.1	RPS28 - ribosomal protein S28	7	4.8227	13.394	4.7502	0	0	0	0	0	0	0	0	0
AT5G42765.1	unknown protein	25	0	0	0	0	0	0	7.172	0	14.441	0	0	0
AT4G31120.2	PRMT5 - SHK1 binding protein 1	65	0	0	0	0	0	0	0	0	0	16.048	10.22	8.4298
AT1G20010.1	TUB5 - tubulin beta-5 chain	50	0	0	0	0	0	0	0	0	0	167.52	71.164	84.655
AT4G26300.1	emb1027 - Arginyl-tRNA synthetase, class Ic	72	0	0	0	0	0	0	30.249	0	13.109	0	0	0
AT1G78060.1	Glycosyl hydrolase family protein	84	0	0	0	0	0	0	0	59.003	0	0	0	0
AT1G29470.1 (+1)	S-adenosyl-L-methionine-dependent methyltransferases superfamily protein	87	0	0	0	3.4036	0	7.2488	0	0	0	7.9035	12.633	12.816
AT5G22510.1	INV-E, At-A/N-InvE - alkaline/neutral invertase	69	0	0	0	17.04	0	7.2488	0	0	0	0	0	3.5833
AT1G64740.1	TUA1 - alpha-1 tubulin	50	0	0	0	0	0	0	0	0	0	122.23	151.68	192.45
AT5G38060.1	unknown protein	15	1.633	17.63	20.428	0	0	0	0	0	3.2925	0	0	0
AT2G05830.1 (+3)	NagB/RpiA/CoA transferase-like superfamily protein	40	5.6099	11.402	1.7606	0	0	0	0	0	0	0	0	0
AT4G01290.1 (+1)	unknown protein	109	0	0	0	17.249	19.773	18.976	0	0	0	0	0	0
AT2G34970.1	Trimeric LpxA-like enzyme	82	0	0	0	0	0	0	0	0	0	21.081	28.455	42.222
AT4G27520.1	ENODL2, AtENODL2 - early nodulin-like protein 2	35	0	0	0	0	20.81	27.953	0	0	0	0	0	0
AT3G27890.1	NQR - NADPH:quinone oxidoreductase	22	0	0	0	18.013	10.4	17.245	0	0	0	0	0	0
AT4G39970.1	Haloacid dehalogenase-like hydrolase (HAD) superfamily protein	35	0	0	0	0	0	0	25.16	0	20.358	0	0	0
AT5G50810.1	TIM8 - translocase inner membrane subunit 8	9	0	0	0	20.761	0	22.563	0	0	0	0	0	0
AT5G21160.1 (+2)	LA RNA-binding protein	91	0	0	0	0	0	0	5.7241	0	0	0	0	0
AT5G58220.1	TTL - transthyretin-like protein	36	0	0	0	0	0	10.835	0	0	0	16.048	0	25.841
AT3G01510.1	LSF1 - like SEX4 1	66	0	0	0	17.353	8.046	7.2232	3.2883	0	0	0	0	0
AT1G70320.1	UPL2 - ubiquitin-protein ligase 2	404	0	0	0	0	0	0	0	0	0	72.343	22.146	6.0827
AT1G58270.1	ZW9 - TRAF-like family protein	45	0	0	0	20.761	8.5092	8.9952	0	0	0	0	0	0
AT3G58680.1	MBF1B, ATMBF1B - multiprotein bridging factor 1B	16	18.609	17.63	12.881	0	0	0	0	0	0	0	0	0
AT2G39990.1	EIF2, AteIF3f, eIF3F - eukaryotic translation initiation factor 2	32	0	0	0	21.72	3.1273	14.594	0	0	0	3.1232	0	0
AT1G13060.1	PBE1 - 20S proteasome beta subunit E1	30	15.747	2.5149	1.7397	0	0	0	0	31.354	0	0	0	0
AT4G33650.1 (+1)	ADL2, DRP3A - dynamin-related protein 3A	90	0	0	0	24.169	0	14.446	0	0	0	0	0	0
AT5G14540.1	unknown protein	59	0	0	0	12.739	12.764	26.166	0	0	0	0	0	0
AT1G79650.4 (+3)	RAD23B - Rad23 UV excision repair protein family	42	0	0	0	0	0	0	32.299	0	2.4678	0	0	0
AT3G14100.1	RNA-binding (RRM/RBD/RNP motifs) family protein	47	0	0	0	0	1.9943	7.2232	0	0	0	17.066	5.9582	6.0182
AT1G57770.1	FAD/NAD(P)-binding oxidoreductase family protein	62	7.627	0	0	0	0	0	0	8.7906	0	0	0	8.9656
AT3G54170.1	ATFIP37, FIP37 - FKBP12 interacting protein 37	37	0	0	0	0	0	0	0	0	0	0	0	34.765
AT4G31985.1	Ribosomal protein L39 family protein	6	0	0	0	13.841	9.0822	16.262	0	0	0	0	0	0
AT1G26460.1	Tetratricopeptide repeat (TPR)-like superfamily protein	70	0	0	0	9.4104	0	0	0	0	0	20.085	2.5504	0
AT3G55750.1	Ribosomal protein L35Ae family protein	13	0	0	0	10.224	18.601	22.6	0	0	0	0	0	0
AT5G11710.1	ENTH/VHS family protein	61	0	0	0	20.657	0	14.446	0	0	0	0	0	0
ATCG00670.1	CLPP1, PCLPP - plastid-encoded CLP P	22	0	0	0	19.897	0	5.3365	16.813	0	0	0	0	0
AT2G21060.1	ATGRP2B, ATCSP4, GRP2B - glycine-rich protein 2B	19	7.1684	10.593	18.613	0	0	0	0	0	0	0	0	0
AT5G11170.1 (+3)	DEAD/DEAH box RNA helicase family protein	48	0	0	0	0	0	0	27.307	0	0	1.9844	0	0
AT1G15340.1	MBD10 - methyl-CPG-binding domain 10	42	0	0	0	0	0	0	4.2284	0	44.147	0	0	0
AT4G15802.1	HSBP, AtHSBP - heat shock factor binding protein	9	0	0	0	14.662	16.555	18.938	0	0	0	0	0	0
AT4G20980.1 (+3)	Eukaryotic translation initiation factor 3 subunit 7 (eIF-3)	67	0	0	0	20.761	1.9941	14.472	0	0	0	0	0	0
AT3G16780.1	Ribosomal protein L19e family protein	24	0	0	0	31.194	34.159	43.416	0	0	0	0	0	0
AT4G38930.1 (+1)	Ubiquitin fusion degradation UFD1 family protein	35	0	0	0	14.05	5.1387	10.835	0	0	0	0	0	0
AT1G72640.1 (+1)	NAD(P)-binding Rossmann-fold superfamily protein	34	0	0	0	0	0	0	43.627	0	0	0	0	0
AT5G60980.1 (+1)	Nuclear transport factor 2 (NTF2) family protein with RNA binding (RRM-RBD-RNP motifs) domain	49	0	0	0	6.8159	1.9943	7.2488	8.5862	0	9.5362	0	0	0
AT2G27730.1	copper ion binding	12	0	0	0	6.8159	8.046	18.096	0	0	0	0	0	0
AT1G54010.1	GDSL-like Lipase/Acylhydrolase superfamily protein	43	0	0	0	7.0249	16.555	21.708	0	0	0	0	0	0
AT4G03430.1	STA1, EMB2770 - pre-mRNA splicing factor-related	116	0	0	0	0	0	0	0	0	14.441	8.0494	7.1767	25.841
AT3G25770.1	AOC2 - allene oxide cyclase 2	28	0	0	0	23.247	0	8.1193	0	0	0	0	0	0
AT5G66030.1 (+1)	ATGRIP, GRIP - Golgi-localized GRIP domain-containing protein	90	0	0	0	8.6221	16.555	27.092	0	0	0	0	0	0
AT1G22410.1	Class-II DAHP synthetase family protein	58	0	0	0	22.772	0	0	0	0	0	0	0	0
AT1G23130.1	Polyketide cyclase/dehydrase and lipid transport superfamily protein	18	0	0	0	0	0	0	17.418	0	9.5362	0	0	0
AT4G39690.1	unknown protein	71	0	0	0	19.032	1.9941	24.435	0	0	0	0	0	0
AT3G63170.1	Chalcone-flavanone isomerase family protein	30	0	0	0	0	0	0	11.909	30.284	0	0	0	0
AT1G66070.1 (+1)	Translation initiation factor eIF3 subunit	26	0	0	0	0	0	0	25.154	0	20.269	0	0	0
AT2G23820.2	Metal-dependent phosphohydrolase	28	0	7.0449	13.865	0	0	0	0	0	40.53	0	0	0
AT3G18640.1	Zinc finger C-x8-C-x5-C-x3-H type family protein	76	0	0	0	0	0	0	0	0	0	20.123	3.8256	17.66
AT2G45790.1	ATPMM, PMM - phosphomannomutase	28	0	0	0	0	0	0	25.28	0	3.7018	0	0	0
AT5G10920.1	L-Aspartase-like family protein	58	0	0	0	0	0	0	27.887	0	0	0	0	0
AT1G09620.1	ATP binding;leucine-tRNA ligases;aminoacyl-tRNA ligases;nucleotide binding;ATP binding;aminoacyl-tRNA ligases	123	0	0	0	0	0	0	42.65	0	0	0	0	0
AT2G28290.1 (+2)	SYD, CHR3 - P-loop containing nucleoside triphosphate hydrolases superfamily protein	390	0	0	0	0	0	0	0	0	9.5362	18.048	3.262	0
AT1G03220.1	Eukaryotic aspartyl protease family protein	46	7.1684	0	7.4967	0	0	0	0	17.48	9.5362	0	0	0
AT5G46430.1 (+1)	Ribosomal protein L32e	15	7.1684	17.63	7.4967	0	0	0	0	0	0	0	0	0
AT1G01170.1 (+1)	Protein of unknown function (DUF1138)	9	0	0	0	14.662	18.49	14.472	0	0	0	0	0	0
AT1G75460.1	ATP-dependent protease La (LON) domain protein	31	0	0	0	17.249	8.046	14.472	0	0	0	0	0	0
AT2G01190.1	Octicosapeptide/Phox/Bem1p family protein	77	0	0	0	0	0	0	0	0	0	5.8172	23.425	6.0397
AT1G15950.1	CCR1, IRX4, ATCCR1 - cinnamoyl coa reductase 1	37	0	0	0	0	0	0	8.2273	17.48	7.0875	0	0	0
AT3G60600.1	VAP27-1, VAP, (AT)VAP, VAP27 - vesicle associated protein	28	0	0	0	0	0	0	0	0	0	3.9453	17.144	39.977
AT3G14290.1	PAE2 - 20S proteasome alpha subunit E2	26	0	0	0	13.841	0	10.873	16.933	0	0	0	0	0
AT1G33240.1	AT-GTL1, AT-GTL2, GTL1 - GT-2-like 1	74	0	0	0	0	0	0	0	0	0	24.11	26.471	29.447
AT1G29700.1	Metallo-hydrolase/oxidoreductase superfamily protein	38	0	0	0	7.7087	11.139	11.731	0	0	0	0	0	0
AT5G16050.1	GRF5, GF14 UPSILON - general regulatory factor 5	30	0	0	0	0	0	0	57.245	0	0	0	0	0
AT3G19770.1	ATVPS9A, VPS9A, VPS9 - Vacuolar sorting protein 9 (VPS9) domain	58	0	0	0	0	8.5092	13.64	0	0	0	10.146	0	0
AT1G09795.1	ATATP-PRT2, HISN1B, ATP-PRT2 - ATP phosphoribosyl transferase 2	45	0	0	0	7.0249	0	0	22.418	0	0	0	0	0
AT4G20150.1	unknown protein	9	0	0	0	10.224	8.5092	21.708	0	0	0	0	0	0
ATCG00350.1	PSAA - Photosystem I, PsaA/PsaB protein	83	0	0	0	4.4493	0	0	0	0	0	17.115	0	0
AT3G52180.1	ATPTPKIS1, DSP4, SEX4, ATSEX4 - dual specificity protein phosphatase (DsPTP1) family protein	43	0	0	0	0	0	0	16.694	0	0	0	0	0
AT5G64130.1	cAMP-regulated phosphoprotein 19-related protein	12	1.9751	17.655	14.864	0	0	0	0	0	0	0	0	0
AT1G35420.1 (+1)	alpha/beta-Hydrolases superfamily protein	34	0	0	0	0	0	0	42.093	0	0	0	0	0
AT1G11930.1 (+1)	Predicted pyridoxal phosphate-dependent enzyme, YBL036C type	28	13.779	7.0449	18.548	0	0	0	0	0	0	0	0	0
AT1G09010.1	glycoside hydrolase family 2 protein	108	0	0	0	13.841	18.718	10.873	0	0	0	0	0	0
AT4G14030.1 (+1)	SBP1 - selenium-binding protein 1	54	7.1684	0	0	0	0	0	15.524	0	0	0	0	0
AT4G33640.1	unknown protein	10	0	0	0	0	0	0	14.071	0	0	0	0	0
AT1G01510.1	AN - NAD(P)-binding Rossmann-fold superfamily protein	70	0	0	0	0	0	0	0	0	0	12.036	31.477	21.543
AT3G23390.1 (+1)	Zinc-binding ribosomal protein family protein	12	0	0	0	0	0	14.472	0	0	0	0	0	0
AT4G26110.1 (+1)	NAP1;1, ATNAP1;1 - nucleosome assembly protein1;1	43	0	0	0	0	0	0	0	0	0	16.099	70.169	23.886
AT5G62670.1	AHA11, HA11 - H(+)-ATPase 11	105	0	0	0	33.794	63.312	0	0	0	0	0	0	0
AT3G50370.1	unknown protein	236	0	0	0	0	0	0	0	0	0	5.931	25.125	28.77
AT3G23700.1	Nucleic acid-binding proteins superfamily	43	0	0	0	0	0	0	12.568	0	9.6271	0	0	0
AT4G26555.1	FKBP-like peptidyl-prolyl cis-trans isomerase family protein	23	15.741	14.969	18.548	0	0	0	0	0	0	0	0	0
AT5G47390.1	myb-like transcription factor family protein	40	0	0	0	0	0	0	5.4849	0	0	8.0241	2.5504	0
AT1G52690.1 (+1)	Late embryogenesis abundant protein (LEA) family protein	18	12.645	10.567	22.296	0	0	0	0	0	0	0	0	0
AT5G36160.1	Tyrosine transaminase family protein	46	0	0	0	0	0	0	21.583	6.7122	10.731	0	0	0
AT4G00490.1	BAM2, BMY9 - beta-amylase 2	61	0	0	0	0	0	0	40.691	0	0	0	0	0
AT1G06070.1	Basic-leucine zipper (bZIP) transcription factor family protein	47	0	0	0	0	0	0	0	0	0	0	0	13.025
AT1G56050.1	GTP-binding protein-related	46	0	0	0	0	0	0	19.556	0	16.69	0	0	0
AT1G26560.1	BGLU40 - beta glucosidase 40	58	0	0	0	10.537	0	0	0	0	0	8.0494	12.633	3.5762
AT2G40600.1	appr-1-p processing enzyme family protein	27	0	0	0	0	0	0	0	0	32.15	0	0	0
AT1G15230.1	unknown protein	16	0	0	0	0	0	0	5.4849	0	49.103	0	0	0
AT1G70890.1	MLP43 - MLP-like protein 43	18	0	0	0	0	0	0	11.373	0	43.049	0	0	0
AT1G11840.1 (+4)	ATGLX1, GLX1 - glyoxalase I homolog	32	0	0	0	0	0	0	30.117	0	0	0	0	0
AT2G18110.1	Translation elongation factor EF1B/ribosomal protein S6 family protein	25	0	0	0	0	0	0	56.335	0	6.1696	0	0	0
AT5G56350.1	Pyruvate kinase family protein	54	0	0	0	0	0	0	8.2273	30.564	0	0	0	0
AT3G07480.1	2Fe-2S ferredoxin-like superfamily protein	18	7.627	7.0449	0	6.8159	0	0	0	0	0	0	0	0
AT3G50590.1	Transducin/WD40 repeat-like superfamily protein	176	0	0	0	7.0249	0	9.0081	0	0	0	0	0	0
AT2G02740.1 (+1)	ATWHY3, PTAC11, WHY3 - ssDNA-binding transcriptional regulator	30	0	0	0	10.537	0	14.472	0	0	0	16.073	0	0
AT4G23850.1	LACS4 - AMP-dependent synthetase and ligase family protein	75	0	0	0	0	0	0	0	0	0	9.0904	22.645	11.212
AT2G37970.1	SOUL-1 - SOUL heme-binding family protein	25	0	0	0	13.841	16.555	21.695	0	0	0	0	0	0
AT1G19870.1	iqd32 - IQ-domain 32	87	0	0	0	0	0	0	0	0	0	8.0241	40.798	28.252
AT5G26830.1	Threonyl-tRNA synthetase	81	0	0	0	0	0	0	21.622	8.7906	9.5362	0	0	0
AT3G23600.1 (+1)	alpha/beta-Hydrolases superfamily protein	26	0	0	0	0	0	0	20.481	5.6558	13.243	0	0	0
AT1G62380.1	ACO2, ATACO2 - ACC oxidase 2	36	0	0	0	0	0	0	22.418	0	0	0	0	0
AT4G21445.1	unknown protein	18	0	0	0	0	0	0	8.5862	0	0	0	0	0
AT2G17190.1	ubiquitin family protein	57	0	0	0	27.264	0	55.968	0	0	0	0	0	0
AT3G01090.2 (+2)	AKIN10, KIN10 - SNF1 kinase homolog 10	61	0	0	0	0	8.5092	0	0	0	0	0	5.0918	3.6496
AT5G50250.1	CP31B - chloroplast RNA-binding protein 31B	32	0	0	0	0	0	0	6.3963	0	12.017	0	0	0
AT3G62530.1	ARM repeat superfamily protein	25	0	0	0	0	0	0	5.4849	0	9.5362	0	0	0
AT4G05420.1 (+1)	DDB1A - damaged DNA binding protein 1A	121	0	0	0	0	0	0	0	13.033	0	0	2.5414	0
AT2G47380.1	Cytochrome c oxidase subunit Vc family protein	7	0	0	0	13.841	16.555	7.2488	0	0	0	0	0	0
AT2G03820.1	nonsense-mediated mRNA decay NMD3 family protein	59	0	0	0	0	0	0	0	0	0	16.073	30.287	29.447
AT3G15356.1	Legume lectin family protein	30	9.4859	7.0449	3.6072	0	0	0	0	0	0	0	0	0
AT5G53850.2	haloacid dehalogenase-like hydrolase family protein	57	0	1.7984	0	0	0	0	1.4839	4.5288	25.306	0	0	0
AT5G40870.1	ATUK/UPRT1, UKL1, UK/UPRT1 - uridine kinase/uracil phosphoribosyltransferase 1	54	0	0	0	0	0	7.2488	0	0	0	0	0	0
AT3G62940.1 (+2)	Cysteine proteinases superfamily protein	36	0	16.708	22.296	0	0	0	0	0	0	0	0	0
AT3G12580.1	HSP70, ATHSP70 - heat shock protein 70	71	0	0	0	0	0	0	186.97	0	0	0	0	0
AT4G32330.1 (+2)	TPX2 (targeting protein for Xklp2) protein family	48	0	0	14.864	0	0	0	11.876	0	19.163	0	0	0
AT3G47610.1	transcription regulators;zinc ion binding	45	0	0	0	1.6269	0	7.2232	0	0	0	0	0	0
AT2G32240.1	unknown protein	149	0	0	0	10.496	0	27.046	0	0	0	0	0	0
AT2G18250.1	ATCOAD, COAD - 4-phosphopantetheine adenylyltransferase	19	10.753	13.163	0	0	0	0	0	0	0	0	0	0
AT1G80410.1 (+1)	EMB2753 - tetratricopeptide repeat (TPR)-containing protein	102	0	0	0	0	0	0	30.63	0	0	0	0	0
AT5G25540.1	CID6 - CTC-interacting domain 6	19	0	0	0	7.928	8.5092	1.8345	0	0	0	4.154	0	0
AT3G13990.1 (+1)	Kinase-related protein of unknown function (DUF1296)	92	0	0	0	0	0	0	0	0	0	12.074	0	27.641
AT5G23300.1	PYRD - pyrimidine d	49	0	0	0	0	0	0	0	0	0	13.96	0	0
AT1G67680.1	SRP72 RNA-binding domain	73	0	0	0	0	0	0	7.0172	0	0	0	0	0
AT3G18060.1	transducin family protein / WD-40 repeat family protein	66	15.525	0	0	0	0	0	15.366	0	0	0	0	0
AT3G06610.1	DNA-binding enhancer protein-related	13	12.499	7.0622	21.324	0	0	0	0	0	0	0	0	0
AT3G25230.1 (+1)	ROF1, ATFKBP62, FKBP62 - rotamase FKBP 1	61	0	3.4762	4.6338	0	0	0	8.5862	0	0	0	0	0
AT3G55610.1	P5CS2 - delta 1-pyrroline-5-carboxylate synthase 2	79	0	0	0	0	0	0	70.803	0	0	0	0	0
AT1G74910.3 (+2)	ADP-glucose pyrophosphorylase family protein	43	0	0	0	0	0	0	25.869	0	0	0	0	0
AT1G31160.1	HINT 2 - HISTIDINE TRIAD NUCLEOTIDE-BINDING 2	20	7.627	14.107	0	0	0	0	0	0	0	0	0	0
AT5G62810.1	PEX14, ATPEX14, PED2 - peroxin 14	56	0	0	0	13.841	20.81	14.472	0	0	0	0	0	0
AT3G53980.1 (+1)	Bifunctional inhibitor/lipid-transfer protein/seed storage 2S albumin superfamily protein	12	0	0	0	0	0	0	0	0	9.6271	0	0	0
AT4G28706.4 (+1)	pfkB-like carbohydrate kinase family protein	47	0	0	0	0	0	0	0	0	23.977	0	0	0
AT5G54440.1	CLUB, AtTRS130 - CLUB	141	0	0	0	0	0	3.5048	0	0	0	0	3.3989	20.418
AT4G15110.1	CYP97B3 - cytochrome P450, family 97, subfamily B, polypeptide 3	65	0	0	0	2.7092	0	0	0	0	0	8.0241	0	0
AT1G76890.2	GT2, AT-GT2 - Duplicated homeodomain-like superfamily protein	66	0	0	0	0	0	0	0	0	0	16.213	5.9582	23.86
AT1G53850.1 (+1)	PAE1, ATPAE1 - 20S proteasome alpha subunit E1	26	0	0	0	0	16.092	0	0	0	0	0	0	0
AT2G32810.1	BGAL9 - beta galactosidase 9	99	1.7726	6.0662	3.5842	0	0	0	0	0	0	0	0	0
AT4G39660.1	AGT2 - alanine:glyoxylate aminotransferase 2	52	0	0	0	0	0	0	5.7241	0	0	0	0	0
AT4G32720.1 (+1)	AtLa1, La1 - La protein 1	48	0	0	0	0	0	0	25.28	0	19.163	0	0	0
AT5G19240.1	Glycoprotein membrane precursor GPI-anchored	21	0	0	19.558	0	0	0	0	0	37.039	0	0	0
AT1G72160.1	Sec14p-like phosphatidylinositol transfer family protein	56	0	0	0	0	0	0	22.311	0	0	0	0	0
AT3G26450.1	Polyketide cyclase/dehydrase and lipid transport superfamily protein	18	0	0	0	0	0	0	24.501	2.2004	0	0	0	0
AT3G59920.1	ATGDI2, GDI2 - RAB GDP dissociation inhibitor 2	50	0	0	0	0	0	0	29.882	0	0	0	0	0
AT1G48860.1 (+1)	RNA 3'-terminal phosphate cyclase/enolpyruvate transferase, alpha/beta	56	0	0	0	0	0	0	33.747	0	0	0	0	0
AT3G11820.1	SYP121, AT-SYR1, ATSYP121, SYR1, ATSYR1, PEN1 - syntaxin of plants 121	38	0	0	0	0	12.47	14.472	0	0	0	0	0	0
AT1G67360.1 (+1)	Rubber elongation factor protein (REF)	26	0	0	0	0	0	0	0	0	0	8.0494	12.344	15.427
AT3G13290.1	VCR - varicose-related	146	0	0	0	23.856	0	24.441	0	0	0	0	0	0
AT2G07360.1 (+1)	SH3 domain-containing protein	130	0	0	0	0	0	0	0	0	0	12.034	16.176	15.725
AT2G30950.1	VAR2, FTSH2 - FtsH extracellular protease family	74	0	0	0	7.8573	0	0	0	0	0	0	0	0
AT3G16830.1	TPR2 - TOPLESS-related 2	125	0	0	0	0	0	37.076	0	0	0	36.222	0	7.1702
AT5G42740.1	Sugar isomerase (SIS) family protein	62	0	0	0	0	0	0	26.544	0	0	0	0	0
AT4G08520.1	SNARE-like superfamily protein	20	0	0	0	0	0	0	0	0	0	10.106	0	21.916
AT4G17720.1	RNA-binding (RRM/RBD/RNP motifs) family protein	34	0	0	0	10.537	0	10.873	0	0	0	2.1137	0	0
AT5G60540.1	EMB2407, ATPDX2, PDX2 - pyridoxine biosynthesis 2	27	0	0	0	5.0978	16.555	7.2488	0	0	0	4.0788	0	0
AT2G26210.1 (+2)	Ankyrin repeat family protein	20	0	0	14.864	0	0	0	0	0	2.3897	0	0	0
AT1G13020.1	EIF4B2 - eukaryotic initiation factor 4B2	59	0	0	0	0	0	0	0	0	14.441	0	25.195	13.025
AT2G34460.1	NAD(P)-binding Rossmann-fold superfamily protein	30	0	0	0	6.8159	0	0	0	0	0	8.0241	0	0
AT4G27585.1	SPFH/Band 7/PHB domain-containing membrane-associated protein family	45	0	0	0	0	8.046	5.3653	0	0	0	0	0	0
AT3G02760.1	Class II aaRS and biotin synthetases superfamily protein	98	0	0	0	0	0	0	5.4849	13.033	14.304	0	0	0
AT5G42220.1	Ubiquitin-like superfamily protein	93	0	0	0	7.0249	8.5092	22.613	0	0	0	0	0	0
AT2G01140.1	Aldolase superfamily protein	42	0	0	0	0	0	0	25.16	0	26.471	0	0	0
AT2G31725.1	Eukaryotic protein of unknown function (DUF842)	17	0	0	0	20.761	0	15.309	0	0	0	0	0	0
AT5G63860.1	UVR8 - Regulator of chromosome condensation (RCC1) family protein	47	0	0	0	0	0	0	17.394	0	0	0	0	0
AT4G29120.1	6-phosphogluconate dehydrogenase family protein	35	0	2.59	0	0	0	0	16.813	0	0	0	0	0
AT1G05350.1	NAD(P)-binding Rossmann-fold superfamily protein	47	0	0	0	0	0	0	23.058	0	16.516	0	0	0
AT3G16640.1	TCTP - translationally controlled tumor protein	19	0	0	0	0	0	0	34.942	0	0	0	0	0
AT5G20500.1	Glutaredoxin family protein	15	10.753	0	0	0	0	0	0	0	0	0	0	0
AT5G42970.1	COP8, FUS4, EMB134, COP14, CSN4, FUS8, ATS4 - Proteasome component (PCI) domain protein	45	0	0	0	0	0	3.6455	0	0	0	5.9179	0	16.324
AT3G11910.1 (+1)	UBP13 - ubiquitin-specific protease 13	131	0	0	0	0	0	0	0	0	0	32.087	18.844	0
AT1G15280.1 (+1)	CASC3/Barentsz eIF4AIII binding	63	0	0	0	0	0	0	0	0	0	0	25.358	4.8232
AT5G65720.1	ATNIFS1, NIFS1, NFS1, ATNFS1 - nitrogen fixation S (NIFS)-like 1	50	0	7.0622	0	6.8159	0	0	0	0	0	0	0	0
AT1G17160.1 (+1)	pfkB-like carbohydrate kinase family protein	40	7.1684	10.593	11.088	0	0	0	0	0	0	0	0	0
AT3G44100.1	MD-2-related lipid recognition domain-containing protein	16	7.1684	0	0	0	0	0	0	8.689	0	0	0	0
AT1G06210.1	ENTH/VHS/GAT family protein	43	0	0	0	0	0	0	23.832	0	0	2.1137	0	0
AT1G53310.1 (+2)	ATPPC1, PEPC1, ATPEPC1, PPC1 - phosphoenolpyruvate carboxylase 1	110	0	0	0	0	0	0	71.357	0	0	0	0	0
AT3G14990.1	Class I glutamine amidotransferase-like superfamily protein	42	0	0	0	0	0	0	33.547	0	0	0	0	0
AT3G07390.1	AIR12 - auxin-responsive family protein	28	0	0	0	13.841	16.555	14.472	0	0	0	0	0	0
AT3G53560.1	Tetratricopeptide repeat (TPR)-like superfamily protein	39	0	7.0622	0	0	0	0	5.7241	0	0	0	0	0
AT5G64370.1	BETA-UP, PYD3 - beta-ureidopropionase	46	0	0	0	22.566	0	1.8835	0	0	0	0	0	0
AT4G04800.1	ATMSRB3, MSRB3 - methionine sulfoxide reductase B3	19	0	0	11.051	0	0	0	0	0	0	0	0	0
AT3G18860.1 (+1)	transducin family protein / WD-40 repeat family protein	84	0	0	0	0	0	0	6.8441	0	0	12.853	0	0
AT3G54350.1 (+2)	emb1967 - Forkhead-associated (FHA) domain-containing protein	78	0	0	0	0	0	0	0	0	0	0	37.793	18.958
AT3G10920.1 (+1)	MSD1, MEE33, ATMSD1 - manganese superoxide dismutase 1	25	6.152	0	1.7921	0	0	0	8.3061	6.4531	0	0	0	0
AT2G33340.1 (+2)	MAC3B - MOS4-associated complex 3B	57	0	0	0	0	5.9545	10.835	0	0	0	12.036	0	0
AT1G01800.1	NAD(P)-binding Rossmann-fold superfamily protein	32	0	0	8.42	0	0	0	1.3351	2.2004	0	0	0	0
AT1G10390.1 (+1)	Nucleoporin autopeptidase	106	0	0	0	0	20.578	10.873	0	0	0	0	0	0
AT4G31300.1 (+2)	PBA1 - N-terminal nucleophile aminohydrolases (Ntn hydrolases) superfamily protein	25	0	0	0	0	17.295	5.3653	0	0	0	0	0	0
AT1G55805.1	BolA-like family protein	18	5.2657	14.09	0	0	0	0	0	0	0	0	0	0
AT1G36390.1 (+1)	Co-chaperone GrpE family protein	31	0	0	0	0	0	0	0	48.043	0	0	0	0
AT5G35620.1	LSP1, EIF(ISO)4E, LSP, EIF4E2, eIFiso4E - Eukaryotic initiation factor 4E protein	23	0	0	0	0	8.046	7.2232	0	0	0	4.154	0	0
AT4G20890.1	TUB9 - tubulin beta-9 chain	50	0	0	0	14.702	0	0	0	0	0	0	67.064	90.731
AT5G24460.1	unknown protein	33	10.131	0	9.3869	0	0	0	0	0	0	0	0	0
AT5G56680.1	SYNC1, EMB2755, SYNC1 ARATH - Class II aminoacyl-tRNA and biotin synthetases superfamily protein	64	0	0	0	0	0	0	16.066	0	0	0	0	0
AT3G49800.1	BSD domain-containing protein	48	0	0	0	0	0	0	0	0	0	5.9242	12.633	17.937
AT5G37600.1	ATGSR1, GLN1;1, GSR 1, ATGLN1;1 - glutamine synthase clone R1	39	0	0	0	0	0	0	59.829	0	17.878	0	0	0
AT5G38640.1	NagB/RpiA/CoA transferase-like superfamily protein	69	0	0	0	0	0	0	0	0	0	10.106	0	0
AT4G04040.1	MEE51 - Phosphofructokinase family protein	63	0	2.59	0	0	0	0	10.034	0	0	0	0	0
AT2G44160.1	MTHFR2 - methylenetetrahydrofolate reductase 2	67	0	0	0	0	0	0	46.982	0	0	0	0	0
AT5G13420.1	Aldolase-type TIM barrel family protein	48	0	0	0	0	0	0	27.435	0	0	0	0	0
AT1G75990.1	PAM domain (PCI/PINT associated module) protein	56	0	0	0	0	0	0	0	0	0	0	0	76.472
AT5G16820.1 (+1)	HSF3, HSFA1B, ATHSFA1B, ATHSF3 - heat shock factor 3	54	0	0	0	0	0	0	11.209	0	0	0	0	0
AT3G01310.1 (+1)	Phosphoglycerate mutase-like family protein	120	0	0	0	0	0	0	8.2273	0	0	0	0	23.144
AT1G07990.1	SIT4 phosphatase-associated family protein	90	0	0	0	0	0	0	0	0	0	8.0494	21.135	0
AT3G05020.1	ACP1, ACP - acyl carrier protein 1	15	0	0	0	0	0	0	0	0	9.6271	0	0	0
AT4G34120.1	LEJ1, CDCP1 - Cystathionine beta-synthase (CBS) family protein	26	0	0	0	1.6647	0	9.0081	0	0	0	0	0	0
AT5G42790.1	PAF1, ATPSM30, ARS5 - proteasome alpha subunit F1	30	0	0	0	6.8159	0	0	16.694	0	0	0	0	0
AT2G42910.1	Phosphoribosyltransferase family protein	38	0	0	0	0	0	0	16.813	0	0	0	0	0
AT5G48960.1	HAD-superfamily hydrolase, subfamily IG, 5'-nucleotidase	73	0	0	0	7.6294	0	0	5.4849	0	0	0	0	0
AT3G19820.1 (+2)	DWF1, DIM, EVE1, DIM1, CBB1 - cell elongation protein / DWARF1 / DIMINUTO (DIM)	65	0	0	0	0	0	0	0	0	0	16.073	0	27.057
AT3G17880.1	HIP, ATTDX, ATHIP2, TDX - tetraticopeptide domain-containing thioredoxin	43	0	0	0	0	0	0	2.9064	0	0	11.995	8.9128	7.2347
AT2G25430.1	epsin N-terminal homology (ENTH) domain-containing protein / clathrin assembly protein-related	72	0	0	0	18.984	2.2288	7.2232	0	0	0	0	0	0
AT3G01290.1	SPFH/Band 7/PHB domain-containing membrane-associated protein family	31	0	0	0	0	16.555	0	0	0	0	0	0	0
AT1G50320.1	ATHX, ATX, THX - thioredoxin X	20	0	0	14.864	0	0	0	0	0	0	0	0	0
AT2G45140.1	PVA12 - plant VAP homolog 12	26	0	0	0	0	0	0	0	0	6.1747	12.036	19.335	0
AT1G76450.1	Photosystem II reaction center PsbP family protein	27	0	0	0	7.0249	0	0	0	8.7906	0	0	0	0
AT4G11175.1	Nucleic acid-binding, OB-fold-like protein	16	0	0	14.864	0	0	0	0	0	0	0	0	0
AT3G02770.1	Ribonuclease E inhibitor RraA/Dimethylmenaquinone methyltransferase	18	7.1684	7.0622	18.613	0	0	0	0	0	0	0	0	0
AT3G50670.1	U1-70K, U1SNRNP - U1 small nuclear ribonucleoprotein-70K	50	0	0	0	0	0	0	0	0	0	8.0494	25.195	32.248
AT1G78300.1	GRF2, 14-3-3OMEGA, GF14 OMEGA - general regulatory factor 2	29	0	0	0	0	0	0	55.223	0	0	0	0	32.039
AT5G13260.1	unknown protein	60	0	0	0	0	0	0	0	0	0	20.098	0	32.248
AT1G50570.1 (+1)	Calcium-dependent lipid-binding (CaLB domain) family protein	42	0	0	0	0	0	14.446	5.7241	0	9.6271	0	0	0
AT2G26540.1	HEMD, UROS, ATUROS, ATDUF3, DUF3 - uroporphyrinogen-III synthase family protein	34	0	0	0	0	0	0	0	8.7906	0	0	0	0
AT1G02150.1	Tetratricopeptide repeat (TPR)-like superfamily protein	60	0	0	0	0	1.9941	18.084	0	0	0	0	0	0
AT4G29480.1	Mitochondrial ATP synthase subunit G protein	14	0	0	0	0	0	0	0	0	0	6.231	3.3646	18.164
AT4G23040.1	Ubiquitin-like superfamily protein	58	0	0	0	0	0	0	0	0	0	25.995	5.0918	6.0182
AT1G30630.1	Coatomer epsilon subunit	33	0	0	0	5.3537	0	0	0	0	0	4.1856	0	0
AT4G28470.1	RPN1B, ATRPN1B - 26S proteasome regulatory subunit S2 1B	98	0	0	0	5.8265	0	0	0	0	0	0	0	0
AT1G30360.1	ERD4 - Early-responsive to dehydration stress protein (ERD4)	82	0	0	0	0	0	0	0	0	0	8.0241	0	0
AT2G35010.1 (+1)	ATO1, TO1 - thioredoxin O1	21	0	0	0	0	0	0	0	0	22.871	0	0	0
AT1G77490.1	TAPX - thylakoidal ascorbate peroxidase	46	16.04	0	10.102	0	0	0	0	0	0	0	0	0
AT3G21360.1	2-oxoglutarate (2OG) and Fe(II)-dependent oxygenase superfamily protein	37	18.38	0	10.079	0	0	0	0	0	0	0	0	0
AT2G35810.1	unknown protein	22	0	14.124	14.735	0	0	0	0	0	0	0	0	0
AT3G15040.1	unknown protein	26	0	0	0	0	0	0	1.3351	0	19.673	0	0	0
AT4G33090.1	APM1, ATAPM1 - aminopeptidase M1	98	0	0	0	0	0	0	20.782	0	0	0	0	0
AT5G14030.1 (+3)	translocon-associated protein beta (TRAPB) family protein	21	0	0	0	1.7854	1.9941	0	0	0	0	0	0	0
AT4G39460.1 (+1)	SAMC1, SAMT1 - S-adenosylmethionine carrier 1	35	0	0	0	7.0249	0	7.2232	0	0	0	0	0	0
AT3G05625.1	Tetratricopeptide repeat (TPR)-like superfamily protein	29	0	0	0	0	0	0	0	0	0	0	8.4907	28.252
AT5G28740.1	Tetratricopeptide repeat (TPR)-like superfamily protein	107	0	0	0	0	0	0	0	0	0	8.0241	8.5044	22.431
AT1G14000.1	VIK - VH1-interacting kinase	49	0	0	0	17.353	0	0	0	0	0	0	0	3.5833
AT5G09850.1	Transcription elongation factor (TFIIS) family protein	40	0	0	0	0	0	0	0	0	0	5.9103	25.195	16.392
AT2G45470.1	FLA8, AGP8 - FASCICLIN-like arabinogalactan protein 8	43	0	0	0	0	20.578	7.2488	0	0	0	0	0	0
AT4G37800.1	XTH7 - xyloglucan endotransglucosylase/hydrolase 7	34	0	0	0	2.7367	2.0848	0	0	0	0	1.9844	0	0
AT3G03380.1	DegP7 - DegP protease 7	120	0	0	0	0	0	0	0	0	0	0	2.5504	6.0397
AT5G10240.1 (+1)	ASN3 - asparagine synthetase 3	65	0	0	0	0	0	0	0	0	0	84.392	43.969	0
AT3G06510.2 (+1)	SFR2 - Glycosyl hydrolase superfamily protein	75	0	0	0	0	0	0	0	0	0	20.944	0	2.3901
AT1G07480.1 (+1)	Transcription factor IIA, alpha/beta subunit	41	0	0	0	1.8061	0	0	0	0	0	0	5.0827	9.6678
AT5G04740.1	ACT domain-containing protein	33	0	0	0	0	0	0	20.288	0	0	0	0	0
AT5G04360.1	ATPU1, ATLDA, PU1, LDA - limit dextrinase	107	0	0	0	0	0	0	23.633	8.7906	0	0	0	0
AT1G48600.1 (+1)	PMEAMT, AtPMEAMT - S-adenosyl-L-methionine-dependent methyltransferases superfamily protein	54	0	0	0	0	0	0	27.903	0	0	0	0	0
AT1G22300.3 (+2)	GRF10, GF14 EPSILON - general regulatory factor 10	29	0	0	0	0	0	0	35.036	0	0	0	0	0
AT3G18390.1	EMB1865 - CRS1 / YhbY (CRM) domain-containing protein	96	0	0	0	0	0	0	0	0	0	0	14.264	32.353
AT1G03870.1	FLA9 - FASCICLIN-like arabinoogalactan 9	26	0	0	0	0	0	10.835	0	0	0	0	0	0
AT4G34430.1 (+3)	CHB3, ATSWI3D - DNA-binding family protein	108	0	0	0	0	0	8.1193	0	0	0	8.0494	0	0
AT2G38280.1 (+1)	FAC1, ATAMPD - AMP deaminase, putative / myoadenylate deaminase, putative	95	0	0	0	0	0	0	0	0	0	0	0	13.025
AT5G42950.1	GYF domain-containing protein	188	0	0	0	7.9372	0	11.685	0	0	0	0	0	0
AT5G63980.1	SAL1, ALX8, ATSAL1, HOS2, FRY1, RON1 - Inositol monophosphatase family protein	44	0	0	0	0	0	0	13.951	0	0	0	0	0
AT5G23860.1 (+1)	TUB8 - tubulin beta 8	51	0	0	0	12.972	0	0	0	0	0	195.04	0	0
ATCG00840.1 (+1)	RPL23.1, RPL23 - ribosomal protein L23.1	11	0	0	0	6.7323	2.9915	0	0	0	0	0	0	0
AT1G01160.1 (+1)	GIF2 - GRF1-interacting factor 2	21	0	0	0	13.841	0	14.472	0	0	0	0	0	0
AT5G66120.2	3-dehydroquinate synthase, putative	48	0	7.0449	0	0	0	0	0	0	0	0	0	0
AT3G18820.1	ATRABG3F, ATRAB7B, RAB71, RABG3F, RAB7B - RAB GTPase homolog G3F	23	0	0	0	7.0249	8.5092	7.2488	0	0	0	0	0	0
AT2G34590.1	Transketolase family protein	44	0	0	0	37.488	0	0	0	0	0	0	0	0
AT2G43100.1	IPMI2, ATLEUD1 - isopropylmalate isomerase 2	27	14.337	0	32.224	0	0	0	0	0	14.441	0	0	0
AT1G04710.1	KAT1, PKT4 - peroxisomal 3-ketoacyl-CoA thiolase 4	47	0	0	22.49	0	0	0	0	18.561	0	0	0	0
AT1G75270.1	DHAR2 - dehydroascorbate reductase 2	23	0	7.0449	0	0	0	0	0	0	0	0	0	0
AT4G39960.1	Molecular chaperone Hsp40/DnaJ family protein	48	0	0	0	17.249	8.046	0	0	0	0	0	0	0
AT3G15000.1	cobalt ion binding	43	0	0	0	7.0249	8.046	10.873	0	0	0	0	0	0
AT1G16210.1	unknown protein	27	5.2657	0	14.727	0	0	0	0	0	0	0	0	0
AT1G73530.1	RNA-binding (RRM/RBD/RNP motifs) family protein	20	7.627	10.567	7.4967	0	0	0	0	0	0	0	0	0
AT4G29220.1	PFK1 - phosphofructokinase 1	52	0	0	0	19.06	0	0	2.7664	0	0	0	0	0
AT5G19050.1	alpha/beta-Hydrolases superfamily protein	38	0	0	0	0	0	0	0	0	0	9.06	0	0
AT5G07020.1	proline-rich family protein	24	0	0	0	0	20.81	7.2488	0	0	0	0	0	0
AT2G40730.1	Protein kinase family protein with ARM repeat domain	86	0	0	0	0	0	0	0	0	0	14.818	0	19.223
AT5G11450.1	Mog1/PsbP/DUF1795-like photosystem II reaction center PsbP family protein	33	0	0	22.296	0	0	0	0	0	0	0	0	0
AT2G43970.1 (+1)	RNA-binding protein	61	0	0	0	4.2025	8.2744	0	0	0	0	0	0	0
AT4G38460.1	GGR - geranylgeranyl reductase	35	0	10.567	0	0	0	0	0	0	0	0	0	0
AT1G80230.1	Rubredoxin-like superfamily protein	19	0	0	0	0	0	18.913	0	0	0	0	0	0
AT5G19900.1	PRLI-interacting factor, putative	56	0	0	0	0	0	0	0	0	0	16.073	25.195	2.3901
AT1G13960.1 (+1)	WRKY4 - WRKY DNA-binding protein 4	56	0	0	0	0	0	0	0	0	0	0	14.337	0
AT4G37830.1	cytochrome c oxidase-related	11	0	0	0	5.9447	9.5063	1.7199	0	0	0	0	0	0
AT2G34470.1 (+1)	UREG, PSKF109 - urease accessory protein G	30	0	0	0	0	0	10.873	0	0	0	0	0	0
AT1G02920.1	ATGSTF7, GST11, ATGSTF8, GSTF7, ATGST11 - glutathione S-transferase 7	24	0	0	0	0	0	0	0	47.114	0	0	0	0
AT1G69800.1	Cystathionine beta-synthase (CBS) protein	48	0	0	0	13.841	0	7.2488	0	0	0	0	3.3646	0
AT4G12770.2 (+3)	Chaperone DnaJ-domain superfamily protein	98	0	0	0	0	2.1896	9.8471	0	0	0	0	0	0
AT1G26880.1 (+1)	Ribosomal protein L34e superfamily protein	14	0	0	0	0	8.046	16.244	0	0	0	0	0	0
AT1G76970.1	Target of Myb protein 1	49	0	0	0	0	0	0	0	0	0	13.96	0	0
AT5G14220.1 (+1)	HEMG2, MEE61, PPO2 - Flavin containing amine oxidoreductase family	56	0	0	0	7.697	5.3169	1.8605	0	0	0	0	0	0
AT5G54500.1	FQR1 - flavodoxin-like quinone reductase 1	22	0	0	0	0	1.9941	0	0	0	0	0	0	0
AT4G26900.1	AT-HF, HISN4 - HIS HF	64	11.639	14.107	0	0	0	0	0	0	0	0	0	0
AT5G51120.1	PABN1, ATPABN1 - polyadenylate-binding protein 1	26	0	0	0	0	0	0	0	0	0	16.073	23.172	0
AT1G08370.1	DCP1, ATDCP1 - decapping 1	41	0	0	0	0	0	25.332	0	0	0	0	0	0
AT5G56950.1	NFA03, NFA3, NAP1;3 - nucleosome assembly protein 1;3	43	0	0	0	0	0	0	0	0	0	0	55.406	0
AT1G60550.1	ECHID, DHNS - enoyl-CoA hydratase/isomerase D	37	1.7429	0	0	0	0	0	0	0	0	0	0	0
AT1G66410.1 (+1)	CAM4, ACAM-4 - calmodulin 4	17	0	0	0	0	0	0	105.98	6.8243	0	0	0	0
AT5G58590.1	RANBP1 - RAN binding protein 1	25	0	0	0	0	0	0	34.317	0	48.135	0	0	0
AT4G37000.1	ACD2, ATRCCR - accelerated cell death 2 (ACD2)	36	0	0	0	0	0	0	18.108	0	0	0	0	0
AT4G33760.1	tRNA synthetase class II (D, K and N) family protein	75	0	0	0	0	0	0	25.86	0	0	0	0	0
AT3G27820.1	ATMDAR4, MDAR4 - monodehydroascorbate reductase 4	54	0	0	0	0	0	0	0	0	0	16.073	0	0
AT3G54360.1	zinc ion binding	45	0	0	0	0	0	0	0	0	0	0	3.262	13.025
AT3G05090.1 (+1)	LRS1 - Transducin/WD40 repeat-like superfamily protein	82	0	0	0	7.0249	16.555	0	0	0	0	0	0	0
AT2G22475.1 (+1)	GEM - GRAM domain family protein	32	0	0	0	13.841	3.9604	1.8867	0	0	0	0	0	0
AT3G55250.1	unknown protein	31	0	0	0	6.8159	0	0	0	0	0	0	0	8.4083
AT1G21065.1	unknown protein	24	4.1924	4.3679	3.5003	0	0	0	0	0	0	0	0	0
AT4G04770.1	ATABC1, LAF6, ATNAP1, ABC1 - ATP binding cassette protein 1	62	0	0	0	0	0	0	5.4849	22.836	0	0	0	0
AT1G58080.1	ATATP-PRT1, HISN1A, ATP-PRT1 - ATP phosphoribosyl transferase 1	45	0	0	0	0	0	0	8.2273	0	0	0	0	0
AT1G50900.1	GDC1 - Ankyrin repeat family protein	19	0	0	0	0	0	0	8.2273	0	0	0	0	0
AT2G40300.1	ATFER4, FER4 - ferritin 4	29	0	0	0	1.7854	8.046	0	0	0	0	0	0	0
AT4G16760.1 (+1)	ACX1, ATACX1 - acyl-CoA oxidase 1	74	0	0	0	0	0	0	16.928	0	9.6271	0	0	0
AT1G53280.1	Class I glutamine amidotransferase-like superfamily protein	47	0	0	0	0	0	0	9.2862	0	0	0	0	0
AT5G49030.3 (+1)	OVA2 - tRNA synthetase class I (I, L, M and V) family protein	143	0	0	0	0	0	0	25.804	0	0	0	0	0
AT3G55040.1	GSTL2 - glutathione transferase lambda 2	33	0	0	0	0	0	0	25.86	0	0	0	0	0
AT4G35890.1	winged-helix DNA-binding transcription factor family protein	56	0	0	0	0	0	0	0	0	9.6271	0	0	0
AT1G74690.1	IQD31 - IQ-domain 31	65	0	0	0	0	0	0	0	0	0	0	12.562	0
AT2G38010.1 (+1)	Neutral/alkaline non-lysosomal ceramidase	83	0	0	0	13.841	0	7.2232	0	0	0	0	0	0
AT5G14240.1	Thioredoxin superfamily protein	29	0	0	0	0	0	0	0	0	0	11.147	5.9582	0
AT4G32915.1	unknown protein	18	0	0	0	0	0	0	0	0	9.6271	0	0	0
AT3G53870.1	Ribosomal protein S3 family protein	27	0	0	0	0	25.122	49.399	0	0	0	0	0	0
AT2G43710.1 (+1)	SSI2, FAB2 - Plant stearoyl-acyl-carrier-protein desaturase family protein	46	0	0	0	0	0	0	11.209	0	0	0	0	0
AT1G50940.1	ETFALPHA - electron transfer flavoprotein alpha	38	0	7.0449	14.864	0	0	0	0	0	0	0	0	0
AT2G44620.1	MTACP-1, MTACP1 - mitochondrial acyl carrier protein 1	14	0	0	0	0	0	0	0	0	0	0	0	32.248
AT2G35500.1	SKL2 - shikimate kinase like 2	43	0	0	0	7.0249	0	0	0	0	0	0	0	0
AT5G67030.1	ABA1, LOS6, NPQ2, ATABA1, ZEP, IBS3, ATZEP - zeaxanthin epoxidase (ZEP) (ABA1)	74	0	0	0	0	0	0	0	0	0	0	0	19.043
AT2G39390.1	Ribosomal L29 family protein	14	0	0	0	0	0	18.122	0	0	0	0	0	0
AT3G56430.1	unknown protein	49	0	0	0	0	0	0	0	0	19.163	0	0	13.025
AT1G10840.1 (+1)	TIF3H1 - translation initiation factor 3 subunit H1	38	0	0	0	0	0	18.084	0	0	0	0	0	0
AT5G23060.1	CaS - calcium sensing receptor	41	0	0	0	0	8.5092	7.2232	0	0	0	0	0	0
AT1G32500.1	ATNAP6, NAP6 - non-intrinsic ABC protein 6	53	0	0	0	0	0	0	12.64	4.1772	0	0	0	0
AT1G60940.1 (+1)	SNRK2-10, SNRK2.10, SRK2B - SNF1-related protein kinase 2.10	41	0	0	0	0	0	0	0	0	0	0	0	38.761
AT1G66680.1	AR401 - S-adenosyl-L-methionine-dependent methyltransferases superfamily protein	39	0	0	0	0	0	0	5.7241	0	0	0	0	0
AT4G05530.1	IBR1, SDRA - indole-3-butyric acid response 1	27	11.44	0	7.3676	0	0	0	0	0	0	0	0	0
AT5G02740.1	Ribosomal protein S24e family protein	25	0	0	0	0	2.1896	16.29	0	0	0	0	0	0
AT4G24800.1 (+2)	MA3 domain-containing protein	77	0	0	0	0	0	0	7.8383	0	0	0	0	0
AT2G42680.1	MBF1A, ATMBF1A - multiprotein bridging factor 1A	16	0	0	22.49	0	0	0	0	0	0	0	0	0
AT5G22640.1	emb1211 - MORN (Membrane Occupation and Recognition Nexus) repeat-containing protein	100	0	0	0	0	0	0	0	0	0	0	5.0918	20.153
AT3G16270.1	ENTH/VHS family protein	75	0	0	0	1.6269	8.046	14.472	0	0	0	0	0	0
AT3G47810.1 (+2)	MAG1, VPS29, ATVPS29 - Calcineurin-like metallo-phosphoesterase superfamily protein	21	0	0	0	1.7621	8.5092	5.3653	0	0	0	0	0	0
AT5G57490.1	VDAC4, ATVDAC4 - voltage dependent anion channel 4	30	0	0	0	0	0	7.2488	0	0	0	0	0	0
AT5G46020.1	CONTAINS InterPro DOMAIN/s: Casein kinase substrate, phosphoprotein PP28 (InterPro:IPR019380); Has 30201 Blast hits to 17322 proteins in 780 species: Archae - 12; Bacteria - 1396; Metazoa - 17338; Fungi - 3422; Plants - 5037; Viruses - 0; Other Eukaryotes	19	0	0	0	0	0	0	0	0	0	0	2.5504	6.0397
AT5G17530.1 (+2)	phosphoglucosamine mutase family protein	63	0	0	0	0	0	0	13.244	0	0	0	0	0
AT1G29530.1	unknown protein	25	0	0	0	0	0	0	0	0	0	0	14.056	0
AT2G22450.1	riboflavin biosynthesis protein, putative	52	0	0	0	27.682	0	0	0	0	0	0	0	0
AT1G02130.1	ATRAB1B, ARA5, ARA-5, ATRABD2A, RABD2A, RA-5 - RAS 5	23	0	0	0	7.0249	0	0	0	0	0	0	0	0
AT5G55210.1	unknown protein	19	0	0	0	0	0	0	5.7241	0	15.538	0	0	0
AT4G01690.2 (+1)	PPOX - Flavin containing amine oxidoreductase family	54	0	0	0	7.6294	0	6.2578	0	0	0	0	0	0
AT1G49240.1	ACT8 - actin 8	42	0	0	0	0	0	0	0	0	0	52.833	0	0
AT1G29250.1	Alba DNA/RNA-binding protein	15	0	0	0	12.242	0	6.2335	0	0	0	0	0	0
AT5G18800.1 (+1)	Cox19-like CHCH family protein	12	0	0	0	4.4713	0	3.695	0	0	0	0	0	0
AT1G20110.1	RING/FYVE/PHD zinc finger superfamily protein	65	0	0	0	0	8.046	7.2232	0	0	0	0	0	0
AT2G46540.1	unknown protein	7	0	0	0	7.8897	9.6235	7.2488	0	0	0	0	0	0
AT5G47010.1	UPF1, LBA1, ATUPF1 - RNA helicase, putative	137	0	0	0	0	0	0	0	0	0	8.0241	0	0
AT1G69295.1	PDCB4 - plasmodesmata callose-binding protein 4	22	0	0	7.3676	0	0	0	0	0	9.6271	0	0	0
AT3G58990.1	IPMI1 - isopropylmalate isomerase 1	27	20.055	21.135	0	0	0	0	0	0	0	0	0	0
AT2G42210.1 (+3)	ATOEP16-3, OEP16-3 - Mitochondrial import inner membrane translocase subunit Tim17/Tim22/Tim23 family protein	17	0	0	0	0	0	11.69	0	0	0	0	0	0
AT1G31800.1	CYP97A3, LUT5 - cytochrome P450, family 97, subfamily A, polypeptide 3	67	0	0	0	0	0	0	0	0	0	18.201	0	0
AT2G41220.1	GLU2 - glutamate synthase 2	178	0	0	0	0	0	0	33.163	15.403	0	0	0	0
AT2G30870.1	ATGSTF10, ERD13, ATGSTF4, GSTF10 - glutathione S-transferase PHI 10	24	0	0	0	0	0	0	21.091	0	0	0	0	0
AT5G44500.1 (+5)	Small nuclear ribonucleoprotein family protein	27	0	0	0	2.4622	0	0	0	0	0	0	0	0
AT4G34730.1	ribosome-binding factor A family protein	24	0	0	0	0	0	0	2.0165	0	5.5119	0	2.5414	0
AT5G35530.1	Ribosomal protein S3 family protein	27	0	0	0	21.329	30.779	0	0	0	0	0	0	0
AT1G05010.1	EFE, ACO4, EAT1 - ethylene-forming enzyme	37	0	7.0622	0	0	0	0	8.2273	0	0	0	0	0
AT3G60810.2 (+1)	unknown protein	24	0	0	0	6.8159	0	7.2488	0	0	0	0	0	0
AT1G61690.1	phosphoinositide binding	129	0	0	0	0	0	0	0	0	0	0	2.5414	9.6463
AT2G33380.1 (+1)	RD20, CLO-3 - Caleosin-related family protein	27	0	0	0	4.4493	0	0	0	0	0	6.231	5.0469	2.3901
AT3G04120.1	GAPC, GAPC-1, GAPC1 - glyceraldehyde-3-phosphate dehydrogenase C subunit 1	37	0	0	0	0	0	0	0	270.81	0	0	0	0
AT1G24560.1	unknown protein	77	0	0	0	0	0	0	0	0	0	0	18.844	0
AT5G28020.1 (+4)	CYSD2, ATCYSD2 - cysteine synthase D2	34	0	12.271	17.371	0	0	0	0	0	0	0	0	0
AT3G22190.1 (+1)	IQD5 - IQ-domain 5	47	0	0	0	0	0	0	0	0	0	3.954	0	12.816
AT4G21150.1 (+2)	HAP6 - ribophorin II (RPN2) family protein	75	0	0	0	0	0	0	0	0	0	8.0494	0	12.816
AT5G14720.1	Protein kinase superfamily protein	75	0	0	0	0	0	0	0	0	0	0	12.633	13.025
AT3G10350.1 (+1)	P-loop containing nucleoside triphosphate hydrolases superfamily protein	45	0	0	0	13.841	0	0	0	0	0	0	0	0
AT4G23760.1	Cox19-like CHCH family protein	13	0	0	0	6.8159	0	0	0	0	0	0	0	0
AT1G14410.1	ATWHY1, PTAC1, WHY1 - ssDNA-binding transcriptional regulator	29	0	0	0	6.8159	0	0	0	0	0	0	0	13.025
AT3G58010.1	PGL34 - plastoglobulin 34kD	34	0	0	0	3.3565	0	8.1404	0	0	0	0	0	0
AT3G18490.1	Eukaryotic aspartyl protease family protein	53	0	0	0	17.249	0	7.2488	0	0	0	0	0	0
AT1G05385.1	LPA19, Psb27-H1 - photosystem II 11 kDa protein-related	22	0	0	18.548	0	0	0	0	0	0	0	0	0
AT1G19920.1	APS2, ASA1 - Pseudouridine synthase/archaeosine transglycosylase-like family protein	54	0	0	0	0	0	0	7.6869	0	0	0	0	0
AT1G59610.1	ADL3, CF1, DRP2B, DL3 - dynamin-like 3	100	0	0	0	14.643	0	0	0	0	0	0	0	0
AT1G51710.1 (+1)	UBP6, ATUBP6 - ubiquitin-specific protease 6	54	0	0	0	0	0	0	5.4849	26.219	0	0	0	0
AT1G71730.1	unknown protein	20	0	0	0	0	0	0	1.3443	0	14.025	0	0	0
AT3G06350.1	EMB3004, MEE32 - dehydroquinate dehydratase, putative / shikimate dehydrogenase, putative	66	0	0	0	0	0	0	19.675	0	0	0	0	0
AT3G10740.1	ASD1, ARAF1, ARAF, ATASD1 - alpha-L-arabinofuranosidase 1	75	0	0	0	0	0	0	19.795	0	0	0	0	0
AT1G62390.1	Phox2 - Octicosapeptide/Phox/Bem1p (PB1) domain-containing protein / tetratricopeptide repeat (TPR)-containing protein	83	0	0	0	0	0	0	11.209	8.7906	0	0	0	0
AT1G75750.1 (+1)	GASA1 - GAST1 protein homolog 1	11	0	6.9903	0	0	0	0	0	0	0	0	0	0
AT2G36130.1	Cyclophilin-like peptidyl-prolyl cis-trans isomerase family protein	18	0	0	7.4967	0	0	0	0	0	0	0	0	0
AT1G29370.1	Kinase-related protein of unknown function (DUF1296)	91	0	0	0	0	0	0	0	0	0	65.331	21.678	19.465
AT1G78680.1 (+1)	ATGGH2, GGH2 - gamma-glutamyl hydrolase 2	39	0	0	0	0	0	0	13.562	0	0	0	0	0
AT3G05970.1	LACS6, ATLACS6 - long-chain acyl-CoA synthetase 6	77	0	0	0	0	0	14.446	0	0	0	0	0	0
AT5G65430.1 (+2)	GRF8, 14-3-3KAPPA, GF14 KAPPA - general regulatory factor 8	28	0	0	0	0	0	0	46.7	0	0	0	0	0
AT1G79440.1	ALDH5F1, SSADH1, SSADH - aldehyde dehydrogenase 5F1	57	0	0	0	0	0	0	20.387	0	0	0	0	0
AT1G11430.1	plastid developmental protein DAG, putative	26	0	0	0	1.7296	0	1.7923	0	0	0	0	0	0
AT4G23460.1	Adaptin family protein	99	0	0	0	0	0	0	0	0	0	2.0719	0	7.1196
AT1G15820.1	LHCB6, CP24 - light harvesting complex photosystem II subunit 6	28	0	0	0	6.8159	8.046	0	0	0	0	0	0	0
AT4G02480.1	AAA-type ATPase family protein	137	0	0	0	0	0	0	0	0	8.324	0	0	0
AT1G54100.1 (+1)	ALDH7B4 - aldehyde dehydrogenase 7B4	54	0	0	0	0	0	0	6.1328	9.77	0	0	0	0
AT5G36210.1	alpha/beta-Hydrolases superfamily protein	81	0	0	0	0	0	0	8.5862	0	2.5396	0	0	0
AT1G29990.1	PFD6 - prefoldin 6	15	0	3.4	9.4073	0	0	0	0	0	0	0	0	0
AT1G16190.1	RAD23A - Rad23 UV excision repair protein family	40	0	0	0	0	0	0	0	0	0	0	7.4434	3.4143
AT3G12390.1	Nascent polypeptide-associated complex (NAC), alpha subunit family protein	22	0	0	0	0	0	0	0	0	0	0	3.4078	0
AT3G10050.1	OMR1 - L-O-methylthreonine resistant 1	65	0	0	0	0	7.9347	10.873	0	0	0	0	0	0
AT2G27860.1	AXS1 - UDP-D-apiose/UDP-D-xylose synthase 1	44	0	0	0	0	0	0	21.035	0	0	0	0	0
AT2G44100.1 (+1)	ATGDI1, AT-GDI1, GDI1 - guanosine nucleotide diphosphate dissociation inhibitor 1	50	0	0	0	0	0	0	32.196	0	0	0	0	0
AT1G54060.1	ASIL1 - 6B-interacting protein 1-like 1	42	0	0	0	0	0	0	0	0	0	0	0	2.4331
AT3G14010.1 (+3)	CID4 - CTC-interacting domain 4	66	0	0	0	0	0	0	0	0	0	4.1856	3.812	2.4331
AT3G60370.1	FKBP-like peptidyl-prolyl cis-trans isomerase family protein	27	0	0	0	6.8159	0	0	0	0	0	0	2.5414	0
AT2G35530.1	bZIP16, AtbZIP16 - basic region/leucine zipper transcription factor 16	43	0	0	0	0	0	0	0	0	0	0	0	12.816
AT1G10430.1	PP2A-2 - protein phosphatase 2A-2	35	0	0	0	0	0	0	0	0	0	0	0	13.025
AT3G21220.1	ATMKK5, ATMAP2K_ALPHA, MAP2K_A, MKK5, ATMEK5, MEK5 - MAP kinase kinase 5	38	0	0	0	13.841	0	0	0	0	0	0	0	0
AT3G60190.1	ADL4, ADLP2, EDR3, DRP1E, ADL1E, DL1E - DYNAMIN-like 1E	70	0	0	0	1.8061	2.1896	1.8605	0	0	0	0	0	0
AT5G42080.1 (+2)	ADL1, ADL1A, AG68, DRP1A, RSW9, DL1 - dynamin-like protein	68	0	0	0	3.5683	5.0029	1.8605	0	0	0	0	0	0
AT5G08450.1 (+2)	CONTAINS InterPro DOMAIN/s: Histone deacetylation protein Rxt3 (InterPro:IPR013951); Has 34444 Blast hits to 20801 proteins in 1175 species: Archae - 64; Bacteria - 2390; Metazoa - 15568; Fungi - 3729; Plants - 1886; Viruses - 208; Other Eukaryotes - 1059	104	0	0	0	12.164	0	0	0	0	0	0	0	0
AT3G25150.2 (+1)	Nuclear transport factor 2 (NTF2) family protein with RNA binding (RRM-RBD-RNP motifs) domain	64	0	0	0	0	0	0	0	0	0	8.0241	0	0
AT2G16950.1 (+1)	TRN1, ATTRN1 - transportin 1	100	0	0	0	21.522	0	0	0	0	0	0	0	0
AT3G56460.1	GroES-like zinc-binding alcohol dehydrogenase family protein	37	0	0	0	0	0	0	17.514	0	0	0	0	0
AT1G10510.1	emb2004 - RNI-like superfamily protein	65	0	0	0	0	0	0	0	0	0	2.8079	0	4.8232
AT1G02280.1 (+1)	TOC33, ATTOC33, PPI1 - translocon at the outer envelope membrane of chloroplasts 33	33	0	0	0	6.8159	0	0	0	0	0	0	0	0
AT1G24050.1	RNA-processing, Lsm domain	20	0	0	0	6.8159	0	0	0	0	0	0	0	0
AT4G38510.1 (+4)	ATPase, V1 complex, subunit B protein	54	0	0	0	116.55	0	0	0	0	0	0	0	0
AT3G13060.1 (+1)	ECT5 - evolutionarily conserved C-terminal region 5	61	0	0	0	0	0	7.2232	0	0	0	0	0	0
AT4G32551.2 (+1)	LUG - LisH dimerisation motif;WD40/YVTN repeat-like-containing domain	107	0	0	0	7.0249	0	7.2232	0	0	0	0	0	0
AT5G20935.1	unknown protein	12	0	0	0	0	0	0	0	0	19.163	0	0	0
AT5G20920.2 (+2)	EIF2 BETA - eukaryotic translation initiation factor 2 beta subunit	31	0	0	0	0	0	0	5.4849	0	0	0	0	0
AT3G47590.1	alpha/beta-Hydrolases superfamily protein	35	0	7.0449	7.4967	0	0	0	0	0	0	0	0	0
AT3G12480.1	NF-YC11 - nuclear factor Y, subunit C11	32	0	0	0	0	0	0	11.909	0	9.6271	0	0	0
AT1G20160.1 (+1)	ATSBT5.2 - Subtilisin-like serine endopeptidase family protein	81	0	0	0	0	0	0	0	0	23.977	0	0	0
AT5G14590.1	Isocitrate/isopropylmalate dehydrogenase family protein	54	7.1684	0	0	0	0	0	8.2273	0	0	0	0	0
AT1G59870.1	PEN3, PDR8, ATPDR8, ABCG36, ATABCG36 - ABC-2 and Plant PDR ABC-type transporter family protein	165	0	0	0	10.224	0	0	0	0	0	0	0	2.4331
AT1G21600.1 (+1)	PTAC6 - plastid transcriptionally active 6	37	0	0	0	0	0	0	0	0	0	15.022	0	2.3901
AT2G41530.1	ATSFGH, SFGH - S-formylglutathione hydrolase	32	0	0	0	0	0	0	16.813	0	0	0	0	0
AT3G05910.1 (+1)	Pectinacetylesterase family protein	46	0	0	7.3676	0	0	0	0	0	0	0	0	0
AT3G09890.1	Ankyrin repeat family protein	22	0	0	0	0	0	0	19.675	0	0	0	0	0
AT2G42490.1	Copper amine oxidase family protein	87	0	0	0	0	0	0	0	0	0	8.0494	2.5504	2.3901
AT2G14260.2	PIP - proline iminopeptidase	37	0	0	0	0	0	0	8.8481	0	0	0	0	0
AT5G52580.1 (+1)	RabGAP/TBC domain-containing protein	78	0	0	0	0	0	0	0	0	0	12.048	0	0
AT2G22250.1	ATAAT, AAT, MEE17 - aspartate aminotransferase	46	0	0	0	0	0	0	11.209	0	0	0	0	0
AT2G32920.1	ATPDIL2-3, PDI9, ATPDI9, PDIL2-3 - PDI-like 2-3	48	0	0	0	0	0	0	0	0	0	0	0	28.829
AT3G16140.1	PSAH-1 - photosystem I subunit H-1	15	0	0	0	0	0	7.2488	0	0	0	0	0	0
AT3G58110.1 (+1)	unknown protein	90	0	0	0	0	0	0	0	0	0	0	7.6376	9.6678
AT2G20610.2 (+1)	SUR1, HLS3, RTY, ALF1, RTY1 - Tyrosine transaminase family protein	48	0	0	0	0	0	0	10.009	0	0	0	0	0
AT5G63620.1 (+1)	GroES-like zinc-binding alcohol dehydrogenase family protein	45	0	0	19.6	0	0	0	0	0	0	0	0	0
AT1G02170.1	LOL3, ATMCPB1, MCP1B, ATMC1, MC1 - metacaspase 1	40	0	0	0	0	0	10.797	0	0	0	0	0	0
AT1G66970.1 (+1)	SVL2 - SHV3-like 2	84	0	0	0	0	0	12.745	0	0	0	0	0	0
AT1G23900.1 (+1)	GAMMA-ADAPTIN 1, Gamma-ADR - gamma-adaptin 1	96	0	0	0	0	0	0	0	0	0	8.0494	0	0
AT3G48860.2 (+1)	unknown protein	64	0	0	0	0	0	0	0	0	9.5362	0	0	0
AT3G51750.1 (+1)	unknown protein	12	0	0	0	0	0	0	0	0	9.6271	0	0	0
AT3G04870.1 (+1)	ZDS, PDE181, SPC1 - zeta-carotene desaturase	62	0	0	0	1.7296	0	0	0	0	0	0	0	0
AT4G34030.1	MCCB - 3-methylcrotonyl-CoA carboxylase	64	2.8379	0	0	0	0	0	0	0	0	0	0	0
AT1G62640.1 (+1)	KAS III - 3-ketoacyl-acyl carrier protein synthase III	43	0	0	0	0	0	0	5.7241	2.3114	0	0	0	0
AT5G18170.1	GDH1 - glutamate dehydrogenase 1	45	0	0	1.9149	0	0	0	0	4.5118	0	0	0	0
AT3G13200.1	EMB2769 - Cwf15 / Cwc15 cell cycle control family protein	27	0	0	0	0	0	0	0	0	0	0	28.047	0
AT5G59290.1	UXS3, ATUXS3 - UDP-glucuronic acid decarboxylase 3	39	0	5.3854	0	0	0	0	0	4.5288	0	0	0	0
AT4G31180.1 (+1)	Class II aminoacyl-tRNA and biotin synthetases superfamily protein	63	0	0	0	0	0	0	16.933	0	0	0	0	0
AT5G58440.1	SNX2a - sorting nexin 2A	66	0	0	0	0	0	7.2232	0	0	0	0	0	0
AT2G29550.1	TUB7 - tubulin beta-7 chain	51	0	0	0	0	0	0	0	0	0	93.878	0	0
AT3G08780.2 (+1)	unknown protein	34	0	0	0	7.0249	0	0	0	0	0	0	0	0
AT1G08780.1	AIP3, PFD4 - ABI3-interacting protein 3	15	0	0	0	0	0	0	0	0	9.6271	0	0	0
AT5G50370.1	Adenylate kinase family protein	27	0	0	0	10.537	0	10.835	0	0	0	0	0	0
AT1G48520.1	GATB - GLU-ADT subunit B	61	0	0	0	0	0	0	7.5525	0	0	0	0	0
AT5G38840.1	SMAD/FHA domain-containing protein	82	0	0	0	0	0	0	5.7241	0	0	0	4.893	0
AT3G42050.1	vacuolar ATP synthase subunit H family protein	50	0	0	0	0	0	0	1.4839	0	0	0	0	0
AT2G39050.1	hydroxyproline-rich glycoprotein family protein	36	0	0	0	0	8.5092	0	0	0	0	0	0	0
AT3G55400.1	OVA1 - methionyl-tRNA synthetase / methionine--tRNA ligase / MetRS (cpMetRS)	69	0	0	0	0	0	0	5.4849	0	0	0	0	0
AT5G12040.1	Nitrilase/cyanide hydratase and apolipoprotein N-acyltransferase family protein	40	0	0	0	0	0	0	5.7241	0	0	0	0	0
AT5G17510.1	unknown protein	43	0	0	0	0	0	0	0	0	0	20.098	0	0
AT4G34230.2 (+1)	CAD5, CAD-5 - cinnamyl alcohol dehydrogenase 5	39	0	0	0	0	0	0	2.1002	0	0	0	0	0
AT3G12110.1	ACT11 - actin-11	42	0	0	0	0	0	0	0	0	0	0	0	29.197
AT5G13370.1	Auxin-responsive GH3 family protein	67	0	0	0	0	0	0	16.933	0	0	0	0	0
AT1G24100.1	UGT74B1 - UDP-glucosyl transferase 74B1	51	0	0	0	0	0	0	16.813	0	0	0	0	0
AT1G80460.1 (+1)	NHO1, GLI1 - Actin-like ATPase superfamily protein	56	0	0	0	0	0	0	16.813	0	0	0	0	0
AT4G26510.1 (+1)	UKL4 - uridine kinase-like 4	53	0	0	0	6.8159	0	1.7923	0	0	0	0	0	0
AT4G38370.1	Phosphoglycerate mutase family protein	25	3.6456	0	1.9746	0	0	0	0	0	0	0	0	0
AT2G34860.1 (+1)	EDA3 - DnaJ/Hsp40 cysteine-rich domain superfamily protein	20	2.4496	0	0	0	0	0	0	0	0	0	0	0
AT3G48690.1	ATCXE12, CXE12 - alpha/beta-Hydrolases superfamily protein	36	0	0	0	0	0	0	14.9	0	0	0	0	0
AT2G21250.1	NAD(P)-linked oxidoreductase superfamily protein	35	0	0	0	0	0	0	6.7478	0	0	0	0	0
AT5G26710.1	Glutamyl/glutaminyl-tRNA synthetase, class Ic	81	0	0	0	0	0	0	6.0803	0	0	0	0	0
AT3G07090.1	PPPDE putative thiol peptidase family protein	29	0	0	0	5.3524	0	6.499	0	0	0	0	0	0
AT1G16890.3 (+4)	UBC36 - ubiquitin-conjugating enzyme 36	18	0	0	7.3676	0	0	0	0	0	0	0	0	0
AT5G66530.1 (+1)	Galactose mutarotase-like superfamily protein	34	0	0	0	0	0	0	15.311	0	0	0	0	0
AT1G17980.1 (+1)	PAPS1 - poly(A) polymerase 1	80	0	0	0	0	0	0	0	0	0	0	0	4.8662
AT1G80130.1	Tetratricopeptide repeat (TPR)-like superfamily protein	34	0	0	0	0	0	0	0	0	8.2891	0	0	0
AT3G57050.1 (+1)	CBL - cystathionine beta-lyase	50	0	0	0	0	0	0	6.4242	0	0	0	0	0
AT2G29690.1	ASA2, ATHANSYNAB - anthranilate synthase 2	70	0	0	0	1.6269	0	0	4.0535	0	0	0	0	0
AT1G11870.1 (+1)	ATSRS, OVA7, SRS - Seryl-tRNA synthetase	57	0	0	0	0	0	0	14.739	0	0	0	0	0
AT2G38670.1	PECT1 - phosphorylethanolamine cytidylyltransferase 1	47	0	0	0	0	0	0	0	0	0	1.8734	0	4.8232
AT5G19855.1	Chaperonin-like RbcX protein	23	0	0	0	6.8159	0	0	0	0	0	0	0	0
AT1G31860.1	AT-IE, HISN2 - histidine biosynthesis bifunctional protein (HISIE)	32	0	0	0	0	0	0	11.209	0	0	0	0	0
AT2G32520.1	alpha/beta-Hydrolases superfamily protein	26	0	0	0	0	0	0	11.209	0	0	0	0	0
AT1G76810.1	eukaryotic translation initiation factor 2 (eIF-2) family protein	142	0	0	0	0	0	0	0	0	0	0	3.3989	0
AT3G57150.1	NAP57, AtNAP57, CBF5, AtCBF5 - homologue of NAP57	63	0	0	0	0	0	0	0	0	0	0	10.918	0
AT2G45990.1 (+1)	unknown protein	30	0	0	0	0	0	0	5.4849	0	0	0	0	0
AT4G11850.1	PLDGAMMA1, MEE54 - phospholipase D gamma 1	96	0	0	0	0	0	0	0	0	0	0	0	14.732
AT4G34700.1	CIB22, AtCIB22 - LYR family of Fe/S cluster biogenesis protein	14	0	0	0	1.7621	0	0	0	0	0	0	0	0
AT4G29260.1	HAD superfamily, subfamily IIIB acid phosphatase	29	0	0	0	0	0	0	0	8.7906	0	0	0	0
AT3G13530.1	MAPKKK7, MAP3KE1 - mitogen-activated protein kinase kinase kinase 7	151	0	0	0	0	0	0	0	0	0	12.074	0	0
AT3G02780.1	IPP2, IPIAT1, IDI2 - isopentenyl pyrophosphate:dimethylallyl pyrophosphate isomerase 2	33	0	0	0	0	0	0	13.951	0	0	0	0	0
AT4G36760.1	ATAPP1, APP1 - aminopeptidase P1	72	0	0	0	0	0	0	14.071	0	0	0	0	0
AT2G44350.1 (+1)	ATCS, CSY4 - Citrate synthase family protein	53	0	0	0	0	0	0	13.992	0	0	0	0	0
AT5G07460.1	PMSR2, ATMSRA2 - peptidemethionine sulfoxide reductase 2	24	0	0	0	0	0	0	0	0	23.977	0	0	0
AT1G72550.1 (+1)	tRNA synthetase beta subunit family protein	68	0	0	0	0	0	0	13.951	0	0	0	0	0
AT3G53180.1	glutamate-ammonia ligases;catalytics;glutamate-ammonia ligases	94	0	0	0	0	0	0	8.2273	0	0	0	0	0
AT3G07880.1	SCN1 - Immunoglobulin E-set superfamily protein	27	0	0	0	0	0	0	5.7917	0	0	0	0	0
AT5G19550.1	ASP2, AAT2 - aspartate aminotransferase 2	44	0	0	0	0	0	0	9.334	0	0	0	0	0
AT2G05070.1 (+2)	LHCB2.2, LHCB2 - photosystem II light harvesting complex gene 2.2	29	0	0	0	0	0	0	0	0	0	22.108	0	0
AT5G16715.1	EMB2247 - ATP binding;valine-tRNA ligases;aminoacyl-tRNA ligases;nucleotide binding;ATP binding;aminoacyl-tRNA ligases	111	0	0	0	0	0	0	4.2284	0	0	0	0	0
AT3G02720.1	Class I glutamine amidotransferase-like superfamily protein	42	0	0	0	0	0	0	10.748	0	0	0	0	0
AT5G58240.1 (+1)	FHIT - FRAGILE HISTIDINE TRIAD	20	0	1.7267	0	0	0	0	0	0	0	0	0	0
AT2G17240.1	unknown protein	16	0	0	0	0	0	0	0	0	0	0	10.184	2.4331
AT1G17050.1	SPS2 - solanesyl diphosphate synthase 2	46	0	0	0	0	0	0	8.8948	0	0	0	0	0
AT5G57655.2	xylose isomerase family protein	54	0	0	0	0	0	0	6.4661	0	0	0	0	0
AT3G17810.1	PYD1 - pyrimidine 1	47	0	0	0	0	0	0	1.4001	0	0	0	0	0
AT4G26860.1 (+1)	Predicted pyridoxal phosphate-dependent enzyme, YBL036C type	27	0	0	3.8051	0	0	0	0	0	0	0	0	0
AT1G65270.1 (+2)	unknown protein	33	0	0	0	0	0	7.2232	0	0	0	0	0	0
AT2G28470.1 (+1)	BGAL8 - beta-galactosidase 8	93	0	0	0	0	0	0	0	8.7906	0	0	0	0
AT2G33450.1	Ribosomal L28 family	16	0	0	0	0	0	14.472	0	0	0	0	0	0
AT5G47770.1	FPS1 - farnesyl diphosphate synthase 1	44	0	0	0	0	0	0	11.209	0	0	0	0	0
AT3G02660.1	emb2768 - Tyrosyl-tRNA synthetase, class Ib, bacterial/mitochondrial	57	0	0	0	0	0	0	11.209	0	0	0	0	0
AT1G74880.1	NDH-O - NAD(P)H:plastoquinone dehydrogenase complex subunit O	18	0	0	0	0	0	0	0	0	19.163	0	0	0
AT5G13980.1 (+2)	Glycosyl hydrolase family 38 protein	116	0	0	0	0	0	0	11.209	0	0	0	0	0
AT5G10540.1	Zincin-like metalloproteases family protein	79	0	0	0	0	0	0	52.793	0	0	0	0	0
AT1G73600.2	S-adenosyl-L-methionine-dependent methyltransferases superfamily protein	58	0	0	0	0	0	0	4.329	0	0	0	0	0
AT1G32050.1	SCAMP family protein	30	0	0	0	0	0	1.7923	0	0	0	0	0	0
AT3G16530.1	Legume lectin family protein	31	7.627	0	0	0	0	0	0	0	0	0	0	0
AT1G19350.3 (+4)	BES1, BZR2 - Brassinosteroid signalling positive regulator (BZR1) family protein	39	0	0	0	0	0	0	0	0	0	0	0	3.6496
AT3G20790.1	NAD(P)-binding Rossmann-fold superfamily protein	39	0	0	0	0	0	0	5.4849	0	0	0	0	0
AT3G17210.1	ATHS1, HS1 - heat stable protein 1	12	0	0	0	0	0	0	0	0	14.441	0	0	0
AT2G04880.1 (+1)	ZAP1, ATWRKY1, WRKY1 - zinc-dependent activator protein-1	54	0	0	0	0	0	0	0	0	9.6271	0	0	0
AT4G10320.1	tRNA synthetase class I (I, L, M and V) family protein	135	0	0	0	0	0	0	8.5862	0	0	0	0	0
AT1G07700.3 (+1)	Thioredoxin superfamily protein	25	0	0	0	0	0	0	8.2273	0	0	0	0	0
AT3G02520.1	GRF7, GF14 NU - general regulatory factor 7	30	0	0	0	0	0	0	30.815	0	0	0	0	0
AT4G33670.1	NAD(P)-linked oxidoreductase superfamily protein	35	0	0	0	0	0	0	5.4849	0	0	0	0	0
AT1G66430.1	pfkB-like carbohydrate kinase family protein	41	0	0	0	0	0	0	8.2273	0	0	0	0	0
AT3G54470.1	uridine 5'-monophosphate synthase / UMP synthase (PYRE-F) (UMPS)	52	0	0	0	0	0	0	2.7576	0	0	0	0	0
AT1G76160.1	sks5 - SKU5 similar 5	60	0	0	0	0	0	0	5.7241	0	0	0	0	0
AT4G04350.1	EMB2369 - tRNA synthetase class I (I, L, M and V) family protein	111	0	0	0	0	0	0	3.5315	0	0	0	0	0
AT1G43700.1	VIP1, SUE3 - VIRE2-interacting protein 1	38	0	0	0	0	0	0	0	0	0	0	0	6.0827
AT5G52810.1	NAD(P)-binding Rossmann-fold superfamily protein	35	0	1.7919	1.8902	0	0	0	0	0	0	0	0	0
AT2G13560.1	NAD-ME1 - NAD-dependent malic enzyme 1	70	0	0	0	0	0	0	7.0201	0	0	0	0	0
AT5G34850.1	ATPAP26, PAP26 - purple acid phosphatase 26	55	0	0	0	0	0	0	5.7241	0	0	0	0	0
AT5G49970.1 (+1)	ATPPOX, PDX3, PPOX - pyridoxin (pyrodoxamine) 5'-phosphate oxidase	59	0	0	0	0	0	0	8.155	0	0	0	0	0
AT3G28940.1	AIG2-like (avirulence induced gene) family protein	19	0	0	0	0	0	0	1.3351	0	0	0	0	0
AT1G36310.1 (+1)	S-adenosyl-L-methionine-dependent methyltransferases superfamily protein	45	0	0	0	0	0	0	5.4849	0	0	0	0	0
AT3G21110.1 (+1)	PUR7, PURC, ATPURC - purin 7	46	0	0	0	0	0	0	6.4242	0	0	0	0	0
AT5G42980.1	ATTRX3, ATH3, ATTRXH3, TRXH3, TRX3 - thioredoxin 3	13	0	0	0	2.7092	0	0	0	0	0	0	0	0
AT1G65540.1	LETM1-like protein	84	0	0	0	0	0	0	0	0	0	0	0	6.0182
AT1G52780.1	unknown protein	120	0	0	0	0	0	0	0	0	0	0	0	2.4331
AT5G66680.1	DGL1 - dolichyl-diphosphooligosaccharide-protein glycosyltransferase 48kDa subunit family protein	49	0	0	0	0	0	0	0	0	0	0	0	12.816
AT5G03350.1	Legume lectin family protein	30	0	0	0	0	0	0	0	8.689	0	0	0	0
AT5G52200.1 (+1)	phosphoprotein phosphatase inhibitors	21	0	0	0	0	0	0	0	0	9.5362	0	0	0
AT3G18410.1 (+1)	Complex I subunit NDUFS6	12	0	0	0	0	0	7.2488	0	0	0	0	0	0
AT1G77060.1	Phosphoenolpyruvate carboxylase family protein	37	0	0	0	0	0	0	5.7241	0	0	0	0	0
AT3G04600.1 (+1)	Nucleotidylyl transferase superfamily protein	46	0	0	0	0	0	0	5.7241	0	0	0	0	0
AT3G13490.1	OVA5, ATKRS-2 - Lysyl-tRNA synthetase, class II	68	0	0	0	0	0	0	5.7241	0	0	0	0	0
AT4G17830.2 (+1)	Peptidase M20/M25/M40 family protein	49	0	0	0	0	0	0	5.7241	0	0	0	0	0
AT5G16440.1	IPP1 - isopentenyl diphosphate isomerase 1	33	0	0	0	0	0	0	8.5862	0	0	0	0	0
AT5G16510.1 (+1)	Alpha-1,4-glucan-protein synthase family protein	39	0	0	0	0	0	0	5.7241	0	0	0	0	0
AT4G34350.1	CLB6, ISPH, HDR - 4-hydroxy-3-methylbut-2-enyl diphosphate reductase	53	0	0	0	0	0	0	5.4849	0	0	0	0	0
AT3G16520.3	UGT88A1 - UDP-glucosyl transferase 88A1	51	0	0	0	0	0	0	8.5862	0	0	0	0	0
AT1G60200.1	splicing factor PWI domain-containing protein / RNA recognition motif (RRM)-containing protein	101	0	0	0	0	0	0	0	0	0	0	2.5414	2.3901
AT5G16370.1	AAE5 - acyl activating enzyme 5	61	0	0	0	0	0	0	0	0	0	0	0	2.3901
AT4G33030.1	SQD1 - sulfoquinovosyldiacylglycerol 1	53	0	0	0	0	0	0	4.324	0	0	0	0	0
AT5G53000.1	TAP46 - 2A phosphatase associated protein of 46 kD	46	0	0	0	0	0	0	1.4001	0	0	0	0	0
AT2G47960.1	unknown protein	49	0	0	0	0	0	1.8345	0	0	0	0	0	0
AT1G79230.1 (+2)	ST1, ATMST1, MST1, ATRDH1, STR1 - mercaptopyruvate sulfurtransferase 1	42	0	0	0	0	0	0	1.3443	0	0	0	0	0
AT1G44910.1 (+1)	ATPRP40A, PRP40A - pre-mRNA-processing protein 40A	109	0	0	0	0	0	0	0	0	0	0	14.264	0
AT2G27210.2 (+1)	BSL3 - BRI1 suppressor 1 (BSU1)-like 3	107	0	0	0	0	0	27.053	0	0	0	0	0	0
AT1G69510.1 (+2)	cAMP-regulated phosphoprotein 19-related protein	15	0	0	0	0	0	0	0	0	2.2112	0	0	0
AT1G76880.1	Duplicated homeodomain-like superfamily protein	68	0	0	0	0	0	0	0	0	0	0	0	2.3901
AT5G27700.1	Ribosomal protein S21e	9	0	0	0	2.6432	0	0	0	0	0	0	0	0
AT3G62910.1	APG3 - Peptide chain release factor 1	48	0	0	0	0	0	0	6.472	0	0	0	0	0
AT4G36690.1 (+3)	ATU2AF65A - U2 snRNP auxilliary factor, large subunit, splicing factor	64	0	0	0	0	0	0	0	0	0	0	5.0469	0
AT4G27640.1	ARM repeat superfamily protein	115	0	0	0	0	0	0	0	0	0	0	0	2.3901
AT3G21750.1	UGT71B1 - UDP-glucosyl transferase 71B1	53	0	0	0	0	0	0	5.7241	0	0	0	0	0
AT4G17300.1	NS1, OVA8, ATNS1 - Class II aminoacyl-tRNA and biotin synthetases superfamily protein	64	0	0	0	0	0	0	5.4849	0	0	0	0	0
AT5G10630.1 (+1)	Translation elongation factor EF1A/initiation factor IF2gamma family protein	72	0	0	0	0	0	0	0	0	0	0	0	3.6496
AT1G04350.1	2-oxoglutarate (2OG) and Fe(II)-dependent oxygenase superfamily protein	41	0	0	0	0	0	0	0	0	0	0	0	3.4143
AT1G66520.1	pde194 - formyltransferase, putative	39	1.7726	0	0	0	0	0	0	0	0	0	0	0
AT2G41500.1	LIS, EMB2776 - WD-40 repeat family protein / small nuclear ribonucleoprotein Prp4p-related	62	0	0	0	0	0	0	0	0	0	0	0	4.8232
AT5G39590.1	TLD-domain containing nucleolar protein	60	0	0	0	0	0	0	0	0	0	0	0	2.4331
AT4G38600.1	KAK, UPL3 - HEAT repeat ;HECT-domain (ubiquitin-transferase)	203	0	0	0	0	0	0	0	0	0	0	2.5414	0
