# Supplementary material for: PAPE (Prefractionation-Assisted Phosphoprotein Enrichment): A Novel Approach for Phosphoproteomic Analysis of Green Tissues from Plants
Source: Proteomes. 2013 Dec 5;1(3):254–74. doi: 10.3390/proteomes1030254 (PMC5302697; doi:10.3390/proteomes1030254)
Supplement: Supplementary File 2 [file proteomes-01-00254-s002.xls]

## Sheet: Crude extract
Table S2-a: Identified phosphopeptides in crude extracts (with q-values<0.05)
Color codes:	blue=novel phosphopeptides (from proteins not annotated as phosphoproteins)
	red=novel phosphopeptides (in known phosphoproteins)
	white=known phosphopeptides
Protein code	Description	Sequence	MH+ [Da]	q-Value	PEP	pRS Score	# PSMs	pRS Site Probabilities	Replicate 1	Replicate 2	Replicate 3	Replicate 4	Replicate 5	Replicate 6	(i.e 3 biological & 2 technical replicates)
AT1G02780.1	Ribosomal protein L19e family protein	LAKGPGGDVAPVAAPAPAATPAPTAAVPK	2643.39	0.039518	0.516835	11.7492	1	T(20): 77.1; T(24): 22.9			Medium
AT1G14010.1	emp24/gp25L/p24 family/GOLD family protein	SSIVLLILSILSPVTLSIR	2184.21	0.016281	0.37895	58.2659	11	S(1): 15.3; S(2): 15.3; S(9): 84.3; S(12): 84.6; T(15): 0.5; S(17): 0.0				Medium
AT1G14370.1	protein kinase 2A	VDNSNHSPHANSASSGSKVSSKTSR	2621.17	0.003009	0.157749	27.2159	7	S(4): 0.1; S(7): 0.1; S(12): 0.2; S(14): 0.5; S(15): 1.3; S(17): 3.8; S(20): 13.4; S(21): 13.4; T(23): 13.4; S(24): 53.9		Medium	High
AT1G14610.1	valyl-tRNA synthetase / valine--tRNA ligase (VALRS)	TAISDVEVEYIDIKEKTLLK	2467.2	0.02417	0.505546	9.92858	3	T(1): 30.4; S(4): 30.4; Y(10): 62.4; T(17): 76.9		Low			Medium	Low
AT1G17480.1	IQ-domain 7	GSYAASSLGSELPSFSADEAFTTAMAALIRAPPR	3522.66	0.007179	0.239078	5.34791	2	S(2): 10.3; Y(3): 10.3; S(6): 10.3; S(7): 10.3; S(10): 10.3; S(14): 10.3; S(16): 10.3; T(22): 10.3; T(23): 17.3				High
AT1G32200.1	phospholipid/glycerol acyltransferase family protein	MTLTFSSSAATVAVAAATVTSSARVPVYPLASSTLRGLVSFR	4324.24	0.00167	0.132566	4.22154	19	T(2): 7.7; T(4): 7.7; S(6): 7.7; S(7): 7.7; S(8): 7.7; T(11): 7.7; T(18): 7.7; T(20): 7.7; S(21): 7.7; S(22): 7.7; Y(28): 7.7; S(32): 3.9; S(33): 3.9; T(34): 3.9; S(40): 3.9	High		Low
AT1G32320.1	MAP kinase kinase 10	GSLHDALLAQQVFSEPMVSSLANRILQGLRYLQK	3942.96	0.038116	0.795732	7.93588	3	S(2): 83.1; S(14): 13.7; S(19): 13.0; S(20): 13.0; Y(31): 77.3						Medium
AT1G51120.1	AP2/B3 transcription factor family protein	TTTETSGLTDSVLSLTKRMKPTEVTTTTKPALSNTTK	4499.82	0.043542	0.536938		3	Too many isoforms		Low	Medium	Low
AT1G51130.1	Nse4, component of Smc5/6 DNA repair complex	SQSAHGVSPAEFVNALISGFGQGSLGIDTDETAQVSLK	3977.82	0.010616	0.296665	4.78711	3	S(1): 25.3; S(3): 25.3; S(8): 25.3; S(18): 20.5; S(24): 20.5; T(29): 20.5; T(32): 24.2; S(36): 38.4		Low		Medium
AT1G51310.1	transferases;tRNA (5-methylaminomethyl-2-thiouridylate)-methyltransferases	HAFIVDQYLSCSMPEKPLRVAVLLSGGVDSSVALR	3894.96	0.009368	0.286291	4.4972	8	Y(8): 6.7; S(10): 6.7; S(12): 6.7; S(25): 19.0; S(30): 19.0; S(31): 41.8		Low			High	Low
AT1G56710.1	Pectin lyase-like superfamily protein	NVTCGPSHGISIGSLGVHNSQAYVSNITVTNSTIWNSDNGVRIK	4894.2	0.027961	0.543715		2	Too many isoforms					Medium
AT1G70200.1	RNA-binding (RRM/RBD/RNP motifs) family protein	QFTGQSLAFGKVIKQIK	1973.05	0.047422	0.652238	34.9581	12	T(3): 86.5; S(6): 13.5	Low	Medium	Low	Low	Low	Low
AT2G04842.1	threonyl-tRNA synthetase, putative / threonine--tRNA ligase, putative	FGGELGTIPVDDLINKINIAVETR	2664.38	0.002166	0.108943	13.3192	4	T(7): 94.4; T(23): 5.6	Medium	Medium	Low	High
AT2G20750.1	expansin B1	GPFSVKLTTLSNNKTLSATDVIPSNWVPK	3274.62	0.021199	0.595659	12.1658	13	S(4): 3.9; T(8): 31.1; T(9): 31.1; S(11): 31.1; T(15): 31.1; S(17): 31.1; T(19): 31.1; S(24): 9.7	Low	Low	Low	Low	Medium	Medium
AT2G24270.2	aldehyde dehydrogenase 11A3	AGTGLFAEILDGEVYK	1762.82	0.001248	0.0320495	56.002	4	T(3): 100.0; Y(15): 0.0		Medium	High	High	Medium
AT2G24940.1	membrane-associated progesterone binding protein 2	MEFTAEQLSQYNGTDESKPIYVAIK	2942.36	0.002158	0.0840649	2.68466	6	T(4): 18.1; S(9): 18.1; Y(11): 18.1; T(14): 18.1; S(17): 18.1; Y(21): 9.7		High			High	High
AT2G33210.1	heat shock protein 60-2	VTDALNATKAAVEEGIVPGGGVALLYASK	2894.5	0.043878	0.659459	3.34085	2	T(2): 12.3; T(8): 17.4; Y(26): 25.8; S(28): 44.5					Medium
AT2G35040.2	AICARFT/IMPCHase bienzyme family protein	DLASLGNGLQELGYTIVSTGGTASTLENAGVSVTKVEK	4019.86	0.033784	0.783906	0.00819022	1	S(4): 29.8; Y(14): 30.8; T(15): 29.9; S(18): 30.7; T(19): 29.9; T(22): 29.5; S(24): 29.5; T(25): 29.7; S(32): 30.5; T(34): 29.7						Medium
AT2G38280.1	AMP deaminase, putative / myoadenylate deaminase, putative	SNGHVYVDEIPPGLPRLHTPSEGRASVHGASSIR	3832.74	0.022388	0.638191	31.7349	2	S(1): 33.1; Y(6): 33.1; T(19): 33.1; S(21): 4.1; S(26): 95.3; S(31): 50.7; S(32): 50.7						Medium
AT2G40840.1	disproportionating enzyme 2	VEKPLGVFMNKSDQDDSVVVQFK	2689.28	0.021343	0.603115	32.6158	1	S(12): 0.4; S(17): 99.6						Medium
AT2G45820.1	Remorin family protein	ALAVVEKPIEEHTPK	1740.9	0.001196	0.108102	47.4275	3	T(13): 100.0	High	High				High
AT3G12580.1	heat shock protein 70	VQDLLLLDVTPLSLGLETAGGVMTVLIPRNTTIPTK	4029.06	0.017353	0.372216	1.92865e-15	1	T(10): 44.4; S(13): 44.4; T(18): 42.2; T(24): 42.2; T(31): 42.2; T(32): 42.2; T(35): 42.2	Medium
AT3G23490.1	cyanase	TFSQLAAETGLTNVYVAQLLR	2455.16	0.009966	0.291701	7.1468	2	T(1): 26.7; S(3): 26.7; T(9): 51.9; T(12): 63.6; Y(15): 31.2				High
AT3G28360.1	P-glycoprotein 16	TTGRAIAEAGTMTTDLAK	1967.86	0.011841	0.36039	20.1891	2	T(1): 58.8; T(2): 58.8; T(11): 34.1; T(13): 34.1; T(14): 14.1			Low			Medium
AT3G42850.1	Mevalonate/galactokinase family protein	HAEARHHSRDTPILEIVSFGSELSNR	3038.44	0.028666	0.74533	2.98942e-14	23	S(8): 19.6; T(11): 19.6; S(18): 19.9; S(21): 19.9; S(24): 21.1	Low	Low	Low	Low	Low	Medium
AT3G54280.1	DNA binding;ATP binding;nucleic acid binding;binding;helicases;ATP binding;DNA binding;helicases	GTLEEKVMSLQK	1442.7	0.026155	0.492686	60.247	10	T(2): 0.0; S(9): 100.0	Low	Medium	Medium	Low	Low	Medium
AT3G62100.1	indole-3-acetic acid inducible 30	GRSSSSSSIESSCKSNPFGVSSSNTR	2772.19	0.026131	0.525899	7.19841	24	S(3): 10.8; S(4): 10.8; S(5): 10.8; S(6): 10.8; S(7): 10.8; S(8): 10.8; S(11): 10.8; S(12): 10.8; S(15): 3.7; S(21): 3.7; S(22): 2.1; S(23): 2.1; T(25): 2.1	Low		Low		Medium
AT4G01510.1	Arv1-like protein	TNDGSNVSMSFLFESLEVLVNVLSANFAFVFSFAFAAK	4359.94	0.012785	0.357662	7.11218	1	T(1): 51.8; S(5): 42.9; S(8): 37.1; S(10): 37.1; S(15): 37.4; S(24): 40.0; S(32): 53.6					Medium
AT4G01985.1	unknown protein	GSVGVGAGAGGGASGGIGVGGGGGGGGGIGGSGGVGAGGGVGGGAGGAIGGGASGGAGGGGKGRGR	4742.22	0.000518	0.0171121	0.343013	11	S(2): 26.2; S(14): 25.0; S(32): 24.5; S(54): 24.3		High		Medium	Medium	High
AT4G01985.1	unknown protein	GSVGVGAGAGGGASGGIGVGGGGGGGGGIGGSGGVGAGGGVGGGAGGAIGGGASGGAGGGGK	4475.88	0.032914	0.582725	2.12009	4	S(2): 74.2; S(14): 68.2; S(32): 77.5; S(54): 80.1					Low	Low
AT4G04180.1	P-loop containing nucleoside triphosphate hydrolases superfamily protein	VLSVLLRQIDGFEQEK	1954	0.02444	0.473486	13.4607	3	S(3): 100.0		Medium			Low	Low
AT4G16830.1	Hyaluronan / mRNA binding family	ATLNPFDLLDDDAEDPSQLAVAIEK	2780.28	0.001	0.0151447	23.8085	1	T(2): 99.1; S(17): 0.9						High
AT4G18501.1	unknown protein	KPLQDITNLFVSSSPLSSSFLIR	2629.36	0.036814	0.573834	7.60924	3	T(7): 3.4; S(12): 9.4; S(13): 9.4; S(14): 9.4; S(17): 16.9; S(18): 16.9; S(19): 34.6				Low
AT4G18810.2	NAD(P)-binding Rossmann-fold superfamily protein	GIVSTTNNGGFTSVRTKNFPEAENVSAYDGLELR	3723.77	0.003062	0.178009	0.384464	2	S(4): 11.2; T(5): 11.2; T(6): 11.2; T(12): 12.3; S(13): 12.3; T(16): 12.3; S(26): 13.6; Y(28): 15.9	High
AT4G21620.1	glycine-rich protein	SGNDGLGFGGVPGSGFIPGFGNGFPGTGVGGGYGGGFGGPSGGFGK	4181.81	0.033473	0.49741	0.012941	2	S(1): 40.3; S(14): 40.0; T(27): 40.2; Y(33): 39.8; S(41): 39.8	Medium
AT4G23670.1	Polyketide cyclase/dehydrase and lipid transport superfamily protein	ATSGTYVTEVPLKGSAEK	1917.91	0.032722	0.492388	48.1384	4	T(2): 24.5; S(3): 24.5; T(5): 24.5; Y(6): 24.5; T(8): 1.9; S(15): 0.0	Medium
AT4G31700.1	ribosomal protein S6	SRLSSAAAKPSVTA	1425.71	0.00019	0.049919	88.2757	30	S(1): 0.0; S(4): 92.2; S(5): 7.7; S(11): 0.1; T(13): 0.0	High	High	High	High	High	High
AT4G38740.1;AT2G21130.1	rotamase CYP 1 / Cyclophilin-like peptidyl-prolyl cis-trans isomerase family protein	HTGPGILSMANAGANTNGSQFFICTVK	2873.3	0.027543	0.459159	36.8102	3	T(2): 0.7; S(8): 95.1; T(16): 2.0; S(19): 2.0; T(25): 0.1	Medium	Low
AT5G02460.1	Dof-type zinc finger DNA-binding family protein	LMPPLDFTDNFTLQYGAVSAPSYHIGGGSSGGAAALLNGFDQWR	4759.12	0.03584	0.567325	1.24818	5	T(8): 25.0; T(12): 25.0; Y(15): 25.0; S(19): 25.0; S(22): 25.0; Y(23): 25.0; S(29): 25.0; S(30): 25.0				Medium
AT5G04380.1	S-adenosyl-L-methionine-dependent methyltransferases superfamily protein	DLVFEGLLSASKVYSFK	1982.97	0.000892	0.0791496	10.332	10	S(9): 10.6; S(11): 10.6; Y(14): 10.6; S(15): 68.2	Low	Low	High
AT5G04430.1	binding to TOMV RNA 1L (long form)	RSPEPHDSSEADSAEKPTHIR	2426.07	0	1.82085e-09	20.1292	15	S(2): 80.7; S(8): 8.4; S(9): 8.4; S(13): 1.8; T(18): 0.8		Low	High	High	High	High
AT5G04430.1	binding to TOMV RNA 1L (long form)	SPEPHDSSEADSAEKPTHIR	2269.97	0	0.000124651	8.66132	8	S(1): 50.7; S(7): 15.7; S(8): 15.7; S(12): 10.7; T(17): 7.3					High	High
AT5G05890.1	UDP-Glycosyltransferase superfamily protein	WAPQQDVLKHRAIGGFLTHNGWSSTVESVCEAVPMICLPFR	4774.29	0.042016	0.795732	2.41082e-14	4	T(18): 20.0; S(23): 20.0; S(24): 20.0; T(25): 20.0; S(28): 20.0						Low
AT5G14740.2	carbonic anhydrase 2	GNESYEDAIEALKK	1646.72	0.003091	0.160506	27.63	2	S(4): 20.8; Y(5): 79.2			High
AT5G17990.1	tryptophan biosynthesis 1	LSGILTSFNAVDDASSSCGRSNLTGVRIFPTLSR	3838.7	0.017959	0.377174	4.61179	1	S(2): 24.9; T(6): 25.9; S(7): 27.2; S(15): 31.7; S(16): 31.7; S(17): 31.7; S(21): 32.0; T(24): 32.0; T(31): 33.8; S(33): 29.3	Medium
AT5G23890.1	unknown protein	KKSLIEGVVGAGVAGIILFLGLSYAAASFSK	3226.69	0.0239	0.464686	6.03099	1	S(3): 24.9; S(23): 36.3; Y(24): 36.3; S(28): 51.2; S(30): 51.2		Medium
AT5G25460.1	unknown protein	NILKNGGFEEGPLVLPGSTTGVLIPPFIEDDHSPLPGWMVESLK	4940.33	0.001065	0.0473831	0	8	S(18): 60.0; T(19): 60.0; T(20): 60.0; S(33): 60.0; S(42): 60.0		High
AT5G35570.1	O-fucosyltransferase family protein	KEVLPLLKQHIVMYLTHTDSR	2601.35	0.013762	0.342974	6.98013	9	Y(14): 10.1; T(16): 22.2; T(18): 22.2; S(20): 45.6	Medium	Medium		Medium
AT5G43830.1	Aluminium induced protein with YGL and LRDR motifs	VDSSGDVCGATFKVDAETKR	2221.98	0	0.000664359	21.5576	3	S(3): 2.4; S(4): 2.4; T(11): 92.8; T(18): 2.4		High
AT5G47210.1	Hyaluronan / mRNA binding family	ASLNPFDLLGDDAEDPSQLAVALSQK	2794.31	0	0.000695729	63.7312	12	S(2): 100.0; S(17): 0.0; S(24): 0.0		High	High	High	High	High
AT5G57590.1	adenosylmethionine-8-amino-7-oxononanoate transaminases	FGHVMFPENVYEPALKCAELLLDGVGKGWASR	3670.77	0.048751	0.6902	2.91047	1	Y(11): 33.9; S(31): 66.1					Medium
AT5G58140.4	phototropin 2	KIQASGETVGLHHFKPIKPLGSGDTGSVHLVELKGTGELYAMK	4610.38	0.002651	0.0438936	3.61623e-14	3	S(5): 13.6; T(8): 13.6; S(22): 13.6; T(25): 13.6; S(27): 13.6; T(36): 14.9; Y(40): 17.1	Low					High
AT5G60600.3	4-hydroxy-3-methylbut-2-enyl diphosphate synthase	ATGVLPAPVSGIKIPDSKVGFGK	2478.18	0.040457	0.535816	18.8883	1	T(2): 100.0; S(10): 100.0; S(17): 100.0	Medium

## Sheet: 40% AS
Table S2-b: Identified phosphopeptides in 40%AS fraction
Color codes:	blue=novel phosphopeptides (from proteins not annotated as phosphoproteins)
	red=novel phosphopeptides (in known phosphoproteins)
	white=known phosphopeptides
Protein code	Description	Sequence	MH+ [Da]	q-Value	PEP	pRS Score	# PSMs	pRS Site Probabilities	Replicate 1	Replicate 2	Replicate 3	Replicate 4	Replicate 5	Replicate 6	(i.e 3 biological & 2 technical replicates)
AT1G01100.1;AT5G47700.1	60S acidic ribosomal protein family	KKDEPAEESDGDLGFGLFD	2148.9	0	4.97934e-05	168.363	3	S(9): 100.0		High		High
AT1G04820.1;AT5G19770.1	tubulin alpha-4 chain / tubulin alpha-3	LADNCTGLQGFLVFNAVGGGTGSGLGSLLLERLSVDYGK	4035.98	0.003277	0.114275	14.6984	1	T(6): 83.5; T(21): 2.8; S(23): 2.8; S(27): 2.8; S(34): 4.0; Y(37): 4.0	High
AT1G06950.1	translocon at the inner envelope membrane of chloroplasts 110	LATSAVVLAASLATGYGLGLR	2164.09	0.030431	0.4374	6.06712	2	T(3): 32.9; S(4): 32.9; S(11): 47.8; T(14): 51.7; Y(16): 34.7	Low		Medium
AT1G07110.1	fructose-2,6-bisphosphatase	SLSASSFLIDTK	1348.64	0	0.000365759	130.922	20	S(1): 0.2; S(3): 99.8; S(5): 0.0; S(6): 0.0; T(11): 0.0	High		High	High	High	High
AT1G09830.1	Glycinamide ribonucleotide (GAR) synthetase	VGDGDTGPNTGGMGAYSPAPVLTK	2421.99	0.00936	0.211544	15.662	2	T(6): 58.7; T(10): 27.1; Y(16): 16.4; S(17): 14.9; T(23): 83.0				Medium		High
AT1G17100.1	SOUL heme-binding family protein	LSFLLSLLSGGSDLLGPDAESGVAQIGK	2824.43	0.038178	0.67092	6.03843	2	S(2): 20.1; S(6): 12.6; S(9): 12.6; S(12): 12.6; S(21): 42.0		Medium				Low
AT1G21380.1	Target of Myb protein 1	SPEHALFTKPVYDQTEQLPPAPWETQEPR	3471.63	0	2.38227e-05	73.8699	22	S(1): 99.3; T(8): 0.4; Y(12): 0.4; T(15): 0.0; T(25): 0.0	High		High	High	High	High
AT1G23740.1	Oxidoreductase, zinc-binding dehydrogenase family protein	NAALATTTATTPVLRR	1736.91	0.015443	0.409855	40.0507	1	T(6): 12.5; T(7): 12.5; T(8): 59.5; T(10): 12.5; T(11): 3.0				Medium
AT1G23760.1	BURP domain-containing protein	FNSYGTSATGGSGDFKNYQSGVNNPTTRFK	3522.35	0.011237	0.290352		2	Too many isoforms			Medium
AT1G30400.1	multidrug resistance-associated protein 1	ADRPTLSNINLDIPLGSLVAVVGSTGEGK	3053.48	0.034901	0.74425	2.25667	8	T(5): 28.7; S(7): 69.9; S(17): 57.0; S(24): 22.2; T(25): 22.2		Low		Medium	Medium	Low
AT1G31730.1	Adaptin family protein	WGRPSYQSTTAASSTTPQAANGISTHSDAGVGSSSSKPR	4772.47	0.017271	0.348615		1	Too many isoforms			Medium
AT1G37130.1	nitrate reductase 2	SDSPKAHQNQTTNQTVFLKPAK	2520.22	0	3.0368e-05	60.9885	31	S(1): 9.8; S(3): 78.9; T(11): 9.8; T(12): 1.4; T(15): 0.2	High	High	High	High	High	High
AT1G37130.1	nitrate reductase 2	VHDDDEDVSSEDENETHNSNAVYYK	2991.14	0	3.88448e-08	104.142	22	S(9): 8.6; S(10): 91.4; T(16): 0.0; S(19): 0.0; Y(23): 0.0; Y(24): 0.0		High	High	High	High	High
AT1G52000.1	Mannose-binding lectin superfamily protein	SNDGANNGASGIESNAGSTGTNFGAGGTGGIGDTESDAGGSK	4196.37	0.000809	0.0630786		1	Too many isoforms			High
AT1G72150.1	PATELLIN 1	SSFVFVSDFRNAPGLGKR	2064.01	0.039425	0.626425	38.5197	1	S(1): 1.0; S(2): 1.0; S(7): 98.0					Medium
AT1G78060.1	Glycosyl hydrolase family protein	LTIDEKISQLVNTAPGIPR	2145.13	0.012504	0.347871	11.6378	1	T(2): 21.6; S(8): 56.7; T(13): 21.6		Medium
AT1G79280.2	nuclear pore anchor	IGSLQEDLSSCKDAATTTEEQYTAELFTANK	3581.52	0.001977	0.0789861	11.4506	3	S(3): 11.9; S(9): 39.4; S(10): 39.4; T(16): 18.2; T(17): 18.2; T(18): 18.2; Y(22): 18.2; T(23): 18.2; T(28): 18.2	High
AT2G04270.1	RNAse E/G-like	LPQFSVSSRASWLVSSGFPLSSYMFSHVER	3548.61	0.028777	0.661851	18.5343	5	S(5): 2.0; S(7): 2.0; S(8): 2.0; S(11): 2.7; S(15): 4.7; S(16): 12.7; S(21): 43.5; S(22): 43.5; Y(23): 43.5; S(26): 43.5				Medium
AT2G04842.1	threonyl-tRNA synthetase, putative / threonine--tRNA ligase, putative	SRFGGELGTIPVDDLINKINIAVETR	3067.43	0.041246	0.630782	38.363	1	S(1): 100.0; T(9): 100.0; T(25): 100.0	Medium
AT2G26890.1	DNAJ heat shock N-terminal domain-containing protein	LTGLCADESLTPYNATAADVLKALLTPK	3106.49	0.019559	0.495046	3.56801e-14	7	T(2): 21.7; S(9): 35.7; T(11): 35.7; Y(13): 35.7; T(16): 35.7; T(26): 35.7				Low
AT2G26890.1	DNAJ heat shock N-terminal domain-containing protein	RETMSSGEVKAEEIGSDGVNESTDPSSLPGQTPQER	4044.64	0.030972	0.552894	17.4839	1	T(3): 4.2; S(5): 4.2; S(6): 5.5; S(16): 8.8; S(22): 55.5; T(23): 55.5; S(26): 55.5; S(27): 55.5; T(32): 55.5					Medium
AT2G33240.1	myosin XI D	LPHLYGNEIMEQYKGTDFGELSPHPFAVADSAYR	4012.76	0.037465	0.667358	9.64327e-15	3	Y(5): 33.3; Y(13): 33.3; T(16): 33.3; S(22): 33.3; S(31): 33.3; Y(33): 33.3		Medium
AT2G39730.1;AT2G39730.2	rubisco activase	MGGTTQYTVNNQMVNATLMNIADNPTNVQLPGMYNK	4023.82	0.041705	0.808241	20.3544	1	T(4): 5.1; T(5): 5.1; Y(7): 23.4; T(8): 58.0; T(17): 5.1; T(26): 2.7; Y(34): 0.7				Medium
AT2G45420.1	LOB domain-containing protein 18	SGGGNTITAVGGGGGGCGGGGSSGGGGSSGGGGGGPCGACKFLR	3774.47	0.010506	0.259391	1.24818	6	S(1): 26.1; T(6): 26.1; T(8): 26.1; S(22): 26.1; S(23): 26.1; S(28): 34.9; S(29): 34.9	Medium
AT2G45820.1	Remorin family protein	ALAVVEKPIEEHTPK	1740.89	0	0.00544616	51.607	7	T(13): 100.0	High	High	High	High	High	High
AT3G06510.1	Glycosyl hydrolase superfamily protein	MELFALLIKVAGLLATVTVGANVVSYSR	3015.64	0.018763	0.369721	2.53472	5	T(16): 20.0; T(18): 20.0; S(25): 20.0; Y(26): 20.0; S(27): 20.0		Low				Medium
AT3G06650.1;AT5G49460.1	ATP-citrate lyase B-1 / ATP citrate lyase subunit B 2	ANNLVLNVDGAIGSLFLDLLAGSGMFTK	2930.46	0.044228	0.66215	2.13865	1	S(14): 27.2; S(23): 41.3; T(27): 31.6					Medium
AT3G12345.1	unknown protein	GSSGSPSKGTGIYLPPVSLKEAVSGGLK	2753.42	0.014871	0.306679	5.85025	13	S(2): 7.0; S(3): 7.0; S(5): 15.7; S(7): 41.3; T(10): 15.7; Y(13): 7.0; S(18): 2.5; S(24): 3.8	Low	Low	Low	Low	Medium	Low
AT3G13290.1	varicose-related	SDSTVSREANLVESTLETSGMKPTELPSVGSVPKPSILVNR	4472.17	0.039565	0.792315	4.35481	1	S(1): 16.4; S(3): 16.4; T(4): 16.4; S(6): 16.4; S(14): 16.4; T(15): 16.4; T(18): 16.4; S(19): 16.4; T(24): 16.4; S(28): 16.4; S(31): 17.9; S(36): 17.9				Medium
AT3G14415.1;AT3G14420.1	Aldolase-type TIM barrel family protein	MEITNVTEYDAIAK	1677.73	0.007086	0.193034	32.4659	2	T(4): 11.3; T(7): 77.3; Y(9): 11.3	High
AT3G15090.1	GroES-like zinc-binding alcohol dehydrogenase family protein	DVSGEVAAIGTSVK	1412.67	0.048002	0.693692	29.0064	6	S(3): 0.2; T(11): 87.5; S(12): 12.3	Low		Low		Medium
AT3G16950.1;AT4G16155.1	lipoamide dehydrogenase 1 / dihydrolipoyl dehydrogenases	DIIIATGSVPFVPK	1536.8	0.043742	0.515851	37.6491	2	T(6): 12.3; S(8): 87.7			Low
AT3G19420.1	PTEN 2	VSISGNKGSSQPVQGVTVSKGEATEKPSGAGVNASSSSESEFK	4515.95	0.04077	0.497507		1	Too many isoforms			Medium
AT3G22760.1	Tesmin/TSO1-like CXC domain-containing protein	VIRNSDSIIEVGEDASK	1911.89	0.042639	0.821645	51.6401	1	S(5): 0.0; S(7): 0.1; S(16): 99.9				Medium
AT3G25070.1	RPM1 interacting protein 4	SRPKPTNLRADESPEKVTVVPK	2528.32	0.008957	0.26124	23.4497	3	S(1): 0.3; T(6): 1.6; S(13): 10.5; T(18): 87.5		High
AT3G43300.2	HOPM interactor 7	SSVAEVTVPSSPYKHEDPTEPDSR	2694.18	0	3.29169e-05	45.9768	59	S(1): 0.1; S(2): 0.1; T(7): 1.7; S(10): 73.2; S(11): 19.3; Y(13): 5.5; T(19): 0.0; S(23): 0.0	High	High	High	High	High	High
AT3G51740.1	inflorescence meristem receptor-like kinase 2	TSEKTVSAGVAGTASAGGEMGGK	2212.92	0.003485	0.0921983	4.02928	3	T(1): 22.2; S(2): 22.2; T(5): 22.2; S(7): 22.2; T(13): 55.6; S(15): 55.6						High
AT4G13150.1	unknown protein	VSGKGVPFIVKLGLGLGLAMIITVISVALK	3233.74	0.026343	0.479844	14.2124	9	S(2): 100.0; T(23): 100.0; S(26): 100.0		Medium	Low	Low	Low	Medium
AT4G13350.1	NSP (nuclear shuttle protein)-interacting GTPase	SMSAPSLQPLQGVPSGGLQSSEVKPSGR	2861.38	0	0.00963701	21.2799	13	S(1): 13.6; S(3): 13.6; S(6): 62.2; S(15): 3.5; S(20): 3.5; S(21): 3.5; S(26): 0.2		High	High		High	High
AT4G13350.1	NSP (nuclear shuttle protein)-interacting GTPase	DLGSASPPVARPVR	1501.75	0.003835	0.0977471	35.2275	8	S(4): 4.8; S(6): 95.2			Low	High	Low	High
AT4G14370.1	Disease resistance protein (TIR-NBS-LRR class) family	DEHVIAMLADSNLDVKQGLKILTNK	2845.47	0.032434	0.623014	12.372	2	S(11): 5.6; T(23): 94.4		Medium				Low
AT4G14700.1	origin recognition complex 1	KSYLSPSSTSLTPPQTPETLTPLRR	2837.45	0.010815	0.240429	2.41082e-15	8	S(2): 9.1; Y(3): 9.1; S(5): 9.1; S(7): 9.1; S(8): 9.1; T(9): 9.1; S(10): 9.1; T(12): 9.1; T(16): 9.1; T(19): 9.1; T(21): 9.1						Medium
AT4G15545.1	unknown protein	LTPPGSPPILSASGTPK	1699.87	0.000591	0.0494433	46.4568	27	T(2): 0.2; S(6): 99.5; S(11): 0.2; S(13): 0.1; T(15): 0.1	High	High	High	High	High
AT4G17890.2	ARF-GAP domain 8	AIAEETNSGLLSSPVATSQLPEVSNGVSSYSVK	3561.57	0.025019	0.404121	2.23689	1	T(6): 25.5; S(8): 25.5; S(12): 25.5; S(13): 25.5; T(17): 24.5; S(18): 24.5; S(24): 29.0; S(28): 30.0; S(29): 30.0; Y(30): 30.0; S(31): 30.0			Medium
AT4G21210.1	PPDK regulatory protein	ACKLWKIPSLDILGPITESISSHLGTNPSGLSR	3707.83	0.018264	0.372052	5.96616	1	S(9): 31.0; T(17): 31.0; S(19): 19.0; S(21): 19.0; S(22): 19.0; T(26): 19.0; S(29): 31.0; S(32): 31.0					Medium
AT4G24280.1	chloroplast heat shock protein 70-1	GVPQIEVKFDIDANGILSVSAVDKGTGK	2937.49	0.013234	0.310854	6.2683	2	S(18): 57.5; S(20): 21.2; T(26): 21.2			Medium
AT4G25530.1	FLOWERING WAGENINGEN	IVNNGMLVLQEIWNDASGAMVVYAPVETNSIELVKR	4132.96	0.011505	0.277794	2.89535	19	S(17): 53.4; Y(23): 53.4; T(28): 46.6; S(30): 46.6	Medium	Medium			Medium	Low
AT4G27430.1	COP1-interacting protein 7	HYSEDVGEVQASQEKPVSPK	2294.03	0.000132	0.00128641	61.7646	1	Y(2): 0.0; S(3): 0.0; S(12): 0.0; S(18): 100.0						High
AT4G28000.1	P-loop containing nucleoside triphosphate hydrolases superfamily protein	HTRNLAPGSK	1160.55	0.03559	0.754117	49.5948	3	T(2): 0.0; S(9): 100.0	Low			Medium		Low
AT4G31700.1	ribosomal protein S6	SRLSSAAAKPSVTA	1425.71	0.000211	0.00709959	77.1025	10	S(1): 0.8; S(4): 91.5; S(5): 7.7; S(11): 0.0; T(13): 0.0					High	High
AT4G33470.1	histone deacetylase 14	ISDIGKGKGEGTTLNLPLPGGSGDIAMR	2914.38	0.042196	0.654615	2.35479	2	S(2): 36.8; T(12): 54.4; T(13): 54.4; S(22): 54.4						Medium
AT4G34190.1	stress enhanced protein 1	ALSQVSASLAFSLPNSGALKLATITNPTSTCR	3356.7	0.008362	0.193362	1.99195	17	S(3): 7.4; S(6): 7.4; S(8): 7.4; S(12): 7.4; S(16): 11.7; T(23): 11.7; T(25): 11.7; T(28): 11.7; S(29): 11.7; T(30): 11.7		Low		Low	High	Medium
AT4G39690.1	unknown protein	GTLRHFSLIPPGGGGILAHSLAHVASSLK	3053.53	0.013502	0.280779	2.33615	6	T(2): 46.1; S(7): 46.1; S(20): 34.1; S(26): 36.9; S(27): 36.9						Medium
AT5G04430.1	binding to TOMV RNA 1L (long form)	RSPEPHDSSEADSAEKPTHIR	2426.07	0	9.57002e-06	46.3792	10	S(2): 98.1; S(8): 1.0; S(9): 1.0; S(13): 0.0; T(18): 0.0	High	High	High	High	High	High
AT5G04430.1	binding to TOMV RNA 1L (long form)	SPEPHDSSEADSAEKPTHIR	2269.96	0.001774	0.0416669	1.69725	5	S(1): 10.5; S(7): 17.6; S(8): 17.6; S(12): 36.6; T(17): 17.6			High		High	Medium
AT5G06370.1	NC domain-containing protein-related	RLSSGLFQVLDPPLAAIALPSTS	2593.21	0.028907	0.582228	2.93961	6	S(3): 69.0; S(4): 69.0; S(21): 54.0; T(22): 54.0; S(23): 54.0		Medium			Low
AT5G15090.1	voltage dependent anion channel 3	FSVTTYSSTGVAITTTGTNK	2115.98	0.040776	0.693624	3.38915	6	S(2): 9.1; T(4): 9.1; T(5): 9.1; Y(6): 9.1; S(7): 9.1; S(8): 9.1; T(9): 9.1; T(14): 9.1; T(15): 9.1; T(16): 9.1; T(18): 9.1		Medium		Low
AT5G20340.1	beta-1,3-glucanase 5	SIDITKIR	1025.54	0.004458	0.186919	82.7156	3	S(1): 0.0; T(5): 100.0	Medium		High	Medium
AT5G22330.1	P-loop containing nucleoside triphosphate hydrolases superfamily protein	ALLLAGPPGTGKTALALGISQELGSKVPFCPMVGSEVYSSEVK	4679.16	0.023714	0.438322	2.26389	1	T(10): 50.0; T(13): 50.0; S(20): 50.0; S(25): 50.0; S(35): 50.0; Y(38): 50.0; S(39): 50.0; S(40): 50.0						Medium
AT5G35410.1	Protein kinase superfamily protein	LYEVLASPSKIYIVLEFVTGGELFDRIVHK	3595.82	0.006992	0.172017	0.618423	6	Y(2): 38.3; S(7): 43.4; S(9): 38.7; Y(12): 42.0; T(19): 37.6				High
AT5G52310.1	low-temperature-responsive protein 78 (LTI78) / desiccation-responsive protein 29A (RD29A)	IKGWFGGGATDEVKPESPHSVEEAPK	2832.32	0	0.00015799	59.637	14	T(10): 0.0; S(17): 98.7; S(20): 1.3	High	High		High	High	High
AT5G52310.1	low-temperature-responsive protein 78 (LTI78) / desiccation-responsive protein 29A (RD29A)	SPHSVEESPQSLGSTVVPVQK	2272.09	0	0.000239707	125.713	10	S(1): 99.3; S(4): 0.7; S(8): 0.0; S(11): 0.0; S(14): 0.0; T(15): 0.0		High
AT5G52310.1	low-temperature-responsive protein 78 (LTI78) / desiccation-responsive protein 29A (RD29A)	GWFGGGATDEVKPESPHSVEEAPK	2591.14	0	7.25676e-05	54.7494	6	T(8): 0.4; S(15): 94.7; S(18): 5.0		High
AT5G52790.1	CBS domain-containing protein with a domain of unknown function (DUF21)	LLDLLLGKRHSTLLGR	1885.08	0.023892	0.399365	51.1407	11	S(11): 1.7; T(12): 98.3	Low	Low	Medium	Low	Low	Low
AT5G53620.1	unknown protein	LDSHSQNQKPEELNGQVSPDEHSGAK	2911.28	0	7.47527e-05	32.9461	9	S(3): 0.1; S(5): 0.1; S(18): 96.3; S(23): 3.5	High		High	High		High
AT5G55230.1	microtubule-associated proteins 65-1	EEAASSPVSGAADHQVPASP	1986.84	0	0.000180672	74.2606	1	S(5): 0.0; S(6): 0.0; S(9): 0.0; S(19): 100.0					High
AT5G56500.1	TCP-1/cpn60 chaperonin family protein	TNDLAGDGTTTSVVLAQGLIAEGVKVVAAGANPVLITRGIEK	4359.17	0.010409	0.224194	8.40547	4	T(1): 43.3; T(9): 43.3; T(10): 43.3; T(11): 43.3; S(12): 43.3; T(37): 83.6				Low	Medium	Low
AT5G56740.1	histone acetyltransferase of the GNAT family 2	LSQILVLPSFQGK	1509.8	0.011279	0.247102	30.019	4	S(2): 0.4; S(9): 99.6	Medium		Low		Medium	Low
AT5G61210.1	soluble N-ethylmaleimide-sensitive factor adaptor protein 33	SSKPNPFDSDDESDNKHTLNPSKR	2795.22	0	3.14691e-05	25.2878	4	S(1): 5.7; S(2): 5.7; S(9): 82.9; S(13): 1.9; T(18): 1.9; S(22): 1.9	High			High	High
ATMG00285.1	NADH dehydrogenase 2A	KSEFSTEAGSK	1250.52	0.019997	0.395345	5.5952	9	S(2): 8.4; S(5): 30.5; T(6): 30.5; S(10): 30.5	Low		Low		Medium	Low

## Sheet: MOAC
Table S2-c: Identified phosphopeptides in crude extract+MOAC fraction
Color codes:	blue=novel phosphopeptides (from proteins not annotated as phosphoproteins)
	red=novel phosphopeptides (in known phosphoproteins)
	white=known phosphopeptides
Protein code	Description	Sequence	MH+ [Da]	q-Value	PEP	pRS Score	# PSMs	pRS Site Probabilities	Replicate 1	Replicate 2	Replicate 3	Replicate 4	Replicate 5	Replicate 6	(i.e 3 biological & 2 technical replicates)
AT1G01100.1;AT5G47700.1	60S acidic ribosomal protein family	KKDEPAEESDGDLGFGLFD	2148.9	0	5.51523e-05	176.445	9	S(9): 100.0		High			High	High
AT1G01100.1;AT5G47700.1	60S acidic ribosomal protein family	STVGELACSYAVMILEDEGIAITADK	2836.32	0.000976	0.0167202	48.3366	4	S(1): 25.0; T(2): 25.0; S(9): 25.0; Y(10): 25.0; T(23): 0.0		High
AT1G06530.1	Tropomyosin-related	TELQKWITEKMVVEDSLK	2257.11	0.019203	0.436242	22.8801	1	T(1): 0.5; T(8): 0.6; S(16): 98.9						Medium
AT1G13960.2	WRKY DNA-binding protein 4	DNTANINGSSINNNRGSSELGASQFQTNSSNK	3406.48	0.002885	0.0823246	2.5933	2	T(3): 7.9; S(9): 8.7; S(10): 7.9; S(17): 8.7; S(18): 8.7; S(23): 18.6; T(27): 13.2; S(29): 13.2; S(30): 13.2		High
AT1G21380.1	Target of Myb protein 1	SPEHALFTKPVYDQTEQLPPAPWETQEPR	3471.61	0	0.000240623	58.4939	24	S(1): 77.3; T(8): 10.5; Y(12): 10.5; T(15): 1.6; T(25): 0.0	High	High				High
AT1G21650.3	Preprotein translocase SecA family protein	TGEGKTLVSTLAAYLNALTGEGVHVVTVNDYLAQR	3980.82	0.032771	0.676301	3.05533	7	T(1): 46.6; T(6): 49.2; S(9): 50.8; T(10): 51.3; Y(14): 50.2; T(19): 52.0; T(27): 52.4; Y(31): 47.5		Medium
AT1G23170.1	unknown protein	SIATTAALLAATGFAGAAALSANPEAIAYLK	3079.5	0.010211	0.310008	0.665513	6	S(1): 41.3; T(4): 41.3; T(5): 34.0; T(12): 34.0; S(21): 26.1; Y(29): 23.1	Low	Medium
AT1G24510.1	TCP-1/cpn60 chaperonin family protein	AFAEALDSVPMALAENSGLQPIETLSAVK	3052.48	0.005996	0.188734	7.65565	1	S(8): 16.4; S(17): 16.4; T(24): 50.7; S(26): 16.4		High
AT1G37130.1	nitrate reductase 2	SDSPKAHQNQTTNQTVFLKPAK	2520.22	0	3.04182e-05	25.4637	3	S(1): 11.9; S(3): 11.9; T(11): 11.9; T(12): 52.2; T(15): 11.9	High
AT1G37130.1	nitrate reductase 2	VHDDDEDVSSEDENETHNSNAVYYK	2991.14	0	1.95268e-09	82.9281	12	S(9): 86.8; S(10): 13.2; T(16): 0.0; S(19): 0.0; Y(23): 0.0; Y(24): 0.0		High			High
AT1G45207.2	Remorin family protein	GWSSERVPLR	1266.6	0.00075	0.0148995	37.7585	24	S(3): 50.0; S(4): 50.0	High	Low	High	Low	High	High
AT1G51910.1	Leucine-rich repeat protein kinase family protein	SGHVLSWENRMQIAMEAAQGLEYLHNGSRPPMVHR	4081.92	0.049239	0.813592	1.76486	5	S(1): 30.0; S(6): 30.0; Y(23): 20.0; S(28): 20.0		Medium	Low			Low
AT1G52380.1	NUP50 (Nucleoporin 50 kDa) protein	LAPAEAVVEDNQKASDIEEGDEVDSK	2838.25	0	1.78523e-06	76.5156	8	S(15): 100.0; S(25): 0.0		High			High	High
AT1G56220.4	Dormancy/auxin associated family protein	HHTFSFRPSSGNDQSEAGSAR	2354.99	0	7.29063e-05	35.5315	16	T(3): 13.7; S(5): 57.9; S(9): 13.7; S(10): 13.7; S(15): 1.1; S(19): 0.1	High	High			High	High
AT1G56220.4	Dormancy/auxin associated family protein	KHHTFSFRPSSGNDQSEAGSAR	2483.08	0	2.0249e-05	19.9446	16	T(4): 54.5; S(6): 19.8; S(10): 8.1; S(11): 8.1; S(16): 8.1; S(20): 1.2	High	High			High	High
AT1G62290.1	Saposin-like aspartyl protease family protein	SYNNNLGGDSGDADIVPLKNYLDAQYYGEIAIGTPPQK	4310.87	0.013098	0.277507	1.56852	1	S(1): 29.8; Y(2): 29.8; S(10): 34.9; Y(21): 43.2; Y(26): 54.1; Y(27): 54.1; T(34): 54.1					Medium
AT1G64500.1	Glutaredoxin family protein	KSASFHTLDELEVR	1711.8	0.000372	0.00770678	68.6916	15	S(2): 49.9; S(4): 49.9; T(7): 0.1	High		High	High	High	High
AT1G70200.1	RNA-binding (RRM/RBD/RNP motifs) family protein	QFTGQSLAFGKVIKQIK	1973.05	0.02041	0.460705	39.544	7	T(3): 50.0; S(6): 50.0		Low	Low	Low	Low	Medium
AT1G70730.1;AT1G23190.1	Phosphoglucomutase/phosphomannomutase family protein	ATGAFILTASHNPGGPTEDFGIK	2381.11	0	0.00107478	52.6286	11	T(2): 0.4; T(8): 86.4; S(10): 13.2; T(17): 0.0	High	High			High	High
AT1G73610.1	GDSL-like Lipase/Acylhydrolase superfamily protein	SYETIAPQIIENIKAK	1977.93	0.017056	0.387084	30.0857	18	S(1): 50.3; Y(2): 50.3; T(4): 99.3	Medium	Medium	Low	Low	Low	Low
AT1G74040.1	2-isopropylmalate synthase 1	ESSILKSPNLSSPSFGVPSIPALSSSSTSPFSSLHLR	4120.83	0.04948	0.815127		1	Too many isoforms		Medium
AT1G74920.1;AT3G48170.1	aldehyde dehydrogenase 10A8 / 9	SPLIVFDDVDLDK	1555.73	0.009502	0.258415	69.9184	2	S(1): 100.0	High
AT1G79420.1	unknown protein	GQDLRLLLGVLGCPLAPISVVVSDLFPDDPLLGSFQIK	4142.18	0.007277	0.176545	2.40884	1	S(19): 28.9; S(23): 42.2; S(34): 28.9			High
AT1G80380.3	P-loop containing nucleoside triphosphate hydrolases superfamily protein	GNAGSHDLKLSVETLEALSKLTK	2491.28	0.043032	0.788797	35.5102	1	S(5): 0.2; S(11): 0.1; T(14): 0.2; S(19): 9.4; T(22): 90.1			Medium
AT2G17410.2	ARID/BRIGHT DNA-binding domain-containing protein	HSEENQSPHHHANNVMEQDQAAEER	3004.19	0	0.000111394	60.1132	9	S(2): 97.1; S(7): 2.9	High	High
AT2G20790.3	clathrin adaptor complexes medium subunit family protein	AKPVAAPVASSNPSGAAITGATASDAPKAGSR	3038.44	0.005145	0.152847	4.77613	18	S(10): 23.3; S(11): 23.3; S(14): 30.2; T(19): 23.9; T(22): 23.9; S(24): 22.9; S(31): 52.5	Low	Low	Low
AT2G22400.1	S-adenosyl-L-methionine-dependent methyltransferases superfamily protein	EIRKNQTLER	1366.69	0.02499	0.523127	37.7585	1	T(7): 100.0	Medium
AT2G24270.2	aldehyde dehydrogenase 11A3	AGTGLFAEILDGEVYK	1762.82	0.000503	0.0115286	38.1569	3	T(3): 100.0; Y(15): 0.0	High	Medium		Low
AT2G24520.1	H(+)-ATPase 5	LGMGTNMYPSSALLGQVKDSSLGALPVDELIEK	3513.72	0.046113	0.748056	5.98523	2	T(5): 11.2; Y(8): 11.2; S(10): 27.6; S(11): 27.6; S(20): 11.2; S(21): 11.2	Medium
AT2G41110.1	calmodulin 2	ADQLTDDQISEFK	1589.66	0.019757	0.513722	49.8516	5	T(5): 100.0; S(10): 0.0	Low	Medium			Medium	Low
AT2G43160.3	ENTH/VHS family protein	KFSEQNIGAPPSYEEAVSDSR	2391.05	0	4.91943e-05	105.765	5	S(3): 100.0; S(12): 0.0; Y(13): 0.0; S(18): 0.0; S(20): 0.0		High			High
AT2G45290.1	Transketolase	TPGHPENFETPGVEATTGPLGQGIANAVGLALAEK	3523.73	0	0.00127526	5.94472	8	T(1): 29.4; T(10): 11.9; T(16): 29.4; T(17): 29.4	High	High
AT2G47390.1	Prolyl oligopeptidase family protein	KPLVPSGPKTLSNETKTVVQVR	2458.33	0.005144	0.100473	21.9061	1	S(6): 58.6; T(10): 18.9; S(12): 18.9; T(15): 2.9; T(17): 0.8			High
AT2G48160.1	Tudor/PWWP/MBT domain-containing protein	SAEEGTLGSAENTTLMPQVIEIPTATSLTQMNSDPSHGR	4150.91	0.014702	0.406737	10.9249	2	S(1): 3.2; T(6): 3.3; S(9): 3.6; T(13): 4.3; T(14): 3.6; T(24): 5.5; T(26): 5.5; S(27): 5.5; T(29): 5.5; S(33): 20.7; S(36): 39.1		Medium
AT3G01120.1	Pyridoxal phosphate (PLP)-dependent transferases superfamily protein	ALALGADLVVHSATK	1625.76	0.027871	0.562781	11.3327	2	S(12): 100.0; T(14): 100.0	Medium			Low
AT3G01280.1	voltage dependent anion channel 1	EDLIASLTVNDKGDLLNASYYHIVNPLFNTAVGAEVSHK	4468.05	0.023357	0.562417	0.595217	3	S(6): 44.2; T(8): 42.5; S(19): 42.2; Y(20): 42.2; Y(21): 42.2; T(30): 44.7; S(37): 42.2		Medium
AT3G05900.1	neurofilament protein-related	HVVDEPANEEKPSESSAALSPEK	2530.14	0	9.25173e-07	81.6252	4	S(13): 0.1; S(15): 0.1; S(16): 0.1; S(20): 99.7		High
AT3G09840.1	cell division cycle 48	TVFIIGATNRPDIIDSALLRPGRLDQLIYIPLPDEDSR	4583.18	0.016937	0.459422	1.57665	3	T(1): 81.0; T(8): 72.3; S(16): 81.0; Y(29): 81.0; S(37): 84.9		Low
AT3G12580.1	heat shock protein 70	VQDLLLLDVTPLSLGLETAGGVMTVLIPRNTTIPTKK	4157.15	0.028558	0.631422	1.70735	1	T(10): 49.9; S(13): 49.9; T(18): 46.5; T(24): 38.4; T(31): 38.4; T(32): 38.4; T(35): 38.4		Medium
AT3G15040.1	Protein of unknown function, DUF584	SLAQSSLLSCSVLEGAGR	1914.9	0	3.1532e-06	100.507	10	S(1): 0.0; S(5): 0.0; S(6): 0.0; S(9): 0.0; S(11): 100.0					High	High
AT3G15040.1	Protein of unknown function, DUF584	LPFSASFVGGGKYPQSAPVQVPLVSSAMMNR	3302.6	0.00103	0.0274955	28.2685	5	S(4): 2.7; S(6): 5.6; Y(13): 12.5; S(16): 78.5; S(25): 0.3; S(26): 0.3					High
AT3G20970.1	NFU domain protein 4	GIARLVTSLSR	1252.67	0.007601	0.232023	36.3313	6	T(7): 8.0; S(8): 84.1; S(10): 8.0	Low	High
AT3G25070.1	RPM1 interacting protein 4	SRPKPTNLRADESPEKVTVVPK	2528.32	0.001472	0.0598306	23.4497	14	S(1): 0.3; T(6): 1.6; S(13): 10.5; T(18): 87.5		Low	High	High	High	Medium
AT3G25070.1	RPM1 interacting protein 4	ASQNNSYDNKSPLHKNSYDGTGK	2605.12	0.009553	0.205742	8.05899	2	S(2): 24.5; S(6): 24.5; Y(7): 24.5; S(11): 7.5; S(17): 7.5; Y(18): 7.5; T(21): 3.8						High
AT3G25860.1	2-oxoacid dehydrogenases acyltransferase family protein	VDIESVAGTGPFGR	1484.67	0.027548	0.554734	11.8989	1	S(5): 15.9; T(9): 84.1	Medium
AT3G28710.1	ATPase, V0/A0 complex, subunit C/D	AVNITINSIGTELTR	1681.86	0.015828	0.315547	36.7594	30	T(5): 0.0; S(8): 77.3; T(11): 11.3; T(14): 11.3	Low	Low	Low	Low	Medium	Low
AT3G42850.1	Mevalonate/galactokinase family protein	HAEARHHSRDTPILEIVSFGSELSNR	3038.46	0.014648	0.405529	2.56829	133	S(8): 27.3; T(11): 27.3; S(18): 15.1; S(21): 15.1; S(24): 15.1	Medium	Medium	Medium	Low	Low	Low
AT3G48750.1	cell division control 2	TNSLKLADFGLARAFGIPVR	2226.18	0.045148	0.610872	16.4239	1	T(1): 50.0; S(3): 50.0					Medium
AT3G48770.1	DNA binding;ATP binding	LGHGNNSPGIYAFLPTEMVTNFPFIIQADFILASSR	4017.97	0.030701	0.646878	9.90632	1	S(7): 14.5; Y(11): 56.7; T(16): 14.5; T(20): 4.8; S(34): 4.8; S(35): 4.8		Medium
AT3G54280.1	DNA binding;ATP binding;nucleic acid binding;binding;helicases;ATP binding;DNA binding;helicases	GTLEEKVMSLQK	1442.69	0.001053	0.0180491	67.3439	6	T(2): 0.0; S(9): 100.0		Medium	High	Medium	Medium	Low
AT3G57410.1	villin 3	AEALAALTSAFNSSPSSKSPPRR	2425.18	0	2.06252e-06	32.9933	27	T(8): 0.4; S(9): 3.5; S(13): 12.2; S(14): 47.4; S(16): 12.2; S(17): 12.2; S(19): 12.2			High	High	High	High
AT3G57410.1	villin 3	AEALAALTSAFNSSPSSKSPPR	2269.08	0	1.86407e-07	57.1652	14	T(8): 1.5; S(9): 1.5; S(13): 1.5; S(14): 1.5; S(16): 10.0; S(17): 73.8; S(19): 10.0					High	High
AT4G00810.1	60S acidic ribosomal protein family	NVTDLIMNVGAGGGGGGAPVSAAAPAAAGGAAAAAPAKEEK	3597.73	0.003319	0.0936655	14.8691	2	T(3): 4.4; S(21): 95.6					High
AT4G11740.1	Ubiquitin-like superfamily protein	AQPRPPSPSLTAQR	1585.78	0.010558	0.233691	48.7919	3	S(7): 8.4; S(9): 90.6; T(11): 1.0					Medium
AT4G12420.1	Cupredoxin superfamily protein	RPLTGPAKVATSIINGTYR	2175.07	0.002939	0.083693	36.1086	3	T(4): 99.1; T(11): 7.4; S(12): 91.8; T(17): 0.9; Y(18): 0.9	Low	High
AT4G13350.1	NSP (nuclear shuttle protein)-interacting GTPase	DLGSASPPVARPVR	1501.75	0.027763	0.601336	38.471	4	S(4): 10.2; S(6): 89.8					Low	Medium
AT4G15545.1	unknown protein	LTPPGSPPILSASGTPK	1779.83	0	0.0015179	72.3185	3	T(2): 100.0; S(6): 99.9; S(11): 0.1; S(13): 0.0; T(15): 0.0		High
AT4G15545.1	unknown protein	HSSIQSQQASEAIEPAATDNENDAPKPSLSASLPLVSQTTTPR	4554.15	0	0.00011821	13.3534	11	S(2): 2.0; S(3): 2.0; S(6): 2.0; S(10): 2.0; T(18): 2.0; S(28): 2.0; S(30): 2.0; S(32): 2.0; S(37): 13.3; T(39): 13.3; T(40): 13.3; T(41): 43.8		High
AT4G15545.1	unknown protein	LTPPGSPPILSASGTPK	1699.86	0.000865	0.0147585	49.7341	12	T(2): 0.1; S(6): 98.0; S(11): 0.6; S(13): 0.6; T(15): 0.6	Medium	High			Low	Low
AT4G18810.1	NAD(P)-binding Rossmann-fold superfamily protein	MEVSSSLKLSSSLSPSIIKLQGSSSSIDIK	3268.6	0.009184	0.275589	2.16374	12	S(4): 17.3; S(5): 17.3; S(6): 17.3; S(10): 17.3; S(11): 17.3; S(12): 17.3; S(14): 17.3; S(16): 17.3; S(23): 15.4; S(24): 15.4; S(25): 15.4; S(26): 15.4	Low		High
AT4G25890.1;AT5G57290.3	60S acidic ribosomal protein family	KKEESEEEEGDFGFDLFG	2171.87	0	1.91048e-05	105.154	6	S(5): 100.0		High			High	High
AT4G26780.1	Co-chaperone GrpE family protein	ASSVVKESFSKLDTSEDSAGAAPLLK	2797.3	0.035369	0.705773	17.1613	2	S(2): 17.4; S(3): 17.4; S(8): 66.9; S(10): 66.9; T(14): 10.4; S(15): 10.4; S(18): 10.4	Low	Medium
AT4G27320.1	Adenine nucleotide alpha hydrolases-like superfamily protein	IHHPSSPRHSHHHSSSTPSAATPTPTAGAR	3186.47	0.001023	0.0270912	11.2669	32	S(5): 9.2; S(6): 19.1; S(10): 9.2; S(14): 9.2; S(15): 9.2; S(16): 9.2; T(17): 9.2; S(19): 9.2; T(22): 9.2; T(24): 5.0; T(26): 2.2	Low	High	Low	Low
AT4G27320.1	Adenine nucleotide alpha hydrolases-like superfamily protein	HSHHHSSSTPSAATPTPTAGAR	2274.99	0.011442	0.343055	8.38003	40	S(2): 8.8; S(6): 8.8; S(7): 8.8; S(8): 8.8; T(9): 8.8; S(11): 8.8; T(14): 8.8; T(16): 29.8; T(18): 8.8	Low	Medium	Medium	Low	Medium	Low
AT4G27430.1	COP1-interacting protein 7	HYSEDVGEVQASQEKPVSPK	2294.02	0	0.000180173	98.8012	6	Y(2): 0.0; S(3): 0.0; S(12): 0.0; S(18): 100.0	High	High		High
AT4G28910.2	novel interactor of JAZ	SDSGQQPPQNFFNDLSKAPTTEAEASTKPLWVEDESR	4266.85	0.044161	0.731434	1.49471e-14	1	S(1): 25.0; S(3): 25.0; S(16): 25.0; T(20): 25.0; T(21): 25.0; S(26): 25.0; T(27): 25.0; S(36): 25.0	Medium
AT4G30630.1	unknown protein	LSESGGLEVPRKPSGERK	2006.01	0.031388	0.618337	31.8301	1	S(2): 0.1; S(4): 0.2; S(14): 99.7	Medium
AT4G33090.1	aminopeptidase M1	LNPDLIACTFTGTVAIDLDIVADTR	2784.35	0.030803	0.650107	18.9062	4	T(9): 57.1; T(11): 20.8; T(13): 20.8; T(24): 1.4	Low	Medium
AT4G34740.1	GLN phosphoribosyl pyrophosphate amidotransferase 2	MAATSSISSSLSLNAKPNKLSNNNNNNKPHRFLR	3965.82	0.049336	0.814605	5.45169	5	T(4): 49.2; S(5): 49.2; S(6): 49.2; S(8): 30.5; S(9): 30.5; S(10): 30.5; S(12): 30.5; S(21): 30.5	Low	Medium
AT4G38710.1	glycine-rich protein	TLPVAVVEVVKPESPVLVIVEKPK	2649.51	0	0.000476253	22.0311	1	T(1): 3.6; S(14): 96.4						High
AT5G01220.1	sulfoquinovosyldiacylglycerol 2	FKPDIIHASSPGVMVFGALAIAK	2449.27	0.011226	0.331174	7.79743	2	S(9): 23.7; S(10): 76.3		Medium
AT5G04430.1	binding to TOMV RNA 1L (long form)	SPEPHDSSEADSAEKPTHIR	2269.96	0	2.26222e-06	32.9385	37	S(1): 95.2; S(7): 2.2; S(8): 2.2; S(12): 0.4; T(17): 0.1	High	High	High	High	High	High
AT5G04430.1	binding to TOMV RNA 1L (long form)	RSPEPHDSSEADSAEKPTHIR	2426.07	0	5.61157e-05	58.1882	105	S(2): 89.4; S(8): 5.3; S(9): 5.3; S(13): 0.0; T(18): 0.0	High	High	High	High	High	High
AT5G04430.1	binding to TOMV RNA 1L (long form)	RSPEPHDSSEADSAEKPTHIR	2506.03	0	9.55055e-06	43.9403	37	S(2): 95.5; S(8): 52.2; S(9): 52.2; S(13): 0.1; T(18): 0.0	High	High	High		High	High
AT5G04430.1	binding to TOMV RNA 1L (long form)	SPEPHDSSEADSAEKPTHIR	2349.94	0	0.00771391	16.4239	18	S(1): 58.2; S(7): 58.2; S(8): 62.7; S(12): 13.1; T(17): 7.9		High		High	High	High
AT5G04740.1	ACT domain-containing protein	VMADVNIDVESAEIDTEGLVAK	2398.11	0.002081	0.0675241	10.0533	4	S(11): 15.7; T(16): 84.3	High		Medium		Low	Medium
AT5G09620.1	Octicosapeptide/Phox/Bem1p family protein	LFLFPSSPISGGFGSEGSTK	2094.98	0.012299	0.256954	34.1354	6	S(6): 1.0; S(7): 1.0; S(10): 96.5; S(15): 1.0; S(18): 0.3; T(19): 0.3						Medium
AT5G11670.1	NADP-malic enzyme 2	LLIDNVEELLPVVYTPTVGEACQKYGSIFR	3503.75	0.038765	0.736579	11.8003	3	Y(14): 47.3; T(15): 13.2; T(17): 13.2; Y(25): 13.2; S(27): 13.2		Medium
AT5G14740.2	carbonic anhydrase 2	GNESYEDAIEALKK	1646.72	0	0.00682914	77.5126	10	S(4): 1.1; Y(5): 98.9	High	High		High	High	High
AT5G16880.1	Target of Myb protein 1	YEEMNKPSAPLTSHEPAMIPVAEEPDDSPIHGR	3724.66	0	1.46417e-05	22.9076	4	Y(1): 0.5; S(8): 0.7; T(12): 0.9; S(13): 1.2; S(28): 96.7	High	High
AT5G20700.1	Protein of unknown function (DUF581)	ISELLVGVNRSTAAPFFDVLMTSPKSPLDFK	3539.72	0.038956	0.75286	6.03099	3	S(2): 42.6; S(11): 42.6; T(12): 42.6; T(22): 24.1; S(23): 24.1; S(26): 24.1						Medium
AT5G20935.1	unknown protein	TAASMPCLRANSGLVKPGDVGR	2337.11	0.005144	0.0990051	8.38003	2	T(1): 43.6; S(4): 43.6; S(12): 12.9			High
AT5G35630.1	glutamine synthetase 2	SKSRTIEKPVEDPSELPK	2200.03	0.04041	0.750293	3.74558	2	S(1): 50.0; S(3): 50.0; T(5): 50.0; S(14): 50.0		Medium		Low
AT5G36210.1	alpha/beta-Hydrolases superfamily protein	SNPITTIVEVNLSGETLEEPK	2350.15	0.00135	0.0504367	16.561	2	S(1): 1.9; T(5): 1.9; T(6): 1.9; S(13): 11.7; T(16): 82.5					High
AT5G42020.1	Heat shock protein 70 (Hsp 70) family protein	ARSFGANSTVVLAIIFFGCLFAFSTAK	3055.45	0.031338	0.655773	0	18	S(3): 40.0; S(8): 40.0; T(9): 40.0; S(24): 40.0; T(25): 40.0	Low	Low	Medium
AT5G43830.1	Aluminium induced protein with YGL and LRDR motifs	VDSSGDVCGATFKVDAETKR	2221.97	0	0.000264756	35.4581	6	S(3): 3.6; S(4): 3.6; T(11): 92.8; T(18): 0.0					High	High
AT5G52310.1	low-temperature-responsive protein 78 (LTI78) / desiccation-responsive protein 29A (RD29A)	DVPIHHPLSELSDR	1694.79	0	0.000599592	140.436	12	S(9): 0.0; S(12): 100.0	High	High			High	High
AT5G52310.1	low-temperature-responsive protein 78 (LTI78) / desiccation-responsive protein 29A (RD29A)	SPHSVEESPQSLGSTVVPVQK	2272.08	0	1.6889e-05	144.715	26	S(1): 6.1; S(4): 93.9; S(8): 0.0; S(11): 0.0; S(14): 0.0; T(15): 0.0	High	High			High	High
AT5G52310.1	low-temperature-responsive protein 78 (LTI78) / desiccation-responsive protein 29A (RD29A)	GWFGGGATDEVKPESPHSVEEAPK	2591.13	0	8.12731e-07	71.7917	12	T(8): 0.0; S(15): 11.3; S(18): 88.7	High	High			High	High
AT5G52310.1	low-temperature-responsive protein 78 (LTI78) / desiccation-responsive protein 29A (RD29A)	IKGWFGGGATDEVKPESPHSVEEAPK	2832.32	0	0.000150004	50.1271	19	T(10): 0.3; S(17): 98.8; S(20): 1.0	High	High			High	High
AT5G52310.1	low-temperature-responsive protein 78 (LTI78) / desiccation-responsive protein 29A (RD29A)	MDQTEEPPLNTHQQHPEEVEHHENGATK	3342.39	0	2.13445e-05	35.8896	16	T(4): 96.1; T(11): 3.8; T(27): 0.0	High	High			High	High
AT5G52310.1	low-temperature-responsive protein 78 (LTI78) / desiccation-responsive protein 29A (RD29A)	AASEEGEAVEEEVK	1556.63	0	8.73928e-08	142.64	3	S(3): 100.0		High			High	High
AT5G52310.1	low-temperature-responsive protein 78 (LTI78) / desiccation-responsive protein 29A (RD29A)	NSPMGFGSESGAELEK	1719.69	0	5.82087e-06	132.928	6	S(2): 0.0; S(8): 99.6; S(10): 0.4		High
AT5G52310.1	low-temperature-responsive protein 78 (LTI78) / desiccation-responsive protein 29A (RD29A)	TETGMDTNSPSRSHEFDLK	2231.92	0	1.29694e-05	45.8263	5	T(1): 0.5; T(3): 2.5; T(7): 83.0; S(9): 13.4; S(11): 0.5; S(13): 0.0					High	High
AT5G52310.1	low-temperature-responsive protein 78 (LTI78) / desiccation-responsive protein 29A (RD29A)	SSGWFGGGATEEVKPKSPHSVEESPQSLGSTVVPVQK	3889.87	0.000644	0.00955201	22.188	22	S(1): 13.8; S(2): 13.8; T(10): 13.8; S(17): 13.8; S(20): 13.8; S(24): 13.8; S(27): 13.8; S(30): 2.9; T(31): 0.8					High	High
AT5G52310.1	low-temperature-responsive protein 78 (LTI78) / desiccation-responsive protein 29A (RD29A)	GRPGYGEASEEDKFPAR	1945.84	0.001813	0.0521044	49.7341	1	Y(5): 0.6; S(9): 99.4		High
AT5G52310.1	low-temperature-responsive protein 78 (LTI78) / desiccation-responsive protein 29A (RD29A)	RDVPIHHPLSELSDR	1850.89	0.00397	0.122544	20.0206	8	S(10): 50.0; S(13): 50.0	High	Medium			High	High
AT5G53620.1	unknown protein	LDSHSQNQKPEELNGQVSPDEHSGAK	2911.27	9.8e-05	0.000601327	12.3768	3	S(3): 6.4; S(5): 9.4; S(18): 68.2; S(23): 16.0	High	High
AT5G55160.1	small ubiquitin-like modifier 2	SATPEEDKKPDQGAHINLK	2237.97	0.000487	0.00798287	30.6119	2	S(1): 100.0; T(3): 100.0		High			High
AT5G55230.1	microtubule-associated proteins 65-1	EEAASSPVSGAADHQVPASP	1986.84	0	6.2791e-07	112.83	1	S(5): 0.0; S(6): 0.0; S(9): 0.0; S(19): 100.0						High
AT5G61210.1	soluble N-ethylmaleimide-sensitive factor adaptor protein 33	SSKPNPFDSDDESDNKHTLNPSKR	2795.22	0	2.94277e-11	42.6978	17	S(1): 0.9; S(2): 0.9; S(9): 97.1; S(13): 0.9; T(18): 0.2; S(22): 0.0	High	High	High	High	High	High
AT5G61210.1	soluble N-ethylmaleimide-sensitive factor adaptor protein 33	SSKPNPFDSDDESDNKHTLNPSK	2639.11	0.011263	0.228431	6.5595	2	S(1): 10.8; S(2): 10.8; S(9): 58.9; S(13): 10.8; T(18): 5.8; S(22): 2.8						Medium
AT5G61780.1	TUDOR-SN protein 2	VVVTEVLGGGRFYVQTVGDQKVASIQNQLAALSLK	3927.94	0.030953	0.652373	10.1908	1	T(4): 77.3; Y(13): 46.0; T(16): 46.0; S(24): 49.7; S(33): 81.0		Medium
AT5G64090.1	unknown protein	ASHDLNPQAILATR	1586.77	0.035	0.65823	56.9882	1	S(2): 0.0; T(13): 100.0	Medium
AT5G66130.1	RADIATION SENSITIVE 17	VVDFLHENVLDFVSDGAIEDAWCVSSYLADADLLLADIR	4446.08	0.009502	0.258493	6.45876	17	S(14): 50.9; S(25): 16.4; S(26): 16.4; Y(27): 16.4	High	Medium

## Sheet: PAPE (40% AS+MOAC)
Table S2-d: Identified phosphopeptides in PAPE (40%AS+MOAC) fraction
Color codes:	blue=novel phosphopeptides (from proteins not annotated as phosphoproteins)
	red=novel phosphopeptides (in known phosphoproteins)
	white=known phosphopeptides
Protein code	Description	Sequence	MH+ [Da]	q-Value	PEP	pRS Score	# PSMs	pRS Site Probabilities	Replicate 1	Replicate 2	Replicate 3	Replicate 4	Replicate 5	Replicate 6	(i.e 3 biological & 2 technical replicates)
AT1G01100.1;AT5G47700.1	60S acidic ribosomal protein family	KKDEPAEESDGDLGFGLFD	2148.9	0	0.000337345	200.255	29	S(9): 100.0		High	High	High	High	High
AT1G01320.2	Tetratricopeptide repeat (TPR)-like superfamily protein	NSVVSLGKSPSYKEVALAPPGSIAK	2579.35	0.000356	0.00370611	29.9437	5	S(2): 0.2; S(5): 6.0; S(9): 6.0; S(11): 43.3; Y(12): 43.3; S(22): 1.1		High
AT1G01320.2	Tetratricopeptide repeat (TPR)-like superfamily protein	STQPSSGNAKTAGETSEEDGLKTDASSVEPPTLSSTVQSEAYHTK	4690.11	0.000811	0.0450468	40.5287	10	S(1): 2.7; T(2): 2.7; S(5): 2.7; S(6): 2.7; T(11): 2.7; T(15): 17.1; S(16): 17.1; T(23): 17.1; S(26): 17.1; S(27): 17.1; T(32): 0.5; S(34): 0.1; S(35): 0.1; T(36): 0.1; S(39): 0.0; Y(42): 0.0; T(44): 0.0				High
AT1G04080.1	Tetratricopeptide repeat (TPR)-like superfamily protein	SQVDGSTEQSPKLESASSTEPEELKK	2871.31	0	3.68495e-07	41.4491	12	S(1): 0.2; S(6): 2.5; T(7): 7.4; S(10): 79.4; S(15): 7.4; S(17): 2.5; S(18): 0.4; T(19): 0.2	High	High
AT1G07110.1	fructose-2,6-bisphosphatase	SLSASGSFRNDSTPKAAQR	2059.95	0.000701	0.0151588	30.1817	10	S(1): 0.8; S(3): 5.9; S(5): 19.3; S(7): 71.1; S(12): 0.8; T(13): 2.1	High	High	High	High
AT1G16630.1	unknown protein	SNDSGESMASSASEYSIGSVSYGSFTTYEK	3927.98	0.00369	0.0882766		8	Too many isoforms	High
AT1G20620.1	catalase 3	MDPYKYRPSSAYNAPFYTTNGGAPVSNNISSLTIGER	4118.9	0.002241	0.0487397	46.8473	14	Y(4): 2.0; Y(6): 2.0; S(9): 15.6; S(10): 15.6; Y(12): 15.6; Y(17): 15.6; T(18): 15.6; T(19): 15.6; S(26): 2.0; S(30): 0.3; S(31): 0.1; T(33): 0.0	High			Low	Low	Low
AT1G21080.3	DNAJ heat shock N-terminal domain-containing protein	AELHKLNGNGQEHDHSSTSPKSDEASR	3011.32	0.00013	0.00116594	19.3135	55	S(16): 46.2; S(17): 16.5; T(18): 16.5; S(19): 16.5; S(22): 2.9; S(26): 1.4	High	High	High	High	Medium	Medium
AT1G21380.1	Target of Myb protein 1	SPEHALFTKPVYDQTEQLPPAPWETQEPR	3471.62	0	1.77592e-05	62.3737	28	S(1): 97.7; T(8): 1.1; Y(12): 1.1; T(15): 0.0; T(25): 0.0		High	High	High
AT1G37130.1	nitrate reductase 2	AHQNQTTNQTVFLKPAKVHDDDEDVSSEDENETHNSNAVYYK	4898.13	0	0.00127022	17.9105	86	T(6): 6.0; T(7): 6.0; T(10): 6.0; S(26): 15.4; S(27): 45.5; T(33): 15.4; S(36): 2.7; Y(40): 1.5; Y(41): 1.5	High	High	High	High	High	High
AT1G37130.1	nitrate reductase 2	SADAPPSLKKSVSTPFMNTTAK	2358.14	0	0.000381021	50.4449	22	S(1): 0.0; S(7): 0.0; S(11): 4.4; S(13): 75.6; T(14): 17.5; T(19): 1.2; T(20): 1.2	High	High	High	High
AT1G37130.1	nitrate reductase 2	VHDDDEDVSSEDENETHNSNAVYYK	2991.14	0	2.48433e-09	74.7417	24	S(9): 85.8; S(10): 14.2; T(16): 0.0; S(19): 0.0; Y(23): 0.0; Y(24): 0.0		High	High	High	High	High
AT1G37130.1	nitrate reductase 2	SYKPPVPGRSDSPK	1594.76	0.005244	0.182054	29.1302	5	S(1): 0.1; Y(2): 0.1; S(10): 17.8; S(12): 81.9			Low	High
AT1G37130.1	nitrate reductase 2	KSVSTPFMNTTAK	1491.69	0.008768	0.191449	49.335	3	S(2): 0.5; S(4): 86.1; T(5): 13.3; T(10): 0.0; T(11): 0.0	High
AT1G37130.1	nitrate reductase 2	SVSTPFMNTTAK	1363.59	0.012817	0.269479	34.8793	7	S(1): 4.3; S(3): 91.2; T(4): 4.3; T(9): 0.0; T(10): 0.0	Medium	Medium	Low	Low
AT1G43690.1	ubiquitin interaction motif-containing protein	RSKPIEEEETGSGSQSGGESPEAK	2556.1	0.000425	0.00501974	59.0582	6	S(2): 0.0; T(10): 0.0; S(12): 0.0; S(14): 0.3; S(16): 4.6; S(20): 95.1				High
AT1G49240.1	actin 8	ADADDIQPIVCDNGTGMVKAGFAGDDAPR	3056.33	0.008319	0.178433	35.6145	3	T(15): 100.0	High			Low		Low
AT1G49880.1	Erv1/Alr family protein	NTPPSSQSTIQNPIISLDSSPPIATNSSSLQK	3389.66	0.016405	0.363845	0	2	T(2): 8.3; S(5): 8.3; S(6): 8.3; S(8): 8.3; T(9): 8.3; S(16): 8.3; S(19): 8.3; S(20): 8.3; T(25): 8.3; S(27): 8.3; S(28): 8.3; S(29): 8.3		Medium
AT1G64500.1	Glutaredoxin family protein	KSASFHTLDELEVR	1711.8	0	0.00017799	38.0972	18	S(2): 14.9; S(4): 70.2; T(7): 14.9	High	High	High	High	High	High
AT1G64790.1	ILITYHIA	SPIVSAAAFENLVK	1525.76	0.017784	0.329338	47.7687	5	S(1): 10.3; S(5): 89.7		Medium	Medium	Low	Low	Medium
AT1G65010.1	Plant protein of unknown function (DUF827)	SEVSPERETELDSVEEEVDSK	2473.05	0.006286	0.188001	59.1293	6	S(1): 0.3; S(4): 1.0; T(9): 98.7; S(13): 0.1; S(20): 0.0			High	Medium
AT1G70200.1	RNA-binding (RRM/RBD/RNP motifs) family protein	VAFKEVSGVLSITPAVSGNKK	2291.14	0.038795	0.458903	12.3799	1	S(7): 73.0; S(11): 73.0; T(13): 27.0; S(17): 27.0						Medium
AT1G73270.1	serine carboxypeptidase-like 6	SERNPKEDPLLLWLTGGPGCSAISGLLYENGPLTMK	4073.92	0.008647	0.190612	7.09022	5	S(1): 26.1; T(15): 44.6; S(21): 27.0; S(24): 25.6; Y(28): 27.8; T(34): 48.9					High
AT1G74040.1	2-isopropylmalate synthase 1	ESSILKSPNLSSPSFGVPSIPALSSSSTSPFSSLHLR	3880.94	0.029717	0.570314	1.70735	3	S(2): 7.1; S(3): 7.1; S(7): 7.1; S(11): 7.1; S(12): 7.1; S(14): 7.1; S(19): 11.7; S(24): 7.1; S(25): 7.1; S(26): 5.3; S(27): 5.3; T(28): 5.3; S(29): 5.3; S(32): 5.3; S(33): 5.3		Medium
AT1G76850.1	exocyst complex component sec5	LITESSGSPSKAEKVDNTLR	2212.08	0.003302	0.0739667	27.3094	2	T(3): 1.6; S(5): 4.9; S(6): 4.9; S(8): 70.8; S(10): 17.2; T(18): 0.6	High
AT2G01690.1	ARM repeat superfamily protein	VVARETNEELRSIHVEPSDGFDVGAILSVAR	3525.67	0.025437	0.417849	0	2	T(6): 35.1; S(12): 35.1; S(18): 62.8; S(28): 67.0	Medium
AT2G07170.1	ARM repeat superfamily protein	ESSELFSTSDFKVK	1683.76	0.020976	0.440559	12.8579	3	S(2): 5.0; S(3): 5.0; S(7): 30.0; T(8): 30.0; S(9): 30.0		Medium
AT2G07360.1	SH3 domain-containing protein	SGGSKYQSTYEGYGSPIREEPPPPYSYSEPQSR	3760.64	0	0.000244446	50.285	62	S(1): 0.0; S(4): 0.0; Y(6): 0.1; S(8): 0.7; T(9): 3.0; Y(10): 13.6; Y(13): 13.6; S(15): 68.9; Y(25): 0.1; S(26): 0.1; Y(27): 0.0; S(28): 0.0; S(32): 0.0		High	High	High	High	High
AT2G07360.1	SH3 domain-containing protein	YVYYYLARILSDTGMTPGGGIPTPNWDALADIDAGGGVTR	4536.93	0.032165	0.421632	1.08487e-13	12	Y(1): 44.4; Y(3): 44.4; Y(4): 44.4; Y(5): 44.4; S(11): 44.4; T(13): 44.4; T(16): 44.4; T(23): 44.4; T(39): 44.4		Low	Low	Low
AT2G17410.2	ARID/BRIGHT DNA-binding domain-containing protein	LSEDTGSPHHHADILMVQEK	2324.03	0.00013	0.00123792	22.0363	9	S(2): 12.8; T(5): 74.5; S(7): 12.8	Medium	High
AT2G18110.1	Translation elongation factor EF1B/ribosomal protein S6 family protein	WFNHIDALLRISGVSAEGSGVIVEGSSPITEEAVATPPAADSK	4698.11	0.032584	0.482112	4.09321	7	S(12): 52.2; S(15): 52.2; S(19): 52.2; S(26): 52.2; S(27): 52.2; T(30): 52.2; T(36): 52.2; S(42): 34.4					Medium
AT2G26620.1	Pectin lyase-like superfamily protein	DITSLNSKMGHFNFFFVHHFNITGVTITAPSDSPNTDGIK	4487.15	0.044347	0.580566	5.96668	9	T(3): 12.0; S(4): 12.0; S(7): 12.0; T(23): 18.8; T(26): 12.0; T(28): 12.0; S(31): 8.4; S(33): 6.5; T(36): 6.5	Medium
AT2G27710.1	60S acidic ribosomal protein family	LASVPSGGGGGVAVASATSGGGGGGGASAAESKK	2796.31	0.025881	0.425045	8.91405	2	S(3): 73.7; S(6): 14.0; S(16): 2.9; T(18): 2.9; S(19): 2.9; S(28): 1.8; S(32): 1.8	Medium
AT2G27720.1;AT2G27710.1;AT3G44590.2	60S acidic ribosomal protein family	KEEKEESDDDMGFSLFE	2114.81	0	1.90187e-06	135.972	4	S(7): 100.0; S(14): 0.0		High
AT2G35050.1	Protein kinase superfamily protein with octicosapeptide/Phox/Bem1p domain	SLRKSEDHVENNLSAK	1906.9	0	0.000123999	42.8351	8	S(1): 14.6; S(5): 85.4; S(14): 0.1	High	High		Medium
AT2G38390.1	Peroxidase superfamily protein	TAFADVGLNRPSDLVALSGGHTFGKAQCQFVTPR	3697.77	0.015168	0.310235	2.50511	2	T(1): 15.4; S(12): 26.4; S(18): 21.0; T(22): 21.0; T(32): 16.2						Medium
AT3G02830.1	zinc finger protein 1	NKAGIAGRVSLNMLGYPLR	2110.1	0.016331	0.30972	46.6488	1	S(10): 100.0; Y(16): 0.0				Medium
AT3G11050.1	ferritin 2	ASPALSLLSSGYTGGGNLFPPSR	2329.11	0.018067	0.396656	19.3146	1	S(2): 1.0; S(6): 1.9; S(9): 5.6; S(10): 5.6; Y(12): 5.6; T(13): 5.6; S(22): 74.8		Medium
AT3G11130.1;AT3G08530.1	Clathrin, heavy chain	EYSGKVDELIK	1360.63	0.000811	0.0456193	48.7616	6	Y(2): 99.7; S(3): 0.3				High	Low	Low
AT3G18780.2	actin 2	AEADDIQPIVCDNGTGMVKAGFAGDDAPR	3070.32	0.00444	0.0938805	45.0416	2	T(15): 100.0		High	Low
AT3G19420.1	PTEN 2	ETENPDKDDVFSDNEGDSTGPTKTTSSASSQTPEAK	3852.6	0	0.00101851	32.5447	61	T(2): 2.1; S(12): 81.0; S(18): 4.6; T(19): 4.6; T(22): 4.6; T(24): 1.0; T(25): 1.0; S(26): 0.5; S(27): 0.3; S(29): 0.1; S(30): 0.1; T(32): 0.1		High	High	High
AT3G43300.2	HOPM interactor 7	SSVAEVTVPSSPYKHEDPTEPDSR	2694.2	0	2.40153e-06	40.4217	35	S(1): 3.3; S(2): 3.3; T(7): 30.0; S(10): 30.0; S(11): 30.0; Y(13): 3.3; T(19): 0.1; S(23): 0.0		High	High	High	High	High
AT3G43790.1	zinc induced facilitator-like 2	KPIILIGTFSVIIFNTLFGLSTSFWLAISVR	3613.92	0.03569	0.648423	6.03099	15	T(8): 15.1; S(10): 15.1; T(16): 32.2; S(21): 34.4; T(22): 34.4; S(23): 34.4; S(29): 34.4		Medium	Medium	Low	Low
AT3G45190.1	SIT4 phosphatase-associated family protein	SPPVPSLFGKDVEFVGVEPEGTER	2652.25	0.002772	0.0991954	67.6899	4	S(1): 90.3; S(6): 9.7; T(22): 0.0			High
AT3G46370.1	Leucine-rich repeat protein kinase family protein	IISLNLSSSGLTGNIATGIQNLTKLQK	3024.48	0.039744	0.543312	2.45851	1	S(3): 45.9; S(7): 45.9; S(8): 45.9; S(9): 45.9; T(12): 45.9; T(17): 35.2; T(23): 35.2					Medium
AT3G50370.1	unknown protein	QALDSSASGLNAMQKTVSGGSFENR	2635.19	0.008406	0.231651	2.86273	3	S(5): 16.7; S(6): 16.7; S(8): 16.7; T(16): 16.7; S(18): 16.7; S(21): 16.7		Low		Medium
AT3G55650.1	Pyruvate kinase family protein	TLGMVSLPLSPIESLAASVVSTAQSVFASAIVVLTK	3746.92	0.006935	0.149483	6.79437	3	T(1): 15.5; S(6): 15.6; S(10): 15.6; S(14): 15.8; S(18): 16.1; S(21): 19.6; T(22): 22.3; S(25): 22.3; S(29): 25.1; T(35): 32.1	High	Low
AT3G61140.1	26S proteasome, regulatory subunit Rpn7;Proteasome component (PCI) domain	NFLELVPDVRELINDFYSSR	2506.2	0.044275	0.498462	9.08402	1	Y(17): 65.0; S(18): 17.5; S(19): 17.5				Medium
AT3G62010.2	unknown protein	YDGAIMVIHETKDGQIFDLWENVDADSVQTPLEVYK	4218.94	0.019352	0.349079	5.10555	2	Y(1): 22.4; T(11): 22.4; S(27): 22.4; T(30): 22.4; Y(35): 10.2						Medium
AT3G62360.1	Carbohydrate-binding-like fold	GEIAIETSTLSAGSFVAGPLYDDIPYATEASKPGYHIKR	4205.07	0.030849	0.469946	3.0251	13	T(7): 17.9; S(8): 10.8; T(9): 10.8; S(11): 10.8; S(14): 10.8; Y(21): 10.8; Y(26): 7.5; T(28): 7.5; S(31): 7.5; Y(35): 5.5	Medium		Low	Low	Medium
AT4G01810.1	Sec23/Sec24 protein transport family protein	LANVASLGFGAIVSAGREISPGPQIIQRDPHR	3566.71	0.014033	0.273412	7.76536	1	S(6): 100.0; S(14): 100.0; S(20): 100.0	Medium
AT4G01985.1	unknown protein	KGGGGAGGGVGGGVGAGGGAGGSVGAGGGIGGGAGGAIGGGASGGVGGGGK	3587.69	0.015876	0.305933	0.17134	1	S(23): 49.0; S(43): 51.0				Medium
AT4G02510.1	translocon at the outer envelope membrane of chloroplasts 159	KVVEGDSAEEDENKLPVEDIVSSR	2724.26	0	0.000193086	88.5661	6	S(7): 100.0; S(22): 0.0; S(23): 0.0		High	High	High
AT4G10955.1	alpha/beta-Hydrolases superfamily protein	SVAGSLVQGIYVAER	1628.81	0.017624	0.393535	20.0332	1	S(1): 17.7; S(5): 77.2; Y(11): 5.1		Medium
AT4G11740.1	Ubiquitin-like superfamily protein	AQPRPPSPSLTAQR	1585.78	0.000425	0.0132163	88.478	21	S(7): 0.6; S(9): 98.8; T(11): 0.6	High	High	High	High	High	High
AT4G15545.1	unknown protein	LTPPGSPPILSASGTPK	1699.86	0.002479	0.12152	38.3198	15	T(2): 1.0; S(6): 96.1; S(11): 1.0; S(13): 1.0; T(15): 1.0	Low		Medium	High
AT4G15545.1	unknown protein	SEIEEEEEEGSASAITGSR	2089.83	0.0036	0.160218	41.942	1	S(1): 98.3; S(11): 1.3; S(13): 0.4; T(16): 0.0; S(18): 0.0				High
AT4G17470.1	alpha/beta-Hydrolases superfamily protein	VRFISVPGGHIEITEEDLVKYVVPYLQNESLFSSEHETI	4794.15	0.006739	0.229448	0.134722	3	S(5): 50.2; T(14): 49.9; Y(21): 50.1; Y(25): 49.9; S(30): 50.2; S(33): 50.1; S(34): 49.9; T(38): 49.9						High
AT4G17720.1	RNA-binding (RRM/RBD/RNP motifs) family protein	VHLSESPKAASSTQEAER	2006.91	0.000141	0.00173386	60.5547	13	S(4): 13.8; S(6): 86.2; S(11): 0.0; S(12): 0.0; T(13): 0.0	High	High	High	High	High	High
AT4G22670.1	HSP70-interacting protein 1	SFVVEESDDDMDETEEVKPK	2407.97	0	7.73484e-08	109.439	10	S(1): 0.0; S(7): 100.0; T(14): 0.0		High		High
AT4G25890.1;AT5G57290.3	60S acidic ribosomal protein family	KKEESEEEEGDFGFDLFG	2171.87	0.00013	0.000336983	85.3675	19	S(5): 100.0		High	High	High	High	High
AT4G26330.1	Subtilisin-like serine endopeptidase family protein	SPRDYLGHGTHTASTAVGSVVR	2348.1	0.039941	0.689432	25.9918	4	S(1): 1.2; Y(5): 1.2; T(10): 81.9; T(12): 11.1; S(14): 1.2; T(15): 1.2; S(19): 2.3		Medium
AT4G26780.1	Co-chaperone GrpE family protein	ASSVVKESFSKLDTSEDSAGAAPLLK	2797.3	0.012801	0.278656	21.6059	2	S(2): 8.7; S(3): 8.7; S(8): 75.1; S(10): 75.1; T(14): 10.8; S(15): 10.8; S(18): 10.8			Medium		Low
AT4G28080.1	Tetratricopeptide repeat (TPR)-like superfamily protein	TVDGETENLPNGDSSPKSSVAADGEK	2684.15	0	2.54806e-05	73.1376	40	T(1): 0.0; T(6): 0.0; S(14): 96.0; S(15): 3.9; S(18): 0.0; S(19): 0.1	High	High	High	High	High	High
AT4G28080.1	Tetratricopeptide repeat (TPR)-like superfamily protein	DLCDAELKTVDGETENLPNGDSSPKSSVAADGEK	3628.59	0	1.6033e-08	59.036	36	T(9): 0.0; T(14): 1.2; S(22): 75.4; S(23): 17.7; S(26): 4.5; S(27): 1.2		High	High	High		High
AT4G28080.1	Tetratricopeptide repeat (TPR)-like superfamily protein	VVVGGSELTSSPKEIKNVEVEK	2408.24	0.004163	0.102929	13.6554	2	S(6): 9.4; T(9): 20.2; S(10): 20.2; S(11): 50.2	High
AT4G31120.2	SHK1 binding protein 1	DVHLGIEPTTATPNMFSW	2095.92	0.031227	0.430492	31.4984	1	T(9): 0.5; T(10): 0.5; T(12): 1.4; S(17): 97.6			Medium
AT4G34310.2	alpha/beta-Hydrolases superfamily protein	WHGSLVARLLLEDLKLPLSDSVSDWSSSLLATVSHASK	4198.18	0.024455	0.391439	5.49375	1	S(4): 27.5; S(19): 8.9; S(21): 8.0; S(23): 8.0; S(26): 8.0; S(27): 8.0; S(28): 8.0; T(32): 8.0; S(34): 8.0; S(37): 8.0					Medium
AT4G38770.1	proline-rich protein 4	KEVPPPVPVYKPPPK	1751.95	0.026158	0.406329	34.2785	1	Y(10): 100.0						Medium
AT5G01410.1	Aldolase-type TIM barrel family protein	EGTGVVAVYGNGAITEAK	1815.86	0.039952	0.463981	19.7176	1	T(3): 2.9; Y(9): 89.2; T(15): 8.0				Medium
AT5G07740.1	actin binding	SVYASALAIPAICSTSQAPTSSPTPPPPPPAYYSVGQK	4018.84	0.02894	0.559494	9.36898	10	S(1): 6.6; Y(3): 6.6; S(5): 6.6; S(14): 13.8; T(15): 13.8; S(16): 13.8; T(20): 13.8; S(21): 13.8; S(22): 13.8; T(24): 13.8; Y(32): 27.8; Y(33): 27.8; S(34): 27.8		Medium
AT5G09600.2	succinate dehydrogenase 3-1	TMQVSPELSGRSKPVVNDILGTGLGTNNAIR	3304.69	0.002651	0.0559782	11.4506	4	T(1): 9.1; S(5): 9.1; S(9): 31.8; S(12): 31.8; T(22): 9.1; T(26): 9.1					High
AT5G09810.1;AT2G37620.1	actin 1 / 7	ADGEDIQPLVCDNGTGMVKAGFAGDDAPR	3056.33	0.005154	0.11487	35.6145	5	T(15): 100.0	High		Low	Medium	Low	Low
AT5G11670.1	NADP-malic enzyme 2	LLIDNVEELLPVVYTPTVGEACQKYGSIFR	3503.76	0.021628	0.3762	26.2403	7	Y(14): 1.5; T(15): 7.1; T(17): 7.1; Y(25): 42.1; S(27): 42.1	Low			Low
AT5G16330.1	NC domain-containing protein-related	RGTCTIAPSDPCDEVISR	2193.86	0.039343	0.684857	63.905	3	T(3): 5.3; T(5): 0.4; S(9): 94.3; S(17): 100.0		Medium
AT5G19900.1	PRLI-interacting factor, putative	KSGGIAELVSPCPVTPAVLPTPMFSPSREVLGDMAK	3898.85	0.02365	0.384209	0.92714	2	S(2): 32.9; S(10): 32.9; T(15): 36.2; T(21): 36.2; S(25): 32.5; S(27): 29.3						Low
AT5G19940.1	Plastid-lipid associated protein PAP / fibrillin family protein	AATASSLTIASSFSEPRTQIHSSRR	2821.3	0.00203	0.108191	12.8888	1	T(3): 13.1; S(5): 23.4; S(6): 40.6; T(8): 40.6; S(11): 24.9; S(12): 18.9; S(14): 13.6; T(18): 13.6; S(22): 5.7; S(23): 5.7						High
AT5G23020.1	2-isopropylmalate synthase 2	STYEILSPEDVGIVKSENSGIVLGK	2714.33	0.044068	0.587115	2.68466	4	S(1): 19.7; T(2): 19.7; Y(3): 19.7; S(7): 19.7; S(16): 10.6; S(19): 10.6					Medium
AT5G40450.1	unknown protein	TEEDENDDEDHEHKDDKTSPDSIVMVEAK	3437.39	0.00013	0.000361432	12.1658	16	T(1): 61.9; T(18): 12.7; S(19): 12.7; S(22): 12.7		High	High	High
AT5G43060.1	Granulin repeat cysteine protease family protein	LSPMILLLAMIGVSYAMDMSIISYDENHHITTETSR	4132.94	0.041096	0.703394	9.90632	1	S(2): 0.5; S(14): 4.8; Y(15): 4.8; S(20): 4.8; S(23): 4.8; Y(24): 4.8; T(31): 18.9; T(32): 18.9; T(34): 18.9; S(35): 18.9		Medium
AT5G45510.2	Leucine-rich repeat (LRR) family protein	SGEHAEGEANDSQSGEKKEDTDGEDEIR	3099.22	0.002641	0.124374	45.2742	3	S(1): 0.0; S(12): 3.2; S(14): 15.3; T(21): 81.4				High
AT5G52310.1	low-temperature-responsive protein 78 (LTI78) / desiccation-responsive protein 29A (RD29A)	ISTEKAASEEGEAVEEEVK	2114.93	0	0.00112468	172.233	36	S(2): 0.0; T(3): 0.0; S(8): 100.0	High	High	High	High	High	High
AT5G52310.1	low-temperature-responsive protein 78 (LTI78) / desiccation-responsive protein 29A (RD29A)	ISTEKAASEEGEAVEEEVKGGGGMVGR	2786.25	0	2.0553e-07	69.0305	9	S(2): 0.3; T(3): 0.3; S(8): 99.5	High	High
AT5G52310.1	low-temperature-responsive protein 78 (LTI78) / desiccation-responsive protein 29A (RD29A)	GWFGGGATDEVKPESPHSVEEAPK	2591.14	0	2.21174e-07	97.1365	9	T(8): 0.0; S(15): 99.7; S(18): 0.3	High	High
AT5G52310.1	low-temperature-responsive protein 78 (LTI78) / desiccation-responsive protein 29A (RD29A)	EVEKISTEKAASEEGEAVEEEVK	2600.18	0	0.000184025	79.9731	27	S(6): 0.2; T(7): 0.2; S(12): 99.6	High	High	High	High	High	High
AT5G52310.1	low-temperature-responsive protein 78 (LTI78) / desiccation-responsive protein 29A (RD29A)	IKGWFGGGATDEVKPESPHSVEEAPK	2832.32	0	6.03333e-07	81.2654	35	T(10): 0.0; S(17): 99.8; S(20): 0.2	High	High	High	High	High	High
AT5G52310.1	low-temperature-responsive protein 78 (LTI78) / desiccation-responsive protein 29A (RD29A)	TESGNDKNSPMGFGSESGAELEK	2451	0	8.89552e-11	138.615	9	T(1): 0.0; S(3): 0.0; S(9): 0.0; S(15): 100.0; S(17): 0.0	High	High
AT5G52310.1	low-temperature-responsive protein 78 (LTI78) / desiccation-responsive protein 29A (RD29A)	DVPIHHPLSELSDREESR	2196	0	0.00699067	3.74558	16	S(9): 74.3; S(12): 18.1; S(17): 7.6	High	High	High	High	High	High
AT5G52310.1	low-temperature-responsive protein 78 (LTI78) / desiccation-responsive protein 29A (RD29A)	MDQTEEPPLNTHQQHPEEVEHHENGATK	3342.41	0	0.000179635	20.0691	22	T(4): 90.6; T(11): 8.5; T(27): 0.9	High	High	High	High	High	High
AT5G52310.1	low-temperature-responsive protein 78 (LTI78) / desiccation-responsive protein 29A (RD29A)	AASEEGEAVEEEVK	1556.64	0	0.000687054	145.755	2	S(3): 100.0			High	High
AT5G52310.1	low-temperature-responsive protein 78 (LTI78) / desiccation-responsive protein 29A (RD29A)	SHELDLKNESDIDKDVPTGFDGEPDFLAK	3311.49	0	0.0027675	57.9901	8	S(1): 0.6; S(10): 98.8; T(18): 0.6			High	High		High
AT5G52310.1	low-temperature-responsive protein 78 (LTI78) / desiccation-responsive protein 29A (RD29A)	TETGMDTNSPSRSHEFDLK	2231.93	0.00013	0.000435515	27.6439	7	T(1): 0.3; T(3): 0.7; T(7): 16.1; S(9): 62.0; S(11): 16.1; S(13): 4.8	High	High
AT5G52310.1	low-temperature-responsive protein 78 (LTI78) / desiccation-responsive protein 29A (RD29A)	RDVPIHHPLSELSDREESR	2352.11	0.000701	0.0106939	19.6029	6	S(10): 23.3; S(13): 67.4; S(18): 9.2	High		Low			Medium
AT5G52310.1	low-temperature-responsive protein 78 (LTI78) / desiccation-responsive protein 29A (RD29A)	SHDFDMKTETGMDTNSPSRSHEFDLK	3092.27	0.001083	0.0190673	13.3701	5	S(1): 1.6; T(8): 36.0; T(10): 36.0; T(14): 6.6; S(16): 6.6; S(18): 6.6; S(20): 6.6		High
AT5G52310.1	low-temperature-responsive protein 78 (LTI78) / desiccation-responsive protein 29A (RD29A)	RDVPIHHPLSELSDR	1850.89	0.001195	0.0582958	23.806	6	S(10): 19.7; S(13): 80.3			High	Low
AT5G52310.1	low-temperature-responsive protein 78 (LTI78) / desiccation-responsive protein 29A (RD29A)	DVPIHHPLSELSDR	1694.79	0.001903	0.0777956	53.0026	2	S(9): 2.7; S(12): 97.3			High	High
AT5G52310.1	low-temperature-responsive protein 78 (LTI78) / desiccation-responsive protein 29A (RD29A)	SSGWFGGGATEEVKPKSPHSVEESPQSLGSTVVPVQK	3889.88	0.002315	0.0545894	22.188	15	S(1): 3.7; S(2): 3.7; T(10): 17.6; S(17): 17.6; S(20): 17.6; S(24): 17.6; S(27): 17.6; S(30): 3.7; T(31): 1.0	High	High	High
AT5G55210.1	unknown protein	EKVISKDSEIEETEEFDTESPLPK	2859.3	0	0.00161314	40.4217	5	S(5): 0.0; S(8): 0.0; T(13): 0.2; T(18): 9.8; S(20): 89.9				High
AT5G56180.1	actin-related protein 8	TVVLTGGSACLPGLSER	1796.86	0.005762	0.118753	68.0466	2	T(1): 0.0; T(5): 0.0; S(8): 0.1; S(15): 99.8	Medium	High
AT5G63000.1	Mitochondrial import inner membrane translocase subunit Tim17/Tim22/Tim23 family protein	LAGNPNWGTATVVGVFAGLLYGGSKEASASVSKDAEVMLK	4075.01	0.002108	0.016786	9.78802	3	T(9): 44.4; T(11): 19.4; Y(21): 10.2; S(24): 6.5; S(28): 6.5; S(30): 6.5; S(32): 6.5					High
AT5G65600.1	Concanavalin A-like lectin protein kinase family protein	ADSRIGLVIGISASGFVFLTFMVITTVVVWSR	3761.75	0.010728	0.263514	12.4163	1	S(3): 87.4; S(12): 31.4; S(14): 51.4; T(20): 35.6; T(25): 44.0; T(26): 65.7; S(31): 84.4						Medium
ATMG00285.1	NADH dehydrogenase 2A	KSEFSTEAGSK	1250.52	0.001809	0.0963515	65.9291	3	S(2): 0.0; S(5): 9.0; T(6): 91.0; S(10): 0.0		Low		High
