# Supplementary material for: PAPE (Prefractionation-Assisted Phosphoprotein Enrichment): A Novel Approach for Phosphoproteomic Analysis of Green Tissues from Plants
Source: Proteomes. 2013 Dec 5;1(3):254–74. doi: 10.3390/proteomes1030254 (PMC5302697; doi:10.3390/proteomes1030254)
Supplement: Supplementary File 3 [file proteomes-01-00254-s003.xls]

## Sheet: Crude extract
Table S3:	List of Phosphoproteins linked to the associated phosphopeptides identified in this study
Accession	Description	ΣCoverage	Σ# Proteins	Σ# Unique Peptides	Σ# Peptides	Σ# PSMs	MH+ [Da]	q-Value	PEP	pRS Score	pRS Probability	pRS Site Probabilities
AT4G17520.1	Hyaluronan / mRNA binding family	36.39	1	6	9	106
	Sequence	# PSMs	# Proteins	# Protein Groups	Protein Group Accessions	Modifications	MH+ [Da]	q-Value	PEP	pRS Score	pRS Probability	pRS Site Probabilities
	SGKMPTKPPPPSQAVR	24	1	1	AT4G17520.1		1677.91	0	0.000896383
	ASVNPFDLLDDDAEDPSQIVASKPLKVVAPVQTAK	11	1	1	AT4G17520.1	N-Term(Acetyl)	3719.93	0	8.28869e-08
	AFEAMQQLSSK	1	1	1	AT4G17520.1	M5(Oxidation)	1255.6	0	4.22937e-06
	AFEAMQQLSSK	20	1	1	AT4G17520.1		1239.6	0	1.91794e-05
	SGKMPTKPPPPSQAVR	6	1	1	AT4G17520.1	M4(Oxidation)	1693.9	0	0.000208776
	DGGAAAQAPTPAIGDSAQFPTLGK	4	1	1	AT4G17520.1		2241.12	0	0.00119192
	ASVNPFDLLDDDAEDPSQIVASKPLK	1	1	1	AT4G17520.1	N-Term(Acetyl)	2826.41	0.000251	0.00576135
	EMTLEEYEK	24	4	2	AT4G17520.1;AT5G47210.1		1171.52	0.000769	0.0201635
	NNDGPANENGYGGGYRR	4	1	1	AT4G17520.1		1810.78	0.002246	0.078738
	NNDGPANENGYGGGYRR	6	1	1	AT4G17520.1	N9(Deamidated)	1811.78	0.011649	0.268933
	MPTKPPPPSQAVREARNAPGGGR	4	1	1	AT4G17520.1		2371.23	0.33263	1
	ITEREEKTR	1	1	1	AT4G17520.1	T8(Phospho)	1241.58	0.572587	1	15.772	0.895749	T(2): 10.4; T(8): 89.6
AT5G43830.1	Aluminium induced protein with YGL and LRDR motifs	12.35	2	2	2	7
	Sequence	# PSMs	# Proteins	# Protein Groups	Protein Group Accessions	Modifications	MH+ [Da]	q-Value	PEP	pRS Score	pRS Probability	pRS Site Probabilities
	VDSSGDVCGATFKVDAETKR	3	1	1	AT5G43830.1	S3(Phospho); C8(Carbamidomethyl)	2221.98	0	0.000664359	21.5576	0.0240339	S(3): 2.4; S(4): 2.4; T(11): 92.8; T(18): 2.4
	GCFFTSSGGLR	4	2	1	AT5G43830.1	C2(Carbamidomethyl)	1188.55	0	0.0031047
AT5G04430.1	binding to TOMV RNA 1L (long form)	45.69	2	9	13	146
	Sequence	# PSMs	# Proteins	# Protein Groups	Protein Group Accessions	Modifications	MH+ [Da]	q-Value	PEP	pRS Score	pRS Probability	pRS Site Probabilities
	EVVNGLELILDK	4	2	1	AT5G04430.1		1341.76	0	0.00672295
	RSPEPHDSSEADSAEKPTHIR	52	2	1	AT5G04430.1		2346.1	0	4.49526e-16
	LHSELHAEDGNEVEPR	20	2	1	AT5G04430.1		1831.85	0	4.63684e-08
	FLVSNAAAGSVIGKGGSTITEFQAK	16	2	1	AT5G04430.1		2453.3	0	4.68113e-05
	RSPEPHDSSEADSAEKPTHIR	15	2	1	AT5G04430.1	S2(Phospho)	2426.07	0	1.82085e-09	20.1292	0.806968	S(2): 80.7; S(8): 8.4; S(9): 8.4; S(13): 1.8; T(18): 0.8
	ISPLDNTFYGLSDR	8	2	1	AT5G04430.1		1597.78	0	1.08926e-05
	IIMISGSIK	12	2	1	AT5G04430.1		961.576	0	0.0381991
	SPEPHDSSEADSAEKPTHIR	8	2	1	AT5G04430.1	S1(Phospho)	2269.97	0	0.000124651	8.66132	0.50662	S(1): 50.7; S(7): 15.7; S(8): 15.7; S(12): 10.7; T(17): 7.3
	AIQQAETMIK	1	2	1	AT5G04430.1	M8(Oxidation)	1148.6	0	0.00132527
	EVVNGLELILDKLHSELHAEDGNEVEPR	4	2	1	AT5G04430.1		3154.61	7.7e-05	0.00241908
	SFIEESKAGIKISPLDNTFYGLSDR	1	2	1	AT5G04430.1	T18(Phospho)	2867.4	0.545761	1	9.86915	0.321726	S(1): 8.1; S(6): 14.9; S(13): 14.9; T(18): 32.2; Y(20): 14.9; S(23): 14.9
	NQEFFPGTTDRIIMISGSIK	1	2	1	AT5G04430.1	T9(Phospho)	2334.13	0.655157	1	3.38915	0.289165	T(8): 13.3; T(9): 28.9; S(16): 28.9; S(18): 28.9
	VSITGPQRAIQQAETMIKQK	3	2	1	AT5G04430.1	Q7(Deamidated); Q19(Deamidated)	2229.18
	GGSTITEFQAKSGAR	1	2	1	AT5G04430.1	Q9(Deamidated)	1510.75
AT4G31700.1	ribosomal protein S6	55.6	2	5	19	520
	Sequence	# PSMs	# Proteins	# Protein Groups	Protein Group Accessions	Modifications	MH+ [Da]	q-Value	PEP	pRS Score	pRS Probability	pRS Site Probabilities
	ISQEVSGDALGEEFK	56	3	2	AT5G10360.1;AT4G31700.1		1608.77	0	6.75778e-07
	KGENDLPGLTDTEKPR	20	2	1	AT4G31700.1		1769.9	0	2.32013e-08
	GCIVSPDLSVLNLVIVK	52	4	2	AT4G31700.1;AT5G10360.1	C2(Carbamidomethyl)	1826.04	0	2.47931e-05
	LVTPLTLQR	24	4	2	AT4G31700.1;AT5G10360.1		1040.65	0	0.0189504
	KLEIDDDQKLR	28	3	2	AT4G31700.1;AT5G10360.1		1372.74	0	0.00107586
	GENDLPGLTDTEKPR	24	2	1	AT4G31700.1		1641.81	0	2.62926e-05
	QGFPMKQGVLTPGR	20	3	2	AT4G31700.1;AT5G10360.1		1515.81	0	1.65566e-05
	LSSAAAKPSVTA	24	2	1	AT4G31700.1		1102.61	0	0.000223899
	MKFNVANPTTGCQKK	48	3	2	AT4G31700.1;AT5G10360.1	C12(Carbamidomethyl)	1723.86	0	1.69629e-05
	ISQEVSGDALGEEFKGYVFK	32	3	2	AT4G31700.1;AT5G10360.1		2203.09	0	9.39989e-05
	MKFNVANPTTGCQKK	12	3	2	AT4G31700.1;AT5G10360.1	M1(Oxidation); C12(Carbamidomethyl)	1739.85	0	5.20324e-05
	IQRLVTPLTLQR	24	4	2	AT4G31700.1;AT5G10360.1		1437.89	0	2.89776e-05
	GCIVSPDLSVLNLVIVKK	28	4	2	AT4G31700.1;AT5G10360.1	C2(Carbamidomethyl)	1954.14	0	0.001699
	KSVRGCIVSPDLSVLNLVIVK	20	4	2	AT4G31700.1;AT5G10360.1	C6(Carbamidomethyl)	2296.34	0	0.0121396
	MKFNVANPTTGCQK	40	3	2	AT4G31700.1;AT5G10360.1	C12(Carbamidomethyl)	1595.77	0	3.76422e-06
	SRLSSAAAKPSVTA	20	2	1	AT4G31700.1		1345.74	0	0.00138415
	SVRGCIVSPDLSVLNLVIVK	4	4	2	AT4G31700.1;AT5G10360.1	C5(Carbamidomethyl)	2168.24	0	4.97072e-16
	SRLSSAAAKPSVTA	30	2	1	AT4G31700.1	S4(Phospho)	1425.71	0.00019	0.049919	88.2757	0.92171	S(1): 0.0; S(4): 92.2; S(5): 7.7; S(11): 0.1; T(13): 0.0
	MKFNVANPTTGCQK	2	3	2	AT4G31700.1;AT5G10360.1	M1(Oxidation); C12(Carbamidomethyl)	1611.76	0.000653	0.0224574
	AFYDKR	4	1	1	AT4G31700.1		799.409	0.000952	0.0311555
	LLLHRGTPCFR	4	4	2	AT4G31700.1;AT5G10360.1	C9(Carbamidomethyl)	1369.75	0.006359	0.159555
	FNVANPTTGCQK	4	3	2	AT4G31700.1;AT5G10360.1	C10(Carbamidomethyl)	1336.63	0.021093	0.583046
AT4G01985.1	unknown protein; FUNCTIONS IN: molecular_function unknown; INVOLVED IN: biological_process unknown; LOCATED IN: endomembrane system; Has 35333 Blast hits to 34131 proteins in 2444 species: Archae - 798; Bacteria - 22429; Metazoa - 974; Fungi - 991; Plants - 531; Viruses - 0; Other Eukaryotes - 9610 (source: NCBI BLink).	11.4	1	2	2	7
	Sequence	# PSMs	# Proteins	# Protein Groups	Protein Group Accessions	Modifications	MH+ [Da]	q-Value	PEP	pRS Score	pRS Probability	pRS Site Probabilities
	GSVGVGAGAGGGASGGIGVGGGGGGGGGIGGSGGVGAGGGVGGGAGGAIGGGASGGAGGGGKGRGR	5	1	1	AT4G01985.1	S54(Phospho)	4742.24	0.000713	0.00849682	0.385836	0.263795	S(2): 24.5; S(14): 24.5; S(32): 24.5; S(54): 26.4
	GSVGVGAGAGGGASGGIGVGGGGGGGGGIGGSGGVGAGGGVGGGAGGAIGGGASGGAGGGGK	2	1	1	AT4G01985.1	S14(Phospho); S32(Phospho); S54(Phospho)	4475.89	0.095808	1	0.434462	0.242421	S(2): 75.8; S(14): 70.8; S(32): 75.8; S(54): 77.6
AT5G04380.1	S-adenosyl-L-methionine-dependent methyltransferases superfamily protein	4.42	1	1	1	7
	Sequence	# PSMs	# Proteins	# Protein Groups	Protein Group Accessions	Modifications	MH+ [Da]	q-Value	PEP	pRS Score	pRS Probability	pRS Site Probabilities
	DLVFEGLLSASKVYSFK	7	1	1	AT5G04380.1	S11(Phospho)	1982.97	0.000892	0.0791496	10.332	0.105875	S(9): 10.6; S(11): 10.6; Y(14): 10.6; S(15): 68.2
AT4G16830.1	Hyaluronan / mRNA binding family	34.65	3	7	8	192
	Sequence	# PSMs	# Proteins	# Protein Groups	Protein Group Accessions	Modifications	MH+ [Da]	q-Value	PEP	pRS Score	pRS Probability	pRS Site Probabilities
	DVGEKPAVDDVAADANKEDTVVEEK	68	3	1	AT4G16830.1		2643.26	0	8.68782e-10
	KKALQSLTTSER	32	3	1	AT4G16830.1		1361.77	0	0.000267894
	SGQVSSLPAKSAPKLPSKPLPPAQAVR	20	1	1	AT4G16830.1		2711.56	0	0.000819788
	VFESMQQLSNKK	28	5	2	AT4G16830.1;AT5G47210.1		1438.73	0	0.000502931
	DDGNNGYSGGYTKPSGEGDVSK	28	2	1	AT4G16830.1		2203.93	0	7.30448e-06
	ATLNPFDLLDDDAEDPSQLAVAIEK	2	1	1	AT4G16830.1	N-Term(Acetyl)	2742.33	0	2.75594e-05
	DVGEKPAVDDVAADANK	4	3	1	AT4G16830.1		1713.82	0	0.000294588
	ATLNPFDLLDDDAEDPSQLAVAIEK	1	1	1	AT4G16830.1	T2(Phospho)	2780.28	0.001	0.0151447	23.8085	0.990979	T(2): 99.1; S(17): 0.9
	VFESMQQLSNKK	5	5	2	AT4G16830.1;AT5G47210.1	M5(Oxidation)	1454.73	0.001025	0.0369801
	SAPKLPSKPLPPAQAVR	4	1	1	AT4G16830.1		1757.04	0.00177	0.0523341
AT5G25460.1	Protein of unknown function, DUF642	11.92	1	1	1	8
	Sequence	# PSMs	# Proteins	# Protein Groups	Protein Group Accessions	Modifications	MH+ [Da]	q-Value	PEP	pRS Score	pRS Probability	pRS Site Probabilities
	NILKNGGFEEGPLVLPGSTTGVLIPPFIEDDHSPLPGWMVESLK	8	1	1	AT5G25460.1	T19(Phospho); T20(Phospho); S33(Phospho)	4940.33	0.001065	0.0473831	0	0.1	S(18): 60.0; T(19): 60.0; T(20): 60.0; S(33): 60.0; S(42): 60.0
AT2G45820.1	Remorin family protein	29.47	1	4	4	62
	Sequence	# PSMs	# Proteins	# Protein Groups	Protein Group Accessions	Modifications	MH+ [Da]	q-Value	PEP	pRS Score	pRS Probability	pRS Site Probabilities
	VDVESPAVLAPAKEPTPAPVEVADEK	20	1	1	AT2G45820.1		2658.39	0	6.34419e-08
	ALAVVEKPIEEHTPK	24	1	1	AT2G45820.1		1660.92	0	0.00344203
	VAAIHKLAEEKR	12	1	1	AT2G45820.1		1364.8	8e-05	0.00309547
	TSKVDVESPAVLAPAKEPTPAPVEVADEK	4	1	1	AT2G45820.1		2974.55	0.000426	0.00707064
	ALAVVEKPIEEHTPK	2	1	1	AT2G45820.1	T13(Phospho)	1740.89	0.001632	0.0628501	48.283	1	T(13): 100.0
AT2G24270.2	aldehyde dehydrogenase 11A3	83.67	2	28	28	722
	Sequence	# PSMs	# Proteins	# Protein Groups	Protein Group Accessions	Modifications	MH+ [Da]	q-Value	PEP	pRS Score	pRS Probability	pRS Site Probabilities
	VQACTQEEVNAVMELAK	20	2	1	AT2G24270.2	C4(Carbamidomethyl)	1919.92	0	6.80984e-09
	DSGIGSQGVTNSINLMTK	24	2	1	AT2G24270.2		1821.9	0	5.94481e-08
	DSGIGSQGVTNSINLMTK	8	2	1	AT2G24270.2	M16(Oxidation)	1837.9	0	3.93212e-09
	EIAKPAKDSVTEVVR	48	2	1	AT2G24270.2		1641.91	0	9.28366e-06
	INSVEEGINHCNASNFGLQGCVFTK	32	2	1	AT2G24270.2	C11(Carbamidomethyl); C21(Carbamidomethyl)	2795.29	0	9.3889e-10
	SGDLISYCAEEGVR	24	2	1	AT2G24270.2	C8(Carbamidomethyl)	1555.7	0	7.26297e-06
	FLLSDSFPGNDR	8	2	1	AT2G24270.2		1367.66	0	0.00385677
	VKTTVINLPTPSYSMG	9	1	1	AT2G24270.2	M15(Oxidation)	1723.89	0	5.0729e-06
	IPLGVVLAIPPFNYPVNLAVSK	136	2	1	AT2G24270.2		2321.36	0	2.23041e-05
	VAKLTVGPPEENSDITAVVSESSANFIEGLVMDAK	24	2	1	AT2G24270.2		3617.81	0	5.67819e-06
	YCLTSKIPLGVVLAIPPFNYPVNLAVSK	52	2	1	AT2G24270.2	C2(Carbamidomethyl)	3073.71	0	0.000558768
	EKGATFCQEYKR	24	2	1	AT2G24270.2	C7(Carbamidomethyl)	1516.72	0	8.57674e-06
	CTAVKVVLVMESVADELVEK	24	2	1	AT2G24270.2	C1(Carbamidomethyl)	2219.17	0	8.27156e-05
	AAAILKDNKAPMAESLVK	24	2	1	AT2G24270.2		1870.04	0	0.000292048
	TKYCLTSKIPLGVVLAIPPFNYPVNLAVSK	36	2	1	AT2G24270.2	C4(Carbamidomethyl)	3302.86	0	0.000513918
	GPDHFPFQGLK	20	2	1	AT2G24270.2		1242.63	0	0.00510722
	IAPALIAGNSLVLKPPTQGAVSCLHMVHCFHLAGFPK	24	2	1	AT2G24270.2	C23(Carbamidomethyl); C29(Carbamidomethyl)	3952.08	0	0.000830484
	AGTGLFAEILDGEVYK	12	2	1	AT2G24270.2	N-Term(Acetyl)	1724.87	0	2.52332e-10
	GSEIGDFLTMHPAVNCISFTGGDTGISISK	4	2	1	AT2G24270.2	N15(Deamidated); C16(Carbamidomethyl)	3112.47	0	2.55153e-08
	DACIVLDDADLDLVASNIIK	1	2	1	AT2G24270.2	C3(Carbamidomethyl); N17(Deamidated)	2174.1	0	3.18709e-06
	LTVGPPEENSDITAVVSESSANFIEGLVMDAK	9	2	1	AT2G24270.2	N9(Deamidated)	3320.63	0	7.99386e-05
	DACIVLDDADLDLVASNIIK	32	2	1	AT2G24270.2	C3(Carbamidomethyl)	2173.11	0	0.000382084
	IAWEEPFGPVVPVLR	12	2	1	AT2G24270.2		1708.94	0	0.00210942
	LTVGPPEENSDITAVVSESSANFIEGLVMDAK	28	2	1	AT2G24270.2		3319.62	0	9.53045e-07
	VVLVMESVADELVEK	8	2	1	AT2G24270.2		1659.89	0	1.4131e-05
	GSEIGDFLTMHPAVNCISFTGGDTGISISKK	8	2	1	AT2G24270.2	C16(Carbamidomethyl)	3239.57	0	0.00123456
	GSEIGDFLTMHPAVNCISFTGGDTGISISK	16	2	1	AT2G24270.2	C16(Carbamidomethyl)	3111.47	0	8.5621e-10
	AGMIPLQMELGGK	8	2	1	AT2G24270.2		1344.7	0	0.0322789
	AGTGLFAEILDGEVYKYYADGEWK	3	2	1	AT2G24270.2	N-Term(Acetyl)	2737.29	0	3.136e-06
	VAKLTVGPPEENSDITAVVSESSANFIEGLVMDAK	6	2	1	AT2G24270.2	N12(Deamidated)	3618.83	0	9.39611e-06
	LTVGPPEENSDITAVVSESSANFIEGLVMDAK	2	2	1	AT2G24270.2	N9(Deamidated); N22(Deamidated)	3321.61	0	0.000481468
	LTVGPPEENSDITAVVSESSANFIEGLVMDAK	2	2	1	AT2G24270.2	M29(Oxidation)	3335.62	0	0.000168511
	AILISDAMETGTVQINSAPARGPDHFPFQGLK	3	2	1	AT2G24270.2	Q29(Deamidated)	3382.73	0	6.3102e-05
	VQACTQEEVNAVMELAK	3	2	1	AT2G24270.2	Q2(Deamidated); C4(Carbamidomethyl)	1920.92	0	1.13275e-07
	AILISDAMETGTVQINSAPARGPDHFPFQGLK	3	2	1	AT2G24270.2	M8(Oxidation)	3397.72	7.6e-05	0.00186764
	GSEIGDFLTMHPAVNCISFTGGDTGISISKK	1	2	1	AT2G24270.2	N15(Deamidated); C16(Carbamidomethyl)	3240.57	9.6e-05	0.00223247
	AGTGLFAEILDGEVYK	4	2	1	AT2G24270.2	T3(Phospho)	1762.82	0.001248	0.0320495	56.002	0.999996	T(3): 100.0; Y(15): 0.0
	AAAILKDNKAPMAESLVK	1	2	1	AT2G24270.2	M12(Oxidation)	1886.04	0.002537	0.08253
	TTVINLPTPSYSMG	4	1	1	AT2G24270.2		1480.73	0.002561	0.0632331
	YCLTSKIPLGVVLAIPPFNYPVNLAVSK	2	2	1	AT2G24270.2	C2(Carbamidomethyl); N19(Deamidated)	3074.72	0.002663	0.0632009
	IPLGVVLAIPPFNYPVNLAVSK	2	2	1	AT2G24270.2	N13(Deamidated)	2322.36	0.00612	0.177823
	SVAIMNPATRK	7	2	1	AT2G24270.2	M5(Oxidation)	1203.66	0.007923	0.229764
	IAPALIAGNSLVLKPPTQGAVSCLHMVHCFHLAGFPK	2	2	1	AT2G24270.2	Q18(Deamidated); C23(Carbamidomethyl); C29(Carbamidomethyl)	3953.1	0.011079	0.279653
	TKYCLTSKIPLGVVLAIPPFNYPVNLAVSK	2	2	1	AT2G24270.2	C4(Carbamidomethyl); N21(Deamidated)	3303.86	0.026573	0.555418
AT1G32200.1	phospholipid/glycerol acyltransferase family protein	66.88	1	15	17	337
	Sequence	# PSMs	# Proteins	# Protein Groups	Protein Group Accessions	Modifications	MH+ [Da]	q-Value	PEP	pRS Score	pRS Probability	pRS Site Probabilities
	SVNEQYEILNSAIK	24	1	1	AT1G32200.1		1607.83	0	9.608e-08
	LVGFHGTGLSIAPEINFSDVTADCESPNEAK	36	1	1	AT1G32200.1	C24(Carbamidomethyl)	3275.54	0	4.04753e-05
	ADETVVSNMSVAFDR	3	1	1	AT1G32200.1	M9(Oxidation)	1656.75	0	1.93412e-07
	ESSVAASIAFNEAAGETPSELSHSR	24	1	1	AT1G32200.1		2547.19	0	2.63625e-08
	NSYVGNASIFSELEDK	28	1	1	AT1G32200.1		1772.83	0	4.84607e-06
	RLVGFHGTGLSIAPEINFSDVTADCESPNEAK	36	1	1	AT1G32200.1	C25(Carbamidomethyl)	3431.65	0	8.28965e-06
	QGHNIVLISNHQSEADPAVISLLLEAQSPFIGENIK	32	1	1	AT1G32200.1		3882.04	0	0.000104525
	VITDPLCKPFSMGR	20	1	1	AT1G32200.1	C7(Carbamidomethyl)	1620.82	0	0.000283578
	MLLGVEDPYTFNPYHKAVR	28	1	1	AT1G32200.1		2250.14	0	0.000539442
	RLVGFHGTGLSIAPEINFSDVTADCESPNEAK	5	1	1	AT1G32200.1	N17(Deamidated); C25(Carbamidomethyl)	3432.65	0	5.23407e-07
	MLLGVEDPYTFNPYHK	24	1	1	AT1G32200.1		1923.93	0	0.000177356
	ADETVVSNMSVAFDR	16	1	1	AT1G32200.1		1640.76	0	0.000291346
	KHMNDDPELVDMK	12	1	1	AT1G32200.1		1571.72	0	0.000325032
	SVNEQYEILNSAIKHRR	12	1	1	AT1G32200.1		2057.09	0	0.00992267
	QGHNIVLISNHQSEADPAVISLLLEAQSPFIGENIK	6	1	1	AT1G32200.1	Q1(Deamidated)	3883.04	9.6e-05	0.00245759
	LVEHSGAPGHIYPMSLLCYDIMPPPPQVEK	4	1	1	AT1G32200.1	C18(Carbamidomethyl)	3375.65	0.000992	0.0259629
	MTLTFSSSAATVAVAAATVTSSARVPVYPLASSTLRGLVSFR	19	1	1	AT1G32200.1	T4(Phospho)	4324.24	0.00167	0.132566	4.22154	0.0765529	T(2): 7.7; T(4): 7.7; S(6): 7.7; S(7): 7.7; S(8): 7.7; T(11): 7.7; T(18): 7.7; T(20): 7.7; S(21): 7.7; S(22): 7.7; Y(28): 7.7; S(32): 3.9; S(33): 3.9; T(34): 3.9; S(40): 3.9
	LVEHSGAPGHIYPMSLLCYDIMPPPPQVEK	1	1	1	AT1G32200.1	C18(Carbamidomethyl); Q27(Deamidated)	3376.65	0.005511	0.114909
	EAEAGRLPANVAAGMEELYWNYK	2	1	1	AT1G32200.1	N10(Deamidated)	2583.23	0.013342	0.302306
	MTLTFSSSAATVAVAAATVTSSARVPVYPLASSTLR	1	1	1	AT1G32200.1	S7(Phospho); S8(Phospho); T11(Phospho); T18(Phospho)	3904.78	0.386477	1			Too many isoforms
	DRPNPSTGEWFPAPFDASSVDNMRR	4	1	1	AT1G32200.1	T7(Phospho); S19(Phospho)	3009.25	0.488649	1	2.68466	0.196933	S(6): 50.0; T(7): 50.0; S(18): 50.0; S(19): 50.0
AT2G24940.1	membrane-associated progesterone binding protein 2	70	1	6	6	105
	Sequence	# PSMs	# Proteins	# Protein Groups	Protein Group Accessions	Modifications	MH+ [Da]	q-Value	PEP	pRS Score	pRS Probability	pRS Site Probabilities
	NEEDVSPSLEGLTEK	32	1	1	AT2G24940.1		1646.77	0	6.5204e-08
	SFYGSGGDYSMFAGK	7	1	1	AT2G24940.1	M11(Oxidation)	1589.66	0	2.67322e-06
	MSKNEEDVSPSLEGLTEK	32	1	1	AT2G24940.1		1992.94	0	8.05087e-07
	MEFTAEQLSQYNGTDESKPIYVAIKGR	10	1	1	AT2G24940.1	N-Term(Acetyl)	3117.52	0	5.90525e-08
	MEFTAEQLSQYNGTDESKPIYVAIK	10	1	1	AT2G24940.1	N-Term(Acetyl)	2904.4	0	1.94323e-09
	FEAKYPVVGR	8	1	1	AT2G24940.1		1165.63	0	0.000368083
	MEFTAEQLSQYNGTDESKPIYVAIK	6	1	1	AT2G24940.1	T4(Phospho)	2942.36	0.002158	0.0840649	2.68466	0.18054	T(4): 18.1; S(9): 18.1; Y(11): 18.1; T(14): 18.1; S(17): 18.1; Y(21): 9.7
AT2G04842.1	threonyl-tRNA synthetase, putative / threonine--tRNA ligase, putative	4	1	2	2	58
	Sequence	# PSMs	# Proteins	# Protein Groups	Protein Group Accessions	Modifications	MH+ [Da]	q-Value	PEP	pRS Score	pRS Probability	pRS Site Probabilities
	FGGELGTIPVDDLINKINIAVETR	24	1	1	AT2G04842.1		2584.4	0	2.35701e-07
	SRFGGELGTIPVDDLINKINIAVETR	28	1	1	AT2G04842.1		2827.53	0	2.97779e-08
	SRFGGELGTIPVDDLINKINIAVETR	2	1	1	AT2G04842.1	N17(Deamidated)	2828.53	0.000187	0.0034088
	FGGELGTIPVDDLINKINIAVETR	4	1	1	AT2G04842.1	T7(Phospho)	2664.38	0.002166	0.108943	13.3192	0.94387	T(7): 94.4; T(23): 5.6
AT5G58140.4	phototropin 2	14.37	3	4	4	43
	Sequence	# PSMs	# Proteins	# Protein Groups	Protein Group Accessions	Modifications	MH+ [Da]	q-Value	PEP	pRS Score	pRS Probability	pRS Site Probabilities
	ALDSITEVVQTIR	20	3	1	AT5G58140.4		1444.8	0	3.33097e-05
	APPSPLNDAESLSER	12	3	1	AT5G58140.4		1582.77	0	0.00248816
	SQVQESVSNDTMVKPDSSTTPTPGRQTR	8	3	1	AT5G58140.4		3033.45	0	0.00495429
	KIQASGETVGLHHFKPIKPLGSGDTGSVHLVELKGTGELYAMK	3	3	1	AT5G58140.4	T25(Phospho)	4610.38	0.002651	0.0438936	3.61623e-14	0.135898	S(5): 13.6; T(8): 13.6; S(22): 13.6; T(25): 13.6; S(27): 13.6; T(36): 14.9; Y(40): 17.1
AT1G14370.1	protein kinase 2A	5.87	1	1	1	3
	Sequence	# PSMs	# Proteins	# Protein Groups	Protein Group Accessions	Modifications	MH+ [Da]	q-Value	PEP	pRS Score	pRS Probability	pRS Site Probabilities
	VDNSNHSPHANSASSGSKVSSKTSR	3	1	1	AT1G14370.1	S24(Phospho)	2621.17	0.034663	0.565868	35.0769	0.727931	S(4): 0.0; S(7): 0.0; S(12): 0.0; S(14): 0.1; S(15): 0.3; S(17): 0.6; S(20): 1.8; S(21): 5.4; T(23): 18.9; S(24): 72.8
AT4G18810.2	NAD(P)-binding Rossmann-fold superfamily protein	26.32	2	7	9	107
	Sequence	# PSMs	# Proteins	# Protein Groups	Protein Group Accessions	Modifications	MH+ [Da]	q-Value	PEP	pRS Score	pRS Probability	pRS Site Probabilities
	DSGIPFAIVRPCALTEEPAGADLIFEQGDNITGK	28	2	1	AT4G18810.2	C12(Carbamidomethyl)	3601.78	0	2.75679e-09
	ELDFILTYK	4	2	1	AT4G18810.2		1141.61	0	0.0096337
	KVINAVSVIVGPK	24	2	1	AT4G18810.2		1323.84	0	2.83048e-05
	LTNGATEEPVAEMGTSGIILVAGATGGVGRR	1	2	1	AT4G18810.2	N3(Deamidated)	2985.54	0	0.000565999
	LTNGATEEPVAEMGTSGIILVAGATGGVGRR	36	2	1	AT4G18810.2		2984.54	0	0.000222134
	ICIAALESPYALNK	8	2	1	AT4G18810.2	C2(Carbamidomethyl)	1562.82	0	4.55995e-05
	STVPFSEPFTVDPENPPPEK	1	2	1	AT4G18810.2	N15(Deamidated)	2215.05	0.001118	0.0221941
	GIVSTTNNGGFTSVRTKNFPEAENVSAYDGLELR	2	2	1	AT4G18810.2	S13(Phospho)	3723.77	0.003062	0.178009	0.384464	0.122641	S(4): 11.2; T(5): 11.2; T(6): 11.2; T(12): 12.3; S(13): 12.3; T(16): 12.3; S(26): 13.6; Y(28): 15.9
	LTNGATEEPVAEMGTSGIILVAGATGGVGR	1	2	1	AT4G18810.2	M13(Oxidation)	2844.46	0.099255	0.974399
	LTNGATEEPVAEMGTSGIILVAGATGGVGRR	1	2	1	AT4G18810.2	T2(Phospho); T15(Phospho); S16(Phospho); T25(Phospho)	3304.4	0.115876	0.773237	0.261596	0.19156	T(2): 80.8; T(6): 80.8; T(15): 80.8; S(16): 80.8; T(25): 76.6
	EALEQSTVAK	1	1	1	AT4G18810.2	Q5(Deamidated)	1076.54
AT5G14740.2	carbonic anhydrase 2	77.99	5	20	33	1356
	Sequence	# PSMs	# Proteins	# Protein Groups	Protein Group Accessions	Modifications	MH+ [Da]	q-Value	PEP	pRS Score	pRS Probability	pRS Site Probabilities
	KITAELQAASSSDSK	56	5	1	AT5G14740.2		1535.79	0	7.31171e-09
	VLAESESSAFEDQCGR	40	5	1	AT5G14740.2	C14(Carbamidomethyl)	1784.77	0	4.57543e-08
	ITAELQAASSSDSK	76	5	1	AT5G14740.2		1407.69	0	4.35823e-10
	VKKITAELQAASSSDSK	92	5	1	AT5G14740.2		1762.95	0	6.45645e-05
	EAVNVSLANLLTYPFVR	104	5	2	AT5G14740.2;AT3G01500.1		1906.04	0	8.41281e-09
	YETNPALYGELAKGQSPK	60	8	2	AT5G14740.2;AT3G01500.1		1965.99	0	4.72976e-07
	EKYETNPALYGELAKGQSPK	60	8	2	AT5G14740.2;AT3G01500.1		2223.13	0	3.13968e-08
	GLMSFPLDGNNSTDFIEDWVK	36	8	2	AT5G14740.2;AT3G01500.1		2385.1	0	2.20536e-08
	EKYETNPALYGELAK	60	8	2	AT5G14740.2;AT3G01500.1		1725.87	0	1.39465e-06
	GNESYEDAIEALK	24	1	1	AT5G14740.2		1438.67	0	2.676e-06
	YETNPALYGELAK	48	8	2	AT5G14740.2;AT3G01500.1		1468.73	0	1.13465e-06
	LLIEKDDLKDVAAAK	44	5	1	AT5G14740.2		1641.94	0	0.00105422
	GNESYEDAIEALKK	56	1	1	AT5G14740.2		1566.76	0	5.82736e-05
	KITAELQAASSSDSKSFDPVER	60	5	1	AT5G14740.2		2366.18	0	1.11477e-09
	DDLKDVAAAK	24	5	1	AT5G14740.2		1045.55	0	0.0063417
	VENIVVIGHSACGGIK	48	8	2	AT5G14740.2;AT3G01500.1	C12(Carbamidomethyl)	1652.88	0	0.00126667
	ITAELQAASSSDSKSFDPVER	32	5	1	AT5G14740.2		2238.1	0	6.3069e-06
	NIANMVPPFDK	7	8	2	AT5G14740.2;AT3G01500.1	M5(Oxidation)	1261.62	0	0.000337762
	EGFVTFKK	24	5	1	AT5G14740.2		955.525	0	0.00129072
	NIANMVPPFDK	24	8	2	AT5G14740.2;AT3G01500.1		1245.63	0	0.0014935
	NIANMVPPFDKVK	40	8	2	AT5G14740.2;AT3G01500.1		1472.79	0	0.00292263
	YMVFACSDSR	6	8	2	AT5G14740.2;AT3G01500.1	M2(Oxidation); C6(Carbamidomethyl)	1251.51	0	0.000466873
	IKEGFVTFKK	16	5	1	AT5G14740.2		1196.7	0	0.00178223
	LLIEKDDLK	20	5	1	AT5G14740.2		1086.64	0	0.0363487
	YMVFACSDSR	40	8	2	AT5G14740.2;AT3G01500.1	C6(Carbamidomethyl)	1235.52	0	0.000322408
	KEKYETNPALYGELAK	20	8	2	AT5G14740.2;AT3G01500.1		1853.96	0	5.4984e-05
	DDLKDVAAAKVK	24	5	1	AT5G14740.2		1272.71	0	6.35125e-06
	SKVLAESESSAFEDQCGR	32	5	1	AT5G14740.2	C16(Carbamidomethyl)	1999.9	0	1.41723e-06
	VCPSHVLDFHPGDAFVVR	48	5	1	AT5G14740.2	C2(Carbamidomethyl)	2052.01	0	4.24487e-06
	GNESYEDAIEALKKLLIEK	32	1	1	AT5G14740.2		2163.15	0	0.000576142
	KLLIEKDDLK	24	5	1	AT5G14740.2		1214.74	0	0.0244244
	GNESYEDAIEALKK	7	1	1	AT5G14740.2	N-Term(Acetyl)	1608.77	0	2.66895e-05
	GNESYEDAIEALKKLLIEK	7	1	1	AT5G14740.2	N-Term(Acetyl)	2205.16	0	0.00039008
	VKKITAELQAASSSDSK	3	5	1	AT5G14740.2	Q9(Deamidated)	1763.94	0	1.86998e-05
	EKYETNPALYGELAKGQSPK	6	8	2	AT5G14740.2;AT3G01500.1	Q17(Deamidated)	2224.11	0	0.00106948
	GLMSFPLDGNNSTDFIEDWVKICLPAK	4	8	2	AT5G14740.2;AT3G01500.1	C23(Carbamidomethyl)	3067.48	0	0.000553332
	KITAELQAASSSDSKSFDPVER	2	5	1	AT5G14740.2	Q7(Deamidated)	2367.18	0	2.55484e-08
	ITAELQAASSSDSKSFDPVER	1	5	1	AT5G14740.2	Q6(Deamidated)	2239.09	0	2.09983e-05
	YETNPALYGELAKGQSPK	2	8	2	AT5G14740.2;AT3G01500.1	Q15(Deamidated)	1966.98	0	3.92528e-05
	GLMSFPLDGNNSTDFIEDWVK	2	8	2	AT5G14740.2;AT3G01500.1	N11(Deamidated)	2386.1	0	0.000861358
	GQSPKYMVFACSDSR	1	8	2	AT5G14740.2;AT3G01500.1	M7(Oxidation); C11(Carbamidomethyl)	1748.77	0.000146	0.00432891
	SFDPVER	24	5	1	AT5G14740.2		849.41	0.000513	0.0124806
	SKVLAESESSAFEDQCGR	1	5	1	AT5G14740.2	Q15(Deamidated); C16(Carbamidomethyl)	2000.9	0.002201	0.0721546
	GNESYEDAIEALKK	2	1	1	AT5G14740.2	Y5(Phospho)	1646.72	0.003091	0.160506	27.63	0.791996	S(4): 20.8; Y(5): 79.2
	EGFVTFK	16	5	1	AT5G14740.2		827.429	0.007923	0.229974
	YETNPALYGELAKGQSPK	1	8	2	AT5G14740.2;AT3G01500.1	N4(Deamidated); Q15(Deamidated)	1967.97
AT1G17480.1	IQ-domain 7	9.16	1	1	1	2
	Sequence	# PSMs	# Proteins	# Protein Groups	Protein Group Accessions	Modifications	MH+ [Da]	q-Value	PEP	pRS Score	pRS Probability	pRS Site Probabilities
	GSYAASSLGSELPSFSADEAFTTAMAALIRAPPR	2	1	1	AT1G17480.1	T23(Phospho)	3522.66	0.007179	0.239078	5.34791	0.173147	S(2): 10.3; Y(3): 10.3; S(6): 10.3; S(7): 10.3; S(10): 10.3; S(14): 10.3; S(16): 10.3; T(22): 10.3; T(23): 17.3
AT1G51310.1	transferases;tRNA (5-methylaminomethyl-2-thiouridylate)-methyltransferases	7.04	1	1	1	2
	Sequence	# PSMs	# Proteins	# Protein Groups	Protein Group Accessions	Modifications	MH+ [Da]	q-Value	PEP	pRS Score	pRS Probability	pRS Site Probabilities
	HAFIVDQYLSCSMPEKPLRVAVLLSGGVDSSVALR	2	1	1	AT1G51310.1	C11(Carbamidomethyl); S25(Phospho)	3894.96	0.009368	0.286291	4.4972	0.19004	Y(8): 6.7; S(10): 6.7; S(12): 6.7; S(25): 19.0; S(30): 19.0; S(31): 41.8
AT3G23490.1	cyanase	39.29	1	6	7	188
	Sequence	# PSMs	# Proteins	# Protein Groups	Protein Group Accessions	Modifications	MH+ [Da]	q-Value	PEP	pRS Score	pRS Probability	pRS Site Probabilities
	TFSQLAAETGLTNVYVAQLLR	64	1	1	AT3G23490.1		2295.23	0	9.21218e-10
	KQSVTNQLLAVK	24	1	1	AT3G23490.1		1328.79	0	0.000307148
	SASGKTFSQLAAETGLTNVYVAQLLRR	20	1	1	AT3G23490.1		2881.54	0	3.87721e-07
	TFSQLAAETGLTNVYVAQLLRR	16	1	1	AT3G23490.1		2451.33	0	0.00433706
	SYDPNLIQEPTIYR	16	1	1	AT3G23490.1		1708.85	0	0.000104635
	SASGKTFSQLAAETGLTNVYVAQLLRR	3	1	1	AT3G23490.1	Q9(Deamidated)	2882.55	0	5.45851e-06
	TFSQLAAETGLTNVYVAQLLRR	7	1	1	AT3G23490.1	Q18(Deamidated)	2452.34	0	0.00109058
	LNEAVMHFGESIK	20	1	1	AT3G23490.1		1474.73	0.000236	0.00426305
	QSVTNQLLAVK	16	1	1	AT3G23490.1		1200.69	0.000442	0.0104284
	TFSQLAAETGLTNVYVAQLLR	2	1	1	AT3G23490.1	S3(Phospho); Y15(Phospho)	2455.16	0.009966	0.291701	7.1468	0.0714068	T(1): 26.7; S(3): 26.7; T(9): 51.9; T(12): 63.6; Y(15): 31.2
AT1G51130.1	Nse4, component of Smc5/6 DNA repair complex	9.43	1	1	1	2
	Sequence	# PSMs	# Proteins	# Protein Groups	Protein Group Accessions	Modifications	MH+ [Da]	q-Value	PEP	pRS Score	pRS Probability	pRS Site Probabilities
	SQSAHGVSPAEFVNALISGFGQGSLGIDTDETAQVSLK	2	1	1	AT1G51130.1	S1(Phospho); S36(Phospho)	3977.82	0.010616	0.296665	4.78711	0.0707323	S(1): 25.3; S(3): 25.3; S(8): 25.3; S(18): 20.5; S(24): 20.5; T(29): 20.5; T(32): 24.2; S(36): 38.4
AT3G28360.1	P-glycoprotein 16	4.23	1	1	2	2
	Sequence	# PSMs	# Proteins	# Protein Groups	Protein Group Accessions	Modifications	MH+ [Da]	q-Value	PEP	pRS Score	pRS Probability	pRS Site Probabilities
	TTGRAIAEAGTMTTDLAK	1	1	1	AT3G28360.1	T1(Phospho); T2(Phospho)	1967.86	0.011841	0.36039	20.1891	0.348439	T(1): 58.8; T(2): 58.8; T(11): 34.1; T(13): 34.1; T(14): 14.1
	IYVLLFFGLALFTFFTSISQQYSFSYMGEYLTKR	1	1	1	AT3G28360.1	Y2(Phospho); T13(Phospho); T16(Phospho); Y22(Phospho); Y26(Phospho)	4480.89	0.58559	1			Too many isoforms
AT4G01510.1	Arv1-like protein	16.67	1	1	1	1
	Sequence	# PSMs	# Proteins	# Protein Groups	Protein Group Accessions	Modifications	MH+ [Da]	q-Value	PEP	pRS Score	pRS Probability	pRS Site Probabilities
	TNDGSNVSMSFLFESLEVLVNVLSANFAFVFSFAFAAK	1	1	1	AT4G01510.1	T1(Phospho); S5(Phospho); S32(Phospho)	4359.94	0.012785	0.357662	7.11218	0.0834914	T(1): 51.8; S(5): 42.9; S(8): 37.1; S(10): 37.1; S(15): 37.4; S(24): 40.0; S(32): 53.6
AT5G35570.1	O-fucosyltransferase family protein	3.22	1	1	1	3
	Sequence	# PSMs	# Proteins	# Protein Groups	Protein Group Accessions	Modifications	MH+ [Da]	q-Value	PEP	pRS Score	pRS Probability	pRS Site Probabilities
	KEVLPLLKQHIVMYLTHTDSR	3	1	1	AT5G35570.1	T16(Phospho)	2601.36	0.032806	0.492463	3.22914	0.25	Y(14): 25.0; T(16): 25.0; T(18): 25.0; S(20): 25.0
AT1G14010.1	emp24/gp25L/p24 family/GOLD family protein	8.96	1	1	1	11
	Sequence	# PSMs	# Proteins	# Protein Groups	Protein Group Accessions	Modifications	MH+ [Da]	q-Value	PEP	pRS Score	pRS Probability	pRS Site Probabilities
	SSIVLLILSILSPVTLSIR	11	1	1	AT1G14010.1	S9(Phospho); S12(Phospho)	2184.21	0.016281	0.37895	58.2659	0.740104	S(1): 15.3; S(2): 15.3; S(9): 84.3; S(12): 84.6; T(15): 0.5; S(17): 0.0
AT3G12580.1	heat shock protein 70	26.77	2	2	14	217
	Sequence	# PSMs	# Proteins	# Protein Groups	Protein Group Accessions	Modifications	MH+ [Da]	q-Value	PEP	pRS Score	pRS Probability	pRS Site Probabilities
	VEIIANDQGNRTTPSYVAFTDSER	24	6	3	AT5G02500.1;AT3G09440.1;AT3G12580.1		2683.29	0	1.70901e-09
	VQQLLQDFFNGK	24	5	2	AT5G02500.1;AT3G12580.1		1436.75	0	2.12499e-05
	NALENYAYNMR	24	5	3	AT5G02500.1;AT3G09440.1;AT3G12580.1		1358.61	0	4.88446e-05
	GEGPAIGIDLGTTYSCVGVWQHDR	12	6	3	AT5G02500.1;AT3G09440.1;AT3G12580.1	C16(Carbamidomethyl)	2588.21	0	1.21777e-05
	VEIIANDQGNR	20	6	3	AT5G02500.1;AT3G09440.1;AT3G12580.1		1228.63	0	1.09176e-05
	NALENYAYNMR	6	5	3	AT5G02500.1;AT3G09440.1;AT3G12580.1	M10(Oxidation)	1374.61	0	0.00117593
	IINEPTAAAIAYGLDKK	28	10	5	AT5G28540.1;AT5G42020.1;AT5G02500.1;AT3G09440.1;AT3G12580.1		1787.99	0	9.93621e-06
	MVNHFVQEFK	32	6	3	AT5G02500.1;AT3G09440.1;AT3G12580.1		1278.63	0	1.19484e-05
	IINEPTAAAIAYGLDK	4	10	5	AT5G28540.1;AT5G42020.1;AT5G02500.1;AT3G09440.1;AT3G12580.1		1659.9	0	4.79381e-05
	NKITITNDKGR	12	5	3	AT5G02500.1;AT3G09440.1;AT3G12580.1		1259.71	0	0.000201231
	TTPSYVAFTDSER	12	6	3	AT5G02500.1;AT3G09440.1;AT3G12580.1		1473.68	0	0.00150974
	ELESLCNPIIAR	4	1	1	AT3G12580.1	C6(Carbamidomethyl)	1414.73	0	0.00289006
	GEGPAIGIDLGTTYSCVGVWQHDR	1	6	3	AT5G02500.1;AT3G09440.1;AT3G12580.1	C16(Carbamidomethyl); Q21(Deamidated)	2589.21	0.000161	0.0116212
	NAVVTVPAYFNDSQR	12	7	3	AT5G02500.1;AT3G09440.1;AT3G12580.1		1680.83	0.000461	0.022822
	VQDLLLLDVTPLSLGLETAGGVMTVLIPRNTTIPTK	1	1	1	AT3G12580.1	T10(Phospho); S13(Phospho); T35(Phospho)	4029.06	0.017353	0.372216	1.92865e-15	0.0224432	T(10): 44.4; S(13): 44.4; T(18): 42.2; T(24): 42.2; T(31): 42.2; T(32): 42.2; T(35): 42.2
	MVNHFVQEFKRK	1	6	3	AT5G02500.1;AT3G09440.1;AT3G12580.1	N3(Deamidated); Q7(Deamidated)	1564.8
AT5G17990.1	tryptophan biosynthesis 1	19.37	1	2	3	37
	Sequence	# PSMs	# Proteins	# Protein Groups	Protein Group Accessions	Modifications	MH+ [Da]	q-Value	PEP	pRS Score	pRS Probability	pRS Site Probabilities
	SSSSACGSADVLEALGVVLDLGPEGIKR	32	1	1	AT5G17990.1	C6(Carbamidomethyl)	2787.42	0	0.00300761
	LSGILTSFNAVDDASSSCGRSNLTGVRIFPTLSR	1	1	1	AT5G17990.1	C18(Carbamidomethyl); S21(Phospho); T24(Phospho); T31(Phospho)	3838.7	0.017959	0.377174	4.61179	0.0191919	S(2): 24.9; T(6): 25.9; S(7): 27.2; S(15): 31.7; S(16): 31.7; S(17): 31.7; S(21): 32.0; T(24): 32.0; T(31): 33.8; S(33): 29.3
	EVQSSGKAIKTLDSWINISNLAQK	4	1	1	AT5G17990.1		2630.4
AT2G20750.1	expansin B1	10.7	1	1	1	9
	Sequence	# PSMs	# Proteins	# Protein Groups	Protein Group Accessions	Modifications	MH+ [Da]	q-Value	PEP	pRS Score	pRS Probability	pRS Site Probabilities
	GPFSVKLTTLSNNKTLSATDVIPSNWVPK	9	1	1	AT2G20750.1	S11(Phospho); T15(Phospho)	3274.63	0.022237	0.483816	11.8423	0.0696651	S(4): 6.1; T(8): 18.6; T(9): 18.6; S(11): 38.7; T(15): 25.7; S(17): 50.4; T(19): 27.3; S(24): 14.7
AT2G40840.1	disproportionating enzyme 2	14.35	1	7	9	99
	Sequence	# PSMs	# Proteins	# Protein Groups	Protein Group Accessions	Modifications	MH+ [Da]	q-Value	PEP	pRS Score	pRS Probability	pRS Site Probabilities
	YRVHVTLDSLLK	24	1	1	AT2G40840.1		1443.83	0	0.000659326
	EEYTTRPATEETINDPTNPK	32	1	1	AT2G40840.1		2306.07	0	0.0071176
	EVIGVDGIPPSQCIPEITHFILR	8	1	1	AT2G40840.1	C13(Carbamidomethyl)	2590.37	0	0.00211117
	FNIEDTSSFQDLDDHSK	4	1	1	AT2G40840.1		1997.87	0	0.000780108
	DVFDILR	8	1	1	AT2G40840.1		877.477	0.000546	0.016962
	GEVIANGSTKPNP	8	1	1	AT2G40840.1		1283.65	0.001593	0.0613274
	VEKPLGVFMNKSDQDDSVVVQFK	1	1	1	AT2G40840.1	S17(Phospho)	2689.28	0.021343	0.603115	32.6158	0.996008	S(12): 0.4; S(17): 99.6
	SVPANVSGEDINK	8	1	1	AT2G40840.1		1329.67	0.025328	0.603412
	SLLLENEDK	6	1	1	AT2G40840.1	N6(Deamidated)	1061.54
AT2G38280.1	AMP deaminase, putative / myoadenylate deaminase, putative	5.01	1	1	2	22
	Sequence	# PSMs	# Proteins	# Protein Groups	Protein Group Accessions	Modifications	MH+ [Da]	q-Value	PEP	pRS Score	pRS Probability	pRS Site Probabilities
	ALNLVLER	20	1	1	AT2G38280.1		927.563	0.016085	0.457018
	SNGHVYVDEIPPGLPRLHTPSEGRASVHGASSIR	2	1	1	AT2G38280.1	Y6(Phospho); S26(Phospho); S31(Phospho)	3832.74	0.022388	0.638191	31.7349	0.156955	S(1): 33.1; Y(6): 33.1; T(19): 33.1; S(21): 4.1; S(26): 95.3; S(31): 50.7; S(32): 50.7
AT5G23890.1	LOCATED IN: mitochondrion, chloroplast thylakoid membrane, chloroplast, plastid, chloroplast envelope; EXPRESSED IN: 24 plant structures; EXPRESSED DURING: 14 growth stages; CONTAINS InterPro DOMAIN/s: S-layer homology domain (InterPro:IPR001119); BEST Arabidopsis thaliana protein match is: unknown protein (TAIR:AT5G52410.2); Has 1807 Blast hits to 1807 proteins in 277 species: Archae - 0; Bacter…	3.28	1	1	1	1
	Sequence	# PSMs	# Proteins	# Protein Groups	Protein Group Accessions	Modifications	MH+ [Da]	q-Value	PEP	pRS Score	pRS Probability	pRS Site Probabilities
	KKSLIEGVVGAGVAGIILFLGLSYAAASFSK	1	1	1	AT5G23890.1	S28(Phospho); S30(Phospho)	3226.69	0.0239	0.464686	6.03099	0.249457	S(3): 24.9; S(23): 36.3; Y(24): 36.3; S(28): 51.2; S(30): 51.2
AT1G14610.1	valyl-tRNA synthetase / valine--tRNA ligase (VALRS)	10.47	1	3	7	39
	Sequence	# PSMs	# Proteins	# Protein Groups	Protein Group Accessions	Modifications	MH+ [Da]	q-Value	PEP	pRS Score	pRS Probability	pRS Site Probabilities
	ILQEFDFFEK	12	1	1	AT1G14610.1		1315.65	0	0.00085136
	ILTEEELER	20	1	1	AT1G14610.1		1131.59	0.000155	0.00488218
	TAISDVEVEYIDIKEKTLLK	3	1	1	AT1G14610.1	Y10(Phospho); T17(Phospho)	2467.2	0.02417	0.505546	9.92858	0.518175	T(1): 30.4; S(4): 30.4; Y(10): 62.4; T(17): 76.9
	RMSGYNALWVPGVDHAGIATQVVVEK	1	1	1	AT1G14610.1	T20(Phospho)	2877.43	0.101214	0.912947	18.9906	0.90469	S(3): 2.4; Y(5): 7.1; T(20): 90.5
	EVWKWKNQYGGTILTQLR	1	1	1	AT1G14610.1	N7(Deamidated); Q8(Deamidated)	2222.15	0.289705	1
	SFHGSRTMSESEK	1	1	1	AT1G14610.1	M8(Oxidation)	1498.66
	LEEGNLDPKEVIVAKEGQVK	1	1	1	AT1G14610.1	N5(Deamidated)	2196.18
AT4G04180.1	P-loop containing nucleoside triphosphate hydrolases superfamily protein	7.06	1	1	2	16
	Sequence	# PSMs	# Proteins	# Protein Groups	Protein Group Accessions	Modifications	MH+ [Da]	q-Value	PEP	pRS Score	pRS Probability	pRS Site Probabilities
	ITLKFQVPSTCEVAQLISNIGSQLGVK	1	1	1	AT4G04180.1	Q6(Deamidated); C11(Carbamidomethyl); Q15(Deamidated); N19(Deamidated); Q23(Deamidated)	2934.55	0.015339	0.369158
	VLSVLLRQIDGFEQEK	1	1	1	AT4G04180.1	S3(Phospho)	1954	0.227259	1	13.4607	1	S(3): 100.0
	ITLKFQVPSTCEVAQLISNIGSQLGVK	14	1	1	AT4G04180.1	Q6(Deamidated); C11(Carbamidomethyl); Q15(Deamidated); N19(Deamidated)	2933.57
AT3G62100.1	indole-3-acetic acid inducible 30	15.12	1	1	1	10
	Sequence	# PSMs	# Proteins	# Protein Groups	Protein Group Accessions	Modifications	MH+ [Da]	q-Value	PEP	pRS Score	pRS Probability	pRS Site Probabilities
	GRSSSSSSIESSCKSNPFGVSSSNTR	10	1	1	AT3G62100.1	S11(Phospho); C13(Carbamidomethyl)	2772.19	0.026131	0.525899	7.19841	0.107985	S(3): 10.8; S(4): 10.8; S(5): 10.8; S(6): 10.8; S(7): 10.8; S(8): 10.8; S(11): 10.8; S(12): 10.8; S(15): 3.7; S(21): 3.7; S(22): 2.1; S(23): 2.1; T(25): 2.1
AT3G54280.1	DNA binding;ATP binding;nucleic acid binding;binding;helicases;ATP binding;DNA binding;helicases	0.59	2	1	1	2
	Sequence	# PSMs	# Proteins	# Protein Groups	Protein Group Accessions	Modifications	MH+ [Da]	q-Value	PEP	pRS Score	pRS Probability	pRS Site Probabilities
	GTLEEKVMSLQK	2	2	1	AT3G54280.1	S9(Phospho)	1442.7	0.031178	0.473031	79.1504	1	T(2): 0.0; S(9): 100.0
AT4G38740.1	rotamase CYP 1	93.6	1	9	15	562
	Sequence	# PSMs	# Proteins	# Protein Groups	Protein Group Accessions	Modifications	MH+ [Da]	q-Value	PEP	pRS Score	pRS Probability	pRS Site Probabilities
	KHTGPGILSMANAGANTNGSQFFICTVK	15	2	2	AT4G38740.1;AT2G21130.1	M10(Oxidation); C25(Carbamidomethyl)	2937.43	0	1.96345e-14
	KHTGPGILSMANAGANTNGSQFFICTVK	32	2	2	AT4G38740.1;AT2G21130.1	C25(Carbamidomethyl)	2921.45	0	7.10243e-11
	HVVFGQVVEGLDVVK	52	2	2	AT4G38740.1;AT2G21130.1		1624.91	0	2.88015e-08
	FHRVIPNFMCQGGDFTAGNGTGGESIYGSK	48	1	1	AT4G38740.1	C10(Carbamidomethyl)	3204.46	0	2.64639e-10
	IVMELYTDKTPR	11	1	1	AT4G38740.1	M3(Oxidation)	1481.76	0	9.83598e-07
	IVMELYTDKTPR	44	1	1	AT4G38740.1		1465.77	0	0.000155606
	TDWLDGKHVVFGQVVEGLDVVK	68	2	2	AT4G38740.1;AT2G21130.1		2440.29	0	0.000177465
	ALCTGEKGVGGTGKPLHFKGSK	60	1	1	AT4G38740.1	C3(Carbamidomethyl)	2229.18	0	3.52163e-06
	VGSSSGKPTKPVVVADCGQLS	48	1	1	AT4G38740.1	C17(Carbamidomethyl)	2073.06	0	0.000193617
	AIEKVGSSSGKPTKPVVVADCGQLS	40	1	1	AT4G38740.1	C21(Carbamidomethyl)	2514.32	0	0.000226932
	HTGPGILSMANAGANTNGSQFFICTVK	7	2	2	AT4G38740.1;AT2G21130.1	M9(Oxidation); C24(Carbamidomethyl)	2809.33	0	1.16102e-06
	VYFDMTIDGQPAGR	4	1	1	AT4G38740.1		1569.74	0	0.0097658
	FHRVIPNFMCQGGDFTAGNGTGGESIYGSK	11	1	1	AT4G38740.1	M9(Oxidation); C10(Carbamidomethyl)	3220.45	0	9.9659e-07
	IVMELYTDK	4	2	2	AT4G38740.1;AT2G21130.1	M3(Oxidation)	1127.56	0	0.000871137
	GVGGTGKPLHFKGSKFHR	8	1	1	AT4G38740.1		1910.05	0	0.00477248
	VIPNFMCQGGDFTAGNGTGGESIYGSK	32	1	1	AT4G38740.1	C7(Carbamidomethyl)	2764.22	0	9.01267e-07
	VIPNFMCQGGDFTAGNGTGGESIYGSK	1	1	1	AT4G38740.1	M6(Oxidation); C7(Carbamidomethyl)	2780.22	0	0.00223079
	FHRVIPNFMCQGGDFTAGNGTGGESIYGSK	9	1	1	AT4G38740.1	C10(Carbamidomethyl); Q11(Deamidated)	3205.46	0	2.99608e-09
	FEDENFER	20	2	2	AT4G38740.1;AT2G21130.1		1085.45	0	0.000868758
	VYFDMTIDGQPAGR	3	1	1	AT4G38740.1	M5(Oxidation)	1585.73	0	6.67305e-05
	IVMELYTDK	20	2	2	AT4G38740.1;AT2G21130.1		1111.57	8e-05	0.00407922
	GVGGTGKPLHFKGSK	8	1	1	AT4G38740.1		1469.82	0.000156	0.00440548
	AIEKVGSSSGKPTKPVVVADCGQLS	1	1	1	AT4G38740.1	C21(Carbamidomethyl); Q23(Deamidated)	2515.32	0.000161	0.0106492
	VGSSSGKPTKPVVVADCGQLS	11	1	1	AT4G38740.1	C17(Carbamidomethyl); Q19(Deamidated)	2074.05	0.00119	0.0188299
	KHTGPGILSMANAGANTNGSQFFICTVK	2	2	2	AT4G38740.1;AT2G21130.1	N12(Deamidated); Q21(Deamidated); C25(Carbamidomethyl)	2923.42	0.026027	0.530901
	HTGPGILSMANAGANTNGSQFFICTVK	3	2	2	AT4G38740.1;AT2G21130.1	S8(Phospho); C24(Carbamidomethyl)	2873.3	0.027543	0.459159	36.8102	0.95062	T(2): 0.7; S(8): 95.1; T(16): 2.0; S(19): 2.0; T(25): 0.1
AT2G21130.1	Cyclophilin-like peptidyl-prolyl cis-trans isomerase family protein	68.97	1	4	10	272
	Sequence	# PSMs	# Proteins	# Protein Groups	Protein Group Accessions	Modifications	MH+ [Da]	q-Value	PEP	pRS Score	pRS Probability	pRS Site Probabilities
	KHTGPGILSMANAGANTNGSQFFICTVK	15	2	2	AT4G38740.1;AT2G21130.1	M10(Oxidation); C25(Carbamidomethyl)	2937.43	0	1.96345e-14
	KHTGPGILSMANAGANTNGSQFFICTVK	32	2	2	AT4G38740.1;AT2G21130.1	C25(Carbamidomethyl)	2921.45	0	7.10243e-11
	HVVFGQVVEGLDVVK	52	2	2	AT4G38740.1;AT2G21130.1		1624.91	0	2.88015e-08
	TDWLDGKHVVFGQVVEGLDVVK	68	2	2	AT4G38740.1;AT2G21130.1		2440.29	0	0.000177465
	HTGPGILSMANAGANTNGSQFFICTVK	7	2	2	AT4G38740.1;AT2G21130.1	M9(Oxidation); C24(Carbamidomethyl)	2809.33	0	1.16102e-06
	IVMELYTDK	4	2	2	AT4G38740.1;AT2G21130.1	M3(Oxidation)	1127.56	0	0.000871137
	IVMELYTDKTPK	1	1	1	AT2G21130.1	M3(Oxidation)	1453.76	0	0.000462642
	IGSSSGKPTKPVVIADCGEISS	24	1	1	AT2G21130.1	C17(Carbamidomethyl)	2189.11	0	0.00185103
	VFFDMTIGGAPAGK	20	1	1	AT2G21130.1		1410.71	0	3.62891e-08
	FEDENFER	20	2	2	AT4G38740.1;AT2G21130.1		1085.45	0	0.000868758
	VIPNFMCQGGDFTK	4	1	1	AT2G21130.1	C7(Carbamidomethyl)	1613.74	0	0.00168516
	IVMELYTDK	20	2	2	AT4G38740.1;AT2G21130.1		1111.57	8e-05	0.00407922
	KHTGPGILSMANAGANTNGSQFFICTVK	2	2	2	AT4G38740.1;AT2G21130.1	N12(Deamidated); Q21(Deamidated); C25(Carbamidomethyl)	2923.42	0.026027	0.530901
	HTGPGILSMANAGANTNGSQFFICTVK	3	2	2	AT4G38740.1;AT2G21130.1	S8(Phospho); C24(Carbamidomethyl)	2873.3	0.027543	0.459159	36.8102	0.95062	T(2): 0.7; S(8): 95.1; T(16): 2.0; S(19): 2.0; T(25): 0.1
AT1G56710.1	Pectin lyase-like superfamily protein	10.14	1	1	1	2
	Sequence	# PSMs	# Proteins	# Protein Groups	Protein Group Accessions	Modifications	MH+ [Da]	q-Value	PEP	pRS Score	pRS Probability	pRS Site Probabilities
	NVTCGPSHGISIGSLGVHNSQAYVSNITVTNSTIWNSDNGVRIK	2	1	1	AT1G56710.1	T3(Phospho); C4(Carbamidomethyl); T33(Phospho); S37(Phospho)	4894.2	0.027961	0.543715			Too many isoforms
AT3G42850.1	Mevalonate/galactokinase family protein	5.39	1	1	2	19
	Sequence	# PSMs	# Proteins	# Protein Groups	Protein Group Accessions	Modifications	MH+ [Da]	q-Value	PEP	pRS Score	pRS Probability	pRS Site Probabilities
	HAEARHHSRDTPILEIVSFGSELSNR	18	1	1	AT3G42850.1	S8(Phospho)	3038.44	0.028666	0.74533	2.98942e-14	0.195963	S(8): 19.6; T(11): 19.6; S(18): 19.9; S(21): 19.9; S(24): 21.1
	RELGVPDNVKLLIFNFGGQPTGWTLK	1	1	1	AT3G42850.1	T21(Phospho)	2979.53	0.627986	1	2.61925	0.386006	T(21): 38.6; T(24): 61.4
AT4G23670.1	Polyketide cyclase/dehydrase and lipid transport superfamily protein	89.4	7	18	19	1064
	Sequence	# PSMs	# Proteins	# Protein Groups	Protein Group Accessions	Modifications	MH+ [Da]	q-Value	PEP	pRS Score	pRS Probability	pRS Site Probabilities
	VFDIIYEFIPK	88	1	1	AT4G23670.1		1383.76	0	1.95505e-07
	SENHVFADAIGHHIQNVVVHEGEHDSHGSIR	156	1	1	AT4G23670.1		3427.62	0	4.24358e-05
	RNDDFPEPSGYMK	7	1	1	AT4G23670.1	M12(Oxidation)	1571.68	0	2.18365e-06
	QMVVDIEGHVNKA	20	1	1	AT4G23670.1	M2(Oxidation)	1455.72	0	1.66261e-05
	QMVVDIEGHVNKA	72	1	1	AT4G23670.1		1439.73	0	0.00013083
	GLDGHVMEHLKVFDIIYEFIPK	112	1	1	AT4G23670.1		2600.36	0	6.43448e-09
	NDDFPEPSGYMK	40	1	1	AT4G23670.1		1399.58	0	7.85435e-05
	RGLDGHVMEHLKVFDIIYEFIPK	64	1	1	AT4G23670.1		2756.45	0	1.58152e-07
	NDDFPEPSGYMK	6	1	1	AT4G23670.1	M11(Oxidation)	1415.58	0	5.07407e-05
	SWKSENHVFADAIGHHIQNVVVHEGEHDSHGSIR	88	1	1	AT4G23670.1		3828.83	0	9.74386e-10
	RNDDFPEPSGYMK	56	1	1	AT4G23670.1		1555.68	0	0.000222795
	QMVVDIEGHVNK	32	1	1	AT4G23670.1		1368.69	0	1.49156e-05
	GLDGHVMEHLK	48	1	1	AT4G23670.1		1235.62	0	0.000567826
	GLDGHVMEHLK	12	1	1	AT4G23670.1	M7(Oxidation)	1251.61	0	0.000269271
	RGLDGHVMEHLK	9	1	1	AT4G23670.1	M8(Oxidation)	1407.71	0	0.000667841
	RGLDGHVMEHLK	32	1	1	AT4G23670.1		1391.72	0	4.54681e-07
	EIDDENKTLTKR	44	1	1	AT4G23670.1		1461.75	0	0.00822465
	RGLDGHVMEHLKVFDIIYEFIPK	10	1	1	AT4G23670.1	M8(Oxidation)	2772.45	0	5.70044e-06
	FVKQMVVDIEGHVNKA	40	1	1	AT4G23670.1		1813.96	0	4.49526e-16
	GLDGHVMEHLKVFDIIYEFIPK	8	1	1	AT4G23670.1	M7(Oxidation)	2616.35	0	0.000128066
	FVKQMVVDIEGHVNKA	9	1	1	AT4G23670.1	M5(Oxidation)	1829.95	0	4.33011e-05
	ATSGTYVTEVPLKGSAEKHYK	9	3	1	AT4G23670.1	N-Term(Acetyl)	2308.18	0	6.71391e-06
	ATSGTYVTEVPLKGSAEK	9	4	1	AT4G23670.1	N-Term(Acetyl)	1879.96	0	3.45282e-07
	SENHVFADAIGHHIQNVVVHEGEHDSHGSIR	3	1	1	AT4G23670.1	Q15(Deamidated); N16(Deamidated)	3429.59	0	8.55463e-06
	SWKSENHVFADAIGHHIQNVVVHEGEHDSHGSIR	18	1	1	AT4G23670.1	N6(Deamidated)	3829.84	0	0.000390282
	SWDYTYDGKK	16	1	1	AT4G23670.1		1262.57	0	0.00429625
	ATSGTYVTEVPLK	1	7	1	AT4G23670.1	N-Term(Acetyl)	1407.73	0	0.000931854
	SENHVFADAIGHHIQNVVVHEGEHDSHGSIR	18	1	1	AT4G23670.1	N16(Deamidated)	3428.63	0	1.4761e-09
	EIDDENKTLTK	8	1	1	AT4G23670.1		1305.65	0.000657	0.0087409
	ITMIWEK	24	5	2	AT4G23670.1;AT3G26450.1		920.491	0.001985	0.0645156
	ATSGTYVTEVPLKGSAEK	4	4	1	AT4G23670.1	T2(Phospho)	1917.91	0.032722	0.492388	48.1384	0.24524	T(2): 24.5; S(3): 24.5; T(5): 24.5; Y(6): 24.5; T(8): 1.9; S(15): 0.0
	QMVVDIEGHVNKA	1	1	1	AT4G23670.1	N11(Deamidated)	1440.72
AT4G21620.1	glycine-rich protein	35.11	1	1	1	2
	Sequence	# PSMs	# Proteins	# Protein Groups	Protein Group Accessions	Modifications	MH+ [Da]	q-Value	PEP	pRS Score	pRS Probability	pRS Site Probabilities
	SGNDGLGFGGVPGSGFIPGFGNGFPGTGVGGGYGGGFGGPSGGFGK	2	1	1	AT4G21620.1	S1(Phospho); S41(Phospho)	4181.81	0.033473	0.49741	0.012941	0.0996527	S(1): 40.3; S(14): 40.0; T(27): 40.2; Y(33): 39.8; S(41): 39.8
AT2G35040.2	AICARFT/IMPCHase bienzyme family protein	34.68	2	12	13	206
	Sequence	# PSMs	# Proteins	# Protein Groups	Protein Group Accessions	Modifications	MH+ [Da]	q-Value	PEP	pRS Score	pRS Probability	pRS Site Probabilities
	YGVSLLFTNVR	24	2	1	AT2G35040.2		1268.7	0	0.00050323
	VKTLHPNIHGGILAR	24	2	1	AT2G35040.2		1625.96	0	3.64402e-05
	LTHFPEMLDGR	28	2	1	AT2G35040.2		1315.65	0	0.000239932
	VTAPGGISFEDGIENIDIGGPAMIR	8	2	1	AT2G35040.2		2529.26	0	0.0017535
	TLHPNIHGGILAR	24	2	1	AT2G35040.2		1398.8	0	0.000721127
	DLASLGNGLQELGYTIVSTGGTASTLENAGVSVTK	24	2	1	AT2G35040.2		3423.75	0	8.63062e-06
	MFYEIVVAPK	12	2	1	AT2G35040.2		1196.64	0	0.000726555
	GAALASDAFFPFAWK	20	2	1	AT2G35040.2		1598.8	0	4.65395e-05
	DAVEEACQMGIGVIAEPGGSIR	12	2	1	AT2G35040.2	C7(Carbamidomethyl)	2259.07	0	0.00167721
	YGVSLLFTNVRHFRH	16	2	1	AT2G35040.2		1845.99	0.003802	0.121577
	SLAEVNAGGIATAIQHHGK	8	2	1	AT2G35040.2		1873.99	0.004592	0.203794
	DLASLGNGLQELGYTIVSTGGTASTLENAGVSVTKVEK	1	2	1	AT2G35040.2	S4(Phospho); T15(Phospho); S18(Phospho)	4019.86	0.033784	0.783906	0.00819022	0.00802068	S(4): 29.8; Y(14): 30.8; T(15): 29.9; S(18): 30.7; T(19): 29.9; T(22): 29.5; S(24): 29.5; T(25): 29.7; S(32): 30.5; T(34): 29.7
	DLASLGNGLQELGYTIVSTGGTASTLENAGVSVTK	2	2	1	AT2G35040.2	N28(Deamidated)	3424.75	0.062853	0.772329
	NNCMLGMGSGQPNRVESLR	3	2	1	AT2G35040.2	C3(Carbamidomethyl); Q11(Deamidated); N13(Deamidated)	2121.93	0.14696	1
AT5G02460.1	Dof-type zinc finger DNA-binding family protein	11.03	1	1	1	5
	Sequence	# PSMs	# Proteins	# Protein Groups	Protein Group Accessions	Modifications	MH+ [Da]	q-Value	PEP	pRS Score	pRS Probability	pRS Site Probabilities
	LMPPLDFTDNFTLQYGAVSAPSYHIGGGSSGGAAALLNGFDQWR	5	1	1	AT5G02460.1	T12(Phospho); Y15(Phospho)	4759.12	0.03584	0.567325	1.24818	0.0357143	T(8): 25.0; T(12): 25.0; Y(15): 25.0; S(19): 25.0; S(22): 25.0; Y(23): 25.0; S(29): 25.0; S(30): 25.0
AT4G18501.1	unknown protein; Has 35333 Blast hits to 34131 proteins in 2444 species: Archae - 798; Bacteria - 22429; Metazoa - 974; Fungi - 991; Plants - 531; Viruses - 0; Other Eukaryotes - 9610 (source: NCBI BLink).	21.1	1	1	1	3
	Sequence	# PSMs	# Proteins	# Protein Groups	Protein Group Accessions	Modifications	MH+ [Da]	q-Value	PEP	pRS Score	pRS Probability	pRS Site Probabilities
	KPLQDITNLFVSSSPLSSSFLIR	3	1	1	AT4G18501.1	S17(Phospho)	2629.36	0.036814	0.573834	7.60924	0.169112	T(7): 3.4; S(12): 9.4; S(13): 9.4; S(14): 9.4; S(17): 16.9; S(18): 16.9; S(19): 34.6
AT1G32320.1	MAP kinase kinase 10	11.15	1	1	1	3
	Sequence	# PSMs	# Proteins	# Protein Groups	Protein Group Accessions	Modifications	MH+ [Da]	q-Value	PEP	pRS Score	pRS Probability	pRS Site Probabilities
	GSLHDALLAQQVFSEPMVSSLANRILQGLRYLQK	3	1	1	AT1G32320.1	S2(Phospho); S19(Phospho)	3942.96	0.038116	0.795732	7.93588	0.0774667	S(2): 83.1; S(14): 13.7; S(19): 13.0; S(20): 13.0; Y(31): 77.3
AT1G02780.1	Ribosomal protein L19e family protein	25.7	2	2	5	173
	Sequence	# PSMs	# Proteins	# Protein Groups	Protein Group Accessions	Modifications	MH+ [Da]	q-Value	PEP	pRS Score	pRS Probability	pRS Site Probabilities
	GPGGDVAPVAAPAPAATPAPTAAVPK	64	1	1	AT1G02780.1		2251.2	0	6.32989e-08
	EKTLSDQFEAKR	16	2	2	AT1G02780.1;AT4G02230.1		1451.75	0	0.022155
	LAKGPGGDVAPVAAPAPAATPAPTAAVPK	40	1	1	AT1G02780.1		2563.41	0	3.98757e-05
	DGFIIRKPTKIHSR	48	3	2	AT1G02780.1;AT4G02230.1		1667.97	0	3.99453e-05
	EKTLSDQFEAK	4	2	2	AT1G02780.1;AT4G02230.1		1295.64	0	0.00324917
	LAKGPGGDVAPVAAPAPAATPAPTAAVPK	1	1	1	AT1G02780.1	T20(Phospho)	2643.39	0.039518	0.516835	11.7492	0.7706	T(20): 77.1; T(24): 22.9
AT5G60600.3	4-hydroxy-3-methylbut-2-enyl diphosphate synthase	22.32	3	12	12	185
	Sequence	# PSMs	# Proteins	# Protein Groups	Protein Group Accessions	Modifications	MH+ [Da]	q-Value	PEP	pRS Score	pRS Probability	pRS Site Probabilities
	AQFETIDYTEDEYQK	28	3	1	AT5G60600.3		1879.82	0	6.81025e-08
	TLFDLQEISAEIR	8	3	1	AT5G60600.3		1534.81	0	8.34928e-08
	LVVGMPFKDLATVDSILLR	16	3	1	AT5G60600.3		2087.2	0	3.22818e-06
	DKLVQLNYNIPLVADIHFAPTVALR	28	3	1	AT5G60600.3		2820.58	0	2.09537e-06
	HRHYFDFQR	8	3	1	AT5G60600.3		1305.62	0	0.0002882
	QKYCESLHKTVR	24	3	1	AT5G60600.3	C4(Carbamidomethyl)	1548.79	0	0.00204583
	LVQLNYNIPLVADIHFAPTVALR	9	3	1	AT5G60600.3	N7(Deamidated)	2578.45	0	0.000460569
	LVQLNYNIPLVADIHFAPTVALR	32	3	1	AT5G60600.3		2577.45	0	2.92332e-10
	DITGTVDEVMR	8	3	1	AT5G60600.3		1235.59	0	0.000969069
	DKLVQLNYNIPLVADIHFAPTVALR	3	3	1	AT5G60600.3	N9(Deamidated)	2821.57	0	4.04569e-05
	IRVNPGNFADRR	12	3	1	AT5G60600.3		1414.77	0.000573	0.0167277
	IADKGADIVR	4	3	1	AT5G60600.3		1057.6	0.002172	0.0528205
	LQQGVAPFEEK	4	2	1	AT5G60600.3		1245.65	0.005268	0.170701
	ATGVLPAPVSGIKIPDSKVGFGK	1	3	1	AT5G60600.3	T2(Phospho); S10(Phospho); S17(Phospho)	2478.18	0.040457	0.535816	18.8883	1	T(2): 100.0; S(10): 100.0; S(17): 100.0
AT5G05890.1	UDP-Glycosyltransferase superfamily protein	9.01	1	1	1	4
	Sequence	# PSMs	# Proteins	# Protein Groups	Protein Group Accessions	Modifications	MH+ [Da]	q-Value	PEP	pRS Score	pRS Probability	pRS Site Probabilities
	WAPQQDVLKHRAIGGFLTHNGWSSTVESVCEAVPMICLPFR	4	1	1	AT5G05890.1	S23(Phospho); C30(Carbamidomethyl); C37(Carbamidomethyl)	4774.29	0.042016	0.795732	2.41082e-14	0.2	T(18): 20.0; S(23): 20.0; S(24): 20.0; T(25): 20.0; S(28): 20.0
AT1G51120.1	AP2/B3 transcription factor family protein	10.51	1	1	1	2
	Sequence	# PSMs	# Proteins	# Protein Groups	Protein Group Accessions	Modifications	MH+ [Da]	q-Value	PEP	pRS Score	pRS Probability	pRS Site Probabilities
	TTTETSGLTDSVLSLTKRMKPTEVTTTTKPALSNTTK	2	1	1	AT1G51120.1	T1(Phospho); T2(Phospho); T3(Phospho); T28(Phospho); S33(Phospho); T35(Phospho); T36(Phospho)	4499.82	0.043542	0.536938			Too many isoforms
AT2G33210.1	heat shock protein 60-2	35.73	2	8	14	334
	Sequence	# PSMs	# Proteins	# Protein Groups	Protein Group Accessions	Modifications	MH+ [Da]	q-Value	PEP	pRS Score	pRS Probability	pRS Site Probabilities
	QVANATNDVAGDGTTCATVLTR	64	3	2	AT3G23990.1;AT2G33210.1	C16(Carbamidomethyl)	2235.06	0	7.08582e-12
	LLEQDNPDLGYDAAK	24	3	2	AT3G23990.1;AT2G33210.1		1661.8	0	4.9814e-06
	AAVEEGIVPGGGVALLYASK	24	2	1	AT2G33210.1		1901.03	0	0.000418699
	TLFNELEVVEGMK	32	3	2	AT3G23990.1;AT2G33210.1		1508.77	0	1.12586e-06
	SVAAGMNAMDLR	7	3	2	AT3G23990.1;AT2G33210.1	M6(Oxidation); M9(Oxidation)	1267.57	0	5.10261e-05
	GVEDLADAVK	24	3	2	AT3G23990.1;AT2G33210.1		1016.53	0	6.93701e-05
	QRPLLIVAEDVESDALATLILNKLR	36	2	1	AT2G33210.1		2790.61	0	8.10057e-05
	TALVDAASVSSLLTTTEAVVTEIPTK	44	2	1	AT2G33210.1		2617.42	0	5.83456e-08
	IGVQIIQNALK	24	3	2	AT3G23990.1;AT2G33210.1		1196.74	0	5.38377e-05
	IGVQIIQNALKTPVYTIASNAGVEGAVVVGK	16	2	1	AT2G33210.1		3109.75	0	0.00135495
	QRPLLIVAEDVESDALATLILNK	16	2	1	AT2G33210.1		2521.42	0	0.00620856
	SVAAGMNAMDLR	4	3	2	AT3G23990.1;AT2G33210.1		1235.59	0	0.000408953
	ANIKVCAVKAPGFGENR	4	1	1	AT2G33210.1	C6(Carbamidomethyl)	1830.96	0	0.000325968
	QRPLLIVAEDVESDALATLILNK	2	2	1	AT2G33210.1	Q1(Deamidated)	2522.42	0.000414	0.0161898
	QVANATNDVAGDGTTCATVLTR	3	3	2	AT3G23990.1;AT2G33210.1	Q1(Deamidated); C16(Carbamidomethyl)	2236.06	0.000836	0.0259315
	ISNINAMVK	6	2	1	AT2G33210.1	M7(Oxidation)	1005.54	0.001591	0.051295
	VTDALNATKAAVEEGIVPGGGVALLYASK	2	2	1	AT2G33210.1	Y26(Phospho)	2894.5	0.043878	0.659459	3.34085	0.257784	T(2): 12.3; T(8): 17.4; Y(26): 25.8; S(28): 44.5
	IGVQIIQNALK	2	3	2	AT3G23990.1;AT2G33210.1	Q4(Deamidated); Q7(Deamidated)	1198.71
AT1G70200.1	RNA-binding (RRM/RBD/RNP motifs) family protein	3.16	1	1	1	4
	Sequence	# PSMs	# Proteins	# Protein Groups	Protein Group Accessions	Modifications	MH+ [Da]	q-Value	PEP	pRS Score	pRS Probability	pRS Site Probabilities
	QFTGQSLAFGKVIKQIK	4	1	1	AT1G70200.1	S6(Phospho)	1973.05	0.047422	0.652238	34.9581	0.134772	T(3): 86.5; S(6): 13.5
AT5G57590.1	adenosylmethionine-8-amino-7-oxononanoate transaminases	8.4	1	1	4	8
	Sequence	# PSMs	# Proteins	# Protein Groups	Protein Group Accessions	Modifications	MH+ [Da]	q-Value	PEP	pRS Score	pRS Probability	pRS Site Probabilities
	SLLIMLR	5	1	1	AT5G57590.1		845.526	0.00425	0.152673
	FGHVMFPENVYEPALKCAELLLDGVGKGWASR	1	1	1	AT5G57590.1	C17(Carbamidomethyl); S31(Phospho)	3670.77	0.048751	0.6902	2.91047	0.661465	Y(11): 33.9; S(31): 66.1
	LLYLKPIQTGFPSDSDSRFVFSK	1	1	1	AT5G57590.1	T9(Phospho); S15(Phospho)	2805.35	0.501444	1	14.7696	0.147296	Y(3): 48.3; T(9): 48.3; S(13): 31.9; S(15): 31.9; S(17): 31.9; S(22): 7.8
	LLTKLYKR	1	1	1	AT5G57590.1	Y6(Phospho)	1114.65			57.3032	0.998578	T(3): 0.1; Y(6): 99.9

## Sheet: 40 % AS
Accession	Description	ΣCoverage	Σ# Proteins	Σ# Unique Peptides	Σ# Peptides	Σ# PSMs	MH+ [Da]	q-Value	PEP	pRS Score	pRS Probability	pRS Site Probabilities
AT5G61210.1	soluble N-ethylmaleimide-sensitive factor adaptor protein 33	8	1	1	1	3
	Sequence	# PSMs	# Proteins	# Protein Groups	Protein Group Accessions	Modifications	MH+ [Da]	q-Value	PEP	pRS Score	pRS Probability	pRS Site Probabilities
	SSKPNPFDSDDESDNKHTLNPSKR	3	1	1	AT5G61210.1	S9(Phospho)	2795.22	0	3.14691e-05	25.2878	0.829198	S(1): 5.7; S(2): 5.7; S(9): 82.9; S(13): 1.9; T(18): 1.9; S(22): 1.9
AT5G55230.1	microtubule-associated proteins 65-1	24.19	2	8	8	71
	Sequence	# PSMs	# Proteins	# Protein Groups	Protein Group Accessions	Modifications	MH+ [Da]	q-Value	PEP	pRS Score	pRS Probability	pRS Site Probabilities
	IMSLIDSGNVEPTELLADMDSQISK	16	2	1	AT5G55230.1		2706.32	0	0.000625617
	DLIEQAEVEVDRLDQLK	20	1	1	AT5G55230.1		2013.05	0	0.00129298
	KVQEQPHVEQESAFSTRPSPARPVSAK	4	2	1	AT5G55230.1		2990.54	0	4.97739e-05
	ETLNRPAAPTNYVAISK	8	2	1	AT5G55230.1		1844.98	0	0.00104393
	EEAASSPVSGAADHQVPASP	1	2	1	AT5G55230.1	S19(Phospho)	1986.84	0	0.000180672	74.2606	0.999991	S(5): 0.0; S(6): 0.0; S(9): 0.0; S(19): 100.0
	AELLQTLSDANAELSSLTMSLGDK	8	2	1	AT5G55230.1		2507.25	0	3.43907e-07
	IPAMVDTLVAK	8	2	1	AT5G55230.1		1157.66	7.5e-05	0.000835539
	KVQEQPHVEQESAFSTRPSPARPVSAKK	4	2	1	AT5G55230.1		3118.63	9.2e-05	0.00193392
	KVQEQPHVEQESAFSTRPSPARPVSAKK	1	2	1	AT5G55230.1	Q10(Deamidated)	3119.63	0.000237	0.00491627
	IMSLIDSGNVEPTELLADMDSQISK	1	2	1	AT5G55230.1	N9(Deamidated)	2707.32	0.004346	0.0879367
AT5G53620.1	unknown protein; INVOLVED IN: biological_process unknown; EXPRESSED IN: 23 plant structures; EXPRESSED DURING: 13 growth stages; Has 28929 Blast hits to 19542 proteins in 1425 species: Archae - 211; Bacteria - 3079; Metazoa - 14558; Fungi - 2157; Plants - 966; Viruses - 80; Other Eukaryotes - 7878 (source: NCBI BLink).	20.23	1	5	6	114
	Sequence	# PSMs	# Proteins	# Protein Groups	Protein Group Accessions	Modifications	MH+ [Da]	q-Value	PEP	pRS Score	pRS Probability	pRS Site Probabilities
	LDSHSQNQKPEELNGQVSPDEHSGAK	48	1	1	AT5G53620.1		2831.31	0	3.98665e-07
	LHVHTVQQLQQELANVR	16	1	1	AT5G53620.1		2013.1	0	3.4689e-06
	LDSHSQNQKPEELNGQVSPDEHSGAK	9	1	1	AT5G53620.1	S18(Phospho)	2911.28	0	7.47527e-05	32.9461	0.963037	S(3): 0.1; S(5): 0.1; S(18): 96.3; S(23): 3.5
	TNSGGASQTIQNSGNQFDAHGNSAESANISVHSNGK	9	1	1	AT5G53620.1	N15(Deamidated)	3587.61	0	1.12021e-06
	TNSGGASQTIQNSGNQFDAHGNSAESANISVHSNGK	4	1	1	AT5G53620.1		3586.62	0	4.23343e-05
	METAASSVATTR	3	1	1	AT5G53620.1	N-Term(Acetyl)	1266.6	0	0.0006606
	SLLTCILR	12	1	1	AT5G53620.1	C5(Carbamidomethyl)	975.565	0.000147	0.00570842
	LDSHSQNQKPEELNGQVSPDEHSGAK	5	1	1	AT5G53620.1	Q16(Deamidated)	2832.31	0.001387	0.0224841
	LDSHSQNQKPEELNGQVSPDEHSGAK	6	1	1	AT5G53620.1	N7(Deamidated); N14(Deamidated)	2833.3	0.00162	0.0324236
	MVAASAAAAKVAAAAAASSSPNSIYVAMTPMAQSQGLKK	2	1	1	AT5G53620.1	S5(Phospho); S18(Phospho); S19(Phospho)	3961.82	0.433189	1	0.664113	0.0182296	S(5): 44.8; S(18): 35.1; S(19): 35.1; S(20): 35.1; S(23): 35.2; Y(25): 37.6; T(29): 36.4; S(34): 40.7
AT5G52310.1	low-temperature-responsive protein 78 (LTI78) / desiccation-responsive protein 29A (RD29A)	81.83	1	39	40	1992
	Sequence	# PSMs	# Proteins	# Protein Groups	Protein Group Accessions	Modifications	MH+ [Da]	q-Value	PEP	pRS Score	pRS Probability	pRS Site Probabilities
	LPISGGGSGVEEQR	24	1	1	AT5G52310.1		1385.7	0	1.33355e-09
	HGQSNEHEQDHDLVEEDDDDDELEPEVIDAPGVTGKPR	56	1	1	AT5G52310.1		4265.85	0	5.68924e-14
	NEYSPESDGGLGAPLGGNFPVR	64	1	1	AT5G52310.1		2233.05	0	1.05176e-11
	TESGNDKNSPMGFGSESGAELEK	48	1	1	AT5G52310.1		2371.03	0	2.34433e-10
	EETGGVPEIAESFGNMEVTDESPDQKPGQFER	72	1	1	AT5G52310.1		3509.56	0	3.06295e-10
	DQETESAVTTKLPISGGGSGVEEQR	108	1	1	AT5G52310.1		2575.25	0	9.67558e-07
	IKGWFGGGATDEVKPESPHSVEEAPK	84	1	1	AT5G52310.1		2752.35	0	3.22153e-11
	TESGNDKNSPMGFGSESGAELEK	8	1	1	AT5G52310.1	M11(Oxidation)	2387.02	0	1.71907e-10
	NSPMGFGSESGAELEK	24	1	1	AT5G52310.1		1639.72	0	1.93437e-08
	ETHHESLNTPVSLLSGTEDVTSTFAPSGDDEYLDGQR	64	1	1	AT5G52310.1		4004.82	0	3.6592e-16
	DSPAKFPGESGVVFPVGFGDESGAELEK	80	1	1	AT5G52310.1		2852.36	0	2.31701e-07
	ETHHESLNTPVSLLSGTEDVTSTFAPSGDDEYLDGQRK	24	1	1	AT5G52310.1		4132.92	0	3.35604e-08
	SSGWFGGGATEEVKPK	48	1	1	AT5G52310.1		1636.79	0	5.76465e-07
	KVNVETPITLEEESAVSDYLSGVSNYQSK	68	1	1	AT5G52310.1		3186.57	0	2.51169e-07
	TETLDQFSPELSHPK	84	1	1	AT5G52310.1		1728.84	0	1.59857e-07
	FPGESGVVFPVGFGDESGAELEK	68	1	1	AT5G52310.1		2354.11	0	4.57585e-07
	NSPMGFGSESGAELEK	6	1	1	AT5G52310.1	M4(Oxidation)	1655.72	0	3.73123e-07
	AASEEGEAVEEEVK	28	1	1	AT5G52310.1		1476.67	0	1.4609e-07
	GRPGYGEASEEDKFPAR	116	1	1	AT5G52310.1		1865.88	0	6.36802e-07
	FASMLGYSGEIPVGDQTQVAGTVDEK	76	1	1	AT5G52310.1		2699.28	0	3.6592e-16
	EFDQDFDSVLGK	28	1	1	AT5G52310.1		1399.64	0	1.24958e-05
	SDDVEVETELGR	24	1	1	AT5G52310.1		1348.62	0	3.6592e-16
	GWFGGGATDEVKPESPHSVEEAPK	20	1	1	AT5G52310.1		2511.17	0	0.000133902
	EETGGVPEIAESFGNMEVTDESPDQKPGQFER	8	1	1	AT5G52310.1	M16(Oxidation)	3525.55	0	5.35165e-09
	VTDPTKEETGGVPEIAESFGNMEVTDESPDQKPGQFER	56	1	1	AT5G52310.1		4150.9	0	5.11612e-09
	VNVETPITLEEESAVSDYLSGVSNYQSK	48	1	1	AT5G52310.1		3058.47	0	0.000120013
	ETNVPASEEIIPPGTK	72	1	1	AT5G52310.1		1681.86	0	6.93204e-06
	VFPVVSSDYTKPTESVPVQEASYGHDAPAHSVR	60	1	1	AT5G52310.1		3556.72	0	3.6592e-16
	SPHSVEESPQSLGSTVVPVQK	48	1	1	AT5G52310.1		2192.12	0	1.01764e-07
	RDVPIHHPLSELSDR	24	1	1	AT5G52310.1		1770.92	0	1.13483e-06
	SDDVEVETELGRDPK	52	1	1	AT5G52310.1		1688.8	0	6.71533e-05
	NESDIDKDVPTGFDGEPDFLAK	28	1	1	AT5G52310.1		2409.11	0	2.39586e-07
	DVPTGFDGEPDFLAK	48	1	1	AT5G52310.1		1607.76	0	1.30933e-15
	DVPIHHPLSELSDR	64	1	1	AT5G52310.1		1614.82	0	5.76491e-05
	VTDPTKEETGGVPEIAESFGNMEVTDESPDQKPGQFER	3	1	1	AT5G52310.1	M22(Oxidation)	4166.91	0	2.49728e-07
	AASEEGEAVEEEVKGGGGMVGR	24	1	1	AT5G52310.1		2147.98	0	1.75726e-06
	MDQTEEPPLNTHQQHPEEVEHHENGATK	17	1	1	AT5G52310.1	N-Term(Acetyl)	3304.44	0	2.27614e-08
	IKGWFGGGATDEVKPESPHSVEEAPK	14	1	1	AT5G52310.1	S17(Phospho)	2832.32	0	0.00015799	59.637	0.986746	T(10): 0.0; S(17): 98.7; S(20): 1.3
	VNVETPITLEEESAVSDYLSGVSNYQSK	15	1	1	AT5G52310.1	N2(Deamidated)	3059.44	0	9.82166e-06
	EETGGVPEIAESFGNMEVTDESPDQKPGQFER	6	1	1	AT5G52310.1	N15(Deamidated)	3510.56	0	1.84806e-09
	VTDPTKEETGGVPEIAESFGNMEVTDESPDQKPGQFER	12	1	1	AT5G52310.1	N21(Deamidated); Q31(Deamidated)	4152.89	0	3.27879e-07
	HGQSNEHEQDHDLVEEDDDDDELEPEVIDAPGVTGKPR	21	1	1	AT5G52310.1	Q3(Deamidated)	4266.86	0	2.46969e-07
	FASMLGYSGEIPVGDQTQVAGTVDEK	6	1	1	AT5G52310.1	M4(Oxidation)	2715.29	0	1.07136e-09
	SPHSVEESPQSLGSTVVPVQK	10	1	1	AT5G52310.1	S1(Phospho)	2272.09	0	0.000239707	125.713	0.992623	S(1): 99.3; S(4): 0.7; S(8): 0.0; S(11): 0.0; S(14): 0.0; T(15): 0.0
	GWFGGGATDEVKPESPHSVEEAPK	6	1	1	AT5G52310.1	S15(Phospho)	2591.14	0	7.25676e-05	54.7494	0.946707	T(8): 0.4; S(15): 94.7; S(18): 5.0
	VFPVVSSDYTKPTESVPVQEASYGHDAPAHSVR	1	1	1	AT5G52310.1	Q19(Deamidated)	3557.74	0	1.09256e-07
	VTDPTKEETGGVPEIAESFGNMEVTDESPDQKPGQFER	6	1	1	AT5G52310.1	Q31(Deamidated)	4151.89	0	1.33652e-07
	DQETESAVTTKLPISGGGSGVEEQR	10	1	1	AT5G52310.1	Q24(Deamidated)	2576.24	0	2.51153e-06
	KVNVETPITLEEESAVSDYLSGVSNYQSK	5	1	1	AT5G52310.1	N3(Deamidated); Q27(Deamidated)	3188.54	0	0.00376113
	TETGMDTNSPSR	8	1	1	AT5G52310.1		1295.55	0	0.000111298
	ETHHESLNTPVSLLSGTEDVTSTFAPSGDDEYLDGQR	6	1	1	AT5G52310.1	Q36(Deamidated)	4005.82	0	1.58554e-06
	HGQSNEHEQDHDLVEEDDDDDELEPEVIDAPGVTGKPR	6	1	1	AT5G52310.1	N5(Deamidated); Q9(Deamidated)	4267.84	0	5.63478e-08
	FASMLGYSGEIPVGDQTQVAGTVDEK	2	1	1	AT5G52310.1	Q18(Deamidated)	2700.28	0	0.00269135
	ETHHESLNTPVSLLSGTEDVTSTFAPSGDDEYLDGQRK	4	1	1	AT5G52310.1	Q36(Deamidated)	4133.92	0	2.21169e-08
	TESGNDKNSPMGFGSESGAELEK	6	1	1	AT5G52310.1	N8(Deamidated)	2372.02	0	8.64688e-06
	KVNVETPITLEEESAVSDYLSGVSNYQSK	14	1	1	AT5G52310.1	N3(Deamidated)	3187.57	0	3.39337e-05
	SHELDLK	20	1	1	AT5G52310.1		841.441	9.2e-05	0.00173642
	TETGMDTNSPSR	1	1	1	AT5G52310.1	M5(Oxidation)	1311.54	9.4e-05	0.000905687
	TETLDQFSPELSHPK	1	1	1	AT5G52310.1	Q6(Deamidated)	1729.82	0.000103	0.00137088
	AFSDMVAEK	8	1	1	AT5G52310.1		997.468	0.000162	0.00217999
	SHEFDLK	12	3	2	AT5G52300.1;AT5G52310.1		875.425	0.000181	0.00587507
	DQETESAVTTK	4	1	1	AT5G52310.1		1208.56	0.000644	0.0124884
	DEKTEEPKQSTYTEK	4	1	1	AT5G52310.1		1812.85	0.002845	0.0571877
	EETGGVPEIAESFGNMEVTDESPDQKPGQFER	2	1	1	AT5G52310.1	N15(Deamidated); Q25(Deamidated); Q29(Deamidated)	3512.5	0.002935	0.0574732
	ETHHESLNTPVSLLSGTEDVTSTFAPSGDDEYLDGQR	1	1	1	AT5G52310.1	N8(Deamidated); Q36(Deamidated)	4006.8	0.003393	0.0931975
	SHDFDMK	4	1	1	AT5G52310.1		879.365	0.008478	0.213306
	VNVETPITLEEESAVSDYLSGVSNYQSK	3	1	1	AT5G52310.1	N2(Deamidated); N24(Deamidated)	3060.46	0.041503	0.584452
AT5G04430.1	binding to TOMV RNA 1L (long form)	11.82	2	3	3	79
	Sequence	# PSMs	# Proteins	# Protein Groups	Protein Group Accessions	Modifications	MH+ [Da]	q-Value	PEP	pRS Score	pRS Probability	pRS Site Probabilities
	RSPEPHDSSEADSAEKPTHIR	40	2	1	AT5G04430.1		2346.1	0	2.25156e-05
	RSPEPHDSSEADSAEKPTHIR	10	2	1	AT5G04430.1	S2(Phospho)	2426.07	0	9.57002e-06	46.3792	0.980662	S(2): 98.1; S(8): 1.0; S(9): 1.0; S(13): 0.0; T(18): 0.0
	LHSELHAEDGNEVEPR	24	2	1	AT5G04430.1		1831.85	0	5.77146e-06
	SPEPHDSSEADSAEKPTHIR	5	2	1	AT5G04430.1	S1(Phospho)	2269.96	0.001774	0.0416669	1.69725	0.105231	S(1): 10.5; S(7): 17.6; S(8): 17.6; S(12): 36.6; T(17): 17.6
AT4G13350.1	NSP (nuclear shuttle protein)-interacting GTPase	11.96	1	4	4	133
	Sequence	# PSMs	# Proteins	# Protein Groups	Protein Group Accessions	Modifications	MH+ [Da]	q-Value	PEP	pRS Score	pRS Probability	pRS Site Probabilities
	SMSAPSLQPLQGVPSGGLQSSEVKPSGR	40	1	1	AT4G13350.1		2781.42	0	2.35179e-05
	EILGDSVIPLR	24	1	1	AT4G13350.1		1211.7	0	4.94255e-05
	SGTSLSSLMSTNEKPPEVK	24	1	1	AT4G13350.1		1991.99	0	8.07682e-06
	SMSAPSLQPLQGVPSGGLQSSEVKPSGR	13	1	1	AT4G13350.1	S3(Phospho)	2861.38	0	0.00963701	21.2799	0.135807	S(1): 13.6; S(3): 13.6; S(6): 62.2; S(15): 3.5; S(20): 3.5; S(21): 3.5; S(26): 0.2
	SMSAPSLQPLQGVPSGGLQSSEVKPSGR	1	1	1	AT4G13350.1	M2(Oxidation)	2797.41	0	2.39108e-05
	DLGSASPPVARPVR	20	1	1	AT4G13350.1		1421.79	0.000142	0.00432443
	SMSAPSLQPLQGVPSGGLQSSEVKPSGR	3	1	1	AT4G13350.1	Q11(Deamidated)	2782.41	0.000173	0.00235123
	DLGSASPPVARPVR	8	1	1	AT4G13350.1	S6(Phospho)	1501.75	0.003835	0.0977471	35.2275	0.952443	S(4): 4.8; S(6): 95.2
AT3G43300.2	HOPM interactor 7	16.33	2	16	20	431
	Sequence	# PSMs	# Proteins	# Protein Groups	Protein Group Accessions	Modifications	MH+ [Da]	q-Value	PEP	pRS Score	pRS Probability	pRS Site Probabilities
	VVTQAAPSSIVESSQAEGGGEK	64	2	1	AT3G43300.2		2131.05	0	3.42489e-11
	TGVEADEPQKVTSAEVAQQASQSK	32	2	1	AT3G43300.2		2488.21	0	7.96534e-08
	GSSLQCLVNVLK	12	2	1	AT3G43300.2	C6(Carbamidomethyl)	1317.72	0	0.000802315
	EMTLGDALTQAK	28	2	1	AT3G43300.2		1277.64	0	5.61158e-05
	GGLVSILNLGLPK	24	2	1	AT3G43300.2		1280.79	0	7.24703e-05
	SSVAEVTVPSSPYKHEDPTEPDSR	32	2	1	AT3G43300.2		2614.22	0	4.70793e-06
	IGTHGTSLESGIPPKADGSEGRPSSSGR	52	2	1	AT3G43300.2		2737.34	0	3.6592e-16
	GGLVSILNLGLPKR	24	2	1	AT3G43300.2		1436.9	0	0.000340278
	SSVAEVTVPSSPYKHEDPTEPDSR	59	2	1	AT3G43300.2	S10(Phospho)	2694.18	0	3.29169e-05	45.9768	0.73204	S(1): 0.1; S(2): 0.1; T(7): 1.7; S(10): 73.2; S(11): 19.3; Y(13): 5.5; T(19): 0.0; S(23): 0.0
	AIQAYQDGSKVVTQAAPSSIVESSQAEGGGEK	24	2	1	AT3G43300.2		3192.57	0	2.32855e-07
	DTTLASVEELHTLVGGADIK	24	2	1	AT3G43300.2		2069.08	0	1.17621e-05
	DTTLASVEELHTLVGGADIKGLEAALDK	4	2	1	AT3G43300.2		2866.51	0	0.000503148
	FMDNLFLR	16	2	1	AT3G43300.2		1055.53	0	0.000192871
	AELTNFTFQNDILKPFVIIMR	4	2	1	AT3G43300.2		2510.34	7.5e-05	0.000467472
	LVERNPASVAQFLR	8	2	1	AT3G43300.2		1599.9	7.6e-05	0.000362823
	DALLVFR	12	2	1	AT3G43300.2		833.488	0.00041	0.00957731
	LVSFCEQVLK	4	2	1	AT3G43300.2	C5(Carbamidomethyl)	1222.65	0.004615	0.12353
	TGVEADEPQKVTSAEVAQQASQSK	4	2	1	AT3G43300.2	Q19(Deamidated)	2489.22	0.021268	0.376851
	VLLTAVASGKFK	1	2	1	AT3G43300.2	T4(Phospho)	1313.72	0.5438	1	7.07854	0.678275	T(4): 67.8; S(8): 32.2
	EAENSTRNANEDSASTGEPIETKSR	1	2	1	AT3G43300.2	S5(Phospho)	2773.21	0.67186	1	7.34775	0.378423	S(5): 37.8; T(6): 19.4; S(13): 8.6; S(15): 8.6; T(16): 8.6; T(22): 8.6; S(24): 8.6
	EMRSKNVEALR	1	2	1	AT3G43300.2	S4(Phospho)	1412.66			29.1468	1	S(4): 100.0
	AIQAYQDGSKVVTQAAPSSIVESSQAEGGGEKTGVEADEPQK	1	2	1	AT3G43300.2	S19(Phospho); S23(Phospho)	4407.01			1.87764	0.0475901	Y(5): 24.4; S(9): 24.4; T(13): 24.4; S(18): 24.4; S(19): 26.2; S(23): 27.2; S(24): 24.4; T(33): 24.4
AT2G45820.1	Remorin family protein	29.47	1	6	6	164
	Sequence	# PSMs	# Proteins	# Protein Groups	Protein Group Accessions	Modifications	MH+ [Da]	q-Value	PEP	pRS Score	pRS Probability	pRS Site Probabilities
	TSKVDVESPAVLAPAKEPTPAPVEVADEK	48	1	1	AT2G45820.1		2974.56	0	4.40328e-09
	VDVESPAVLAPAKEPTPAPVEVADEK	24	1	1	AT2G45820.1		2658.38	0	2.95319e-08
	VAAIHKLAEEKR	24	1	1	AT2G45820.1		1364.8	0	0.000949421
	ALAVVEKPIEEHTPK	40	1	1	AT2G45820.1		1660.92	0	0.000358524
	ALAVVEKPIEEHTPK	7	1	1	AT2G45820.1	T13(Phospho)	1740.89	0	0.00544616	51.607	1	T(13): 100.0
	VDVESPAVLAPAK	16	1	1	AT2G45820.1		1295.72	0	0.000117039
	EPTPAPVEVADEK	4	1	1	AT2G45820.1		1381.68	0.001285	0.0302849
	VDVESPAVLAPAKEPTPAPVEVADEK	1	1	1	AT2G45820.1	T16(Phospho)	2738.35	0.617126	1	2.56829	0.643679	S(5): 35.6; T(16): 64.4
AT1G37130.1	nitrate reductase 2	26.94	2	16	18	378
	Sequence	# PSMs	# Proteins	# Protein Groups	Protein Group Accessions	Modifications	MH+ [Da]	q-Value	PEP	pRS Score	pRS Probability	pRS Site Probabilities
	AHQNQTTNQTVFLKPAK	48	1	1	AT1G37130.1		1926.02	0	1.42964e-07
	SDSPKAHQNQTTNQTVFLKPAK	84	1	1	AT1G37130.1		2440.25	0	1.26437e-08
	KGGALNVCFEGSEDLPGGAGTAGSK	20	1	1	AT1G37130.1	C8(Carbamidomethyl)	2379.13	0	1.05039e-10
	DEYTADSWIER	12	1	1	AT1G37130.1		1384.6	0	0.000474787
	LTGKHPFNSEAPLNR	8	1	1	AT1G37130.1		1680.88	0	0.000596752
	DEYTADSWIERNPSMVR	16	1	1	AT1G37130.1		2068.94	0	0.00125521
	SNAELEPSVLDPR	24	1	1	AT1G37130.1		1426.72	0	8.67929e-06
	SDSPKAHQNQTTNQTVFLKPAK	31	1	1	AT1G37130.1	S3(Phospho)	2520.22	0	3.0368e-05	60.9885	0.788898	S(1): 9.8; S(3): 78.9; T(11): 9.8; T(12): 1.4; T(15): 0.2
	TNVCKPHKGEIGIVFEHPTLPGNESGGWMAK	4	1	1	AT1G37130.1	C4(Carbamidomethyl)	3390.65	0	0.000153018
	LMHHGFITPVPLHYVR	8	2	1	AT1G37130.1		1917.03	0	0.000177467
	VHDDDEDVSSEDENETHNSNAVYYK	22	1	1	AT1G37130.1	S10(Phospho)	2991.14	0	3.88448e-08	104.142	0.913987	S(9): 8.6; S(10): 91.4; T(16): 0.0; S(19): 0.0; Y(23): 0.0; Y(24): 0.0
	SYKPPVPGRSDSPK	16	1	1	AT1G37130.1		1514.79	0	0.000530138
	LEPGLNGVVR	24	1	1	AT1G37130.1		1053.61	7.5e-05	0.00133989
	AKVPVQLVEK	20	1	1	AT1G37130.1		1110.69	7.8e-05	0.00169618
	KSNAELEPSVLDPR	20	1	1	AT1G37130.1		1554.81	0.000384	0.00398759
	IIIPGFIGGR	12	1	1	AT1G37130.1		1042.64	0.000598	0.0182809
	ESDNFYHFKDNR	4	1	1	AT1G37130.1		1571.68	0.008258	0.226277
	HLEKSADAPPSLK	1	1	1	AT1G37130.1	S5(Phospho)	1472.71			40.5635	0.999508	S(5): 100.0; S(11): 0.0
	FRFALPVEDMVLGLPVGK	4	1	1	AT1G37130.1		1988.12
AT1G21380.1	Target of Myb protein 1	23.52	1	6	6	113
	Sequence	# PSMs	# Proteins	# Protein Groups	Protein Group Accessions	Modifications	MH+ [Da]	q-Value	PEP	pRS Score	pRS Probability	pRS Site Probabilities
	NLSLNPTASAAPVTPPKKDDKPEDILFK	24	1	1	AT1G21380.1		3006.61	0	9.9824e-06
	TNKRPEYFQHNVPQHSSSASESSYDDLLGQSR	36	1	1	AT1G21380.1		3664.68	0	3.41707e-06
	SPEHALFTKPVYDQTEQLPPAPWETQEPR	22	1	1	AT1G21380.1	S1(Phospho)	3471.63	0	2.38227e-05	73.8699	0.992899	S(1): 99.3; T(8): 0.4; Y(12): 0.4; T(15): 0.0; T(25): 0.0
	TNKRPEYFQHNVPQHSSSASESSYDDLLGQSR	15	1	1	AT1G21380.1	Q14(Deamidated)	3665.7	0	2.19058e-05
	NLSLNPTASAAPVTPPK	4	1	1	AT1G21380.1		1677.92	0	4.75142e-05
	KDDKPEDILFK	4	1	1	AT1G21380.1		1347.72	7.6e-05	0.00022758
	NLSLNPTASAAPVTPPKKDDKPEDILFK	2	1	1	AT1G21380.1	N5(Deamidated)	3007.61	0.000203	0.00179925
	ILSLLDTWQEAFGGSGGRFPQYYNAYNELR	6	1	1	AT1G21380.1	Q9(Deamidated); Q21(Deamidated)	3467.68	0.008194	0.192277
AT1G07110.1	fructose-2,6-bisphosphatase	32.26	2	13	14	274
	Sequence	# PSMs	# Proteins	# Protein Groups	Protein Group Accessions	Modifications	MH+ [Da]	q-Value	PEP	pRS Score	pRS Probability	pRS Site Probabilities
	EMTIVVPDSSNIYSAFGEAESK	36	1	1	AT1G07110.1		2374.11	0	6.60342e-08
	NSMPAAAGAVAAAAVADQMLGPK	48	1	1	AT1G07110.1		2112.06	0	1.06264e-12
	AASIWTSTLQR	20	1	1	AT1G07110.1		1233.66	0	5.5442e-05
	SVETLSPFQQK	20	1	1	AT1G07110.1		1263.66	0	0.00361808
	HLAIVLVGLPAR	24	1	1	AT1G07110.1		1258.8	0	6.48837e-05
	SLSASSFLIDTK	20	1	1	AT1G07110.1	S3(Phospho)	1348.64	0	0.000365759	130.922	0.998292	S(1): 0.2; S(3): 99.8; S(5): 0.0; S(6): 0.0; T(11): 0.0
	SAECPLESLELDLAHYEVPAPAPSANSYLVYAADNAENPR	12	1	1	AT1G07110.1	C4(Carbamidomethyl); N26(Deamidated)	4345.05	0	9.78116e-07
	NSMPAAAGAVAAAAVADQMLGPK	4	1	1	AT1G07110.1	N1(Deamidated)	2113.05	0	1.57397e-05
	SAECPLESLELDLAHYEVPAPAPSANSYLVYAADNAENPR	9	1	1	AT1G07110.1	C4(Carbamidomethyl); N26(Deamidated); N35(Deamidated)	4346.03	0	2.44221e-08
	ESALMSELSFVVPPDHETLDFK	12	1	1	AT1G07110.1		2491.2	0	8.68348e-05
	SAECPLESLELDLAHYEVPAPAPSANSYLVYAADNAENPR	8	1	1	AT1G07110.1	C4(Carbamidomethyl)	4344.03	0	5.34432e-08
	NRNTPCIVEEGENR	8	1	1	AT1G07110.1	C6(Carbamidomethyl)	1687.78	0	0.00116709
	NSEDSGVTVDGSPSAK	4	2	1	AT1G07110.1		1549.69	0	0.000228486
	LEPVIIELER	16	1	1	AT1G07110.1		1210.7	7.6e-05	0.000583387
	SLSASGSFRNDSTPK	12	1	1	AT1G07110.1		1553.75	0.000378	0.00547757
	IGGDSVISDSGKLYAK	20	1	1	AT1G07110.1		1609.84	0.00051	0.0245796
	SEKAASIWTSTLQRTNLTASSIVGFPK	1	1	1	AT1G07110.1	S1(Phospho); S21(Phospho)	3053.49	0.377806	1	20.3793	0.142581	S(1): 75.5; S(6): 7.2; T(9): 8.5; S(10): 6.4; T(11): 6.4; T(15): 5.4; T(18): 50.6; S(20): 19.9; S(21): 19.9
AT1G01100.1	60S acidic ribosomal protein family	90.18	2	3	5	86
	Sequence	# PSMs	# Proteins	# Protein Groups	Protein Group Accessions	Modifications	MH+ [Da]	q-Value	PEP	pRS Score	pRS Probability	pRS Site Probabilities
	NVTDLIMNVGAGGGGGAPVAAAAPAAGGGAAAAPAAEEK	60	1	1	AT1G01100.1		3302.64	0	3.6592e-16
	RNVTDLIMNVGAGGGGGAPVAAAAPAAGGGAAAAPAAEEK	16	1	1	AT1G01100.1		3458.75	0	1.83681e-08
	STVGELACSYAVMILEDEGIAITADK	1	3	2	AT1G01100.1;AT5G47700.1	N-Term(Acetyl); C8(Carbamidomethyl)	2798.34	0	3.11e-06
	KKDEPAEESDGDLGFGLFD	3	3	2	AT1G01100.1;AT5G47700.1	S9(Phospho)	2148.9	0	4.97934e-05	168.363	1	S(9): 100.0
	AAGVSIESYWPMLFAK	4	2	1	AT1G01100.1		1769.89	7.5e-05	0.00035491
	NVTDLIMNVGAGGGGGAPVAAAAPAAGGGAAAAPAAEEK	2	1	1	AT1G01100.1	N8(Deamidated)	3303.65	0.000827	0.0213057
AT5G47700.1	60S acidic ribosomal protein family	76.11	1	2	5	50
	Sequence	# PSMs	# Proteins	# Protein Groups	Protein Group Accessions	Modifications	MH+ [Da]	q-Value	PEP	pRS Score	pRS Probability	pRS Site Probabilities
	NVTDLIMNVGAGGGGGAPVAAAAPAAGGGAAAAAPAAEEK	40	1	1	AT5G47700.1		3373.69	0	1.61808e-07
	STVGELACSYAVMILEDEGIAITADK	1	3	2	AT1G01100.1;AT5G47700.1	N-Term(Acetyl); C8(Carbamidomethyl)	2798.34	0	3.11e-06
	KKDEPAEESDGDLGFGLFD	3	3	2	AT1G01100.1;AT5G47700.1	S9(Phospho)	2148.9	0	4.97934e-05	168.363	1	S(9): 100.0
	RNVTDLIMNVGAGGGGGAPVAAAAPAAGGGAAAAAPAAEEK	2	1	1	AT5G47700.1	N9(Deamidated)	3530.79	0	0.00168942
	NVTDLIMNVGAGGGGGAPVAAAAPAAGGGAAAAAPAAEEK	3	1	1	AT5G47700.1	N8(Deamidated)	3374.68	0	4.16914e-05
	NVTDLIMNVGAGGGGGAPVAAAAPAAGGGAAAAAPAAEEKK	1	1	1	AT5G47700.1	M7(Oxidation)	3517.77
AT4G27430.1	COP1-interacting protein 7	4.73	1	1	3	3
	Sequence	# PSMs	# Proteins	# Protein Groups	Protein Group Accessions	Modifications	MH+ [Da]	q-Value	PEP	pRS Score	pRS Probability	pRS Site Probabilities
	HYSEDVGEVQASQEKPVSPK	1	1	1	AT4G27430.1	S18(Phospho)	2294.03	0.000132	0.00128641	61.7646	0.999925	Y(2): 0.0; S(3): 0.0; S(12): 0.0; S(18): 100.0
	HYSEDVGEVQASQEKPVSPKKSVTFSETNMEEK	1	1	1	AT4G27430.1	Y2(Phospho); S3(Phospho); S12(Phospho); T28(Phospho)	4044.62	0.307126	0.950158	0	0.0142857	Y(2): 50.0; S(3): 50.0; S(12): 50.0; S(18): 50.0; S(22): 50.0; T(24): 50.0; S(26): 50.0; T(28): 50.0
	IAEKSSGGSVSSSLASK	1	1	1	AT4G27430.1	S11(Phospho); S12(Phospho)	1754.77	0.694782	1	10.332	0.0798244	S(5): 11.0; S(6): 11.0; S(9): 35.6; S(11): 35.6; S(12): 35.6; S(13): 35.6; S(16): 35.6
AT4G31700.1	ribosomal protein S6	47.2	3	4	16	510
	Sequence	# PSMs	# Proteins	# Protein Groups	Protein Group Accessions	Modifications	MH+ [Da]	q-Value	PEP	pRS Score	pRS Probability	pRS Site Probabilities
	GCIVSPDLSVLNLVIVK	72	4	2	AT4G31700.1;AT5G10360.1	C2(Carbamidomethyl)	1826.04	0	1.47794e-07
	ISQEVSGDALGEEFK	52	3	2	AT4G31700.1;AT5G10360.1		1608.77	0	2.72054e-07
	KGENDLPGLTDTEKPR	40	2	1	AT4G31700.1		1769.9	0	5.73528e-09
	MKFNVANPTTGCQK	48	3	2	AT4G31700.1;AT5G10360.1	C12(Carbamidomethyl)	1595.76	0	1.18771e-05
	KLEIDDDQKLR	24	3	2	AT4G31700.1;AT5G10360.1		1372.74	0	3.00656e-06
	MKFNVANPTTGCQKK	48	3	2	AT4G31700.1;AT5G10360.1	C12(Carbamidomethyl)	1723.85	0	8.62605e-05
	LVTPLTLQR	28	4	2	AT4G31700.1;AT5G10360.1		1040.65	0	0.000463202
	MKFNVANPTTGCQKK	8	3	2	AT4G31700.1;AT5G10360.1	M1(Oxidation); C12(Carbamidomethyl)	1739.85	0	8.56622e-06
	GENDLPGLTDTEKPR	24	2	1	AT4G31700.1		1641.81	0	0.000111127
	ISQEVSGDALGEEFKGYVFK	56	3	2	AT4G31700.1;AT5G10360.1		2203.1	0	3.39717e-05
	LEIDDDQKLR	20	3	2	AT4G31700.1;AT5G10360.1		1244.65	0	0.000717851
	GCIVSPDLSVLNLVIVKK	24	4	2	AT4G31700.1;AT5G10360.1	C2(Carbamidomethyl)	1954.14	0	5.70953e-05
	IQRLVTPLTLQR	24	4	2	AT4G31700.1;AT5G10360.1		1437.89	0	0.000334607
	SRLSSAAAKPSVTA	12	2	1	AT4G31700.1		1345.74	0	0.00031559
	FNVANPTTGCQK	4	3	2	AT4G31700.1;AT5G10360.1	C10(Carbamidomethyl)	1336.63	0	0.000209741
	QGFPMKQGVLTPGR	4	3	2	AT4G31700.1;AT5G10360.1		1515.81	9.4e-05	0.00148516
	LSSAAAKPSVTA	12	2	1	AT4G31700.1		1102.61	0.000147	0.00456026
	SRLSSAAAKPSVTA	10	2	1	AT4G31700.1	S4(Phospho)	1425.71	0.000211	0.00709959	77.1025	0.915165	S(1): 0.8; S(4): 91.5; S(5): 7.7; S(11): 0.0; T(13): 0.0
AT4G15545.1	unknown protein; BEST Arabidopsis thaliana protein match is: unknown protein (TAIR:AT1G16520.1); Has 30201 Blast hits to 17322 proteins in 780 species: Archae - 12; Bacteria - 1396; Metazoa - 17338; Fungi - 3422; Plants - 5037; Viruses - 0; Other Eukaryotes - 2996 (source: NCBI BLink).	69.73	1	14	15	304
	Sequence	# PSMs	# Proteins	# Protein Groups	Protein Group Accessions	Modifications	MH+ [Da]	q-Value	PEP	pRS Score	pRS Probability	pRS Site Probabilities
	TLMMSLQDDDQNAGTTQIIAKPTPNDDDTPFQPSR	68	1	1	AT4G15545.1		3861.78	0	1.09887e-06
	LSYEQFGAFLGNVK	24	1	1	AT4G15545.1		1572.81	0	8.23005e-07
	EFEELQSHVESLEASLSDAFHK	32	1	1	AT4G15545.1		2532.19	0	4.64579e-11
	SRLSYEQFGAFLGNVK	28	1	1	AT4G15545.1		1815.94	0	2.97965e-07
	EKEFEELQSHVESLEASLSDAFHK	36	1	1	AT4G15545.1		2789.32	0	0.000461455
	KAEEIFGGDNRDLYVIFEGLITR	12	1	1	AT4G15545.1		2655.38	0	6.39875e-09
	SEIEEEEEEGSASAITGSR	9	1	1	AT4G15545.1	N-Term(Acetyl)	2051.89	0	2.02605e-09
	TLMMSLQDDDQNAGTTQIIAKPTPNDDDTPFQPSR	21	1	1	AT4G15545.1	Q17(Deamidated)	3862.78	0	0.000444945
	EKEFEELQSHVESLEASLSDAFHK	1	1	1	AT4G15545.1	Q8(Deamidated)	2790.32	0	0.000291467
	KITSIALSTR	8	1	1	AT4G15545.1		1089.66	0	0.00095799
	EFEELQSHVESLEASLSDAFHK	1	1	1	AT4G15545.1	Q6(Deamidated)	2533.19	0	1.92951e-08
	SSISISEPGSQTAR	8	1	1	AT4G15545.1		1419.71	0	0.000423158
	HSSIQSQQASEAIEPAATDNENDAPKPSLSASLPLVSQTTTPR	6	1	1	AT4G15545.1	Q38(Deamidated)	4475.19	0.000237	0.0064936
	SFDLPDELLQVLPSDPFEQLDVAR	1	1	1	AT4G15545.1	Q10(Deamidated)	2744.37	0.000237	0.00679235
	LTPPGSPPILSASGTPK	27	1	1	AT4G15545.1	S6(Phospho)	1699.87	0.000591	0.0494433	46.4568	0.99505	T(2): 0.2; S(6): 99.5; S(11): 0.2; S(13): 0.1; T(15): 0.1
	DVSKLEGFRK	12	1	1	AT4G15545.1		1178.65	0.000875	0.0263905
	LTPPGSPPILSASGTPK	8	1	1	AT4G15545.1		1619.9	0.014747	0.388266
	SFDLPDELLQVLPSDPFEQLDVARK	1	1	1	AT4G15545.1	Q10(Deamidated); Q19(Deamidated)	2873.46	0.019124	0.353724
	KTLMMSLQDDDQNAGTTQIIAKPTPNDDDTPFQPSR	1	1	1	AT4G15545.1	Q8(Deamidated); N26(Deamidated); Q33(Deamidated)	3992.85	0.217379	0.97574
AT1G52000.1	Mannose-binding lectin superfamily protein	32.88	1	11	11	179
	Sequence	# PSMs	# Proteins	# Protein Groups	Protein Group Accessions	Modifications	MH+ [Da]	q-Value	PEP	pRS Score	pRS Probability	pRS Site Probabilities
	AQGGSYGETFDDGAFDHVR	8	1	1	AT1G52000.1		2028.87	0	5.70812e-06
	IHVAVGGLGIEQIR	16	1	1	AT1G52000.1		1461.85	0	0.000760082
	NAGGSKPSSGSAGTNPGASAVGNGETEKNAGGSKPSSGSAGTNPGASAGGNGETEK	8	1	1	AT1G52000.1		4917.22	0	9.00723e-05
	NAGGSKPSSGSAGTNPGASAGGNGETEKNVGGSKPSSGKAGTNPGANAGGNGGTEK	8	1	1	AT1G52000.1		4899.25	0	0.00021038
	TNPGASAGGNGETVSNIGDTESNAGGSK	4	1	1	AT1G52000.1	N16(Deamidated)	2550.13	0	2.44093e-06
	SIEVEYDGTSLK	8	1	1	AT1G52000.1		1340.66	0	0.00036173
	ETNPGASGIGNSDGSTGTSPEGTESNADGTKTNTGGK	20	1	1	AT1G52000.1		3453.5	0	7.1173e-14
	TNPGASAGGNGETVSNIGDTESNAGGSK	32	1	1	AT1G52000.1		2549.13	0	2.87852e-08
	NAGGSKPSSGSAGTNPGASAVGNGETEK	16	1	1	AT1G52000.1		2489.15	0	3.04154e-06
	NAGGSKPSSGSAGTNPGASAGGNGETEKNVGGSKPSSGKAGTNPGANAGGNGGTEK	7	1	1	AT1G52000.1	N51(Deamidated)	4900.26	0	1.8544e-05
	NAGGSKPSSGSAGTNPGASAVGNGETEKNAGGSKPSSGSAGTNPGASAGGNGETEK	9	1	1	AT1G52000.1	N15(Deamidated)	4918.23	0	0.000488335
	NAGGSKPSSGSAGTNPGASAGGNGETEKNVGGSKPSSGKAGTNPGANAGGNGGTEK	10	1	1	AT1G52000.1	N15(Deamidated); N23(Deamidated)	4901.25	0	0.00213867
	NAGGSKPSSGSAGTNPGASAGGNGETEKNVGGSKPSSGK	16	1	1	AT1G52000.1		3445.61	0	3.6592e-16
	ETNPGASGIGNSDGSTGTSPEGTESNADGTKTNTGGK	8	1	1	AT1G52000.1	N26(Deamidated)	3454.51	0	6.2993e-14
	ETEKNAGGSKPSSGSAGTNPGASAVGNGETEK	4	1	1	AT1G52000.1		2976.37	9.2e-05	0.00218668
	NAGGSKPSSGSAGTNPGASAGGNGETEKNVGGSKPSSGK	4	1	1	AT1G52000.1	N23(Deamidated)	3446.62	0.000355	0.0032643
	SNDGANNGASGIESNAGSTGTNFGAGGTGGIGDTESDAGGSK	1	1	1	AT1G52000.1	S1(Phospho); S10(Phospho); S14(Phospho); T34(Phospho); S36(Phospho); S41(Phospho)	4196.37	0.000809	0.0630786			Too many isoforms
AT1G79280.2	nuclear pore anchor	7.14	3	3	8	54
	Sequence	# PSMs	# Proteins	# Protein Groups	Protein Group Accessions	Modifications	MH+ [Da]	q-Value	PEP	pRS Score	pRS Probability	pRS Site Probabilities
	SGTISSGSTDSDHLEDSGLQR	28	3	1	AT1G79280.2		2148.96	0	7.94522e-05
	YQTALTHLSEELEK	4	3	1	AT1G79280.2		1661.84	0	0.00105897
	SGTISSGSTDSDHLEDSGLQR	1	3	1	AT1G79280.2	Q20(Deamidated)	2149.96	0.001133	0.0173968
	IGSLQEDLSSCKDAATTTEEQYTAELFTANK	3	3	1	AT1G79280.2	S10(Phospho); C11(Carbamidomethyl); Y22(Phospho)	3581.52	0.001977	0.0789861	11.4506	0.0636398	S(3): 11.9; S(9): 39.4; S(10): 39.4; T(16): 18.2; T(17): 18.2; T(18): 18.2; Y(22): 18.2; T(23): 18.2; T(28): 18.2
	NKTDEASAKVATVLK	12	3	1	AT1G79280.2		1574.87	0.00308	0.0813644
	SSDPKTLDMDSGGIVSLSDKEAALVIILDVVHK	1	1	1	AT1G79280.2	S18(Phospho)	3532.8	0.140969	1	14.2007	0.562698	S(1): 2.9; S(2): 2.9; T(6): 2.9; S(11): 8.2; S(16): 26.9; S(18): 56.3
	TLDMDSGGIVSLSDKEAALVIILDVVHKIQAGFR	1	1	1	AT1G79280.2	T1(Phospho); S6(Phospho); S11(Phospho); S13(Phospho)	3930.82	0.374333	1	8.07617	1	T(1): 100.0; S(6): 100.0; S(11): 100.0; S(13): 100.0
	DELSKQNQSLAK	1	3	1	AT1G79280.2	Q6(Deamidated); N7(Deamidated); Q8(Deamidated)	1363.67	0.622155	1
	VDNSGTSNMIEESQAVISK	3	3	1	AT1G79280.2	T6(Phospho)	2088.92	0.689323	1	4.82164e-15	0.156467	S(4): 37.4; T(6): 15.6; S(7): 15.6; S(13): 15.6; S(18): 15.6
AT1G04820.1	tubulin alpha-4 chain	40	3	3	15	408
	Sequence	# PSMs	# Proteins	# Protein Groups	Protein Group Accessions	Modifications	MH+ [Da]	q-Value	PEP	pRS Score	pRS Probability	pRS Site Probabilities
	TVGGGDDAFNTFFSETGAGK	36	3	1	AT1G04820.1		1977.88	0	2.31169e-10
	KLADNCTGLQGFLVFNAVGGGTGSGLGSLLLER	36	5	3	AT1G64740.1;AT1G04820.1;AT5G19770.1	C6(Carbamidomethyl)	3321.73	0	5.79787e-09
	TIQFVDWCPTGFK	28	4	2	AT1G64740.1;AT1G04820.1	C8(Carbamidomethyl)	1598.77	0	0.000253999
	AVFVDLEPTVIDEVR	52	4	2	AT1G04820.1;AT5G19770.1		1701.9	0	3.07908e-06
	QLFHPEQLISGKEDAANNFAR	36	5	3	AT1G64740.1;AT1G04820.1;AT5G19770.1		2385.19	0	1.63408e-07
	TVGGGDDAFNTFFSETGAGKHVPR	56	3	1	AT1G04820.1		2467.16	0	4.98786e-05
	AFHEQLSVAEITNSAFEPASMMAK	36	3	1	AT1G04820.1		2609.24	0	7.97501e-06
	CGINYQPPTVVPGGDLAK	28	4	2	AT1G04820.1;AT5G19770.1	C1(Carbamidomethyl)	1885.94	0	7.90205e-07
	QLFHPEQLISGK	20	5	3	AT1G64740.1;AT1G04820.1;AT5G19770.1		1396.76	0	0.000230436
	LADNCTGLQGFLVFNAVGGGTGSGLGSLLLER	9	5	3	AT1G64740.1;AT1G04820.1;AT5G19770.1	C5(Carbamidomethyl); Q9(Deamidated)	3194.63	0	0.000823866
	TGTYRQLFHPEQLISGKEDAANNFAR	12	5	3	AT1G64740.1;AT1G04820.1;AT5G19770.1		2963.48	0	3.32555e-07
	LADNCTGLQGFLVFNAVGGGTGSGLGSLLLER	20	5	3	AT1G64740.1;AT1G04820.1;AT5G19770.1	C5(Carbamidomethyl)	3193.64	0	6.17104e-06
	IDHKFDLMYAK	20	3	2	AT1G04820.1;AT5G19770.1		1380.7	0	2.95362e-05
	KLADNCTGLQGFLVFNAVGGGTGSGLGSLLLER	6	5	3	AT1G64740.1;AT1G04820.1;AT5G19770.1	C6(Carbamidomethyl); N16(Deamidated)	3322.73	0	0.000137893
	TGTYRQLFHPEQLISGKEDAANNFAR	4	5	3	AT1G64740.1;AT1G04820.1;AT5G19770.1	Q6(Deamidated)	2964.48	0.000196	0.0107424
	TGTYRQLFHPEQLISGK	4	5	3	AT1G64740.1;AT1G04820.1;AT5G19770.1		1975.04	0.000352	0.0109126
	LADNCTGLQGFLVFNAVGGGTGSGLGSLLLERLSVDYGK	1	4	2	AT1G04820.1;AT5G19770.1	C5(Carbamidomethyl); T6(Phospho)	4035.98	0.003277	0.114275	14.6984	0.834969	T(6): 83.5; T(21): 2.8; S(23): 2.8; S(27): 2.8; S(34): 4.0; Y(37): 4.0
	EIVDLCLDR	4	4	2	AT1G04820.1;AT5G19770.1	C6(Carbamidomethyl)	1132.57	0.003635	0.0826814
AT5G19770.1	tubulin alpha-3	38.44	1	2	14	320
	Sequence	# PSMs	# Proteins	# Protein Groups	Protein Group Accessions	Modifications	MH+ [Da]	q-Value	PEP	pRS Score	pRS Probability	pRS Site Probabilities
	KLADNCTGLQGFLVFNAVGGGTGSGLGSLLLER	36	5	3	AT1G64740.1;AT1G04820.1;AT5G19770.1	C6(Carbamidomethyl)	3321.73	0	5.79787e-09
	AVCMISNNTAVAEVFSR	4	2	2	AT1G64740.1;AT5G19770.1	C3(Carbamidomethyl)	1868.9	0	8.50368e-06
	AVFVDLEPTVIDEVR	52	4	2	AT1G04820.1;AT5G19770.1		1701.9	0	3.07908e-06
	QLFHPEQLISGKEDAANNFAR	36	5	3	AT1G64740.1;AT1G04820.1;AT5G19770.1		2385.19	0	1.63408e-07
	CGINYQPPTVVPGGDLAK	28	4	2	AT1G04820.1;AT5G19770.1	C1(Carbamidomethyl)	1885.94	0	7.90205e-07
	AYHEQLSVPEITNAVFEPASMMAK	40	1	1	AT5G19770.1		2663.28	0	1.5068e-06
	QLFHPEQLISGK	20	5	3	AT1G64740.1;AT1G04820.1;AT5G19770.1		1396.76	0	0.000230436
	LADNCTGLQGFLVFNAVGGGTGSGLGSLLLER	9	5	3	AT1G64740.1;AT1G04820.1;AT5G19770.1	C5(Carbamidomethyl); Q9(Deamidated)	3194.63	0	0.000823866
	TVQFVDWCPTGFK	20	1	1	AT5G19770.1	C8(Carbamidomethyl)	1584.75	0	0.000159913
	TGTYRQLFHPEQLISGKEDAANNFAR	12	5	3	AT1G64740.1;AT1G04820.1;AT5G19770.1		2963.48	0	3.32555e-07
	LADNCTGLQGFLVFNAVGGGTGSGLGSLLLER	20	5	3	AT1G64740.1;AT1G04820.1;AT5G19770.1	C5(Carbamidomethyl)	3193.64	0	6.17104e-06
	IDHKFDLMYAK	20	3	2	AT1G04820.1;AT5G19770.1		1380.7	0	2.95362e-05
	KLADNCTGLQGFLVFNAVGGGTGSGLGSLLLER	6	5	3	AT1G64740.1;AT1G04820.1;AT5G19770.1	C6(Carbamidomethyl); N16(Deamidated)	3322.73	0	0.000137893
	TGTYRQLFHPEQLISGKEDAANNFAR	4	5	3	AT1G64740.1;AT1G04820.1;AT5G19770.1	Q6(Deamidated)	2964.48	0.000196	0.0107424
	AYHEQLSVPEITNAVFEPASMMAK	4	1	1	AT5G19770.1	N13(Deamidated)	2664.29	0.000209	0.00454945
	TGTYRQLFHPEQLISGK	4	5	3	AT1G64740.1;AT1G04820.1;AT5G19770.1		1975.04	0.000352	0.0109126
	LADNCTGLQGFLVFNAVGGGTGSGLGSLLLERLSVDYGK	1	4	2	AT1G04820.1;AT5G19770.1	C5(Carbamidomethyl); T6(Phospho)	4035.98	0.003277	0.114275	14.6984	0.834969	T(6): 83.5; T(21): 2.8; S(23): 2.8; S(27): 2.8; S(34): 4.0; Y(37): 4.0
	EIVDLCLDR	4	4	2	AT1G04820.1;AT5G19770.1	C6(Carbamidomethyl)	1132.57	0.003635	0.0826814
AT3G51740.1	inflorescence meristem receptor-like kinase 2	4.9	1	1	2	4
	Sequence	# PSMs	# Proteins	# Protein Groups	Protein Group Accessions	Modifications	MH+ [Da]	q-Value	PEP	pRS Score	pRS Probability	pRS Site Probabilities
	TSEKTVSAGVAGTASAGGEMGGK	3	1	1	AT3G51740.1	T1(Phospho); S2(Phospho)	2212.92	0.003485	0.0921983	4.02928	0.0443658	T(1): 22.2; S(2): 22.2; T(5): 22.2; S(7): 22.2; T(13): 55.6; S(15): 55.6
	LNLSFNSLSGPLPVSVAR	1	1	1	AT3G51740.1	S9(Phospho); S15(Phospho)	2030.98	0.598942	1	5.92334	0.362519	S(4): 29.7; S(7): 43.6; S(9): 59.4; S(15): 67.3
AT5G20340.1	beta-1,3-glucanase 5	2.26	1	1	1	1
	Sequence	# PSMs	# Proteins	# Protein Groups	Protein Group Accessions	Modifications	MH+ [Da]	q-Value	PEP	pRS Score	pRS Probability	pRS Site Probabilities
	SIDITKIR	1	1	1	AT5G20340.1	T5(Phospho)	1025.54	0.02427	0.453817	85.5637	0.999997	S(1): 0.0; T(5): 100.0
AT5G35410.1	Protein kinase superfamily protein	11.43	1	1	3	8
	Sequence	# PSMs	# Proteins	# Protein Groups	Protein Group Accessions	Modifications	MH+ [Da]	q-Value	PEP	pRS Score	pRS Probability	pRS Site Probabilities
	LYEVLASPSKIYIVLEFVTGGELFDRIVHK	6	1	1	AT5G35410.1	Y2(Phospho); T19(Phospho)	3595.82	0.006992	0.172017	0.618423	0.0951141	Y(2): 38.3; S(7): 43.4; S(9): 38.7; Y(12): 42.0; T(19): 37.6
	IMAKSTILK	1	1	1	AT5G35410.1		1004.61	0.089842	0.989911
	ATEGIPKSEILR	1	1	1	AT5G35410.1		1313.74
AT3G14415.1	Aldolase-type TIM barrel family protein	79.56	2	11	31	954
	Sequence	# PSMs	# Proteins	# Protein Groups	Protein Group Accessions	Modifications	MH+ [Da]	q-Value	PEP	pRS Score	pRS Probability	pRS Site Probabilities
	MDEANDSGLASYVAGQIDR	8	6	2	AT3G14415.1;AT3G14420.1	M1(Oxidation)	2027.89	0	4.31762e-11
	MDEANDSGLASYVAGQIDR	40	6	2	AT3G14415.1;AT3G14420.1		2011.9	0	4.32616e-10
	IAIQAGAAGIIVSNHGAR	72	6	2	AT3G14415.1;AT3G14420.1		1718.96	0	7.23212e-10
	QLDYVPATISALEEVVK	68	7	2	AT3G14415.1;AT3G14420.1		1875.01	0	5.92723e-09
	DIQWLQTITNMPILVK	52	2	1	AT3G14415.1		1913.05	0	1.34804e-07
	MVYDYYASGAEDQWTLQENR	8	7	2	AT3G14415.1;AT3G14420.1		2439.06	0	7.83171e-09
	AASAAGTIMTLSSWATSSVEEVASTGPGIR	84	7	2	AT3G14415.1;AT3G14420.1		2908.43	0	3.72138e-09
	DEFELTMALSGCR	24	8	2	AT3G14415.1;AT3G14420.1	C12(Carbamidomethyl)	1528.68	0	1.12632e-07
	AIALTVDTPR	24	9	2	AT3G14415.1;AT3G14420.1		1056.6	0	3.22116e-05
	QLDYVPATISALEEVVKATQGR	20	7	2	AT3G14415.1;AT3G14420.1		2388.28	0	9.53539e-06
	NFEGLDLGK	24	9	2	AT3G14415.1;AT3G14420.1		992.505	0	4.07072e-05
	ILIDVNKIDMATTVLGFK	6	2	1	AT3G14415.1	M10(Oxidation)	2007.12	0	4.51708e-07
	ILIDVNKIDMATTVLGFK	36	2	1	AT3G14415.1		1991.12	0	1.33219e-11
	VPVFLDGGVR	24	2	1	AT3G14415.1		1058.6	0	0.00044385
	NHIVTEWDTPR	44	2	1	AT3G14415.1		1367.67	0	0.00129584
	NHIVTEWDTPRHLPR	24	2	1	AT3G14415.1		1870.97	0	0.00049973
	ESDIKNRFTLPPNLTLK	48	7	2	AT3G14415.1;AT3G14420.1		1986.1	0	0.00258634
	MAHPDGEYATAR	56	7	2	AT3G14415.1;AT3G14420.1		1318.58	0	3.24273e-05
	AGFKAIALTVDTPR	24	7	2	AT3G14415.1;AT3G14420.1		1459.82	0	0.000951431
	MEITNVTEYDAIAK	9	4	2	AT3G14415.1;AT3G14420.1	N-Term(Acetyl)	1639.79	0	3.30839e-07
	DIQWLQTITNMPILVK	3	2	1	AT3G14415.1	N10(Deamidated)	1914.05	0	0.000658597
	MVYDYYASGAEDQWTLQENRNAFAR	4	5	2	AT3G14415.1;AT3G14420.1		2998.34	0	8.76237e-05
	DIQWLQTITNMPILVK	1	2	1	AT3G14415.1	M11(Oxidation)	1929.05	0	5.08093e-07
	NRKVVEQLVR	16	2	1	AT3G14415.1		1240.75	0	0.00115379
	TLSWKDIQWLQTITNMPILVK	12	2	1	AT3G14415.1		2528.39	0	0.000753195
	ATQGRVPVFLDGGVR	12	2	1	AT3G14415.1		1571.86	0	9.35288e-06
	GVLTGEDAR	4	6	2	AT3G14415.1;AT3G14420.1		917.468	0	0.015738
	MEITNVTEYDAIAK	8	4	2	AT3G14415.1;AT3G14420.1		1597.77	0	3.6592e-16
	FTLPPNLTLK	108	7	2	AT3G14415.1;AT3G14420.1		1143.68	7.5e-05	0.00165262
	NHIVTEWDTPRHLPRL	4	2	1	AT3G14415.1		1984.05	7.6e-05	0.000745039
	IAIQAGAAGIIVSNHGAR	6	6	2	AT3G14415.1;AT3G14420.1	Q4(Deamidated)	1719.95	0.000164	0.0042481
	FFQLYVYK	24	9	2	AT3G14415.1;AT3G14420.1		1107.59	0.00021	0.00548431
	ATQGRVPVFLDGGVRR	24	2	1	AT3G14415.1		1727.97	0.000281	0.00969142
	IDMATTVLGFK	4	2	1	AT3G14415.1		1195.64	0.000378	0.00291434
	QLDYVPATISALEEVVKATQGR	2	7	2	AT3G14415.1;AT3G14420.1	Q1(Deamidated)	2389.27	0.000463	0.0100119
	NRFTLPPNLTLK	8	7	2	AT3G14415.1;AT3G14420.1		1413.82	0.001285	0.0346594
	ILFRPR	8	7	2	AT3G14415.1;AT3G14420.1		801.509	0.001876	0.0404513
	MEITNVTEYDAIAK	2	4	2	AT3G14415.1;AT3G14420.1	T7(Phospho)	1677.73	0.007086	0.193034	32.4659	0.773123	T(4): 11.3; T(7): 77.3; Y(9): 11.3
	IAIQAGAAGIIVSNHGAR	1	6	2	AT3G14415.1;AT3G14420.1	Q4(Deamidated); N14(Deamidated)	1720.95	0.050321	0.645246
	VPVFLDGGVRR	8	2	1	AT3G14415.1		1214.7
AT3G14420.1	Aldolase-type TIM barrel family protein	84.47	7	15	34	1040
	Sequence	# PSMs	# Proteins	# Protein Groups	Protein Group Accessions	Modifications	MH+ [Da]	q-Value	PEP	pRS Score	pRS Probability	pRS Site Probabilities
	MDEANDSGLASYVAGQIDR	8	6	2	AT3G14415.1;AT3G14420.1	M1(Oxidation)	2027.89	0	4.31762e-11
	MDEANDSGLASYVAGQIDR	40	6	2	AT3G14415.1;AT3G14420.1		2011.9	0	4.32616e-10
	IAIQAGAAGIIVSNHGAR	72	6	2	AT3G14415.1;AT3G14420.1		1718.96	0	7.23212e-10
	QLDYVPATISALEEVVK	68	7	2	AT3G14415.1;AT3G14420.1		1875.01	0	5.92723e-09
	MVYDYYASGAEDQWTLQENR	8	7	2	AT3G14415.1;AT3G14420.1		2439.06	0	7.83171e-09
	AASAAGTIMTLSSWATSSVEEVASTGPGIR	84	7	2	AT3G14415.1;AT3G14420.1		2908.43	0	3.72138e-09
	ILIDVSKIDMTTTVLGFK	28	5	1	AT3G14420.1		1994.12	0	1.90624e-07
	DEFELTMALSGCR	24	8	2	AT3G14415.1;AT3G14420.1	C12(Carbamidomethyl)	1528.68	0	1.12632e-07
	AIALTVDTPR	24	9	2	AT3G14415.1;AT3G14420.1		1056.6	0	3.22116e-05
	TLSWKDVQWLQTITKLPILVK	48	5	1	AT3G14420.1		2510.48	0	7.0395e-05
	QLDYVPATISALEEVVKATQGRIPVFLDGGVR	12	5	1	AT3G14420.1		3441.87	0	4.1803e-05
	QLDYVPATISALEEVVKATQGR	20	7	2	AT3G14415.1;AT3G14420.1		2388.28	0	9.53539e-06
	NFEGLDLGK	24	9	2	AT3G14415.1;AT3G14420.1		992.505	0	4.07072e-05
	IDMTTTVLGFK	8	5	1	AT3G14420.1		1225.65	0	0.000566871
	ATQGRIPVFLDGGVR	32	5	1	AT3G14420.1		1585.88	0	1.16979e-05
	DVQWLQTITKLPILVK	80	5	1	AT3G14420.1		1895.14	0	7.13848e-05
	NVVEQLVR	24	5	1	AT3G14420.1		956.553	0	0.000400807
	IPVFLDGGVR	24	7	1	AT3G14420.1		1072.61	0	0.0149167
	NRNVVEQLVR	16	5	1	AT3G14420.1		1226.69	0	0.000258175
	ISMPIMVAPTAMQK	5	5	1	AT3G14420.1	M12(Oxidation)	1533.78	0	0.00037134
	NHITTEWDTPRPSAR	36	5	1	AT3G14420.1		1780.87	0	0.000133963
	ESDIKNRFTLPPNLTLK	48	7	2	AT3G14415.1;AT3G14420.1		1986.1	0	0.00258634
	MAHPDGEYATAR	56	7	2	AT3G14415.1;AT3G14420.1		1318.58	0	3.24273e-05
	AGFKAIALTVDTPR	24	7	2	AT3G14415.1;AT3G14420.1		1459.82	0	0.000951431
	MEITNVTEYDAIAK	9	4	2	AT3G14415.1;AT3G14420.1	N-Term(Acetyl)	1639.79	0	3.30839e-07
	MVYDYYASGAEDQWTLQENRNAFAR	4	5	2	AT3G14415.1;AT3G14420.1		2998.34	0	8.76237e-05
	GVLTGEDAR	4	6	2	AT3G14415.1;AT3G14420.1		917.468	0	0.015738
	MEITNVTEYDAIAK	8	4	2	AT3G14415.1;AT3G14420.1		1597.77	0	3.6592e-16
	TLSWKDVQWLQTITKLPILVK	2	5	1	AT3G14420.1	Q11(Deamidated)	2511.47	0	0.000885184
	QLDYVPATISALEEVVKATQGRIPVFLDGGVR	2	5	1	AT3G14420.1	Q20(Deamidated)	3442.87	0	0.000615733
	FTLPPNLTLK	108	7	2	AT3G14415.1;AT3G14420.1		1143.68	7.5e-05	0.00165262
	MEITNVTEYDAIAKQKLPK	5	2	1	AT3G14420.1	N-Term(Acetyl)	2234.17	7.5e-05	0.00159649
	IAIQAGAAGIIVSNHGAR	6	6	2	AT3G14415.1;AT3G14420.1	Q4(Deamidated)	1719.95	0.000164	0.0042481
	FFQLYVYK	24	9	2	AT3G14415.1;AT3G14420.1		1107.59	0.00021	0.00548431
	IPVFLDGGVRR	24	7	1	AT3G14420.1		1228.72	0.000428	0.0145504
	QLDYVPATISALEEVVKATQGR	2	7	2	AT3G14415.1;AT3G14420.1	Q1(Deamidated)	2389.27	0.000463	0.0100119
	DVQWLQTITKLPILVK	2	5	1	AT3G14420.1	Q6(Deamidated)	1896.13	0.000585	0.0105415
	NRFTLPPNLTLK	8	7	2	AT3G14415.1;AT3G14420.1		1413.82	0.001285	0.0346594
	ILFRPR	8	7	2	AT3G14415.1;AT3G14420.1		801.509	0.001876	0.0404513
	DVQWLQTITK	4	5	1	AT3G14420.1		1231.67	0.003188	0.0854006
	ATQGRIPVFLDGGVRR	4	5	1	AT3G14420.1		1741.98	0.003444	0.107777
	MEITNVTEYDAIAK	2	4	2	AT3G14415.1;AT3G14420.1	T7(Phospho)	1677.73	0.007086	0.193034	32.4659	0.773123	T(4): 11.3; T(7): 77.3; Y(9): 11.3
	IAIQAGAAGIIVSNHGAR	1	6	2	AT3G14415.1;AT3G14420.1	Q4(Deamidated); N14(Deamidated)	1720.95	0.050321	0.645246
AT4G34190.1	stress enhanced protein 1	21.92	1	1	1	9
	Sequence	# PSMs	# Proteins	# Protein Groups	Protein Group Accessions	Modifications	MH+ [Da]	q-Value	PEP	pRS Score	pRS Probability	pRS Site Probabilities
	ALSQVSASLAFSLPNSGALKLATITNPTSTCR	9	1	1	AT4G34190.1	T30(Phospho); C31(Carbamidomethyl)	3356.7	0.008362	0.193362	1.99195	0.117254	S(3): 7.4; S(6): 7.4; S(8): 7.4; S(12): 7.4; S(16): 11.7; T(23): 11.7; T(25): 11.7; T(28): 11.7; S(29): 11.7; T(30): 11.7
AT3G25070.1	RPM1 interacting protein 4	32.23	1	3	3	40
	Sequence	# PSMs	# Proteins	# Protein Groups	Protein Group Accessions	Modifications	MH+ [Da]	q-Value	PEP	pRS Score	pRS Probability	pRS Site Probabilities
	IMNPNDPEYNSDSQSQAPPHPPSSR	28	1	1	AT3G25070.1		2765.22	0	3.6592e-16
	FGDWDENNPSSADGYTHIFNK	4	1	1	AT3G25070.1		2414.03	0	7.78178e-06
	IMNPNDPEYNSDSQSQAPPHPPSSR	5	1	1	AT3G25070.1	Q16(Deamidated)	2766.19	0	4.53866e-05
	SRPKPTNLRADESPEKVTVVPK	3	1	1	AT3G25070.1	S13(Phospho)	2528.32	0.008957	0.26124	23.4497	0.1055	S(1): 0.3; T(6): 1.6; S(13): 10.5; T(18): 87.5
AT1G09830.1	Glycinamide ribonucleotide (GAR) synthetase	4.51	1	1	1	1
	Sequence	# PSMs	# Proteins	# Protein Groups	Protein Group Accessions	Modifications	MH+ [Da]	q-Value	PEP	pRS Score	pRS Probability	pRS Site Probabilities
	VGDGDTGPNTGGMGAYSPAPVLTK	1	1	1	AT1G09830.1	T6(Phospho); T23(Phospho)	2421.99	0.00936	0.211544	15.662	0.487346	T(6): 58.7; T(10): 27.1; Y(16): 16.4; S(17): 14.9; T(23): 83.0
AT5G56500.1	TCP-1/cpn60 chaperonin family protein	34.67	1	1	16	395
	Sequence	# PSMs	# Proteins	# Protein Groups	Protein Group Accessions	Modifications	MH+ [Da]	q-Value	PEP	pRS Score	pRS Probability	pRS Site Probabilities
	LSGGVAVIQVGAQTETELK	60	3	3	AT1G55490.1;AT3G13470.1;AT5G56500.1		1900.03	0	1.14565e-07
	AAVEEGIVVGGGCTLLR	64	3	3	AT1G55490.1;AT3G13470.1;AT5G56500.1	C13(Carbamidomethyl)	1700.9	0	3.31339e-07
	LADLVGVTLGPK	24	3	3	AT1G55490.1;AT3G13470.1;AT5G56500.1		1182.71	0	1.93237e-06
	VVAAGANPVLITR	24	3	3	AT1G55490.1;AT3G13470.1;AT5G56500.1		1280.77	0	4.27328e-07
	YEDLMAAGIIDPTK	28	3	3	AT1G55490.1;AT3G13470.1;AT5G56500.1		1536.76	0	1.7146e-07
	EVELEDPVENIGAK	28	3	3	AT1G55490.1;AT3G13470.1;AT5G56500.1		1541.77	0	5.48974e-05
	YEDLMAAGIIDPTKVVR	28	3	3	AT1G55490.1;AT3G13470.1;AT5G56500.1		1891	0	2.23013e-06
	IVNDGVTVAR	20	3	3	AT1G55490.1;AT3G13470.1;AT5G56500.1		1043.58	0	3.78788e-05
	NAGVNGSVVSEK	20	3	3	AT1G55490.1;AT3G13470.1;AT5G56500.1		1160.59	0	0.00100606
	LRVEDALNATK	24	3	3	AT1G55490.1;AT3G13470.1;AT5G56500.1		1229.68	0	6.8928e-07
	YEDLMAAGIIDPTKVVR	5	3	3	AT1G55490.1;AT3G13470.1;AT5G56500.1	M5(Oxidation)	1906.99	0	7.47877e-07
	GYISPYFVTDSEK	4	3	3	AT1G55490.1;AT3G13470.1;AT5G56500.1		1505.71	0	0.000646723
	VGRKGVVTLEEGK	28	3	3	AT1G55490.1;AT3G13470.1;AT5G56500.1		1371.79	0	9.94511e-06
	TFLMSDCVVVEIK	12	2	2	AT1G55490.1;AT5G56500.1	C7(Carbamidomethyl)	1540.78	0	0.000285517
	ALSYPLKLIAK	16	3	3	AT1G55490.1;AT3G13470.1;AT5G56500.1		1216.77	0	0.000963225
	IAKLSGGVAVIQVGAQTETELK	4	3	3	AT1G55490.1;AT3G13470.1;AT5G56500.1		2212.25	0.000227	0.0050052
	LSGGVAVIQVGAQTETELK	2	3	3	AT1G55490.1;AT3G13470.1;AT5G56500.1	Q9(Deamidated); Q13(Deamidated)	1902	0.00057	0.0148
	TNDLAGDGTTTSVVLAQGLIAEGVKVVAAGANPVLITRGIEK	4	1	1	AT5G56500.1	T1(Phospho); T9(Phospho); T37(Phospho)	4359.17	0.010409	0.224194	8.40547	0.0835564	T(1): 43.3; T(9): 43.3; T(10): 43.3; T(11): 43.3; S(12): 43.3; T(37): 83.6
AT2G45420.1	LOB domain-containing protein 18	16.79	1	1	1	6
	Sequence	# PSMs	# Proteins	# Protein Groups	Protein Group Accessions	Modifications	MH+ [Da]	q-Value	PEP	pRS Score	pRS Probability	pRS Site Probabilities
	SGGGNTITAVGGGGGGCGGGGSSGGGGSSGGGGGGPCGACKFLR	6	1	1	AT2G45420.1	C17(Carbamidomethyl); S22(Phospho); S23(Phospho); C37(Carbamidomethyl); C40(Carbamidomethyl)	3774.47	0.010506	0.259391	1.24818	0.0336555	S(1): 26.1; T(6): 26.1; T(8): 26.1; S(22): 26.1; S(23): 26.1; S(28): 34.9; S(29): 34.9
AT4G14700.1	origin recognition complex 1	3.09	1	1	1	8
	Sequence	# PSMs	# Proteins	# Protein Groups	Protein Group Accessions	Modifications	MH+ [Da]	q-Value	PEP	pRS Score	pRS Probability	pRS Site Probabilities
	KSYLSPSSTSLTPPQTPETLTPLRR	8	1	1	AT4G14700.1	S5(Phospho)	2837.45	0.010815	0.240429	2.41082e-15	0.0909091	S(2): 9.1; Y(3): 9.1; S(5): 9.1; S(7): 9.1; S(8): 9.1; T(9): 9.1; S(10): 9.1; T(12): 9.1; T(16): 9.1; T(19): 9.1; T(21): 9.1
AT1G23760.1	BURP domain-containing protein	8.84	1	1	2	3
	Sequence	# PSMs	# Proteins	# Protein Groups	Protein Group Accessions	Modifications	MH+ [Da]	q-Value	PEP	pRS Score	pRS Probability	pRS Site Probabilities
	FNSYGTSATGGSGDFKNYQSGVNNPTTRFK	2	1	1	AT1G23760.1	Y4(Phospho); T9(Phospho); S12(Phospho); Y18(Phospho)	3522.35	0.011237	0.290352			Too many isoforms
	FSVYDQRNFTNYGTIHPGGADSFKK	1	1	1	AT1G23760.1	T10(Phospho); Y12(Phospho); T14(Phospho)	3089.26			2.68466	0.0649801	S(2): 53.0; Y(4): 53.0; T(10): 53.0; Y(12): 53.0; T(14): 53.0; S(22): 35.0
AT5G56740.1	histone acetyltransferase of the GNAT family 2	2.78	1	1	1	1
	Sequence	# PSMs	# Proteins	# Protein Groups	Protein Group Accessions	Modifications	MH+ [Da]	q-Value	PEP	pRS Score	pRS Probability	pRS Site Probabilities
	LSQILVLPSFQGK	1	1	1	AT5G56740.1	S9(Phospho)	1509.8	0.011279	0.247102	30.019	0.995786	S(2): 0.4; S(9): 99.6
AT4G25530.1	FLOWERING WAGENINGEN	5.25	1	1	1	12
	Sequence	# PSMs	# Proteins	# Protein Groups	Protein Group Accessions	Modifications	MH+ [Da]	q-Value	PEP	pRS Score	pRS Probability	pRS Site Probabilities
	IVNNGMLVLQEIWNDASGAMVVYAPVETNSIELVKR	12	1	1	AT4G25530.1	T28(Phospho); S30(Phospho)	4132.96	0.011505	0.277794	2.89535	0.15536	S(17): 53.4; Y(23): 53.4; T(28): 46.6; S(30): 46.6
AT1G78060.1	Glycosyl hydrolase family protein	4.82	1	1	2	2
	Sequence	# PSMs	# Proteins	# Protein Groups	Protein Group Accessions	Modifications	MH+ [Da]	q-Value	PEP	pRS Score	pRS Probability	pRS Site Probabilities
	LTIDEKISQLVNTAPGIPR	1	1	1	AT1G78060.1	S8(Phospho)	2145.13	0.012504	0.347871	11.6378	0.567337	T(2): 21.6; S(8): 56.7; T(13): 21.6
	KVSETDIDRALLNLFSVR	1	1	1	AT1G78060.1	S16(Phospho)	2156.12			23.3872	0.981159	S(3): 0.9; T(5): 0.9; S(16): 98.1
AT4G24280.1	chloroplast heat shock protein 70-1	57.52	1	15	43	1247
	Sequence	# PSMs	# Proteins	# Protein Groups	Protein Group Accessions	Modifications	MH+ [Da]	q-Value	PEP	pRS Score	pRS Probability	pRS Site Probabilities
	SEVFSTAADGQTSVEINVLQGER	36	2	2	AT4G24280.1;AT5G49910.1		2437.18	0	1.42949e-12
	IELSSLTQTNMSLPFITATADGPK	76	2	2	AT4G24280.1;AT5G49910.1		2535.3	0	2.2816e-10
	IINEPTAASLAYGFDR	28	1	1	AT4G24280.1		1737.88	0	1.95965e-11
	DAIDTKNQADSVVYQTEK	52	2	2	AT4G24280.1;AT5G49910.1		2024.97	0	1.99289e-08
	NQADSVVYQTEK	24	2	2	AT4G24280.1;AT5G49910.1		1381.66	0	3.62842e-06
	FDIDANGILSVSAVDKGTGK	36	1	1	AT4G24280.1		2007.04	0	1.04576e-10
	QFAAEEISAQVLR	32	2	2	AT4G24280.1;AT5G49910.1		1461.77	0	1.28026e-08
	KQDITITGASTLPK	48	2	2	AT4G24280.1;AT5G49910.1		1472.83	0	0.00213725
	QAVVNPENTFFSVKR	68	2	2	AT4G24280.1;AT5G49910.1		1735.92	0	2.85784e-05
	DEVDQMVQEAER	24	1	1	AT4G24280.1		1448.63	0	5.78682e-05
	QDITITGASTLPK	20	2	2	AT4G24280.1;AT5G49910.1		1344.74	0	4.19358e-06
	VVGIDLGTTNSAVAAMEGGKPTIVTNAEGQR	8	2	2	AT4G24280.1;AT5G49910.1		3056.57	0	3.72196e-06
	DAMAALNQEVMQIGQSLYNQPGAGGPGAGPSPGGEGASSGDSSSSK	12	1	1	AT4G24280.1		4319.94	0	3.68254e-05
	QFAAEEISAQVLRK	60	2	2	AT4G24280.1;AT5G49910.1		1589.86	0	1.21203e-05
	AKFEELCSDLLDR	48	1	1	AT4G24280.1	C7(Carbamidomethyl)	1595.77	0	1.00625e-05
	FEELCSDLLDR	24	2	2	AT4G24280.1;AT5G49910.1	C5(Carbamidomethyl)	1396.64	0	0.000120993
	LECPAINKQFAAEEISAQVLRK	48	1	1	AT4G24280.1	C3(Carbamidomethyl)	2515.34	0	1.6333e-08
	IAGLEVLR	24	2	2	AT4G24280.1;AT5G49910.1		870.54	0	0.000453679
	IPAVQELVR	24	1	1	AT4G24280.1		1024.61	0	0.000332073
	IELSSLTQTNMSLPFITATADGPKHIETTLTR	48	2	2	AT4G24280.1;AT5G49910.1		3486.82	0	5.56077e-08
	IELSSLTQTNMSLPFITATADGPK	10	2	2	AT4G24280.1;AT5G49910.1	M11(Oxidation)	2551.29	0	1.23686e-06
	AVITVPAYFNDSQR	48	2	2	AT4G24280.1;AT5G49910.1		1580.81	0	6.80656e-07
	LECPAINKQFAAEEISAQVLR	36	1	1	AT4G24280.1	C3(Carbamidomethyl)	2387.24	0	3.6592e-16
	RQAVVNPENTFFSVKR	20	2	2	AT4G24280.1;AT5G49910.1		1892.02	0	0.00141891
	LSFKDIDEVILVGGSTRIPAVQELVR	48	1	1	AT4G24280.1		2854.6	0	6.99193e-07
	VVDWLAAEFKK	20	1	1	AT4G24280.1		1305.72	0	0.000107921
	QAVVNPENTFFSVK	24	2	2	AT4G24280.1;AT5G49910.1		1579.81	0	3.28178e-06
	GTGKKQDITITGASTLPK	28	2	2	AT4G24280.1;AT5G49910.1		1816.01	0	0.000175865
	DIDEVILVGGSTR	40	2	2	AT4G24280.1;AT5G49910.1		1373.73	0	2.76403e-06
	LSFKDIDEVILVGGSTR	24	2	2	AT4G24280.1;AT5G49910.1		1849.01	0	5.85764e-05
	IELSSLTQTNMSLPFITATADGPKHIETTLTR	6	2	2	AT4G24280.1;AT5G49910.1	N10(Deamidated)	3487.82	0	3.25972e-05
	VVGIDLGTTNSAVAAMEGGKPTIVTNAEGQR	4	2	2	AT4G24280.1;AT5G49910.1	M16(Oxidation)	3072.57	0	8.29084e-11
	DEVDQMVQEAER	3	1	1	AT4G24280.1	M6(Oxidation)	1464.62	0	9.34244e-06
	AKIELSSLTQTNMSLPFITATADGPKHIETTLTR	8	2	2	AT4G24280.1;AT5G49910.1		3685.94	0	0.000120757
	IELSSLTQTNMSLPFITATADGPK	2	2	2	AT4G24280.1;AT5G49910.1	N10(Deamidated)	2536.28	0	1.45348e-06
	SGDRLVGQIAKR	16	1	1	AT4G24280.1		1299.75	0	0.000216671
	RQAVVNPENTFFSVK	12	2	2	AT4G24280.1;AT5G49910.1		1735.91	0	0.00718201
	DAMAALNQEVMQIGQSLYNQPGAGGPGAGPSPGGEGASSGDSSSSK	30	1	1	AT4G24280.1	Q8(Deamidated); Q20(Deamidated)	4321.94	0	1.55829e-08
	IELSSLTQTNMSLPFITATADGPKHIETTLTR	1	2	2	AT4G24280.1;AT5G49910.1	Q8(Deamidated); N10(Deamidated)	3488.8	0	0.00231468
	DAIDTKNQADSVVYQTEKQLK	4	2	2	AT4G24280.1;AT5G49910.1		2394.21	0	1.22544e-06
	DAMAALNQEVMQIGQSLYNQPGAGGPGAGPSPGGEGASSGDSSSSK	12	1	1	AT4G24280.1	N19(Deamidated)	4320.93	0	8.15489e-10
	DAMAALNQEVMQIGQSLYNQPGAGGPGAGPSPGGEGASSGDSSSSK	6	1	1	AT4G24280.1	N7(Deamidated); Q8(Deamidated); Q12(Deamidated)	4322.91	0	0.00013194
	LECPAINKQFAAEEISAQVLR	3	1	1	AT4G24280.1	C3(Carbamidomethyl); N7(Deamidated)	2388.24	0	8.47516e-06
	ELGEKIPGEVK	40	1	1	AT4G24280.1		1198.67	7.5e-05	0.00142357
	ELGEKIPGEVKEK	12	1	1	AT4G24280.1		1455.8	7.5e-05	0.000465458
	DEGIDLLK	24	2	2	AT4G24280.1;AT5G49910.1		902.483	7.8e-05	0.00132416
	VRTPVENSLR	8	2	2	AT4G24280.1;AT5G49910.1		1170.66	0.000302	0.00698423
	LVGQIAKR	4	2	2	AT4G24280.1;AT5G49910.1		884.567	0.000644	0.0098965
	LSFKDIDEVILVGGSTRIPAVQELVR	1	1	1	AT4G24280.1	Q22(Deamidated)	2855.6	0.000954	0.0213317
	IINEPTAASLAYGFDRK	4	1	1	AT4G24280.1		1865.98	0.001647	0.0365157
	HIETTLTR	4	2	2	AT4G24280.1;AT5G49910.1		970.529	0.004323	0.11389
	GVPQIEVKFDIDANGILSVSAVDKGTGK	2	1	1	AT4G24280.1	T26(Phospho)	2937.49	0.013234	0.310854	6.2683	0.212293	S(18): 57.5; S(20): 21.2; T(26): 21.2
	SAFFGTRTGPFSTPTSAFLR	1	1	1	AT4G24280.1	T13(Phospho)	2228.05	0.410037	1	21.1262	0.0106733	S(1): 0.0; T(6): 0.0; T(8): 0.0; S(12): 0.3; T(13): 1.1; T(15): 16.9; S(16): 81.6
	SLGSFRLDGIPPAPR	1	2	2	AT4G24280.1;AT5G49910.1	S4(Phospho)	1662.84	0.634041	1	7.47523	0.31004	S(1): 69.0; S(4): 31.0
	KQDITITGASTLPK	1	2	2	AT4G24280.1;AT5G49910.1	Q2(Deamidated)	1473.82
AT4G39690.1	FUNCTIONS IN: molecular_function unknown; INVOLVED IN: biological_process unknown; LOCATED IN: mitochondrion; EXPRESSED IN: 26 plant structures; EXPRESSED DURING: 14 growth stages; CONTAINS InterPro DOMAIN/s: Mitochondrial inner membrane protein Mitofilin (InterPro:IPR019133); Has 30201 Blast hits to 17322 proteins in 780 species: Archae - 12; Bacteria - 1396; Metazoa - 17338; Fungi - 3422; Plant…	21.54	1	6	8	69
	Sequence	# PSMs	# Proteins	# Protein Groups	Protein Group Accessions	Modifications	MH+ [Da]	q-Value	PEP	pRS Score	pRS Probability	pRS Site Probabilities
	DSILGLVLSSLPEEAR	20	1	1	AT4G39690.1		1698.93	0	3.6592e-16
	LEEAHHLNVPSGVEDSTEKDGK	12	1	1	AT4G39690.1		2391.14	0	8.21025e-06
	LEEAHHLNVPSGVEDSTEK	17	1	1	AT4G39690.1		2091	0	0.0012254
	AEINLPISASEDSGAKPDMPSEIISEAESVK	3	1	1	AT4G39690.1	N4(Deamidated)	3215.56	0	2.98227e-09
	AEINLPISASEDSGAKPDMPSEIISEAESVK	8	1	1	AT4G39690.1		3214.57	0	6.70015e-07
	LAEAAATLEEGVKGSK	1	1	1	AT4G39690.1		1573.83	0.000196	0.00807732
	GTLRHFSLIPPGGGGILAHSLAHVASSLK	6	1	1	AT4G39690.1	S7(Phospho); S26(Phospho)	3053.53	0.013502	0.280779	2.33615	0.0990727	T(2): 46.1; S(7): 46.1; S(20): 34.1; S(26): 36.9; S(27): 36.9
	HFSLIPPGGGGILAHSLAHVASSLKFK	1	1	1	AT4G39690.1	S16(Phospho)	2821.51	0.304034	1	2.45851	0.202324	S(3): 56.8; S(16): 20.2; S(22): 11.5; S(23): 11.5
	AAQIEKMAEADLNIKALSMAFYAR	1	1	1	AT4G39690.1	Q3(Deamidated)	2656.35
AT3G12345.1	unknown protein; LOCATED IN: chloroplast; Has 35333 Blast hits to 34131 proteins in 2444 species: Archae - 798; Bacteria - 22429; Metazoa - 974; Fungi - 991; Plants - 531; Viruses - 0; Other Eukaryotes - 9610 (source: NCBI BLink).	15.05	1	1	1	2
	Sequence	# PSMs	# Proteins	# Protein Groups	Protein Group Accessions	Modifications	MH+ [Da]	q-Value	PEP	pRS Score	pRS Probability	pRS Site Probabilities
	GSSGSPSKGTGIYLPPVSLKEAVSGGLK	2	1	1	AT3G12345.1	Y13(Phospho)	2753.42	0.014871	0.306679	5.85025	0.0702134	S(2): 7.0; S(3): 7.0; S(5): 15.7; S(7): 41.3; T(10): 15.7; Y(13): 7.0; S(18): 2.5; S(24): 3.8
AT1G23740.1	Oxidoreductase, zinc-binding dehydrogenase family protein	4.15	1	1	1	1
	Sequence	# PSMs	# Proteins	# Protein Groups	Protein Group Accessions	Modifications	MH+ [Da]	q-Value	PEP	pRS Score	pRS Probability	pRS Site Probabilities
	NAALATTTATTPVLRR	1	1	1	AT1G23740.1	T8(Phospho)	1736.91	0.015443	0.409855	40.0507	0.594853	T(6): 12.5; T(7): 12.5; T(8): 59.5; T(10): 12.5; T(11): 3.0
AT1G31730.1	Adaptin family protein	16.95	1	6	8	128
	Sequence	# PSMs	# Proteins	# Protein Groups	Protein Group Accessions	Modifications	MH+ [Da]	q-Value	PEP	pRS Score	pRS Probability	pRS Site Probabilities
	QMGVNPTSQNPTLFK	24	1	1	AT1G31730.1		1661.83	0	6.33808e-07
	WGRPSYQSTTAASSTTPQAANGISTHSDAGVGSSSSKPR	28	1	1	AT1G31730.1		3892.86	0	8.21793e-09
	WGRPSYQSTTAASSTTPQAANGISTHSDAGVGSSSSKPR	9	1	1	AT1G31730.1	Q18(Deamidated)	3893.84	0	2.78878e-05
	FEAYELPKPSVPPQASNELVPVPEPSYYSESHQPISTSLVSER	8	1	1	AT1G31730.1		4785.34	0	0.000100996
	FEAYELPKPSVPPQASNELVPVPEPSYYSESHQPISTSLVSER	6	1	1	AT1G31730.1	Q14(Deamidated); Q33(Deamidated)	4787.36	0	0.000339898
	FEAYELPKPSVPPQASNELVPVPEPSYYSESHQPISTSLVSER	3	1	1	AT1G31730.1	Q33(Deamidated)	4786.35	0	0.000868657
	IVLSEVDILK	8	1	1	AT1G31730.1		1128.69	7.5e-05	0.00112061
	SGMFETTDYHPQDHHEVPTHALR	4	1	1	AT1G31730.1		2705.21	7.5e-05	0.000196522
	EFLDLVK	20	1	1	AT1G31730.1		863.487	0.000992	0.0265733
	WGRPSYQSTTAASSTTPQAANGISTHSDAGVGSSSSKPR	1	1	1	AT1G31730.1	S5(Phospho); Y6(Phospho); S8(Phospho); T16(Phospho); S24(Phospho); T25(Phospho); S27(Phospho); S33(Phospho); S34(Phospho); S35(Phospho); S36(Phospho)	4772.47	0.017271	0.348615			Too many isoforms
	SSSGGHKPAKGTANKTATVPK	5	1	1	AT1G31730.1	S3(Phospho)	2104.06	0.674358	1	1.44649e-14	0.0200744	S(1): 2.0; S(2): 2.0; S(3): 2.0; T(12): 2.0; T(16): 15.0; T(18): 77.0
	RSSSGGHKPAK	12	1	1	AT1G31730.1		1111.6
AT4G21210.1	PPDK regulatory protein	57.07	3	17	17	428
	Sequence	# PSMs	# Proteins	# Protein Groups	Protein Group Accessions	Modifications	MH+ [Da]	q-Value	PEP	pRS Score	pRS Probability	pRS Site Probabilities
	TDVSTLDSDVSSSSNGVSEADMTAAK	60	2	1	AT4G21210.1		2574.13	0	2.51925e-08
	GCPVNTHLFSGIEDGEK	16	2	1	AT4G21210.1	C2(Carbamidomethyl)	1859.85	0	4.40458e-08
	LDSTITNGSNNTTGPMRPIESSSR	5	2	1	AT4G21210.1	M16(Oxidation)	2551.2	0	9.41584e-08
	EGAMVIYTLADPSMAEATMR	16	2	1	AT4G21210.1		2156.99	0	3.90866e-09
	ADIVLVGVSR	28	3	1	AT4G21210.1		1028.61	0	7.14037e-05
	IPSLDILGPITESISSHLGTNPSGLSR	100	2	1	AT4G21210.1		2761.47	0	2.51238e-08
	LDSTITNGSNNTTGPMRPIESSSR	32	2	1	AT4G21210.1		2535.21	0	3.18129e-08
	KVFGLMINPLVLQGIR	24	1	1	AT4G21210.1		1798.08	0	1.38565e-06
	TLFEIDPR	24	1	1	AT4G21210.1		990.526	0	0.00132211
	IEAIEFTIK	24	3	1	AT4G21210.1		1063.6	0	0.000953994
	TGKTPLSTYLAQK	20	3	1	AT4G21210.1		1407.78	0	1.92443e-05
	TDVSTLDSDVSSSSNGVSEADMTAAK	1	2	1	AT4G21210.1	M22(Oxidation)	2590.13	0	5.92363e-12
	GITNSSLNEDYFK	16	2	1	AT4G21210.1		1487.7	0	2.89794e-05
	VSNVPIVNGVDLPK	16	1	1	AT4G21210.1		1450.83	0	7.82768e-05
	KVFGLMINPLVLQGIR	5	1	1	AT4G21210.1	M6(Oxidation)	1814.07	0	1.34432e-08
	GYKVSNVPIVNGVDLPK	16	1	1	AT4G21210.1		1799.01	0	0.00187056
	AKSLGLGSSFK	12	2	1	AT4G21210.1		1094.62	0	0.000630479
	GITNSSLNEDYFKR	8	2	1	AT4G21210.1		1643.79	0	8.51596e-06
	IEAIEFTIKHDDGALPENLEK	4	2	1	AT4G21210.1		2382.22	0	0.000580532
	ACKLWKIPSLDILGPITESISSHLGTNPSGLSR	1	2	1	AT4G21210.1	C2(Carbamidomethyl); S9(Phospho); S32(Phospho)	3707.83	0.018264	0.372052	5.96616	0.0798797	S(9): 31.0; T(17): 31.0; S(19): 19.0; S(21): 19.0; S(22): 19.0; T(26): 19.0; S(29): 31.0; S(32): 31.0
AT3G06510.1	Glycosyl hydrolase superfamily protein	6.11	2	2	2	8
	Sequence	# PSMs	# Proteins	# Protein Groups	Protein Group Accessions	Modifications	MH+ [Da]	q-Value	PEP	pRS Score	pRS Probability	pRS Site Probabilities
	TLLIWPLIMK	4	2	1	AT3G06510.1		1227.75	0.000703	0.017942
	MELFALLIKVAGLLATVTVGANVVSYSR	4	2	1	AT3G06510.1	S27(Phospho)	3015.64	0.018763	0.369721	2.53472	0.2	T(16): 20.0; T(18): 20.0; S(25): 20.0; Y(26): 20.0; S(27): 20.0
AT2G26890.1	DNAJ heat shock N-terminal domain-containing protein	3.29	1	2	3	10
	Sequence	# PSMs	# Proteins	# Protein Groups	Protein Group Accessions	Modifications	MH+ [Da]	q-Value	PEP	pRS Score	pRS Probability	pRS Site Probabilities
	LTGLCADESLTPYNATAADVLKALLTPK	7	1	1	AT2G26890.1	T2(Phospho); C5(Carbamidomethyl); T16(Phospho)	3106.49	0.019559	0.495046	3.56801e-14	0.0434067	T(2): 21.7; S(9): 35.7; T(11): 35.7; Y(13): 35.7; T(16): 35.7; T(26): 35.7
	RETMSSGEVKAEEIGSDGVNESTDPSSLPGQTPQER	1	1	1	AT2G26890.1	S22(Phospho); T23(Phospho); S26(Phospho)	4044.64	0.030972	0.552894	17.4839	0.083492	T(3): 4.2; S(5): 4.2; S(6): 5.5; S(16): 8.8; S(22): 55.5; T(23): 55.5; S(26): 55.5; S(27): 55.5; T(32): 55.5
	IDNYEVVIVRPLSSVSSLVR	2	1	1	AT2G26890.1	S14(Phospho)	2325.23	0.289193	1	16.4239	0.0887425	Y(4): 64.5; S(13): 8.9; S(14): 8.9; S(16): 8.9; S(17): 8.9
ATMG00285.1	NADH dehydrogenase 2A	2.2	1	1	1	7
	Sequence	# PSMs	# Proteins	# Protein Groups	Protein Group Accessions	Modifications	MH+ [Da]	q-Value	PEP	pRS Score	pRS Probability	pRS Site Probabilities
	KSEFSTEAGSK	7	1	1	ATMG00285.1	T6(Phospho)	1250.52	0.019997	0.395345	5.5952	0.305276	S(2): 8.4; S(5): 30.5; T(6): 30.5; S(10): 30.5
AT5G22330.1	P-loop containing nucleoside triphosphate hydrolases superfamily protein	11.79	1	2	2	17
	Sequence	# PSMs	# Proteins	# Protein Groups	Protein Group Accessions	Modifications	MH+ [Da]	q-Value	PEP	pRS Score	pRS Probability	pRS Site Probabilities
	EAAGLVVDMIK	16	1	1	AT5G22330.1		1145.62	7.5e-05	0.000350347
	ALLLAGPPGTGKTALALGISQELGSKVPFCPMVGSEVYSSEVK	1	1	1	AT5G22330.1	T10(Phospho); C30(Carbamidomethyl); S35(Phospho); S39(Phospho); S40(Phospho)	4679.16	0.023714	0.438322	2.26389	0.0172972	T(10): 50.0; T(13): 50.0; S(20): 50.0; S(25): 50.0; S(35): 50.0; Y(38): 50.0; S(39): 50.0; S(40): 50.0
AT5G52790.1	CBS domain-containing protein with a domain of unknown function (DUF21)	3.2	1	1	1	2
	Sequence	# PSMs	# Proteins	# Protein Groups	Protein Group Accessions	Modifications	MH+ [Da]	q-Value	PEP	pRS Score	pRS Probability	pRS Site Probabilities
	LLDLLLGKRHSTLLGR	2	1	1	AT5G52790.1	T12(Phospho)	1885.08	0.023892	0.399365	51.1407	0.983166	S(11): 1.7; T(12): 98.3
AT4G17890.2	ARF-GAP domain 8	15.63	2	2	2	45
	Sequence	# PSMs	# Proteins	# Protein Groups	Protein Group Accessions	Modifications	MH+ [Da]	q-Value	PEP	pRS Score	pRS Probability	pRS Site Probabilities
	FEYNDDLQSGGQSVGGTQVLNHVAPPK	44	2	1	AT4G17890.2		2857.37	0	4.65524e-06
	AIAEETNSGLLSSPVATSQLPEVSNGVSSYSVK	1	2	1	AT4G17890.2	T6(Phospho); S8(Phospho); S12(Phospho)	3561.57	0.025019	0.404121	2.23689	0.00793941	T(6): 25.5; S(8): 25.5; S(12): 25.5; S(13): 25.5; T(17): 24.5; S(18): 24.5; S(24): 29.0; S(28): 30.0; S(29): 30.0; Y(30): 30.0; S(31): 30.0
AT4G13150.1	unknown protein; Has 83 Blast hits to 82 proteins in 37 species: Archae - 0; Bacteria - 51; Metazoa - 0; Fungi - 0; Plants - 30; Viruses - 0; Other Eukaryotes - 2 (source: NCBI BLink).	8.65	1	1	1	3
	Sequence	# PSMs	# Proteins	# Protein Groups	Protein Group Accessions	Modifications	MH+ [Da]	q-Value	PEP	pRS Score	pRS Probability	pRS Site Probabilities
	VSGKGVPFIVKLGLGLGLAMIITVISVALK	3	1	1	AT4G13150.1	S2(Phospho); T23(Phospho); S26(Phospho)	3233.75	0.028907	0.584482	18.5343	1	S(2): 100.0; T(23): 100.0; S(26): 100.0
AT2G04270.1	RNAse E/G-like	3.01	2	1	1	5
	Sequence	# PSMs	# Proteins	# Protein Groups	Protein Group Accessions	Modifications	MH+ [Da]	q-Value	PEP	pRS Score	pRS Probability	pRS Site Probabilities
	LPQFSVSSRASWLVSSGFPLSSYMFSHVER	5	2	1	AT2G04270.1	S22(Phospho); S26(Phospho)	3548.61	0.028777	0.661851	18.5343	0.130336	S(5): 2.0; S(7): 2.0; S(8): 2.0; S(11): 2.7; S(15): 4.7; S(16): 12.7; S(21): 43.5; S(22): 43.5; Y(23): 43.5; S(26): 43.5
AT5G06370.1	NC domain-containing protein-related	8.88	1	1	1	3
	Sequence	# PSMs	# Proteins	# Protein Groups	Protein Group Accessions	Modifications	MH+ [Da]	q-Value	PEP	pRS Score	pRS Probability	pRS Site Probabilities
	RLSSGLFQVLDPPLAAIALPSTS	3	1	1	AT5G06370.1	S3(Phospho); S4(Phospho); S23(Phospho)	2593.21	0.028907	0.582228	2.93961	0.152499	S(3): 69.0; S(4): 69.0; S(21): 54.0; T(22): 54.0; S(23): 54.0
AT1G06950.1	translocon at the inner envelope membrane of chloroplasts 110	35.73	1	23	26	329
	Sequence	# PSMs	# Proteins	# Protein Groups	Protein Group Accessions	Modifications	MH+ [Da]	q-Value	PEP	pRS Score	pRS Probability	pRS Site Probabilities
	MANAIETAVNQGR	4	1	1	AT1G06950.1	M1(Oxidation)	1390.67	0	1.8154e-09
	MANAIETAVNQGR	32	1	1	AT1G06950.1		1374.68	0	4.53462e-09
	LSNSLVQAVALLR	24	1	1	AT1G06950.1		1383.83	0	4.36676e-07
	LQYLLGIDDSTATALR	8	1	1	AT1G06950.1		1749.93	0	2.10296e-09
	GVGPISLIGDESDFER	28	1	1	AT1G06950.1		1690.83	0	1.23919e-08
	VVVENISSALSILK	8	1	1	AT1G06950.1		1471.87	0	2.23288e-05
	LATSAVVLAASLATGYGLGLR	40	1	1	AT1G06950.1		2004.14	0	5.28627e-10
	DAISSGVDGYDAETR	32	1	1	AT1G06950.1		1555.68	0	1.39749e-06
	YGVNKGDEAFQAEICDIYCR	12	1	1	AT1G06950.1	C15(Carbamidomethyl); C19(Carbamidomethyl)	2408.06	0	6.118e-08
	EAEAISVDVTSK	12	1	1	AT1G06950.1		1248.63	0	4.94939e-05
	KRLANAVSSGDLEAQDSK	24	1	1	AT1G06950.1		1888.97	0	5.15358e-05
	VLEFNNLLVSLK	4	1	1	AT1G06950.1		1388.81	0	0.00112463
	ELTGLQPIVEK	24	1	1	AT1G06950.1		1226.7	0	0.000454799
	LCEELHFDAQK	12	1	1	AT1G06950.1	C2(Carbamidomethyl)	1389.65	0	0.00106103
	AYVTDALSGGR	12	1	1	AT1G06950.1		1109.56	0	0.000260775
	LANAVSSGDLEAQDSK	8	1	1	AT1G06950.1		1604.78	0	8.36624e-06
	SLASVVEELEK	4	1	1	AT1G06950.1		1203.65	0	0.00071526
	MIAFNTLVVTEMVADIKGESSDKAPEEDPVQEK	4	1	1	AT1G06950.1	Q31(Deamidated)	3621.76	0	0.000660208
	YGVNKGDEAFQAEICDIYCR	2	1	1	AT1G06950.1	Q11(Deamidated); C15(Carbamidomethyl); C19(Carbamidomethyl)	2409.06	0	0.000643816
	LQQCVTDGELSDDNVAALLR	1	1	1	AT1G06950.1	Q2(Deamidated); Q3(Deamidated); C4(Carbamidomethyl); N14(Deamidated)	2220.04	8.6e-05	0.00295156
	MIAFNTLVVTEMVADIKGESSDKAPEEDPVQEK	1	1	1	AT1G06950.1	N5(Deamidated); Q31(Deamidated)	3622.76	0.000355	0.0025933
	YVTSVLPTEGQSLKGDEVAK	8	1	1	AT1G06950.1		2121.1	0.000769	0.0199886
	RVFTNYIRR	8	1	1	AT1G06950.1		1224.69	0.001616	0.0546309
	DINVENLVDLRK	4	1	1	AT1G06950.1		1427.79	0.002217	0.0792315
	YVTSVLPTEGQSLK	4	1	1	AT1G06950.1		1521.81	0.006253	0.176933
	DAISSGVDGYDAETRK	4	1	1	AT1G06950.1		1683.78	0.009009	0.215792
	LATSAVVLAASLATGYGLGLR	2	1	1	AT1G06950.1	S11(Phospho); T14(Phospho)	2164.09	0.030431	0.4374	6.06712	0.207635	T(3): 32.9; S(4): 32.9; S(11): 47.8; T(14): 51.7; Y(16): 34.7
	QIRELKEANVSLDSMIAVSLR	1	1	1	AT1G06950.1	S11(Phospho); S19(Phospho)	2532.22	0.192525	0.842894	13.0187	0.225848	S(11): 31.3; S(14): 77.4; S(19): 91.3
	ENAKQLYAERLK	1	1	1	AT1G06950.1	N2(Deamidated); Q5(Deamidated)	1464.76	0.58373	1
	VSFPRSSAASSDQLSVSTQAK	1	1	1	AT1G06950.1	S15(Phospho)	2233.06			9.63439	0.411286	S(2): 5.3; S(6): 5.3; S(7): 5.3; S(10): 5.3; S(11): 5.3; S(15): 41.1; S(17): 16.2; T(18): 16.2
AT4G14370.1	Disease resistance protein (TIR-NBS-LRR class) family	4.37	1	1	2	2
	Sequence	# PSMs	# Proteins	# Protein Groups	Protein Group Accessions	Modifications	MH+ [Da]	q-Value	PEP	pRS Score	pRS Probability	pRS Site Probabilities
	DEHVIAMLADSNLDVKQGLKILTNK	1	1	1	AT4G14370.1	T23(Phospho)	2845.47	0.032434	0.623014	12.372	0.943851	S(11): 5.6; T(23): 94.4
	ESQLEKLWQGTQPLTNLKK	1	1	1	AT4G14370.1	S2(Phospho)	2321.18	0.673504	1	21.6259	0.947519	S(2): 94.8; T(11): 2.6; T(15): 2.6
AT1G30400.1	multidrug resistance-associated protein 1	1.79	1	1	1	4
	Sequence	# PSMs	# Proteins	# Protein Groups	Protein Group Accessions	Modifications	MH+ [Da]	q-Value	PEP	pRS Score	pRS Probability	pRS Site Probabilities
	ADRPTLSNINLDIPLGSLVAVVGSTGEGK	4	1	1	AT1G30400.1	S17(Phospho); T25(Phospho)	3053.48	0.034901	0.74425	2.25667	0.0394764	T(5): 28.7; S(7): 69.9; S(17): 57.0; S(24): 22.2; T(25): 22.2
AT4G28000.1	P-loop containing nucleoside triphosphate hydrolases superfamily protein	2.53	1	2	2	2
	Sequence	# PSMs	# Proteins	# Protein Groups	Protein Group Accessions	Modifications	MH+ [Da]	q-Value	PEP	pRS Score	pRS Probability	pRS Site Probabilities
	IMVGLPSVESR	1	1	1	AT4G28000.1	M2(Oxidation)	1203.64	0.01697	0.390059
	HTRNLAPGSK	1	1	1	AT4G28000.1	S9(Phospho)	1160.55	0.087938	0.886789	51.2213	0.99997	T(2): 0.0; S(9): 100.0
AT2G33240.1	myosin XI D	1.92	1	1	1	3
	Sequence	# PSMs	# Proteins	# Protein Groups	Protein Group Accessions	Modifications	MH+ [Da]	q-Value	PEP	pRS Score	pRS Probability	pRS Site Probabilities
	LPHLYGNEIMEQYKGTDFGELSPHPFAVADSAYR	3	1	1	AT2G33240.1	T16(Phospho); S31(Phospho)	4012.76	0.037465	0.667358	9.64327e-15	0.0666667	Y(5): 33.3; Y(13): 33.3; T(16): 33.3; S(22): 33.3; S(31): 33.3; Y(33): 33.3
AT1G17100.1	SOUL heme-binding family protein	44.4	1	6	6	130
	Sequence	# PSMs	# Proteins	# Protein Groups	Protein Group Accessions	Modifications	MH+ [Da]	q-Value	PEP	pRS Score	pRS Probability	pRS Site Probabilities
	IECPSYELVHSGNGYEIR	36	1	1	AT1G17100.1	C3(Carbamidomethyl)	2122.98	0	1.25119e-07
	SKEDGGVGSDSAYTVAQYNSPFEFSGR	36	1	1	AT1G17100.1		2855.27	0	2.36162e-06
	TAFFQLFAYIQGK	24	1	1	AT1G17100.1		1533.81	0	1.60599e-06
	KNQPDPAPSENLHIQK	28	1	1	AT1G17100.1		1815.93	0	1.26986e-08
	IECPSYELVHSGNGYEIRR	4	1	1	AT1G17100.1	C3(Carbamidomethyl)	2279.08	0	0.00217282
	LSFLLSLLSGGSDLLGPDAESGVAQIGK	2	1	1	AT1G17100.1	S21(Phospho)	2824.43	0.038178	0.67092	6.03843	0.419722	S(2): 20.1; S(6): 12.6; S(9): 12.6; S(12): 12.6; S(21): 42.0
AT1G72150.1	PATELLIN 1	22.86	1	8	12	115
	Sequence	# PSMs	# Proteins	# Protein Groups	Protein Group Accessions	Modifications	MH+ [Da]	q-Value	PEP	pRS Score	pRS Probability	pRS Site Probabilities
	IGSTDEPVITDSFK	20	1	1	AT1G72150.1		1508.75	0	0.000156195
	SSFVFVSDFR	8	2	2	AT1G72150.1;AT1G22530.1		1190.58	0	4.11556e-05
	VVVLTAEEVQK	24	1	1	AT1G72150.1		1214.7	0	9.60483e-11
	IVITIDNQTSK	8	1	1	AT1G72150.1		1231.69	0	0.00122677
	VEEEKPAVPAAEEEK	8	1	1	AT1G72150.1		1654.81	0	0.000370586
	VGEPGKIVITIDNQTSKK	4	1	1	AT1G72150.1		1927.08	7.6e-05	0.000360918
	EVTIPTPVAEK	16	1	1	AT1G72150.1		1183.66	0.000162	0.00131469
	EFTAPVTPVK	20	1	1	AT1G72150.1		1088.6	0.000884	0.0182809
	SSFVFVSDFRNAPGLGKR	1	1	1	AT1G72150.1	S7(Phospho)	2064.01	0.039425	0.626425	38.5197	0.980199	S(1): 1.0; S(2): 1.0; S(7): 98.0
	EFTAPVTPVKEEK	4	1	1	AT1G72150.1		1474.78	0.067696	0.837805
	ELFSDKEKLNK	1	1	1	AT1G72150.1	N10(Deamidated)	1351.71	0.25331	0.985049
	EVTPEKEAPAAEAEKSVSVK	1	1	1	AT1G72150.1	T3(Phospho)	2179.04			12.1945	0.87298	T(3): 87.3; S(16): 5.9; S(18): 6.9
AT3G13290.1	varicose-related	15.37	1	4	11	117
	Sequence	# PSMs	# Proteins	# Protein Groups	Protein Group Accessions	Modifications	MH+ [Da]	q-Value	PEP	pRS Score	pRS Probability	pRS Site Probabilities
	LQGEIQPQLEVTPITK	32	3	2	AT3G13300.2;AT3G13290.1		1794	0	1.37224e-06
	TVSSAITESFQR	12	3	2	AT3G13300.2;AT3G13290.1		1325.67	0	5.18249e-06
	EVGEAQTSQNGEINYHETTENHTSESR	28	1	1	AT3G13290.1		3047.32	0	2.58896e-07
	VEAPMDPTTELSR	24	3	2	AT3G13300.2;AT3G13290.1		1445.69	0	2.03544e-05
	ETISSASSVTQALNR	4	1	1	AT3G13290.1		1563.79	0	1.17693e-06
	IDSGQSQLAHTLR	4	1	1	AT3G13290.1		1425.75	0	6.86848e-05
	EVGEAQTSQNGEINYHETTENHTSESR	5	1	1	AT3G13290.1	N10(Deamidated)	3048.31	0	1.53972e-06
	KYEESFTSALQR	4	3	2	AT3G13300.2;AT3G13290.1		1458.73	7.8e-05	0.00259245
	SDSTVSREANLVESTLETSGMKPTELPSVGSVPKPSILVNR	1	1	1	AT3G13290.1	S31(Phospho); S36(Phospho)	4472.17	0.039565	0.792315	4.35481	0.0294984	S(1): 16.4; S(3): 16.4; T(4): 16.4; S(6): 16.4; S(14): 16.4; T(15): 16.4; T(18): 16.4; S(19): 16.4; T(24): 16.4; S(28): 16.4; S(31): 17.9; S(36): 17.9
	DVSAKLPESGSSSGLVATNSK	1	1	1	AT3G13290.1	N19(Deamidated)	2035.01	0.22626	0.963747
	SENANMLSFPAGPASAGITPPAIVPPNGEPK	1	1	1	AT3G13290.1	N3(Deamidated)	3032.48	0.358608	0.981344
	GLDSRDVSAKLPESGSSSGLVATNSK	1	1	1	AT3G13290.1	S14(Phospho); S16(Phospho)	2722.22	0.551857	1	2.56829	0.0394923	S(4): 25.9; S(8): 25.9; S(14): 25.9; S(16): 25.9; S(17): 25.9; S(18): 18.8; T(23): 25.9; S(25): 25.9
AT3G19420.1	PTEN 2	23.73	1	5	9	75
	Sequence	# PSMs	# Proteins	# Protein Groups	Protein Group Accessions	Modifications	MH+ [Da]	q-Value	PEP	pRS Score	pRS Probability	pRS Site Probabilities
	GEATEKPSGAGVNASSSSESEFK	24	1	1	AT3G19420.1		2256.02	0	2.8198e-08
	VSISGNKGSSQPVQGVTVSK	20	1	1	AT3G19420.1		1959.05	0	0.000151973
	FTSGLGIR	16	1	1	AT3G19420.1		850.479	9.3e-05	0.00588522
	LSAAGISNWAK	8	1	1	AT3G19420.1		1117.6	0.004524	0.12897
	VSISGNKGSSQPVQGVTVSKGEATEKPSGAGVNASSSSESEFK	1	1	1	AT3G19420.1	S2(Phospho); S4(Phospho); S9(Phospho); S10(Phospho)	4515.95	0.04077	0.497507			Too many isoforms
	SSESPNLPAAAGTVPDNHPPPPPVVTAAEAGSDDSPKGVASK	1	1	1	AT3G19420.1	T26(Phospho); S32(Phospho); S35(Phospho); S41(Phospho)	4338.81	0.193837	0.844288	0	0.0139245	S(1): 51.3; S(2): 51.3; S(4): 51.3; T(13): 49.2; T(26): 49.2; S(32): 49.2; S(35): 49.2; S(41): 49.2
	SPQTNDTTTEGTSSATESSFIGTITKGLVDTSK	1	1	1	AT3G19420.1	S1(Phospho); T4(Phospho); T31(Phospho); S32(Phospho)	3681.5	0.338917	1			Too many isoforms
	SPQTNDTTTEGTSSATESSFIGTITKGLVDTSKNAVK	1	1	1	AT3G19420.1	S18(Phospho); S19(Phospho); T23(Phospho)	4013.78	0.665383	1			Too many isoforms
	ATEKVSISGNKGSSQPVQGVTVSK	3	1	1	AT3G19420.1	Q15(Deamidated)	2389.25
AT5G15090.1	voltage dependent anion channel 3	66.79	1	9	13	405
	Sequence	# PSMs	# Proteins	# Protein Groups	Protein Group Accessions	Modifications	MH+ [Da]	q-Value	PEP	pRS Score	pRS Probability	pRS Site Probabilities
	ENAITVGTQHALDPLTTVK	48	1	1	AT5G15090.1		2008.07	0	5.74108e-07
	VSTDSSLLTTLTFDEPAPGLK	28	1	1	AT5G15090.1		2192.13	0	0.000371256
	GSLFLGDVATQVK	24	1	1	AT5G15090.1		1334.73	0	7.71249e-07
	SFFTVSGEVDSK	36	1	1	AT5G15090.1		1302.62	0	0.000203682
	VGIALALKP	72	2	2	AT5G15090.1;AT3G01280.1		881.581	0	0.000193049
	LNASYYQIVSPSTVVGAEISHNFTTK	56	1	1	AT5G15090.1		2826.43	0	3.6592e-16
	VKGPGLYTEIGKK	48	2	2	AT3G01280.1;AT5G15090.1		1389.81	0	0.00197504
	VNNAGVANALIQHEWRPK	44	1	1	AT5G15090.1		2017.07	0	5.36091e-08
	LNASYYQIVSPSTVVGAEISHNFTTK	6	1	1	AT5G15090.1	Q7(Deamidated)	2827.43	0	0.000118447
	ARVNNAGVANALIQHEWRPK	20	1	1	AT5G15090.1		2244.21	0.000339	0.00514164
	DDLTASLILNDK	12	1	1	AT5G15090.1		1317.69	0.000542	0.0082911
	FSVTTYSSTGVAITTTGTNK	6	1	1	AT5G15090.1	T5(Phospho)	2115.98	0.040776	0.693624	3.38915	0.0909091	S(2): 9.1; T(4): 9.1; T(5): 9.1; Y(6): 9.1; S(7): 9.1; S(8): 9.1; T(9): 9.1; T(14): 9.1; T(15): 9.1; T(16): 9.1; T(18): 9.1
	NNNFTADVKVSTDSSLLTTLTFDEPAPGLKVIVQAK	1	1	1	AT5G15090.1	T5(Phospho); T21(Phospho)	3993.98			1.92865e-15	0.0357143	T(5): 25.0; S(11): 25.0; T(12): 25.0; S(14): 25.0; S(15): 25.0; T(18): 25.0; T(19): 25.0; T(21): 25.0
	DDLTASLILNDKGEKLNASYYQIVSPSTVVGAEISHNFTTK	4	1	1	AT5G15090.1	Y20(Phospho); T40(Phospho)	4599.21			8.63367	0.0480082	T(4): 17.6; S(6): 17.6; S(19): 17.6; Y(20): 17.6; Y(21): 17.6; S(25): 10.6; S(27): 10.6; T(28): 13.2; S(35): 15.0; T(39): 31.2; T(40): 31.2
AT2G04842.1	threonyl-tRNA synthetase, putative / threonine--tRNA ligase, putative	15.23	1	8	9	67
	Sequence	# PSMs	# Proteins	# Protein Groups	Protein Group Accessions	Modifications	MH+ [Da]	q-Value	PEP	pRS Score	pRS Probability	pRS Site Probabilities
	HTCAHVMAMAVQK	8	1	1	AT2G04842.1	C3(Carbamidomethyl)	1483.7	0	0.000248023
	FGGELGTIPVDDLINK	8	1	1	AT2G04842.1		1687.89	0	4.94124e-06
	NAETQKIPLMAVVGPK	4	1	1	AT2G04842.1		1695.95	0	0.000277555
	VLPVTDNQLEFCK	12	1	1	AT2G04842.1	C12(Carbamidomethyl)	1562.79	7.5e-05	0.000586967
	IRHTCAHVMAMAVQK	16	1	1	AT2G04842.1	C5(Carbamidomethyl)	1752.88	7.6e-05	0.000537681
	AELCHGERLPK	8	1	1	AT2G04842.1	C4(Carbamidomethyl)	1309.67	0.000227	0.00315364
	SRFGGELGTIPVDDLINKINIAVETR	4	1	1	AT2G04842.1		2827.54	0.000517	0.00863157
	MEILDGIK	4	1	1	AT2G04842.1		918.498	0.001759	0.0494079
	SRFGGELGTIPVDDLINKINIAVETR	1	1	1	AT2G04842.1	S1(Phospho); T9(Phospho); T25(Phospho)	3067.43	0.041246	0.630782	38.363	1	S(1): 100.0; T(9): 100.0; T(25): 100.0
	NAETQKIPLMAVVGPKEVETGTVTVR	2	1	1	AT2G04842.1	T22(Phospho)	2847.45			4.05018e-14	0.25	T(4): 25.0; T(20): 25.0; T(22): 25.0; T(24): 25.0
AT2G39730.1	rubisco activase	85.23	2	4	70	8543
	Sequence	# PSMs	# Proteins	# Protein Groups	Protein Group Accessions	Modifications	MH+ [Da]	q-Value	PEP	pRS Score	pRS Probability	pRS Site Probabilities
	VQLAETYLSQAALGDANADAIGR	324	3	2	AT2G39730.1;AT2G39730.2		2347.19	0	9.13333e-13
	MGINPIMMSAGELESGNAGEPAK	215	3	2	AT2G39730.1;AT2G39730.2	M7(Oxidation)	2320.06	0	5.13197e-10
	LMEYGNMLVMEQENVK	168	3	2	AT2G39730.1;AT2G39730.2		1927.9	0	4.01511e-08
	LMEYGNMLVMEQENVK	77	3	2	AT2G39730.1;AT2G39730.2	M2(Oxidation); M10(Oxidation)	1959.89	0	1.77202e-05
	VQLAETYLSQAALGDANADAIGRGTFYGK	120	3	2	AT2G39730.1;AT2G39730.2		3000.5	0	4.4127e-11
	LMEYGNMLVMEQENVK	12	3	2	AT2G39730.1;AT2G39730.2	M2(Oxidation); M7(Oxidation); M10(Oxidation)	1975.88	0	4.01462e-10
	LMEYGNMLVMEQENVKR	180	3	2	AT2G39730.1;AT2G39730.2		2083.99	0	4.76808e-09
	MGINPIMMSAGELESGNAGEPAK	207	3	2	AT2G39730.1;AT2G39730.2	M7(Oxidation); M8(Oxidation)	2336.06	0	9.84527e-09
	MGINPIMMSAGELESGNAGEPAK	172	3	2	AT2G39730.1;AT2G39730.2		2304.06	0	2.00031e-07
	DEDIVTLVDQFPGQSIDFFGALR	136	3	2	AT2G39730.1;AT2G39730.2		2582.27	0	1.06686e-06
	MGINPIMMSAGELESGNAGEPAK	36	3	2	AT2G39730.1;AT2G39730.2	M1(Oxidation); M7(Oxidation); M8(Oxidation)	2352.05	0	3.11729e-09
	VPIICTGNDFSTLYAPLIR	224	3	2	AT2G39730.1;AT2G39730.2	C5(Carbamidomethyl)	2150.14	0	3.92855e-12
	RVQLAETYLSQAALGDANADAIGRGTFYGK	80	3	2	AT2G39730.1;AT2G39730.2		3156.6	0	1.16108e-12
	GLAYDTSDDQQDITR	188	3	2	AT2G39730.1;AT2G39730.2		1697.76	0	1.41604e-09
	LMEYGNMLVMEQENVK	77	3	2	AT2G39730.1;AT2G39730.2	M10(Oxidation)	1943.89	0	2.28641e-05
	MCCLFINDLDAGAGR	144	3	2	AT2G39730.1;AT2G39730.2	C2(Carbamidomethyl); C3(Carbamidomethyl)	1712.76	0	4.52904e-06
	MCCLFINDLDAGAGR	37	3	2	AT2G39730.1;AT2G39730.2	M1(Oxidation); C2(Carbamidomethyl); C3(Carbamidomethyl)	1728.75	0	2.74522e-08
	LMEYGNMLVMEQENVKR	118	3	2	AT2G39730.1;AT2G39730.2	M2(Oxidation)	2099.99	0	4.16502e-06
	KGKMCCLFINDLDAGAGR	68	3	2	AT2G39730.1;AT2G39730.2	C5(Carbamidomethyl); C6(Carbamidomethyl)	2025.97	0	6.62329e-10
	GKGMVDSVFQAPMGTGTHHAVLSSYEYVSQGLR	86	3	2	AT2G39730.1;AT2G39730.2	M4(Oxidation)	3525.68	0	8.20226e-07
	GKMCCLFINDLDAGAGR	56	3	2	AT2G39730.1;AT2G39730.2	C4(Carbamidomethyl); C5(Carbamidomethyl)	1897.87	0	1.90942e-08
	RVQLAETYLSQAALGDANADAIGR	164	3	2	AT2G39730.1;AT2G39730.2		2503.27	0	5.09576e-07
	QYNLDNMMDGFYIAPAFMDK	29	3	2	AT2G39730.1;AT2G39730.2	M7(Oxidation); M8(Oxidation)	2416.02	0	3.91966e-05
	GLAYDTSDDQQDITRGK	48	3	2	AT2G39730.1;AT2G39730.2		1882.87	0	7.54923e-08
	GKGMVDSVFQAPMGTGTHHAVLSSYEYVSQGLR	17	3	2	AT2G39730.1;AT2G39730.2	M4(Oxidation); M13(Oxidation)	3541.68	0	2.12592e-09
	GKMCCLFINDLDAGAGR	16	3	2	AT2G39730.1;AT2G39730.2	M3(Oxidation); C4(Carbamidomethyl); C5(Carbamidomethyl)	1913.86	0	4.33514e-08
	QYNLDNMMDGFYIAPAFMDK	33	3	2	AT2G39730.1;AT2G39730.2	M18(Oxidation)	2400.03	0	2.5848e-10
	IKDEDIVTLVDQFPGQSIDFFGALR	168	3	2	AT2G39730.1;AT2G39730.2		2823.45	0	8.26991e-08
	EENARVPIICTGNDFSTLYAPLIR	192	3	2	AT2G39730.1;AT2G39730.2	C10(Carbamidomethyl)	2749.4	0	3.29353e-09
	GMVDSVFQAPMGTGTHHAVLSSYEYVSQGLR	100	3	2	AT2G39730.1;AT2G39730.2		3324.57	0	1.27415e-08
	MGINPIMMSAGELESGNAGEPAKLIR	107	3	2	AT2G39730.1;AT2G39730.2	M7(Oxidation)	2702.33	0	4.57389e-07
	EGPPVFEQPEMTYEK	18	3	2	AT2G39730.1;AT2G39730.2	M11(Oxidation)	1796.81	0	8.28058e-07
	KFVESLGVEKIGK	24	3	2	AT2G39730.1;AT2G39730.2		1433.83	0	4.84607e-06
	GMVDSVFQAPMGTGTHHAVLSSYEYVSQGLR	60	3	2	AT2G39730.1;AT2G39730.2	M2(Oxidation)	3340.57	0	0.0012707
	WRGLAYDTSDDQQDITR	64	3	2	AT2G39730.1;AT2G39730.2		2039.93	0	9.58508e-08
	MGINPIMMSAGELESGNAGEPAKLIR	128	3	2	AT2G39730.1;AT2G39730.2		2686.34	0	3.55745e-05
	MGINPIMMSAGELESGNAGEPAKLIR	96	3	2	AT2G39730.1;AT2G39730.2	M7(Oxidation); M8(Oxidation)	2718.33	0	2.71827e-07
	GTFYGKGAQQVNLPVPEGCTDPVAENFDPTAR	120	1	1	AT2G39730.1	C19(Carbamidomethyl)	3435.63	0	7.5121e-11
	MGGTTQYTVNNQMVNATLMNIADNPTNVQLPGMYNK	115	3	2	AT2G39730.1;AT2G39730.2	M1(Oxidation); M13(Oxidation); M19(Oxidation)	3991.82	0	4.3484e-05
	TDKIKDEDIVTLVDQFPGQSIDFFGALR	116	3	2	AT2G39730.1;AT2G39730.2		3167.62	0	4.56138e-10
	EGPPVFEQPEMTYEK	144	3	2	AT2G39730.1;AT2G39730.2		1780.81	0	9.70625e-08
	NFLTLPNIKVPLILGIWGGKGQGK	88	3	2	AT2G39730.1;AT2G39730.2		2563.51	0	5.8106e-10
	MGGTTQYTVNNQMVNATLMNIADNPTNVQLPGMYNK	428	3	2	AT2G39730.1;AT2G39730.2	M19(Oxidation); M33(Oxidation)	3975.83	0	0.000113887
	GAQQVNLPVPEGCTDPVAENFDPTAR	168	1	1	AT2G39730.1	C13(Carbamidomethyl)	2782.31	0	8.28888e-07
	GKGMVDSVFQAPMGTGTHHAVLSSYEYVSQGLR	148	3	2	AT2G39730.1;AT2G39730.2		3509.69	0	2.23903e-08
	NFLTLPNIKVPLILGIWGGK	72	3	2	AT2G39730.1;AT2G39730.2		2193.31	0	4.60099e-08
	QYNLDNMMDGFYIAPAFMDK	72	3	2	AT2G39730.1;AT2G39730.2		2384.04	0	3.07455e-09
	VPLILGIWGGKGQGK	60	3	2	AT2G39730.1;AT2G39730.2		1522.91	0	0.000238323
	KFVESLGVEK	88	3	2	AT2G39730.1;AT2G39730.2		1135.64	0	0.00022814
	IKDEDIVTLVDQFPGQSIDFFGALRAR	64	3	2	AT2G39730.1;AT2G39730.2		3050.61	0	4.87741e-05
	LMEYGNMLVMEQENVKR	79	3	2	AT2G39730.1;AT2G39730.2	M7(Oxidation); M10(Oxidation)	2115.98	0	0.00053446
	MGGTTQYTVNNQMVNATLMNIADNPTNVQLPGMYNK	208	3	2	AT2G39730.1;AT2G39730.2	M33(Oxidation)	3959.83	0	1.50428e-05
	SFQCELVMAK	23	3	2	AT2G39730.1;AT2G39730.2	C4(Carbamidomethyl); M8(Oxidation)	1228.57	0	2.00246e-05
	MGGTTQYTVNNQMVNATLMNIADNPTNVQLPGMYNKEENAR	32	3	2	AT2G39730.1;AT2G39730.2		4543.1	0	1.73911e-05
	LVVHITKNFLTLPNIKVPLILGIWGGK	20	3	2	AT2G39730.1;AT2G39730.2		2983.82	0	1.95015e-07
	MGGTTQYTVNNQMVNATLMNIADNPTNVQLPGMYNK	12	3	2	AT2G39730.1;AT2G39730.2	M1(Oxidation); M13(Oxidation); M19(Oxidation); M33(Oxidation)	4007.81	0	2.93552e-09
	MGGTTQYTVNNQMVNATLMNIADNPTNVQLPGMYNK	152	3	2	AT2G39730.1;AT2G39730.2		3943.85	0	8.29165e-09
	QYNLDNMMDGFYIAPAFMDKLVVHITK	12	3	2	AT2G39730.1;AT2G39730.2		3174.53	0	5.203e-07
	SFQCELVMAK	48	3	2	AT2G39730.1;AT2G39730.2	C4(Carbamidomethyl)	1212.58	0	3.92623e-06
	VPIICTGNDFSTLYAPLIRDGR	28	3	2	AT2G39730.1;AT2G39730.2	C5(Carbamidomethyl)	2478.28	0	2.2252e-06
	VYDDEVRKFVESLGVEK	32	3	2	AT2G39730.1;AT2G39730.2		2012.03	0	6.03985e-06
	EGPPVFEQPEMTYEKLMEYGNMLVMEQENVK	48	3	2	AT2G39730.1;AT2G39730.2		3689.67	0	5.99368e-07
	WRGLAYDTSDDQQDITRGK	24	3	2	AT2G39730.1;AT2G39730.2		2225.05	0	7.95801e-10
	MGINPIMMSAGELESGNAGEPAKLIR	15	3	2	AT2G39730.1;AT2G39730.2	M1(Oxidation); M7(Oxidation); M8(Oxidation)	2734.32	0	1.18565e-09
	VPLILGIWGGK	24	3	2	AT2G39730.1;AT2G39730.2		1152.71	0	0.000669638
	MGINPIMMSAGELESGNAGEPAKLIRQR	32	3	2	AT2G39730.1;AT2G39730.2		2970.5	0	4.2009e-05
	DEDIVTLVDQFPGQSIDFFGALRAR	76	3	2	AT2G39730.1;AT2G39730.2		2809.41	0	5.75301e-07
	FVESLGVEK	48	3	2	AT2G39730.1;AT2G39730.2		1007.54	0	3.23172e-05
	ARVYDDEVR	28	3	2	AT2G39730.1;AT2G39730.2		1122.55	0	0.000325497
	IGVCKGIFR	24	3	2	AT2G39730.1;AT2G39730.2	C4(Carbamidomethyl)	1049.59	0	0.000144932
	LVVHITK	24	3	2	AT2G39730.1;AT2G39730.2		809.525	0	0.00279271
	GQGKSFQCELVMAK	4	3	2	AT2G39730.1;AT2G39730.2	C8(Carbamidomethyl)	1582.77	0	0.000724489
	IGVCKGIFRTDK	32	3	2	AT2G39730.1;AT2G39730.2	C4(Carbamidomethyl)	1393.76	0	0.00115029
	GMVDSVFQAPMGTGTHHAVLSSYEYVSQGLR	12	3	2	AT2G39730.1;AT2G39730.2	M2(Oxidation); M11(Oxidation)	3356.57	0	9.26493e-06
	MEKFYWAPTR	16	3	2	AT2G39730.1;AT2G39730.2		1328.64	0	0.000526075
	EENARVPIICTGNDFSTLYAPLIRDGR	40	3	2	AT2G39730.1;AT2G39730.2	C10(Carbamidomethyl)	3077.54	0	2.96625e-05
	VYDDEVR	24	3	2	AT2G39730.1;AT2G39730.2		895.415	0	0.000964653
	LMEYGNMLVMEQENVKR	6	3	2	AT2G39730.1;AT2G39730.2	M2(Oxidation); M7(Oxidation); M10(Oxidation)	2131.98	0	0.000105541
	YREAADLIKK	48	3	2	AT2G39730.1;AT2G39730.2		1206.69	0	9.42895e-05
	EGPPVFEQPEMTYEKLMEYGNMLVMEQENVKR	19	3	2	AT2G39730.1;AT2G39730.2	M17(Oxidation)	3861.79	0	6.04792e-05
	KGKMCCLFINDLDAGAGR	11	3	2	AT2G39730.1;AT2G39730.2	M4(Oxidation); C5(Carbamidomethyl); C6(Carbamidomethyl)	2041.96	0	6.81665e-05
	VQLAETYLSQAALGDANADAIGR	48	3	2	AT2G39730.1;AT2G39730.2	Q10(Deamidated)	2348.18	0	1.87374e-12
	MGINPIMMSAGELESGNAGEPAK	16	3	2	AT2G39730.1;AT2G39730.2	N17(Deamidated)	2305.05	0	2.49329e-08
	GLAYDTSDDQQDITR	28	3	2	AT2G39730.1;AT2G39730.2	Q11(Deamidated)	1698.75	0	1.23866e-07
	VQLAETYLSQAALGDANADAIGRGTFYGK	18	3	2	AT2G39730.1;AT2G39730.2	N17(Deamidated)	3001.51	0	3.64284e-06
	LMEYGNMLVMEQENVK	27	3	2	AT2G39730.1;AT2G39730.2	N6(Deamidated)	1928.88	0	0.0029902
	VPIICTGNDFSTLYAPLIR	18	3	2	AT2G39730.1;AT2G39730.2	C5(Carbamidomethyl); N8(Deamidated)	2151.11	0	7.68284e-09
	MGINPIMMSAGELESGNAGEPAKLIR	24	3	2	AT2G39730.1;AT2G39730.2	N17(Deamidated)	2687.31	0	8.85716e-06
	EGPPVFEQPEMTYEKLMEYGNMLVMEQENVKR	12	3	2	AT2G39730.1;AT2G39730.2	Q8(Deamidated); N21(Deamidated)	3847.78	0	7.00131e-08
	GMVDSVFQAPMGTGTHHAVLSSYEYVSQGLR	25	3	2	AT2G39730.1;AT2G39730.2	Q8(Deamidated)	3325.56	0	0.000875714
	MCCLFINDLDAGAGR	17	3	2	AT2G39730.1;AT2G39730.2	C2(Carbamidomethyl); C3(Carbamidomethyl); N7(Deamidated)	1713.74	0	5.02961e-08
	IKDEDIVTLVDQFPGQSIDFFGALR	36	3	2	AT2G39730.1;AT2G39730.2	Q16(Deamidated)	2824.44	0	2.51008e-07
	QYNLDNMMDGFYIAPAFMDK	3	3	2	AT2G39730.1;AT2G39730.2	N6(Deamidated)	2385.03	0	3.95848e-07
	EGPPVFEQPEMTYEKLMEYGNMLVMEQENVK	14	3	2	AT2G39730.1;AT2G39730.2	Q8(Deamidated)	3690.66	0	2.79104e-05
	EGPPVFEQPEMTYEKLMEYGNMLVMEQENVKR	13	3	2	AT2G39730.1;AT2G39730.2	N21(Deamidated)	3846.79	0	0.000367774
	GTFYGKGAQQVNLPVPEGCTDPVAENFDPTAR	28	1	1	AT2G39730.1	C19(Carbamidomethyl); N26(Deamidated)	3436.61	0	8.82999e-07
	LVVHITKNFLTLPNIKVPLILGIWGGK	2	3	2	AT2G39730.1;AT2G39730.2	N14(Deamidated)	2984.81	0	3.49679e-05
	GAQQVNLPVPEGCTDPVAENFDPTAR	123	1	1	AT2G39730.1	N6(Deamidated); C13(Carbamidomethyl)	2783.29	0	5.70564e-06
	QYNLDNMMDGFYIAPAFMDKLVVHITK	9	3	2	AT2G39730.1;AT2G39730.2	N6(Deamidated)	3175.53	0	1.35619e-06
	EGPPVFEQPEMTYEK	7	3	2	AT2G39730.1;AT2G39730.2	Q8(Deamidated)	1781.79	0	1.63226e-06
	EENARVPIICTGNDFSTLYAPLIR	29	3	2	AT2G39730.1;AT2G39730.2	C10(Carbamidomethyl); N13(Deamidated)	2750.39	0	1.70389e-06
	WRGLAYDTSDDQQDITR	10	3	2	AT2G39730.1;AT2G39730.2	Q12(Deamidated)	2040.92	0	1.1444e-05
	MGGTTQYTVNNQMVNATLMNIADNPTNVQLPGMYNK	309	3	2	AT2G39730.1;AT2G39730.2	N15(Deamidated)	3944.83	0	0.00552207
	MGGTTQYTVNNQMVNATLMNIADNPTNVQLPGMYNKEENAR	40	3	2	AT2G39730.1;AT2G39730.2	Q29(Deamidated)	4544.11	0	2.36291e-05
	GTFYGKGAQQVNLPVPEGCTDPVAENFDPTAR	8	1	1	AT2G39730.1	Q10(Deamidated); N12(Deamidated); C19(Carbamidomethyl); N26(Deamidated)	3438.6	0	0.000460138
	SFQCELVMAK	5	3	2	AT2G39730.1;AT2G39730.2	Q3(Deamidated); C4(Carbamidomethyl)	1213.56	0	3.66344e-05
	GKGMVDSVFQAPMGTGTHHAVLSSYEYVSQGLR	18	3	2	AT2G39730.1;AT2G39730.2	Q10(Deamidated)	3510.66	0	0.00130504
	LMEYGNMLVMEQENVKR	11	3	2	AT2G39730.1;AT2G39730.2	Q12(Deamidated)	2084.98	0	0.000999896
	MGGTTQYTVNNQMVNATLMNIADNPTNVQLPGMYNK	77	3	2	AT2G39730.1;AT2G39730.2	N15(Deamidated); N20(Deamidated)	3945.83	0	6.00883e-06
	ARVYDDEVRK	4	3	2	AT2G39730.1;AT2G39730.2		1250.65	0	0.00040119
	EGPPVFEQPEMTYEKLMEYGNMLVMEQENVKR	28	3	2	AT2G39730.1;AT2G39730.2		3845.78	0	7.43044e-08
	DEDIVTLVDQFPGQSIDFFGALR	14	3	2	AT2G39730.1;AT2G39730.2	Q10(Deamidated)	2583.25	0	2.21033e-07
	MGINPIMMSAGELESGNAGEPAK	1	3	2	AT2G39730.1;AT2G39730.2	N4(Deamidated); N17(Deamidated)	2306.05	0	1.66015e-05
	GTFYGKGAQQVNLPVPEGCTDPVAENFDPTAR	42	1	1	AT2G39730.1	N12(Deamidated); C19(Carbamidomethyl); N26(Deamidated)	3437.62	0	1.9698e-05
	TDKIKDEDIVTLVDQFPGQSIDFFGALR	22	3	2	AT2G39730.1;AT2G39730.2	Q19(Deamidated)	3168.61	0	4.41204e-05
	GMVDSVFQAPMGTGTHHAVLSSYEYVSQGLR	2	3	2	AT2G39730.1;AT2G39730.2	Q8(Deamidated); Q28(Deamidated)	3326.56	0	0.000219849
	GAQQVNLPVPEGCTDPVAENFDPTAR	12	1	1	AT2G39730.1	Q3(Deamidated); C13(Carbamidomethyl); N20(Deamidated)	2784.29	0	0.00257539
	RVQLAETYLSQAALGDANADAIGR	16	3	2	AT2G39730.1;AT2G39730.2	Q11(Deamidated)	2504.29	0	0.00352477
	IKDEDIVTLVDQFPGQSIDFFGALRAR	2	3	2	AT2G39730.1;AT2G39730.2	Q12(Deamidated)	3051.59	0	0.000358137
	RVQLAETYLSQAALGDANADAIGRGTFYGK	7	3	2	AT2G39730.1;AT2G39730.2	N18(Deamidated)	3157.61	0	0.00356879
	SDDGTCVYNF	24	1	1	AT2G39730.1	C6(Carbamidomethyl)	1177.45	0	1.22153e-05
	LVVHITKNFLTLPNIK	12	3	2	AT2G39730.1;AT2G39730.2		1850.12	0	0.000223318
	QTDGDRWRGLAYDTSDDQQDITR	12	3	2	AT2G39730.1;AT2G39730.2		2712.22	0	0.00184653
	EGPPVFEQPEMTYEKLMEYGNMLVMEQENVK	6	3	2	AT2G39730.1;AT2G39730.2	Q8(Deamidated); N21(Deamidated)	3691.65	0	4.24826e-05
	MGGTTQYTVNNQMVNATLMNIADNPTNVQLPGMYNKEENAR	40	3	2	AT2G39730.1;AT2G39730.2	N27(Deamidated); Q29(Deamidated)	4545.1	0	2.50719e-06
	DEDIVTLVDQFPGQSIDFFGALR	2	3	2	AT2G39730.1;AT2G39730.2	Q10(Deamidated); Q14(Deamidated)	2584.25	0	0.00425783
	IKDEDIVTLVDQFPGQSIDFFGALR	1	3	2	AT2G39730.1;AT2G39730.2	Q12(Deamidated); Q16(Deamidated)	2825.43	0	2.99299e-06
	NFLTLPNIKVPLILGIWGGKGQGK	3	3	2	AT2G39730.1;AT2G39730.2	N7(Deamidated)	2564.51	0	1.33581e-05
	VQLAETYLSQAALGDANADAIGRGTFYGK	6	3	2	AT2G39730.1;AT2G39730.2	Q2(Deamidated); N17(Deamidated)	3002.49	0	0.00217138
	MEKFYWAPTREDR	36	3	2	AT2G39730.1;AT2G39730.2		1728.81	7.6e-05	0.00111033
	VYDDEVRK	4	3	2	AT2G39730.1;AT2G39730.2		1023.51	7.6e-05	0.00116508
	QYNLDNMMDGFYIAPAFMDKLVVHITKNFLTLPNIK	4	3	2	AT2G39730.1;AT2G39730.2		4215.14	7.6e-05	0.000139986
	FYWAPTR	48	3	2	AT2G39730.1;AT2G39730.2		940.468	9.3e-05	0.00357622
	NFLTLPNIK	48	3	2	AT2G39730.1;AT2G39730.2		1059.62	0.000142	0.00463542
	EGPPVFEQPEMTYEKLMEYGNMLVMEQENVK	8	3	2	AT2G39730.1;AT2G39730.2	M25(Oxidation)	3705.69	0.000155	0.00112908
	MGINPIMMSAGELESGNAGEPAKLIRQR	3	3	2	AT2G39730.1;AT2G39730.2	M7(Oxidation)	2986.49	0.000162	0.00144408
	LMEYGNMLVMEQENVKRVQLAETYLSQAALGDANADAIGR	36	3	2	AT2G39730.1;AT2G39730.2		4412.17	0.000263	0.0141007
	FYWAPTREDR	40	3	2	AT2G39730.1;AT2G39730.2		1340.64	0.000281	0.00803327
	LMEYGNMLVMEQENVKRVQLAETYLSQAALGDANADAIGR	42	3	2	AT2G39730.1;AT2G39730.2	M7(Oxidation)	4428.16	0.000311	0.00948217
	LMEYGNMLVMEQENVKRVQLAETYLSQAALGDANADAIGR	16	3	2	AT2G39730.1;AT2G39730.2	N6(Deamidated)	4413.17	0.000317	0.00735434
	EAADLIKKGK	8	3	2	AT2G39730.1;AT2G39730.2		1072.63	0.000409	0.0160389
	EENARVPIICTGNDFSTLYAPLIRDGR	5	3	2	AT2G39730.1;AT2G39730.2	C10(Carbamidomethyl); N13(Deamidated)	3078.55	0.000425	0.00650958
	GIFRTDK	4	3	2	AT2G39730.1;AT2G39730.2		836.462	0.000446	0.00583335
	QRYREAADLIK	36	3	2	AT2G39730.1;AT2G39730.2		1362.75	0.00046	0.0129066
	LMEYGNMLVMEQENVKRVQLAETYLSQAALGDANADAIGR	10	3	2	AT2G39730.1;AT2G39730.2	Q12(Deamidated); Q19(Deamidated)	4414.16	0.000461	0.011857
	DEDIVTLVDQFPGQSIDFFGALRAR	2	3	2	AT2G39730.1;AT2G39730.2	Q14(Deamidated)	2810.4	0.000504	0.00840988
	YREAADLIK	40	3	2	AT2G39730.1;AT2G39730.2		1078.59	0.000748	0.00803021
	VPIICTGNDFSTLYAPLIRDGR	1	3	2	AT2G39730.1;AT2G39730.2	C5(Carbamidomethyl); N8(Deamidated)	2479.28	0.000816	0.0152342
	EGPPVFEQPEMTYEKLMEYGNMLVMEQENVKR	4	3	2	AT2G39730.1;AT2G39730.2	Q8(Deamidated); N21(Deamidated); Q27(Deamidated)	3848.76	0.000827	0.0241914
	QYNLDNMMDGFYIAPAFMDKLVVHITKNFLTLPNIK	1	3	2	AT2G39730.1;AT2G39730.2	N28(Deamidated)	4216.13	0.001141	0.0110713
	MEKFYWAPTREDR	3	3	2	AT2G39730.1;AT2G39730.2	M1(Oxidation)	1744.81	0.001199	0.0198367
	LMEYGNMLVMEQENVKRVQLAETYLSQAALGDANADAIGR	9	3	2	AT2G39730.1;AT2G39730.2	M2(Oxidation); M7(Oxidation)	4444.15	0.001647	0.036489
	MGGTTQYTVNNQMVNATLMNIADNPTNVQLPGMYNK	26	3	2	AT2G39730.1;AT2G39730.2	Q6(Deamidated); N10(Deamidated); N35(Deamidated)	3946.82	0.003117	0.0768375
	GTFYGKGAQQVNLPVPEGCTDPVAENFDPTARSDDGTCVYNF	4	1	1	AT2G39730.1	N12(Deamidated); C19(Carbamidomethyl); C38(Carbamidomethyl)	4595.05	0.020536	0.377951
	MGGTTQYTVNNQMVNATLMNIADNPTNVQLPGMYNK	1	3	2	AT2G39730.1;AT2G39730.2	T8(Phospho)	4023.82	0.041705	0.808241	20.3544	0.579638	T(4): 5.1; T(5): 5.1; Y(7): 23.4; T(8): 58.0; T(17): 5.1; T(26): 2.7; Y(34): 0.7
AT2G39730.2	rubisco activase	84.3	2	3	69	8066
	Sequence	# PSMs	# Proteins	# Protein Groups	Protein Group Accessions	Modifications	MH+ [Da]	q-Value	PEP	pRS Score	pRS Probability	pRS Site Probabilities
	VQLAETYLSQAALGDANADAIGR	324	3	2	AT2G39730.1;AT2G39730.2		2347.19	0	9.13333e-13
	MGINPIMMSAGELESGNAGEPAK	215	3	2	AT2G39730.1;AT2G39730.2	M7(Oxidation)	2320.06	0	5.13197e-10
	LMEYGNMLVMEQENVK	168	3	2	AT2G39730.1;AT2G39730.2		1927.9	0	4.01511e-08
	LMEYGNMLVMEQENVK	77	3	2	AT2G39730.1;AT2G39730.2	M2(Oxidation); M10(Oxidation)	1959.89	0	1.77202e-05
	VQLAETYLSQAALGDANADAIGRGTFYGK	120	3	2	AT2G39730.1;AT2G39730.2		3000.5	0	4.4127e-11
	LMEYGNMLVMEQENVK	12	3	2	AT2G39730.1;AT2G39730.2	M2(Oxidation); M7(Oxidation); M10(Oxidation)	1975.88	0	4.01462e-10
	LMEYGNMLVMEQENVKR	180	3	2	AT2G39730.1;AT2G39730.2		2083.99	0	4.76808e-09
	MGINPIMMSAGELESGNAGEPAK	207	3	2	AT2G39730.1;AT2G39730.2	M7(Oxidation); M8(Oxidation)	2336.06	0	9.84527e-09
	MGINPIMMSAGELESGNAGEPAK	172	3	2	AT2G39730.1;AT2G39730.2		2304.06	0	2.00031e-07
	DEDIVTLVDQFPGQSIDFFGALR	136	3	2	AT2G39730.1;AT2G39730.2		2582.27	0	1.06686e-06
	MGINPIMMSAGELESGNAGEPAK	36	3	2	AT2G39730.1;AT2G39730.2	M1(Oxidation); M7(Oxidation); M8(Oxidation)	2352.05	0	3.11729e-09
	VPIICTGNDFSTLYAPLIR	224	3	2	AT2G39730.1;AT2G39730.2	C5(Carbamidomethyl)	2150.14	0	3.92855e-12
	RVQLAETYLSQAALGDANADAIGRGTFYGK	80	3	2	AT2G39730.1;AT2G39730.2		3156.6	0	1.16108e-12
	GLAYDTSDDQQDITR	188	3	2	AT2G39730.1;AT2G39730.2		1697.76	0	1.41604e-09
	LMEYGNMLVMEQENVK	77	3	2	AT2G39730.1;AT2G39730.2	M10(Oxidation)	1943.89	0	2.28641e-05
	MCCLFINDLDAGAGR	144	3	2	AT2G39730.1;AT2G39730.2	C2(Carbamidomethyl); C3(Carbamidomethyl)	1712.76	0	4.52904e-06
	MCCLFINDLDAGAGR	37	3	2	AT2G39730.1;AT2G39730.2	M1(Oxidation); C2(Carbamidomethyl); C3(Carbamidomethyl)	1728.75	0	2.74522e-08
	LMEYGNMLVMEQENVKR	118	3	2	AT2G39730.1;AT2G39730.2	M2(Oxidation)	2099.99	0	4.16502e-06
	KGKMCCLFINDLDAGAGR	68	3	2	AT2G39730.1;AT2G39730.2	C5(Carbamidomethyl); C6(Carbamidomethyl)	2025.97	0	6.62329e-10
	GKGMVDSVFQAPMGTGTHHAVLSSYEYVSQGLR	86	3	2	AT2G39730.1;AT2G39730.2	M4(Oxidation)	3525.68	0	8.20226e-07
	GKMCCLFINDLDAGAGR	56	3	2	AT2G39730.1;AT2G39730.2	C4(Carbamidomethyl); C5(Carbamidomethyl)	1897.87	0	1.90942e-08
	RVQLAETYLSQAALGDANADAIGR	164	3	2	AT2G39730.1;AT2G39730.2		2503.27	0	5.09576e-07
	QYNLDNMMDGFYIAPAFMDK	29	3	2	AT2G39730.1;AT2G39730.2	M7(Oxidation); M8(Oxidation)	2416.02	0	3.91966e-05
	GLAYDTSDDQQDITRGK	48	3	2	AT2G39730.1;AT2G39730.2		1882.87	0	7.54923e-08
	GKGMVDSVFQAPMGTGTHHAVLSSYEYVSQGLR	17	3	2	AT2G39730.1;AT2G39730.2	M4(Oxidation); M13(Oxidation)	3541.68	0	2.12592e-09
	GKMCCLFINDLDAGAGR	16	3	2	AT2G39730.1;AT2G39730.2	M3(Oxidation); C4(Carbamidomethyl); C5(Carbamidomethyl)	1913.86	0	4.33514e-08
	QYNLDNMMDGFYIAPAFMDK	33	3	2	AT2G39730.1;AT2G39730.2	M18(Oxidation)	2400.03	0	2.5848e-10
	IKDEDIVTLVDQFPGQSIDFFGALR	168	3	2	AT2G39730.1;AT2G39730.2		2823.45	0	8.26991e-08
	EENARVPIICTGNDFSTLYAPLIR	192	3	2	AT2G39730.1;AT2G39730.2	C10(Carbamidomethyl)	2749.4	0	3.29353e-09
	GMVDSVFQAPMGTGTHHAVLSSYEYVSQGLR	100	3	2	AT2G39730.1;AT2G39730.2		3324.57	0	1.27415e-08
	MGINPIMMSAGELESGNAGEPAKLIR	107	3	2	AT2G39730.1;AT2G39730.2	M7(Oxidation)	2702.33	0	4.57389e-07
	EGPPVFEQPEMTYEK	18	3	2	AT2G39730.1;AT2G39730.2	M11(Oxidation)	1796.81	0	8.28058e-07
	KFVESLGVEKIGK	24	3	2	AT2G39730.1;AT2G39730.2		1433.83	0	4.84607e-06
	GMVDSVFQAPMGTGTHHAVLSSYEYVSQGLR	60	3	2	AT2G39730.1;AT2G39730.2	M2(Oxidation)	3340.57	0	0.0012707
	WRGLAYDTSDDQQDITR	64	3	2	AT2G39730.1;AT2G39730.2		2039.93	0	9.58508e-08
	MGINPIMMSAGELESGNAGEPAKLIR	128	3	2	AT2G39730.1;AT2G39730.2		2686.34	0	3.55745e-05
	MGINPIMMSAGELESGNAGEPAKLIR	96	3	2	AT2G39730.1;AT2G39730.2	M7(Oxidation); M8(Oxidation)	2718.33	0	2.71827e-07
	MGGTTQYTVNNQMVNATLMNIADNPTNVQLPGMYNK	115	3	2	AT2G39730.1;AT2G39730.2	M1(Oxidation); M13(Oxidation); M19(Oxidation)	3991.82	0	4.3484e-05
	TDKIKDEDIVTLVDQFPGQSIDFFGALR	116	3	2	AT2G39730.1;AT2G39730.2		3167.62	0	4.56138e-10
	EGPPVFEQPEMTYEK	144	3	2	AT2G39730.1;AT2G39730.2		1780.81	0	9.70625e-08
	NFLTLPNIKVPLILGIWGGKGQGK	88	3	2	AT2G39730.1;AT2G39730.2		2563.51	0	5.8106e-10
	MGGTTQYTVNNQMVNATLMNIADNPTNVQLPGMYNK	428	3	2	AT2G39730.1;AT2G39730.2	M19(Oxidation); M33(Oxidation)	3975.83	0	0.000113887
	GKGMVDSVFQAPMGTGTHHAVLSSYEYVSQGLR	148	3	2	AT2G39730.1;AT2G39730.2		3509.69	0	2.23903e-08
	NFLTLPNIKVPLILGIWGGK	72	3	2	AT2G39730.1;AT2G39730.2		2193.31	0	4.60099e-08
	QYNLDNMMDGFYIAPAFMDK	72	3	2	AT2G39730.1;AT2G39730.2		2384.04	0	3.07455e-09
	VPLILGIWGGKGQGK	60	3	2	AT2G39730.1;AT2G39730.2		1522.91	0	0.000238323
	KFVESLGVEK	88	3	2	AT2G39730.1;AT2G39730.2		1135.64	0	0.00022814
	IKDEDIVTLVDQFPGQSIDFFGALRAR	64	3	2	AT2G39730.1;AT2G39730.2		3050.61	0	4.87741e-05
	LMEYGNMLVMEQENVKR	79	3	2	AT2G39730.1;AT2G39730.2	M7(Oxidation); M10(Oxidation)	2115.98	0	0.00053446
	MGGTTQYTVNNQMVNATLMNIADNPTNVQLPGMYNK	208	3	2	AT2G39730.1;AT2G39730.2	M33(Oxidation)	3959.83	0	1.50428e-05
	SFQCELVMAK	23	3	2	AT2G39730.1;AT2G39730.2	C4(Carbamidomethyl); M8(Oxidation)	1228.57	0	2.00246e-05
	MGGTTQYTVNNQMVNATLMNIADNPTNVQLPGMYNKEENAR	32	3	2	AT2G39730.1;AT2G39730.2		4543.1	0	1.73911e-05
	LVVHITKNFLTLPNIKVPLILGIWGGK	20	3	2	AT2G39730.1;AT2G39730.2		2983.82	0	1.95015e-07
	MGGTTQYTVNNQMVNATLMNIADNPTNVQLPGMYNK	12	3	2	AT2G39730.1;AT2G39730.2	M1(Oxidation); M13(Oxidation); M19(Oxidation); M33(Oxidation)	4007.81	0	2.93552e-09
	MGGTTQYTVNNQMVNATLMNIADNPTNVQLPGMYNK	152	3	2	AT2G39730.1;AT2G39730.2		3943.85	0	8.29165e-09
	QYNLDNMMDGFYIAPAFMDKLVVHITK	12	3	2	AT2G39730.1;AT2G39730.2		3174.53	0	5.203e-07
	SFQCELVMAK	48	3	2	AT2G39730.1;AT2G39730.2	C4(Carbamidomethyl)	1212.58	0	3.92623e-06
	VPIICTGNDFSTLYAPLIRDGR	28	3	2	AT2G39730.1;AT2G39730.2	C5(Carbamidomethyl)	2478.28	0	2.2252e-06
	VYDDEVRKFVESLGVEK	32	3	2	AT2G39730.1;AT2G39730.2		2012.03	0	6.03985e-06
	EGPPVFEQPEMTYEKLMEYGNMLVMEQENVK	48	3	2	AT2G39730.1;AT2G39730.2		3689.67	0	5.99368e-07
	WRGLAYDTSDDQQDITRGK	24	3	2	AT2G39730.1;AT2G39730.2		2225.05	0	7.95801e-10
	MGINPIMMSAGELESGNAGEPAKLIR	15	3	2	AT2G39730.1;AT2G39730.2	M1(Oxidation); M7(Oxidation); M8(Oxidation)	2734.32	0	1.18565e-09
	VPLILGIWGGK	24	3	2	AT2G39730.1;AT2G39730.2		1152.71	0	0.000669638
	MGINPIMMSAGELESGNAGEPAKLIRQR	32	3	2	AT2G39730.1;AT2G39730.2		2970.5	0	4.2009e-05
	DEDIVTLVDQFPGQSIDFFGALRAR	76	3	2	AT2G39730.1;AT2G39730.2		2809.41	0	5.75301e-07
	FVESLGVEK	48	3	2	AT2G39730.1;AT2G39730.2		1007.54	0	3.23172e-05
	ARVYDDEVR	28	3	2	AT2G39730.1;AT2G39730.2		1122.55	0	0.000325497
	IGVCKGIFR	24	3	2	AT2G39730.1;AT2G39730.2	C4(Carbamidomethyl)	1049.59	0	0.000144932
	LVVHITK	24	3	2	AT2G39730.1;AT2G39730.2		809.525	0	0.00279271
	GQGKSFQCELVMAK	4	3	2	AT2G39730.1;AT2G39730.2	C8(Carbamidomethyl)	1582.77	0	0.000724489
	IGVCKGIFRTDK	32	3	2	AT2G39730.1;AT2G39730.2	C4(Carbamidomethyl)	1393.76	0	0.00115029
	GMVDSVFQAPMGTGTHHAVLSSYEYVSQGLR	12	3	2	AT2G39730.1;AT2G39730.2	M2(Oxidation); M11(Oxidation)	3356.57	0	9.26493e-06
	MEKFYWAPTR	16	3	2	AT2G39730.1;AT2G39730.2		1328.64	0	0.000526075
	EENARVPIICTGNDFSTLYAPLIRDGR	40	3	2	AT2G39730.1;AT2G39730.2	C10(Carbamidomethyl)	3077.54	0	2.96625e-05
	VYDDEVR	24	3	2	AT2G39730.1;AT2G39730.2		895.415	0	0.000964653
	LMEYGNMLVMEQENVKR	6	3	2	AT2G39730.1;AT2G39730.2	M2(Oxidation); M7(Oxidation); M10(Oxidation)	2131.98	0	0.000105541
	YREAADLIKK	48	3	2	AT2G39730.1;AT2G39730.2		1206.69	0	9.42895e-05
	EGPPVFEQPEMTYEKLMEYGNMLVMEQENVKR	19	3	2	AT2G39730.1;AT2G39730.2	M17(Oxidation)	3861.79	0	6.04792e-05
	KGKMCCLFINDLDAGAGR	11	3	2	AT2G39730.1;AT2G39730.2	M4(Oxidation); C5(Carbamidomethyl); C6(Carbamidomethyl)	2041.96	0	6.81665e-05
	VQLAETYLSQAALGDANADAIGR	48	3	2	AT2G39730.1;AT2G39730.2	Q10(Deamidated)	2348.18	0	1.87374e-12
	MGINPIMMSAGELESGNAGEPAK	16	3	2	AT2G39730.1;AT2G39730.2	N17(Deamidated)	2305.05	0	2.49329e-08
	GLAYDTSDDQQDITR	28	3	2	AT2G39730.1;AT2G39730.2	Q11(Deamidated)	1698.75	0	1.23866e-07
	VQLAETYLSQAALGDANADAIGRGTFYGK	18	3	2	AT2G39730.1;AT2G39730.2	N17(Deamidated)	3001.51	0	3.64284e-06
	LMEYGNMLVMEQENVK	27	3	2	AT2G39730.1;AT2G39730.2	N6(Deamidated)	1928.88	0	0.0029902
	VPIICTGNDFSTLYAPLIR	18	3	2	AT2G39730.1;AT2G39730.2	C5(Carbamidomethyl); N8(Deamidated)	2151.11	0	7.68284e-09
	MGINPIMMSAGELESGNAGEPAKLIR	24	3	2	AT2G39730.1;AT2G39730.2	N17(Deamidated)	2687.31	0	8.85716e-06
	EGPPVFEQPEMTYEKLMEYGNMLVMEQENVKR	12	3	2	AT2G39730.1;AT2G39730.2	Q8(Deamidated); N21(Deamidated)	3847.78	0	7.00131e-08
	GMVDSVFQAPMGTGTHHAVLSSYEYVSQGLR	25	3	2	AT2G39730.1;AT2G39730.2	Q8(Deamidated)	3325.56	0	0.000875714
	MCCLFINDLDAGAGR	17	3	2	AT2G39730.1;AT2G39730.2	C2(Carbamidomethyl); C3(Carbamidomethyl); N7(Deamidated)	1713.74	0	5.02961e-08
	IKDEDIVTLVDQFPGQSIDFFGALR	36	3	2	AT2G39730.1;AT2G39730.2	Q16(Deamidated)	2824.44	0	2.51008e-07
	QYNLDNMMDGFYIAPAFMDK	3	3	2	AT2G39730.1;AT2G39730.2	N6(Deamidated)	2385.03	0	3.95848e-07
	EGPPVFEQPEMTYEKLMEYGNMLVMEQENVK	14	3	2	AT2G39730.1;AT2G39730.2	Q8(Deamidated)	3690.66	0	2.79104e-05
	EGPPVFEQPEMTYEKLMEYGNMLVMEQENVKR	13	3	2	AT2G39730.1;AT2G39730.2	N21(Deamidated)	3846.79	0	0.000367774
	LVVHITKNFLTLPNIKVPLILGIWGGK	2	3	2	AT2G39730.1;AT2G39730.2	N14(Deamidated)	2984.81	0	3.49679e-05
	QYNLDNMMDGFYIAPAFMDKLVVHITK	9	3	2	AT2G39730.1;AT2G39730.2	N6(Deamidated)	3175.53	0	1.35619e-06
	EGPPVFEQPEMTYEK	7	3	2	AT2G39730.1;AT2G39730.2	Q8(Deamidated)	1781.79	0	1.63226e-06
	EENARVPIICTGNDFSTLYAPLIR	29	3	2	AT2G39730.1;AT2G39730.2	C10(Carbamidomethyl); N13(Deamidated)	2750.39	0	1.70389e-06
	WRGLAYDTSDDQQDITR	10	3	2	AT2G39730.1;AT2G39730.2	Q12(Deamidated)	2040.92	0	1.1444e-05
	MGGTTQYTVNNQMVNATLMNIADNPTNVQLPGMYNK	309	3	2	AT2G39730.1;AT2G39730.2	N15(Deamidated)	3944.83	0	0.00552207
	MGGTTQYTVNNQMVNATLMNIADNPTNVQLPGMYNKEENAR	40	3	2	AT2G39730.1;AT2G39730.2	Q29(Deamidated)	4544.11	0	2.36291e-05
	SFQCELVMAK	5	3	2	AT2G39730.1;AT2G39730.2	Q3(Deamidated); C4(Carbamidomethyl)	1213.56	0	3.66344e-05
	GKGMVDSVFQAPMGTGTHHAVLSSYEYVSQGLR	18	3	2	AT2G39730.1;AT2G39730.2	Q10(Deamidated)	3510.66	0	0.00130504
	LMEYGNMLVMEQENVKR	11	3	2	AT2G39730.1;AT2G39730.2	Q12(Deamidated)	2084.98	0	0.000999896
	VQLAETYLSQAALGDANADAIGRGTFYGKTEEK	8	1	1	AT2G39730.2	Q10(Deamidated)	3488.72	0	0.00046354
	MGGTTQYTVNNQMVNATLMNIADNPTNVQLPGMYNK	77	3	2	AT2G39730.1;AT2G39730.2	N15(Deamidated); N20(Deamidated)	3945.83	0	6.00883e-06
	ARVYDDEVRK	4	3	2	AT2G39730.1;AT2G39730.2		1250.65	0	0.00040119
	GTFYGKTEEKEPSK	16	1	1	AT2G39730.2		1600.78	0	0.000313736
	EGPPVFEQPEMTYEKLMEYGNMLVMEQENVKR	28	3	2	AT2G39730.1;AT2G39730.2		3845.78	0	7.43044e-08
	DEDIVTLVDQFPGQSIDFFGALR	14	3	2	AT2G39730.1;AT2G39730.2	Q10(Deamidated)	2583.25	0	2.21033e-07
	MGINPIMMSAGELESGNAGEPAK	1	3	2	AT2G39730.1;AT2G39730.2	N4(Deamidated); N17(Deamidated)	2306.05	0	1.66015e-05
	TDKIKDEDIVTLVDQFPGQSIDFFGALR	22	3	2	AT2G39730.1;AT2G39730.2	Q19(Deamidated)	3168.61	0	4.41204e-05
	GMVDSVFQAPMGTGTHHAVLSSYEYVSQGLR	2	3	2	AT2G39730.1;AT2G39730.2	Q8(Deamidated); Q28(Deamidated)	3326.56	0	0.000219849
	RVQLAETYLSQAALGDANADAIGR	16	3	2	AT2G39730.1;AT2G39730.2	Q11(Deamidated)	2504.29	0	0.00352477
	IKDEDIVTLVDQFPGQSIDFFGALRAR	2	3	2	AT2G39730.1;AT2G39730.2	Q12(Deamidated)	3051.59	0	0.000358137
	RVQLAETYLSQAALGDANADAIGRGTFYGK	7	3	2	AT2G39730.1;AT2G39730.2	N18(Deamidated)	3157.61	0	0.00356879
	VQLAETYLSQAALGDANADAIGRGTFYGKTEEK	20	1	1	AT2G39730.2		3487.73	0	8.29535e-06
	LVVHITKNFLTLPNIK	12	3	2	AT2G39730.1;AT2G39730.2		1850.12	0	0.000223318
	QTDGDRWRGLAYDTSDDQQDITR	12	3	2	AT2G39730.1;AT2G39730.2		2712.22	0	0.00184653
	EGPPVFEQPEMTYEKLMEYGNMLVMEQENVK	6	3	2	AT2G39730.1;AT2G39730.2	Q8(Deamidated); N21(Deamidated)	3691.65	0	4.24826e-05
	MGGTTQYTVNNQMVNATLMNIADNPTNVQLPGMYNKEENAR	40	3	2	AT2G39730.1;AT2G39730.2	N27(Deamidated); Q29(Deamidated)	4545.1	0	2.50719e-06
	DEDIVTLVDQFPGQSIDFFGALR	2	3	2	AT2G39730.1;AT2G39730.2	Q10(Deamidated); Q14(Deamidated)	2584.25	0	0.00425783
	IKDEDIVTLVDQFPGQSIDFFGALR	1	3	2	AT2G39730.1;AT2G39730.2	Q12(Deamidated); Q16(Deamidated)	2825.43	0	2.99299e-06
	NFLTLPNIKVPLILGIWGGKGQGK	3	3	2	AT2G39730.1;AT2G39730.2	N7(Deamidated)	2564.51	0	1.33581e-05
	VQLAETYLSQAALGDANADAIGRGTFYGK	6	3	2	AT2G39730.1;AT2G39730.2	Q2(Deamidated); N17(Deamidated)	3002.49	0	0.00217138
	MEKFYWAPTREDR	36	3	2	AT2G39730.1;AT2G39730.2		1728.81	7.6e-05	0.00111033
	VYDDEVRK	4	3	2	AT2G39730.1;AT2G39730.2		1023.51	7.6e-05	0.00116508
	QYNLDNMMDGFYIAPAFMDKLVVHITKNFLTLPNIK	4	3	2	AT2G39730.1;AT2G39730.2		4215.14	7.6e-05	0.000139986
	FYWAPTR	48	3	2	AT2G39730.1;AT2G39730.2		940.468	9.3e-05	0.00357622
	NFLTLPNIK	48	3	2	AT2G39730.1;AT2G39730.2		1059.62	0.000142	0.00463542
	EGPPVFEQPEMTYEKLMEYGNMLVMEQENVK	8	3	2	AT2G39730.1;AT2G39730.2	M25(Oxidation)	3705.69	0.000155	0.00112908
	MGINPIMMSAGELESGNAGEPAKLIRQR	3	3	2	AT2G39730.1;AT2G39730.2	M7(Oxidation)	2986.49	0.000162	0.00144408
	LMEYGNMLVMEQENVKRVQLAETYLSQAALGDANADAIGR	36	3	2	AT2G39730.1;AT2G39730.2		4412.17	0.000263	0.0141007
	FYWAPTREDR	40	3	2	AT2G39730.1;AT2G39730.2		1340.64	0.000281	0.00803327
	LMEYGNMLVMEQENVKRVQLAETYLSQAALGDANADAIGR	42	3	2	AT2G39730.1;AT2G39730.2	M7(Oxidation)	4428.16	0.000311	0.00948217
	LMEYGNMLVMEQENVKRVQLAETYLSQAALGDANADAIGR	16	3	2	AT2G39730.1;AT2G39730.2	N6(Deamidated)	4413.17	0.000317	0.00735434
	EAADLIKKGK	8	3	2	AT2G39730.1;AT2G39730.2		1072.63	0.000409	0.0160389
	EENARVPIICTGNDFSTLYAPLIRDGR	5	3	2	AT2G39730.1;AT2G39730.2	C10(Carbamidomethyl); N13(Deamidated)	3078.55	0.000425	0.00650958
	GIFRTDK	4	3	2	AT2G39730.1;AT2G39730.2		836.462	0.000446	0.00583335
	QRYREAADLIK	36	3	2	AT2G39730.1;AT2G39730.2		1362.75	0.00046	0.0129066
	LMEYGNMLVMEQENVKRVQLAETYLSQAALGDANADAIGR	10	3	2	AT2G39730.1;AT2G39730.2	Q12(Deamidated); Q19(Deamidated)	4414.16	0.000461	0.011857
	DEDIVTLVDQFPGQSIDFFGALRAR	2	3	2	AT2G39730.1;AT2G39730.2	Q14(Deamidated)	2810.4	0.000504	0.00840988
	GTFYGKTEEK	8	1	1	AT2G39730.2		1159.56	0.000644	0.0106568
	YREAADLIK	40	3	2	AT2G39730.1;AT2G39730.2		1078.59	0.000748	0.00803021
	VPIICTGNDFSTLYAPLIRDGR	1	3	2	AT2G39730.1;AT2G39730.2	C5(Carbamidomethyl); N8(Deamidated)	2479.28	0.000816	0.0152342
	EGPPVFEQPEMTYEKLMEYGNMLVMEQENVKR	4	3	2	AT2G39730.1;AT2G39730.2	Q8(Deamidated); N21(Deamidated); Q27(Deamidated)	3848.76	0.000827	0.0241914
	QYNLDNMMDGFYIAPAFMDKLVVHITKNFLTLPNIK	1	3	2	AT2G39730.1;AT2G39730.2	N28(Deamidated)	4216.13	0.001141	0.0110713
	MEKFYWAPTREDR	3	3	2	AT2G39730.1;AT2G39730.2	M1(Oxidation)	1744.81	0.001199	0.0198367
	LMEYGNMLVMEQENVKRVQLAETYLSQAALGDANADAIGR	9	3	2	AT2G39730.1;AT2G39730.2	M2(Oxidation); M7(Oxidation)	4444.15	0.001647	0.036489
	MGGTTQYTVNNQMVNATLMNIADNPTNVQLPGMYNK	26	3	2	AT2G39730.1;AT2G39730.2	Q6(Deamidated); N10(Deamidated); N35(Deamidated)	3946.82	0.003117	0.0768375
	MGGTTQYTVNNQMVNATLMNIADNPTNVQLPGMYNK	1	3	2	AT2G39730.1;AT2G39730.2	T8(Phospho)	4023.82	0.041705	0.808241	20.3544	0.579638	T(4): 5.1; T(5): 5.1; Y(7): 23.4; T(8): 58.0; T(17): 5.1; T(26): 2.7; Y(34): 0.7
AT4G33470.1	histone deacetylase 14	6.62	1	1	1	2
	Sequence	# PSMs	# Proteins	# Protein Groups	Protein Group Accessions	Modifications	MH+ [Da]	q-Value	PEP	pRS Score	pRS Probability	pRS Site Probabilities
	ISDIGKGKGEGTTLNLPLPGGSGDIAMR	2	1	1	AT4G33470.1	T12(Phospho); S22(Phospho)	2914.38	0.042196	0.654615	2.35479	0.210775	S(2): 36.8; T(12): 54.4; T(13): 54.4; S(22): 54.4
AT3G22760.1	Tesmin/TSO1-like CXC domain-containing protein	2.79	1	1	1	1
	Sequence	# PSMs	# Proteins	# Protein Groups	Protein Group Accessions	Modifications	MH+ [Da]	q-Value	PEP	pRS Score	pRS Probability	pRS Site Probabilities
	VIRNSDSIIEVGEDASK	1	1	1	AT3G22760.1	S16(Phospho)	1911.89	0.042639	0.821645	51.6401	0.999446	S(5): 0.0; S(7): 0.1; S(16): 99.9
AT3G16950.1	lipoamide dehydrogenase 1	51.75	2	8	19	455
	Sequence	# PSMs	# Proteins	# Protein Groups	Protein Group Accessions	Modifications	MH+ [Da]	q-Value	PEP	pRS Score	pRS Probability	pRS Site Probabilities
	TAIIEGDVVGGTCVNR	28	3	2	AT3G16950.1;AT4G16155.1	C13(Carbamidomethyl)	1660.83	0	1.88588e-08
	APFTNGLGLENVNVVTQR	28	2	1	AT3G16950.1		1929.02	0	6.4086e-10
	AIGVDILTGFGSVLGPQK	16	2	1	AT3G16950.1		1771.99	0	1.14088e-08
	MIYRPDNGEILGVHIFGLHAADLIHEASNAIALGTR	7	3	2	AT3G16950.1;AT4G16155.1	M1(Oxidation)	3901.02	0	4.00428e-10
	SFDYDLIIIGAGVGGHGAALHAVEK	56	3	2	AT3G16950.1;AT4G16155.1		2510.3	0	1.04978e-08
	DIIIATGSVPFVPK	24	3	2	AT3G16950.1;AT4G16155.1		1456.84	0	0.000118489
	KIDYHTGVFASK	32	3	2	AT3G16950.1;AT4G16155.1		1365.71	0	8.79294e-06
	DTLEVDAALIATGR	28	3	2	AT3G16950.1;AT4G16155.1		1444.76	0	4.08376e-07
	MIYRPDNGEILGVHIFGLHAADLIHEASNAIALGTR	44	3	2	AT3G16950.1;AT4G16155.1		3885.02	0	1.75144e-09
	DGKPVLIELIDAK	28	3	2	AT3G16950.1;AT4G16155.1		1410.82	0	0.000126997
	DHVLNHLSIPAACFTHPEISMVGLTEPQAK	24	2	1	AT3G16950.1	C13(Carbamidomethyl)	3312.66	0	8.35497e-06
	AIGVDILTGFGSVLGPQKVK	28	2	1	AT3G16950.1		1999.16	0	0.000268042
	TAIIEGDVVGGTCVNRGCVPSK	24	3	2	AT3G16950.1;AT4G16155.1	C13(Carbamidomethyl); C18(Carbamidomethyl)	2289.13	0	0.000324445
	LMLAHAASAQGISVVEQVSGR	20	2	1	AT3G16950.1		2124.12	0	0.000971804
	MIYRPDNGEILGVHIFGLHAADLIHEASNAIALGTR	8	3	2	AT3G16950.1;AT4G16155.1	N7(Deamidated)	3886.03	0	0.000284173
	EGFKVSVVK	12	2	1	AT3G16950.1		992.577	0	0.0019961
	MIYRPDNGEILGVHIFGLHAADLIHEASNAIALGTR	1	3	2	AT3G16950.1;AT4G16155.1	N7(Deamidated); N29(Deamidated)	3887.01	0	5.87504e-05
	SFGLQVSAAGYDR	4	2	1	AT3G16950.1		1370.67	0	0.000481634
	LAVHAHPTLSEVLDELFK	4	2	1	AT3G16950.1		2019.09	0	0.000345748
	IDYHTGVFASK	16	3	2	AT3G16950.1;AT4G16155.1		1237.62	7.5e-05	0.000245516
	DHVLNHLSIPAACFTHPEISMVGLTEPQAK	4	2	1	AT3G16950.1	N5(Deamidated); C13(Carbamidomethyl)	3313.65	9e-05	0.00142545
	MRELQNEHHMK	16	3	2	AT3G16950.1;AT4G16155.1		1452.68	0.000309	0.000979513
	DIIIATGSVPFVPK	2	3	2	AT3G16950.1;AT4G16155.1	S8(Phospho)	1536.8	0.043742	0.515851	37.6491	0.876955	T(6): 12.3; S(8): 87.7
	KSFQVSASASSNGNGAPPK	1	2	1	AT3G16950.1	S2(Phospho); S6(Phospho); S11(Phospho)	2073.8	0.549979	1	35.9509	0.431655	S(2): 75.4; S(6): 75.4; S(8): 33.8; S(10): 33.8; S(11): 81.5
AT4G16155.1	dihydrolipoyl dehydrogenases	53.81	1	10	23	649
	Sequence	# PSMs	# Proteins	# Protein Groups	Protein Group Accessions	Modifications	MH+ [Da]	q-Value	PEP	pRS Score	pRS Probability	pRS Site Probabilities
	ALGVDILTGFGAVLGPQK	44	1	1	AT4G16155.1		1756	0	1.43745e-11
	APFTNGLGLENINVTTQR	48	1	1	AT4G16155.1		1945.01	0	1.72706e-13
	TAIIEGDVVGGTCVNR	28	3	2	AT3G16950.1;AT4G16155.1	C13(Carbamidomethyl)	1660.83	0	1.88588e-08
	MIYRPDNGEILGVHIFGLHAADLIHEASNAIALGTR	7	3	2	AT3G16950.1;AT4G16155.1	M1(Oxidation)	3901.02	0	4.00428e-10
	SFDYDLIIIGAGVGGHGAALHAVEK	56	3	2	AT3G16950.1;AT4G16155.1		2510.3	0	1.04978e-08
	LAVHAHPTLSEVVDELFK	60	1	1	AT4G16155.1		2005.08	0	3.27816e-07
	DIIIATGSVPFVPK	24	3	2	AT3G16950.1;AT4G16155.1		1456.84	0	0.000118489
	KIDYHTGVFASK	32	3	2	AT3G16950.1;AT4G16155.1		1365.71	0	8.79294e-06
	DTLEVDAALIATGR	28	3	2	AT3G16950.1;AT4G16155.1		1444.76	0	4.08376e-07
	MIYRPDNGEILGVHIFGLHAADLIHEASNAIALGTR	44	3	2	AT3G16950.1;AT4G16155.1		3885.02	0	1.75144e-09
	AFGLQVSAAGYDR	20	1	1	AT4G16155.1		1354.67	0	3.13103e-06
	DGKPVLIELIDAK	28	3	2	AT3G16950.1;AT4G16155.1		1410.82	0	0.000126997
	DHVLNHLSIPAACFTHPEISMVGLTEPQAR	72	1	1	AT4G16155.1	C13(Carbamidomethyl)	3340.66	0	1.29232e-05
	ALGVDILTGFGAVLGPQKVK	28	1	1	AT4G16155.1		1983.16	0	7.33445e-08
	LMLAHAASAQGISVVEQVTGR	20	1	1	AT4G16155.1		2138.15	0	9.73824e-05
	DHVLNHLSIPAACFTHPEISMVGLTEPQAR	6	1	1	AT4G16155.1	C13(Carbamidomethyl); M21(Oxidation)	3356.65	0	8.25078e-06
	TAIIEGDVVGGTCVNRGCVPSK	24	3	2	AT3G16950.1;AT4G16155.1	C13(Carbamidomethyl); C18(Carbamidomethyl)	2289.13	0	0.000324445
	LVPHLYCIGDANGK	20	1	1	AT4G16155.1	C7(Carbamidomethyl)	1556.79	0	0.000677275
	MIYRPDNGEILGVHIFGLHAADLIHEASNAIALGTR	8	3	2	AT3G16950.1;AT4G16155.1	N7(Deamidated)	3886.03	0	0.000284173
	DHVLNHLSIPAACFTHPEISMVGLTEPQAR	4	1	1	AT4G16155.1	N5(Deamidated); C13(Carbamidomethyl)	3341.66	0	2.12601e-05
	MIYRPDNGEILGVHIFGLHAADLIHEASNAIALGTR	1	3	2	AT3G16950.1;AT4G16155.1	N7(Deamidated); N29(Deamidated)	3887.01	0	5.87504e-05
	MRVIDGNGKLVPHLYCIGDANGK	4	1	1	AT4G16155.1	C16(Carbamidomethyl)	2527.3	0	0.000680348
	IDYHTGVFASK	16	3	2	AT3G16950.1;AT4G16155.1		1237.62	7.5e-05	0.000245516
	ITPAKDGKPVLIELIDAK	4	1	1	AT4G16155.1		1921.14	7.8e-05	0.00263442
	MRELQNEHHMK	16	3	2	AT3G16950.1;AT4G16155.1		1452.68	0.000309	0.000979513
	DIIIATGSVPFVPK	2	3	2	AT3G16950.1;AT4G16155.1	S8(Phospho)	1536.8	0.043742	0.515851	37.6491	0.876955	T(6): 12.3; S(8): 87.7
	IEVSAAASSSAGNGAPSKSFDYDLIIIGAGVGGHGAALHAVEK	2	1	1	AT4G16155.1	S17(Phospho)	4175.02	0.156631	1	1.29585	0.148324	S(4): 11.0; S(8): 14.8; S(9): 14.8; S(10): 14.8; S(17): 14.8; S(19): 14.8; Y(22): 14.8
	VKYGDNIITGKDIIIATGSVPFVPK	2	1	1	AT4G16155.1	T9(Phospho); S19(Phospho)	2805.44	0.313538	0.954436	1.06076e-14	0.166667	Y(3): 50.0; T(9): 50.0; T(17): 50.0; S(19): 50.0
	GSELDIIAGNFEISGLK	1	1	1	AT4G16155.1	N10(Deamidated)	1763.92	0.593395	1
AT3G06650.1	ATP-citrate lyase B-1	53.95	1	4	21	426
	Sequence	# PSMs	# Proteins	# Protein Groups	Protein Group Accessions	Modifications	MH+ [Da]	q-Value	PEP	pRS Score	pRS Probability	pRS Site Probabilities
	IGDTAGTIDNIIQCK	32	2	2	AT3G06650.1;AT5G49460.1	C14(Carbamidomethyl)	1618.81	0	1.15396e-07
	SAAASSMAALKQPTIK	8	2	2	AT3G06650.1;AT5G49460.1		1574.86	0	7.71683e-07
	SGGMSNEMYNTIAR	16	1	1	AT3G06650.1		1530.66	0	2.29984e-06
	DLVSSLVSGLLTIGPR	76	2	2	AT3G06650.1;AT5G49460.1		1626.95	0	5.28902e-06
	ETPSVAGIINPGSEGFQK	28	2	2	AT3G06650.1;AT5G49460.1		1830.92	0	1.49457e-08
	VTDGIYEGIAIGGDVFPGSTLSDHILR	44	2	2	AT3G06650.1;AT5G49460.1		2802.43	0	1.88773e-08
	VVAIIAEGVPESDTK	24	2	2	AT3G06650.1;AT5G49460.1		1527.82	0	3.07218e-07
	MLDFDFLCGR	12	2	2	AT3G06650.1;AT5G49460.1	C8(Carbamidomethyl)	1273.57	0	0.000587304
	AGKDLVSSLVSGLLTIGPR	24	2	2	AT3G06650.1;AT5G49460.1		1883.09	0	0.00204491
	ANNKVIIGPATVGGVQAGAFK	28	1	1	AT3G06650.1		2012.13	0	1.9724e-07
	LYRPGSVGFVSK	36	2	2	AT3G06650.1;AT5G49460.1		1309.73	0	1.53506e-07
	LFFGQEEIAIPVHAAIEAACAAHPTADVFINFASFR	4	2	2	AT3G06650.1;AT5G49460.1	C20(Carbamidomethyl)	3930.98	0	0.000588942
	LFKSEVQFGHAGAK	16	2	2	AT3G06650.1;AT5G49460.1		1518.81	0	0.000186766
	NTQALFYNYK	16	1	1	AT3G06650.1		1261.62	0	0.000504056
	LFFGQEEIAIPVHAAIEAACAAHPTADVFINFASFR	2	2	2	AT3G06650.1;AT5G49460.1	C20(Carbamidomethyl); N31(Deamidated)	3931.97	0	6.28772e-05
	LFFGQEEIAIPVHAAIEAACAAHPTADVFINFASFR	1	2	2	AT3G06650.1;AT5G49460.1	Q5(Deamidated); C20(Carbamidomethyl); N31(Deamidated)	3932.96	0	6.26326e-05
	EVTPPQIPEDLSSAIK	28	1	1	AT3G06650.1		1723.91	7.6e-05	0.000781903
	EVTPPQIPEDLSSAIK	1	1	1	AT3G06650.1	Q6(Deamidated)	1724.91	8.6e-05	0.00227274
	VRAPTHIISTISDDR	8	2	2	AT3G06650.1;AT5G49460.1		1680.9	0.000147	0.00364209
	SIGLIGHTFDQKR	4	2	2	AT3G06650.1;AT5G49460.1		1471.8	0.000409	0.0137231
	ATGQLFSR	1	2	2	AT3G06650.1;AT5G49460.1	N-Term(Acetyl)	921.482	0.006911	0.190526
	ANNLVLNVDGAIGSLFLDLLAGSGMFTK	1	2	2	AT3G06650.1;AT5G49460.1	S23(Phospho)	2930.46	0.044228	0.66215	2.13865	0.412885	S(14): 27.2; S(23): 41.3; T(27): 31.6
	ETFDKLVEEGK	4	1	1	AT3G06650.1		1294.65	0.058876	0.805633
	SAAASSMAALKQPTIK	7	2	2	AT3G06650.1;AT5G49460.1	T14(Phospho)	1654.83	0.112802	0.962452	64.2472	0.999998	S(1): 0.0; S(5): 0.0; S(6): 0.0; T(14): 100.0
	DLVSSLVSGLLTIGPRFGGAIDDAAR	3	2	2	AT3G06650.1;AT5G49460.1	S5(Phospho); S8(Phospho)	2760.32	0.156783	0.794709	7.74067	0.157305	S(4): 31.4; S(5): 47.2; S(8): 60.7; T(12): 60.7
	IGDTAGTIDNIIQCK	2	2	2	AT3G06650.1;AT5G49460.1	Q13(Deamidated); C14(Carbamidomethyl)	1619.79
AT5G49460.1	ATP citrate lyase subunit B 2	52.47	1	4	20	393
	Sequence	# PSMs	# Proteins	# Protein Groups	Protein Group Accessions	Modifications	MH+ [Da]	q-Value	PEP	pRS Score	pRS Probability	pRS Site Probabilities
	IGDTAGTIDNIIQCK	32	2	2	AT3G06650.1;AT5G49460.1	C14(Carbamidomethyl)	1618.81	0	1.15396e-07
	SAAASSMAALKQPTIK	8	2	2	AT3G06650.1;AT5G49460.1		1574.86	0	7.71683e-07
	DLVSSLVSGLLTIGPR	76	2	2	AT3G06650.1;AT5G49460.1		1626.95	0	5.28902e-06
	ETPSVAGIINPGSEGFQK	28	2	2	AT3G06650.1;AT5G49460.1		1830.92	0	1.49457e-08
	SGGMSNEMYNTVAR	20	1	1	AT5G49460.1		1516.65	0	0.000109005
	VTDGIYEGIAIGGDVFPGSTLSDHILR	44	2	2	AT3G06650.1;AT5G49460.1		2802.43	0	1.88773e-08
	VVAIIAEGVPESDTK	24	2	2	AT3G06650.1;AT5G49460.1		1527.82	0	3.07218e-07
	MLDFDFLCGR	12	2	2	AT3G06650.1;AT5G49460.1	C8(Carbamidomethyl)	1273.57	0	0.000587304
	AGKDLVSSLVSGLLTIGPR	24	2	2	AT3G06650.1;AT5G49460.1		1883.09	0	0.00204491
	ANNKVVIGPATVGGIQAGAFK	28	1	1	AT5G49460.1		2012.13	0	3.6592e-16
	LYRPGSVGFVSK	36	2	2	AT3G06650.1;AT5G49460.1		1309.73	0	1.53506e-07
	LFFGQEEIAIPVHAAIEAACAAHPTADVFINFASFR	4	2	2	AT3G06650.1;AT5G49460.1	C20(Carbamidomethyl)	3930.98	0	0.000588942
	LFKSEVQFGHAGAK	16	2	2	AT3G06650.1;AT5G49460.1		1518.81	0	0.000186766
	LFFGQEEIAIPVHAAIEAACAAHPTADVFINFASFR	2	2	2	AT3G06650.1;AT5G49460.1	C20(Carbamidomethyl); N31(Deamidated)	3931.97	0	6.28772e-05
	LFFGQEEIAIPVHAAIEAACAAHPTADVFINFASFR	1	2	2	AT3G06650.1;AT5G49460.1	Q5(Deamidated); C20(Carbamidomethyl); N31(Deamidated)	3932.96	0	6.26326e-05
	NQALIDAGAIVPTSFEALESAIK	8	1	1	AT5G49460.1		2358.25	7.5e-05	0.000782888
	NQALIDAGAIVPTSFEALESAIKETFEK	4	1	1	AT5G49460.1		2992.53	9.2e-05	0.0017597
	VRAPTHIISTISDDR	8	2	2	AT3G06650.1;AT5G49460.1		1680.9	0.000147	0.00364209
	SIGLIGHTFDQKR	4	2	2	AT3G06650.1;AT5G49460.1		1471.8	0.000409	0.0137231
	ATGQLFSR	1	2	2	AT3G06650.1;AT5G49460.1	N-Term(Acetyl)	921.482	0.006911	0.190526
	ANNLVLNVDGAIGSLFLDLLAGSGMFTK	1	2	2	AT3G06650.1;AT5G49460.1	S23(Phospho)	2930.46	0.044228	0.66215	2.13865	0.412885	S(14): 27.2; S(23): 41.3; T(27): 31.6
	SAAASSMAALKQPTIK	7	2	2	AT3G06650.1;AT5G49460.1	T14(Phospho)	1654.83	0.112802	0.962452	64.2472	0.999998	S(1): 0.0; S(5): 0.0; S(6): 0.0; T(14): 100.0
	DLVSSLVSGLLTIGPRFGGAIDDAAR	3	2	2	AT3G06650.1;AT5G49460.1	S5(Phospho); S8(Phospho)	2760.32	0.156783	0.794709	7.74067	0.157305	S(4): 31.4; S(5): 47.2; S(8): 60.7; T(12): 60.7
	IGDTAGTIDNIIQCK	2	2	2	AT3G06650.1;AT5G49460.1	Q13(Deamidated); C14(Carbamidomethyl)	1619.79
AT3G15090.1	GroES-like zinc-binding alcohol dehydrogenase family protein	16.39	1	5	5	105
	Sequence	# PSMs	# Proteins	# Protein Groups	Protein Group Accessions	Modifications	MH+ [Da]	q-Value	PEP	pRS Score	pRS Probability	pRS Site Probabilities
	DVSGEVAAIGTSVK	8	1	1	AT3G15090.1		1332.7	0	1.15444e-05
	FGGPEVFELR	24	1	1	AT3G15090.1		1150.59	0	4.24396e-05
	IGINFLR	12	1	1	AT3G15090.1		832.504	0	0.000393816
	ENVPVPNLNPNEVLVK	32	1	1	AT3G15090.1		1774.97	0	0.000504169
	SVFQPHLPIIVGR	20	1	1	AT3G15090.1		1462.85	0	2.12001e-05
	DVSGEVAAIGTSVK	6	1	1	AT3G15090.1	T11(Phospho)	1412.67	0.048002	0.693692	29.0064	0.874813	S(3): 0.2; T(11): 87.5; S(12): 12.3
	IGINFLR	3	1	1	AT3G15090.1	N4(Deamidated)	833.487

## Sheet: Crude extract+MOAC
Accession	Description	ΣCoverage	Σ# Proteins	Σ# Unique Peptides	Σ# Peptides	Σ# PSMs	MH+ [Da]	q-Value	PEP	pRS Score	pRS Probability	pRS Site Probabilities
AT5G14740.2	carbonic anhydrase 2	88.42	5	25	37	1688
	Sequence	# PSMs	# Proteins	# Protein Groups	Protein Group Accessions	Modifications	MH+ [Da]	q-Value	PEP	pRS Score	pRS Probability	pRS Site Probabilities
	VLAESESSAFEDQCGR	48	5	1	AT5G14740.2	C14(Carbamidomethyl)	1784.77	0	3.59894e-10
	ITAELQAASSSDSK	68	5	1	AT5G14740.2		1407.69	0	1.46616e-10
	GLMSFPLDGNNSTDFIEDWVK	72	8	3	AT5G14740.2;AT3G01500.3;AT3G01500.1		2385.1	0	5.47836e-10
	KITAELQAASSSDSK	64	5	1	AT5G14740.2		1535.79	0	1.18217e-08
	EAVNVSLANLLTYPFVR	112	5	3	AT5G14740.2;AT3G01500.3;AT3G01500.1		1906.04	0	4.79375e-09
	SKVLAESESSAFEDQCGR	40	5	1	AT5G14740.2	C16(Carbamidomethyl)	1999.9	0	5.95876e-10
	VCPSHVLDFHPGDAFVVR	84	5	1	AT5G14740.2	C2(Carbamidomethyl)	2052.01	0	1.08838e-08
	YETNPALYGELAKGQSPK	56	8	3	AT5G14740.2;AT3G01500.3;AT3G01500.1		1965.99	0	1.39054e-07
	VKKITAELQAASSSDSK	72	5	1	AT5G14740.2		1762.95	0	8.82662e-08
	EKYETNPALYGELAK	96	8	3	AT5G14740.2;AT3G01500.3;AT3G01500.1		1725.87	0	7.07258e-07
	GLMSFPLDGNNSTDFIEDWVK	14	8	3	AT5G14740.2;AT3G01500.3;AT3G01500.1	M3(Oxidation)	2401.1	0	1.35436e-07
	VKYAGVGAAIEYAVLHLK	44	5	1	AT5G14740.2		1902.08	0	8.44089e-11
	GNESYEDAIEALK	24	1	1	AT5G14740.2		1438.67	0	3.53368e-06
	YETNPALYGELAK	56	8	3	AT5G14740.2;AT3G01500.3;AT3G01500.1		1468.73	0	5.03053e-06
	EKYETNPALYGELAKGQSPK	68	8	3	AT5G14740.2;AT3G01500.3;AT3G01500.1		2223.13	0	1.27721e-08
	GNESYEDAIEALKK	56	1	1	AT5G14740.2		1566.76	0	4.71543e-07
	VENIVVIGHSACGGIK	56	8	3	AT5G14740.2;AT3G01500.3;AT3G01500.1	C12(Carbamidomethyl)	1652.88	0	5.9567e-07
	NIANMVPPFDKVK	17	8	3	AT5G14740.2;AT3G01500.3;AT3G01500.1	M5(Oxidation)	1488.79	0	8.81584e-06
	KITAELQAASSSDSKSFDPVER	48	5	1	AT5G14740.2		2366.18	0	3.62627e-09
	IKEGFVTFKK	16	5	1	AT5G14740.2		1196.7	0	0.00229957
	LLIEKDDLKDVAAAK	40	5	1	AT5G14740.2		1641.94	0	6.84559e-06
	DDLKDVAAAK	24	5	1	AT5G14740.2		1045.55	0	0.000289785
	NIANMVPPFDK	18	8	3	AT5G14740.2;AT3G01500.3;AT3G01500.1	M5(Oxidation)	1261.62	0	0.000168151
	YAGVGAAIEYAVLHLK	56	5	1	AT5G14740.2		1674.92	0	9.7659e-09
	LLIEKDDLK	24	5	1	AT5G14740.2		1086.64	0	0.000910908
	NIANMVPPFDK	28	8	3	AT5G14740.2;AT3G01500.3;AT3G01500.1		1245.63	0	0.00036558
	NIANMVPPFDKVK	68	8	3	AT5G14740.2;AT3G01500.3;AT3G01500.1		1472.79	0	0.00223056
	YMVFACSDSR	48	8	3	AT5G14740.2;AT3G01500.3;AT3G01500.1	C6(Carbamidomethyl)	1235.52	0	9.44916e-05
	YMVFACSDSR	15	8	3	AT5G14740.2;AT3G01500.3;AT3G01500.1	M2(Oxidation); C6(Carbamidomethyl)	1251.51	0	0.000132037
	EGFVTFKK	24	5	1	AT5G14740.2		955.524	0	0.000850632
	YAGVGAAIEYAVLHLKVENIVVIGHSACGGIK	16	5	1	AT5G14740.2	C28(Carbamidomethyl)	3308.78	0	5.25491e-09
	GLMSFPLDGNNSTDFIEDWVKICLPAK	16	8	3	AT5G14740.2;AT3G01500.3;AT3G01500.1	C23(Carbamidomethyl)	3067.48	0	2.01085e-06
	KEKYETNPALYGELAK	28	8	3	AT5G14740.2;AT3G01500.3;AT3G01500.1		1853.96	0	5.98512e-06
	GNESYEDAIEALKK	9	1	1	AT5G14740.2	N-Term(Acetyl)	1608.77	0	6.13749e-07
	GNESYEDAIEALKK	10	1	1	AT5G14740.2	Y5(Phospho)	1646.72	0	0.00682914	77.5126	0.989192	S(4): 1.1; Y(5): 98.9
	VLAESESSAFEDQCGR	3	5	1	AT5G14740.2	Q13(Deamidated); C14(Carbamidomethyl)	1785.76	0	8.41771e-11
	EAVNVSLANLLTYPFVR	20	5	3	AT5G14740.2;AT3G01500.3;AT3G01500.1	N9(Deamidated)	1907.03	0	0.000743274
	ITAELQAASSSDSK	1	5	1	AT5G14740.2	Q6(Deamidated)	1408.68	0	2.41878e-08
	YAGVGAAIEYAVLHLKVENIVVIGHSACGGIK	1	5	1	AT5G14740.2	N19(Deamidated); C28(Carbamidomethyl)	3309.79	0	5.02357e-06
	YETNPALYGELAK	2	8	3	AT5G14740.2;AT3G01500.3;AT3G01500.1	N4(Deamidated)	1469.72	0	7.01147e-05
	ITAELQAASSSDSKSFDPVER	16	5	1	AT5G14740.2		2238.08	0	7.06085e-10
	DDLKDVAAAKVK	16	5	1	AT5G14740.2		1272.71	0	1.89952e-10
	GNESYEDAIEALKKLLIEK	12	1	1	AT5G14740.2		2163.15	0	0.00154836
	GNESYEDAIEALKKLLIEK	5	1	1	AT5G14740.2	N-Term(Acetyl)	2205.16	0	9.38862e-05
	EKYETNPALYGELAKGQSPK	4	8	3	AT5G14740.2;AT3G01500.3;AT3G01500.1	Q17(Deamidated)	2224.11	0	1.11859e-06
	YETNPALYGELAKGQSPK	4	8	3	AT5G14740.2;AT3G01500.3;AT3G01500.1	Q15(Deamidated)	1966.98	0	0.000328932
	KITAELQAASSSDSK	4	5	1	AT5G14740.2	Q7(Deamidated)	1536.77	0	0.00141319
	KLLIEKDDLK	20	5	1	AT5G14740.2		1214.74	9.8e-05	0.00602926
	VKKITAELQAASSSDSK	1	5	1	AT5G14740.2	Q9(Deamidated)	1763.94	0.000112	0.00586474
	GNESYEDAIEALK	3	1	1	AT5G14740.2	N-Term(Acetyl)	1480.68	0.000117	0.000638242
	NIANMVPPFDKVK	4	8	3	AT5G14740.2;AT3G01500.3;AT3G01500.1	N4(Deamidated)	1473.78	0.000119	0.000875788
	IKEGFVTFK	4	5	1	AT5G14740.2		1068.61	0.000143	0.00422038
	SFDPVER	12	5	1	AT5G14740.2		849.41	0.000414	0.0109628
	EGVVKGTLALK	8	4	1	AT5G14740.2		1114.68	0.000415	0.0100893
	KITAELQAASSSDSKSFDPVER	1	5	1	AT5G14740.2	Q7(Deamidated)	2367.18	0.000685	0.0246332
	EGFVTFK	8	5	1	AT5G14740.2		827.429	0.018141	0.418917
	GLMSFPLDGNNSTDFIEDWVK	2	8	3	AT5G14740.2;AT3G01500.3;AT3G01500.1	N10(Deamidated)	2386.1	0.038399	0.528901
	VENIVVIGHSACGGIK	1	8	3	AT5G14740.2;AT3G01500.3;AT3G01500.1	N3(Deamidated); C12(Carbamidomethyl)	1653.86	0.076527	0.809278
	EAVNVSLANLLTYPFVR	1	5	3	AT5G14740.2;AT3G01500.3;AT3G01500.1	S6(Phospho); T12(Phospho)	2065.98	0.57572	1	0	0.333333	S(6): 66.7; T(12): 66.7; Y(13): 66.7
AT5G52310.1	low-temperature-responsive protein 78 (LTI78) / desiccation-responsive protein 29A (RD29A)	94.93	1	66	67	2709
	Sequence	# PSMs	# Proteins	# Protein Groups	Protein Group Accessions	Modifications	MH+ [Da]	q-Value	PEP	pRS Score	pRS Probability	pRS Site Probabilities
	FPGESGVVFPVGFGDESGAELEK	128	1	1	AT5G52310.1		2354.12	0	1.34683e-10
	NEYSPESDGGLGAPLGGNFPVR	84	1	1	AT5G52310.1		2233.05	0	1.08318e-10
	LPISGGGSGVEEQR	16	1	1	AT5G52310.1		1385.7	0	1.48014e-09
	DQETESAVTTKLPISGGGSGVEEQR	80	1	1	AT5G52310.1		2575.24	0	3.54321e-12
	EETGGVPEIAESFGNMEVTDESPDQKPGQFER	100	1	1	AT5G52310.1		3509.57	0	1.34414e-08
	NSPMGFGSESGAELEK	10	1	1	AT5G52310.1	M4(Oxidation)	1655.72	0	6.20853e-10
	TESGNDKNSPMGFGSESGAELEK	36	1	1	AT5G52310.1		2371.03	0	3.43895e-09
	VNVETPITLEEESAVSDYLSGVSNYQSK	68	1	1	AT5G52310.1		3058.48	0	9.58121e-07
	IKGWFGGGATDEVKPESPHSVEEAPK	68	1	1	AT5G52310.1		2752.35	0	7.91163e-12
	NSPMGFGSESGAELEK	32	1	1	AT5G52310.1		1639.72	0	6.62097e-09
	SPHSVEESPQSLGSTVVPVQK	72	1	1	AT5G52310.1		2192.11	0	2.05634e-09
	SSGWFGGGATEEVKPK	52	1	1	AT5G52310.1		1636.8	0	1.69619e-08
	TESGNDKNSPMGFGSESGAELEK	11	1	1	AT5G52310.1	M11(Oxidation)	2387.03	0	1.0513e-13
	HGQSNEHEQDHDLVEEDDDDDELEPEVIDAPGVTGKPR	92	1	1	AT5G52310.1		4265.86	0	1.42716e-12
	SDDVEVETELGR	40	1	1	AT5G52310.1		1348.62	0	4.06245e-07
	EETGGVPEIAESFGNMEVTDESPDQKPGQFER	15	1	1	AT5G52310.1	M16(Oxidation)	3525.55	0	1.96595e-09
	DVPTGFDGEPDFLAK	48	1	1	AT5G52310.1		1607.76	0	5.69678e-05
	DSPAKFPGESGVVFPVGFGDESGAELEK	72	1	1	AT5G52310.1		2852.36	0	2.76156e-08
	VFPVVSSDYTKPTESVPVQEASYGHDAPAHSVR	76	1	1	AT5G52310.1		3556.72	0	7.94377e-08
	ETHHESLNTPVSLLSGTEDVTSTFAPSGDDEYLDGQR	84	1	1	AT5G52310.1		4004.8	0	1.43581e-05
	ETHHESLNTPVSLLSGTEDVTSTFAPSGDDEYLDGQRK	40	1	1	AT5G52310.1		4132.92	0	1.05075e-08
	TETLDQFSPELSHPK	80	1	1	AT5G52310.1		1728.84	0	1.99359e-07
	EFDQDFDSVLGK	28	1	1	AT5G52310.1		1399.64	0	5.09071e-06
	GWFGGGATDEVKPESPHSVEEAPK	36	1	1	AT5G52310.1		2511.17	0	7.49388e-10
	ETNVPASEEIIPPGTK	112	1	1	AT5G52310.1		1681.86	0	1.7429e-10
	FASMLGYSGEIPVGDQTQVAGTVDEK	12	1	1	AT5G52310.1	M4(Oxidation)	2715.28	0	4.56448e-08
	LTPVNEKDQETESAVTTKLPISGGGSGVEEQR	32	1	1	AT5G52310.1		3356.67	0	1.11702e-10
	GRPGYGEASEEDKFPAR	96	1	1	AT5G52310.1		1865.87	0	2.13905e-07
	VTDPTKEETGGVPEIAESFGNMEVTDESPDQKPGQFER	28	1	1	AT5G52310.1		4150.89	0	2.7699e-09
	KVNVETPITLEEESAVSDYLSGVSNYQSK	76	1	1	AT5G52310.1		3186.56	0	1.01279e-07
	AASEEGEAVEEEVK	32	1	1	AT5G52310.1		1476.67	0	2.71223e-06
	FASMLGYSGEIPVGDQTQVAGTVDEK	76	1	1	AT5G52310.1		2699.28	0	3.15533e-09
	AFSDMVAEK	8	1	1	AT5G52310.1	M5(Oxidation)	1013.46	0	2.05982e-05
	VTDPTKEETGGVPEIAESFGNMEVTDESPDQKPGQFER	3	1	1	AT5G52310.1	M22(Oxidation)	4166.92	0	2.64198e-05
	DVPIHHPLSELSDR	76	1	1	AT5G52310.1		1614.82	0	2.96709e-05
	RDVPIHHPLSELSDR	48	1	1	AT5G52310.1		1770.92	0	3.44578e-07
	SDDVEVETELGRDPK	52	1	1	AT5G52310.1		1688.8	0	7.2552e-06
	TETGMDTNSPSR	24	1	1	AT5G52310.1		1295.55	0	0.000530268
	DQETESAVTTK	16	1	1	AT5G52310.1		1208.56	0	0.000443124
	LQIGGEEEK	20	1	1	AT5G52310.1		1002.51	0	0.000170204
	TETGMDTNSPSR	3	1	1	AT5G52310.1	M5(Oxidation)	1311.54	0	6.57064e-05
	AFSDMVAEK	16	1	1	AT5G52310.1		997.464	0	0.000312325
	MDQTEEPPLNTHQQHPEEVEHHENGATK	16	1	1	AT5G52310.1	N-Term(Acetyl)	3304.45	0	2.1171e-07
	SPHSVEESPQSLGSTVVPVQK	26	1	1	AT5G52310.1	S4(Phospho)	2272.08	0	1.6889e-05	144.715	0.939199	S(1): 6.1; S(4): 93.9; S(8): 0.0; S(11): 0.0; S(14): 0.0; T(15): 0.0
	GWFGGGATDEVKPESPHSVEEAPK	12	1	1	AT5G52310.1	S15(Phospho)	2591.13	0	8.12731e-07	71.7917	0.112793	T(8): 0.0; S(15): 11.3; S(18): 88.7
	DVPIHHPLSELSDR	12	1	1	AT5G52310.1	S12(Phospho)	1694.79	0	0.000599592	140.436	1	S(9): 0.0; S(12): 100.0
	IKGWFGGGATDEVKPESPHSVEEAPK	19	1	1	AT5G52310.1	S17(Phospho)	2832.32	0	0.000150004	50.1271	0.9878	T(10): 0.3; S(17): 98.8; S(20): 1.0
	MDQTEEPPLNTHQQHPEEVEHHENGATK	16	1	1	AT5G52310.1	T4(Phospho)	3342.39	0	2.13445e-05	35.8896	0.961451	T(4): 96.1; T(11): 3.8; T(27): 0.0
	EETGGVPEIAESFGNMEVTDESPDQKPGQFER	21	1	1	AT5G52310.1	N15(Deamidated)	3510.56	0	2.861e-11
	ETHHESLNTPVSLLSGTEDVTSTFAPSGDDEYLDGQRK	2	1	1	AT5G52310.1	Q36(Deamidated)	4133.91	0	4.26822e-08
	HGQSNEHEQDHDLVEEDDDDDELEPEVIDAPGVTGKPR	52	1	1	AT5G52310.1	Q9(Deamidated)	4266.85	0	1.54034e-08
	DQETESAVTTKLPISGGGSGVEEQR	10	1	1	AT5G52310.1	Q24(Deamidated)	2576.24	0	4.67821e-08
	NEYSPESDGGLGAPLGGNFPVR	2	1	1	AT5G52310.1	N18(Deamidated)	2234.03	0	1.78144e-08
	TESGNDKNSPMGFGSESGAELEK	2	1	1	AT5G52310.1	N5(Deamidated)	2372.01	0	1.06436e-11
	VTDPTKEETGGVPEIAESFGNMEVTDESPDQKPGQFER	12	1	1	AT5G52310.1	N21(Deamidated)	4151.9	0	5.06509e-09
	FASMLGYSGEIPVGDQTQVAGTVDEK	2	1	1	AT5G52310.1	Q18(Deamidated)	2700.28	0	2.27294e-06
	ETHHESLNTPVSLLSGTEDVTSTFAPSGDDEYLDGQR	10	1	1	AT5G52310.1	Q36(Deamidated)	4005.8	0	9.1847e-06
	SPHSVEESPQSLGSTVVPVQK	10	1	1	AT5G52310.1	Q20(Deamidated)	2193.1	0	7.67385e-06
	TETLDQFSPELSHPK	4	1	1	AT5G52310.1	Q6(Deamidated)	1729.83	0	2.2566e-05
	KVNVETPITLEEESAVSDYLSGVSNYQSK	22	1	1	AT5G52310.1	N3(Deamidated)	3187.57	0	0.000420339
	NESDIDKDVPTGFDGEPDFLAK	32	1	1	AT5G52310.1		2409.11	0	9.43508e-09
	NSPMGFGSESGAELEK	6	1	1	AT5G52310.1	S8(Phospho)	1719.69	0	5.82087e-06	132.928	0.996165	S(2): 0.0; S(8): 99.6; S(10): 0.4
	AASEEGEAVEEEVK	3	1	1	AT5G52310.1	S3(Phospho)	1556.63	0	8.73928e-08	142.64	1	S(3): 100.0
	HGQSNEHEQDHDLVEEDDDDDELEPEVIDAPGVTGKPR	12	1	1	AT5G52310.1	N5(Deamidated); Q9(Deamidated)	4267.85	0	2.29572e-08
	VNVETPITLEEESAVSDYLSGVSNYQSK	3	1	1	AT5G52310.1	N2(Deamidated)	3059.48	0	1.33686e-05
	MDQTEEPPLNTHQQHPEEVEHHENGATK	3	1	1	AT5G52310.1	N10(Deamidated)	3263.44	0	9.70221e-05
	AASEEGEAVEEEVKGGGGMVGR	4	1	1	AT5G52310.1	M19(Oxidation)	2163.98	0	1.58349e-05
	AASEEGEAVEEEVKGGGGMVGR	16	1	1	AT5G52310.1		2147.99	0	1.38184e-07
	SSGWFGGGATEEVKPKSPHSVEESPQSLGSTVVPVQK	24	1	1	AT5G52310.1		3809.89	0	1.00814e-05
	DQETESAVTTKLPISGGGSGVEEQR	1	1	1	AT5G52310.1	Q2(Deamidated); Q24(Deamidated)	2577.23	0	2.79106e-08
	SKEFKEFDQDFDSVLGK	8	1	1	AT5G52310.1		2018.97	0	5.76071e-08
	DYVAEKLTTEEEDK	8	1	1	AT5G52310.1		1669.78	0	1.60002e-06
	NDSGRNEYSPESDGGLGAPLGGNFPVR	8	1	1	AT5G52310.1		2762.27	0	3.41751e-06
	DQETESAVTTKLPISGGGSGVEEQRGEDK	8	1	1	AT5G52310.1		3004.44	0	7.60452e-06
	TETGMDTNSPSRSHEFDLK	2	1	1	AT5G52310.1	M5(Oxidation)	2167.95	0	0.000145117
	TETGMDTNSPSRSHEFDLK	8	1	1	AT5G52310.1		2151.96	0	9.45414e-05
	TETLDQFSPELSHPKER	16	1	1	AT5G52310.1		2013.98	0	1.7046e-05
	DSPAKFPGESGVVFPVGFGDESGAELEKDFPTR	12	1	1	AT5G52310.1		3468.66	0	0.00098886
	AFSDMVAEKLQIGGEEEK	8	1	1	AT5G52310.1		1980.96	0	1.7576e-06
	EFDQDFDSVLGKDSPAKFPGESGVVFPVGFGDESGAELEK	8	1	1	AT5G52310.1		4232.99	0	0.00473073
	TETGMDTNSPSRSHEFDLK	5	1	1	AT5G52310.1	T7(Phospho)	2231.92	0	1.29694e-05	45.8263	0.829791	T(1): 0.5; T(3): 2.5; T(7): 83.0; S(9): 13.4; S(11): 0.5; S(13): 0.0
	EETGGVPEIAESFGNMEVTDESPDQKPGQFER	1	1	1	AT5G52310.1	N15(Deamidated); Q25(Deamidated); Q29(Deamidated)	3512.54	0	2.06896e-05
	LTPVNEKDQETESAVTTKLPISGGGSGVEEQR	3	1	1	AT5G52310.1	Q9(Deamidated)	3357.67	0	4.58659e-08
	ETHHESLNTPVSLLSGTEDVTSTFAPSGDDEYLDGQR	1	1	1	AT5G52310.1	N8(Deamidated); Q36(Deamidated)	4006.8	0	0.000495174
	ISTEKAASEEGEAVEEEVKGGGGMVGR	4	1	1	AT5G52310.1		2706.29	0	1.25506e-15
	SHELDLKNESDIDKDVPTGFDGEPDFLAK	4	1	1	AT5G52310.1		3231.53	0	2.39228e-06
	FASMLGYSGEIPVGDQTQVAGTVDEKLTPVNEK	4	1	1	AT5G52310.1		3480.71	0	0.00306805
	SHDFDMKTETGMDTNSPSR	2	1	1	AT5G52310.1	M6(Oxidation); M12(Oxidation)	2187.89	0	0.000781285
	SHELDLKNESDIDK	4	1	1	AT5G52310.1		1642.79	0	0.000122158
	SHDFDMK	4	1	1	AT5G52310.1		879.365	0	0.00508257
	DVPIHHPLSELSDREESR	4	1	1	AT5G52310.1		2116.04	0	0.00259351
	RDVPIHHPLSELSDREESR	4	1	1	AT5G52310.1		2272.14	0	0.00245838
	ETHHESLNTPVSLLSGTEDVTSTFAPSGDDEYLDGQRK	1	1	1	AT5G52310.1	N8(Deamidated); Q36(Deamidated)	4134.92	0	4.77272e-06
	VFPVVSSDYTKPTESVPVQEASYGHDAPAHSVR	1	1	1	AT5G52310.1	Q19(Deamidated)	3557.73	0	1.08874e-07
	SSGWFGGGATEEVKPKSPHSVEESPQSLGSTVVPVQK	2	1	1	AT5G52310.1	Q26(Deamidated)	3810.89	0	0.00154817
	HGQSNEHEQDHDLVEEDDDDDELEPEVIDAPGVTGKPR	1	1	1	AT5G52310.1	Q3(Deamidated); N5(Deamidated); Q9(Deamidated)	4268.84	0	0.00364554
	SHELDLK	16	1	1	AT5G52310.1		841.438	9.8e-05	0.00287659
	DEKTEEPKQSTYTEK	8	1	1	AT5G52310.1		1812.85	9.8e-05	0.00334553
	EEKRDVPIHHPLSELSDR	4	1	1	AT5G52310.1		2157.1	0.0001	0.000753723
	EFDQKNDSGRNEYSPESDGGLGAPLGGNFPVR	12	1	1	AT5G52310.1		3409.57	0.000442	0.00617776
	EFKEFDQDFDSVLGK	8	1	1	AT5G52310.1		1803.85	0.000484	0.0141215
	SSGWFGGGATEEVKPKSPHSVEESPQSLGSTVVPVQK	22	1	1	AT5G52310.1	S1(Phospho)	3889.87	0.000644	0.00955201	22.188	0.137606	S(1): 13.8; S(2): 13.8; T(10): 13.8; S(17): 13.8; S(20): 13.8; S(24): 13.8; S(27): 13.8; S(30): 2.9; T(31): 0.8
	EFDQKNDSGRNEYSPESDGGLGAPLGGNFPVR	3	1	1	AT5G52310.1	N11(Deamidated)	3410.57	0.001584	0.0430398
	GRPGYGEASEEDKFPAR	1	1	1	AT5G52310.1	S9(Phospho)	1945.84	0.001813	0.0521044	49.7341	0.993588	Y(5): 0.6; S(9): 99.4
	EFDQDFDSVLGKDSPAKFPGESGVVFPVGFGDESGAELEK	1	1	1	AT5G52310.1	Q4(Deamidated)	4233.99	0.002214	0.048762
	DDFEETRDEK	4	1	1	AT5G52310.1		1283.54	0.002582	0.0730694
	SHEFDLK	12	3	2	AT5G52300.2;AT5G52310.1		875.425	0.002658	0.0900005
	LQIGGEEEKKETTTK	8	1	1	AT5G52310.1		1690.88	0.002845	0.0685179
	DEFKESR	4	1	1	AT5G52310.1		910.424	0.003256	0.0875823
	RDVPIHHPLSELSDR	8	1	1	AT5G52310.1	S10(Phospho)	1850.89	0.00397	0.122544	20.0206	0.5	S(10): 50.0; S(13): 50.0
	KVNVETPITLEEESAVSDYLSGVSNYQSK	3	1	1	AT5G52310.1	N3(Deamidated); Q27(Deamidated)	3188.54	0.007339	0.210619
	GEDKSVSGRDYVAEK	4	1	1	AT5G52310.1		1639.79	0.02659	0.531601
	LQIGGEEEKK	8	1	1	AT5G52310.1		1130.6	0.033922	0.645669
AT5G04430.1	binding to TOMV RNA 1L (long form)	76.04	2	20	20	593
	Sequence	# PSMs	# Proteins	# Protein Groups	Protein Group Accessions	Modifications	MH+ [Da]	q-Value	PEP	pRS Score	pRS Probability	pRS Site Probabilities
	ISPLDNTFYGLSDR	24	2	1	AT5G04430.1		1597.78	0	7.90637e-07
	FLVSNAAAGSVIGK	24	2	1	AT5G04430.1		1333.75	0	3.03639e-07
	NIMEITQMTGAR	16	2	1	AT5G04430.1		1364.66	0	2.64886e-05
	EVVNGLELILDK	24	2	1	AT5G04430.1		1341.76	0	6.13786e-06
	LHSELHAEDGNEVEPR	52	2	1	AT5G04430.1		1831.85	0	1.09006e-07
	NIMEITQMTGAR	6	2	1	AT5G04430.1	M3(Oxidation)	1380.66	0	3.37325e-05
	LVTLSGTFEEQMR	24	2	1	AT5G04430.1		1510.76	0	5.59262e-06
	IRLVVPNSSCGGIIGK	24	2	1	AT5G04430.1	C10(Carbamidomethyl)	1669.94	0	1.77969e-05
	AIQQAETMIK	5	2	1	AT5G04430.1	M8(Oxidation)	1148.59	0	5.55431e-06
	AIQQAETMIK	12	2	1	AT5G04430.1		1132.6	0	0.000494106
	AIDLILAK	8	2	1	AT5G04430.1		856.55	0	0.000114054
	NQEFFPGTTDR	24	2	1	AT5G04430.1		1311.59	0	4.06419e-05
	RSPEPHDSSEADSAEKPTHIR	56	2	1	AT5G04430.1		2346.1	0	2.97895e-06
	RSPEPHDSSEADSAEKPTHIR	105	2	1	AT5G04430.1	S8(Phospho)	2426.07	0	5.61157e-05	58.1882	0.0530894	S(2): 89.4; S(8): 5.3; S(9): 5.3; S(13): 0.0; T(18): 0.0
	SPEPHDSSEADSAEKPTHIR	37	2	1	AT5G04430.1	S1(Phospho)	2269.96	0	2.26222e-06	32.9385	0.951527	S(1): 95.2; S(7): 2.2; S(8): 2.2; S(12): 0.4; T(17): 0.1
	RSPEPHDSSEADSAEKPTHIR	37	2	1	AT5G04430.1	S2(Phospho); S8(Phospho)	2506.03	0	9.55055e-06	43.9403	0.477182	S(2): 95.5; S(8): 52.2; S(9): 52.2; S(13): 0.1; T(18): 0.0
	IIMISGSIK	20	2	1	AT5G04430.1		961.574	0	0.00133353
	MESTESYAAGSPEELAK	2	2	1	AT5G04430.1	N-Term(Acetyl)	1841.8	0	1.70829e-05
	SPEPHDSSEADSAEKPTHIR	18	2	1	AT5G04430.1	S1(Phospho); S8(Phospho)	2349.94	0	0.00771391	16.4239	0.280605	S(1): 58.2; S(7): 58.2; S(8): 62.7; S(12): 13.1; T(17): 7.9
	FLVSNAAAGSVIGKGGSTITEFQAK	24	2	1	AT5G04430.1		2453.29	0	3.06352e-08
	LVTLSGTFEEQMR	4	2	1	AT5G04430.1	M12(Oxidation)	1526.75	0	1.51608e-06
	SPEPHDSSEADSAEKPTHIR	12	2	1	AT5G04430.1		2190	0	9.04587e-06
	LTEDDHYSQNVHSPYSYAAGYNSVNYAPNGSGGKYQNHK	8	1	1	AT5G04430.1		4332.93	0	0.00123548
	GGSTITEFQAK	8	2	1	AT5G04430.1		1138.57	0	0.0019873
	NIMEITQMTGAR	1	2	1	AT5G04430.1	M3(Oxidation); M8(Oxidation)	1396.65	0	9.76796e-05
	LTEDDHYSQNVHSPYSYAAGYNSVNYAPNGSGGK	8	1	1	AT5G04430.1		3662.6	5.2e-05	0.00059546
	LVVPNSSCGGIIGK	4	2	1	AT5G04430.1	C8(Carbamidomethyl)	1400.75	5.2e-05	0.00062726
	ISDRGDFMSGTTDRK	2	2	1	AT5G04430.1	M8(Oxidation)	1701.78	0.000238	0.00577934
	ISDRGDFMSGTTDRK	4	2	1	AT5G04430.1		1685.79	0.000954	0.0406721
AT4G27430.1	COP1-interacting protein 7	10.59	1	5	6	37
	Sequence	# PSMs	# Proteins	# Protein Groups	Protein Group Accessions	Modifications	MH+ [Da]	q-Value	PEP	pRS Score	pRS Probability	pRS Site Probabilities
	HYSEDVGEVQASQEKPVSPK	6	1	1	AT4G27430.1	S18(Phospho)	2294.02	0	0.000180173	98.8012	0.999992	Y(2): 0.0; S(3): 0.0; S(12): 0.0; S(18): 100.0
	YYFSPAVSEIDISTPPATEADHSR	16	1	1	AT4G27430.1		2653.24	0	8.95121e-07
	KSVTFSETNMEEK	2	1	1	AT4G27430.1	M10(Oxidation)	1545.7	0	0.000198602
	QVDALPAVASVDDFK	4	1	1	AT4G27430.1		1574.8	0	0.00261994
	ELHSLPSEETAR	8	1	1	AT4G27430.1		1368.67	0	0.000287402
	EQDVKPTLLPWTPEIDFETNTLAQRTSR	1	1	1	AT4G27430.1	T19(Phospho); T21(Phospho); T26(Phospho)	3525.55	0.536831	1	1.37255	0.0229975	T(7): 60.0; T(12): 41.3; T(19): 41.3; T(21): 38.2; T(26): 53.0; S(27): 66.3
AT1G56220.4	Dormancy/auxin associated family protein	52.29	4	4	4	141
	Sequence	# PSMs	# Proteins	# Protein Groups	Protein Group Accessions	Modifications	MH+ [Da]	q-Value	PEP	pRS Score	pRS Probability	pRS Site Probabilities
	SYGEDSLPEEAVK	8	4	1	AT1G56220.4		1423.66	0	2.84156e-06
	GLLDHLWDDTVAGPRPENGLGK	20	4	1	AT1G56220.4		2360.19	0	6.92981e-07
	KHHTFSFRPSSGNDQSEAGSAR	40	4	1	AT1G56220.4		2403.11	0	0.000421109
	HHTFSFRPSSGNDQSEAGSAR	40	4	1	AT1G56220.4		2275.02	0	0.00184188
	HHTFSFRPSSGNDQSEAGSAR	16	4	1	AT1G56220.4	S5(Phospho)	2354.99	0	7.29063e-05	35.5315	0.578527	T(3): 13.7; S(5): 57.9; S(9): 13.7; S(10): 13.7; S(15): 1.1; S(19): 0.1
	KHHTFSFRPSSGNDQSEAGSAR	16	4	1	AT1G56220.4	T4(Phospho)	2483.08	0	2.0249e-05	19.9446	0.545056	T(4): 54.5; S(6): 19.8; S(10): 8.1; S(11): 8.1; S(16): 8.1; S(20): 1.2
	KHHTFSFRPSSGNDQSEAGSAR	1	4	1	AT1G56220.4	N13(Deamidated)	2404.11	0.071016	0.743011
AT1G70730.1	Phosphoglucomutase/phosphomannomutase family protein	59.66	3	17	25	435
	Sequence	# PSMs	# Proteins	# Protein Groups	Protein Group Accessions	Modifications	MH+ [Da]	q-Value	PEP	pRS Score	pRS Probability	pRS Site Probabilities
	YNMENGGPAPESITDK	5	4	2	AT1G70730.1;AT1G23190.1	M3(Oxidation)	1738.76	0	9.68332e-09
	YNMENGGPAPESITDK	8	4	2	AT1G70730.1;AT1G23190.1		1722.76	0	4.0864e-09
	FFVTPSDSVAIIAANAVGAIPYFSSGLKGVAR	76	3	1	AT1G70730.1		3225.72	0	2.73681e-09
	FFVTPSDSVAIIAANAVGAIPYFSSGLK	64	3	1	AT1G70730.1		2842.49	0	1.0069e-05
	IFVEELGAPESSLLNCVPK	8	3	1	AT1G70730.1	C16(Carbamidomethyl)	2102.08	0	1.32907e-05
	VSLVSTSPIDGQKPGTSGLR	32	2	1	AT1G70730.1		1999.08	0	3.45536e-08
	VFKQPNYLENFVQATFNALTTEK	20	3	1	AT1G70730.1		2702.37	0	2.872e-08
	VDISTIGITSFEGPEGK	8	3	1	AT1G70730.1		1749.89	0	1.73031e-06
	GIHPEVANVASADEFEYKDPVDGSVSK	32	3	1	AT1G70730.1		2860.36	0	3.49981e-10
	DSQDALGPLVDVALK	8	3	1	AT1G70730.1		1540.82	0	0.000142033
	EDFGGGHPDPNLTYAK	16	4	2	AT1G70730.1;AT1G23190.1		1717.78	0	5.80519e-05
	LVTVEDIVR	8	3	1	AT1G70730.1		1043.61	0	0.00107634
	LSGTGSEGATIR	8	4	2	AT1G70730.1;AT1G23190.1		1148.59	0	6.49905e-06
	SMPTSAALDVVAK	4	4	2	AT1G70730.1;AT1G23190.1	M2(Oxidation)	1305.67	0	0.000111899
	VSFKVSLVSTSPIDGQKPGTSGLR	20	1	1	AT1G70730.1		2460.34	0	4.77714e-06
	RVWVGQNSLLSTPAVSAIIR	8	3	1	AT1G70730.1		2167.23	0	0.00024439
	FTFCYDALHGVAGAYAHR	12	4	2	AT1G70730.1;AT1G23190.1	C4(Carbamidomethyl)	2055.95	0	2.74788e-08
	VKVFKQPNYLENFVQATFNALTTEK	16	3	1	AT1G70730.1		2929.55	0	0.000149346
	VKGATLVVSGDGR	12	4	2	AT1G70730.1;AT1G23190.1		1258.71	0	7.45313e-07
	ATGAFILTASHNPGGPTEDFGIK	11	4	2	AT1G70730.1;AT1G23190.1	T8(Phospho)	2381.11	0	0.00107478	52.6286	0.863501	T(2): 0.4; T(8): 86.4; S(10): 13.2; T(17): 0.0
	FFVTPSDSVAIIAANAVGAIPYFSSGLK	1	3	1	AT1G70730.1	N15(Deamidated)	2843.51	0	2.87219e-06
	TDDAGGEPPEFGAAADGDADR	16	3	1	AT1G70730.1		2033.83	0	5.44156e-10
	ATGAFILTASHNPGGPTEDFGIK	8	4	2	AT1G70730.1;AT1G23190.1		2301.15	0	2.50593e-08
	FFVTPSDSVAIIAANAVGAIPYFSSGLKGVAR	3	3	1	AT1G70730.1	N15(Deamidated)	3226.72	0	2.72224e-07
	RFFVTPSDSVAIIAANAVGAIPYFSSGLKGVAR	2	3	1	AT1G70730.1	N16(Deamidated)	3382.82	0	0.000131538
	ELMGLLVK	8	3	1	AT1G70730.1		902.538	0.000278	0.00356399
	VKVFKQPNYLENFVQATFNALTTEK	8	3	1	AT1G70730.1	Q6(Deamidated)	2930.55	0.000322	0.00843172
	GIHPEVANVASADEFEYKDPVDGSVSKHQGIR	1	3	1	AT1G70730.1	Q29(Deamidated)	3452.67	0.000376	0.0049698
	SIFDFESIKK	8	3	1	AT1G70730.1		1213.65	0.000506	0.0146226
	SMPTSAALDVVAKNLGLK	4	3	1	AT1G70730.1		1815.01
AT1G23190.1	Phosphoglucomutase/phosphomannomutase family protein	48.89	1	15	22	439
	Sequence	# PSMs	# Proteins	# Protein Groups	Protein Group Accessions	Modifications	MH+ [Da]	q-Value	PEP	pRS Score	pRS Probability	pRS Site Probabilities
	YNMENGGPAPESITDK	5	4	2	AT1G70730.1;AT1G23190.1	M3(Oxidation)	1738.76	0	9.68332e-09
	YNMENGGPAPESITDK	8	4	2	AT1G70730.1;AT1G23190.1		1722.76	0	4.0864e-09
	FFVTPSDSVAIIAANAIGAIPYFSSGLK	44	1	1	AT1G23190.1		2856.51	0	2.8433e-08
	ESQEALSPLVDLALK	8	1	1	AT1G23190.1		1612.88	0	2.38819e-06
	VFKQPNYLENFVQATFNALTAEK	52	1	1	AT1G23190.1		2672.37	0	6.49157e-08
	EDFGGGHPDPNLTYAK	16	4	2	AT1G70730.1;AT1G23190.1		1717.78	0	5.80519e-05
	LSGTGSEGATIR	8	4	2	AT1G70730.1;AT1G23190.1		1148.59	0	6.49905e-06
	SMPTSAALDVVAK	4	4	2	AT1G70730.1;AT1G23190.1	M2(Oxidation)	1305.67	0	0.000111899
	NTLLSTPAVSAVIR	16	1	1	AT1G23190.1		1441.84	0	0.000846507
	VSTVSTSPIDGQKPGTSGLR	28	1	1	AT1G23190.1		1987.04	0	1.84207e-08
	VFKVSTVSTSPIDGQKPGTSGLR	32	1	1	AT1G23190.1		2361.27	0	9.05386e-08
	IFVEELGAQESALLNCTPK	4	1	1	AT1G23190.1	C16(Carbamidomethyl)	2119.07	0	0.00018403
	FTFCYDALHGVAGAYAHR	12	4	2	AT1G70730.1;AT1G23190.1	C4(Carbamidomethyl)	2055.95	0	2.74788e-08
	VKGATLVVSGDGR	12	4	2	AT1G70730.1;AT1G23190.1		1258.71	0	7.45313e-07
	ATGAFILTASHNPGGPTEDFGIK	11	4	2	AT1G70730.1;AT1G23190.1	T8(Phospho)	2381.11	0	0.00107478	52.6286	0.863501	T(2): 0.4; T(8): 86.4; S(10): 13.2; T(17): 0.0
	FFVTPSDSVAIIAANAIGAIPYFSSGLKGVAR	8	1	1	AT1G23190.1	N15(Deamidated)	3240.75	0	3.40506e-10
	SDTGGEPPEFGAAADGDADR	4	1	1	AT1G23190.1		1934.8	0	5.34586e-09
	FFVTPSDSVAIIAANAIGAIPYFSSGLKGVAR	60	1	1	AT1G23190.1		3239.74	0	7.33661e-08
	ATGAFILTASHNPGGPTEDFGIK	8	4	2	AT1G70730.1;AT1G23190.1		2301.15	0	2.50593e-08
	VKVFKQPNYLENFVQATFNALTAEK	40	1	1	AT1G23190.1		2899.53	0	1.02683e-07
	VKVFKQPNYLENFVQATFNALTAEK	20	1	1	AT1G23190.1	N12(Deamidated)	2900.52	0	0.000769483
	RVWVGKNTLLSTPAVSAVIR	4	1	1	AT1G23190.1		2167.27	0	0.00161582
	ESQEALSPLVDLALKLSK	4	1	1	AT1G23190.1		1941.09	0	0.00287408
	FFVTPSDSVAIIAANAIGAIPYFSSGLK	1	1	1	AT1G23190.1	N15(Deamidated)	2857.51	0	0.000241411
	VFKQPNYLENFVQATFNALTAEK	10	1	1	AT1G23190.1	N10(Deamidated)	2673.37	0	0.00104067
	LVSVEDIVR	8	1	1	AT1G23190.1		1029.59	9.8e-05	0.00295388
	QPNYLENFVQATFNALTAEK	4	1	1	AT1G23190.1		2298.14	9.8e-05	0.00280797
	DAVQIIIK	8	1	1	AT1G23190.1		899.557	0.000143	0.0058554
AT1G37130.1	nitrate reductase 2	21.81	2	12	13	178
	Sequence	# PSMs	# Proteins	# Protein Groups	Protein Group Accessions	Modifications	MH+ [Da]	q-Value	PEP	pRS Score	pRS Probability	pRS Site Probabilities
	SNAELEPSVLDPR	8	1	1	AT1G37130.1		1426.72	0	2.48657e-06
	KGGALNVCFEGSEDLPGGAGTAGSK	8	1	1	AT1G37130.1	C8(Carbamidomethyl)	2379.12	0	1.72373e-07
	AHQNQTTNQTVFLKPAK	32	1	1	AT1G37130.1		1926.02	0	3.5577e-06
	SDSPKAHQNQTTNQTVFLKPAK	40	1	1	AT1G37130.1		2440.25	0	1.05381e-07
	LTGKHPFNSEAPLNR	12	1	1	AT1G37130.1		1680.88	0	2.89653e-06
	LMHHGFITPVPLHYVR	2	2	1	AT1G37130.1	M2(Oxidation)	1933.03	0	3.33505e-06
	LMHHGFITPVPLHYVR	8	2	1	AT1G37130.1		1917.03	0	0.00033949
	SDSPKAHQNQTTNQTVFLKPAK	3	1	1	AT1G37130.1	S1(Phospho)	2520.22	0	3.04182e-05	25.4637	0.119436	S(1): 11.9; S(3): 11.9; T(11): 11.9; T(12): 52.2; T(15): 11.9
	FLMDHPGGSDSILINAGTDCTEEFEAIHSDK	3	1	1	AT1G37130.1	M3(Oxidation); C20(Carbamidomethyl)	3422.51	0	6.08358e-06
	VHDDDEDVSSEDENETHNSNAVYYK	12	1	1	AT1G37130.1	S9(Phospho)	2991.14	0	1.95268e-09	82.9281	0.868174	S(9): 86.8; S(10): 13.2; T(16): 0.0; S(19): 0.0; Y(23): 0.0; Y(24): 0.0
	LEPGLNGVVR	16	1	1	AT1G37130.1		1053.61	0	0.000338432
	SYKPPVPGRSDSPK	16	1	1	AT1G37130.1		1514.79	0	0.00439804
	DEYTADSWIER	4	1	1	AT1G37130.1		1384.59	0.000143	0.00801508
	AKVPVQLVEK	12	1	1	AT1G37130.1		1110.69	0.000338	0.0108603
	FLMDHPGGSDSILINAGTDCTEEFEAIHSDK	1	1	1	AT1G37130.1	N15(Deamidated); C20(Carbamidomethyl)	3407.51	0.000527	0.015331
	GYAYSGGGKKVTR	1	1	1	AT1G37130.1	S5(Phospho)	1423.67			12.5184	0.315015	Y(2): 31.5; Y(4): 31.5; S(5): 31.5; T(12): 5.5
AT5G61210.1	soluble N-ethylmaleimide-sensitive factor adaptor protein 33	36	1	7	7	102
	Sequence	# PSMs	# Proteins	# Protein Groups	Protein Group Accessions	Modifications	MH+ [Da]	q-Value	PEP	pRS Score	pRS Probability	pRS Site Probabilities
	DSGGIENQSVQELEGYAVYK	24	1	1	AT5G61210.1		2186.02	0	1.48476e-09
	TLVMLHDQGEQITR	16	1	1	AT5G61210.1		1640.84	0	1.58832e-05
	SSKPNPFDSDDESDNKHTLNPSKR	17	1	1	AT5G61210.1	S9(Phospho)	2795.22	0	2.94277e-11	42.6978	0.971431	S(1): 0.9; S(2): 0.9; S(9): 97.1; S(13): 0.9; T(18): 0.2; S(22): 0.0
	THHKAVEIDHDLSR	28	1	1	AT5G61210.1		1657.84	0	0.000185887
	DSGGIENQSVQELEGYAVYK	3	1	1	AT5G61210.1	Q11(Deamidated)	2187.02	0	4.18206e-06
	AKQDDGLSDLSDILGELK	8	1	1	AT5G61210.1		1916.98	0	1.36778e-05
	VQKGDSSSSKQSLFSNSK	4	1	1	AT5G61210.1		1913.95	0.000806	0.0180953
	SSKPNPFDSDDESDNKHTLNPSK	2	1	1	AT5G61210.1	S13(Phospho)	2639.11	0.011263	0.228431	6.5595	0.107966	S(1): 10.8; S(2): 10.8; S(9): 58.9; S(13): 10.8; T(18): 5.8; S(22): 2.8
AT2G17410.2	ARID/BRIGHT DNA-binding domain-containing protein	8.85	2	3	3	32
	Sequence	# PSMs	# Proteins	# Protein Groups	Protein Group Accessions	Modifications	MH+ [Da]	q-Value	PEP	pRS Score	pRS Probability	pRS Site Probabilities
	IDEGEANNLNLAGDGSGAVDHDYLTK	8	2	1	AT2G17410.2		2688.23	0	3.63924e-06
	LEDRPSEHLSETSMNVEK	4	2	1	AT2G17410.2		2100.98	0	0.000359749
	HSEENQSPHHHANNVMEQDQAAEER	9	2	1	AT2G17410.2	S2(Phospho)	3004.19	0	0.000111394	60.1132	0.970717	S(2): 97.1; S(7): 2.9
	HSEENQSPHHHANNVMEQDQAAEER	8	2	1	AT2G17410.2		2924.23	5.2e-05	0.00158384
	LEDRPSEHLSETSMNVEK	1	2	1	AT2G17410.2	N15(Deamidated)	2101.98	5.9e-05	0.000702804
	LEDRPSEHLSETSMNVEK	2	2	1	AT2G17410.2	M14(Oxidation)	2116.97	0.000415	0.0110069
AT1G21380.1	Target of Myb protein 1	32.81	1	9	10	177
	Sequence	# PSMs	# Proteins	# Protein Groups	Protein Group Accessions	Modifications	MH+ [Da]	q-Value	PEP	pRS Score	pRS Probability	pRS Site Probabilities
	VQILALYALETLSK	8	2	2	AT1G21380.1;AT1G76970.1		1561.92	0	1.43637e-08
	ILSLLDTWQEAFGGSGGRFPQYYNAYNELR	16	1	1	AT1G21380.1		3465.68	0	1.34457e-08
	FPQYYNAYNELR	8	1	1	AT1G21380.1		1577.74	0	0.000115081
	TNKRPEYFQHNVPQHSSSASESSYDDLLGQSR	52	1	1	AT1G21380.1		3664.69	0	5.37283e-07
	KDDKPEDILFK	8	1	1	AT1G21380.1		1347.71	0	6.78502e-06
	NLSLNPTASAAPVTPPK	16	1	1	AT1G21380.1		1677.91	0	2.34641e-07
	DLMDFAK	16	1	1	AT1G21380.1		839.396	0	0.00105622
	SPEHALFTKPVYDQTEQLPPAPWETQEPR	24	1	1	AT1G21380.1	S1(Phospho)	3471.61	0	0.000240623	58.4939	0.773456	S(1): 77.3; T(8): 10.5; Y(12): 10.5; T(15): 1.6; T(25): 0.0
	ILSLLDTWQEAFGGSGGRFPQYYNAYNELR	4	1	1	AT1G21380.1	Q9(Deamidated)	3466.69	0	4.28519e-07
	VMALVNTTSDEELMCQGLALNDNLQR	5	1	1	AT1G21380.1	C15(Carbamidomethyl); N21(Deamidated)	2936.39	0	8.77523e-05
	NLSLNPTASAAPVTPPKKDDKPEDILFK	16	1	1	AT1G21380.1		3006.61	0	6.97735e-07
	NLSLNPTASAAPVTPPKKDDKPEDILFK	4	1	1	AT1G21380.1	N5(Deamidated)	3007.61	0.001211	0.0238895
AT2G45290.1	Transketolase	19.3	1	1	15	356
	Sequence	# PSMs	# Proteins	# Protein Groups	Protein Group Accessions	Modifications	MH+ [Da]	q-Value	PEP	pRS Score	pRS Probability	pRS Site Probabilities
	VTTTIGYGSPNKANSYSVHGAALGEK	44	3	2	AT2G45290.1;AT3G60750.1		2622.31	0	6.20697e-09
	ANSYSVHGAALGEK	48	3	2	AT2G45290.1;AT3G60750.1		1403.69	0	5.11613e-07
	VTTTIGYGSPNK	20	3	2	AT2G45290.1;AT3G60750.1		1237.64	0	1.23777e-05
	NLSQQCLNALAK	52	3	2	AT2G45290.1;AT3G60750.1	C6(Carbamidomethyl)	1359.71	0	7.98057e-06
	FEALGWHVIWVK	20	3	2	AT2G45290.1;AT3G60750.1		1484.8	0	1.09506e-05
	FLAIDAVEK	32	3	2	AT2G45290.1;AT3G60750.1		1005.56	0	0.00178615
	YNPKNPYWFNR	20	3	2	AT2G45290.1;AT3G60750.1		1498.72	0	0.000118356
	TPGHPENFETPGVEATTGPLGQGIANAVGLALAEK	8	1	1	AT2G45290.1	T17(Phospho)	3523.73	0	0.00127526	5.94472	0.293502	T(1): 29.4; T(10): 11.9; T(16): 29.4; T(17): 29.4
	NLSQQCLNALAK	30	3	2	AT2G45290.1;AT3G60750.1	N1(Deamidated); C6(Carbamidomethyl)	1360.69	0	2.20244e-05
	FLAIDAVEKAK	20	3	2	AT2G45290.1;AT3G60750.1		1204.69	0	0.000295071
	AFGNFQKATPEER	8	1	1	AT2G45290.1	N4(Deamidated)	1495.71	0	0.00197891
	NPYWFNR	8	3	2	AT2G45290.1;AT3G60750.1		996.47	5.2e-05	0.00130146
	ESVLPSDVSAR	8	3	2	AT2G45290.1;AT3G60750.1		1159.59	0.000143	0.00725769
	AFGNFQK	10	1	1	AT2G45290.1	N4(Deamidated)	812.393	0.000414	0.0142416
	NPYWFNRDR	4	3	2	AT2G45290.1;AT3G60750.1		1267.6	0.00225	0.0839592
	KYPEEAAELK	24	1	1	AT2G45290.1		1177.61
AT5G16880.1	Target of Myb protein 1	29.73	2	6	6	68
	Sequence	# PSMs	# Proteins	# Protein Groups	Protein Group Accessions	Modifications	MH+ [Da]	q-Value	PEP	pRS Score	pRS Probability	pRS Site Probabilities
	DNESLAPIFTPAR	8	2	1	AT5G16880.1		1430.72	0	0.000416663
	IIETAGENEALLFEALNVNDELVK	16	1	1	AT5G16880.1		2644.38	0	1.2309e-07
	NSIELLSTVLSSSPQHDALQDDLTTTLVQQCR	12	2	1	AT5G16880.1	C31(Carbamidomethyl)	3569.78	0	2.83056e-07
	LIDDPQTVVNNR	8	2	1	AT5G16880.1		1383.72	0	0.00015401
	YEEMNKPSAPLTSHEPAMIPVAEEPDDSPIHGR	4	1	1	AT5G16880.1	S28(Phospho)	3724.66	0	1.46417e-05	22.9076	0.967133	Y(1): 0.5; S(8): 0.7; T(12): 0.9; S(13): 1.2; S(28): 96.7
	NSIELLSTVLSSSPQHDALQDDLTTTLVQQCR	15	2	1	AT5G16880.1	Q20(Deamidated); C31(Carbamidomethyl)	3570.76	0	5.89053e-05
	GIRFPGRDNESLAPIFTPAR	4	2	1	AT5G16880.1		2214.18	0.006571	0.181788
	NSIELLSTVLSSSPQHDALQDDLTTTLVQQCR	1	2	1	AT5G16880.1	N1(Deamidated); Q15(Deamidated); C31(Carbamidomethyl)	3571.75	0.504839	1
AT4G15545.1	unknown protein; BEST Arabidopsis thaliana protein match is: unknown protein (TAIR:AT1G16520.1); Has 30201 Blast hits to 17322 proteins in 780 species: Archae - 12; Bacteria - 1396; Metazoa - 17338; Fungi - 3422; Plants - 5037; Viruses - 0; Other Eukaryotes - 2996 (source: NCBI BLink).	82.79	1	20	21	386
	Sequence	# PSMs	# Proteins	# Protein Groups	Protein Group Accessions	Modifications	MH+ [Da]	q-Value	PEP	pRS Score	pRS Probability	pRS Site Probabilities
	TLMMSLQDDDQNAGTTQIIAKPTPNDDDTPFQPSR	24	1	1	AT4G15545.1		3861.78	0	1.09552e-11
	VSALESESSDLR	8	1	1	AT4G15545.1		1292.63	0	3.92102e-09
	TLMMSLQDDDQNAGTTQIIAKPTPNDDDTPFQPSR	14	1	1	AT4G15545.1	M3(Oxidation)	3877.76	0	4.2529e-09
	LSYEQFGAFLGNVK	28	1	1	AT4G15545.1		1572.8	0	7.19346e-08
	SFDLPDELLQVLPSDPFEQLDVARK	12	1	1	AT4G15545.1		2871.48	0	7.78976e-06
	EFEELQSHVESLEASLSDAFHK	8	1	1	AT4G15545.1		2532.19	0	1.3436e-09
	SRLSYEQFGAFLGNVK	32	1	1	AT4G15545.1		1815.94	0	1.07935e-07
	EKEFEELQSHVESLEASLSDAFHK	24	1	1	AT4G15545.1		2789.32	0	7.69735e-09
	LSLADGEKENLIR	8	1	1	AT4G15545.1		1457.8	0	0.000220696
	SFDLPDELLQVLPSDPFEQLDVAR	36	1	1	AT4G15545.1		2743.38	0	1.6987e-05
	KITSIALSTR	12	1	1	AT4G15545.1		1089.66	0	0.000116958
	SSISISEPGSQTAR	24	1	1	AT4G15545.1		1419.7	0	9.7695e-05
	KAEEIFGGDNRDLYVIFEGLITR	12	1	1	AT4G15545.1		2655.37	0	3.62747e-06
	RHSVSFATTR	16	1	1	AT4G15545.1		1161.61	0	0.00528719
	SEIEEEEEEGSASAITGSR	4	1	1	AT4G15545.1	N-Term(Acetyl)	2051.89	0	2.91256e-11
	TLMMSLQDDDQNAGTTQIIAKPTPNDDDTPFQPSR	18	1	1	AT4G15545.1	Q17(Deamidated)	3862.79	0	1.11231e-06
	EFEELQSHVESLEASLSDAFHK	1	1	1	AT4G15545.1	Q6(Deamidated)	2533.18	0	6.395e-08
	HSSIQSQQASEAIEPAATDNENDAPKPSLSASLPLVSQTTTPR	11	1	1	AT4G15545.1	T41(Phospho)	4554.15	0	0.00011821	13.3534	0.438171	S(2): 2.0; S(3): 2.0; S(6): 2.0; S(10): 2.0; T(18): 2.0; S(28): 2.0; S(30): 2.0; S(32): 2.0; S(37): 13.3; T(39): 13.3; T(40): 13.3; T(41): 43.8
	LTPPGSPPILSASGTPK	3	1	1	AT4G15545.1	T2(Phospho); S6(Phospho)	1779.83	0	0.0015179	72.3185	0.999183	T(2): 100.0; S(6): 99.9; S(11): 0.1; S(13): 0.0; T(15): 0.0
	AEEIFGGDNRDLYVIFEGLITR	24	1	1	AT4G15545.1		2527.28	0	5.51576e-05
	DLYVIFEGLITR	16	1	1	AT4G15545.1		1438.79	0	4.77486e-07
	HSSIQSQQASEAIEPAATDNENDAPKPSLSASLPLVSQTTTPR	4	1	1	AT4G15545.1		4474.2	5.2e-05	0.00170296
	DVSKLEGFRK	16	1	1	AT4G15545.1		1178.65	0.000519	0.00901415
	LTPPGSPPILSASGTPK	12	1	1	AT4G15545.1	S6(Phospho)	1699.86	0.000865	0.0147585	49.7341	0.980297	T(2): 0.1; S(6): 98.0; S(11): 0.6; S(13): 0.6; T(15): 0.6
	SFDLPDELLQVLPSDPFEQLDVAR	1	1	1	AT4G15545.1	Q10(Deamidated); Q19(Deamidated)	2745.37	0.001231	0.0272738
	HSSIQSQQASEAIEPAATDNENDAPKPSLSASLPLVSQTTTPR	6	1	1	AT4G15545.1	N20(Deamidated)	4475.2	0.001309	0.0255554
	SFDLPDELLQVLPSDPFEQLDVARK	2	1	1	AT4G15545.1	Q10(Deamidated)	2872.47	0.001584	0.0473342
	KAEEIFGGDNR	4	1	1	AT4G15545.1		1235.6	0.001719	0.0545925
	AEEIFGGDNRDLYVIFEGLITR	1	1	1	AT4G15545.1	N9(Deamidated)	2528.28	0.015769	0.283739
	LTPPGSPPILSASGTPK	4	1	1	AT4G15545.1		1619.9	0.019924	0.541834
	LSYEQFGAFLGNVKDLNAHKQTR	1	1	1	AT4G15545.1	T22(Phospho)	2716.31	0.085049	0.947411	18.8883	0.967164	S(2): 1.6; Y(3): 1.6; T(22): 96.7
AT1G01100.1	60S acidic ribosomal protein family	95.54	2	4	8	143
	Sequence	# PSMs	# Proteins	# Protein Groups	Protein Group Accessions	Modifications	MH+ [Da]	q-Value	PEP	pRS Score	pRS Probability	pRS Site Probabilities
	NVTDLIMNVGAGGGGGAPVAAAAPAAGGGAAAAPAAEEK	52	1	1	AT1G01100.1		3302.65	0	3.62392e-08
	AAGVSIESYWPMLFAK	20	2	1	AT1G01100.1		1769.89	0	1.38974e-05
	NVTDLIMNVGAGGGGGAPVAAAAPAAGGGAAAAPAAEEK	8	1	1	AT1G01100.1	M7(Oxidation)	3318.64	0	1.04129e-09
	RNVTDLIMNVGAGGGGGAPVAAAAPAAGGGAAAAPAAEEK	28	1	1	AT1G01100.1		3458.75	0	5.30159e-08
	AAGVSIESYWPMLFAK	2	2	1	AT1G01100.1	M12(Oxidation)	1785.89	0	2.99102e-06
	NVTDLIMNVGAGGGGGAPVAAAAPAAGGGAAAAPAAEEKK	8	1	1	AT1G01100.1		3430.73	0	1.4191e-14
	STVGELACSYAVMILEDEGIAITADK	6	3	2	AT1G01100.1;AT5G47700.1	N-Term(Acetyl); C8(Carbamidomethyl)	2798.35	0	3.65241e-09
	KKDEPAEESDGDLGFGLFD	9	3	2	AT1G01100.1;AT5G47700.1	S9(Phospho)	2148.9	0	5.51523e-05	176.445	1	S(9): 100.0
	RNVTDLIMNVGAGGGGGAPVAAAAPAAGGGAAAAPAAEEK	2	1	1	AT1G01100.1	N9(Deamidated)	3459.74	6.2e-05	0.000534403
	STVGELACSYAVMILEDEGIAITADKIATLVK	1	3	2	AT1G01100.1;AT5G47700.1	N-Term(Acetyl); C8(Carbamidomethyl)	3423.77	0.000143	0.0055279
	STVGELACSYAVMILEDEGIAITADK	4	3	2	AT1G01100.1;AT5G47700.1	C8(Carbamidomethyl); S9(Phospho)	2836.32	0.000976	0.0167202	48.3366	0.249999	S(1): 25.0; T(2): 25.0; S(9): 25.0; Y(10): 25.0; T(23): 0.0
	NVTDLIMNVGAGGGGGAPVAAAAPAAGGGAAAAPAAEEK	2	1	1	AT1G01100.1	N8(Deamidated)	3303.65	0.006337	0.200063
	RNVTDLIMNVGAGGGGGAPVAAAAPAAGGGAAAAPAAEEKK	1	1	1	AT1G01100.1	N2(Deamidated); N9(Deamidated)	3588.82
AT5G47700.1	60S acidic ribosomal protein family	95.58	1	3	8	109
	Sequence	# PSMs	# Proteins	# Protein Groups	Protein Group Accessions	Modifications	MH+ [Da]	q-Value	PEP	pRS Score	pRS Probability	pRS Site Probabilities
	RNVTDLIMNVGAGGGGGAPVAAAAPAAGGGAAAAAPAAEEK	4	1	1	AT5G47700.1		3529.77	0	2.20217e-08
	NVTDLIMNVGAGGGGGAPVAAAAPAAGGGAAAAAPAAEEK	52	1	1	AT5G47700.1		3373.68	0	8.28437e-11
	NVTDLIMNVGAGGGGGAPVAAAAPAAGGGAAAAAPAAEEK	5	1	1	AT5G47700.1	M7(Oxidation)	3389.67	0	4.07396e-09
	AAGVTIESYWPMLFAK	16	1	1	AT5G47700.1		1783.91	0	4.16677e-05
	STVGELACSYAVMILEDEGIAITADK	6	3	2	AT1G01100.1;AT5G47700.1	N-Term(Acetyl); C8(Carbamidomethyl)	2798.35	0	3.65241e-09
	NVTDLIMNVGAGGGGGAPVAAAAPAAGGGAAAAAPAAEEK	5	1	1	AT5G47700.1	N8(Deamidated)	3374.67	0	0.00409115
	KKDEPAEESDGDLGFGLFD	9	3	2	AT1G01100.1;AT5G47700.1	S9(Phospho)	2148.9	0	5.51523e-05	176.445	1	S(9): 100.0
	STVGELACSYAVMILEDEGIAITADKIATLVK	1	3	2	AT1G01100.1;AT5G47700.1	N-Term(Acetyl); C8(Carbamidomethyl)	3423.77	0.000143	0.0055279
	STVGELACSYAVMILEDEGIAITADK	4	3	2	AT1G01100.1;AT5G47700.1	C8(Carbamidomethyl); S9(Phospho)	2836.32	0.000976	0.0167202	48.3366	0.249999	S(1): 25.0; T(2): 25.0; S(9): 25.0; Y(10): 25.0; T(23): 0.0
	NVTDLIMNVGAGGGGGAPVAAAAPAAGGGAAAAAPAAEEKKK	4	1	1	AT5G47700.1	M7(Oxidation)	3645.85
	NVTDLIMNVGAGGGGGAPVAAAAPAAGGGAAAAAPAAEEKK	3	1	1	AT5G47700.1	M7(Oxidation)	3517.77
AT4G25890.1	60S acidic ribosomal protein family	36.97	1	2	3	58
	Sequence	# PSMs	# Proteins	# Protein Groups	Protein Group Accessions	Modifications	MH+ [Da]	q-Value	PEP	pRS Score	pRS Probability	pRS Site Probabilities
	QHEGELESSASSTYELQR	28	1	1	AT4G25890.1		2050.93	0	1.07505e-06
	GVFTFVCK	24	1	1	AT4G25890.1	C7(Carbamidomethyl)	957.486	0	0.00171676
	KKEESEEEEGDFGFDLFG	6	3	2	AT4G25890.1;AT5G57290.3	S5(Phospho)	2171.87	0	1.91048e-05	105.154	1	S(5): 100.0
AT5G57290.3	60S acidic ribosomal protein family	37.82	3	3	4	178
	Sequence	# PSMs	# Proteins	# Protein Groups	Protein Group Accessions	Modifications	MH+ [Da]	q-Value	PEP	pRS Score	pRS Probability	pRS Site Probabilities
	QHEGDLEASASSTYDLQR	116	3	1	AT5G57290.3		2006.9	0	4.75797e-09
	QHEGDLEASASSTYDLQRK	16	3	1	AT5G57290.3		2135	0	1.77478e-06
	KKEESEEEEGDFGFDLFG	6	3	2	AT4G25890.1;AT5G57290.3	S5(Phospho)	2171.87	0	1.91048e-05	105.154	1	S(5): 100.0
	GVFSFVCK	40	3	1	AT5G57290.3	C7(Carbamidomethyl)	943.47	5.3e-05	0.00189186
AT2G43160.3	ENTH/VHS family protein	6.15	2	3	4	27
	Sequence	# PSMs	# Proteins	# Protein Groups	Protein Group Accessions	Modifications	MH+ [Da]	q-Value	PEP	pRS Score	pRS Probability	pRS Site Probabilities
	VETFDEFDPR	16	2	1	AT2G43160.3		1254.56	0	0.000139272
	KFSEQNIGAPPSYEEAVSDSR	5	2	1	AT2G43160.3	S3(Phospho)	2391.05	0	4.91943e-05	105.765	0.999999	S(3): 100.0; S(12): 0.0; Y(13): 0.0; S(18): 0.0; S(20): 0.0
	GLVNFNISGSK	4	1	1	AT2G43160.3		1135.61	0	0.00599619
	KKSQSLVALVNDK	2	2	1	AT2G43160.3	Q4(Deamidated)	1430.83
AT3G05900.1	neurofilament protein-related	40.56	1	15	16	196
	Sequence	# PSMs	# Proteins	# Protein Groups	Protein Group Accessions	Modifications	MH+ [Da]	q-Value	PEP	pRS Score	pRS Probability	pRS Site Probabilities
	EIISSDSADVVNDKPASDSNPVVTK	28	1	1	AT3G05900.1		2587.28	0	1.81904e-07
	HVVDEPANEEKPSESSAALSPEK	36	1	1	AT3G05900.1		2450.17	0	2.52846e-09
	YVVDEPSKDETTSESGSALCPEK	4	1	1	AT3G05900.1	C20(Carbamidomethyl)	2528.13	0	3.27858e-06
	VAEVVETAPVAK	12	1	1	AT3G05900.1		1212.68	0	7.95414e-05
	HVVEEPLKDEQENVSEAK	36	1	1	AT3G05900.1		2080.02	0	8.36012e-07
	VKDVEALEVEPKPETSEK	12	1	1	AT3G05900.1		2027.05	0	7.62548e-06
	ASDSHTPTVTTPEKPLENK	7	1	1	AT3G05900.1	N-Term(Acetyl)	2094.03	0	1.03027e-06
	ESPAVVEEVGAVVK	4	1	1	AT3G05900.1		1412.76	0	0.000736648
	HVVDEPANEEKPSESSAALSPEK	4	1	1	AT3G05900.1	S20(Phospho)	2530.14	0	9.25173e-07	81.6252	0.997043	S(13): 0.1; S(15): 0.1; S(16): 0.1; S(20): 99.7
	LAAEDENIKKDTDTPVAEGK	16	1	1	AT3G05900.1		2144.07	0	0.000532792
	AITEEKHVVEEPSKDEK	16	1	1	AT3G05900.1		1967.99	0	0.00119509
	EETEGDAAAPADVIEK	8	1	1	AT3G05900.1		1644.76	0	3.21562e-07
	ASDSHTPTVTTPEKPLENKVSEEAK	2	1	1	AT3G05900.1	N-Term(Acetyl)	2737.34	0	3.93228e-05
	KETEEDVSSPADIIEK	4	1	1	AT3G05900.1		1789.87	0	2.0586e-05
	ELETEVEVVK	4	1	1	AT3G05900.1		1174.62	0.000246	0.00536015
	QVESVDVQSVRDVSAEIAEEKVK	1	1	1	AT3G05900.1	Q1(Deamidated)	2545.3	0.021816	0.364099
	EAPAKQKHSNSIISK	2	1	1	AT3G05900.1	S9(Phospho)	1717.87			27.6635	0.919166	S(9): 91.9; S(11): 7.5; S(14): 0.6
AT1G52380.1	NUP50 (Nucleoporin 50 kDa) protein	64.32	1	19	20	389
	Sequence	# PSMs	# Proteins	# Protein Groups	Protein Group Accessions	Modifications	MH+ [Da]	q-Value	PEP	pRS Score	pRS Probability	pRS Site Probabilities
	GITFACVNSVSEGK	24	1	1	AT1G52380.1	C6(Carbamidomethyl)	1468.71	0	7.93863e-05
	RKEPSAAPVAASNPFAGIQLVPTTAPASTPVGTNAPLAESK	40	1	1	AT1G52380.1		4014.13	0	0.00251812
	LILNASLYPEMK	20	1	1	AT1G52380.1		1391.76	0	3.39298e-06
	VAIDKHKDSKPMEK	32	1	1	AT1G52380.1		1625.86	0	0.00020596
	NGDNGAFSSFQQHSSNK	20	1	1	AT1G52380.1		1824.79	0	1.95589e-05
	FKDPTIVEEFR	24	1	1	AT1G52380.1		1380.71	0	0.000854819
	SALPLKTPENSPTATDT	20	1	1	AT1G52380.1		1742.88	0	3.14937e-06
	DNPGLDDDDDSAELESGTFKK	24	1	1	AT1G52380.1		2267.98	0	0.000895106
	EGLSTFALK	24	1	1	AT1G52380.1		965.529	0	0.00518794
	EGNGIEEADKNGDNGAFSSFQQHSSNK	6	1	1	AT1G52380.1	Q21(Deamidated)	2868.24	0	8.18588e-09
	EKEGNGIEEADKNGDNGAFSSFQQHSSNK	6	1	1	AT1G52380.1	N16(Deamidated)	3125.38	0	4.82932e-05
	SADVQVAATEVAQMVSCDTNVCNNAVEGTDQTDFPLEK	6	1	1	AT1G52380.1	Q13(Deamidated); C17(Carbamidomethyl); C22(Carbamidomethyl)	4114.83	0	0.000172324
	DNPGLDDDDDSAELESGTFK	12	1	1	AT1G52380.1		2139.88	0	5.30329e-11
	LAPAEAVVEDNQK	16	1	1	AT1G52380.1		1383.71	0	2.32741e-07
	LAPAEAVVEDNQKASDIEEGDEVDSK	8	1	1	AT1G52380.1	S15(Phospho)	2838.25	0	1.78523e-06	76.5156	1	S(15): 100.0; S(25): 0.0
	SADVQVAATEVAQMVSCDTNVCNNAVEGTDQTDFPLEK	20	1	1	AT1G52380.1	Q13(Deamidated); C17(Carbamidomethyl); C22(Carbamidomethyl); N23(Deamidated)	4115.82	0	2.00246e-06
	GKGELKVNVSSNDGK	20	1	1	AT1G52380.1		1531.81	0	0.00140734
	SADVQVAATEVAQMVSCDTNVCNNAVEGTDQTDFPLEK	8	1	1	AT1G52380.1	C17(Carbamidomethyl); C22(Carbamidomethyl)	4113.82	0	2.16507e-06
	LILNASLYPEMK	2	1	1	AT1G52380.1	M11(Oxidation)	1407.75	0	1.53691e-05
	SEGSGFPPKQEVSTETGEENEK	24	1	1	AT1G52380.1		2366.06	0	2.83368e-08
	EKEGNGIEEADKNGDNGAFSSFQQHSSNK	8	1	1	AT1G52380.1		3124.37	0	0.00249538
	KGITFACVNSVSEGK	8	1	1	AT1G52380.1	C7(Carbamidomethyl)	1596.8	0	0.0015404
	KEPSAAPVAASNPFAGIQLVPTTAPASTPVGTNAPLAESK	4	1	1	AT1G52380.1		3858.02	0	4.48504e-05
	LAPAEAVVEDNQK	2	1	1	AT1G52380.1	N11(Deamidated)	1384.7	0	0.00590351
	RKEPSAAPVAASNPFAGIQLVPTTAPASTPVGTNAPLAESK	3	1	1	AT1G52380.1	N13(Deamidated)	4015.13	0.000218	0.00865335
	DNPGLDDDDDSAELESGTFKK	1	1	1	AT1G52380.1	N2(Deamidated)	2268.98	0.000694	0.021164
	EGNGIEEADKNGDNGAFSSFQQHSSNK	4	1	1	AT1G52380.1		2867.24	0.001554	0.0448316
	SALPLKTPENSPTATDT	1	1	1	AT1G52380.1	N10(Deamidated)	1743.87	0.012038	0.261923
	EKEGNGIEEADKNGDNGAFSSFQQHSSNK	1	1	1	AT1G52380.1	N16(Deamidated); N28(Deamidated)	3126.37	0.050203	0.801517
	GDSENVQQPSKKR	1	1	1	AT1G52380.1	Q7(Deamidated)	1473.72
AT3G57410.1	villin 3	35.75	1	20	25	413
	Sequence	# PSMs	# Proteins	# Protein Groups	Protein Group Accessions	Modifications	MH+ [Da]	q-Value	PEP	pRS Score	pRS Probability	pRS Site Probabilities
	AAALAALTSAFNSSSGR	24	1	1	AT3G57410.1		1594.82	0	2.80586e-07
	AAAVAALSQVLTAEK	44	1	1	AT3G57410.1		1442.82	0	2.64953e-07
	IYQFNGANSNIQER	16	2	2	AT2G41740.1;AT3G57410.1		1653.79	0	1.06886e-06
	AFSEVEATEEATEAK	24	1	1	AT3G57410.1		1611.74	0	8.27799e-16
	AALLLGTHHVVEDQSSSGNQGPR	16	1	1	AT3G57410.1		2373.19	0	5.50811e-08
	EAYLSEVEFK	24	1	1	AT3G57410.1		1214.59	0	0.000409319
	EEEEVSPAAEASAEEAKPK	44	1	1	AT3G57410.1		2000.93	0	1.26251e-09
	KTAIQAAEDFVASENRPK	8	1	1	AT3G57410.1		1975.03	0	3.53108e-08
	KAALLLGTHHVVEDQSSSGNQGPR	8	1	1	AT3G57410.1		2501.28	0	0.000254465
	EIQGHESDKFLSYFKPCIIPLEGGVASGFK	16	2	2	AT2G41740.1;AT3G57410.1	C17(Carbamidomethyl)	3353.68	0	6.76958e-05
	SEKPVTGIDFK	40	1	1	AT3G57410.1		1220.65	0	0.000142518
	VIQGYEPHSFK	16	1	1	AT3G57410.1		1304.66	0	0.000934724
	IFEGKEPPQFVALFQHMVVLK	4	1	1	AT3G57410.1		2457.33	0	1.56775e-05
	AAAVAALSQVLTAEKK	20	1	1	AT3G57410.1		1570.91	0	9.60867e-05
	GSSGETYTPESIALIQVSGTGVHNNK	8	1	1	AT3G57410.1		2646.3	0	0.000327892
	AEALAALTSAFNSSPSSKSPPRR	27	1	1	AT3G57410.1	S19(Phospho)	2425.18	0	2.06252e-06	32.9933	0.121839	T(8): 0.4; S(9): 3.5; S(13): 12.2; S(14): 47.4; S(16): 12.2; S(17): 12.2; S(19): 12.2
	TVELDAALGGR	4	3	2	AT4G30160.1;AT3G57410.1		1101.59	0	0.00293449
	QDDSEVETTGVTFTYER	8	1	1	AT3G57410.1		1976.87	0	2.97066e-08
	ESFYKLPGWKQDLLK	8	1	1	AT3G57410.1		1852	0	0.000170031
	AEALAALTSAFNSSPSSKSPPR	14	1	1	AT3G57410.1	S17(Phospho)	2269.08	0	1.86407e-07	57.1652	0.738014	T(8): 1.5; S(9): 1.5; S(13): 1.5; S(14): 1.5; S(16): 10.0; S(17): 73.8; S(19): 10.0
	IENFEPVPVPK	8	1	1	AT3G57410.1		1268.69	5.2e-05	0.000843503
	GKVAALLK	20	2	2	AT2G41740.1;AT3G57410.1		799.539	9.8e-05	0.00291414
	AEALAALTSAFNSSPSSK	4	1	1	AT3G57410.1		1751.89	0.000246	0.00612673
	VAEFLKPGTTIK	4	1	1	AT3G57410.1		1303.76	0.001648	0.0381803
	KVASEDEIIPETTPPK	4	1	1	AT3G57410.1		1753.92
AT3G15040.1	Protein of unknown function, DUF584	57.2	1	6	6	63
	Sequence	# PSMs	# Proteins	# Protein Groups	Protein Group Accessions	Modifications	MH+ [Da]	q-Value	PEP	pRS Score	pRS Probability	pRS Site Probabilities
	LTDVVDDDEEEEEGEMLPPHEIVAR	36	1	1	AT3G15040.1		2866.28	0	1.9679e-11
	LDFSSPSSLATISDSADGELNEDDIFAIDISHAPPQAR	2	1	1	AT3G15040.1	N21(Deamidated); Q36(Deamidated)	4003.88	0	1.62288e-06
	SLAQSSLLSCSVLEGAGR	10	1	1	AT3G15040.1	C10(Carbamidomethyl); S11(Phospho)	1914.9	0	3.1532e-06	100.507	0.999755	S(1): 0.0; S(5): 0.0; S(6): 0.0; S(9): 0.0; S(11): 100.0
	LDFSSPSSLATISDSADGELNEDDIFAIDISHAPPQAR	2	1	1	AT3G15040.1	Q36(Deamidated)	4002.88	0	8.79751e-07
	LPFSASFVGGGKYPQSAPVQVPLVSSAMMNR	5	1	1	AT3G15040.1	S16(Phospho)	3302.6	0.00103	0.0274955	28.2685	0.785163	S(4): 2.7; S(6): 5.6; Y(13): 12.5; S(16): 78.5; S(25): 0.3; S(26): 0.3
	HSPVSSPAKQQTPAR	4	1	1	AT3G15040.1		1590.83	0.005189	0.134549
	AIPTAPKPPQER	4	1	1	AT3G15040.1		1304.73	0.014327	0.335295
AT5G43830.1	Aluminium induced protein with YGL and LRDR motifs	25.1	1	4	5	59
	Sequence	# PSMs	# Proteins	# Protein Groups	Protein Group Accessions	Modifications	MH+ [Da]	q-Value	PEP	pRS Score	pRS Probability	pRS Site Probabilities
	FAFILFDSVKK	8	1	1	AT5G43830.1		1314.75	0	0.000127911
	GCFFTSSGGLR	20	2	2	AT3G22850.1;AT5G43830.1	C2(Carbamidomethyl)	1188.54	0	0.000559473
	SFEHPKNELKPVPR	24	1	1	AT5G43830.1		1677.9	0	1.2847e-05
	VDSSGDVCGATFKVDAETKR	6	1	1	AT5G43830.1	S3(Phospho); C8(Carbamidomethyl)	2221.97	0	0.000264756	35.4581	0.0361055	S(3): 3.6; S(4): 3.6; T(11): 92.8; T(18): 0.0
	MLAVFEK	1	1	1	AT5G43830.1	N-Term(Acetyl)	879.464	0.000432	0.0119498
AT5G55230.1	microtubule-associated proteins 65-1	29.47	2	9	9	77
	Sequence	# PSMs	# Proteins	# Protein Groups	Protein Group Accessions	Modifications	MH+ [Da]	q-Value	PEP	pRS Score	pRS Probability	pRS Site Probabilities
	AELLQTLSDANAELSSLTMSLGDK	16	2	1	AT5G55230.1		2507.25	0	4.71603e-12
	AVTDTESPHLGEITCGTLLEK	12	2	1	AT5G55230.1	C15(Carbamidomethyl)	2271.11	0	3.81228e-07
	ETLNRPAAPTNYVAISK	28	2	1	AT5G55230.1		1844.98	0	3.69998e-06
	EEAASSPVSGAADHQVPASP	1	2	1	AT5G55230.1	S19(Phospho)	1986.84	0	6.2791e-07	112.83	1	S(5): 0.0; S(6): 0.0; S(9): 0.0; S(19): 100.0
	IMSLIDSGNVEPTELLADMDSQISK	4	2	1	AT5G55230.1		2706.31	5.2e-05	0.00134954
	KVQEQPHVEQESAFSTRPSPARPVSAKK	4	2	1	AT5G55230.1		3118.63	5.2e-05	0.00119565
	IPAMVDTLVAK	4	2	1	AT5G55230.1		1157.66	9.8e-05	0.00256321
	KLDDFQSQLQELQK	4	2	1	AT5G55230.1		1719.9	0.000372	0.00830448
	VREFSDVQSQIQK	4	2	1	AT5G55230.1		1563.8	0.003638	0.124161
AT4G38710.1	glycine-rich protein	20.13	2	9	9	66
	Sequence	# PSMs	# Proteins	# Protein Groups	Protein Group Accessions	Modifications	MH+ [Da]	q-Value	PEP	pRS Score	pRS Probability	pRS Site Probabilities
	STEHSEEDAQEEEPAVEGAK	1	1	1	AT4G38710.1	Q10(Deamidated)	2172.92	0	0.00164356
	STEHSEEDAQEEEPAVEGAK	4	1	1	AT4G38710.1		2171.91	0	6.48005e-05
	DIAAAMEKPNEK	4	2	1	AT4G38710.1		1316.65	0	0.000970166
	KEETEGEQAVEEAK	8	2	1	AT4G38710.1		1576.73	0	9.16445e-06
	ERGSGGGFFESQSQSK	16	2	1	AT4G38710.1		1687.76	0	2.30844e-05
	TLPVAVVEVVKPESPVLVIVEKPK	8	2	1	AT4G38710.1		2569.55	0	2.57767e-06
	KSTEHSEEDAQEEEPAVEGAK	8	1	1	AT4G38710.1		2300.01	0	6.24361e-05
	TLPVAVVEVVKPESPVLVIVEKPK	1	2	1	AT4G38710.1	S14(Phospho)	2649.51	0	0.000476253	22.0311	0.963978	T(1): 3.6; S(14): 96.4
	LKDIAAAMEKPNEK	4	2	1	AT4G38710.1	M8(Oxidation)	1573.82	5.4e-05	0.00083423
	KEETEGEQAVEEAKK	4	2	1	AT4G38710.1		1704.82	0.001382	0.0368436
	STEHSEEDAQEEEPAVEGAKK	8	1	1	AT4G38710.1		2300.01	0.032271	0.496328
AT5G53620.1	unknown protein; INVOLVED IN: biological_process unknown; EXPRESSED IN: 23 plant structures; EXPRESSED DURING: 13 growth stages; Has 28929 Blast hits to 19542 proteins in 1425 species: Archae - 211; Bacteria - 3079; Metazoa - 14558; Fungi - 2157; Plants - 966; Viruses - 80; Other Eukaryotes - 7878 (source: NCBI BLink).	3.81	1	1	1	11
	Sequence	# PSMs	# Proteins	# Protein Groups	Protein Group Accessions	Modifications	MH+ [Da]	q-Value	PEP	pRS Score	pRS Probability	pRS Site Probabilities
	LDSHSQNQKPEELNGQVSPDEHSGAK	8	1	1	AT5G53620.1		2831.31	0	7.21386e-06
	LDSHSQNQKPEELNGQVSPDEHSGAK	3	1	1	AT5G53620.1	S18(Phospho)	2911.27	9.8e-05	0.000601327	12.3768	0.682316	S(3): 6.4; S(5): 9.4; S(18): 68.2; S(23): 16.0
AT1G64500.1	Glutaredoxin family protein	31.79	1	8	9	113
	Sequence	# PSMs	# Proteins	# Protein Groups	Protein Group Accessions	Modifications	MH+ [Da]	q-Value	PEP	pRS Score	pRS Probability	pRS Site Probabilities
	YLGGAAEVTAMNENGK	8	1	1	AT1G64500.1		1624.76	0	2.56757e-09
	AIMEQQGVVVDER	24	1	1	AT1G64500.1		1473.74	0	1.12161e-06
	DVSLDAGVLSELK	16	1	1	AT1G64500.1		1345.72	0	1.19639e-05
	ANVVADVYKPPPSSFAVFDVNAIQEPWLK	16	1	1	AT1G64500.1		3201.64	0	0.000125215
	SIAAQIPTTMVK	8	1	1	AT1G64500.1		1259.7	0	0.000344279
	SIAAQIPTTMVK	5	1	1	AT1G64500.1	M10(Oxidation)	1275.7	0	0.000259784
	GRYLGGAAEVTAMNENGK	8	1	1	AT1G64500.1		1837.89	0	0.000168599
	AIMEQQGVVVDER	4	1	1	AT1G64500.1	M3(Oxidation)	1489.73	0	1.18896e-05
	SVKENIFVKR	8	1	1	AT1G64500.1		1219.71	0	0.00296715
	KSASFHTLDELEVR	15	1	1	AT1G64500.1	S2(Phospho)	1711.8	0.000372	0.00770678	68.6916	0.499352	S(2): 49.9; S(4): 49.9; T(7): 0.1
	CNENGLIR	1	1	1	AT1G64500.1	C1(Carbamidomethyl); N4(Deamidated)	976.448	0.477718	1
AT5G55160.1	small ubiquitin-like modifier 2	54.37	2	4	8	178
	Sequence	# PSMs	# Proteins	# Protein Groups	Protein Group Accessions	Modifications	MH+ [Da]	q-Value	PEP	pRS Score	pRS Probability	pRS Site Probabilities
	QSVDFNSIAFLFDGR	24	2	1	AT5G55160.1		1715.84	0	2.63318e-08
	VKGQDGNEVFFR	52	2	2	AT4G26840.1;AT5G55160.1		1395.7	0	4.66293e-05
	GQDGNEVFFR	28	2	2	AT4G26840.1;AT5G55160.1		1168.54	0	0.00122375
	LMNAYCDR	6	3	2	AT4G26840.1;AT5G55160.1	M2(Oxidation); C6(Carbamidomethyl)	1058.44	0	0.000307234
	QSVDFNSIAFLFDGRR	32	2	1	AT5G55160.1		1871.94	0	0.000123209
	SATPEEDKKPDQGAHINLK	10	2	1	AT5G55160.1	N-Term(Acetyl)	2120.06	0	3.35985e-07
	KPDQGAHINLK	16	2	1	AT5G55160.1		1220.67	0	0.00106037
	KLMNAYCDR	8	3	2	AT4G26840.1;AT5G55160.1	C7(Carbamidomethyl)	1170.54	0	0.000463574
	SATPEEDKKPDQGAHINLK	2	2	1	AT5G55160.1	S1(Phospho); T3(Phospho)	2237.97	0.000487	0.00798287	30.6119	1	S(1): 100.0; T(3): 100.0
AT2G24270.2	aldehyde dehydrogenase 11A3	80.44	2	24	25	462
	Sequence	# PSMs	# Proteins	# Protein Groups	Protein Group Accessions	Modifications	MH+ [Da]	q-Value	PEP	pRS Score	pRS Probability	pRS Site Probabilities
	DSGIGSQGVTNSINLMTK	36	2	1	AT2G24270.2		1821.9	0	1.84144e-09
	DACIVLDDADLDLVASNIIK	24	2	1	AT2G24270.2	C3(Carbamidomethyl)	2173.11	0	3.96679e-09
	INSVEEGINHCNASNFGLQGCVFTK	20	2	1	AT2G24270.2	C11(Carbamidomethyl); C21(Carbamidomethyl)	2795.28	0	1.86653e-10
	GSEIGDFLTMHPAVNCISFTGGDTGISISK	8	2	1	AT2G24270.2	C16(Carbamidomethyl)	3111.49	0	2.17612e-09
	SGDLISYCAEEGVR	24	2	1	AT2G24270.2	C8(Carbamidomethyl)	1555.7	0	2.7021e-05
	DSGIGSQGVTNSINLMTK	5	2	1	AT2G24270.2	M16(Oxidation)	1837.9	0	4.95911e-07
	EIAKPAKDSVTEVVR	32	2	1	AT2G24270.2		1641.91	0	3.34852e-06
	IAWEEPFGPVVPVLR	8	2	1	AT2G24270.2		1708.94	0	8.74777e-05
	LTVGPPEENSDITAVVSESSANFIEGLVMDAK	28	2	1	AT2G24270.2		3319.63	0	0.000571894
	VKTTVINLPTPSYSMG	12	1	1	AT2G24270.2		1707.9	0	3.78744e-06
	AAAILKDNKAPMAESLVK	28	2	1	AT2G24270.2		1870.04	0	0.0026063
	IPLGVVLAIPPFNYPVNLAVSK	92	2	1	AT2G24270.2		2321.36	0	2.79688e-05
	EKGATFCQEYKR	24	2	1	AT2G24270.2	C7(Carbamidomethyl)	1516.72	0	2.35549e-05
	AAAILKDNKAPMAESLVK	5	2	1	AT2G24270.2	M12(Oxidation)	1886.04	0	1.07128e-05
	GPDHFPFQGLK	16	2	1	AT2G24270.2		1242.63	0	0.000751958
	AGTGLFAEILDGEVYK	12	2	1	AT2G24270.2	N-Term(Acetyl)	1724.87	0	1.67733e-09
	VQACTQEEVNAVMELAK	8	2	1	AT2G24270.2	C4(Carbamidomethyl)	1919.92	0	2.4611e-09
	VVLVMESVADELVEK	8	2	1	AT2G24270.2		1659.89	0	5.89453e-06
	VKTTVINLPTPSYSMG	5	1	1	AT2G24270.2	M15(Oxidation)	1723.89	0	8.404e-06
	FLLSDSFPGNDR	4	2	1	AT2G24270.2		1367.66	0	0.000320299
	AGTGLFAEILDGEVYKYYADGEWKTSSSGK	1	2	1	AT2G24270.2	N-Term(Acetyl)	3284.55	0	2.54223e-06
	DACIVLDDADLDLVASNIIK	1	2	1	AT2G24270.2	C3(Carbamidomethyl); N17(Deamidated)	2174.1	0	5.50365e-07
	AILISDAMETGTVQINSAPARGPDHFPFQGLK	3	2	1	AT2G24270.2	M8(Oxidation)	3397.72	0	0.000322528
	VQACTQEEVNAVMELAK	1	2	1	AT2G24270.2	C4(Carbamidomethyl); M13(Oxidation)	1935.91	0	5.67847e-10
	LTVGPPEENSDITAVVSESSANFIEGLVMDAK	1	2	1	AT2G24270.2	M29(Oxidation)	3335.6	0	0.000482827
	AILISDAMETGTVQINSAPARGPDHFPFQGLK	3	2	1	AT2G24270.2	Q14(Deamidated)	3382.73	0	0.00230222
	YCLTSKIPLGVVLAIPPFNYPVNLAVSK	8	2	1	AT2G24270.2	C2(Carbamidomethyl)	3073.71	8.8e-05	0.00321297
	LTVGPPEENSDITAVVSESSANFIEGLVMDAK	4	2	1	AT2G24270.2	N9(Deamidated)	3320.63	0.000119	0.00101005
	IAPALIAGNSLVLKPPTQGAVSCLHMVHCFHLAGFPK	4	2	1	AT2G24270.2	C23(Carbamidomethyl); C29(Carbamidomethyl)	3952.09	0.000143	0.00403824
	IPLGVVLAIPPFNYPVNLAVSK	2	2	1	AT2G24270.2	N13(Deamidated)	2322.35	0.00022	0.00380217
	AILISDAMETGTVQINSAPARGPDHFPFQGLK	3	2	1	AT2G24270.2	N16(Deamidated); Q29(Deamidated)	3383.71	0.000414	0.013793
	AGTGLFAEILDGEVYK	3	2	1	AT2G24270.2	T3(Phospho)	1762.82	0.000503	0.0115286	38.1569	0.999666	T(3): 100.0; Y(15): 0.0
	IAPALIAGNSLVLKPPTQGAVSCLHMVHCFHLAGFPK	1	2	1	AT2G24270.2	Q18(Deamidated); C23(Carbamidomethyl); C29(Carbamidomethyl)	3953.1	0.00066	0.0130557
	SVAIMNPATR	4	2	1	AT2G24270.2		1059.56	0.001123	0.0283573
	TKYCLTSKIPLGVVLAIPPFNYPVNLAVSK	4	2	1	AT2G24270.2	C4(Carbamidomethyl)	3302.85	0.001371	0.0566938
	TKYCLTSKIPLGVVLAIPPFNYPVNLAVSK	5	2	1	AT2G24270.2	C4(Carbamidomethyl); N21(Deamidated)	3303.85	0.007039	0.177408
	SVAIMNPATRK	10	2	1	AT2G24270.2	M5(Oxidation)	1203.66	0.009771	0.309182
	SVAIMNPATR	1	2	1	AT2G24270.2	M5(Oxidation)	1075.56	0.034834	0.659254
	GPDHFPFQGLKDSGIGSQGVTNSINLMTK	4	2	1	AT2G24270.2		3045.53	0.159319	1
AT1G45207.2	Remorin family protein	4.5	1	1	2	9
	Sequence	# PSMs	# Proteins	# Protein Groups	Protein Group Accessions	Modifications	MH+ [Da]	q-Value	PEP	pRS Score	pRS Probability	pRS Site Probabilities
	GWSSERVPLR	8	1	1	AT1G45207.2	S3(Phospho)	1266.6	0.00075	0.0148995	37.7585	0.5	S(3): 50.0; S(4): 50.0
	TVSLDLSNVTSTSPR	1	1	1	AT1G45207.2	T12(Phospho)	1656.79			45.8179	0.730289	T(1): 0.0; S(3): 0.0; S(7): 0.1; T(10): 2.4; S(11): 12.2; T(12): 73.0; S(13): 12.2
AT4G27320.1	Adenine nucleotide alpha hydrolases-like superfamily protein	66.92	1	14	16	501
	Sequence	# PSMs	# Proteins	# Protein Groups	Protein Group Accessions	Modifications	MH+ [Da]	q-Value	PEP	pRS Score	pRS Probability	pRS Site Probabilities
	LNLSAVIMGSR	28	1	1	AT4G27320.1		1160.65	0	2.18752e-06
	LNLSAVIMGSR	5	1	1	AT4G27320.1	M8(Oxidation)	1176.64	0	7.67678e-06
	IAAAASDHHEHIKDE	108	1	1	AT4G27320.1		1643.77	0	4.208e-07
	LGSVSDYCVHHCVCPVVVVR	48	2	2	AT4G27320.1;AT5G54430.1	C8(Carbamidomethyl); C12(Carbamidomethyl); C14(Carbamidomethyl)	2342.11	0	2.08336e-06
	IAAAASDHHEHIK	24	1	1	AT4G27320.1		1399.7	0	0.00024208
	YPDDRDGPAPPGNVGATR	8	1	1	AT4G27320.1		1854.86	0	0.000244421
	HSHHHSSSTPSAATPTPTAGAR	104	1	1	AT4G27320.1		2195.03	0	2.98337e-06
	IHIVKDHDMR	20	2	2	AT4G27320.1;AT5G54430.1		1263.66	0	0.000249405
	VADLAKPLKEAGFPHKIHIVK	16	1	1	AT4G27320.1		2311.36	0	2.91892e-07
	MNPDSDYPHLPNIK	6	1	1	AT4G27320.1	N-Term(Acetyl)	1682.78	0	3.16503e-07
	DGPAPPGNVGATR	20	1	1	AT4G27320.1		1208.6	0	0.000170202
	ERLCLETER	24	1	1	AT4G27320.1	C4(Carbamidomethyl)	1205.59	0	0.000338274
	DDDDDDDEDHEAKIAAAASDHHEHIKDE	4	1	1	AT4G27320.1		3158.26	0	5.59922e-09
	VADLAKPLKEAGFPHK	4	1	1	AT4G27320.1		1720.97	5.2e-05	0.00139947
	EAGFPHKIHIVK	4	1	1	AT4G27320.1		1375.78	9.8e-05	0.0014739
	IHHPSSPRHSHHHSSSTPSAATPTPTAGAR	32	1	1	AT4G27320.1	S6(Phospho)	3186.47	0.001023	0.0270912	11.2669	0.191359	S(5): 9.2; S(6): 19.1; S(10): 9.2; S(14): 9.2; S(15): 9.2; S(16): 9.2; T(17): 9.2; S(19): 9.2; T(22): 9.2; T(24): 5.0; T(26): 2.2
	RKIGVAVDLSEESAFAVR	4	1	1	AT4G27320.1		1947.07	0.001766	0.0606838
	HSHHHSSSTPSAATPTPTAGAR	40	1	1	AT4G27320.1	T16(Phospho)	2274.99	0.011442	0.343055	8.38003	0.297553	S(2): 8.8; S(6): 8.8; S(7): 8.8; S(8): 8.8; T(9): 8.8; S(11): 8.8; T(14): 8.8; T(16): 29.8; T(18): 8.8
	HSHHHSSSTPSAATPTPTAGAR	1	1	1	AT4G27320.1	S2(Phospho); T18(Phospho)	2354.96	0.180836	1	3.84905	0.0433499	S(2): 19.4; S(6): 19.4; S(7): 19.4; S(8): 19.4; T(9): 19.4; S(11): 19.4; T(14): 19.4; T(16): 32.1; T(18): 32.1
	IHHPSSPRHSHHHSSSTPSAATPTPTAGAR	1	1	1	AT4G27320.1	S10(Phospho); S14(Phospho)	3266.43	0.409423	1	2.78762	0.0257107	S(5): 20.8; S(6): 20.8; S(10): 20.8; S(14): 20.8; S(15): 20.8; S(16): 20.8; T(17): 20.8; S(19): 13.5; T(22): 13.5; T(24): 13.5; T(26): 13.5
AT3G54280.1	DNA binding;ATP binding;nucleic acid binding;binding;helicases;ATP binding;DNA binding;helicases	0.59	2	1	1	1
	Sequence	# PSMs	# Proteins	# Protein Groups	Protein Group Accessions	Modifications	MH+ [Da]	q-Value	PEP	pRS Score	pRS Probability	pRS Site Probabilities
	GTLEEKVMSLQK	1	2	1	AT3G54280.1	S9(Phospho)	1442.69	0.001053	0.0180491	67.3439	1	T(2): 0.0; S(9): 100.0
AT5G36210.1	alpha/beta-Hydrolases superfamily protein	11.78	1	4	5	39
	Sequence	# PSMs	# Proteins	# Protein Groups	Protein Group Accessions	Modifications	MH+ [Da]	q-Value	PEP	pRS Score	pRS Probability	pRS Site Probabilities
	SPITADIVSGASK	16	1	1	AT5G36210.1		1245.67	0	0.000182368
	VLVSGNDFYAFPR	4	1	1	AT5G36210.1		1484.75	0	2.03237e-05
	MLKEEGHKFESR	16	1	1	AT5G36210.1		1490.74	0	0.000222697
	SNPITTIVEVNLSGETLEEPK	2	1	1	AT5G36210.1	T16(Phospho)	2350.15	0.00135	0.0504367	16.561	0.824949	S(1): 1.9; T(5): 1.9; T(6): 1.9; S(13): 11.7; T(16): 82.5
	SFASMSSSSPDAAQTPLTTAPYGSWKSPITADIVSGASKR	1	1	1	AT5G36210.1	S38(Phospho)	4137.96	0.372051	1	1.2895	0.0842793	S(1): 6.3; S(4): 6.3; S(6): 6.3; S(7): 6.3; S(8): 6.3; S(9): 6.3; T(15): 6.5; T(18): 6.5; T(19): 6.5; Y(22): 6.5; S(24): 6.5; S(27): 7.1; T(30): 7.1; S(35): 7.1; S(38): 8.4
AT3G25070.1	RPM1 interacting protein 4	33.18	1	3	3	33
	Sequence	# PSMs	# Proteins	# Protein Groups	Protein Group Accessions	Modifications	MH+ [Da]	q-Value	PEP	pRS Score	pRS Probability	pRS Site Probabilities
	IMNPNDPEYNSDSQSQAPPHPPSSR	20	1	1	AT3G25070.1	N3(Deamidated); Q16(Deamidated)	2767.18	0	0.00293652
	IMNPNDPEYNSDSQSQAPPHPPSSR	1	1	1	AT3G25070.1	M2(Oxidation)	2781.21	0.0001	0.000489109
	IMNPNDPEYNSDSQSQAPPHPPSSR	4	1	1	AT3G25070.1	Q14(Deamidated)	2766.2	0.000225	0.00252117
	SRPKPTNLRADESPEKVTVVPK	6	1	1	AT3G25070.1	S13(Phospho)	2528.32	0.002637	0.0893366	18.3812	0.694672	S(1): 3.1; T(6): 7.1; S(13): 69.5; T(18): 20.3
	ASQNNSYDNKSPLHKNSYDGTGK	2	1	1	AT3G25070.1	Y7(Phospho)	2605.12	0.009553	0.205742	8.05899	0.245139	S(2): 24.5; S(6): 24.5; Y(7): 24.5; S(11): 7.5; S(17): 7.5; Y(18): 7.5; T(21): 3.8
AT5G04740.1	ACT domain-containing protein	26.58	2	6	6	41
	Sequence	# PSMs	# Proteins	# Protein Groups	Protein Group Accessions	Modifications	MH+ [Da]	q-Value	PEP	pRS Score	pRS Probability	pRS Site Probabilities
	VEDPDLLEQIR	8	1	1	AT5G04740.1		1326.69	0	0.00184868
	KVEDPDLLEQIR	8	1	1	AT5G04740.1		1454.79	0	0.000294807
	IDVDIATHIHVK	4	2	1	AT5G04740.1		1360.76	0	0.000318104
	SLSQVLVNCLR	8	2	1	AT5G04740.1	C9(Carbamidomethyl)	1288.7	5.2e-05	0.00096398
	YHPECSEQLAMGETFGIKAPEKK	12	1	1	AT5G04740.1	C5(Carbamidomethyl)	2650.26	0.000871	0.0346931
	VMADVNIDVESAEIDTEGLVAK	1	2	1	AT5G04740.1	T16(Phospho)	2398.11	0.002081	0.0675241	10.0533	0.843231	S(11): 15.7; T(16): 84.3
AT1G13960.2	WRKY DNA-binding protein 4	10.27	2	2	2	6
	Sequence	# PSMs	# Proteins	# Protein Groups	Protein Group Accessions	Modifications	MH+ [Da]	q-Value	PEP	pRS Score	pRS Probability	pRS Site Probabilities
	AVVTTYEGKHNHDLPAAK	4	2	1	AT1G13960.2		1951	0	0.000148614
	DNTANINGSSINNNRGSSELGASQFQTNSSNK	2	2	1	AT1G13960.2	S30(Phospho)	3406.48	0.002885	0.0823246	2.5933	0.132261	T(3): 7.9; S(9): 8.7; S(10): 7.9; S(17): 8.7; S(18): 8.7; S(23): 18.6; T(27): 13.2; S(29): 13.2; S(30): 13.2
AT4G12420.1	Cupredoxin superfamily protein	23.51	1	10	11	161
	Sequence	# PSMs	# Proteins	# Protein Groups	Protein Group Accessions	Modifications	MH+ [Da]	q-Value	PEP	pRS Score	pRS Probability	pRS Site Probabilities
	TENLDSWYLGQETYVR	32	1	1	AT4G12420.1		1973.92	0	1.56481e-10
	ASGGFGSFVVNPR	24	1	1	AT4G12420.1		1294.65	0	3.56977e-06
	TTLNGISFK	8	1	1	AT4G12420.1		980.541	0	0.00171775
	DQIGSFFYFPSLHFQR	36	1	1	AT4G12420.1		1988.96	0	3.13527e-06
	AKGQLPPGPQDEFDKTFSMNQAR	12	1	1	AT4G12420.1		2562.23	0	3.91925e-14
	TTLNGISFKNPSTPIR	16	1	1	AT4G12420.1		1745.95	0	6.68879e-06
	DVYKLDFPKRPLTGPAK	8	1	1	AT4G12420.1		1945.09	0	0.000114552
	DQIGSFFYFPSLHFQR	2	1	1	AT4G12420.1	Q2(Deamidated)	1989.95	0	8.92043e-06
	NKLDEGLLLHWNGIQQR	4	1	1	AT4G12420.1		2034.09	0.000104	0.0024849
	RVTGVGILK	12	1	1	AT4G12420.1		942.61	0.000609	0.0108881
	RPLTGPAKVATSIINGTYR	3	1	1	AT4G12420.1	T4(Phospho); S12(Phospho)	2175.07	0.002939	0.083693	36.1086	0.909745	T(4): 99.1; T(11): 7.4; S(12): 91.8; T(17): 0.9; Y(18): 0.9
	VATSIINGTYR	4	1	1	AT4G12420.1	Y10(Phospho)	1274.61	0.552367	1	24.1928	0.495634	T(3): 0.2; S(4): 0.7; T(9): 49.6; Y(10): 49.6
AT4G00810.1	60S acidic ribosomal protein family	80.53	1	8	8	174
	Sequence	# PSMs	# Proteins	# Protein Groups	Protein Group Accessions	Modifications	MH+ [Da]	q-Value	PEP	pRS Score	pRS Probability	pRS Site Probabilities
	NVTDLIMNVGAGGGGGGAPVSAAAPAAAGGAAAAAPAKEEKK	32	1	1	AT4G00810.1		3645.87	0	2.18176e-13
	NVTDLIMNVGAGGGGGGAPVSAAAPAAAGGAAAAAPAKEEK	20	1	1	AT4G00810.1		3517.77	0	1.14376e-16
	NVTDLIMNVGAGGGGGGAPVSAAAPAAAGGAAAAAPAKEEK	3	1	1	AT4G00810.1	M7(Oxidation)	3533.76	0	5.2185e-13
	NVTDLIMNVGAGGGGGGAPVSAAAPAAAGGAAAAAPAK	48	1	1	AT4G00810.1		3131.6	0	2.26714e-07
	RNVTDLIMNVGAGGGGGGAPVSAAAPAAAGGAAAAAPAK	12	1	1	AT4G00810.1		3287.69	0	6.35382e-10
	NVTDLIMNVGAGGGGGGAPVSAAAPAAAGGAAAAAPAKEEKK	7	1	1	AT4G00810.1	M7(Oxidation)	3661.85	0	1.73514e-09
	AAGVEIESYWPMLFAK	3	1	1	AT4G00810.1	M12(Oxidation)	1827.9	0	1.38969e-05
	AAGVEIESYWPMLFAK	16	1	1	AT4G00810.1		1811.9	0	0.000128137
	NVTDLIMNVGAGGGGGGAPVSAAAPAAAGGAAAAAPAK	6	1	1	AT4G00810.1	M7(Oxidation)	3147.58	0	6.71832e-09
	STVGELACSYAVMILEDEGIAITSDK	6	1	1	AT4G00810.1	N-Term(Acetyl); C8(Carbamidomethyl)	2814.34	0	3.06445e-07
	RNVTDLIMNVGAGGGGGGAPVSAAAPAAAGGAAAAAPAKEEK	4	1	1	AT4G00810.1	N9(Deamidated)	3674.87	0	1.00139e-08
	NVTDLIMNVGAGGGGGGAPVSAAAPAAAGGAAAAAPAK	7	1	1	AT4G00810.1	N8(Deamidated)	3132.59	0	0.000245671
	STVGELACSYAVMILEDEGIAITSDKIATLVK	2	1	1	AT4G00810.1	N-Term(Acetyl); C8(Carbamidomethyl)	3439.74	0	0.000279636
	NVTDLIMNVGAGGGGGGAPVSAAAPAAAGGAAAAAPAKEEK	2	1	1	AT4G00810.1	S21(Phospho)	3597.73	0.003319	0.0936655	14.8691	0.955606	T(3): 4.4; S(21): 95.6
	NVTDLIMNVGAGGGGGGAPVSAAAPAAAGGAAAAAPAKEEKK	2	1	1	AT4G00810.1	N1(Deamidated)	3646.86	0.014692	0.406936
	RNVTDLIMNVGAGGGGGGAPVSAAAPAAAGGAAAAAPAKEEK	4	1	1	AT4G00810.1		3673.9	0.086	0.795373
AT5G20935.1	unknown protein; CONTAINS InterPro DOMAIN/s: Protein of unknown function DUF3148 (InterPro:IPR021495); Has 30201 Blast hits to 17322 proteins in 780 species: Archae - 12; Bacteria - 1396; Metazoa - 17338; Fungi - 3422; Plants - 5037; Viruses - 0; Other Eukaryotes - 2996 (source: NCBI BLink).	35.19	1	4	4	39
	Sequence	# PSMs	# Proteins	# Protein Groups	Protein Group Accessions	Modifications	MH+ [Da]	q-Value	PEP	pRS Score	pRS Probability	pRS Site Probabilities
	SKLQVGSPIIIVEAPK	20	1	1	AT5G20935.1		1679.01	0	2.44695e-05
	ANSGLVKPGDVGR	16	1	1	AT5G20935.1		1269.69	0	0.00255688
	TAASMPCLRANSGLVKPGDVGR	2	1	1	AT5G20935.1	S4(Phospho); C7(Carbamidomethyl)	2337.11	0.005144	0.0990051	8.38003	0.435712	T(1): 43.6; S(4): 43.6; S(12): 12.9
	TAASMPCLR	1	1	1	AT5G20935.1	M5(Oxidation); C7(Carbamidomethyl)	1022.47	0.021704	0.49101
AT2G47390.1	Prolyl oligopeptidase family protein	33.61	1	18	18	182
	Sequence	# PSMs	# Proteins	# Protein Groups	Protein Group Accessions	Modifications	MH+ [Da]	q-Value	PEP	pRS Score	pRS Probability	pRS Site Probabilities
	GSPNEFAGIGSTSALLWLAR	12	1	1	AT2G47390.1		2047.06	0	1.79763e-10
	QLCDLPLAEDIPIASNSVR	20	1	1	AT2G47390.1	C3(Carbamidomethyl)	2111.08	0	7.1369e-10
	YVEQLVASAEAAVEEVVR	12	1	1	AT2G47390.1		1962.01	0	4.41995e-09
	DIVYMQSAEPLAGEEPEVLHK	3	1	1	AT2G47390.1	M5(Oxidation)	2371.14	0	1.15036e-07
	TLTPFGFQNEDR	12	1	1	AT2G47390.1		1424.68	0	0.000114953
	DIVDAPPVPALSFSPHR	16	1	1	AT2G47390.1		1817.95	0	0.00266372
	IAVGGHSYGAFMTANLLAHAPHLFACGIAR	8	1	1	AT2G47390.1	C26(Carbamidomethyl)	3123.57	0	1.95713e-07
	LVVLPHESHGYSAR	8	1	1	AT2G47390.1		1564.82	0	0.00182829
	VQQITNFPHPYPQLASLQK	8	1	1	AT2G47390.1		2209.18	0	4.85606e-06
	MSFYTGLGIHQLLPDGTLSPEK	4	1	1	AT2G47390.1		2404.22	0	2.1673e-06
	DIVDAPPVPALSFSPHRDK	36	1	1	AT2G47390.1		2061.08	0	1.72111e-06
	YCVPNTSDADTSPDQSK	8	1	1	AT2G47390.1	C2(Carbamidomethyl)	1884.78	0	1.6004e-05
	GEPPKKPLVPSGPK	8	1	1	AT2G47390.1		1430.83	9.8e-05	0.00233565
	ESIMHVLWETDR	4	1	1	AT2G47390.1		1515.72	9.8e-05	0.00250137
	IKKPILLIHGEEDNNPGTLTMQSDR	8	1	1	AT2G47390.1		2819.46	0.000701	0.0227741
	ALPPLADLARPEEK	4	1	1	AT2G47390.1		1519.84	0.001023	0.0332871
	ENDEGTYVLLNGSGATPQGNVPFLDLFDINTGNK	10	1	1	AT2G47390.1	Q18(Deamidated); N33(Deamidated)	3611.72	0.001293	0.0451372
	KPLVPSGPKTLSNETKTVVQVR	1	1	1	AT2G47390.1	S6(Phospho)	2458.33	0.005144	0.100473	21.9061	0.585555	S(6): 58.6; T(10): 18.9; S(12): 18.9; T(15): 2.9; T(17): 0.8
AT2G20790.3	clathrin adaptor complexes medium subunit family protein	7.49	3	2	2	37
	Sequence	# PSMs	# Proteins	# Protein Groups	Protein Group Accessions	Modifications	MH+ [Da]	q-Value	PEP	pRS Score	pRS Probability	pRS Site Probabilities
	AKPVAAPVASSNPSGAAITGATASDAPK	20	3	1	AT2G20790.3		2507.31	0	5.53173e-10
	AKPVAAPVASSNPSGAAITGATASDAPKAGSR	17	3	1	AT2G20790.3	S10(Phospho); S31(Phospho)	3038.44	0.005145	0.152847	4.77613	0.0828199	S(10): 23.3; S(11): 23.3; S(14): 30.2; T(19): 23.9; T(22): 23.9; S(24): 22.9; S(31): 52.5
AT1G24510.1	TCP-1/cpn60 chaperonin family protein	26.92	3	9	9	47
	Sequence	# PSMs	# Proteins	# Protein Groups	Protein Group Accessions	Modifications	MH+ [Da]	q-Value	PEP	pRS Score	pRS Probability	pRS Site Probabilities
	QIEDAHIAILTCPFEPPKPK	12	2	1	AT1G24510.1	C12(Carbamidomethyl)	2304.2	0	0.000242467
	ALAFDEFGRPFIILR	9	2	1	AT1G24510.1	N-Term(Acetyl)	1806.99	0	0.00281302
	ENIPFYGIDCNDVGTNDMR	4	2	1	AT1G24510.1	C10(Carbamidomethyl)	2229.95	0	3.84671e-07
	AVLAVADLER	4	2	1	AT1G24510.1		1056.6	0	0.000800678
	TKHKVDIDTVEK	4	2	1	AT1G24510.1		1412.77	0	0.000929265
	KQEQQYFDEMVQK	4	2	1	AT1G24510.1		1700.8	0	0.000441036
	LRGIDAQKANIAAGK	5	1	1	AT1G24510.1		1525.88	0	0.0110838
	EQNVFETLIGK	4	2	1	AT1G24510.1		1277.68	0.000506	0.0155162
	AFAEALDSVPMALAENSGLQPIETLSAVK	1	2	1	AT1G24510.1	T24(Phospho)	3052.48	0.005996	0.188734	7.65565	0.50658	S(8): 16.4; S(17): 16.4; T(24): 50.7; S(26): 16.4
AT1G79420.1	Protein of unknown function (DUF620)	9.11	1	1	1	1
	Sequence	# PSMs	# Proteins	# Protein Groups	Protein Group Accessions	Modifications	MH+ [Da]	q-Value	PEP	pRS Score	pRS Probability	pRS Site Probabilities
	GQDLRLLLGVLGCPLAPISVVVSDLFPDDPLLGSFQIK	1	1	1	AT1G79420.1	C13(Carbamidomethyl); S34(Phospho)	4142.18	0.007277	0.176545	2.40884	0.288794	S(19): 28.9; S(23): 42.2; S(34): 28.9
AT3G20970.1	NFU domain protein 4	12.72	2	2	2	10
	Sequence	# PSMs	# Proteins	# Protein Groups	Protein Group Accessions	Modifications	MH+ [Da]	q-Value	PEP	pRS Score	pRS Probability	pRS Site Probabilities
	IRPAVQDDGGDIEYCGFDPESGIVK	4	1	1	AT3G20970.1	C15(Carbamidomethyl)	2737.27	0	7.56161e-05
	GIARLVTSLSR	6	2	1	AT3G20970.1	S8(Phospho)	1252.67	0.007601	0.232023	36.3313	0.840914	T(7): 8.0; S(8): 84.1; S(10): 8.0
AT4G18810.1	NAD(P)-binding Rossmann-fold superfamily protein	15.1	2	4	4	22
	Sequence	# PSMs	# Proteins	# Protein Groups	Protein Group Accessions	Modifications	MH+ [Da]	q-Value	PEP	pRS Score	pRS Probability	pRS Site Probabilities
	GIVSTTNNGGFTSVR	8	2	1	AT4G18810.1		1509.76	0	5.74706e-07
	DSGIPFAIVRPCALTEEPAGADLIFEQGDNITGK	2	2	1	AT4G18810.1	C12(Carbamidomethyl); Q27(Deamidated)	3602.77	0	2.07031e-08
	DSGIPFAIVRPCALTEEPAGADLIFEQGDNITGK	1	2	1	AT4G18810.1	C12(Carbamidomethyl); Q27(Deamidated); N30(Deamidated)	3603.77	0	9.63e-07
	LPFSSLRPVFR	4	2	1	AT4G18810.1		1318.76	0.00115	0.0306943
	MEVSSSLKLSSSLSPSIIKLQGSSSSIDIK	7	2	1	AT4G18810.1	S4(Phospho); S5(Phospho)	3268.58	0.087208	0.932963	11.8003	0.0151515	S(4): 16.7; S(5): 16.7; S(6): 16.7; S(10): 16.7; S(11): 16.7; S(12): 16.7; S(14): 16.7; S(16): 16.7; S(23): 16.7; S(24): 16.7; S(25): 16.7; S(26): 16.7
AT1G74920.1	aldehyde dehydrogenase 10A8	32.53	2	11	12	134
	Sequence	# PSMs	# Proteins	# Protein Groups	Protein Group Accessions	Modifications	MH+ [Da]	q-Value	PEP	pRS Score	pRS Probability	pRS Site Probabilities
	RIPIVNPATEEVIGDIPAATTEDVDVAVNAAR	40	1	1	AT1G74920.1		3316.73	0	2.14439e-12
	SEGATILHGGSRPEHLEK	4	2	1	AT1G74920.1		1917.97	0	1.27163e-05
	ELGEWGLDNYLSVK	8	2	1	AT1G74920.1		1622.8	0	3.64541e-06
	IPIVNPATEEVIGDIPAATTEDVDVAVNAAR	32	1	1	AT1G74920.1		3160.62	0	1.75059e-06
	VAPSLAAGCTAILKPSELASVTCLELADICR	4	2	1	AT1G74920.1	C9(Carbamidomethyl); C23(Carbamidomethyl); C30(Carbamidomethyl)	3286.7	0	2.88726e-05
	KRIPIVNPATEEVIGDIPAATTEDVDVAVNAAR	16	1	1	AT1G74920.1		3444.83	0	0.00239634
	EVGLPPGVLNVLTGFGSEAGAPLASHPGVDK	4	2	1	AT1G74920.1		2985.57	0	0.000219057
	RIPIVNPATEEVIGDIPAATTEDVDVAVNAAR	6	1	1	AT1G74920.1	N6(Deamidated)	3317.74	0	3.08328e-07
	KRIPIVNPATEEVIGDIPAATTEDVDVAVNAAR	2	1	1	AT1G74920.1	N7(Deamidated)	3445.83	0	2.91925e-05
	QLFIDGEWR	4	2	1	AT1G74920.1		1163.58	5.2e-05	0.000839652
	QKAPVSLPMESFK	8	2	1	AT1G74920.1		1461.78	0.000327	0.0115583
	RIPIVNPATEEVIGDIPAATTEDVDVAVNAARR	4	1	1	AT1G74920.1		3472.85	0.002942	0.0999435
	IPIVNPATEEVIGDIPAATTEDVDVAVNAARR	1	1	1	AT1G74920.1	N5(Deamidated); N28(Deamidated)	3318.73	0.003038	0.0850534
	SPLIVFDDVDLDK	1	3	2	AT1G74920.1;AT3G48170.1	S1(Phospho)	1555.73	0.009502	0.258415	69.9184	1	S(1): 100.0
AT3G48170.1	aldehyde dehydrogenase 10A9	14.51	1	3	4	17
	Sequence	# PSMs	# Proteins	# Protein Groups	Protein Group Accessions	Modifications	MH+ [Da]	q-Value	PEP	pRS Score	pRS Probability	pRS Site Probabilities
	TLPVVNPATEDIIGYIPAATSEDVELAVEAAR	8	1	1	AT3G48170.1		3324.71	0	0.000331751
	EEVFGPALCVK	4	1	1	AT3G48170.1	C9(Carbamidomethyl)	1248.62	0.000246	0.00449166
	NEGATVLCGGVRPEHLK	4	1	1	AT3G48170.1	C8(Carbamidomethyl)	1836.94	0.000914	0.0365103
	SPIIVFDDVDIDK	1	3	2	AT1G74920.1;AT3G48170.1	S1(Phospho)	1555.73	0.009502	0.258415	69.9184	1	S(1): 100.0
AT5G66130.1	RADIATION SENSITIVE 17	9.18	1	1	2	9
	Sequence	# PSMs	# Proteins	# Protein Groups	Protein Group Accessions	Modifications	MH+ [Da]	q-Value	PEP	pRS Score	pRS Probability	pRS Site Probabilities
	VVDFLHENVLDFVSDGAIEDAWCVSSYLADADLLLADIR	6	1	1	AT5G66130.1	S14(Phospho); C23(Carbamidomethyl)	4446.08	0.019092	0.50268	3.56105	0.347411	S(14): 34.7; S(25): 21.8; S(26): 21.8; Y(27): 21.8
	RMEDTQSSLERAGALK	3	1	1	AT5G66130.1	S7(Phospho)	1871.88	0.587944	1	36.3727	0.769322	T(5): 11.5; S(7): 76.9; S(8): 11.5
AT1G23170.1	Protein of unknown function DUF2359, transmembrane	14.06	2	1	3	6
	Sequence	# PSMs	# Proteins	# Protein Groups	Protein Group Accessions	Modifications	MH+ [Da]	q-Value	PEP	pRS Score	pRS Probability	pRS Site Probabilities
	SIATTAALLAATGFAGAAALSANPEAIAYLK	3	2	1	AT1G23170.1	T5(Phospho); S21(Phospho)	3079.5	0.010211	0.310008	0.665513	0.0538135	S(1): 41.3; T(4): 41.3; T(5): 34.0; T(12): 34.0; S(21): 26.1; Y(29): 23.1
	ARTILVNGAVR	1	3	2	AT1G70770.1;AT1G23170.1	T3(Phospho)	1249.68			42.0246	1	T(3): 100.0
	KPKVTLAEAAAKIDVSNLAAFLVEASIPLSHIPEAVYK	2	1	1	AT1G23170.1	S16(Phospho); S26(Phospho)	4164.17			0.692329	0.105886	T(5): 36.4; S(16): 38.9; S(26): 40.9; S(30): 41.8; Y(37): 41.8
AT4G11740.1	Ubiquitin-like superfamily protein	46.63	1	16	17	229
	Sequence	# PSMs	# Proteins	# Protein Groups	Protein Group Accessions	Modifications	MH+ [Da]	q-Value	PEP	pRS Score	pRS Probability	pRS Site Probabilities
	EQQDDEYVASLQADR	28	1	1	AT4G11740.1		1766.78	0	2.8041e-09
	LAAPSSPFDDDSDDVDEQPLVR	24	1	1	AT4G11740.1		2388.08	0	1.15023e-07
	EPQADEENAITLLIR	8	1	1	AT4G11740.1		1711.89	0	2.72714e-06
	ASTSEIGASAVTAAQGPQDTQALNGR	12	1	1	AT4G11740.1		2501.22	0	1.06634e-10
	LQTLFNFIDIAR	20	1	1	AT4G11740.1		1450.8	0	1.02867e-05
	QDRPAGSVANNNNQDYNDIEEEMIR	8	1	1	AT4G11740.1		2892.28	0	4.7915e-10
	SRQDRPAGSVANNNNQDYNDIEEEMIR	12	1	1	AT4G11740.1		3135.41	0	3.31377e-05
	HAFGDGESESTLNDLGLTSK	8	1	1	AT4G11740.1		2077.96	0	5.58744e-05
	TIGRPPFSLLDSDFAR	32	1	1	AT4G11740.1		1791.94	0	2.15423e-07
	SGSPEEEHASINPAER	16	1	1	AT4G11740.1		1709.77	0	0.000330149
	RVFDSDPLMPRPPFVSHPR	8	1	1	AT4G11740.1		2250.16	0	3.85138e-06
	ATPNQEAIDTFISITGASDAVALQK	8	1	1	AT4G11740.1	N-Term(Acetyl)	2603.31	0	0.000237262
	QDRPAGSVANNNNQDYNDIEEEMIR	7	1	1	AT4G11740.1	N11(Deamidated)	2893.28	0	8.56923e-09
	SRQDRPAGSVANNNNQDYNDIEEEMIR	1	1	1	AT4G11740.1	M25(Oxidation)	3151.4	0	1.90705e-08
	LEEHRGDLNQAVNAYFSEGDR	4	1	1	AT4G11740.1		2420.12	0	0.000432425
	LEEHRGDLNQAVNAYFSEGDRNVVR	8	1	1	AT4G11740.1		2888.39	0	0.000166711
	FLKSDKLQTLFNFIDIAR	12	1	1	AT4G11740.1		2169.2	0	8.92298e-06
	SRQDRPAGSVANNNNQDYNDIEEEMIR	7	1	1	AT4G11740.1	N12(Deamidated)	3136.41	0	0.00012394
	AQPRPPSPSLTAQR	3	1	1	AT4G11740.1	S9(Phospho)	1585.78	0.010558	0.233691	48.7919	0.906304	S(7): 8.4; S(9): 90.6; T(11): 1.0
	SQGYKASTSEIGASAVTAAQGPQDTQALNGR	2	1	1	AT4G11740.1	S1(Phospho); S7(Phospho); T25(Phospho)	3304.4	0.599669	1	11.4506	0.0582952	S(1): 49.8; Y(4): 49.8; S(7): 49.8; T(8): 24.6; S(9): 24.6; S(14): 33.8; T(17): 33.8; T(25): 33.8
	EPQADEENAITLLIR	1	1	1	AT4G11740.1	Q3(Deamidated); N8(Deamidated)	1713.85
AT5G01220.1	sulfoquinovosyldiacylglycerol 2	4.51	1	1	1	2
	Sequence	# PSMs	# Proteins	# Protein Groups	Protein Group Accessions	Modifications	MH+ [Da]	q-Value	PEP	pRS Score	pRS Probability	pRS Site Probabilities
	FKPDIIHASSPGVMVFGALAIAK	2	1	1	AT5G01220.1	S9(Phospho)	2449.27	0.011226	0.331174	7.79743	0.237332	S(9): 23.7; S(10): 76.3
AT5G09620.1	Octicosapeptide/Phox/Bem1p family protein	27.5	1	9	10	250
	Sequence	# PSMs	# Proteins	# Protein Groups	Protein Group Accessions	Modifications	MH+ [Da]	q-Value	PEP	pRS Score	pRS Probability	pRS Site Probabilities
	LFLFPSSPISGGFGSEGSTK	24	1	1	AT5G09620.1		2015.01	0	3.00907e-10
	YQLPGEDLDALISVTNDEDLEHMMHEYDR	28	1	1	AT5G09620.1		3448.52	0	2.35614e-07
	QIQEFQMIQIR	16	1	1	AT5G09620.1		1433.76	0	1.24391e-05
	IQPRPHDNQLTYVNGDTK	48	1	1	AT5G09620.1		2096.05	0	1.8725e-05
	SVTAPPNNADFLFGSEK	28	2	2	AT5G09620.1;AT5G64430.1		1793.87	0	1.65682e-06
	MLQPEHGVNPAEIQR	12	1	1	AT5G09620.1		1718.86	0	1.72248e-05
	QIQEFQMIQIR	5	1	1	AT5G09620.1	M7(Oxidation)	1449.75	0	2.64063e-05
	DTLNPIPSRPESEK	24	1	1	AT5G09620.1		1582.81	0	0.00119143
	YQLPGEDLDALISVTNDEDLEHMMHEYDR	10	1	1	AT5G09620.1	M24(Oxidation)	3464.52	0	1.75632e-05
	MLQPEHGVNPAEIQR	3	1	1	AT5G09620.1	M1(Oxidation)	1734.86	0	3.32031e-09
	LSAVCSGGGDGGEISFK	16	1	1	AT5G09620.1	C5(Carbamidomethyl)	1640.76	0	4.59097e-16
	MRLFLFPSSPISGGFGSEGSTK	12	1	1	AT5G09620.1		2302.15	0	1.17634e-06
	YQLPGEDLDALISVTNDEDLEHMMHEYDR	2	1	1	AT5G09620.1	M23(Oxidation); M24(Oxidation)	3480.5	0	2.32813e-05
	SDRDTLNPIPSRPESEK	16	1	1	AT5G09620.1		1940.96	9.8e-05	0.00190536
	LFLFPSSPISGGFGSEGSTK	6	1	1	AT5G09620.1	S15(Phospho)	2094.98	0.012299	0.256954	34.1354	0.00997813	S(6): 1.0; S(7): 1.0; S(10): 96.5; S(15): 1.0; S(18): 0.3; T(19): 0.3
AT1G62290.1	Saposin-like aspartyl protease family protein	9.55	1	1	2	10
	Sequence	# PSMs	# Proteins	# Protein Groups	Protein Group Accessions	Modifications	MH+ [Da]	q-Value	PEP	pRS Score	pRS Probability	pRS Site Probabilities
	SYNNNLGGDSGDADIVPLKNYLDAQYYGEIAIGTPPQK	1	1	1	AT1G62290.1	S1(Phospho); Y2(Phospho); S10(Phospho)	4310.87	0.013098	0.277507	1.56852	0.0277425	S(1): 29.8; Y(2): 29.8; S(10): 34.9; Y(21): 43.2; Y(26): 54.1; Y(27): 54.1; T(34): 54.1
	RNDGTFRVGLK	9	1	1	AT1G62290.1		1262.7
AT3G42850.1	Mevalonate/galactokinase family protein	2.7	1	1	1	126
	Sequence	# PSMs	# Proteins	# Protein Groups	Protein Group Accessions	Modifications	MH+ [Da]	q-Value	PEP	pRS Score	pRS Probability	pRS Site Probabilities
	HAEARHHSRDTPILEIVSFGSELSNR	126	1	1	AT3G42850.1	S8(Phospho)	3038.46	0.014648	0.405529	2.56829	0.273171	S(8): 27.3; T(11): 27.3; S(18): 15.1; S(21): 15.1; S(24): 15.1
AT2G48160.1	Tudor/PWWP/MBT domain-containing protein	2.86	1	1	1	2
	Sequence	# PSMs	# Proteins	# Protein Groups	Protein Group Accessions	Modifications	MH+ [Da]	q-Value	PEP	pRS Score	pRS Probability	pRS Site Probabilities
	SAEEGTLGSAENTTLMPQVIEIPTATSLTQMNSDPSHGR	2	1	1	AT2G48160.1	S36(Phospho)	4150.91	0.014702	0.406737	10.9249	0.39119	S(1): 3.2; T(6): 3.3; S(9): 3.6; T(13): 4.3; T(14): 3.6; T(24): 5.5; T(26): 5.5; S(27): 5.5; T(29): 5.5; S(33): 20.7; S(36): 39.1
AT3G28710.1	ATPase, V0/A0 complex, subunit C/D	9.97	3	1	2	16
	Sequence	# PSMs	# Proteins	# Protein Groups	Protein Group Accessions	Modifications	MH+ [Da]	q-Value	PEP	pRS Score	pRS Probability	pRS Site Probabilities
	YGSYLQNEPSPLHTTTIVEK	4	1	1	AT3G28710.1		2277.14	0	2.65448e-05
	AVNITINSIGTELTR	12	3	1	AT3G28710.1	S8(Phospho)	1681.86	0.015828	0.315547	36.7594	0.773004	T(5): 0.0; S(8): 77.3; T(11): 11.3; T(14): 11.3
AT3G09840.1	cell division cycle 48	59.7	2	31	33	353
	Sequence	# PSMs	# Proteins	# Protein Groups	Protein Group Accessions	Modifications	MH+ [Da]	q-Value	PEP	pRS Score	pRS Probability	pRS Site Probabilities
	SENPEAMEEDGVDEVSEIK	8	1	1	AT3G09840.1		2106.9	0	3.15256e-11
	IVSQLLTLMDGLK	12	3	1	AT3G09840.1		1430.83	0	1.09671e-07
	YTQGFSGADITEICQR	8	3	1	AT3G09840.1	C14(Carbamidomethyl)	1845.84	0	1.16776e-07
	VHILPVDDTVEGVTGNLFDAYLKPYFLEAYRPVR	28	2	1	AT3G09840.1		3907.03	0	1.49301e-12
	LDDVGYDDVGGVRK	12	1	1	AT3G09840.1		1507.73	0	6.50539e-06
	KYQAFAQTLQQSR	8	3	1	AT3G09840.1		1568.82	0	9.45432e-08
	YQAFAQTLQQSR	8	3	1	AT3G09840.1		1440.72	0	6.38755e-05
	VIETDPAEYCVVAPDTEIFCEGEPVKR	12	2	1	AT3G09840.1	C10(Carbamidomethyl); C20(Carbamidomethyl)	3123.46	0	5.37461e-07
	DFSTAILER	16	2	1	AT3G09840.1		1051.54	0	4.50253e-05
	NAPSIIFIDEIDSIAPK	16	3	1	AT3G09840.1		1842.98	0	8.16853e-07
	LVVDEAINDDNSVVSLHPATMEK	28	1	1	AT3G09840.1		2496.23	0	9.58833e-08
	QSAPCVLFFDELDSIATQR	20	3	1	AT3G09840.1	C5(Carbamidomethyl)	2197.06	0	1.79482e-08
	RIVSQLLTLMDGLK	4	3	1	AT3G09840.1		1586.93	0	1.42228e-05
	LVVDEAINDDNSVVSLHPATMEK	5	1	1	AT3G09840.1	M21(Oxidation)	2512.22	0	4.28775e-08
	KGDLFLVR	8	3	1	AT3G09840.1		947.567	0	0.000455663
	EIDIGVPDEIGR	8	3	1	AT3G09840.1		1312.67	0	0.00018333
	ISKDTHGYVGADLAALCTEAALQCIR	12	2	1	AT3G09840.1	C17(Carbamidomethyl); C24(Carbamidomethyl)	2833.4	0	9.6765e-05
	DTHGYVGADLAALCTEAALQCIR	4	3	1	AT3G09840.1	C14(Carbamidomethyl); C21(Carbamidomethyl)	2505.18	0	5.00141e-05
	LGDVISVHQCPDVK	8	3	1	AT3G09840.1	C10(Carbamidomethyl)	1566.79	0	1.11319e-05
	SKKDFSTAILER	20	1	1	AT3G09840.1		1394.76	0	0.00010603
	ELQETVQYPVEHPEK	16	3	1	AT3G09840.1		1825.89	0	2.25318e-05
	ETVVEVPNVSWNDIGGLENVKR	12	1	1	AT3G09840.1		2454.25	0	0.000378954
	MDVIDLEDDSIDAEILNSMAVTNEHFHTALGNSNPSALR	6	1	1	AT3G09840.1	N17(Deamidated); N23(Deamidated)	4256.98	0	3.48915e-09
	QSAPCVLFFDELDSIATQR	4	3	1	AT3G09840.1	Q1(Deamidated); C5(Carbamidomethyl)	2198.05	0	7.79021e-07
	EKMDVIDLEDDSIDAEILNSMAVTNEHFHTALGNSNPSALR	8	1	1	AT3G09840.1	N34(Deamidated)	4513.12	0	3.00031e-05
	AHVIVMGATNRPNSIDPALRR	4	3	1	AT3G09840.1		2288.24	0	0.00035072
	GPELLTMWFGESEANVR	1	3	1	AT3G09840.1	M7(Oxidation)	1951.92	0	0.00011193
	MDVIDLEDDSIDAEILNSMAVTNEHFHTALGNSNPSALR	4	1	1	AT3G09840.1	N32(Deamidated)	4256	0	3.91986e-08
	EKMDVIDLEDDSIDAEILNSMAVTNEHFHTALGNSNPSALR	6	1	1	AT3G09840.1	N34(Deamidated); N36(Deamidated)	4514.12	0	0.000189112
	VHILPVDDTVEGVTGNLFDAYLKPYFLEAYRPVR	1	2	1	AT3G09840.1	N16(Deamidated)	3908.05	0	1.48785e-09
	RKDTVCIALADETCEEPK	8	2	1	AT3G09840.1	C6(Carbamidomethyl); C14(Carbamidomethyl)	2135	0	1.23421e-05
	VRLGDVISVHQCPDVK	8	3	1	AT3G09840.1	C12(Carbamidomethyl)	1821.96	5.2e-05	0.00126774
	VLNQLLTEMDGMNAKK	4	3	1	AT3G09840.1		1804.93	5.2e-05	0.000744485
	ELVELPLRHPQLFK	12	3	1	AT3G09840.1		1719	5.2e-05	0.000965245
	DTHGYVGADLAALCTEAALQCIR	1	3	1	AT3G09840.1	C14(Carbamidomethyl); Q20(Deamidated); C21(Carbamidomethyl)	2506.18	5.9e-05	0.00117869
	NAPSIIFIDEIDSIAPKR	4	3	1	AT3G09840.1		1999.09	0.000143	0.00258298
	TVFIIGATNRPDIIDSALLRPGRLDQLIYIPLPDEDSR	3	2	1	AT3G09840.1	T8(Phospho); S16(Phospho); Y29(Phospho); S37(Phospho)	4583.18	0.016937	0.459422	1.57665	0.190439	T(1): 81.0; T(8): 72.3; S(16): 81.0; Y(29): 81.0; S(37): 84.9
	IVSQLLTLMDGLKSR	2	3	1	AT3G09840.1	T7(Phospho)	1753.93	0.69697	1	9.07954	0.586574	S(3): 20.7; T(7): 58.7; S(14): 20.7
	SIGVKPPK	4	3	1	AT3G09840.1		825.519
AT1G73610.1	GDSL-like Lipase/Acylhydrolase superfamily protein	15.99	1	1	2	13
	Sequence	# PSMs	# Proteins	# Protein Groups	Protein Group Accessions	Modifications	MH+ [Da]	q-Value	PEP	pRS Score	pRS Probability	pRS Site Probabilities
	SYETIAPQIIENIKAK	10	1	1	AT1G73610.1	S1(Phospho); T4(Phospho)	1977.93	0.017056	0.387084	30.0857	0.496665	S(1): 50.3; Y(2): 50.3; T(4): 99.3
	LNGVVGNQEQANAVISNAVYLISAGNNDIAITYFTTGAR	3	1	1	AT1G73610.1	Y20(Phospho); T36(Phospho)	4198.97			4.6373	0.0785694	S(16): 28.8; Y(20): 28.8; S(23): 28.8; T(32): 21.8; Y(33): 21.8; T(35): 35.0; T(36): 35.0
AT1G06530.1	Tropomyosin-related	16.1	1	4	4	33
	Sequence	# PSMs	# Proteins	# Protein Groups	Protein Group Accessions	Modifications	MH+ [Da]	q-Value	PEP	pRS Score	pRS Probability	pRS Site Probabilities
	IGDLESQNQELAR	8	1	1	AT1G06530.1		1472.73	0	0.00013753
	KVLEAIASR	12	1	1	AT1G06530.1		986.597	0	4.33444e-06
	IESLTAEIEELR	12	1	1	AT1G06530.1		1402.74	0	1.03391e-07
	TELQKWITEKMVVEDSLK	1	1	1	AT1G06530.1	S16(Phospho)	2257.11	0.019203	0.436242	22.8801	0.988635	T(1): 0.5; T(8): 0.6; S(16): 98.9
AT2G41110.1	calmodulin 2	85.91	6	6	18	513
	Sequence	# PSMs	# Proteins	# Protein Groups	Protein Group Accessions	Modifications	MH+ [Da]	q-Value	PEP	pRS Score	pRS Probability	pRS Site Probabilities
	EADVDGDGQINYEEFVK	144	10	2	AT1G66410.1;AT2G41110.1		1927.85	0	3.77399e-11
	VFDKDQNGFISAAELR	68	10	2	AT1G66410.1;AT2G41110.1		1809.91	0	1.74633e-07
	DQNGFISAAELR	16	10	2	AT1G66410.1;AT2G41110.1		1320.65	0	4.52934e-05
	MKDTDSEEELKEAFR	16	10	2	AT1G66410.1;AT2G41110.1		1827.84	0	1.73698e-07
	EAFSLFDKDGDGCITTK	48	5	2	AT1G66410.1;AT2G41110.1	C13(Carbamidomethyl)	1903.87	0	7.32499e-09
	SLGQNPTEAELQDMINEVDADGNGTIDFPEFLNLMAR	3	6	1	AT2G41110.1	M14(Oxidation); M35(Oxidation)	4096.86	0	6.19748e-08
	EAFSLFDK	40	9	2	AT1G66410.1;AT2G41110.1		956.472	0	0.000411741
	SLGQNPTEAELQDMINEVDADGNGTIDFPEFLNLMAR	8	6	1	AT2G41110.1	M35(Oxidation)	4080.87	0	5.0108e-06
	EAFRVFDKDQNGFISAAELR	28	10	2	AT1G66410.1;AT2G41110.1		2313.16	0	8.49998e-06
	MKDTDSEEELKEAFR	3	10	2	AT1G66410.1;AT2G41110.1	M1(Oxidation)	1843.83	0	1.45257e-07
	SLGQNPTEAELQDMINEVDADGNGTIDFPEFLNLMAR	8	6	1	AT2G41110.1		4064.87	0	1.24939e-05
	MKDTDSEEELK	28	10	2	AT1G66410.1;AT2G41110.1		1324.59	0	7.42452e-05
	DTDSEEELKEAFR	12	10	2	AT1G66410.1;AT2G41110.1		1568.71	0	0.00115865
	KMKDTDSEEELK	12	10	2	AT1G66410.1;AT2G41110.1		1452.69	0	0.00246284
	ADQLTDDQISEFK	10	5	1	AT2G41110.1	N-Term(Acetyl)	1551.71	0	0.000309357
	EADVDGDGQINYEEFVK	8	10	2	AT1G66410.1;AT2G41110.1	Q9(Deamidated)	1928.84	0	8.5825e-06
	VFDKDQNGFISAAELR	6	10	2	AT1G66410.1;AT2G41110.1	N7(Deamidated)	1810.9	0	4.08313e-05
	EADVDGDGQINYEEFVKVMMAK	2	6	1	AT2G41110.1	N11(Deamidated)	2489.13	0	0.000319438
	MKDTDSEEELK	1	10	2	AT1G66410.1;AT2G41110.1	M1(Oxidation)	1340.59	0	0.000242621
	ADQLTDDQISEFKEAFSLFDKDGDGCITTK	9	4	1	AT2G41110.1	N-Term(Acetyl); C26(Carbamidomethyl)	3436.57	0	3.38478e-09
	ADQLTDDQISEFKEAFSLFDK	7	5	1	AT2G41110.1	N-Term(Acetyl)	2489.16	0	2.02565e-06
	SLGQNPTEAELQDMINEVDADGNGTIDFPEFLNLMAR	4	6	1	AT2G41110.1	N33(Deamidated)	4065.89	0.000168	0.00257655
	SLGQNPTEAELQDMINEVDADGNGTIDFPEFLNLMARK	10	6	1	AT2G41110.1	Q4(Deamidated); N33(Deamidated)	4194.93	0.000564	0.00873462
	DTDSEEELK	12	10	2	AT1G66410.1;AT2G41110.1		1065.45	0.001219	0.0488332
	KMKDTDSEEELK	1	10	2	AT1G66410.1;AT2G41110.1	M2(Oxidation)	1468.68	0.003676	0.120693
	ELGTVMR	4	9	2	AT1G66410.1;AT2G41110.1	M6(Oxidation)	821.417	0.003709	0.088333
	ADQLTDDQISEFK	5	5	1	AT2G41110.1	T5(Phospho)	1589.66	0.019757	0.513722	49.8516	0.999902	T(5): 100.0; S(10): 0.0
AT1G70200.1	RNA-binding (RRM/RBD/RNP motifs) family protein	14.87	1	1	3	6
	Sequence	# PSMs	# Proteins	# Protein Groups	Protein Group Accessions	Modifications	MH+ [Da]	q-Value	PEP	pRS Score	pRS Probability	pRS Site Probabilities
	QFTGQSLAFGKVIKQIK	4	1	1	AT1G70200.1	S6(Phospho)	1973.05	0.02041	0.460705	39.544	0.5	T(3): 50.0; S(6): 50.0
	MNGASLCNSVLLHSHSLSRFQSSSSSCSVYLISSARTTSK	1	1	1	AT1G70200.1	C7(Carbamidomethyl); S9(Phospho); C27(Carbamidomethyl)	4427.05			1.08487e-13	0.0588235	S(5): 5.9; S(9): 5.9; S(14): 5.9; S(16): 5.9; S(18): 5.9; S(22): 5.9; S(23): 5.9; S(24): 5.9; S(25): 5.9; S(26): 5.9; S(28): 5.9; Y(30): 5.9; S(33): 5.9; S(34): 5.9; T(37): 5.9; T(38): 5.9; S(39): 5.9
	NHISSSIESSPIEMTRDSNTKLK	1	1	1	AT1G70200.1	N1(Deamidated)	2575.25
AT3G01280.1	voltage dependent anion channel 1	44.93	1	5	8	104
	Sequence	# PSMs	# Proteins	# Protein Groups	Protein Group Accessions	Modifications	MH+ [Da]	q-Value	PEP	pRS Score	pRS Probability	pRS Site Probabilities
	VGLALALKP	40	2	2	AT3G01280.1;AT5G15090.1		881.581	0	0.000304314
	VKGPGLYTEIGKK	20	2	2	AT3G01280.1;AT5G15090.1		1389.81	0	1.71539e-05
	FSITTFSPAGVAITSTGTK	12	1	1	AT3G01280.1		1885.99	0	2.43456e-05
	SFFTISGEVDTK	16	1	1	AT3G01280.1		1330.65	0	9.65464e-06
	DSTITVGTQHSLDPLTSVK	8	1	1	AT3G01280.1		1999.03	0	0.000159859
	INAGLSFTK	4	1	1	AT3G01280.1		950.53	0.00017	0.00344637
	EDLIASLTVNDKGDLLNASYYHIVNPLFNTAVGAEVSHK	3	1	1	AT3G01280.1	Y21(Phospho); T30(Phospho); S37(Phospho)	4468.05	0.023357	0.562417	0.595217	0.0301261	S(6): 44.2; T(8): 42.5; S(19): 42.2; Y(20): 42.2; Y(21): 42.2; T(30): 44.7; S(37): 42.2
	LSSKDSTITVGTQHSLDPLTSVK	1	1	1	AT3G01280.1	T20(Phospho); S21(Phospho)	2574.22			3.37515e-15	0.0277778	S(2): 22.2; S(3): 22.2; S(6): 22.2; T(7): 22.2; T(9): 22.2; T(12): 22.2; S(15): 22.2; T(20): 22.2; S(21): 22.2
AT2G22400.1	S-adenosyl-L-methionine-dependent methyltransferases superfamily protein	3.47	1	2	2	5
	Sequence	# PSMs	# Proteins	# Protein Groups	Protein Group Accessions	Modifications	MH+ [Da]	q-Value	PEP	pRS Score	pRS Probability	pRS Site Probabilities
	ESVVTVDAGVPDESAVEK	4	1	1	AT2G22400.1		1830.89	0	6.37791e-05
	EIRKNQTLER	1	1	1	AT2G22400.1	T7(Phospho)	1366.69	0.02499	0.523127	37.7585	1	T(7): 100.0
AT3G25860.1	2-oxoacid dehydrogenases acyltransferase family protein	47.08	1	13	16	301
	Sequence	# PSMs	# Proteins	# Protein Groups	Protein Group Accessions	Modifications	MH+ [Da]	q-Value	PEP	pRS Score	pRS Probability	pRS Site Probabilities
	VGYPVNTDALDALYEK	28	1	1	AT3G25860.1		1767.88	0	3.73474e-08
	ITASDVETAAGIAPSK	24	1	1	AT3G25860.1		1530.8	0	1.0192e-07
	IVYGADLAAFLQTFAK	32	1	1	AT3G25860.1		1727.93	0	2.42902e-09
	EIFMPALSSTMTEGK	1	2	2	AT1G34430.1;AT3G25860.1	M11(Oxidation)	1657.78	0	1.35069e-06
	AAGMALAQHPVVNASCKDGK	10	1	1	AT3G25860.1	M4(Oxidation); C16(Carbamidomethyl)	2040.99	0	1.34241e-08
	EIFMPALSSTMTEGK	16	2	2	AT1G34430.1;AT3G25860.1		1641.78	0	6.54946e-06
	NMIESLSVPTFR	24	1	1	AT3G25860.1		1393.71	0	0.000273865
	GVTMTALLAK	24	2	2	AT1G34430.1;AT3G25860.1		1004.58	0	7.367e-05
	SSIAPPPPPPPPVTAK	32	1	1	AT3G25860.1		1552.87	0	0.00134751
	AAGMALAQHPVVNASCK	4	1	1	AT3G25860.1	C16(Carbamidomethyl)	1724.85	0	0.000390284
	AAGMALAQHPVVNASCKDGK	16	1	1	AT3G25860.1	C16(Carbamidomethyl)	2025	0	1.26024e-05
	AAGMALAQHPVVNASCK	4	1	1	AT3G25860.1	M4(Oxidation); C16(Carbamidomethyl)	1740.85	0	1.10775e-05
	ATTTNLPPLLPDSSIVPFTAMQSAVSK	28	1	1	AT3G25860.1		2786.46	0	5.36544e-06
	VDIESVAGTGPFGR	8	1	1	AT3G25860.1		1404.71	0	0.000227015
	SSSSVAEAVVPSPPPVTSSPAPAIAQPAPVTAVSDGPRK	4	1	1	AT3G25860.1		3708.95	0	1.15445e-06
	SSSSVAEAVVPSPPPVTSSPAPAIAQPAPVTAVSDGPRK	1	1	1	AT3G25860.1	Q26(Deamidated)	3709.94	0	3.74586e-06
	ITASDVETAAGIAPSKSSIAPPPPPPPPVTAK	20	1	1	AT3G25860.1		3064.65	0	5.65794e-05
	NMIESLSVPTFR	4	1	1	AT3G25860.1	M2(Oxidation)	1409.71	0	0.00102929
	VKPKGVTMTALLAK	1	1	1	AT3G25860.1	M8(Oxidation)	1472.88	0	0.000251475
	QHKVDIESVAGTGPFGR	8	1	1	AT3G25860.1		1797.92	0	0.00447618
	VKPKGVTMTALLAK	8	1	1	AT3G25860.1		1456.89	0	6.10359e-05
	VDIESVAGTGPFGR	1	1	1	AT3G25860.1	T9(Phospho)	1484.67	0.027548	0.554734	11.8989	0.841367	S(5): 15.9; T(9): 84.1
	ATTTNLPPLLPDSSIVPFTAMQSAVSK	2	1	1	AT3G25860.1	N5(Deamidated)	2787.47	0.055383	0.643067
	MAVSSSSFLSTASLTNSK	1	1	1	AT3G25860.1	T11(Phospho)	1897.87			0	0.111111	S(4): 11.1; S(5): 11.1; S(6): 11.1; S(7): 11.1; S(10): 11.1; T(11): 11.1; S(13): 11.1; T(15): 11.1; S(17): 11.1
AT4G13350.1	NSP (nuclear shuttle protein)-interacting GTPase	13.29	1	3	6	43
	Sequence	# PSMs	# Proteins	# Protein Groups	Protein Group Accessions	Modifications	MH+ [Da]	q-Value	PEP	pRS Score	pRS Probability	pRS Site Probabilities
	EILGDSVIPLR	16	1	1	AT4G13350.1		1211.7	0	0.00354007
	SGTSLSSLMSTNEKPPEVK	12	1	1	AT4G13350.1		1992	0	0.000318764
	DLGSASPPVARPVR	8	1	1	AT4G13350.1		1421.78	0.000572	0.019537
	DLGSASPPVARPVR	4	1	1	AT4G13350.1	S6(Phospho)	1501.75	0.027763	0.601336	38.471	0.898375	S(4): 10.2; S(6): 89.8
	SPSETRSSSGSRSPPYEDGYDR	1	1	1	AT4G13350.1	S1(Phospho); S3(Phospho); S13(Phospho); Y20(Phospho)	2736.91	0.1744	1			Too many isoforms
	KTSEEGSQSPEQVK	1	1	1	AT4G13350.1	Q8(Deamidated)	1534.72	0.528	1
	TSEEGSQSPEQVKDLGSASPPVARPVREILGDSVIPLR	1	1	1	AT4G13350.1	T1(Phospho); S2(Phospho); S6(Phospho)	4241.01			1.56852	0.0325139	T(1): 43.8; S(2): 43.8; S(6): 43.8; S(8): 43.8; S(17): 44.8; S(19): 44.8; S(33): 35.0
AT3G01120.1	Pyridoxal phosphate (PLP)-dependent transferases superfamily protein	5.15	1	2	2	9
	Sequence	# PSMs	# Proteins	# Protein Groups	Protein Group Accessions	Modifications	MH+ [Da]	q-Value	PEP	pRS Score	pRS Probability	pRS Site Probabilities
	SVDEEVVVAEEGIR	8	1	1	AT3G01120.1		1530.76	0	3.70778e-07
	ALALGADLVVHSATK	1	1	1	AT3G01120.1	S12(Phospho); T14(Phospho)	1625.76	0.151899	1	12.7229	1	S(12): 100.0; T(14): 100.0
AT3G12580.1	heat shock protein 70	43.08	2	5	25	472
	Sequence	# PSMs	# Proteins	# Protein Groups	Protein Group Accessions	Modifications	MH+ [Da]	q-Value	PEP	pRS Score	pRS Probability	pRS Site Probabilities
	IINEPTAAAIAYGLDK	28	10	5	AT5G28540.1;AT5G42020.1;AT5G02500.1;AT3G09440.1;AT3G12580.1		1659.89	0	3.03968e-09
	IINEPTAAAIAYGLDKK	40	10	5	AT5G28540.1;AT5G42020.1;AT5G02500.1;AT3G09440.1;AT3G12580.1		1787.99	0	1.05145e-08
	TTPSYVAFTDSER	24	6	3	AT5G02500.1;AT3G09440.1;AT3G12580.1		1473.68	0	3.0019e-05
	NQVAMNPTNTVFDAK	1	1	1	AT3G12580.1	M5(Oxidation)	1665.79	0	1.20333e-08
	VQQLLQDFFNGK	24	5	2	AT5G02500.1;AT3G12580.1		1436.75	0	2.72331e-06
	NQVAMNPTNTVFDAK	12	1	1	AT3G12580.1		1649.79	0	4.49635e-07
	VEIIANDQGNRTTPSYVAFTDSER	16	6	3	AT5G02500.1;AT3G09440.1;AT3G12580.1		2683.29	0	1.37185e-06
	NALENYAYNMR	36	5	3	AT5G02500.1;AT3G09440.1;AT3G12580.1		1358.61	0	2.22444e-09
	ARFEELNMDLFRK	16	3	2	AT5G02500.1;AT3G12580.1		1668.85	0	1.88844e-06
	ATAGDTHLGGEDFDNR	28	7	3	AT5G02500.1;AT3G09440.1;AT3G12580.1		1675.73	0	3.59049e-07
	SINPDEAVAYGAAVQAAILSGEGNEK	20	4	2	AT3G09440.1;AT3G12580.1		2574.26	0	1.82843e-09
	ELESLCNPIIAR	12	1	1	AT3G12580.1	C6(Carbamidomethyl)	1414.73	0	0.000149608
	NAVVTVPAYFNDSQR	28	7	3	AT5G02500.1;AT3G09440.1;AT3G12580.1		1680.83	0	1.96193e-05
	FEELNMDLFR	8	3	2	AT5G02500.1;AT3G12580.1		1313.62	0	8.75135e-05
	NALENYAYNMR	11	5	3	AT5G02500.1;AT3G09440.1;AT3G12580.1	M10(Oxidation)	1374.61	0	0.000186631
	FEELNMDLFRK	20	3	2	AT5G02500.1;AT3G12580.1		1441.72	0	0.000708507
	MVNHFVQEFK	4	6	3	AT5G02500.1;AT3G09440.1;AT3G12580.1	M1(Oxidation)	1294.62	0	0.000656056
	MVNHFVQEFK	28	6	3	AT5G02500.1;AT3G09440.1;AT3G12580.1		1278.63	0	0.000444275
	DAGVISGLNVMR	28	1	1	AT3G12580.1		1231.64	0	0.000138979
	GEGPAIGIDLGTTYSCVGVWQHDR	28	6	3	AT5G02500.1;AT3G09440.1;AT3G12580.1	C16(Carbamidomethyl)	2588.24	0	6.49113e-07
	VVSGPGEKPMIVVNHKGEEK	4	1	1	AT3G12580.1		2134.12	0	0.000112064
	VEIIANDQGNR	12	6	3	AT5G02500.1;AT3G09440.1;AT3G12580.1		1228.63	0	2.33184e-05
	MVNHFVQEFKR	8	6	3	AT5G02500.1;AT3G09440.1;AT3G12580.1		1434.73	0	0.0002773
	ARFEELNMDLFR	8	3	2	AT5G02500.1;AT3G12580.1		1540.76	0	1.29193e-05
	AGKGEGPAIGIDLGTTYSCVGVWQHDR	1	4	2	AT3G09440.1;AT3G12580.1	N-Term(Acetyl); C19(Carbamidomethyl)	2886.38	0	2.1438e-11
	NKITITNDKGR	12	5	3	AT5G02500.1;AT3G09440.1;AT3G12580.1		1259.7	0	0.00290994
	MVNHFVQEFKR	2	6	3	AT5G02500.1;AT3G09440.1;AT3G12580.1	M1(Oxidation)	1450.73	5.2e-05	0.000891893
	VQQLLQDFFNGK	6	5	2	AT5G02500.1;AT3G12580.1	Q6(Deamidated)	1437.73	0.000793	0.0200223
	VQDLLLLDVTPLSLGLETAGGVMTVLIPRNTTIPTKK	1	1	1	AT3G12580.1	T10(Phospho); S13(Phospho); T35(Phospho)	4157.15	0.028558	0.631422	1.70735	0.0335659	T(10): 49.9; S(13): 49.9; T(18): 46.5; T(24): 38.4; T(31): 38.4; T(32): 38.4; T(35): 38.4
	NAVVTVPAYFNDSQR	4	7	3	AT5G02500.1;AT3G09440.1;AT3G12580.1	Q14(Deamidated)	1681.81	0.039973	0.620137
	MVNHFVQEFKRK	1	6	3	AT5G02500.1;AT3G09440.1;AT3G12580.1	N3(Deamidated); Q7(Deamidated)	1564.8	0.620369	1
	VQQLLQDFFNGK	1	5	2	AT5G02500.1;AT3G12580.1	Q2(Deamidated); Q3(Deamidated); Q6(Deamidated); N10(Deamidated)	1440.68
AT3G48770.1	DNA binding;ATP binding	1.9	1	1	1	1
	Sequence	# PSMs	# Proteins	# Protein Groups	Protein Group Accessions	Modifications	MH+ [Da]	q-Value	PEP	pRS Score	pRS Probability	pRS Site Probabilities
	LGHGNNSPGIYAFLPTEMVTNFPFIIQADFILASSR	1	1	1	AT3G48770.1	T16(Phospho)	4017.97	0.030701	0.646878	9.90632	0.144721	S(7): 14.5; Y(11): 56.7; T(16): 14.5; T(20): 4.8; S(34): 4.8; S(35): 4.8
AT4G33090.1	aminopeptidase M1	19.57	1	10	12	60
	Sequence	# PSMs	# Proteins	# Protein Groups	Protein Group Accessions	Modifications	MH+ [Da]	q-Value	PEP	pRS Score	pRS Probability	pRS Site Probabilities
	IKDGKLELEQSR	16	1	1	AT4G33090.1		1415.78	0	1.54969e-05
	EYFAVPYPLPK	4	1	1	AT4G33090.1		1323.7	0	0.00049391
	INVDQAGFYR	8	1	1	AT4G33090.1		1182.59	0	0.000269663
	ETALLYDEQHSAASNKQR	4	1	1	AT4G33090.1		2061	0	0.000591791
	SGYESLLR	4	1	1	AT4G33090.1		924.479	5.2e-05	0.000914632
	KEDNLTQLVAQLSSN	4	1	1	AT4G33090.1		1659.86	5.3e-05	0.00126598
	ILGSLASCPDPTIVQDVLNFVLSDEVR	4	1	1	AT4G33090.1	C8(Carbamidomethyl)	2957.53	0.000143	0.00268749
	EVEEFFATR	8	1	1	AT4G33090.1		1127.54	0.000338	0.00949402
	KNMAVTQFEPADARR	2	1	1	AT4G33090.1	N2(Deamidated)	1734.86	0.005985	0.178449
	LNPDLIACTFTGTVAIDLDIVADTR	4	1	1	AT4G33090.1	C8(Carbamidomethyl); T9(Phospho)	2784.35	0.030803	0.650107	18.9062	0.571291	T(9): 57.1; T(11): 20.8; T(13): 20.8; T(24): 1.4
	NMAVTQFEPADARR	1	1	1	AT4G33090.1	M2(Oxidation)	1621.77	0.079298	0.949576
	GEVLTALAVFGHDETLKEAVRR	1	1	1	AT4G33090.1	T15(Phospho)	2491.28	0.621844	1	0.148949	0.29907	T(5): 70.1; T(15): 29.9
AT5G61780.1	TUDOR-SN protein 2	27.41	1	10	20	165
	Sequence	# PSMs	# Proteins	# Protein Groups	Protein Group Accessions	Modifications	MH+ [Da]	q-Value	PEP	pRS Score	pRS Probability	pRS Site Probabilities
	DLGLELVENGLAK	8	3	2	AT5G61780.1;AT5G07350.1		1370.75	0	1.39509e-08
	TNAGTYLLEAGLAK	8	1	1	AT5G61780.1		1421.76	0	6.82136e-06
	INQISAVVEYVLSGHR	12	1	1	AT5G61780.1		1784.96	0	1.71268e-07
	GKPMEGIVEQVR	12	3	2	AT5G61780.1;AT5G07350.1		1342.71	0	5.1616e-05
	VKAVTSGDCLVITALTHNR	24	1	1	AT5G61780.1	C9(Carbamidomethyl)	2055.1	0	6.96057e-07
	TITLSSLMAPK	16	1	1	AT5G61780.1		1161.65	0	0.00366175
	EFGSVYLGNENLAK	8	1	1	AT5G61780.1		1540.76	0	0.000125615
	IPEAHILEMAER	4	1	1	AT5G61780.1		1408.72	0	7.28253e-05
	SNHYDALLAAEAR	24	3	2	AT5G61780.1;AT5G07350.1		1430.7	0	0.00508779
	RVCLSSIRSPK	8	3	2	AT5G61780.1;AT5G07350.1	C3(Carbamidomethyl)	1302.73	0	1.26414e-05
	VVVTEVLGGGR	4	3	2	AT5G61780.1;AT5G07350.1		1085.63	0	1.05581e-05
	INQISAVVEYVLSGHRFK	8	1	1	AT5G61780.1		2060.13	0	3.59577e-07
	RVCLSSIR	4	3	2	AT5G61780.1;AT5G07350.1	C3(Carbamidomethyl)	990.55	5.2e-05	0.00169792
	GKPMEGIVEQVR	2	3	2	AT5G61780.1;AT5G07350.1	M4(Oxidation)	1358.7	9.8e-05	0.00228732
	DAGEYLHTVTLESGK	4	1	1	AT5G61780.1		1619.79	9.8e-05	0.00167395
	VMDFGSVFLPSPTKGDTAVAAAATPGANIAELIISR	12	1	1	AT5G61780.1		3587.88	0.000143	0.00557532
	VMDFGSVFLPSPTKGDTAVAAAATPGANIAELIISR	1	1	1	AT5G61780.1	M2(Oxidation)	3603.88	0.004455	0.161363
	VVVTEVLGGGRFYVQTVGDQKVASIQNQLAALSLK	1	1	1	AT5G61780.1	T4(Phospho); S24(Phospho); S33(Phospho)	3927.94	0.030953	0.652373	10.1908	0.204105	T(4): 77.3; Y(13): 46.0; T(16): 46.0; S(24): 49.7; S(33): 81.0
	NLPPSAVGDSGNFDAMGLLAASKGKPMEGIVEQVRDGSTIR	1	1	1	AT5G61780.1	S5(Phospho); S10(Phospho); S22(Phospho)	4425	0.206559	1	0.143858	0.0841713	S(5): 61.9; S(10): 55.6; S(22): 57.2; S(38): 62.6; T(39): 62.6
	NSKTNAGTYLLEAGLAK	1	1	1	AT5G61780.1	S2(Phospho)	1830.89	0.55061	1	14.3479	0.157688	S(2): 15.8; T(4): 15.8; T(8): 52.7; Y(9): 15.8
	GDTAVAAAATPGANIAELIISR	2	1	1	AT5G61780.1	T3(Phospho); S21(Phospho)	2242.06			16.7526	0.91329	T(3): 94.8; T(10): 8.7; S(21): 96.5
	MATGAATENQWLKGR	1	1	1	AT5G61780.1	N9(Deamidated); Q10(Deamidated)	1635.78
AT5G42020.1	Heat shock protein 70 (Hsp 70) family protein	58.98	2	5	36	935
	Sequence	# PSMs	# Proteins	# Protein Groups	Protein Group Accessions	Modifications	MH+ [Da]	q-Value	PEP	pRS Score	pRS Probability	pRS Site Probabilities
	LGSVIGIDLGTTYSCVGVYK	32	3	2	AT5G28540.1;AT5G42020.1	C15(Carbamidomethyl)	2102.08	0	2.81175e-08
	LKEVEAVCNPIITAVYQR	48	3	2	AT5G28540.1;AT5G42020.1	C8(Carbamidomethyl)	2103.12	0	3.75056e-11
	IINEPTAAAIAYGLDK	28	10	5	AT5G28540.1;AT5G42020.1;AT5G02500.1;AT3G09440.1;AT3G12580.1		1659.89	0	3.03968e-09
	IINEPTAAAIAYGLDKK	40	10	5	AT5G28540.1;AT5G42020.1;AT5G02500.1;AT3G09440.1;AT3G12580.1		1787.99	0	1.05145e-08
	EPNKGVNPDEAVAYGAAVQGGILSGEGGDETK	12	3	2	AT5G28540.1;AT5G42020.1		3129.49	0	2.7391e-10
	EVEAVCNPIITAVYQR	44	3	2	AT5G28540.1;AT5G42020.1	C6(Carbamidomethyl)	1861.95	0	4.21444e-09
	DILLLDVAPLTLGIETVGGVMTK	7	3	2	AT5G28540.1;AT5G42020.1	M21(Oxidation)	2384.33	0	7.64475e-11
	VEIESLFDGVDLSEPLTR	36	2	1	AT5G42020.1		2019.02	0	1.36788e-10
	VFSPEEISAMILTK	68	3	2	AT5G28540.1;AT5G42020.1		1564.83	0	3.38081e-07
	DAGVIAGLNVAR	28	3	2	AT5G28540.1;AT5G42020.1		1155.65	0	1.90109e-05
	DILLLDVAPLTLGIETVGGVMTK	40	3	2	AT5G28540.1;AT5G42020.1		2368.34	0	9.67365e-12
	ITPSWVGFTDSER	24	3	2	AT5G28540.1;AT5G42020.1		1494.72	0	1.90537e-05
	SQIDEIVLVGGSTR	4	3	2	AT5G28540.1;AT5G42020.1		1473.79	0	7.30241e-06
	FDLTGVPPAPR	8	2	1	AT5G42020.1		1169.63	0	1.14815e-06
	MKETAEAYLGKK	8	3	2	AT5G28540.1;AT5G42020.1	M1(Oxidation)	1384.71	0	5.06558e-08
	MKETAEAYLGKK	32	3	2	AT5G28540.1;AT5G42020.1		1368.72	0	5.08674e-05
	IKDAVVTVPAYFNDAQR	44	3	2	AT5G28540.1;AT5G42020.1		1907	0	1.09082e-06
	VFSPEEISAMILTK	21	3	2	AT5G28540.1;AT5G42020.1	M10(Oxidation)	1580.82	0	8.34684e-06
	NALETYVYNMK	3	3	2	AT5G28540.1;AT5G42020.1	M10(Oxidation)	1361.64	0	0.000105502
	FEELNNDLFR	20	3	2	AT5G28540.1;AT5G42020.1		1296.62	0	0.00016396
	DFFEGKEPNKGVNPDEAVAYGAAVQGGILSGEGGDETK	16	3	2	AT5G28540.1;AT5G42020.1		3852.82	0	3.09262e-08
	KLVPYQIVNKDGKPYIQVK	40	3	2	AT5G28540.1;AT5G42020.1		2230.29	0	8.53122e-08
	NGHVEIIANDQGNR	36	3	2	AT5G28540.1;AT5G42020.1		1536.75	0	4.32818e-06
	ARFEELNNDLFRK	16	3	2	AT5G28540.1;AT5G42020.1		1651.85	0	5.70329e-05
	GRLSQEEIDR	24	2	2	AT5G28540.1;AT5G42020.1		1202.61	0	0.0029576
	KLVPYQIVNK	28	3	2	AT5G28540.1;AT5G42020.1		1201.73	0	0.00116083
	DAVVTVPAYFNDAQR	20	3	2	AT5G28540.1;AT5G42020.1		1665.82	0	0.000607884
	ARFEELNNDLFR	16	3	2	AT5G28540.1;AT5G42020.1		1523.76	0	9.77552e-06
	LLGKFDLTGVPPAPR	8	2	1	AT5G42020.1		1580.91	0	0.000324709
	FEELNNDLFRK	28	3	2	AT5G28540.1;AT5G42020.1		1424.71	0	0.000243695
	LVPYQIVNKDGKPYIQVK	24	3	2	AT5G28540.1;AT5G42020.1		2102.2	0	0.000711116
	DFFEGKEPNKGVNPDEAVAYGAAVQGGILSGEGGDETK	3	3	2	AT5G28540.1;AT5G42020.1	N9(Deamidated)	3853.83	0	0.000285025
	SGGAPGAGGESSTEEEDESHDEL	24	2	1	AT5G42020.1		2246.88	0	1.38266e-13
	NALETYVYNMK	20	3	2	AT5G28540.1;AT5G42020.1		1345.64	0	0.00120763
	MKETAEAYLGK	20	5	4	AT5G28540.1;AT5G42020.1;AT4G37910.1;AT5G09590.1		1240.62	0	5.45737e-05
	EALEWLDENQNSEK	16	3	2	AT5G28540.1;AT5G42020.1		1704.77	0	1.73509e-05
	MKETAEAYLGK	3	5	4	AT5G28540.1;AT5G42020.1;AT4G37910.1;AT5G09590.1	M1(Oxidation)	1256.62	0	0.000521304
	EAEEFAEEDKK	20	2	2	AT5G28540.1;AT5G42020.1		1324.59	9.8e-05	0.00195903
	LADKLEGDEK	4	3	2	AT5G28540.1;AT5G42020.1		1117.57	0.017498	0.404191
	ARSFGANSTVVLAIIFFGCLFAFSTAK	18	2	1	AT5G42020.1	S8(Phospho); C19(Carbamidomethyl); T25(Phospho)	3055.45	0.031338	0.655773	0	0.1	S(3): 40.0; S(8): 40.0; T(9): 40.0; S(24): 40.0; T(25): 40.0
	VQQLLKDFFEGKEPNK	1	3	2	AT5G28540.1;AT5G42020.1	Q2(Deamidated); Q3(Deamidated)	1921.99	0.247265	0.989492
	EEATKLGSVIGIDLGTTYSCVGVYKNGHVEIIANDQGNR	3	2	1	AT5G42020.1	T4(Phospho); T17(Phospho); S19(Phospho); C20(Carbamidomethyl); Y24(Phospho)	4497.98	0.601267	1	0	0.0285714	T(4): 57.1; S(8): 57.1; T(16): 57.1; T(17): 57.1; Y(18): 57.1; S(19): 57.1; Y(24): 57.1
AT4G30630.1	unknown protein; BEST Arabidopsis thaliana protein match is: unknown protein (TAIR:AT5G57910.1); Has 33 Blast hits to 33 proteins in 10 species: Archae - 0; Bacteria - 0; Metazoa - 0; Fungi - 0; Plants - 33; Viruses - 0; Other Eukaryotes - 0 (source: NCBI BLink).	7.59	1	1	1	1
	Sequence	# PSMs	# Proteins	# Protein Groups	Protein Group Accessions	Modifications	MH+ [Da]	q-Value	PEP	pRS Score	pRS Probability	pRS Site Probabilities
	LSESGGLEVPRKPSGERK	1	1	1	AT4G30630.1	S14(Phospho)	2006.01	0.031388	0.618337	31.8301	0.997179	S(2): 0.1; S(4): 0.2; S(14): 99.7
AT1G21650.3	Preprotein translocase SecA family protein	5.15	3	1	4	15
	Sequence	# PSMs	# Proteins	# Protein Groups	Protein Group Accessions	Modifications	MH+ [Da]	q-Value	PEP	pRS Score	pRS Probability	pRS Site Probabilities
	TGEGKTLVSTLAAYLNALTGEGVHVVTVNDYLAQR	7	3	1	AT1G21650.3	S9(Phospho); T10(Phospho); T19(Phospho); T27(Phospho)	3980.82	0.032771	0.676301	3.05533	0.0261386	T(1): 46.6; T(6): 49.2; S(9): 50.8; T(10): 51.3; Y(14): 50.2; T(19): 52.0; T(27): 52.4; Y(31): 47.5
	VMALIHIEGTEPVCVSGDGGGGIFVWSTTFPLEEQPLRK	6	1	1	AT1G21650.3	T10(Phospho); C14(Carbamidomethyl); S27(Phospho); T29(Phospho)	4467.03	0.158885	1	0.530348	0.0903091	T(10): 52.5; S(16): 57.7; S(27): 64.7; T(28): 62.5; T(29): 62.5
	KAKSVVTESLEK	1	3	1	AT1G21650.3	S9(Phospho)	1398.72	0.218351	1	53.8128	0.903848	S(4): 0.2; T(7): 9.4; S(9): 90.4
	KNSSLRR	1	3	1	AT1G21650.3		860.502
AT5G64090.1	FUNCTIONS IN: molecular_function unknown; INVOLVED IN: biological_process unknown; LOCATED IN: plasma membrane; EXPRESSED IN: 23 plant structures; EXPRESSED DURING: 13 growth stages; CONTAINS InterPro DOMAIN/s: Hyccin (InterPro:IPR018619); BEST Arabidopsis thaliana protein match is: unknown protein (TAIR:AT5G21050.1); Has 1807 Blast hits to 1807 proteins in 277 species: Archae - 0; Bacteria - 0; …	3.13	1	1	1	1
	Sequence	# PSMs	# Proteins	# Protein Groups	Protein Group Accessions	Modifications	MH+ [Da]	q-Value	PEP	pRS Score	pRS Probability	pRS Site Probabilities
	ASHDLNPQAILATR	1	1	1	AT5G64090.1	T13(Phospho)	1586.77	0.035	0.65823	56.9882	0.999998	S(2): 0.0; T(13): 100.0
AT4G26780.1	Co-chaperone GrpE family protein	43.12	1	10	11	152
	Sequence	# PSMs	# Proteins	# Protein Groups	Protein Group Accessions	Modifications	MH+ [Da]	q-Value	PEP	pRS Score	pRS Probability	pRS Site Probabilities
	LDTSEDSAGAAPLLK	20	1	1	AT4G26780.1		1487.76	0	7.32551e-07
	VIRPAEVGVTQGGENQEEKK	36	1	1	AT4G26780.1		2168.12	0	3.4698e-09
	VIRPAEVGVTQGGENQEEK	24	1	1	AT4G26780.1		2040.03	0	1.06525e-08
	SLLDVADNLGR	16	1	1	AT4G26780.1		1172.63	0	1.99844e-06
	KTHTEASKTSEEKPTAEANQPGLDSESK	12	1	1	AT4G26780.1		3000.44	0	0.00082906
	TSEEKPTAEANQPGLDSESK	8	1	1	AT4G26780.1		2117.98	0	5.22881e-06
	THTEASKTSEEKPTAEANQPGLDSESK	8	1	1	AT4G26780.1		2872.33	0	0.000281749
	TSEEKPTAEANQPGLDSESK	4	1	1	AT4G26780.1	Q12(Deamidated)	2118.98	0	0.000887788
	YDPINEPFDPNRHNAVFQVPDASKPEGTVAHVLK	1	1	1	AT4G26780.1	Q18(Deamidated)	3802.89	5.9e-05	0.00150283
	THTEASKTSEEKPTAEANQPGLDSESK	2	1	1	AT4G26780.1	N18(Deamidated)	2873.34	0.000225	0.00912923
	TYAEMENVMDR	1	1	1	AT4G26780.1	M5(Oxidation); M9(Oxidation)	1390.56	0.001573	0.0285302
	YDPINEPFDPNRHNAVFQVPDASKPEGTVAHVLK	8	1	1	AT4G26780.1		3801.89	0.002482	0.053475
	KTHTEASKTSEEKPTAEANQPGLDSESK	5	1	1	AT4G26780.1	N19(Deamidated)	3001.43	0.002564	0.0587521
	VIRPAEVGVTQGGENQEEKK	3	1	1	AT4G26780.1	Q16(Deamidated)	2169.13	0.006446	0.16817
	ASSVVKESFSKLDTSEDSAGAAPLLK	2	1	1	AT4G26780.1	S8(Phospho); S10(Phospho)	2797.3	0.035369	0.705773	17.1613	0.509273	S(2): 17.4; S(3): 17.4; S(8): 66.9; S(10): 66.9; T(14): 10.4; S(15): 10.4; S(18): 10.4
	TLLEGVEMTEK	2	1	1	AT4G26780.1	M8(Oxidation)	1265.63
AT5G11670.1	NADP-malic enzyme 2	35.37	1	12	12	167
	Sequence	# PSMs	# Proteins	# Protein Groups	Protein Group Accessions	Modifications	MH+ [Da]	q-Value	PEP	pRS Score	pRS Probability	pRS Site Probabilities
	FAESSMYSPVYR	5	1	1	AT5G11670.1	M6(Oxidation)	1452.65	0	2.60053e-07
	AIFGSGSPFDPVVYDGK	12	1	1	AT5G11670.1		1755.86	0	2.82949e-05
	TYLPGQANNCYIFPGLGLGLIMSGAIR	16	1	1	AT5G11670.1	C10(Carbamidomethyl)	2896.48	0	9.28562e-07
	TYDLGLASNLPR	24	1	1	AT5G11670.1		1319.69	0	3.02029e-05
	FAESSMYSPVYR	24	1	1	AT5G11670.1		1436.65	0	1.83942e-05
	DAHYLTGLLPPVILSQDVQER	32	1	1	AT5G11670.1		2364.26	0	2.51566e-06
	DLIGAVNAIKPTVLIGTSGVGQTFTK	8	1	1	AT5G11670.1		2600.47	0	2.31725e-05
	GSTPTDLPGEDVADNR	4	1	1	AT5G11670.1	N-Term(Acetyl)	1685.75	0	3.12563e-05
	YNKGLAFTDKER	8	2	1	AT5G11670.1		1441.74	0	2.48962e-05
	TYLPGQANNCYIFPGLGLGLIMSGAIR	3	1	1	AT5G11670.1	Q6(Deamidated); C10(Carbamidomethyl)	2897.48	0	0.00441598
	DAHYLTGLLPPVILSQDVQER	2	1	1	AT5G11670.1	Q16(Deamidated)	2365.24	0	0.00376591
	VRDDMLLAASEALAAQVTEEHYANGLIYPPFSNIR	8	1	1	AT5G11670.1	Q16(Deamidated)	3875.95	5.9e-05	0.000673297
	VRDDMLLAASEALAAQVTEEHYANGLIYPPFSNIR	12	1	1	AT5G11670.1		3874.92	0.000478	0.0127993
	LLIDNVEELLPVVYTPTVGEACQK	2	2	1	AT5G11670.1	N5(Deamidated); C22(Carbamidomethyl)	2701.41	0.001592	0.0322142
	YNKGLAFTDK	4	2	1	AT5G11670.1		1156.6	0.006575	0.215166
	LLIDNVEELLPVVYTPTVGEACQKYGSIFR	3	1	1	AT5G11670.1	Y14(Phospho); C22(Carbamidomethyl)	3503.75	0.038765	0.736579	11.8003	0.473391	Y(14): 47.3; T(15): 13.2; T(17): 13.2; Y(25): 13.2; S(27): 13.2
AT5G20700.1	Protein of unknown function (DUF581)	15.73	1	2	2	4
	Sequence	# PSMs	# Proteins	# Protein Groups	Protein Group Accessions	Modifications	MH+ [Da]	q-Value	PEP	pRS Score	pRS Probability	pRS Site Probabilities
	ISELLVGVNRSTAAPFFDVLMTSPKSPLDFK	3	1	1	AT5G20700.1	S2(Phospho); S11(Phospho)	3539.72	0.038956	0.75286	6.03099	0.155008	S(2): 42.6; S(11): 42.6; T(12): 42.6; T(22): 24.1; S(23): 24.1; S(26): 24.1
	STAAPFFDVLMTSPKSPLDFKILPQISQR	1	1	1	AT5G20700.1		3234.71	0.179311	1
AT5G35630.1	glutamine synthetase 2	71.4	1	29	33	992
	Sequence	# PSMs	# Proteins	# Protein Groups	Protein Group Accessions	Modifications	MH+ [Da]	q-Value	PEP	pRS Score	pRS Probability	pRS Site Probabilities
	VSGEVPWFGIEQEYTLLQQNVK	24	1	1	AT5G35630.1		2564.3	0	7.6252e-10
	WNYDGSSTGQAPGEDSEVILYPQAIFRDPFR	40	1	1	AT5G35630.1		3515.65	0	2.59709e-09
	GGNNILVICDTWTPAGEPIPTNK	24	1	1	AT5G35630.1	C9(Carbamidomethyl)	2467.22	0	1.8218e-09
	HETASIDQFSWGVANR	36	1	1	AT5G35630.1		1817.85	0	4.28964e-10
	IIAEYIWIGGSGIDLR	60	1	1	AT5G35630.1		1775.97	0	5.57575e-08
	RLTGKHETASIDQFSWGVANR	40	1	1	AT5G35630.1		2373.2	0	5.72173e-07
	ITEQAGVVLTLDPKPIEGDWNGAGCHTNYSTK	36	1	1	AT5G35630.1	C25(Carbamidomethyl)	3471.68	0	9.42775e-10
	LTGKHETASIDQFSWGVANR	36	1	1	AT5G35630.1		2217.1	0	4.94876e-08
	WPLGWPVGAFPGPQGPYYCGVGADKIWGR	16	1	1	AT5G35630.1	C19(Carbamidomethyl)	3188.56	0	3.42774e-07
	VETLLNLDTKPYSDR	72	1	1	AT5G35630.1		1763.91	0	1.998e-06
	RPASNMDPYIVTSLLAETTLLWEPTLEAEALAAQK	36	1	1	AT5G35630.1		3842.97	0	5.54489e-07
	GGNNILVICDTWTPAGEPIPTNKR	52	1	1	AT5G35630.1	C9(Carbamidomethyl)	2623.32	0	0.000140399
	WNYDGSSTGQAPGEDSEVILYPQAIFR	28	1	1	AT5G35630.1		3000.41	0	5.0472e-05
	KVSGEVPWFGIEQEYTLLQQNVK	16	1	1	AT5G35630.1		2692.4	0	5.77238e-06
	SMREEGGFEVIKK	6	1	1	AT5G35630.1	M2(Oxidation)	1525.77	0	2.81042e-07
	TIEKPVEDPSELPK	52	1	1	AT5G35630.1		1581.84	0	1.08357e-09
	KAILNLSLR	8	1	1	AT5G35630.1		1027.66	0	0.000290311
	SMREEGGFEVIKK	20	1	1	AT5G35630.1		1509.77	0	4.3245e-06
	AILNLSLR	28	1	1	AT5G35630.1		899.567	0	0.000562203
	HKEHISAYGEGNER	96	3	2	AT1G66200.1;AT5G35630.1		1626.76	0	7.31029e-07
	DPFRGGNNILVICDTWTPAGEPIPTNKR	44	1	1	AT5G35630.1	C13(Carbamidomethyl)	3138.58	0	1.10671e-05
	SRTIEKPVEDPSELPK	56	1	1	AT5G35630.1		1824.97	0	9.91949e-06
	RPASNMDPYIVTSLLAETTLLWEPTLEAEALAAQK	4	1	1	AT5G35630.1	M6(Oxidation)	3858.99	0	3.7092e-06
	GKGYLEDRRPASNMDPYIVTSLLAETTLLWEPTLEAEALAAQK	20	1	1	AT5G35630.1		4761.43	0	0.000254005
	RPASNMDPYIVTSLLAETTLLWEPTLEAEALAAQK	12	1	1	AT5G35630.1	N5(Deamidated)	3843.95	0	3.87972e-05
	ITEQAGVVLTLDPKPIEGDWNGAGCHTNYSTK	15	1	1	AT5G35630.1	N21(Deamidated); C25(Carbamidomethyl)	3472.68	0	1.85488e-07
	WPLGWPVGAFPGPQGPYYCGVGADK	1	1	1	AT5G35630.1	Q14(Deamidated); C19(Carbamidomethyl)	2677.27	0	0.000171883
	HKEHISAYGEGNERR	12	3	2	AT1G66200.1;AT5G35630.1		1782.86	0	2.53249e-11
	WPLGWPVGAFPGPQGPYYCGVGADK	4	1	1	AT5G35630.1	C19(Carbamidomethyl)	2676.27	0	0.000898719
	WPLGWPVGAFPGPQGPYYCGVGADKIWGR	1	1	1	AT5G35630.1	Q14(Deamidated); C19(Carbamidomethyl)	3189.55	0	3.60947e-08
	VETLLNLDTKPYSDR	1	1	1	AT5G35630.1	N6(Deamidated)	1764.91	0	5.24107e-06
	LTGKHETASIDQFSWGVANRGCSIR	12	1	1	AT5G35630.1	C22(Carbamidomethyl)	2790.36	0	3.91738e-06
	HETASIDQFSWGVANRGCSIR	8	1	1	AT5G35630.1	C18(Carbamidomethyl)	2391.12	0	0.00110284
	WNYDGSSTGQAPGEDSEVILYPQAIFRDPFR	3	1	1	AT5G35630.1	Q10(Deamidated)	3516.65	0	2.63737e-08
	LTGKHETASIDQFSWGVANRGCSIR	2	1	1	AT5G35630.1	N19(Deamidated); C22(Carbamidomethyl)	2791.36	0	0.000832872
	AKAAEIFSNKK	16	1	1	AT5G35630.1		1206.68	5.2e-05	0.000802214
	EEGGFEVIKK	24	1	1	AT5G35630.1		1135.6	0.000102	0.0124733
	GKGYLEDRRPASNMDPYIVTSLLAETTLLWEPTLEAEALAAQK	1	1	1	AT5G35630.1	N13(Deamidated); Q42(Deamidated)	4763.42	0.000168	0.00284196
	GKGYLEDRRPASNMDPYIVTSLLAETTLLWEPTLEAEALAAQK	3	1	1	AT5G35630.1	N13(Deamidated)	4762.44	0.000225	0.00189517
	GKGYLEDR	4	1	1	AT5G35630.1		937.471	0.000529	0.0177666
	GKGYLEDRRPASNMDPYIVTSLLAETTLLWEPTLEAEALAAQK	2	1	1	AT5G35630.1	M14(Oxidation)	4777.42	0.000673	0.0217275
	RPASNMDPYIVTSLLAETTLLWEPTLEAEALAAQK	1	1	1	AT5G35630.1	N5(Deamidated); Q34(Deamidated)	3844.97	0.00077	0.0159795
	EHISAYGEGNERR	12	3	2	AT1G66200.1;AT5G35630.1		1517.71	0.000835	0.0266575
	EHISAYGEGNER	4	3	2	AT1G66200.1;AT5G35630.1		1361.61	0.00203	0.0556407
	RPASNMDPYIVTSLLAETTLLWEPTLEAEALAAQKLSLNV	2	1	1	AT5G35630.1	N5(Deamidated); Q34(Deamidated)	4371.3	0.011866	0.340777
	SKSRTIEKPVEDPSELPK	2	1	1	AT5G35630.1	T5(Phospho); S14(Phospho)	2200.03	0.04041	0.750293	3.74558	0.166667	S(1): 50.0; S(3): 50.0; T(5): 50.0; S(14): 50.0
AT1G80380.3	P-loop containing nucleoside triphosphate hydrolases superfamily protein	45.05	4	13	14	136
	Sequence	# PSMs	# Proteins	# Protein Groups	Protein Group Accessions	Modifications	MH+ [Da]	q-Value	PEP	pRS Score	pRS Probability	pRS Site Probabilities
	LSVETLEALSK	20	3	1	AT1G80380.3		1189.67	0	1.24121e-05
	AYLPTLYAEGPSGSDPDR	12	4	1	AT1G80380.3		1908.89	0	6.97572e-07
	TTLVFALDYLFK	12	3	1	AT1G80380.3		1430.79	0	1.79445e-05
	SATISVDDFYLTAEGQAELR	8	3	1	AT1G80380.3		2186.05	0	0.000127628
	AYLPTLYAEGPSGSDPDRVLAIDIDEER	12	4	1	AT1G80380.3		3062.49	0	3.44705e-07
	KKNPGNALLEYR	20	3	1	AT1G80380.3		1402.78	0	1.31722e-06
	VLAIDIDEER	8	4	1	AT1G80380.3		1172.62	0	4.13237e-05
	FKDGDDVPPLVIGFSAPQGCGK	8	3	1	AT1G80380.3	C20(Carbamidomethyl)	2304.13	0	5.25498e-05
	VGQSIDKWLLYGSQLCR	4	4	1	AT1G80380.3	C16(Carbamidomethyl)	2023.04	0	0.000542089
	LYHYYIPVFIWCEDQIALHNSK	16	4	1	AT1G80380.3	C12(Carbamidomethyl)	2809.38	0	0.000112085
	LFQLNELK	8	4	1	AT1G80380.3		1004.58	5.3e-05	0.0012954
	LSVETLEALSKLTK	4	3	1	AT1G80380.3		1531.89	0.000186	0.00697913
	GNAGSHDLKLSVETLEALSKLTK	1	3	1	AT1G80380.3	T22(Phospho)	2491.28	0.043032	0.788797	35.5102	0.900785	S(5): 0.2; S(11): 0.1; T(14): 0.2; S(19): 9.4; T(22): 90.1
	WLLYGSQLCRLFQLNELK	3	4	1	AT1G80380.3	C9(Carbamidomethyl); Q13(Deamidated); N15(Deamidated)	2283.18
AT4G28910.2	novel interactor of JAZ	16.71	1	1	2	25
	Sequence	# PSMs	# Proteins	# Protein Groups	Protein Group Accessions	Modifications	MH+ [Da]	q-Value	PEP	pRS Score	pRS Probability	pRS Site Probabilities
	ASHVSTATDEGSTAENEDVAESEVGGGSSSNHAK	24	1	1	AT4G28910.2		3317.42	0	1.17357e-07
	SDSGQQPPQNFFNDLSKAPTTEAEASTKPLWVEDESR	1	1	1	AT4G28910.2	T27(Phospho); S36(Phospho)	4266.85	0.044161	0.731434	1.49471e-14	0.0357143	S(1): 25.0; S(3): 25.0; S(16): 25.0; T(20): 25.0; T(21): 25.0; S(26): 25.0; T(27): 25.0; S(36): 25.0
AT3G48750.1	cell division control 2	10.88	1	2	2	21
	Sequence	# PSMs	# Proteins	# Protein Groups	Protein Group Accessions	Modifications	MH+ [Da]	q-Value	PEP	pRS Score	pRS Probability	pRS Site Probabilities
	DKVTNETIALKK	20	1	1	AT3G48750.1		1359.78	0	1.31519e-05
	TNSLKLADFGLARAFGIPVR	1	1	1	AT3G48750.1	T1(Phospho)	2226.18	0.045148	0.610872	16.4239	0.5	T(1): 50.0; S(3): 50.0
AT2G24520.1	H(+)-ATPase 5	6.98	1	1	4	36
	Sequence	# PSMs	# Proteins	# Protein Groups	Protein Group Accessions	Modifications	MH+ [Da]	q-Value	PEP	pRS Score	pRS Probability	pRS Site Probabilities
	ALNLGVNVK	20	5	4	AT5G62670.1;AT2G18960.1;AT4G30190.1;AT2G24520.1		927.562	0	0.0044128
	MITGDQLAIGK	12	9	4	AT5G62670.1;AT2G18960.1;AT4G30190.1;AT2G24520.1		1146.62	0	0.000230744
	LGMGTNMYPSSALLGQVKDSSLGALPVDELIEK	2	1	1	AT2G24520.1	S10(Phospho)	3513.72	0.046113	0.748056	5.98523	0.2763	T(5): 11.2; Y(8): 11.2; S(10): 27.6; S(11): 27.6; S(20): 11.2; S(21): 11.2
	LGMGTNMYPSSALLGQVKDSSLGALPVDELIEKADGFAGVFPEHK	2	1	1	AT2G24520.1	S20(Phospho); S21(Phospho)	4849.28	0.207179	1	9.64327e-14	0.0666667	T(5): 33.3; Y(8): 33.3; S(10): 33.3; S(11): 33.3; S(20): 33.3; S(21): 33.3
AT1G51910.1	Leucine-rich repeat protein kinase family protein	4.79	1	1	2	3
	Sequence	# PSMs	# Proteins	# Protein Groups	Protein Group Accessions	Modifications	MH+ [Da]	q-Value	PEP	pRS Score	pRS Probability	pRS Site Probabilities
	SGHVLSWENRMQIAMEAAQGLEYLHNGSRPPMVHR	2	1	1	AT1G51910.1	S1(Phospho)	4081.92	0.049239	0.813592	1.76486	0.300109	S(1): 30.0; S(6): 30.0; Y(23): 20.0; S(28): 20.0
	LQVCLVK	1	1	1	AT1G51910.1	C4(Carbamidomethyl)	859.503
AT4G34740.1	GLN phosphoribosyl pyrophosphate amidotransferase 2	6.06	1	1	1	4
	Sequence	# PSMs	# Proteins	# Protein Groups	Protein Group Accessions	Modifications	MH+ [Da]	q-Value	PEP	pRS Score	pRS Probability	pRS Site Probabilities
	MAATSSISSSLSLNAKPNKLSNNNNNNKPHRFLR	4	1	1	AT4G34740.1	S5(Phospho); S6(Phospho); S8(Phospho)	3965.82	0.049336	0.814605	5.45169	0.0374748	T(4): 49.2; S(5): 49.2; S(6): 49.2; S(8): 30.5; S(9): 30.5; S(10): 30.5; S(12): 30.5; S(21): 30.5
AT1G74040.1	2-isopropylmalate synthase 1	14.26	1	1	4	11
	Sequence	# PSMs	# Proteins	# Protein Groups	Protein Group Accessions	Modifications	MH+ [Da]	q-Value	PEP	pRS Score	pRS Probability	pRS Site Probabilities
	AGNASLEEVVMAIK	4	2	2	AT1G74040.1;AT1G18500.1		1431.75	0	6.31435e-06
	LGVDIIEAGFPAASK	4	2	2	AT1G74040.1;AT1G18500.1		1487.81	0	0.000283748
	TIAETVGNTVDENGYVPVICGLSR	2	2	2	AT1G74040.1;AT1G18500.1	N13(Deamidated); C20(Carbamidomethyl)	2565.26	5.9e-05	0.000879685
	ESSILKSPNLSSPSFGVPSIPALSSSSTSPFSSLHLR	1	1	1	AT1G74040.1	S26(Phospho); S27(Phospho); T28(Phospho); S29(Phospho)	4120.83	0.04948	0.815127			Too many isoforms

## Sheet: PAPE (40 % AS+MOAC)
Accession	Description	ΣCoverage	Σ# Proteins	Σ# Unique Peptides	Σ# Peptides	Σ# PSMs	MH+ [Da]	q-Value	PEP	pRS Score	pRS Probability	pRS Site Probabilities
AT5G52310.1	low-temperature-responsive protein 78 (LTI78) / desiccation-responsive protein 29A (RD29A)	98.59	1	109	110	4566
	Sequence	# PSMs	# Proteins	# Protein Groups	Protein Group Accessions	Modifications	MH+ [Da]	q-Value	PEP	pRS Score	pRS Probability	pRS Site Probabilities
	VTDPTKEETGGVPEIAESFGNMEVTDESPDQKPGQFER	32	1	1	AT5G52310.1		4150.88	0	1.07033e-10
	NSPMGFGSESGAELEK	20	1	1	AT5G52310.1		1639.72	0	3.56049e-10
	HGQSNEHEQDHDLVEEDDDDDELEPEVIDAPGVTGKPR	108	1	1	AT5G52310.1		4265.86	0	9.66708e-17
	NEYSPESDGGLGAPLGGNFPVR	32	1	1	AT5G52310.1		2233.04	0	3.24478e-07
	DQETESAVTTKLPISGGGSGVEEQR	68	1	1	AT5G52310.1		2575.24	0	2.60816e-12
	ISTEKAASEEGEAVEEEVK	60	1	1	AT5G52310.1		2034.97	0	1.55943e-09
	LPISGGGSGVEEQR	24	1	1	AT5G52310.1		1385.7	0	7.34052e-08
	EETGGVPEIAESFGNMEVTDESPDQKPGQFER	28	1	1	AT5G52310.1		3509.56	0	2.51153e-07
	DQETESAVTTKLPISGGGSGVEEQRGEDK	56	1	1	AT5G52310.1		3004.43	0	1.59316e-06
	IKGWFGGGATDEVKPESPHSVEEAPK	92	1	1	AT5G52310.1		2752.35	0	1.1587e-07
	TESGNDKNSPMGFGSESGAELEK	44	1	1	AT5G52310.1		2371.03	0	2.32865e-12
	AASEEGEAVEEEVK	28	1	1	AT5G52310.1		1476.67	0	1.87488e-06
	NSPMGFGSESGAELEK	6	1	1	AT5G52310.1	M4(Oxidation)	1655.72	0	1.37798e-08
	FASMLGYSGEIPVGDQTQVAGTVDEKLTPVNEK	10	1	1	AT5G52310.1	M4(Oxidation)	3496.71	0	1.92027e-08
	FASMLGYSGEIPVGDQTQVAGTVDEK	28	1	1	AT5G52310.1		2699.28	0	4.73689e-07
	DYVAEKLTTEEEDK	36	1	1	AT5G52310.1		1669.78	0	6.28563e-08
	SSGWFGGGATEEVKPK	44	1	1	AT5G52310.1		1636.79	0	3.82746e-08
	LTPVNEKDQETESAVTTKLPISGGGSGVEEQR	80	1	1	AT5G52310.1		3356.67	0	6.40297e-05
	SKEFKEFDQDFDSVLGK	88	1	1	AT5G52310.1		2018.97	0	3.93429e-09
	DSPAKFPGESGVVFPVGFGDESGAELEK	72	1	1	AT5G52310.1		2852.36	0	0.00107777
	SHEFDLKTESGNDKNSPMGFGSESGAELEK	40	1	1	AT5G52310.1		3227.43	0	1.33438e-10
	TESGNDKNSPMGFGSESGAELEK	17	1	1	AT5G52310.1	M11(Oxidation)	2387.03	0	3.08112e-11
	VFPVVSSDYTKPTESVPVQEASYGHDAPAHSVR	56	1	1	AT5G52310.1		3556.73	0	5.46859e-07
	EFDQDFDSVLGK	24	1	1	AT5G52310.1		1399.64	0	4.34759e-06
	SHEFDLKTESGNDKNSPMGFGSESGAELEK	17	1	1	AT5G52310.1	M18(Oxidation)	3243.44	0	3.79814e-08
	FASMLGYSGEIPVGDQTQVAGTVDEKLTPVNEK	28	1	1	AT5G52310.1		3480.72	0	2.86442e-10
	SHELDLKNESDIDKDVPTGFDGEPDFLAK	64	1	1	AT5G52310.1		3231.53	0	6.53001e-09
	VNVETPITLEEESAVSDYLSGVSNYQSKVTDPTK	36	1	1	AT5G52310.1		3699.81	0	4.98478e-05
	QSTYTEKFASMLGYSGEIPVGDQTQVAGTVDEK	36	1	1	AT5G52310.1		3536.67	0	3.02481e-06
	ETTTKEVEKISTEK	44	1	1	AT5G52310.1		1622.85	0	0.000306021
	ISTEKAASEEGEAVEEEVKGGGGMVGR	16	1	1	AT5G52310.1		2706.27	0	3.69909e-08
	SHDFDMKTETGMDTNSPSR	8	1	1	AT5G52310.1		2155.9	0	6.08018e-09
	ETNVPASEEIIPPGTK	88	1	1	AT5G52310.1		1681.86	0	1.71475e-06
	DFPTRSHDFDMKTETGMDTNSPSR	28	1	1	AT5G52310.1		2772.2	0	8.01079e-08
	TETGMDTNSPSRSHEFDLK	28	1	1	AT5G52310.1		2151.96	0	3.17366e-06
	EFDQDFDSVLGKDSPAKFPGESGVVFPVGFGDESGAELEK	52	1	1	AT5G52310.1		4232.97	0	1.6019e-05
	TETGMDTNSPSR	16	1	1	AT5G52310.1		1295.55	0	3.62519e-05
	NESDIDKDVPTGFDGEPDFLAK	64	1	1	AT5G52310.1		2409.1	0	3.35106e-05
	ISTEKAASEEGEAVEEEVKGGGGMVGR	13	1	1	AT5G52310.1	M24(Oxidation)	2722.28	0	1.81295e-09
	ETHHESLNTPVSLLSGTEDVTSTFAPSGDDEYLDGQR	72	1	1	AT5G52310.1		4004.82	0	5.03427e-07
	SHELDLKNESDIDK	28	1	1	AT5G52310.1		1642.79	0	0.000533248
	TETLDQFSPELSHPK	60	1	1	AT5G52310.1		1728.84	0	2.4105e-05
	GRPGYGEASEEDKFPAR	80	1	1	AT5G52310.1		1865.88	0	3.02297e-06
	KVNVETPITLEEESAVSDYLSGVSNYQSKVTDPTK	24	1	1	AT5G52310.1		3827.9	0	9.74684e-06
	DYVAEKLTTEEEDKAFSDMVAEK	8	1	1	AT5G52310.1		2648.22	0	3.54625e-09
	DVPTGFDGEPDFLAK	44	1	1	AT5G52310.1		1607.75	0	8.70297e-05
	GWFGGGATDEVKPESPHSVEEAPK	12	1	1	AT5G52310.1		2511.17	0	1.76426e-07
	TETLDQFSPELSHPKER	116	1	1	AT5G52310.1		2013.99	0	6.20012e-09
	DSPAKFPGESGVVFPVGFGDESGAELEKDFPTR	40	1	1	AT5G52310.1		3468.66	0	1.63546e-07
	VNVETPITLEEESAVSDYLSGVSNYQSK	36	1	1	AT5G52310.1		3058.46	0	1.47761e-05
	EFDQKNDSGRNEYSPESDGGLGAPLGGNFPVR	80	1	1	AT5G52310.1		3409.57	0	1.01632e-06
	AASEEGEAVEEEVKGGGGMVGR	20	1	1	AT5G52310.1		2147.98	0	2.01025e-07
	SDDVEVETELGRDPK	60	1	1	AT5G52310.1		1688.8	0	1.15858e-05
	GRPGYGEASEEDKFPARSDDVEVETELGR	32	1	1	AT5G52310.1		3195.48	0	2.11904e-07
	DEFKESRDDFEETR	72	1	1	AT5G52310.1		1802.78	0	0.00223027
	SDDVEVETELGR	16	1	1	AT5G52310.1		1348.62	0	4.29895e-06
	RDVPIHHPLSELSDR	80	1	1	AT5G52310.1		1770.92	0	0.00164068
	QSTYTEKFASMLGYSGEIPVGDQTQVAGTVDEKLTPVNEK	8	1	1	AT5G52310.1		4318.1	0	0.00012665
	SHDFDMKTETGMDTNSPSR	11	1	1	AT5G52310.1	M6(Oxidation)	2171.89	0	2.36408e-05
	SVSGRDYVAEKLTTEEEDK	28	1	1	AT5G52310.1		2156.03	0	2.11814e-06
	NDSGRNEYSPESDGGLGAPLGGNFPVR	20	1	1	AT5G52310.1		2762.26	0	7.00592e-08
	KVNVETPITLEEESAVSDYLSGVSNYQSK	36	1	1	AT5G52310.1		3186.56	0	0.000128613
	TETLDQFSPELSHPKERDEFK	72	1	1	AT5G52310.1		2533.22	0	0.000435488
	NSLTKHGQSNEHEQDHDLVEEDDDDDELEPEVIDAPGVTGKPR	64	1	1	AT5G52310.1		4809.16	0	2.98139e-11
	DVPIHHPLSELSDREESR	44	1	1	AT5G52310.1		2116.04	0	0.000130866
	TEEPKQSTYTEK	36	1	1	AT5G52310.1		1440.68	0	0.000108793
	TETGMDTNSPSRSHEFDLK	17	1	1	AT5G52310.1	M5(Oxidation)	2167.95	0	2.19566e-05
	DEKTEEPKQSTYTEK	32	1	1	AT5G52310.1		1812.85	0	8.49759e-05
	AASEEGEAVEEEVKGGGGMVGRIK	12	1	1	AT5G52310.1		2389.16	0	8.4129e-05
	AFSDMVAEKLQIGGEEEK	28	1	1	AT5G52310.1		1980.96	0	1.19112e-07
	SSGWFGGGATEEVKPKSPHSVEESPQSLGSTVVPVQK	60	1	1	AT5G52310.1		3809.9	0	3.95326e-06
	ESRDDFEETR	20	1	1	AT5G52310.1		1283.55	0	0.000139788
	FPGESGVVFPVGFGDESGAELEK	24	1	1	AT5G52310.1		2354.12	0	0.000172474
	DFPTRSHDFDMKTETGMDTNSPSR	18	1	1	AT5G52310.1	M11(Oxidation)	2788.18	0	2.77673e-05
	SPHSVEESPQSLGSTVVPVQKEL	36	1	1	AT5G52310.1		2434.25	0	0.00406121
	AASEEGEAVEEEVKGGGGMVGR	9	1	1	AT5G52310.1	M19(Oxidation)	2163.98	0	8.0794e-06
	TESGNDKNSPMGFGSESGAELEKEFDQK	8	1	1	AT5G52310.1		3018.32	0	6.44612e-06
	DVPIHHPLSELSDR	104	1	1	AT5G52310.1		1614.82	0	2.47319e-05
	GGGGMVGRIKGWFGGGATDEVKPESPHSVEEAPK	8	1	1	AT5G52310.1		3423.67	0	1.35132e-06
	VTDPTKEETGGVPEIAESFGNMEVTDESPDQKPGQFER	8	1	1	AT5G52310.1	M22(Oxidation)	4166.88	0	1.27347e-08
	DFPTRSHDFDMKTETGMDTNSPSR	15	1	1	AT5G52310.1	M11(Oxidation); M17(Oxidation)	2804.18	0	9.88348e-06
	FASMLGYSGEIPVGDQTQVAGTVDEK	8	1	1	AT5G52310.1	M4(Oxidation)	2715.28	0	1.03641e-06
	EFKEFDQDFDSVLGK	36	1	1	AT5G52310.1		1803.84	0	0.000102479
	SPHSVEESPQSLGSTVVPVQK	44	1	1	AT5G52310.1		2192.12	0	8.41361e-09
	SHDFDMKTETGMDTNSPSRSHEFDLK	24	1	1	AT5G52310.1		3012.3	0	5.17974e-05
	EESRETHHESLNTPVSLLSGTEDVTSTFAPSGDDEYLDGQRK	40	1	1	AT5G52310.1		4634.15	0	2.13386e-07
	SHDFDMKTETGMDTNSPSR	9	1	1	AT5G52310.1	M6(Oxidation); M12(Oxidation)	2187.89	0	9.66847e-08
	NEYSPESDGGLGAPLGGNFPVRSHELDLK	44	1	1	AT5G52310.1		3055.46	0	2.9044e-07
	TETGMDTNSPSRSHEFDLKTESGNDK	12	1	1	AT5G52310.1		2883.27	0	0.00101231
	GEDKSVSGRDYVAEK	16	1	1	AT5G52310.1		1639.79	0	0.000878725
	LTTEEEDKAFSDMVAEKLQIGGEEEK	8	1	1	AT5G52310.1		2926.39	0	0.000214801
	EEKRDVPIHHPLSELSDR	24	1	1	AT5G52310.1		2157.1	0	0.000455821
	NDSGRNEYSPESDGGLGAPLGGNFPVRSHELDLK	16	1	1	AT5G52310.1		3584.69	0	1.35653e-05
	SSGWFGGGATEEVKPKSPHSVEESPQSLGSTVVPVQKEL	12	1	1	AT5G52310.1		4052.01	0	0.000235098
	EVEKISTEKAASEEGEAVEEEVK	44	1	1	AT5G52310.1		2520.21	0	6.25128e-10
	MDQTEEPPLNTHQQHPEEVEHHENGATK	13	1	1	AT5G52310.1	N-Term(Acetyl)	3304.45	0	6.65415e-08
	MDQTEEPPLNTHQQHPEEVEHHENGATKMFR	1	1	1	AT5G52310.1	N-Term(Acetyl)	3738.65	0	1.11292e-05
	ISTEKAASEEGEAVEEEVK	36	1	1	AT5G52310.1	S8(Phospho)	2114.93	0	0.00112468	172.233	1	S(2): 0.0; T(3): 0.0; S(8): 100.0
	ISTEKAASEEGEAVEEEVKGGGGMVGR	9	1	1	AT5G52310.1	S8(Phospho)	2786.25	0	2.0553e-07	69.0305	0.994633	S(2): 0.3; T(3): 0.3; S(8): 99.5
	GWFGGGATDEVKPESPHSVEEAPK	9	1	1	AT5G52310.1	S15(Phospho)	2591.14	0	2.21174e-07	97.1365	0.997317	T(8): 0.0; S(15): 99.7; S(18): 0.3
	EVEKISTEKAASEEGEAVEEEVK	27	1	1	AT5G52310.1	S12(Phospho)	2600.18	0	0.000184025	79.9731	0.996327	S(6): 0.2; T(7): 0.2; S(12): 99.6
	IKGWFGGGATDEVKPESPHSVEEAPK	35	1	1	AT5G52310.1	S17(Phospho)	2832.32	0	6.03333e-07	81.2654	0.997711	T(10): 0.0; S(17): 99.8; S(20): 0.2
	TESGNDKNSPMGFGSESGAELEK	9	1	1	AT5G52310.1	S15(Phospho)	2451	0	8.89552e-11	138.615	0.999874	T(1): 0.0; S(3): 0.0; S(9): 0.0; S(15): 100.0; S(17): 0.0
	DVPIHHPLSELSDREESR	16	1	1	AT5G52310.1	S12(Phospho)	2196	0	0.00699067	3.74558	0.180689	S(9): 74.3; S(12): 18.1; S(17): 7.6
	MDQTEEPPLNTHQQHPEEVEHHENGATK	22	1	1	AT5G52310.1	T4(Phospho)	3342.41	0	0.000179635	20.0691	0.906164	T(4): 90.6; T(11): 8.5; T(27): 0.9
	HGQSNEHEQDHDLVEEDDDDDELEPEVIDAPGVTGKPR	61	1	1	AT5G52310.1	Q3(Deamidated)	4266.87	0	9.27873e-10
	HGQSNEHEQDHDLVEEDDDDDELEPEVIDAPGVTGKPR	33	1	1	AT5G52310.1	Q3(Deamidated); Q9(Deamidated)	4267.85	0	3.63925e-11
	FASMLGYSGEIPVGDQTQVAGTVDEKLTPVNEK	6	1	1	AT5G52310.1	Q18(Deamidated)	3481.72	0	1.90284e-06
	DQETESAVTTKLPISGGGSGVEEQRGEDK	4	1	1	AT5G52310.1	Q24(Deamidated)	3005.44	0	2.75599e-06
	ETHHESLNTPVSLLSGTEDVTSTFAPSGDDEYLDGQRK	16	1	1	AT5G52310.1	Q36(Deamidated)	4133.93	0	3.14196e-06
	VNVETPITLEEESAVSDYLSGVSNYQSKVTDPTK	3	1	1	AT5G52310.1	Q26(Deamidated)	3700.8	0	8.58954e-07
	EETGGVPEIAESFGNMEVTDESPDQKPGQFER	3	1	1	AT5G52310.1	N15(Deamidated); Q29(Deamidated)	3511.55	0	1.66961e-06
	ETHHESLNTPVSLLSGTEDVTSTFAPSGDDEYLDGQR	10	1	1	AT5G52310.1	N8(Deamidated)	4005.82	0	0.000772177
	ETHHESLNTPVSLLSGTEDVTSTFAPSGDDEYLDGQRK	3	1	1	AT5G52310.1	N8(Deamidated); Q36(Deamidated)	4134.91	0	8.02918e-08
	EESRETHHESLNTPVSLLSGTEDVTSTFAPSGDDEYLDGQR	6	1	1	AT5G52310.1	N12(Deamidated)	4507.04	0	1.69015e-05
	LTPVNEKDQETESAVTTKLPISGGGSGVEEQR	6	1	1	AT5G52310.1	Q9(Deamidated)	3357.67	0	1.24234e-06
	NSLTKHGQSNEHEQDHDLVEEDDDDDELEPEVIDAPGVTGKPR	32	1	1	AT5G52310.1	N1(Deamidated)	4810.16	0	5.56006e-06
	KVNVETPITLEEESAVSDYLSGVSNYQSKVTDPTK	9	1	1	AT5G52310.1	Q27(Deamidated)	3828.89	0	1.77405e-05
	TESGNDKNSPMGFGSESGAELEK	2	1	1	AT5G52310.1	N5(Deamidated); N8(Deamidated)	2373.01	0	8.18463e-07
	DFPTRSHDFDMKTETGMDTNSPSR	2	1	1	AT5G52310.1	N20(Deamidated)	2773.2	0	2.46745e-05
	NDSGRNEYSPESDGGLGAPLGGNFPVR	6	1	1	AT5G52310.1	N1(Deamidated)	2763.27	0	3.93254e-05
	QSTYTEKFASMLGYSGEIPVGDQTQVAGTVDEKLTPVNEK	12	1	1	AT5G52310.1	Q1(Deamidated)	4319.1	0	1.81359e-05
	SHELDLKNESDIDKDVPTGFDGEPDFLAK	8	1	1	AT5G52310.1	N8(Deamidated)	3232.51	0	2.6796e-06
	EESRETHHESLNTPVSLLSGTEDVTSTFAPSGDDEYLDGQRK	12	1	1	AT5G52310.1	N12(Deamidated)	4635.14	0	2.85405e-08
	EFDQDFDSVLGKDSPAKFPGESGVVFPVGFGDESGAELEK	3	1	1	AT5G52310.1	Q4(Deamidated)	4233.98	0	2.92717e-05
	LTTEEEDKAFSDMVAEKLQIGGEEEK	1	1	1	AT5G52310.1	Q19(Deamidated)	2927.38	0	0.000128121
	ETHHESLNTPVSLLSGTEDVTSTFAPSGDDEYLDGQRK	52	1	1	AT5G52310.1		4132.92	0	5.89334e-06
	EETGGVPEIAESFGNMEVTDESPDQKPGQFER	14	1	1	AT5G52310.1	M16(Oxidation)	3525.54	0	9.30522e-08
	TTFTSDKEEKR	8	1	1	AT5G52310.1		1341.66	0	2.70014e-06
	TETGMDTNSPSR	6	1	1	AT5G52310.1	M5(Oxidation)	1311.55	0	1.57463e-05
	AFSDMVAEKLQIGGEEEKK	12	1	1	AT5G52310.1		2109.05	0	0.000752718
	EESRETHHESLNTPVSLLSGTEDVTSTFAPSGDDEYLDGQR	24	1	1	AT5G52310.1		4506.03	0	0.000546846
	AFSDMVAEKLQIGGEEEK	8	1	1	AT5G52310.1	M5(Oxidation)	1996.95	0	4.23139e-06
	SHDFDMKTETGMDTNSPSRSHEFDLK	7	1	1	AT5G52310.1	M12(Oxidation)	3028.29	0	6.40223e-07
	TEEPKQSTYTEKFASMLGYSGEIPVGDQTQVAGTVDEK	8	1	1	AT5G52310.1	M16(Oxidation)	4136.94	0	2.86086e-05
	TESGNDKNSPMGFGSESGAELEKEFDQK	8	1	1	AT5G52310.1	M11(Oxidation)	3034.32	0	0.000102573
	VFPVVSSDYTKPTESVPVQEASYGHDAPAHSVRTTFTSDK	12	1	1	AT5G52310.1		4337.1	0	0.000790777
	VTDPTKEETGGVPEIAESFGNMEVTDESPDQKPGQFER	6	1	1	AT5G52310.1	N21(Deamidated)	4151.89	0	8.57215e-13
	VNVETPITLEEESAVSDYLSGVSNYQSKVTDPTK	6	1	1	AT5G52310.1	N2(Deamidated); N24(Deamidated)	3701.79	0	2.9058e-09
	EETGGVPEIAESFGNMEVTDESPDQKPGQFER	6	1	1	AT5G52310.1	Q25(Deamidated)	3510.57	0	1.08388e-10
	NSLTKHGQSNEHEQDHDLVEEDDDDDELEPEVIDAPGVTGKPR	42	1	1	AT5G52310.1	Q8(Deamidated); Q14(Deamidated)	4811.14	0	9.5616e-05
	DYVAEKLTTEEEDKAFSDMVAEK	5	1	1	AT5G52310.1	M19(Oxidation)	2664.23	0	1.70839e-08
	QSTYTEKFASMLGYSGEIPVGDQTQVAGTVDEK	8	1	1	AT5G52310.1	M11(Oxidation)	3552.66	0	1.67099e-08
	LTTEEEDKAFSDMVAEKLQIGGEEEK	5	1	1	AT5G52310.1	M13(Oxidation)	2942.37	0	0.000120852
	QSTYTEKFASMLGYSGEIPVGDQTQVAGTVDEKLTPVNEK	3	1	1	AT5G52310.1	M11(Oxidation)	4334.1	0	7.44826e-05
	NEYSPESDGGLGAPLGGNFPVRSHELDLKNESDIDK	12	1	1	AT5G52310.1		3856.82	0	9.53648e-05
	AFSDMVAEKLQIGGEEEKK	5	1	1	AT5G52310.1	M5(Oxidation)	2125.05	0	8.95299e-06
	AASEEGEAVEEEVK	2	1	1	AT5G52310.1	S3(Phospho)	1556.64	0	0.000687054	145.755	1	S(3): 100.0
	SHELDLKNESDIDKDVPTGFDGEPDFLAK	8	1	1	AT5G52310.1	S10(Phospho)	3311.49	0	0.0027675	57.9901	0.988065	S(1): 0.6; S(10): 98.8; T(18): 0.6
	NEYSPESDGGLGAPLGGNFPVR	2	1	1	AT5G52310.1	N1(Deamidated)	2234.04	0	2.14866e-08
	DQETESAVTTKLPISGGGSGVEEQR	7	1	1	AT5G52310.1	Q24(Deamidated)	2576.23	0	1.16727e-05
	EFDQKNDSGRNEYSPESDGGLGAPLGGNFPVR	4	1	1	AT5G52310.1	N11(Deamidated)	3410.55	0	1.26155e-05
	NSLTKHGQSNEHEQDHDLVEEDDDDDELEPEVIDAPGVTGKPR	4	1	1	AT5G52310.1	N1(Deamidated); Q8(Deamidated); Q14(Deamidated)	4812.14	0	2.65017e-05
	VFPVVSSDYTKPTESVPVQEASYGHDAPAHSVRTTFTSDK	3	1	1	AT5G52310.1	Q19(Deamidated)	4338.08	0	7.65503e-05
	KVNVETPITLEEESAVSDYLSGVSNYQSK	6	1	1	AT5G52310.1	N3(Deamidated)	3187.56	0	1.50143e-05
	NEYSPESDGGLGAPLGGNFPVRSHELDLKNESDIDK	2	1	1	AT5G52310.1	N30(Deamidated)	3857.79	0	0.00054046
	MDQTEEPPLNTHQQHPEEVEHHENGATK	4	1	1	AT5G52310.1	M1(Oxidation)	3278.44	0	2.18721e-05
	VFPVVSSDYTKPTESVPVQEASYGHDAPAHSVR	2	1	1	AT5G52310.1	Q19(Deamidated)	3557.73	0	5.176e-10
	VFPVVSSDYTKPTESVPVQEASYGHDAPAHSVRTTFTSDKEEK	1	1	1	AT5G52310.1	Q19(Deamidated)	4724.28	0	6.81104e-06
	DDFEETRDEK	16	1	1	AT5G52310.1		1283.54	8.7e-05	0.00283623
	DDFEETRDEKTEEPK	32	1	1	AT5G52310.1		1867.82	8.7e-05	0.000353365
	GRPGYGEASEEDK	8	1	1	AT5G52310.1		1394.62	8.7e-05	0.00236309
	SDDVEVETELGRDPKTETLDQFSPELSHPK	2	1	1	AT5G52310.1	Q21(Deamidated)	3399.61	0.0001	0.00313285
	TETGMDTNSPSRSHEFDLK	7	1	1	AT5G52310.1	S9(Phospho)	2231.93	0.00013	0.000435515	27.6439	0.620335	T(1): 0.3; T(3): 0.7; T(7): 16.1; S(9): 62.0; S(11): 16.1; S(13): 4.8
	DFPTRSHDFDMK	18	1	1	AT5G52310.1	M11(Oxidation)	1511.66	0.000146	0.0021274
	SHDFDMKTETGMDTNSPSRSHEFDLK	7	1	1	AT5G52310.1	M6(Oxidation); M12(Oxidation)	3044.3	0.000146	0.00213969
	LTTEEEDKAFSDMVAEK	1	1	1	AT5G52310.1	M13(Oxidation)	1958.88	0.000146	0.00147114
	TETGMDTNSPSRSHEFDLKTESGNDK	4	1	1	AT5G52310.1	M5(Oxidation)	2899.26	0.000146	0.000190737
	SHEFDLKTESGNDK	8	1	1	AT5G52310.1		1606.73	0.000146	0.000755025
	DFPTRSHDFDMK	28	1	1	AT5G52310.1		1495.66	0.000164	0.00611175
	SDDVEVETELGRDPKTETLDQFSPELSHPK	4	1	1	AT5G52310.1		3398.61	0.000186	0.00206373
	ESRDDFEETRDEK	4	1	1	AT5G52310.1		1655.71	0.000192	0.00121098
	DPKTETLDQFSPELSHPK	8	1	1	AT5G52310.1		2069.02	0.000194	0.00547862
	NESDIDKDVPTGFDGEPDFLAK	2	1	1	AT5G52310.1	N1(Deamidated)	2410.1	0.000194	0.0018223
	VTDPTKEETGGVPEIAESFGNMEVTDESPDQKPGQFER	6	1	1	AT5G52310.1	N21(Deamidated); Q31(Deamidated)	4152.88	0.000209	0.00697208
	ETHHESLNTPVSLLSGTEDVTSTFAPSGDDEYLDGQR	2	1	1	AT5G52310.1	N8(Deamidated); Q36(Deamidated)	4006.8	0.000209	0.0031938
	TETLDQFSPELSHPKERDEFK	1	1	1	AT5G52310.1	Q6(Deamidated)	2534.21	0.000239	0.00275136
	ERDEFKESR	4	1	1	AT5G52310.1		1195.57	0.00024	0.00927952
	LQIGGEEEKKETTTK	16	1	1	AT5G52310.1		1690.88	0.000266	0.00409635
	SHEFDLK	16	3	2	AT5G52300.1;AT5G52310.1		875.425	0.000313	0.0117801
	TETLDQFSPELSHPKER	4	1	1	AT5G52310.1	Q6(Deamidated)	2014.97	0.000355	0.00868477
	SKEFKEFDQDFDSVLGK	1	1	1	AT5G52310.1	Q9(Deamidated)	2019.97	0.000362	0.0151167
	AFSDMVAEK	1	1	1	AT5G52310.1	M5(Oxidation)	1013.46	0.000488	0.00214512
	DEFKESR	12	1	1	AT5G52310.1		910.424	0.000614	0.0418574
	RDVPIHHPLSELSDREESR	6	1	1	AT5G52310.1	S13(Phospho)	2352.11	0.000701	0.0106939	19.6029	0.674405	S(10): 23.3; S(13): 67.4; S(18): 9.2
	SHDFDMKTETGMDTNSPSRSHEFDLK	5	1	1	AT5G52310.1	T14(Phospho)	3092.27	0.001083	0.0190673	13.3701	0.0658351	S(1): 1.6; T(8): 36.0; T(10): 36.0; T(14): 6.6; S(16): 6.6; S(18): 6.6; S(20): 6.6
	MDQTEEPPLNTHQQHPEEVEHHENGATKMFR	1	1	1	AT5G52310.1	M1(Oxidation); M29(Oxidation)	3728.62	0.001155	0.0218621
	NDSGRNEYSPESDGGLGAPLGGNFPVRSHELDLK	3	1	1	AT5G52310.1	N23(Deamidated)	3585.71	0.001158	0.0271249
	RDVPIHHPLSELSDR	6	1	1	AT5G52310.1	S13(Phospho)	1850.89	0.001195	0.0582958	23.806	0.802534	S(10): 19.7; S(13): 80.3
	KVNVETPITLEEESAVSDYLSGVSNYQSKVTDPTK	3	1	1	AT5G52310.1	N25(Deamidated); Q27(Deamidated)	3829.89	0.001296	0.0194273
	SHELDLK	4	1	1	AT5G52310.1		841.44	0.001546	0.0254211
	TEEPKQSTYTEKFASMLGYSGEIPVGDQTQVAGTVDEK	3	1	1	AT5G52310.1	Q6(Deamidated)	4121.96	0.001744	0.0443149
	EVEKISTEK	4	1	1	AT5G52310.1		1062.56	0.001754	0.0425666
	DVPIHHPLSELSDR	2	1	1	AT5G52310.1	S12(Phospho)	1694.79	0.001903	0.0777956	53.0026	0.97323	S(9): 2.7; S(12): 97.3
	SSGWFGGGATEEVKPKSPHSVEESPQSLGSTVVPVQK	15	1	1	AT5G52310.1	S24(Phospho)	3889.88	0.002315	0.0545894	22.188	0.175739	S(1): 3.7; S(2): 3.7; T(10): 17.6; S(17): 17.6; S(20): 17.6; S(24): 17.6; S(27): 17.6; S(30): 3.7; T(31): 1.0
	DLSTRSKEFK	16	1	1	AT5G52310.1		1210.64	0.002507	0.0457052
	VNVETPITLEEESAVSDYLSGVSNYQSK	3	1	1	AT5G52310.1	N24(Deamidated)	3059.45	0.015015	0.265578
AT4G28080.1	Tetratricopeptide repeat (TPR)-like superfamily protein	28.53	1	32	34	799
	Sequence	# PSMs	# Proteins	# Protein Groups	Protein Group Accessions	Modifications	MH+ [Da]	q-Value	PEP	pRS Score	pRS Probability	pRS Site Probabilities
	LVADFGSLELSPVDGR	16	4	3	AT1G01320.2;AT1G15290.1;AT4G28080.1		1674.86	0	2.69231e-08
	NKPSFPNSTESNGEANQFNGPR	60	1	1	AT4G28080.1		2392.09	0	3.82558e-06
	TSSNELSISVAGSTSSPASK	24	1	1	AT4G28080.1		1909.94	0	1.61141e-07
	LNTNFMNVTQQPSR	16	1	1	AT4G28080.1		1649.81	0	0.000125716
	SALASSACTEQINKPTPMLSPVSVK	20	1	1	AT4G28080.1	C8(Carbamidomethyl)	2616.33	0	7.39083e-07
	TVDGETENLPNGDSSPKSSVAADGEK	16	1	1	AT4G28080.1		2604.18	0	2.38087e-06
	AAEKAFPIETAVSNARPGK	48	1	1	AT4G28080.1		1957.05	0	2.63348e-08
	KESGSTDGDSPTEKDAGDSNSGLSPKPK	32	1	1	AT4G28080.1		2791.28	0	8.12707e-07
	KVENFDLEQSKPQDQLK	24	1	1	AT4G28080.1		2046.05	0	1.26604e-06
	DHGGILPSPLNMPPMLPINHVR	12	1	1	AT4G28080.1		2405.26	0	3.99997e-06
	SPLNKKQNNSSVVGERPVNDK	32	1	1	AT4G28080.1		2310.21	0	7.17923e-07
	DHGGILPSPLNMPPMLPINHVRR	12	1	1	AT4G28080.1		2561.36	0	6.14597e-05
	AGKLFSYKEVALAPPGTIVK	44	1	1	AT4G28080.1		2089.2	0	1.8832e-05
	SAQMAEDSDTCLLNKSPTANDSNGSESVIGVKLQK	20	1	1	AT4G28080.1	C11(Carbamidomethyl)	3694.75	0	3.43163e-06
	DLCDAELKTVDGETENLPNGDSSPKSSVAADGEK	24	1	1	AT4G28080.1	C3(Carbamidomethyl)	3548.62	0	3.24037e-06
	IVAEQLPEETKAPQNLDAAK	28	1	1	AT4G28080.1		2165.14	0	0.000325064
	TVDGETENLPNGDSSPKSSVAADGEK	40	1	1	AT4G28080.1	S14(Phospho)	2684.15	0	2.54806e-05	73.1376	0.960202	T(1): 0.0; T(6): 0.0; S(14): 96.0; S(15): 3.9; S(18): 0.0; S(19): 0.1
	SAQMAEDSDTCLLNKSPTANDSNGSESVIGVK	4	1	1	AT4G28080.1	C11(Carbamidomethyl); N14(Deamidated)	3326.52	0	5.9741e-07
	KESGSTDGDSPTEKDAGDSNSGLSPKPK	2	1	1	AT4G28080.1	N20(Deamidated)	2792.28	0	1.2576e-07
	NKPSFPNSTESNGEANQFNGPR	53	1	1	AT4G28080.1	Q17(Deamidated)	2393.07	0	0.000290319
	SAQMAEDSDTCLLNKSPTANDSNGSESVIGVK	4	1	1	AT4G28080.1	C11(Carbamidomethyl)	3325.52	0	1.93017e-11
	VKGKPGQSPGPVSEENQK	16	1	1	AT4G28080.1		1865.96	0	0.000864291
	DLCDAELKTVDGETENLPNGDSSPKSSVAADGEK	36	1	1	AT4G28080.1	C3(Carbamidomethyl); S22(Phospho)	3628.59	0	1.6033e-08	59.036	0.7541	T(9): 0.0; T(14): 1.2; S(22): 75.4; S(23): 17.7; S(26): 4.5; S(27): 1.2
	DLCDAELKTVDGETENLPNGDSSPKSSVAADGEK	4	1	1	AT4G28080.1	C3(Carbamidomethyl); N16(Deamidated)	3549.61	0	3.18798e-05
	SAQMAEDSDTCLLNKSPTANDSNGSESVIGVK	3	1	1	AT4G28080.1	M4(Oxidation); C11(Carbamidomethyl)	3341.53	0	1.05102e-08
	SAQMAEDSDTCLLNKSPTANDSNGSESVIGVKLQK	5	1	1	AT4G28080.1	M4(Oxidation); C11(Carbamidomethyl)	3710.74	0	7.79086e-07
	IAVDGPEKVNAQDAESENK	8	1	1	AT4G28080.1		2013.97	0	0.00134202
	EIKNVEVEKAAEK	8	1	1	AT4G28080.1		1486.81	0	0.000700849
	DHGGILPSPLNMPPMLPINHVR	4	1	1	AT4G28080.1	M12(Oxidation); M15(Oxidation)	2437.24	0	1.93142e-06
	DHGGILPSPLNMPPMLPINHVRR	4	1	1	AT4G28080.1	M12(Oxidation); M15(Oxidation)	2593.34	0	4.33036e-06
	AAEKAFPIETAVSNARPGKSK	16	1	1	AT4G28080.1		2172.18	0.000141	0.00327556
	KLSASAPPYTPTTIPIFGSIAVPGFK	24	1	1	AT4G28080.1		2660.47	0.000141	0.00326844
	ARPKVKGKPGQSPGPVSEENQK	20	1	1	AT4G28080.1		2318.25	0.000146	0.00155762
	VENFDLEQSKPQDQLK	12	1	1	AT4G28080.1		1917.95	0.000149	5.63355e-05
	VVVGGSELTSSPKEIKNVEVEK	4	1	1	AT4G28080.1		2328.26	0.000149	0.000357087
	LNTNFMNVTQQPSR	3	1	1	AT4G28080.1	M6(Oxidation)	1665.8	0.000153	0.000629014
	LSASAPPYTPTTIPIFGSIAVPGFK	16	1	1	AT4G28080.1		2532.36	0.000186	0.00141073
	IAVDGPEKVNAQDAESENKHVATETEAENTDCNEQGR	8	1	1	AT4G28080.1	C32(Carbamidomethyl)	4055.8	0.000187	0.0021753
	ALEQQEAAR	4	1	1	AT4G28080.1		1015.52	0.000192	0.00341265
	IAVDGPEKVNAQDAESENKHVATETEAENTDCNEQGR	7	1	1	AT4G28080.1	N29(Deamidated); C32(Carbamidomethyl)	4056.81	0.000362	0.0145895
	GHLSVSDLLDYITPDSGIK	4	1	1	AT4G28080.1		2030.04	0.000415	0.00450556
	KTEDPKPEPAVKGLGK	4	1	1	AT4G28080.1		1693.95	0.000503	0.0283172
	NGTPKPDASISSKGHLSVSDLLDYITPDSGIK	24	1	1	AT4G28080.1		3312.7	0.000507	0.00906634
	MFVKSPLNKK	3	1	1	AT4G28080.1	M1(Oxidation)	1207.69	0.000859	0.0142123
	EVALAPPGTIVK	24	1	1	AT4G28080.1		1194.71	0.003706	0.0796835
	NGTPKPDASISSKGHLSVSDLLDYITPDSGIK	1	1	1	AT4G28080.1	N1(Deamidated)	3313.69	0.004053	0.0793483
	VVVGGSELTSSPKEIKNVEVEK	2	1	1	AT4G28080.1	S11(Phospho)	2408.24	0.004163	0.102929	13.6554	0.502416	S(6): 9.4; T(9): 20.2; S(10): 20.2; S(11): 50.2
	VASEFKLNDGHILQDIDIEDQSEGGANALNVNSLR	4	1	1	AT4G28080.1	N8(Deamidated); Q14(Deamidated); Q21(Deamidated); N32(Deamidated)	3785.82	0.168621	0.920672
AT1G37130.1	nitrate reductase 2	39.37	1	33	34	905
	Sequence	# PSMs	# Proteins	# Protein Groups	Protein Group Accessions	Modifications	MH+ [Da]	q-Value	PEP	pRS Score	pRS Probability	pRS Site Probabilities
	KGGALNVCFEGSEDLPGGAGTAGSK	40	1	1	AT1G37130.1	C8(Carbamidomethyl)	2379.12	0	1.27887e-07
	AHQNQTTNQTVFLKPAK	32	1	1	AT1G37130.1		1926.01	0	1.1352e-08
	SNAELEPSVLDPR	48	1	1	AT1G37130.1		1426.72	0	1.74956e-08
	SDSPKAHQNQTTNQTVFLKPAK	76	1	1	AT1G37130.1		2440.25	0	9.68754e-06
	LTGKHPFNSEAPLNR	100	1	1	AT1G37130.1		1680.88	0	2.35979e-06
	LEPGLNGVVR	48	1	1	AT1G37130.1		1053.61	0	0.000173355
	TNVCKPHKGEIGIVFEHPTLPGNESGGWMAK	8	1	1	AT1G37130.1	C4(Carbamidomethyl)	3390.67	0	7.04968e-08
	SYKPPVPGRSDSPK	64	1	1	AT1G37130.1		1514.8	0	1.57187e-06
	KSNAELEPSVLDPR	48	1	1	AT1G37130.1		1554.81	0	0.000142948
	KHNSADSCWIIVHGHIYDCTR	4	1	1	AT1G37130.1	C8(Carbamidomethyl); C19(Carbamidomethyl)	2569.18	0	9.59919e-07
	DEYTADSWIERNPSMVR	20	1	1	AT1G37130.1		2068.94	0	0.000125867
	LMHHGFITPVPLHYVR	7	2	2	AT1G77760.1;AT1G37130.1	M2(Oxidation)	1933.03	0	2.68537e-06
	LMHHGFITPVPLHYVR	24	2	2	AT1G77760.1;AT1G37130.1		1917.03	0	2.99424e-05
	YGTSIKKEYAMDPSR	4	1	1	AT1G37130.1		1745.85	0	0.000291091
	DEYTADSWIERNPSMVR	12	1	1	AT1G37130.1	M15(Oxidation)	2084.93	0	0.000118393
	SKGFNWGSAGVSTSVWR	8	1	1	AT1G37130.1		1825.9	0	0.000163465
	AHQNQTTNQTVFLKPAKVHDDDEDVSSEDENETHNSNAVYYK	86	1	1	AT1G37130.1	S27(Phospho)	4898.13	0	0.00127022	17.9105	0.455169	T(6): 6.0; T(7): 6.0; T(10): 6.0; S(26): 15.4; S(27): 45.5; T(33): 15.4; S(36): 2.7; Y(40): 1.5; Y(41): 1.5
	SADAPPSLKKSVSTPFMNTTAK	22	1	1	AT1G37130.1	S13(Phospho)	2358.14	0	0.000381021	50.4449	0.756249	S(1): 0.0; S(7): 0.0; S(11): 4.4; S(13): 75.6; T(14): 17.5; T(19): 1.2; T(20): 1.2
	VHDDDEDVSSEDENETHNSNAVYYK	24	1	1	AT1G37130.1	S9(Phospho)	2991.14	0	2.48433e-09	74.7417	0.858264	S(9): 85.8; S(10): 14.2; T(16): 0.0; S(19): 0.0; Y(23): 0.0; Y(24): 0.0
	TNVCKPHKGEIGIVFEHPTLPGNESGGWMAK	2	1	1	AT1G37130.1	C4(Carbamidomethyl); N23(Deamidated)	3391.67	0	1.41751e-07
	YGTSIKKEYAMDPSR	7	1	1	AT1G37130.1	M11(Oxidation)	1761.85	0	4.30729e-06
	SDSPKAHQNQTTNQTVFLKPAK	5	1	1	AT1G37130.1	Q14(Deamidated)	2441.25	0	6.39506e-06
	LTGKHPFNSEAPLNR	3	1	1	AT1G37130.1	N14(Deamidated)	1681.86	0	0.000135891
	AKVPVQLVEK	24	1	1	AT1G37130.1		1110.69	8.7e-05	0.000423511
	MQYNIKEDFLIF	28	1	1	AT1G37130.1		1560.78	8.7e-05	0.00187242
	ESDNFYHFKDNR	16	1	1	AT1G37130.1		1571.69	8.7e-05	0.00291932
	AASVDNRQYARLEPGLNGVVR	8	1	1	AT1G37130.1	N-Term(Acetyl)	2327.22	8.7e-05	6.80139e-05
	FLMDHPGGSDSILINAGTDCTEEFEAIHSDK	1	1	1	AT1G37130.1	M3(Oxidation); C20(Carbamidomethyl)	3422.51	0.000153	0.000408715
	EMIRKSNAELEPSVLDPR	20	1	1	AT1G37130.1		2084.07	0.000164	0.00656197
	HLEKSADAPPSLKK	16	1	1	AT1G37130.1		1520.84	0.000164	0.00632043
	MQYNIKEDFLIF	6	1	1	AT1G37130.1	M1(Oxidation)	1576.77	0.00026	0.000750719
	EMIRKSNAELEPSVLDPR	5	1	1	AT1G37130.1	M2(Oxidation)	2100.07	0.000507	0.00837824
	SVSTPFMNTTAK	1	1	1	AT1G37130.1	M7(Oxidation)	1299.62	0.000787	0.0109433
	NPSMVRLTGKHPFNSEAPLNR	1	1	1	AT1G37130.1	M4(Oxidation)	2381.21	0.000846	0.0130751
	AASVDNRQYAR	6	1	1	AT1G37130.1	N-Term(Acetyl)	1292.63	0.001002	0.020307
	SYKPPVPGR	8	1	1	AT1G37130.1		1000.56	0.001128	0.0736857
	MYSMSEVK	1	1	1	AT1G37130.1	M1(Oxidation); M4(Oxidation)	1006.42	0.00124	0.0271974
	GVPLCDVLR	16	1	1	AT1G37130.1	C5(Carbamidomethyl)	1028.56	0.00134	0.0275571
	LEPGLNGVVR	5	1	1	AT1G37130.1	N6(Deamidated)	1054.59	0.001632	0.039626
	HPFNSEAPLNR	24	1	1	AT1G37130.1		1281.63	0.001934	0.0334901
	SYKPPVPGRSDSPK	5	1	1	AT1G37130.1	S12(Phospho)	1594.76	0.005244	0.182054	29.1302	0.819091	S(1): 0.1; Y(2): 0.1; S(10): 17.8; S(12): 81.9
	KSVSTPFMNTTAK	3	1	1	AT1G37130.1	S4(Phospho)	1491.69	0.008768	0.191449	49.335	0.861205	S(2): 0.5; S(4): 86.1; T(5): 13.3; T(10): 0.0; T(11): 0.0
	SADAPPSLKK	4	1	1	AT1G37130.1		1013.56	0.011995	0.263159
	SVSTPFMNTTAK	7	1	1	AT1G37130.1	S3(Phospho)	1363.59	0.012817	0.269479	34.8793	0.91241	S(1): 4.3; S(3): 91.2; T(4): 4.3; T(9): 0.0; T(10): 0.0
	GVPLCDVLRR	4	1	1	AT1G37130.1	C5(Carbamidomethyl)	1184.66	0.04152	0.721836
	SVSTPFMNTTAK	4	1	1	AT1G37130.1		1283.63	0.060156	0.77483
AT1G64500.1	Glutaredoxin family protein	41.3	1	11	11	100
	Sequence	# PSMs	# Proteins	# Protein Groups	Protein Group Accessions	Modifications	MH+ [Da]	q-Value	PEP	pRS Score	pRS Probability	pRS Site Probabilities
	SIAAQIPTTMVK	6	1	1	AT1G64500.1	M10(Oxidation)	1275.7	0	1.72291e-05
	LRPESDDRTESTQSSYSGPR	16	1	1	AT1G64500.1		2268.05	0	1.66406e-08
	KSASFHTLDELEVR	18	1	1	AT1G64500.1	S4(Phospho)	1711.8	0	0.00017799	38.0972	0.701815	S(2): 14.9; S(4): 70.2; T(7): 14.9
	AIMEQQGVVVDER	4	1	1	AT1G64500.1	M3(Oxidation)	1489.73	0	3.69884e-06
	TESMSKLRPESDDRTESTQSSYSGPR	3	1	1	AT1G64500.1	M4(Oxidation)	2947.33	0	0.000369596
	SVKENIFVKR	12	1	1	AT1G64500.1		1219.72	8.7e-05	0.00102684
	ANVVADVYKPPPSSFAVFDVNAIQEPWLK	3	1	1	AT1G64500.1	Q24(Deamidated)	3202.65	0.0001	0.000455035
	DVSLDAGVLSELKELLQDEASVAPPRVFVK	8	1	1	AT1G64500.1		3224.74	0.00012	0.000363582
	ANVVADVYKPPPSSFAVFDVNAIQEPWLK	12	1	1	AT1G64500.1		3201.66	0.000141	0.00296231
	SVKENIFVK	16	1	1	AT1G64500.1		1063.61	0.000851	0.0106143
	TESMSKLRPESDDR	1	1	1	AT1G64500.1	M4(Oxidation)	1666.76	0.000963	0.0195902
	GRYLGGAAEVTAMNENGK	1	1	1	AT1G64500.1	M13(Oxidation)	1853.88	0.006727	0.14122
AT1G04080.1	Tetratricopeptide repeat (TPR)-like superfamily protein	20.57	3	11	12	170
	Sequence	# PSMs	# Proteins	# Protein Groups	Protein Group Accessions	Modifications	MH+ [Da]	q-Value	PEP	pRS Score	pRS Probability	pRS Site Probabilities
	SAEESAAAAVAVAGDASESAASESGEKADEGR	44	3	1	AT1G04080.1		2980.32	0	2.59346e-06
	DGDFNKVVKLYER	20	2	1	AT1G04080.1		1582.82	0	8.20107e-06
	KQPEIHLFAAR	24	3	1	AT1G04080.1		1309.74	0	1.92055e-05
	SADDFLASDRTK	32	3	1	AT1G04080.1		1325.63	0	0.0012562
	ATQVFVKKQPEIHLFAAR	8	3	1	AT1G04080.1		2083.18	0	0.00110422
	SQVDGSTEQSPKLESASSTEPEELKK	12	3	1	AT1G04080.1	S10(Phospho)	2871.31	0	3.68495e-07	41.4491	0.794432	S(1): 0.2; S(6): 2.5; T(7): 7.4; S(10): 79.4; S(15): 7.4; S(17): 2.5; S(18): 0.4; T(19): 0.2
	SAEESAAAAVAVAGDASESAASESGEK	12	3	1	AT1G04080.1		2452.1	0	0.000335645
	AAYQLVHSEISPGLLEAVIKHANMEYR	1	3	1	AT1G04080.1	M24(Oxidation)	3055.58	0	7.13371e-06
	LESASSTEPEELKKYVGIR	8	3	1	AT1G04080.1		2136.12	0.000187	0.00227802
	SADDFLASDRTKMAK	3	3	1	AT1G04080.1	M13(Oxidation)	1671.8	0.000507	0.00735175
	EIDYLEPLVEK	4	3	1	AT1G04080.1		1347.7	0.000701	0.0174388
	IAQDNIAKIRK	2	2	1	AT1G04080.1	Q3(Deamidated)	1270.75
AT2G35050.1	Protein kinase superfamily protein with octicosapeptide/Phox/Bem1p domain	23.55	1	19	20	353
	Sequence	# PSMs	# Proteins	# Protein Groups	Protein Group Accessions	Modifications	MH+ [Da]	q-Value	PEP	pRS Score	pRS Probability	pRS Site Probabilities
	KNVETNTPEHVSQTETSAK	28	1	1	AT2G35050.1		2100.01	0	0.0002879
	SEDHVENNLSAKEPK	32	1	1	AT2G35050.1		1696.81	0	0.000144554
	SAPLHVQPQPHYIPYSVNPETPLESLVPHYPQKPEQGFLR	16	1	1	AT2G35050.1		4590.36	0	0.000181356
	EEQIFHVQDPETSSKEAK	40	1	1	AT2G35050.1		2102	0	3.40542e-05
	SLQVIKNDDLEELK	36	1	1	AT2G35050.1		1643.89	0	9.27574e-06
	SLRKSEDHVENNLSAK	8	1	1	AT2G35050.1	S5(Phospho)	1906.9	0	0.000123999	42.8351	0.853753	S(1): 14.6; S(5): 85.4; S(14): 0.1
	SAPLHVQPQPHYIPYSVNPETPLESLVPHYPQKPEQGFLR	22	1	1	AT2G35050.1	N18(Deamidated)	4591.36	0	1.31032e-05
	SAPLHVQPQPHYIPYSVNPETPLESLVPHYPQKPEQGFLR	20	1	1	AT2G35050.1	Q9(Deamidated); Q36(Deamidated)	4592.36	0	0.000153219
	IKRNTLVTGGVR	8	1	1	AT2G35050.1		1313.8	0	6.60052e-05
	NVETNTPEHVSQTETSAK	36	1	1	AT2G35050.1		1971.92	8.7e-05	0.00204782
	TVRDPTETNRLSK	24	1	1	AT2G35050.1		1516.8	8.7e-05	0.00108437
	EFLADILKTK	16	1	1	AT2G35050.1		1177.68	0.000141	0.00134145
	DDSFQKVNDHPISTVESNLSAKEPK	4	1	1	AT2G35050.1		2785.37	0.000149	0.000258314
	EFLADILK	24	1	1	AT2G35050.1		948.538	0.000186	0.000309328
	TMSSSAVHTKPHAVNHQIHK	8	1	1	AT2G35050.1		2210.12	0.000192	0.00128889
	EEAPIVTQTSSSTPDPSSSTLSEK	4	1	1	AT2G35050.1		2478.17	0.000355	0.0230035
	SLRKSEDHVENNLSAK	8	1	1	AT2G35050.1		1826.93	0.000365	0.00798515
	ELGSGTFGTVYHGKWR	4	1	1	AT2G35050.1		1794.89	0.001612	0.0407484
	TMSSSAVHTKPHAVNHQIHK	1	1	1	AT2G35050.1	M2(Oxidation)	2226.11	0.002244	0.053373
	VGDFGLSKIKR	4	1	1	AT2G35050.1		1219.72	0.002767	0.0533715
	EEAPISMKISNSTPDPK	1	1	1	AT2G35050.1	M7(Oxidation)	1859.91	0.003799	0.0812563
	LRTMSSSAVHTKPHAVNHQIHK	1	1	1	AT2G35050.1	M4(Oxidation)	2495.3	0.005376	0.0866401
	AVPQGHNEKGDIVVDINDRFPR	4	1	1	AT2G35050.1		2476.27	0.011477	0.250037
	NTLVTGGVRGTLPWMAPELLSGSSSK	3	1	1	AT2G35050.1	S24(Phospho)	2738.36	0.274958	0.957989	10.2473	0.138069	T(2): 13.8; T(5): 6.9; T(11): 30.9; S(21): 13.8; S(23): 13.8; S(24): 13.8; S(25): 6.9
	SLQVIKNDDLEELK	1	1	1	AT2G35050.1	Q3(Deamidated); N7(Deamidated)	1645.86
AT4G22670.1	HSP70-interacting protein 1	63.49	1	42	43	1638
	Sequence	# PSMs	# Proteins	# Protein Groups	Protein Group Accessions	Modifications	MH+ [Da]	q-Value	PEP	pRS Score	pRS Probability	pRS Site Probabilities
	AMEALSEGNFDEAIEHLTR	48	1	1	AT4G22670.1		2132.99	0	7.55921e-13
	GKAMEALSEGNFDEAIEHLTR	80	1	1	AT4G22670.1		2318.1	0	3.24598e-10
	MGDSSVEVTDENR	16	1	1	AT4G22670.1		1438.61	0	3.49903e-09
	MGDSSVEVTDENR	6	1	1	AT4G22670.1	M1(Oxidation)	1454.6	0	1.96807e-08
	AITLNPTSAIMYGNR	40	1	1	AT4G22670.1		1621.84	0	1.65723e-05
	AITLNPTSAIMYGNR	12	1	1	AT4G22670.1	M11(Oxidation)	1637.83	0	3.7035e-07
	AMLGEWAEAAKDLHLASTIDYDEEISAVLKK	28	1	1	AT4G22670.1		3417.72	0	6.02236e-13
	DANAALEINPDSAKGYK	52	1	1	AT4G22670.1		1776.87	0	9.35642e-08
	EAAQEAKGKAMEALSEGNFDEAIEHLTR	52	1	1	AT4G22670.1		3045.46	0	7.20262e-09
	IPTGVHEEDKDTKPR	80	1	1	AT4G22670.1		1721.88	0	1.48974e-06
	MGDSSVEVTDENREAAQEAK	24	1	1	AT4G22670.1		2165.95	0	5.72007e-07
	DANAALEINPDSAK	32	1	1	AT4G22670.1		1428.7	0	3.11991e-08
	ILNDPELMTAFSDPEVMAALQDVMKNPANLAK	50	1	1	AT4G22670.1	M8(Oxidation)	3502.71	0	3.84221e-06
	AMLGEWAEAAKDLHLASTIDYDEEISAVLKK	12	1	1	AT4G22670.1	M2(Oxidation)	3433.73	0	1.52634e-09
	AMEALSEGNFDEAIEHLTR	16	1	1	AT4G22670.1	M2(Oxidation)	2148.99	0	2.12154e-08
	ILNDPELMTAFSDPEVMAALQDVMKNPANLAKHQANPK	20	1	1	AT4G22670.1		4162.07	0	2.23422e-09
	GKAMEALSEGNFDEAIEHLTR	30	1	1	AT4G22670.1	M4(Oxidation)	2334.1	0	1.28386e-09
	DANAALEINPDSAKGYKSR	96	1	1	AT4G22670.1		2020.01	0	3.63875e-10
	DYLESLGAKIPTGVHEEDKDTKPR	48	1	1	AT4G22670.1		2698.37	0	2.96344e-07
	DLHLASTIDYDEEISAVLKK	156	1	1	AT4G22670.1		2260.18	0	1.80974e-07
	AMLGEWAEAAK	2	1	1	AT4G22670.1	M2(Oxidation)	1192.57	0	0.000160713
	MGDSSVEVTDENREAAQEAK	11	1	1	AT4G22670.1	M1(Oxidation)	2181.95	0	8.03096e-08
	ILNDPELMTAFSDPEVMAALQDVMKNPANLAK	24	1	1	AT4G22670.1		3486.74	0	1.16243e-07
	AMLGEWAEAAK	8	1	1	AT4G22670.1		1176.57	0	1.59646e-05
	ASVYIKLKKPNAAIR	52	1	1	AT4G22670.1		1672.02	0	4.3391e-05
	SDPSLLTTPSLSFFR	24	1	1	AT4G22670.1		1667.87	0	1.35026e-05
	EAAQEAKGKAMEALSEGNFDEAIEHLTR	18	1	1	AT4G22670.1	M11(Oxidation)	3061.45	0	5.594e-09
	ASVYIKLK	24	1	1	AT4G22670.1		921.576	0	3.71491e-05
	KVEPNAHKLEEHR	20	1	1	AT4G22670.1		1586.84	0	7.03335e-06
	HQANPKVAPVIAK	32	1	1	AT4G22670.1		1372.8	0	4.53071e-06
	VFIDQCKSDPSLLTTPSLSFFRDYLESLGAK	56	1	1	AT4G22670.1	C6(Carbamidomethyl)	3534.76	0	1.6903e-07
	RAEAQAAYDKAK	20	1	1	AT4G22670.1		1321.68	0	7.36268e-05
	SFVVEESDDDMDETEEVKPK	24	1	1	AT4G22670.1		2328	0	4.34689e-08
	VFIDQCKSDPSLLTTPSLSFFR	20	1	1	AT4G22670.1	C6(Carbamidomethyl)	2558.3	0	2.18337e-05
	DYLESLGAKIPTGVHEEDK	20	1	1	AT4G22670.1		2101.04	0	2.47133e-08
	MDSTKLSELKVFIDQCK	4	1	1	AT4G22670.1	N-Term(Acetyl); C16(Carbamidomethyl)	2084.04	0	7.96992e-05
	ILNDPELMTAFSDPEVMAALQDVMKNPANLAKHQANPK	17	1	1	AT4G22670.1	N26(Deamidated)	4163.06	0	7.43864e-05
	EAAQEAKGKAMEALSEGNFDEAIEHLTR	1	1	1	AT4G22670.1	Q4(Deamidated); N18(Deamidated)	3047.44	0	5.76197e-05
	VFIDQCKSDPSLLTTPSLSFFRDYLESLGAK	4	1	1	AT4G22670.1	Q5(Deamidated); C6(Carbamidomethyl)	3535.79	0	4.8804e-05
	MGDSSVEVTDENREAAQEAKGK	8	1	1	AT4G22670.1		2351.08	0	9.87413e-08
	SFVVEESDDDMDETEEVKPK	5	1	1	AT4G22670.1	M11(Oxidation)	2344	0	1.50714e-05
	DLHLASTIDYDEEISAVLKKVEPNAHK	32	1	1	AT4G22670.1		3035.56	0	2.73581e-07
	SFVVEESDDDMDETEEVKPK	10	1	1	AT4G22670.1	S7(Phospho)	2407.97	0	7.73484e-08	109.439	0.999983	S(1): 0.0; S(7): 100.0; T(14): 0.0
	ILNDPELMTAFSDPEVMAALQDVMKNPANLAK	4	1	1	AT4G22670.1	Q21(Deamidated)	3487.73	0	1.81444e-05
	ILNDPELMTAFSDPEVMAALQDVMKNPANLAK	44	1	1	AT4G22670.1	M17(Oxidation); M24(Oxidation)	3518.71	0	3.6747e-05
	ILNDPELMTAFSDPEVMAALQDVMKNPANLAK	17	1	1	AT4G22670.1	M8(Oxidation); M17(Oxidation); M24(Oxidation)	3534.71	0	1.53904e-08
	MGDSSVEVTDENREAAQEAKGK	5	1	1	AT4G22670.1	M1(Oxidation)	2367.07	0	7.21962e-08
	DLHLASTIDYDEEISAVLK	44	1	1	AT4G22670.1		2132.07	0	0.00323586
	AMEALSEGNFDEAIEHLTRAITLNPTSAIMYGNR	4	1	1	AT4G22670.1	M2(Oxidation); M30(Oxidation)	3767.8	0	3.05368e-07
	ILNDPELMTAFSDPEVMAALQDVMKNPANLAKHQANPK	6	1	1	AT4G22670.1	M8(Oxidation); M17(Oxidation); M24(Oxidation)	4210.06	0	3.86475e-05
	AEAQAAYDKAK	12	1	1	AT4G22670.1		1165.58	0	0.000849437
	LSELKVFIDQCK	16	1	1	AT4G22670.1	C11(Carbamidomethyl)	1479.79	0	0.00168304
	DLHLASTIDYDEEISAVLKKVEPNAHK	2	1	1	AT4G22670.1	N24(Deamidated)	3036.56	0	0.000190117
	LSELKVFIDQCKSDPSLLTTPSLSFFR	4	1	1	AT4G22670.1	C11(Carbamidomethyl)	3128.63	0	0.000924409
	KVEPNAHKLEEHR	1	1	1	AT4G22670.1	N5(Deamidated)	1587.82	0	0.00166116
	GKAMEALSEGNFDEAIEHLTRAITLNPTSAIMYGNR	2	1	1	AT4G22670.1	M4(Oxidation); M32(Oxidation)	3952.93	0	7.90496e-07
	DYLESLGAK	24	1	1	AT4G22670.1		995.504	8.7e-05	0.000469599
	MMGKFAGPQ	6	1	1	AT4G22670.1	M1(Oxidation); M2(Oxidation)	998.442	0.000146	0.00244105
	VEPNAHKLEEHR	16	1	1	AT4G22670.1		1458.74	0.000186	0.000212504
	VEPNAHKLEEHRR	8	1	1	AT4G22670.1		1614.84	0.000186	0.00410428
	LSELKVFIDQCKSDPSLLTTPSLSFFR	2	1	1	AT4G22670.1	Q10(Deamidated); C11(Carbamidomethyl)	3129.63	0.000194	0.00151815
	ILNDPELMTAFSDPEVMAALQDVMKNPANLAK	6	1	1	AT4G22670.1	Q21(Deamidated); N29(Deamidated)	3488.72	0.000209	0.00161781
	ILNDPELMTAFSDPEVMAALQDVMKNPANLAKHQANPK	3	1	1	AT4G22670.1	M24(Oxidation)	4178.06	0.000243	0.00791464
	SDPSLLTTPSLSFFRDYLESLGAK	52	1	1	AT4G22670.1		2644.35	0.00026	0.00173131
	AMEALSEGNFDEAIEHLTRAITLNPTSAIMYGNR	4	1	1	AT4G22670.1		3735.79	0.000266	0.00308156
	AMEALSEGNFDEAIEHLTRAITLNPTSAIMYGNR	3	1	1	AT4G22670.1	N9(Deamidated); N33(Deamidated)	3737.79	0.000362	0.0163805
	EAAQEAKGKAMEALSEGNFDEAIEHLTR	1	1	1	AT4G22670.1	N18(Deamidated)	3046.46	0.000503	0.0276342
	MMGKFAGPQ	4	1	1	AT4G22670.1	M2(Oxidation)	982.446	0.000859	0.0113184
	MDSTKLSELK	4	1	1	AT4G22670.1	N-Term(Acetyl)	1193.61	0.000861	0.0118598
	IPTGVHEEDK	4	1	1	AT4G22670.1		1124.56	0.002873	0.0585611
	AMEALSEGNFDEAIEHLTRAITLNPTSAIMYGNR	1	1	1	AT4G22670.1	M2(Oxidation)	3751.79	0.00471	0.105171
	SRGMARAMLGEWAEAAK	4	1	1	AT4G22670.1		1834.91	0.4663	1
	ILNDPELMTAFSDPEVMAALQDVMKNPANLAKHQANPK	1	1	1	AT4G22670.1	M17(Oxidation); M24(Oxidation)	4194.06
AT1G01100.1	60S acidic ribosomal protein family	99.11	2	4	8	166
	Sequence	# PSMs	# Proteins	# Protein Groups	Protein Group Accessions	Modifications	MH+ [Da]	q-Value	PEP	pRS Score	pRS Probability	pRS Site Probabilities
	RNVTDLIMNVGAGGGGGAPVAAAAPAAGGGAAAAPAAEEK	20	1	1	AT1G01100.1		3458.75	0	1.74291e-09
	MAEKRNVTDLIMNVGAGGGGGAPVAAAAPAAGGGAAAAPAAEEK	28	1	1	AT1G01100.1		3917.95	0	3.32396e-07
	AAGVSIESYWPMLFAK	16	2	1	AT1G01100.1		1769.89	0	3.897e-05
	NVTDLIMNVGAGGGGGAPVAAAAPAAGGGAAAAPAAEEK	10	1	1	AT1G01100.1	M7(Oxidation)	3318.63	0	2.08286e-09
	NVTDLIMNVGAGGGGGAPVAAAAPAAGGGAAAAPAAEEK	32	1	1	AT1G01100.1		3302.64	0	8.13994e-07
	RNVTDLIMNVGAGGGGGAPVAAAAPAAGGGAAAAPAAEEK	2	1	1	AT1G01100.1	N9(Deamidated)	3459.74	0	1.42799e-07
	MAEKRNVTDLIMNVGAGGGGGAPVAAAAPAAGGGAAAAPAAEEK	6	1	1	AT1G01100.1	N6(Deamidated)	3918.96	0	1.09995e-06
	KKDEPAEESDGDLGFGLFD	29	3	2	AT1G01100.1;AT5G47700.1	S9(Phospho)	2148.9	0	0.000337345	200.255	1	S(9): 100.0
	RNVTDLIMNVGAGGGGGAPVAAAAPAAGGGAAAAPAAEEK	7	1	1	AT1G01100.1	M8(Oxidation)	3474.72	0	4.06956e-06
	MAEKRNVTDLIMNVGAGGGGGAPVAAAAPAAGGGAAAAPAAEEK	3	1	1	AT1G01100.1	M1(Oxidation); M12(Oxidation)	3949.93	0	3.14528e-07
	STVGELACSYAVMILEDEGIAITADKIATLVK	2	3	2	AT1G01100.1;AT5G47700.1	N-Term(Acetyl); C8(Carbamidomethyl)	3423.76	8.7e-05	0.00385806
	AAGVSIESYWPMLFAK	4	2	1	AT1G01100.1	M12(Oxidation)	1785.88	9.9e-05	0.000450992
	STVGELACSYAVMILEDEGIAITADK	1	3	2	AT1G01100.1;AT5G47700.1	N-Term(Acetyl); C8(Carbamidomethyl)	2798.33	0.000274	0.0055535
	KKDEPAEESDGDLGFGLFD	2	3	2	AT1G01100.1;AT5G47700.1		2068.93	0.000787	0.0118719
	MAEKRNVTDLIMNVGAGGGGGAPVAAAAPAAGGGAAAAPAAEEK	3	1	1	AT1G01100.1	M1(Oxidation)	3933.95	0.002018	0.0437177
	NVTDLIMNVGAGGGGGAPVAAAAPAAGGGAAAAPAAEEKK	1	1	1	AT1G01100.1	T3(Phospho)	3510.72	0.458596	0.956217	4.37429	1	T(3): 100.0
AT5G47700.1	60S acidic ribosomal protein family	99.12	1	4	8	106
	Sequence	# PSMs	# Proteins	# Protein Groups	Protein Group Accessions	Modifications	MH+ [Da]	q-Value	PEP	pRS Score	pRS Probability	pRS Site Probabilities
	RNVTDLIMNVGAGGGGGAPVAAAAPAAGGGAAAAAPAAEEK	20	1	1	AT5G47700.1		3529.78	0	3.55498e-10
	NVTDLIMNVGAGGGGGAPVAAAAPAAGGGAAAAAPAAEEK	8	1	1	AT5G47700.1		3373.67	0	9.40445e-05
	NVTDLIMNVGAGGGGGAPVAAAAPAAGGGAAAAAPAAEEK	7	1	1	AT5G47700.1	M7(Oxidation)	3389.67	0	3.63738e-06
	KKDEPAEESDGDLGFGLFD	29	3	2	AT1G01100.1;AT5G47700.1	S9(Phospho)	2148.9	0	0.000337345	200.255	1	S(9): 100.0
	RNVTDLIMNVGAGGGGGAPVAAAAPAAGGGAAAAAPAAEEK	6	1	1	AT5G47700.1	M8(Oxidation)	3545.76	0	1.09556e-09
	STVGELACSYAVMILEDEGIAITADKIATLVK	2	3	2	AT1G01100.1;AT5G47700.1	N-Term(Acetyl); C8(Carbamidomethyl)	3423.76	8.7e-05	0.00385806
	AAGVTIESYWPMLFAK	12	1	1	AT5G47700.1		1783.9	0.000192	0.00300426
	NVTDLIMNVGAGGGGGAPVAAAAPAAGGGAAAAAPAAEEK	4	1	1	AT5G47700.1	N8(Deamidated)	3374.68	0.000209	0.00276163
	STVGELACSYAVMILEDEGIAITADK	1	3	2	AT1G01100.1;AT5G47700.1	N-Term(Acetyl); C8(Carbamidomethyl)	2798.33	0.000274	0.0055535
	MAEKRNVTDLIMNVGAGGGGGAPVAAAAPAAGGGAAAAAPAAEEK	4	1	1	AT5G47700.1		3989.02	0.000445	0.00987298
	KKDEPAEESDGDLGFGLFD	2	3	2	AT1G01100.1;AT5G47700.1		2068.93	0.000787	0.0118719
	MAEKRNVTDLIMNVGAGGGGGAPVAAAAPAAGGGAAAAAPAAEEK	7	1	1	AT5G47700.1	M12(Oxidation)	4004.99	0.000965	0.0240239
	MAEKRNVTDLIMNVGAGGGGGAPVAAAAPAAGGGAAAAAPAAEEK	1	1	1	AT5G47700.1	M1(Oxidation); M12(Oxidation)	4020.99	0.008238	0.145993
	NVTDLIMNVGAGGGGGAPVAAAAPAAGGGAAAAAPAAEEKK	2	1	1	AT5G47700.1	M7(Oxidation)	3517.77
	NVTDLIMNVGAGGGGGAPVAAAAPAAGGGAAAAAPAAEEKK	1	1	1	AT5G47700.1	T3(Phospho)	3581.74			1.77957	1	T(3): 100.0
AT3G19420.1	PTEN 2	41.57	1	18	19	462
	Sequence	# PSMs	# Proteins	# Protein Groups	Protein Group Accessions	Modifications	MH+ [Da]	q-Value	PEP	pRS Score	pRS Probability	pRS Site Probabilities
	LSPKSPQTNDTTTEGTSSATESSFIGTITK	16	1	1	AT3G19420.1		3086.49	0	2.57446e-09
	VSISGNKGSSQPVQGVTVSK	36	1	1	AT3G19420.1		1959.05	0	2.10864e-09
	SAFAKFTSGLGIR	44	1	1	AT3G19420.1		1354.75	0	2.65238e-06
	SADETAVLTKATEK	40	1	1	AT3G19420.1		1463.76	0	4.91839e-08
	GEATEKPSGAGVNASSSSESEFK	32	1	1	AT3G19420.1		2256.02	0	9.81316e-06
	KSADETAVLTKATEK	36	1	1	AT3G19420.1		1591.85	0	1.46304e-08
	ATEKVSISGNKGSSQPVQGVTVSK	36	1	1	AT3G19420.1		2388.27	0	2.99792e-08
	NLKVPQPFASTQNDSGVENTEK	24	1	1	AT3G19420.1		2403.18	0	7.39202e-14
	GLVDTSKNAVKAVQVK	24	1	1	AT3G19420.1		1656.96	0	2.06054e-05
	VPQPFASTQNDSGVENTEK	4	1	1	AT3G19420.1		2047.95	0	1.96134e-08
	VSISGNKGSSQPVQGVTVSKGEATEKPSGAGVNASSSSESEFK	48	1	1	AT3G19420.1		4196.06	0	8.73318e-12
	TKDLSPEDFWFSAPK	4	1	1	AT3G19420.1		1767.86	0	3.92227e-07
	ETENPDKDDVFSDNEGDSTGPTKTTSSASSQTPEAK	61	1	1	AT3G19420.1	S12(Phospho)	3852.6	0	0.00101851	32.5447	0.810473	T(2): 2.1; S(12): 81.0; S(18): 4.6; T(19): 4.6; T(22): 4.6; T(24): 1.0; T(25): 1.0; S(26): 0.5; S(27): 0.3; S(29): 0.1; S(30): 0.1; T(32): 0.1
	LSPKSPQTNDTTTEGTSSATESSFIGTITK	6	1	1	AT3G19420.1	Q7(Deamidated)	3087.49	0	6.5058e-07
	TTSSASSQTPEAKKSADETAVLTK	8	1	1	AT3G19420.1		2438.23	0	1.5339e-07
	FTSGLGIR	24	1	1	AT3G19420.1		850.479	8.7e-05	0.00266292
	TPEETSAANSSPVDGSASVPGPDK	4	1	1	AT3G19420.1		2300.04	0.000141	0.00215245
	LYDVSLFEGK	8	1	1	AT3G19420.1		1170.6	0.000851	0.0132392
	KSADETAVLTK	4	1	1	AT3G19420.1		1162.63	0.019279	0.303906
	LSPKSPQTNDTTTEGTSSATESSFIGTITK	1	1	1	AT3G19420.1	T8(Phospho); T11(Phospho); T12(Phospho); T13(Phospho); T16(Phospho); S17(Phospho); S18(Phospho); T20(Phospho); S22(Phospho)	3806.18	0.497664	0.966647			Too many isoforms
	LPSPGFMVEVVLADINATIPTNPSSETASK	1	1	1	AT3G19420.1	T18(Phospho)	3165.53	0.610256	0.988513	0.5405	0.141836	S(3): 20.8; T(18): 14.2; T(21): 13.1; S(24): 13.1; S(25): 13.1; T(27): 13.1; S(29): 12.7
	GLVDTSKNAVKAVQVK	1	1	1	AT3G19420.1	N8(Deamidated); Q14(Deamidated)	1658.94
AT2G27720.1	60S acidic ribosomal protein family	100	3	12	18	659
	Sequence	# PSMs	# Proteins	# Protein Groups	Protein Group Accessions	Modifications	MH+ [Da]	q-Value	PEP	pRS Score	pRS Probability	pRS Site Probabilities
	LASVPSGGGGGVAVASATSGGGGGGGAPAAESK	80	3	1	AT2G27720.1		2598.27	0	1.05676e-11
	LASVPSGGGGGVAVASATSGGGGGGGAPAAESKKEEK	64	3	1	AT2G27720.1		3112.54	0	1.97394e-07
	EKLASVPSGGGGGVAVASATSGGGGGGGAPAAESKK	48	3	1	AT2G27720.1		2983.5	0	1.29909e-07
	ASPTTGDIKDILGSVGAETEDSQIELLLKEVK	44	1	1	AT2G27720.1		3356.76	0	4.19887e-10
	LASVPSGGGGGVAVASATSGGGGGGGAPAAESKK	64	3	1	AT2G27720.1		2726.37	0	4.51341e-05
	GKDLAELIAAGREK	52	5	2	AT2G27720.1;AT2G27710.1		1470.82	0	2.06554e-06
	EKLASVPSGGGGGVAVASATSGGGGGGGAPAAESK	32	3	1	AT2G27720.1		2855.41	0	1.32741e-08
	DLAELIAAGR	24	5	2	AT2G27720.1;AT2G27710.1		1028.57	0	3.62264e-06
	EVKGKDLAELIAAGR	40	5	2	AT2G27720.1;AT2G27710.1		1569.89	0	8.34841e-08
	ASPTTGDIKDILGSVGAETEDSQIELLLK	44	1	1	AT2G27720.1		3000.56	0	2.99211e-05
	MKVVAAFLLAVLSGKASPTTGDIK	20	3	1	AT2G27720.1		2417.39	0	1.57651e-06
	GKDLAELIAAGR	56	5	2	AT2G27720.1;AT2G27710.1		1213.69	0	1.37062e-05
	MKVVAAFLLAVLSGKASPTTGDIK	13	3	1	AT2G27720.1	M1(Oxidation)	2433.38	0	6.00675e-08
	MKVVAAFLLAVLSGK	2	3	1	AT2G27720.1	M1(Oxidation)	1562.93	0	5.47093e-05
	MKVVAAFLLAVLSGK	8	3	1	AT2G27720.1		1546.94	0	0.000172726
	DILGSVGAETEDSQIELLLKEVK	16	1	1	AT2G27720.1		2486.32	0	0.000377542
	ASPTTGDIKDILGSVGAETEDSQIELLLKEVK	2	1	1	AT2G27720.1	Q23(Deamidated)	3357.77	0	1.07568e-11
	KEEKEESDDDMGFSLFE	4	6	3	AT2G27720.1;AT2G27710.1;AT3G44590.2	S7(Phospho)	2114.81	0	1.90187e-06	135.972	1	S(7): 100.0; S(14): 0.0
	DILGSVGAETEDSQIELLLK	12	1	1	AT2G27720.1		2130.11	0	2.60518e-06
	ASPTTGDIKDILGSVGAETEDSQIELLLK	1	1	1	AT2G27720.1	Q23(Deamidated)	3001.55	0	0.000226499
	DLAELIAAGREK	28	5	2	AT2G27720.1;AT2G27710.1		1285.71	8.7e-05	0.00022285
	DLAELIAAGREKLASVPSGGGGGVAVASATSGGGGGGGAPAAESK	4	3	1	AT2G27720.1		3864.97	0.000146	0.000930934
	DILGSVGAETEDSQIELLLKEVK	1	1	1	AT2G27720.1	Q14(Deamidated)	2487.32	0.013496	0.269652
AT2G27710.1	60S acidic ribosomal protein family	100	2	12	18	889
	Sequence	# PSMs	# Proteins	# Protein Groups	Protein Group Accessions	Modifications	MH+ [Da]	q-Value	PEP	pRS Score	pRS Probability	pRS Site Probabilities
	LASVPSGGGGGVAVASATSGGGGGGGASAAESK	80	1	1	AT2G27710.1		2588.25	0	2.97243e-15
	EKLASVPSGGGGGVAVASATSGGGGGGGASAAESKK	80	1	1	AT2G27710.1		2973.48	0	3.00778e-15
	ASPTSADIKTILGSVGAETEDSQIELLLKEVK	48	2	1	AT2G27710.1		3342.79	0	6.45711e-07
	TILGSVGAETEDSQIELLLK	36	2	1	AT2G27710.1		2116.14	0	3.07735e-11
	GKDLAELIAAGREK	52	5	2	AT2G27720.1;AT2G27710.1		1470.82	0	2.06554e-06
	EKLASVPSGGGGGVAVASATSGGGGGGGASAAESK	48	1	1	AT2G27710.1		2845.39	0	4.48907e-06
	LASVPSGGGGGVAVASATSGGGGGGGASAAESKK	116	1	1	AT2G27710.1		2716.35	0	1.44007e-05
	LASVPSGGGGGVAVASATSGGGGGGGASAAESKKEEK	104	1	1	AT2G27710.1		3102.53	0	4.18453e-06
	DLAELIAAGR	24	5	2	AT2G27720.1;AT2G27710.1		1028.57	0	3.62264e-06
	EVKGKDLAELIAAGR	40	5	2	AT2G27720.1;AT2G27710.1		1569.89	0	8.34841e-08
	MKVVAAYLLAVLSGKASPTSADIK	52	2	1	AT2G27710.1		2433.37	0	1.10725e-08
	GKDLAELIAAGR	56	5	2	AT2G27720.1;AT2G27710.1		1213.69	0	1.37062e-05
	ASPTSADIKTILGSVGAETEDSQIELLLK	44	2	1	AT2G27710.1		2986.58	0	4.50508e-10
	MKVVAAYLLAVLSGK	8	2	1	AT2G27710.1		1562.93	0	7.08222e-05
	TILGSVGAETEDSQIELLLKEVK	32	2	1	AT2G27710.1		2472.34	0	1.67136e-06
	TILGSVGAETEDSQIELLLKEVKGK	16	2	1	AT2G27710.1		2657.46	0	1.02311e-05
	MKVVAAYLLAVLSGKASPTSADIK	10	2	1	AT2G27710.1	M1(Oxidation)	2449.38	0	7.93051e-13
	MKVVAAYLLAVLSGK	6	2	1	AT2G27710.1	M1(Oxidation)	1578.93	0	5.96473e-06
	KEEKEESDDDMGFSLFE	4	6	3	AT2G27720.1;AT2G27710.1;AT3G44590.2	S7(Phospho)	2114.81	0	1.90187e-06	135.972	1	S(7): 100.0; S(14): 0.0
	DLAELIAAGREK	28	5	2	AT2G27720.1;AT2G27710.1		1285.71	8.7e-05	0.00022285
	ASPTSADIKTILGSVGAETEDSQIELLLKEVK	1	2	1	AT2G27710.1	Q23(Deamidated)	3343.76	0.000251	0.00174907
	TILGSVGAETEDSQIELLLKEVKGK	1	2	1	AT2G27710.1	Q14(Deamidated)	2658.45	0.022884	0.346028
	LASVPSGGGGGVAVASATSGGGGGGGASAAESKK	2	1	1	AT2G27710.1	S6(Phospho)	2796.31	0.025881	0.425045	8.91405	0.139692	S(3): 73.7; S(6): 14.0; S(16): 2.9; T(18): 2.9; S(19): 2.9; S(28): 1.8; S(32): 1.8
	EKLASVPSGGGGGVAVASATSGGGGGGGASAAESK	1	1	1	AT2G27710.1	S21(Phospho)	2925.38	0.477657	1	5.27495	0.169742	S(5): 17.0; S(8): 17.0; S(18): 17.0; T(20): 17.0; S(21): 17.0; S(30): 7.6; S(34): 7.6
AT3G44590.2	60S acidic ribosomal protein family	55.86	1	2	5	51
	Sequence	# PSMs	# Proteins	# Protein Groups	Protein Group Accessions	Modifications	MH+ [Da]	q-Value	PEP	pRS Score	pRS Probability	pRS Site Probabilities
	LASVPSGGGVAVSAAPSSGGGGAAAPAEKK	36	1	1	AT3G44590.2		2508.3	0	1.4527e-08
	EKLASVPSGGGVAVSAAPSSGGGGAAAPAEKK	8	1	1	AT3G44590.2		2765.44	0	2.00764e-05
	KEEKEESDDDMGFSLFE	4	6	3	AT2G27720.1;AT2G27710.1;AT3G44590.2	S7(Phospho)	2114.81	0	1.90187e-06	135.972	1	S(7): 100.0; S(14): 0.0
	LASVPSGGGVAVSAAPSSGGGGAAAPAEKKEAK	2	1	1	AT3G44590.2	S3(Phospho); S13(Phospho); S18(Phospho)	3076.37	0.05688	0.664606	0.960499	0.0976335	S(3): 57.0; S(6): 57.0; S(13): 60.9; S(17): 62.5; S(18): 62.5
	DIAELIASGREKLASVPSGGGVAVSAAPSSGGGGAAAPAEK	1	1	1	AT3G44590.2	S8(Phospho); S30(Phospho)	3822.81	0.562279	1	2.41082e-14	0.0571919	S(8): 40.6; S(15): 40.6; S(18): 32.9; S(25): 28.6; S(29): 28.6; S(30): 28.6
AT3G43300.2	HOPM interactor 7	17.2	2	19	21	401
	Sequence	# PSMs	# Proteins	# Protein Groups	Protein Group Accessions	Modifications	MH+ [Da]	q-Value	PEP	pRS Score	pRS Probability	pRS Site Probabilities
	AIQAYQDGSKVVTQAAPSSIVESSQAEGGGEK	32	2	1	AT3G43300.2		3192.56	0	8.3564e-11
	TGVEADEPQKVTSAEVAQQASQSK	24	2	1	AT3G43300.2		2488.22	0	6.33473e-06
	DTTLASVEELHTLVGGADIKGLEAALDK	20	2	1	AT3G43300.2		2866.51	0	2.84356e-07
	EMTLGDALTQAK	12	2	1	AT3G43300.2		1277.64	0	0.000112513
	FMDNLFLR	8	2	1	AT3G43300.2		1055.53	0	4.79653e-05
	NPASVAQFLR	24	2	1	AT3G43300.2		1102.6	0	8.39098e-06
	GGLVSILNLGLPKR	24	2	1	AT3G43300.2		1436.89	0	5.89733e-06
	NSVKGVEYLIANKLVER	20	2	1	AT3G43300.2		1932.1	0	1.73386e-05
	GGLVSILNLGLPK	24	2	1	AT3G43300.2		1280.79	0	0.000102619
	IGTHGTSLESGIPPKADGSEGRPSSSGR	56	2	1	AT3G43300.2		2737.35	0	5.65209e-07
	SSVAEVTVPSSPYKHEDPTEPDSR	36	2	1	AT3G43300.2		2614.22	0	5.62786e-06
	AKAHKSTMEAAISEFNR	16	2	1	AT3G43300.2		1890.95	0	8.18001e-05
	SSVAEVTVPSSPYKHEDPTEPDSR	35	2	1	AT3G43300.2	S11(Phospho)	2694.2	0	2.40153e-06	40.4217	0.300341	S(1): 3.3; S(2): 3.3; T(7): 30.0; S(10): 30.0; S(11): 30.0; Y(13): 3.3; T(19): 0.1; S(23): 0.0
	AKAHKSTMEAAISEFNR	5	2	1	AT3G43300.2	M8(Oxidation)	1906.94	0	5.29935e-06
	GGLVSILNLGLPKRISAADAK	32	2	1	AT3G43300.2		2093.24	8.7e-05	0.000151297
	VVTQAAPSSIVESSQAEGGGEKTGVEADEPQKVTSAEVAQQASQSK	3	2	1	AT3G43300.2	Q4(Deamidated); Q15(Deamidated)	4602.24	0.0001	0.00385162
	EMTLGDALTQAK	5	2	1	AT3G43300.2	M2(Oxidation)	1293.63	0.000146	0.00333945
	MGMKEDSDEVTTKTR	1	2	1	AT3G43300.2	M1(Oxidation); M3(Oxidation)	1759.78	0.000182	7.67697e-05
	RGIELESMSIGQR	4	2	1	AT3G43300.2		1475.76	0.000192	0.00258585
	FMDNLFLR	2	2	1	AT3G43300.2	M2(Oxidation)	1071.53	0.000254	0.00196142
	FMDNLFLRNLTSQPK	2	2	1	AT3G43300.2	M2(Oxidation)	1839.94	0.000274	0.00124316
	SQTFGQRFMDNLFLR	8	2	1	AT3G43300.2		1859.92	0.000468	0.0124859
	GVEYLIANKLVER	4	2	1	AT3G43300.2		1503.85	0.001072	0.027848
	YWSNLKTPQK	3	2	1	AT3G43300.2	S3(Phospho)	1344.64			5.9863	0.444053	Y(1): 44.4; S(3): 44.4; T(7): 11.2
	ILFPIFDHVSHAGKESLISSGDVK	1	2	1	AT3G43300.2	S10(Phospho)	2676.33			15.9167	0.824515	S(10): 82.5; S(16): 5.8; S(19): 5.8; S(20): 5.8
AT1G21380.1	Target of Myb protein 1	38.93	1	8	11	289
	Sequence	# PSMs	# Proteins	# Protein Groups	Protein Group Accessions	Modifications	MH+ [Da]	q-Value	PEP	pRS Score	pRS Probability	pRS Site Probabilities
	ILSLLDTWQEAFGGSGGRFPQYYNAYNELR	20	1	1	AT1G21380.1		3465.71	0	1.23625e-11
	NLSLNPTASAAPVTPPKKDDKPEDILFK	36	1	1	AT1G21380.1		3006.61	0	6.92491e-06
	TNKRPEYFQHNVPQHSSSASESSYDDLLGQSR	76	1	1	AT1G21380.1		3664.69	0	9.81306e-08
	IVKKKPDLTVR	20	1	1	AT1G21380.1		1296.83	0	2.64457e-05
	EKILSLLDTWQEAFGGSGGRFPQYYNAYNELR	8	1	1	AT1G21380.1		3722.82	0	1.637e-10
	TNKRPEYFQHNVPQHSSSASESSYDDLLGQSR	20	1	1	AT1G21380.1	Q9(Deamidated)	3665.69	0	9.34366e-06
	TNKRPEYFQHNVPQHSSSASESSYDDLLGQSR	20	1	1	AT1G21380.1	N11(Deamidated); Q14(Deamidated)	3666.69	0	2.68199e-05
	ILSLLDTWQEAFGGSGGRFPQYYNAYNELR	18	1	1	AT1G21380.1	Q9(Deamidated); N27(Deamidated)	3467.66	0	7.36965e-05
	SPEHALFTKPVYDQTEQLPPAPWETQEPR	8	1	1	AT1G21380.1		3391.68	0	1.40593e-06
	SPEHALFTKPVYDQTEQLPPAPWETQEPR	28	1	1	AT1G21380.1	S1(Phospho)	3471.62	0	1.77592e-05	62.3737	0.977363	S(1): 97.7; T(8): 1.1; Y(12): 1.1; T(15): 0.0; T(25): 0.0
	EKILSLLDTWQEAFGGSGGRFPQYYNAYNELR	4	1	1	AT1G21380.1	Q23(Deamidated)	3723.83	0	8.5564e-06
	NLSLNPTASAAPVTPPKKDDKPEDILFK	2	1	1	AT1G21380.1	N5(Deamidated)	3007.61	0.000209	0.00228709
	EKILSLLDTWQEAFGGSGGRFPQYYNAYNELR	6	1	1	AT1G21380.1	Q11(Deamidated); N26(Deamidated)	3724.81	0.000875	0.0244266
	TRTSSSSSSKPNNQNNKPF	12	1	1	AT1G21380.1		2080.99	0.001002	0.0210545
	DLMDFAK	4	1	1	AT1G21380.1		839.396	0.002209	0.0364194
	KYPPSMSAR	1	1	1	AT1G21380.1	M6(Oxidation)	1052.52	0.183616	0.995616
	NSKVQILALYALETLSK	1	2	2	AT1G21380.1;AT1G76970.1	S16(Phospho)	1971.05	0.330938	0.956217	14.5866	0.829046	S(2): 3.4; Y(10): 3.4; T(14): 10.3; S(16): 82.9
	NSKVQILALYALETLSKNCGESVYQLIVDR	4	1	1	AT1G21380.1	Q5(Deamidated); N18(Deamidated); C19(Carbamidomethyl); Q25(Deamidated)	3427.77	0.400171	1
	TNKRPEYFQHNVPQHSSSASESSYDDLLGQSR	1	1	1	AT1G21380.1	Q9(Deamidated); N11(Deamidated); Q14(Deamidated)	3667.68	0.644842	1
AT2G07360.1	SH3 domain-containing protein	15.89	2	6	8	124
	Sequence	# PSMs	# Proteins	# Protein Groups	Protein Group Accessions	Modifications	MH+ [Da]	q-Value	PEP	pRS Score	pRS Probability	pRS Site Probabilities
	SSQKQLVNHVFPK	21	2	1	AT2G07360.1		1511.83	0	1.44792e-05
	SGGSKYQSTYEGYGSPIREEPPPPYSYSEPQSR	62	2	1	AT2G07360.1	S15(Phospho)	3760.64	0	0.000244446	50.285	0.688691	S(1): 0.0; S(4): 0.0; Y(6): 0.1; S(8): 0.7; T(9): 3.0; Y(10): 13.6; Y(13): 13.6; S(15): 68.9; Y(25): 0.1; S(26): 0.1; Y(27): 0.0; S(28): 0.0; S(32): 0.0
	QKKKPVSYSQLAR	8	2	1	AT2G07360.1		1532.89	8.7e-05	0.00274732
	SGGSKYQSTYEGYGSPIR	12	2	1	AT2G07360.1		1936.9	0.000146	0.00274324
	IVNQLTNEATNSEFEFHAR	4	2	1	AT2G07360.1		2220.07	0.000192	0.000614107
	YVYYYLARILSDTGMTPGGGIPTPNWDALADIDAGGGVTR	12	2	1	AT2G07360.1	Y1(Phospho); Y3(Phospho); S11(Phospho); T39(Phospho)	4536.93	0.032165	0.421632	1.08487e-13	0.00793651	Y(1): 44.4; Y(3): 44.4; Y(4): 44.4; Y(5): 44.4; S(11): 44.4; T(13): 44.4; T(16): 44.4; T(23): 44.4; T(39): 44.4
	SDTIASLLAALMEVVRTTVACECVYVRAMVIK	1	2	1	AT2G07360.1	C21(Carbamidomethyl); C23(Carbamidomethyl); M29(Oxidation)	3585.83	0.388039	1
	TCLVGAGPDGKHTALEAVTIVLDLPPPQPGSMAGLTSIDR	3	2	1	AT2G07360.1	T1(Phospho); C2(Carbamidomethyl); S31(Phospho)	4215.05	0.652668	1	1.08487e-13	0.0666667	T(1): 33.3; T(13): 33.3; T(19): 33.3; S(31): 33.3; T(36): 33.3; S(37): 33.3
	QKKKPVSYSQLAR	1	2	1	AT2G07360.1	Y8(Phospho)	1612.85			44.6134	0.886307	S(7): 5.7; Y(8): 88.6; S(9): 5.7
AT4G02510.1	translocon at the outer envelope membrane of chloroplasts 159	35.93	1	38	41	522
	Sequence	# PSMs	# Proteins	# Protein Groups	Protein Group Accessions	Modifications	MH+ [Da]	q-Value	PEP	pRS Score	pRS Probability	pRS Site Probabilities
	VGSVDAEEDSIPAAESQFEVR	48	1	1	AT4G02510.1		2235.04	0	7.31503e-08
	MFDTAALAALLK	16	1	1	AT4G02510.1		1264.7	0	1.26616e-07
	VGVEVEELPVSESLKVGSVDAEEDSIPAAESQFEVR	28	1	1	AT4G02510.1		3829.87	0	2.86e-07
	ASSGIEAHSDEANISNNMSDR	6	1	1	AT4G02510.1	M18(Oxidation)	2220.94	0	3.05663e-11
	VGVEVEELPVSESLK	16	1	1	AT4G02510.1		1613.86	0	6.45618e-06
	KVVEGDSAEEDENKLPVEDIVSSR	72	1	1	AT4G02510.1		2644.29	0	5.48853e-08
	ASSGIEAHSDEANISNNMSDR	8	1	1	AT4G02510.1		2204.94	0	6.53099e-06
	HGENGSTMAGFDIQNVGKQLAYVVR	4	1	1	AT4G02510.1		2691.33	0	1.79972e-06
	VKEDVEDIKDDGESK	16	1	1	AT4G02510.1		1705.81	0	0.000388191
	IENGSVDVDVKQASTDGESESK	16	1	1	AT4G02510.1		2294.06	0	7.79461e-07
	IENGSVDVDVKQASTDGESESKVK	20	1	1	AT4G02510.1		2521.22	0	1.36103e-08
	VVEGDSAEEDENKLPVEDIVSSR	32	1	1	AT4G02510.1		2516.2	0	3.38303e-07
	SPPLPYLLSWLLQSR	8	1	1	AT4G02510.1		1769.99	0	0.000606828
	VKDVEEEDVGTKK	8	1	1	AT4G02510.1		1475.75	0	0.000410937
	VGVEVEELPVSESLKVGSVDAEEDSIPAAESQFEVRK	1	1	1	AT4G02510.1	Q32(Deamidated)	3958.98	0	5.89714e-05
	ELDSSSEAVSGNSDKVGADDLSDSEK	12	1	1	AT4G02510.1		2641.16	0	7.44295e-08
	EISEAAKVEPDEPK	4	1	1	AT4G02510.1		1541.76	0	6.84695e-06
	EAVIKEDDKDDEVDK	12	1	1	AT4G02510.1		1747.82	0	0.000201459
	KVVEGDSAEEDENKLPVEDIVSSR	6	1	1	AT4G02510.1	S7(Phospho)	2724.26	0	0.000193086	88.5661	1	S(7): 100.0; S(22): 0.0; S(23): 0.0
	ELDSSSEAVSGNSDKVGADDLSDSEK	1	1	1	AT4G02510.1	N12(Deamidated)	2642.14	0	3.63654e-06
	LESVDTSAVEPEVVAAESGSEPK	8	1	1	AT4G02510.1		2330.12	0	0.000234806
	MFDTAALAALLK	2	1	1	AT4G02510.1	M1(Oxidation)	1280.69	0	7.61664e-08
	SVTPEPTNPFYASSGQSGK	4	1	1	AT4G02510.1		1953.92	0	0.00186857
	FTSESDSIADSSKLESVDTSAVEPEVVAAESGSEPK	8	1	1	AT4G02510.1		3684.7	0	0.00107259
	KAYFEEYDYRVK	16	1	1	AT4G02510.1		1610.78	0	4.46868e-07
	LFSMDRPAGLSSSLRPLKPAAAPR	5	1	1	AT4G02510.1	M4(Oxidation)	2554.39	0	2.66356e-05
	SVTPEPTNPFYASSGQSGKTYASVVAAAAAAAADKEDGGAVSSAK	8	1	1	AT4G02510.1		4287.07	0	0.000859078
	VGVEVEELPVSESLKVGSVDAEEDSIPAAESQFEVR	2	1	1	AT4G02510.1	Q32(Deamidated)	3830.89	0	8.35725e-06
	ANRSNIFSNSNVTMADETEINLSEEEK	2	1	1	AT4G02510.1	M14(Oxidation)	3058.39	0	1.20793e-09
	ATEEGGGKLVSEGDSMVDSSVVDSVDADINVAEPGVVVVGAAK	1	1	1	AT4G02510.1	M16(Oxidation)	4175	0	1.18307e-06
	EDVEDIKDDGESKIENGSVDVDVK	4	1	1	AT4G02510.1		2634.23	0	1.10702e-05
	DKKEFNIHLDSSVSAK	12	1	1	AT4G02510.1		1817.94	0	5.97028e-05
	HGENGSTMAGFDIQNVGKQLAYVVR	2	1	1	AT4G02510.1	M8(Oxidation)	2707.32	0	3.44046e-07
	SQGDSAYGANLEVR	8	1	1	AT4G02510.1		1466.69	0	3.45349e-05
	KAYFEEYDYR	24	1	1	AT4G02510.1		1383.62	8.7e-05	0.0023939
	QFLAELEK	8	1	1	AT4G02510.1		977.531	0.000146	0.000905258
	VGSVDAEEDSIPAAESQFEVRK	4	1	1	AT4G02510.1		2363.14	0.000146	0.000584825
	LESVDTSAVEPEVVAAESGSEPKDVEK	4	1	1	AT4G02510.1		2801.37	0.000146	0.000981253
	DVEEEDVGTKKDDEGESELGGK	4	1	1	AT4G02510.1		2365.05	0.000146	0.00178544
	TYASVVAAAAAAAADKEDGGAVSSAK	8	1	1	AT4G02510.1		2352.17	0.000146	0.00042775
	EFSFGGKEVDQEPSGEGVTR	8	1	1	AT4G02510.1		2154.99	0.000164	0.00546944
	SVTPEPTNPFYASSGQSGKTYASVVAAAAAAAADKEDGGAVSSAK	4	1	1	AT4G02510.1	Q16(Deamidated)	4288.06	0.000194	0.00206062
	AYFEEYDYRVK	12	1	1	AT4G02510.1		1482.69	0.000254	0.000676538
	EFNIHLDSSVSAK	12	1	1	AT4G02510.1		1446.72	0.001063	0.0201921
	GMTYAEVIK	8	1	1	AT4G02510.1		1011.52	0.005488	0.109821
	IENGSVDVDVKQASTDGESESKVK	1	1	1	AT4G02510.1	N3(Deamidated); Q12(Deamidated)	2523.18	0.070293	0.718617
	ELDSSSEAVSGNSDKVGADDLSDSEKEKPNLVGDGK	1	1	1	AT4G02510.1	S24(Phospho)	3758.68	0.111969	0.728924	0.5046	0.151749	S(4): 14.2; S(5): 14.2; S(6): 14.2; S(10): 13.8; S(13): 14.2; S(22): 14.2; S(24): 15.2
	VKDVEEEDVGTK	4	1	1	AT4G02510.1		1347.67
	TSSSDQLQIALTAILPIAMSIYK	4	1	1	AT4G02510.1	S2(Phospho); T12(Phospho)	2624.29			9.8914	0.0805022	T(1): 43.7; S(2): 43.7; S(3): 33.9; S(4): 33.9; T(12): 34.1; S(20): 5.3; Y(22): 5.3
AT5G55210.1	unknown protein; FUNCTIONS IN: molecular_function unknown; INVOLVED IN: biological_process unknown; LOCATED IN: chloroplast; EXPRESSED IN: 23 plant structures; EXPRESSED DURING: 13 growth stages; BEST Arabidopsis thaliana protein match is: unknown protein (TAIR:AT4G22320.1); Has 1807 Blast hits to 1807 proteins in 277 species: Archae - 0; Bacteria - 0; Metazoa - 736; Fungi - 347; Plants - 385; Vi…	20.24	1	2	2	13
	Sequence	# PSMs	# Proteins	# Protein Groups	Protein Group Accessions	Modifications	MH+ [Da]	q-Value	PEP	pRS Score	pRS Probability	pRS Site Probabilities
	YAPIAMLEHR	8	1	1	AT5G55210.1		1200.62	0	0.000221158
	EKVISKDSEIEETEEFDTESPLPK	5	1	1	AT5G55210.1	S20(Phospho)	2859.3	0	0.00161314	40.4217	0.89888	S(5): 0.0; S(8): 0.0; T(13): 0.2; T(18): 9.8; S(20): 89.9
AT2G17410.2	ARID/BRIGHT DNA-binding domain-containing protein	18.72	2	7	8	76
	Sequence	# PSMs	# Proteins	# Protein Groups	Protein Group Accessions	Modifications	MH+ [Da]	q-Value	PEP	pRS Score	pRS Probability	pRS Site Probabilities
	GSGDLNNGVHKIVR	24	2	1	AT2G17410.2		1465.79	0	4.07687e-05
	VPGPYVASSNIKSEAR	16	2	1	AT2G17410.2		1674.88	0	0.00129559
	HSEENQSPHHHANNVMEQDQAAEER	3	2	1	AT2G17410.2	M16(Oxidation)	2940.22	0	3.62131e-05
	LSEDTGSPHHHADILMVQEK	9	2	1	AT2G17410.2	S7(Phospho)	2324.03	0.00013	0.00123792	22.0363	0.127511	S(2): 12.8; T(5): 74.5; S(7): 12.8
	GSGDLNNGVHKIVRTPPVFDGTMR	1	2	1	AT2G17410.2	M23(Oxidation)	2583.31	0.000146	0.000335691
	VEQGTDKEIGSGEKR	20	2	1	AT2G17410.2		1632.82	0.000266	0.00482751
	LEDRPSEHLSETSMNVEK	1	2	1	AT2G17410.2	M14(Oxidation)	2116.97	0.00059	0.00404471
	VSEGELQIPLPLELEPMNIDNQASGSGR	2	2	1	AT2G17410.2	S2(Phospho); S26(Phospho)	3153.42	0.387901	0.966647	0.377106	0.218757	S(2): 43.8; S(24): 78.1; S(26): 78.1
AT1G21080.3	DNAJ heat shock N-terminal domain-containing protein	15.5	3	2	4	77
	Sequence	# PSMs	# Proteins	# Protein Groups	Protein Group Accessions	Modifications	MH+ [Da]	q-Value	PEP	pRS Score	pRS Probability	pRS Site Probabilities
	AELHKLNGNGQEHDHSSTSPKSDEASR	16	3	1	AT1G21080.3		2931.34	0	3.42728e-05
	AELHKLNGNGQEHDHSSTSPK	18	3	1	AT1G21080.3		2286.08	0	2.5478e-05
	AELHKLNGNGQEHDHSSTSPKSDEASR	3	3	1	AT1G21080.3	N7(Deamidated)	2932.35	0	0.000515687
	AELHKLNGNGQEHDHSSTSPKSDEASR	35	3	1	AT1G21080.3	S19(Phospho)	3011.32	0.00013	0.00116594	19.3135	0.165077	S(16): 46.2; S(17): 16.5; T(18): 16.5; S(19): 16.5; S(22): 2.9; S(26): 1.4
	STVGPQPEVETVSLVEPQSPYVEAPK	1	1	1	AT1G21080.3	S13(Phospho); Y21(Phospho)	2927.35	0.681089	1	11.0639	0.267012	S(1): 14.4; T(2): 14.4; T(11): 27.5; S(13): 47.7; S(19): 36.8; Y(21): 59.3
	QAAKELGKK	4	3	1	AT1G21080.3		972.587
AT4G25890.1	60S acidic ribosomal protein family	21.85	1	1	2	43
	Sequence	# PSMs	# Proteins	# Protein Groups	Protein Group Accessions	Modifications	MH+ [Da]	q-Value	PEP	pRS Score	pRS Probability	pRS Site Probabilities
	KKEESEEEEGDFGFDLFG	19	3	2	AT4G25890.1;AT5G57290.3	S5(Phospho)	2171.87	0.00013	0.000336983	85.3675	1	S(5): 100.0
	GVFTFVCK	24	1	1	AT4G25890.1	C7(Carbamidomethyl)	957.486	0.000468	0.0120979
AT5G57290.3	60S acidic ribosomal protein family	45.38	3	5	6	214
	Sequence	# PSMs	# Proteins	# Protein Groups	Protein Group Accessions	Modifications	MH+ [Da]	q-Value	PEP	pRS Score	pRS Probability	pRS Site Probabilities
	GGEWTAKQHEGDLEASASSTYDLQR	92	3	1	AT5G57290.3		2736.26	0	5.56023e-05
	SKGGEWTAKQHEGDLEASASSTYDLQR	20	3	1	AT5G57290.3		2951.38	0	1.09903e-10
	GGEWTAKQHEGDLEASASSTYDLQRK	24	3	1	AT5G57290.3		2864.33	0	2.37542e-09
	GVFSFVCK	40	3	1	AT5G57290.3	C7(Carbamidomethyl)	943.471	0.0001	0.00541094
	KKEESEEEEGDFGFDLFG	19	3	2	AT4G25890.1;AT5G57290.3	S5(Phospho)	2171.87	0.00013	0.000336983	85.3675	1	S(5): 100.0
	GVFSFVCKSK	16	3	1	AT5G57290.3	C7(Carbamidomethyl)	1158.6	0.000164	0.0052
	SKGGEWTAKQHEGDLEASASSTYDLQR	1	3	1	AT5G57290.3	Q10(Deamidated)	2952.37	0.021888	0.386691
	GGEWTAKQHEGDLEASASSTYDLQR	2	3	1	AT5G57290.3	Q24(Deamidated)	2737.25	0.360137	0.935786
AT5G40450.1	unknown protein; FUNCTIONS IN: molecular_function unknown; INVOLVED IN: biological_process unknown; LOCATED IN: chloroplast, plasma membrane; EXPRESSED IN: 24 plant structures; EXPRESSED DURING: 13 growth stages; Has 30201 Blast hits to 17322 proteins in 780 species: Archae - 12; Bacteria - 1396; Metazoa - 17338; Fungi - 3422; Plants - 5037; Viruses - 0; Other Eukaryotes - 2996 (source: NCBI BLin…	70.37	1	179	183	3736
	Sequence	# PSMs	# Proteins	# Protein Groups	Protein Group Accessions	Modifications	MH+ [Da]	q-Value	PEP	pRS Score	pRS Probability	pRS Site Probabilities
	NLPVETSDADNTLSSQLVSETK	44	1	1	AT5G40450.1		2348.15	0	2.14563e-11
	VLDDIQENSNTEAVTNFADR	56	1	1	AT5G40450.1		2251.04	0	2.61296e-10
	NAEPVEATQNLDDAEQISR	28	1	1	AT5G40450.1		2099.98	0	1.47876e-08
	EINQESFNNVKETDDAIDKTQPEIR	48	1	1	AT5G40450.1		2933.41	0	6.04867e-06
	EEGSYGLDTKDEAVSVLESR	48	1	1	AT5G40450.1		2184.03	0	1.04257e-08
	HSLEQEEDIGNISK	36	1	1	AT5G40450.1		1598.76	0	1.08917e-07
	SVTDLTPLQEESSQPNEQEK	32	1	1	AT5G40450.1		2259.06	0	7.9673e-07
	YQGNEPETVLVSNTGSYEK	16	1	1	AT5G40450.1		2114.98	0	6.41137e-08
	DAHVETPTAPIILEENDSETLIAEAK	36	1	1	AT5G40450.1		2806.4	0	3.50317e-05
	EEVPHNALENEEEMNEVVASEK	20	1	1	AT5G40450.1		2526.13	0	2.06703e-10
	DIGPSLTEICSINQNQPEEQVK	52	1	1	AT5G40450.1	C10(Carbamidomethyl)	2499.19	0	0.000543581
	AEAVDTSTVEEAAILK	24	1	1	AT5G40450.1		1646.85	0	2.60938e-06
	DIESLSSVSKTQDKPEPEYEVPNQQKR	96	1	1	AT5G40450.1		3131.55	0	2.93743e-07
	NGDNTVNETVSEDQTATDGEPLHDVETIKR	36	1	1	AT5G40450.1		3284.51	0	1.68809e-08
	IVNNEETTAHESESLKGDNHQEK	64	1	1	AT5G40450.1		2609.21	0	2.10341e-12
	IEDKPKEEVTLHQEGR	48	1	1	AT5G40450.1		1907.98	0	2.23604e-09
	ELEVGNDFVSRDGEK	40	1	1	AT5G40450.1		1693.8	0	5.5453e-07
	AINDSASSEVSMIKEPADQEEK	28	1	1	AT5G40450.1		2378.1	0	1.30942e-06
	EEVDQSSKDTEEHEHVLER	32	1	1	AT5G40450.1		2296.03	0	1.80239e-09
	SSEAEDDKPDEHVDSSTSPMLSEK	20	1	1	AT5G40450.1		2620.12	0	3.06857e-08
	SSEAEDDKPDEHVDSSTSPMLSEKNDNETQTSK	9	1	1	AT5G40450.1	M20(Oxidation)	3653.55	0	1.21433e-07
	EETVSVPESIELEEQPQEER	56	1	1	AT5G40450.1		2357.09	0	1.93388e-08
	DEESENTKDLFSVVK	48	1	1	AT5G40450.1		1739.84	0	1.02553e-09
	HEVSVEEKNNTSENIDHEAAK	24	1	1	AT5G40450.1		2380.09	0	5.81637e-09
	EEVDHISNETEEHEHVLER	40	1	1	AT5G40450.1		2331.05	0	2.66369e-07
	SSEAEDDKPDEHVDSSTSPMLSEKNDNETQTSK	20	1	1	AT5G40450.1		3637.55	0	2.9742e-07
	TNINESEAHSAIGGEEDGQETK	20	1	1	AT5G40450.1		2316.02	0	4.61204e-10
	ESSDEALVSMLASR	8	1	1	AT5G40450.1		1494.7	0	0.000518087
	VGETKPKESQAEGAEKSDDQVEDESTK	40	1	1	AT5G40450.1		2921.34	0	2.10178e-08
	DEAVSVLESR	24	1	1	AT5G40450.1		1104.55	0	0.00107128
	EEDIAPKTEEIQERPSESK	28	1	1	AT5G40450.1		2215.07	0	1.46011e-07
	SQETVQDENTEDKHDVLK	24	1	1	AT5G40450.1		2114.98	0	1.12909e-06
	IGEEQVADKIQK	36	1	1	AT5G40450.1		1357.73	0	4.31778e-05
	SVIDPTPLQKPTLESPSEVLEESSK	24	1	1	AT5G40450.1		2710.41	0	7.81371e-05
	EAEPFYKTVVEDAKIVNTEETTAHESK	24	1	1	AT5G40450.1		3065.5	0	2.49756e-07
	KGDDVVESNEKDFVSDILEAK	56	1	1	AT5G40450.1		2337.15	0	2.22944e-08
	SISVETEESVGETKPKEHEDEIR	28	1	1	AT5G40450.1		2628.26	0	3.03315e-06
	DVPVPQSETLVTEAK	28	1	1	AT5G40450.1		1612.84	0	0.000410451
	LEETKDEKSQEIPETAK	40	1	1	AT5G40450.1		1974.98	0	1.83042e-05
	EVEHVKAEMEDAIKHEVSVEEK	32	1	1	AT5G40450.1		2565.24	0	3.78016e-07
	NNTSENIDHEAAK	36	1	1	AT5G40450.1		1442.65	0	8.75489e-06
	ASEAEHEDPVDDIKSNDDR	20	1	1	AT5G40450.1		2141.92	0	3.38723e-07
	ILKEDNHQEEYAESVEATKNSDAAEQSSR	12	1	1	AT5G40450.1		3278.5	0	3.4447e-09
	SGEAEKIKEESGLAGK	40	1	1	AT5G40450.1		1632.84	0	3.20759e-05
	NSDGTEQISREVTVDRAK	24	1	1	AT5G40450.1		2004.99	0	7.23911e-06
	EEILISSSPLSAEEQEHVISDEKQEER	48	1	1	AT5G40450.1		3111.49	0	5.11116e-08
	EEVTLHQEGR	16	1	1	AT5G40450.1		1197.58	0	5.38325e-05
	TQDKPEPEYEVPNQQKR	44	1	1	AT5G40450.1		2086.02	0	2.79067e-05
	GLDIAETTHLSLPSVDQKEDVDEIHIPSVALPLDEQEK	28	1	1	AT5G40450.1		4181.1	0	2.4567e-06
	EEDIAPKTEEIQERPSESKASLEPK	40	1	1	AT5G40450.1		2840.41	0	1.35595e-06
	TVALDHEEEFVNHEAPK	28	1	1	AT5G40450.1		1964.93	0	1.04273e-06
	EIEQEEGKQTNIVKEEIR	32	1	1	AT5G40450.1		2172.11	0	8.62917e-06
	SQETVQDENTEDKHDVLKVPSTESEK	32	1	1	AT5G40450.1		2972.39	0	2.32922e-06
	SEKSPSDLVLNVDKEELNDEK	32	1	1	AT5G40450.1		2388.17	0	1.04526e-07
	DFVSDILEAK	32	1	1	AT5G40450.1		1136.58	0	1.31343e-05
	SSAVQEEQFGEHTEPCSSEIK	8	1	1	AT5G40450.1	C16(Carbamidomethyl)	2379.03	0	0.000331618
	ELGEQPQQEELCLANEQENETK	28	1	1	AT5G40450.1	C12(Carbamidomethyl)	2616.17	0	3.3668e-07
	SFETGEIVEAHSSLPSSSEEK	24	1	1	AT5G40450.1		2250.04	0	0.00030094
	YQENEPDISLVSK	20	1	1	AT5G40450.1		1521.74	0	4.48194e-05
	ENAEPVEAVKNSDGTEQISR	16	1	1	AT5G40450.1		2173.04	0	7.66091e-05
	IEEKTDSIELGEIAQEER	12	1	1	AT5G40450.1		2089.03	0	2.06631e-05
	IGEEQVADKIQKSFETGEIVEAHSSLPSSSEEK	20	1	1	AT5G40450.1		3588.77	0	2.696e-07
	AEMEDAIKHEVSVEEKNNTSENIDHEAAK	12	1	1	AT5G40450.1		3267.51	0	1.82511e-10
	GLDIAETTHLSLPSVDQK	28	1	1	AT5G40450.1		1924	0	1.36045e-05
	NSDGTEQISREVTVDR	24	1	1	AT5G40450.1		1805.86	0	2.89207e-05
	HSLEQEEDIGNISKVCEEIPIKTDEVR	16	1	1	AT5G40450.1	C16(Carbamidomethyl)	3167.55	0	2.39956e-07
	ASLDHEEEMDKITK	8	1	1	AT5G40450.1		1645.77	0	0.000477135
	AINDSASSEVSMIKEPADQEEK	5	1	1	AT5G40450.1	M12(Oxidation)	2394.09	0	1.18894e-05
	KDEESENTKDLFSVVK	24	1	1	AT5G40450.1		1867.93	0	3.33976e-06
	EEILISSSPLSAEEQEHVISDEK	32	1	1	AT5G40450.1		2569.25	0	7.82597e-05
	EAHDVEATSER	28	1	1	AT5G40450.1		1243.55	0	0.00127158
	KGNEEINETER	16	1	1	AT5G40450.1		1318.62	0	1.22638e-05
	ASLDHEEEMDKITKDTEEQEHVLVR	4	1	1	AT5G40450.1		2981.41	0	2.82085e-05
	ISLQVEHLKDFETSKK	20	1	1	AT5G40450.1		1902.03	0	3.07979e-05
	QSLDTPSEEETSKTIDEK	24	1	1	AT5G40450.1		2036.95	0	0.000415549
	VGETKPKESQAEGAEK	20	1	1	AT5G40450.1		1687.84	0	4.11801e-05
	EEVPHNALENEEEMNEVVASEKQISDPVGVIKK	12	1	1	AT5G40450.1		3690.82	0	0.000169186
	SSEAEDDKPDEHVDSSTSPMLSEK	13	1	1	AT5G40450.1	M20(Oxidation)	2636.11	0	5.02758e-08
	SSAVQEEQFGEHTEPCSSEIKDESHGKEESVEVK	8	1	1	AT5G40450.1	C16(Carbamidomethyl)	3832.7	0	1.11981e-06
	REVEHVKAEMEDAIK	9	1	1	AT5G40450.1	M10(Oxidation)	1799.89	0	6.57452e-06
	KVEEIHEEEPK	16	1	1	AT5G40450.1		1366.68	0	0.00013085
	EIEQEEGKQTNIVK	24	1	1	AT5G40450.1		1644.84	0	1.35676e-07
	TDDEKVKDAEPIGDMR	8	1	1	AT5G40450.1		1818.85	0	8.03216e-07
	TEEIQERPSESKASLEPK	28	1	1	AT5G40450.1		2058.03	0	3.19881e-05
	TVALDHEEEFVNHEAPKLEETKDEK	24	1	1	AT5G40450.1		2937.41	0	3.316e-05
	EISEQEHKLNDLTDVQEDIGTYVK	20	1	1	AT5G40450.1		2803.36	0	0.000560042
	ESFIEAPVSMLASGEDEPVTPQEGDYAANTQEERHVSAETEEK	4	1	1	AT5G40450.1		4707.12	0	0.000488361
	ASEAEHEDPVDDIKSNDDRDFPTEQAPK	28	1	1	AT5G40450.1		3155.4	0	7.64958e-05
	EAIGEELKVPSSKVLDDIQENSNTEAVTNFADR	52	1	1	AT5G40450.1		3618.79	0	0.000138296
	IILSDVTLENKK	20	1	1	AT5G40450.1		1372.8	0	0.000165791
	THKKSHGILSGVGSK	36	1	1	AT5G40450.1		1535.86	0	3.14717e-06
	SEKSPSDLVLNVDK	24	1	1	AT5G40450.1		1530.8	0	4.12897e-06
	SNDDRDFPTEQAPKDQSDEVSADETVPK	20	1	1	AT5G40450.1		3120.39	0	4.62998e-05
	NLPVETSDADNTLSSQLVSETKEEHKLQAGEILPTEIIPR	32	1	1	AT5G40450.1		4402.26	0	4.46682e-05
	GDGHDSVAAQKEETSSIEEKR	12	1	1	AT5G40450.1		2273.06	0	8.76431e-07
	EEDTTGKPEEVSVEKPVIEEDQTEAK	16	1	1	AT5G40450.1		2916.38	0	2.25023e-07
	SHGILSGVGSKVK	16	1	1	AT5G40450.1		1268.73	0	0.000462773
	AEMEDAIKHEVSVEEK	8	1	1	AT5G40450.1		1843.87	0	0.00024803
	NNTSENIDHEAAKEIEQEEGKQTNIVK	16	1	1	AT5G40450.1		3068.47	0	2.82709e-05
	VQVPDDEIKGDGHDSVAAQKEETSSIEEK	24	1	1	AT5G40450.1		3140.48	0	4.33882e-05
	EDVDEIHIPSVALPLDEQEK	12	1	1	AT5G40450.1		2276.13	0	0.000344771
	VQVPDDEIKGDGHDSVAAQK	20	1	1	AT5G40450.1		2108.03	0	4.71943e-05
	EEVTLHQEGREEGSYGLDTKDEAVSVLESR	16	1	1	AT5G40450.1		3362.6	0	4.91397e-05
	DFVSDILEAKRLHGDK	16	1	1	AT5G40450.1		1842.97	0	0.000138226
	SISVETEESVGETKPK	16	1	1	AT5G40450.1		1719.86	0	0.000293147
	ATETTIDQTLPIGTSQADQTPSLVSDKDDQTPKQVEEILEEETK	12	1	1	AT5G40450.1		4829.35	0	3.7051e-06
	DVNMLDVQSGESEKYQENEPDISLVSK	4	1	1	AT5G40450.1	Q16(Deamidated)	3054.41	0	2.68452e-06
	EAIGEELKVPSSKVLDDIQENSNTEAVTNFADR	8	1	1	AT5G40450.1	Q19(Deamidated)	3619.78	0	2.39505e-06
	NGDNTVNETVSEDQTATDGEPLHDVETIKR	12	1	1	AT5G40450.1	Q14(Deamidated)	3285.51	0	1.77088e-07
	EEILISSSPLSAEEQEHVISDEKQEER	2	1	1	AT5G40450.1	Q24(Deamidated)	3112.48	0	0.000193732
	EEDTTGKPEEVSVEKPVIEEDQTEAK	2	1	1	AT5G40450.1	Q22(Deamidated)	2917.38	0	8.71384e-06
	EEVPHNALENEEEMNEVVASEKQISDPVGVIKK	4	1	1	AT5G40450.1	Q23(Deamidated)	3691.8	0	0.000306552
	SSAVQEEQFGEHTEPCSSEIKDESHGKEESVEVK	2	1	1	AT5G40450.1	Q8(Deamidated); C16(Carbamidomethyl)	3833.7	0	4.20998e-06
	GLDIAETTHLSLPSVDQKEDVDEIHIPSVALPLDEQEK	10	1	1	AT5G40450.1	Q17(Deamidated)	4182.11	0	1.43929e-06
	DIESLSSVSKTQDKPEPEYEVPNQQKR	23	1	1	AT5G40450.1	N23(Deamidated)	3132.54	0	0.000113667
	ILKEDNHQEEYAESVEATKNSDAAEQSSR	4	1	1	AT5G40450.1	N6(Deamidated)	3279.5	0	5.98406e-05
	NLPVETSDADNTLSSQLVSETKEEHKLQAGEILPTEIIPR	5	1	1	AT5G40450.1	Q16(Deamidated)	4403.25	0	0.000300647
	ATETTIDQTLPIGTSQADQTPSLVSDKDDQTPKQVEEILEEETK	6	1	1	AT5G40450.1	Q30(Deamidated)	4830.34	0	0.000634155
	DAHVETPTAPIILEENDSETLIAEAKKGNEEINETER	8	1	1	AT5G40450.1		4106.02	0	9.34252e-07
	NSDGTEQISR	4	1	1	AT5G40450.1		1106.5	0	0.000142335
	DFPTEQAPKDQSDEVSADETVPK	20	1	1	AT5G40450.1		2533.16	0	1.66269e-06
	TVETSVNGTEAEHNATVSVEEISR	16	1	1	AT5G40450.1		2559.21	0	7.3339e-07
	ILKEDNHQEEYAESVEATK	12	1	1	AT5G40450.1		2233.06	0	3.27274e-08
	GLDIAETTHLSLPSVDQKEDVDEIHIPSVALPLDEQEKVTSTEK	8	1	1	AT5G40450.1		4826.48	0	0.000364815
	DETHETVKEEDQIVDIK	16	1	1	AT5G40450.1		2027.97	0	7.43644e-06
	EDDKVALQEDNCADDVR	4	1	1	AT5G40450.1	C12(Carbamidomethyl)	1991.86	0	2.41683e-06
	DETHETVKEEDQIVDIKDK	16	1	1	AT5G40450.1		2271.1	0	0.00124682
	EEVPHNALENEEEMNEVVASEKQISDPVGVIKK	9	1	1	AT5G40450.1	M14(Oxidation)	3706.81	0	1.76849e-08
	EDDKVALQEDNCADDVRETNDIQEER	4	1	1	AT5G40450.1	C12(Carbamidomethyl)	3106.35	0	7.10727e-05
	TEEDENDDEDHEHKDDKTSPDSIVMVEAK	4	1	1	AT5G40450.1		3357.42	0	5.27194e-06
	VTSTEKGETKSSEAEDDKPDEHVDSSTSPMLSEK	4	1	1	AT5G40450.1		3680.65	0	1.34968e-05
	EVEHVKAEMEDAIKHEVSVEEK	7	1	1	AT5G40450.1	M9(Oxidation)	2581.24	0	1.91721e-06
	ESFIEAPVSMLASGEDEPVTPQEGDYAANTQEERHVSAETEEK	3	1	1	AT5G40450.1	Q22(Deamidated)	4708.12	0	9.51592e-07
	SSEAEDDKPDEHVDSSTSPMLSEKNDNETQTSK	3	1	1	AT5G40450.1	N25(Deamidated)	3638.55	0	1.07736e-09
	VPSTESEKYQGNEPETVLVSNTGSYEK	3	1	1	AT5G40450.1	N12(Deamidated)	2973.4	0	1.05275e-07
	ESFIEAPVSMLASGEDEPVTPQEGDYAANTQEERHVSAETEEK	3	1	1	AT5G40450.1	Q22(Deamidated); Q31(Deamidated)	4709.11	0	8.04511e-05
	HSLEQEEDIGNISKVCEEIPIKTDEVR	4	1	1	AT5G40450.1	N11(Deamidated); C16(Carbamidomethyl)	3168.55	0	5.38843e-05
	ATETTIDQTLPIGTSQADQTPSLVSDKDDQTPKQVEEILEEETK	10	1	1	AT5G40450.1	Q8(Deamidated); Q34(Deamidated)	4831.35	0	2.43635e-05
	DAHVETPTAPIILEENDSETLIAEAKKGNEEINETER	13	1	1	AT5G40450.1	N33(Deamidated)	4107	0	1.35765e-07
	IEEKPEEEVTLYQEGQVDGSYGLETK	16	1	1	AT5G40450.1		2970.4	0	1.40447e-07
	DVNMLDVQSGESEKYQENEPDISLVSK	3	1	1	AT5G40450.1	M4(Oxidation)	3069.41	0	2.17506e-06
	EDVDEIHIPSVALPLDEQEKVTSTEKGETK	16	1	1	AT5G40450.1		3336.67	0	0.000328997
	ASLDHEEEMDKITK	5	1	1	AT5G40450.1	M9(Oxidation)	1661.76	0	1.20838e-05
	EITNEVPSLENSK	16	1	1	AT5G40450.1		1459.73	0	0.000135182
	EEVPHNALENEEEMNEVVASEK	6	1	1	AT5G40450.1	M14(Oxidation)	2542.12	0	7.60736e-07
	EEHKLQAGEILPTEIIPR	8	1	1	AT5G40450.1		2073.13	0	0.000984938
	ESFIEAPVSMLASGEDEPVTPQEGDYAANTQEERHVSAETEEK	4	1	1	AT5G40450.1	M10(Oxidation)	4723.12	0	3.40999e-05
	GDGHDSVAAQKEETSSIEEK	12	1	1	AT5G40450.1		2116.95	0	0.000272644
	SLSDHIQKEPK	8	1	1	AT5G40450.1		1281.68	0	0.000360799
	ISLQVEHLKDFETSK	16	1	1	AT5G40450.1		1773.94	0	1.30641e-05
	ERGLDIAETTHLSLPSVDQK	12	1	1	AT5G40450.1		2209.15	0	0.000183775
	TEEDENDDEDHEHKDDKTSPDSIVMVEAK	5	1	1	AT5G40450.1	M25(Oxidation)	3373.41	0	1.92556e-05
	VTSTEKGETKSSEAEDDKPDEHVDSSTSPMLSEK	6	1	1	AT5G40450.1	M30(Oxidation)	3696.67	0	3.44685e-05
	TVALDHEEEFVNHEAPKLEETK	4	1	1	AT5G40450.1		2565.24	0	0.00140052
	TAETFSVQEAEILKTNINESEAHSAIGGEEDGQETK	8	1	1	AT5G40450.1		3862.79	0	0.000386823
	ASEAEHEDPVDDIKSNDDRDFPTEQAPK	2	1	1	AT5G40450.1	N16(Deamidated)	3156.4	0	1.02012e-05
	TAETFSVQEAEILKTNINESEAHSAIGGEEDGQETK	2	1	1	AT5G40450.1	Q8(Deamidated)	3863.8	0	0.000627826
	DDEEQEIVSSEVK	4	1	1	AT5G40450.1		1506.68	0	0.00211496
	EAIGEELKVPSSK	12	1	1	AT5G40450.1		1386.75	0	1.63583e-05
	EETVDALITNVQVQDQPKEDFEAAAIEK	4	1	1	AT5G40450.1		3130.54	0	0.000640492
	ETHKVQAEDIFSTETVPK	4	1	1	AT5G40450.1		2059.03	0	0.000734619
	GLDIAETTHLSLPSVDQKEDVDEIHIPSVALPLDEQEKVTSTEK	2	1	1	AT5G40450.1	Q17(Deamidated)	4827.45	0	0.000206454
	SQETVQDENTEDKHDVLKVPSTESEK	6	1	1	AT5G40450.1	N9(Deamidated)	2973.39	0	2.16891e-05
	EDVDEIHIPSVALPLDEQEKVTSTEKGETK	1	1	1	AT5G40450.1	Q18(Deamidated)	3337.66	0	0.000793744
	DVNMLDVQSGESEK	2	1	1	AT5G40450.1	M4(Oxidation)	1566.69	0	5.15931e-05
	ASLDHEEEMDKITKDTEEQEHVLVR	7	1	1	AT5G40450.1	M9(Oxidation)	2997.4	0	3.6468e-07
	EAIGEELKVPSSKVLDDIQENSNTEAVTNFADR	6	1	1	AT5G40450.1	Q19(Deamidated); N21(Deamidated)	3620.75	0	0.00147166
	LDAIEKEELETVKTVVQDAK	4	1	1	AT5G40450.1		2258.22	0	0.00655837
	SVEQMQKPKLESPSEVSEETSKTVDEK	2	1	1	AT5G40450.1	M5(Oxidation)	3065.48	0	1.40641e-05
	DIGPSLTEICSINQNQPEEQVK	10	1	1	AT5G40450.1	C10(Carbamidomethyl); N13(Deamidated)	2500.2	0	1.66287e-05
	VLDDIQENSNTEAVTNFADR	4	1	1	AT5G40450.1	N16(Deamidated)	2252.05	0	4.35336e-05
	HSLEQEEDIGNISKVCEEIPIKTDEVR	1	1	1	AT5G40450.1	Q5(Deamidated); N11(Deamidated); C16(Carbamidomethyl)	3169.54	0	2.08626e-05
	EPQQDFNGSTSEK	24	1	1	AT5G40450.1		1466.63	8.7e-05	0.00446045
	EAHDVEATSERNLPVETSDADNTLSSQLVSETK	28	1	1	AT5G40450.1		3572.68	8.7e-05	0.000192361
	LQEEQVDKHEPTK	20	1	1	AT5G40450.1		1580.79	8.7e-05	0.000368592
	ERGLDIAETTHLSLPSVDQKEDVDEIHIPSVALPLDEQEK	4	1	1	AT5G40450.1		4466.25	8.7e-05	0.000231841
	TDDEKVKDAEPIGDMR	6	1	1	AT5G40450.1	M15(Oxidation)	1834.85	9.9e-05	0.000172037
	DIESLSSVSKTQDKPEPEYEVPNQQKR	3	1	1	AT5G40450.1	Q12(Deamidated); Q24(Deamidated)	3133.53	0.0001	0.000406075
	TEEDENDDEDHEHKDDKTSPDSIVMVEAK	16	1	1	AT5G40450.1	S19(Phospho)	3437.39	0.00013	0.000361432	12.1658	0.126863	T(1): 61.9; T(18): 12.7; S(19): 12.7; S(22): 12.7
	EDFEAAAIEK	20	1	1	AT5G40450.1		1122.53	0.000146	0.00224184
	VPSSKVLDDIQENSNTEAVTNFADR	4	1	1	AT5G40450.1		2749.32	0.000146	0.000847262
	EVEHVKAEMEDAIK	4	1	1	AT5G40450.1	M9(Oxidation)	1643.79	0.000146	0.000890949
	AEMEDAIKHEVSVEEK	2	1	1	AT5G40450.1	M3(Oxidation)	1859.86	0.000146	0.000659014
	KKDDEEQEIVSSEVK	4	1	1	AT5G40450.1		1762.87	0.000146	0.000764985
	NNTSENIDHEAAKEIEQEEGK	4	1	1	AT5G40450.1		2385.08	0.000149	0.000293638
	DTVSIVKTHKK	28	1	1	AT5G40450.1		1255.73	0.000153	0.000504186
	ETDDAIDKTQPEIR	12	1	1	AT5G40450.1		1630.79	0.000186	0.000237797
	ETKLEKHEPTNEEVK	8	1	1	AT5G40450.1		1810.91	0.000192	0.00108389
	LEKHEPTNEEVK	8	1	1	AT5G40450.1		1452.73	0.000192	0.00199855
	ELEVGNDFVSR	16	1	1	AT5G40450.1		1264.61	0.000194	0.00852302
	NAEPVEATQNLDDAEQISREVTVDTER	4	1	1	AT5G40450.1		3029.42	0.000194	0.00341708
	EEVDQSSKDTEEHEHVLER	1	1	1	AT5G40450.1	Q5(Deamidated)	2297.03	0.000194	0.00318632
	EETVSVPESIELEEQPQEER	2	1	1	AT5G40450.1	Q15(Deamidated)	2358.1	0.000196	0.00682279
	DAHVETPTAPIILEENDSETLIAEAK	1	1	1	AT5G40450.1	N16(Deamidated)	2807.39	0.000239	0.0031563
	EIAQVLPREEILISSSPLSAEEQEHVISDEKQEER	3	1	1	AT5G40450.1	Q4(Deamidated); Q32(Deamidated)	4020.02	0.000239	0.0104882
	ETNDIQEER	20	1	1	AT5G40450.1		1133.5	0.000274	0.00562935
	EVTVDRAKEEDIAPK	24	1	1	AT5G40450.1		1699.88	0.000274	0.0077716
	DQSDEVSADETVPKEAIGEELKVPSSK	4	1	1	AT5G40450.1		2887.4	0.000313	0.00528254
	ITKDTEEQEHVLVR	4	1	1	AT5G40450.1		1696.88	0.000313	0.0120196
	EEEKEINQESFNNVK	4	1	1	AT5G40450.1		1836.86	0.000313	0.0102668
	VPSSKVLDDIQENSNTEAVTNFADR	8	1	1	AT5G40450.1	Q11(Deamidated)	2750.32	0.000355	0.0128187
	SLETVQTVESPSSLLFSSEEQDHVTVAEEIVDEK	1	1	1	AT5G40450.1	Q6(Deamidated); Q21(Deamidated)	3763.79	0.000355	0.0206162
	KVLTGKSSHTTKPSSPT	12	1	1	AT5G40450.1		1755.95	0.000356	0.00510417
	EDFEAAAIEKEISEQEHKLNDLTDVQEDIGTYVK	2	1	1	AT5G40450.1	Q15(Deamidated)	3907.87	0.000362	0.0142885
	DIGPSLTEICSINQNQPEEQVKEACSKEEQEK	6	1	1	AT5G40450.1	C10(Carbamidomethyl); Q16(Deamidated); C25(Carbamidomethyl)	3718.71	0.000413	0.00357882
	KEEEEAEMKTDAEPR	3	1	1	AT5G40450.1	M8(Oxidation)	1807.8	0.000467	0.00294535
	NLPVETSDADNTLSSQLVSETKEEHKLQAGEILPTEIIPR	2	1	1	AT5G40450.1	N11(Deamidated); Q28(Deamidated)	4404.25	0.000481	0.00236662
	VKDAEPIGDMRER	1	1	1	AT5G40450.1	M10(Oxidation)	1531.75	0.000507	0.00545477
	EEILISSSPLSAEEQEHVISDEKQEEREPQQDFNGSTSEK	3	1	1	AT5G40450.1	Q24(Deamidated)	4560.12	0.000551	0.00403631
	LESPSEVSEETSKTVDEK	12	1	1	AT5G40450.1		1993.94	0.000564	0.0424022
	EAIGEELKVPSSKVLDDIQENSNTEAVTNFADR	4	1	1	AT5G40450.1	Q19(Deamidated); N21(Deamidated); N23(Deamidated)	3621.75	0.000564	0.0298125
	EETDSRTVETSVNGTEAEHNATVSVEEISR	2	1	1	AT5G40450.1	N20(Deamidated)	3277.51	0.000564	0.0316748
	EAEPFYKTVVEDAKIVNTEETTAHESK	1	1	1	AT5G40450.1	N17(Deamidated)	3066.5	0.000564	0.0274702
	TENGDKFEEIPSVVEGAGLDETTHNQTLLDVESVVK	4	1	1	AT5G40450.1		3899.91	0.000628	0.0140026
	DLFSVVK	12	1	1	AT5G40450.1		807.461	0.000671	0.00764518
	VKDAEPIGDMR	3	1	1	AT5G40450.1	M10(Oxidation)	1246.61	0.000846	0.0124826
	EIAQVLPR	24	1	1	AT5G40450.1		925.546	0.000859	0.0133634
	EITNEVPSLENSKIEEELQK	4	1	1	AT5G40450.1		2329.17	0.000859	0.0148368
	SNDDRDFPTEQAPKDQSDEVSADETVPK	3	1	1	AT5G40450.1	Q11(Deamidated)	3121.39	0.000887	0.0185909
	DLPVQNLSELIQSHQSPNQVEETSFEFNKAQEDKK	2	1	1	AT5G40450.1	Q31(Deamidated)	4057.97	0.001085	0.0538599
	SQETVQDENTEDKHDVLK	3	1	1	AT5G40450.1	N9(Deamidated)	2115.98	0.001744	0.040515
	KSLSDHIQKEPK	4	1	1	AT5G40450.1		1409.77	0.001791	0.0585862
	EITNEVPSLENSKIEEELQKK	4	1	1	AT5G40450.1		2457.27	0.001791	0.0565154
	EEVPMLQIKNEDDATKIHETR	4	1	1	AT5G40450.1		2496.24	0.001954	0.0513791
	EAHDVEATSERNLPVETSDADNTLSSQLVSETK	1	1	1	AT5G40450.1	N12(Deamidated)	3573.69	0.002675	0.0935994
	DESHGKEESVEVK	4	1	1	AT5G40450.1		1472.68	0.004899	0.123194
	DDEEQEIVSSEVKKDNK	4	1	1	AT5G40450.1		1991.94	0.007707	0.16322
	EELETVKTVVQDAK	4	1	1	AT5G40450.1		1588.84	0.008072	0.158653
	LQAGEILPTEIIPR	4	1	1	AT5G40450.1		1549.89	0.01945	0.33705
	SNDDRDFPTEQAPK	4	1	1	AT5G40450.1		1619.73	0.020914	0.389246
	EAEPFYKTVVEDAK	4	1	1	AT5G40450.1		1625.8	0.029117	0.517422
	DAEPIGDMRER	2	1	1	AT5G40450.1	M8(Oxidation)	1304.59	0.237503	1
	ELEVGNDFVSRDGEK	1	1	1	AT5G40450.1	N6(Deamidated)	1694.79	0.338844	1
	TVVEDAKIVNTEETTAHESKILK	1	1	1	AT5G40450.1	T11(Phospho); T14(Phospho)	2715.3	0.480301	0.974716	8.05899	0.199909	T(1): 21.6; T(11): 52.3; T(14): 52.3; T(15): 52.3; S(19): 21.6
	VQVPDDEIKGDGHDSVAAQKEETSSIEEK	1	1	1	AT5G40450.1	Q19(Deamidated)	3141.45	0.576598	1
	YQENEPDISLVSKTENGDK	1	1	1	AT5G40450.1	Y1(Phospho); S12(Phospho); T14(Phospho)	2405.92	0.651266	1	42.589	0.993139	Y(1): 99.9; S(9): 0.7; S(12): 99.7; T(14): 99.7
	EEDQIVDIKDKK	4	1	1	AT5G40450.1		1459.77
AT4G17720.1	RNA-binding (RRM/RBD/RNP motifs) family protein	18.53	1	2	3	19
	Sequence	# PSMs	# Proteins	# Protein Groups	Protein Group Accessions	Modifications	MH+ [Da]	q-Value	PEP	pRS Score	pRS Probability	pRS Site Probabilities
	AGDSVLRKAEDVVSSMLAK	4	1	1	AT4G17720.1		1976.04	0	5.25554e-05
	VHLSESPKAASSTQEAER	13	1	1	AT4G17720.1	S6(Phospho)	2006.91	0.000141	0.00173386	60.5547	0.86214	S(4): 13.8; S(6): 86.2; S(11): 0.0; S(12): 0.0; T(13): 0.0
	SVDEKHQLTSTASAKVASFDK	2	1	1	AT4G17720.1	S18(Phospho)	2329.11	0.422044	0.956217	9.04658	0.127577	S(1): 2.2; T(9): 12.8; S(10): 12.8; T(11): 12.8; S(13): 46.7; S(18): 12.8
AT1G01320.2	Tetratricopeptide repeat (TPR)-like superfamily protein	16.79	2	26	28	644
	Sequence	# PSMs	# Proteins	# Protein Groups	Protein Group Accessions	Modifications	MH+ [Da]	q-Value	PEP	pRS Score	pRS Probability	pRS Site Probabilities
	LVADFGSLELSPVDGR	16	4	3	AT1G01320.2;AT1G15290.1;AT4G28080.1		1674.86	0	2.69231e-08
	NVEADIDNPLFQNATQQNDKYYILK	24	2	1	AT1G01320.2		2954.45	0	3.49474e-07
	NSVVSLGKSPSYK	24	2	1	AT1G01320.2		1365.73	0	7.51668e-06
	NGTPKPDASIASKGHLSVSDLLDYINPSHNAK	72	2	1	AT1G01320.2		3346.7	0	2.17163e-07
	RTASYSSYADHHSPGLTTQGTK	16	2	1	AT1G01320.2		2365.11	0	1.28957e-05
	SKQSNVSEHLVEIPR	48	2	1	AT1G01320.2		1722.91	0	5.90079e-05
	TASYSSYADHHSPGLTTQGTK	48	2	1	AT1G01320.2		2209.01	0	6.37386e-06
	GHLSVSDLLDYINPSHNAK	28	2	1	AT1G01320.2		2080.05	0	3.98447e-07
	NSVVSLGKSPSYKEVALAPPGSIAK	52	2	1	AT1G01320.2		2499.38	0	6.18897e-07
	ASIGKVYTYQKK	24	2	1	AT1G01320.2		1385.78	0	1.37457e-05
	RASIGKVYTYQK	24	2	1	AT1G01320.2		1413.79	0	0.000268598
	ASIGKVYTYQK	28	2	1	AT1G01320.2		1257.68	0	5.427e-05
	EGTQDVAVADEVMDSVNHVNNAVAR	8	2	1	AT1G01320.2		2640.23	0	3.0562e-06
	KRTASYSSYADHHSPGLTTQGTK	24	2	1	AT1G01320.2		2493.21	0	0.000101504
	QSNVSEHLVEIPR	24	2	1	AT1G01320.2		1507.79	0	9.22695e-05
	EKSKQSNVSEHLVEIPR	24	2	1	AT1G01320.2		1980.05	0	0.00034984
	NGTPKPDASIASKGHLSVSDLLDYINPSHNAK	9	2	1	AT1G01320.2	N1(Deamidated)	3347.69	0	2.08265e-06
	YQVWVPQAEVSDKQEDDEMEKK	3	2	1	AT1G01320.2	Q14(Deamidated)	2682.22	0	0.000646536
	YQVWVPQAEVSDKQEDDEMEKK	4	2	1	AT1G01320.2		2681.24	0	1.55249e-07
	TAGETSEEDGLKTDASSVEPPTLSSTVQSEAYHTK	5	2	1	AT1G01320.2	Q28(Deamidated)	3653.7	0	8.90551e-06
	TAGETSEEDGLKTDASSVEPPTLSSTVQSEAYHTK	12	2	1	AT1G01320.2		3652.69	0	5.46254e-05
	EGTQDVAVADEVMDSVNHVNNAVAR	7	2	1	AT1G01320.2	M13(Oxidation)	2656.22	0	2.32673e-05
	KRTASYSSYADHHSPGLTTQGTK	1	2	1	AT1G01320.2	Q20(Deamidated)	2494.2	0	0.000524972
	NSVVSLGKSPSYKEVALAPPGSIAK	1	2	1	AT1G01320.2	N1(Deamidated)	2500.38	0	0.00080073
	KNVEADIDNPLFQNATQQNDKYYILK	4	2	1	AT1G01320.2		3082.56	0	0.000507671
	NGTPKPDASIASKGHLSVSDLLDYINPSHNAK	3	2	1	AT1G01320.2	N1(Deamidated); N26(Deamidated)	3348.69	0	0.00193859
	TFSILLR	20	2	1	AT1G01320.2		849.519	8.7e-05	0.000634866
	NVEADIDNPLFQNATQQNDKYYILKK	12	2	1	AT1G01320.2		3082.55	8.7e-05	0.000891537
	AFEQQEAAR	8	2	1	AT1G01320.2		1049.5	0.000141	0.00185747
	DEQMITGLEEEVKK	1	2	1	AT1G01320.2	M4(Oxidation)	1664.8	0.000254	0.0015714
	TASYSSYADHHSPGLTTQGTK	2	2	1	AT1G01320.2	Q18(Deamidated)	2210	0.000285	0.000741415
	EGTQDVAVADEVMDSVNHVNNAVAR	12	2	1	AT1G01320.2	N21(Deamidated)	2641.22	0.000355	0.00832677
	NSVVSLGKSPSYKEVALAPPGSIAK	5	2	1	AT1G01320.2	S11(Phospho)	2579.35	0.000356	0.00370611	29.9437	0.433243	S(2): 0.2; S(5): 6.0; S(9): 6.0; S(11): 43.3; Y(12): 43.3; S(22): 1.1
	EVALAPPGSIAK	28	2	1	AT1G01320.2		1152.66	0.00067	0.00834815
	MPISLLNRPYDSQPFK	1	2	1	AT1G01320.2	M1(Oxidation)	1921.99	0.000744	0.00498119
	STQPSSGNAKTAGETSEEDGLKTDASSVEPPTLSSTVQSEAYHTK	10	2	1	AT1G01320.2	S26(Phospho)	4690.11	0.000811	0.0450468	40.5287	0.170797	S(1): 2.7; T(2): 2.7; S(5): 2.7; S(6): 2.7; T(11): 2.7; T(15): 17.1; S(16): 17.1; T(23): 17.1; S(26): 17.1; S(27): 17.1; T(32): 0.5; S(34): 0.1; S(35): 0.1; T(36): 0.1; S(39): 0.0; Y(42): 0.0; T(44): 0.0
	STQPSSGNAKTAGETSEEDGLKTDASSVEPPTLSSTVQSEAYHTK	3	2	1	AT1G01320.2	N8(Deamidated); Q38(Deamidated)	4612.15	0.002614	0.0873301
	QEDDEMEKKTEQGTSMELTR	4	2	1	AT1G01320.2	Q1(Deamidated); Q12(Deamidated)	2387.03	0.0048	0.149781
	SPSYKEVALAPPGSIAK	4	2	1	AT1G01320.2		1714.94	0.017568	0.357175
	QEDDEMEKKTEQGTSMELTR	1	2	1	AT1G01320.2	M16(Oxidation)	2401.04	0.10843	0.988511
AT4G11740.1	Ubiquitin-like superfamily protein	61.17	1	30	30	801
	Sequence	# PSMs	# Proteins	# Protein Groups	Protein Group Accessions	Modifications	MH+ [Da]	q-Value	PEP	pRS Score	pRS Probability	pRS Site Probabilities
	SRQDRPAGSVANNNNQDYNDIEEEMIR	14	1	1	AT4G11740.1	M25(Oxidation)	3151.41	0	3.23252e-09
	LAAPSSPFDDDSDDVDEQPLVR	36	1	1	AT4G11740.1		2388.07	0	6.67567e-07
	SQGYKASTSEIGASAVTAAQGPQDTQALNGR	36	1	1	AT4G11740.1		3064.49	0	2.98506e-10
	LQTLFNFIDIAR	24	1	1	AT4G11740.1		1450.8	0	2.50159e-05
	SRQDRPAGSVANNNNQDYNDIEEEMIR	16	1	1	AT4G11740.1		3135.41	0	1.38606e-08
	SAEEEVLRSQGYKASTSEIGASAVTAAQGPQDTQALNGR	28	1	1	AT4G11740.1		3977.93	0	4.65897e-05
	SDKLQTLFNFIDIAR	16	1	1	AT4G11740.1		1780.96	0	1.25178e-07
	EASLPKEPQADEENAITLLIR	48	1	1	AT4G11740.1		2337.23	0	1.68232e-07
	TIGRPPFSLLDSDFAR	120	1	1	AT4G11740.1		1791.94	0	1.14388e-06
	EEEAQRKLEEEQELER	24	1	1	AT4G11740.1		2044.98	0	0.000250452
	EVRQIPIEVKDSSGPSGR	44	1	1	AT4G11740.1		1954.03	0	2.5155e-05
	ASTSEIGASAVTAAQGPQDTQALNGR	12	1	1	AT4G11740.1		2501.22	0	7.79168e-05
	HAFGDGESESTLNDLGLTSKQEALFLELI	28	1	1	AT4G11740.1		3134.56	0	0.00041204
	RVFDSDPLMPRPPFVSHPR	20	1	1	AT4G11740.1		2250.16	0	1.39449e-05
	QIPIEVKDSSGPSGR	28	1	1	AT4G11740.1		1569.82	0	1.64452e-05
	RVFDSDPLMPRPPFVSHPR	16	1	1	AT4G11740.1	M9(Oxidation)	2266.15	0	4.30203e-07
	VFDSDPLMPRPPFVSHPR	8	1	1	AT4G11740.1		2094.06	0	0.000548477
	SGSPEEEHASINPAER	36	1	1	AT4G11740.1		1709.77	0	1.53228e-05
	EQQDDEYVASLQADRDK	24	1	1	AT4G11740.1		2009.9	0	0.000354706
	HAFGDGESESTLNDLGLTSK	20	1	1	AT4G11740.1		2077.97	0	6.56177e-05
	FLKSDKLQTLFNFIDIAR	36	1	1	AT4G11740.1		2169.2	0	6.02838e-07
	EQQDDEYVASLQADR	12	1	1	AT4G11740.1		1766.78	0	2.7527e-10
	EPQADEENAITLLIR	12	1	1	AT4G11740.1		1711.89	0	0.000572732
	EQQDDEYVASLQADRDKEMK	4	1	1	AT4G11740.1	M19(Oxidation)	2414.07	0	0.000150876
	VFDSDPLMPRPPFVSHPR	4	1	1	AT4G11740.1	M8(Oxidation)	2110.05	0	7.00591e-05
	ATPNQEAIDTFISITGASDAVALQK	1	1	1	AT4G11740.1	N-Term(Acetyl)	2603.32	0	8.33236e-06
	EQQDDEYVASLQADRDKEMK	8	1	1	AT4G11740.1		2398.08	8.7e-05	0.00121851
	KLEEEQELER	28	1	1	AT4G11740.1		1302.65	8.7e-05	0.00208983
	ASTSEIGASAVTAAQGPQDTQALNGR	4	1	1	AT4G11740.1	Q15(Deamidated)	2502.22	0.0001	0.00341115
	SRSGSPEEEHASINPAER	8	1	1	AT4G11740.1		1952.9	0.000186	0.00178685
	SAEEEVLRSQGYKASTSEIGASAVTAAQGPQDTQALNGR	5	1	1	AT4G11740.1	Q10(Deamidated)	3978.93	0.000239	0.0108028
	AQPRPPSPSLTAQR	21	1	1	AT4G11740.1	S9(Phospho)	1585.78	0.000425	0.0132163	88.478	0.987851	S(7): 0.6; S(9): 98.8; T(11): 0.6
	LEEHRGDLNQAVNAYFSEGDRNVVR	4	1	1	AT4G11740.1		2888.41	0.00059	0.00441287
	HRPRRAASGSLAPPNADR	28	1	1	AT4G11740.1		1929.02	0.000594	0.0169316
	EVRQIPIEVK	12	1	1	AT4G11740.1		1210.72	0.000664	0.0628704
	LAAPSSPFDDDSDDVDEQPLVR	1	1	1	AT4G11740.1	Q18(Deamidated)	2389.07	0.000717	0.00941948
	EQQDDEYVASLQADRDKEMK	3	1	1	AT4G11740.1	Q12(Deamidated)	2399.08	0.002903	0.0479105
	QIPIEVK	12	1	1	AT4G11740.1		826.504	0.012267	0.238518
AT1G43690.1	ubiquitin interaction motif-containing protein	25.21	1	10	10	148
	Sequence	# PSMs	# Proteins	# Protein Groups	Protein Group Accessions	Modifications	MH+ [Da]	q-Value	PEP	pRS Score	pRS Probability	pRS Site Probabilities
	RSKPIEEEETGSGSQSGGESPEAK	48	1	1	AT1G43690.1		2476.13	0	5.17968e-07
	VLPISVVGGDKDEEVVGSCLGK	12	1	1	AT1G43690.1	C19(Carbamidomethyl)	2257.17	0	0.000196531
	MVLFPKSPSPVNK	8	1	1	AT1G43690.1		1443.8	0	0.000171973
	DSEVNQPKPVQHAPLVDCIR	40	1	1	AT1G43690.1	C18(Carbamidomethyl)	2302.16	0	1.50309e-05
	ADHQEDEDLKLALK	6	1	1	AT1G43690.1	N-Term(Acetyl)	1666.83	0	5.92577e-06
	MSMQYNPPEPK	4	1	1	AT1G43690.1	M1(Oxidation); M3(Oxidation)	1353.58	0	0.000254173
	ELMAAAAEKR	2	1	1	AT1G43690.1	M3(Oxidation)	1105.57	0	1.90324e-05
	SDINGGGQAMAVEGGMVPMQRPR	2	1	1	AT1G43690.1	M10(Oxidation); M16(Oxidation); M19(Oxidation)	2406.09	0	3.8378e-08
	VFDIYHFNGIAK	16	1	1	AT1G43690.1		1423.74	8.7e-05	0.00384
	DSEVNQPKPVQHAPLVDCIRTR	3	1	1	AT1G43690.1	Q6(Deamidated); C18(Carbamidomethyl)	2560.31	0.000194	0.00857364
	MVLFPKSPSPVNK	1	1	1	AT1G43690.1	M1(Oxidation)	1459.8	0.000274	0.00195183
	RSKPIEEEETGSGSQSGGESPEAK	6	1	1	AT1G43690.1	S20(Phospho)	2556.1	0.000425	0.00501974	59.0582	0.951064	S(2): 0.0; T(10): 0.0; S(12): 0.0; S(14): 0.3; S(16): 4.6; S(20): 95.1
AT1G07110.1	fructose-2,6-bisphosphatase	39.11	2	19	20	253
	Sequence	# PSMs	# Proteins	# Protein Groups	Protein Group Accessions	Modifications	MH+ [Da]	q-Value	PEP	pRS Score	pRS Probability	pRS Site Probabilities
	EMTIVVPDSSNIYSAFGEAESK	12	1	1	AT1G07110.1		2374.1	0	4.88343e-07
	NSEDSGVTVDGSPSAK	12	2	1	AT1G07110.1		1549.69	0	3.90374e-06
	ENLQPSTVRGIPDVSINPDPK	20	2	1	AT1G07110.1		2276.19	0	0.000148426
	SLSASGSFRNDSTPKAAQR	16	1	1	AT1G07110.1		1979.99	0	0.000138316
	HLAIVLVGLPAR	4	1	1	AT1G07110.1		1258.8	0	0.000387437
	IGGDSVISDSGKLYAK	24	1	1	AT1G07110.1		1609.84	0	8.90539e-05
	SAECPLESLELDLAHYEVPAPAPSANSYLVYAADNAENPR	18	1	1	AT1G07110.1	C4(Carbamidomethyl); N26(Deamidated)	4345.03	0	4.66781e-08
	TNLTASSIVGFPKVQWR	4	1	1	AT1G07110.1		1904.04	0	3.84197e-07
	SAECPLESLELDLAHYEVPAPAPSANSYLVYAADNAENPR	16	1	1	AT1G07110.1	C4(Carbamidomethyl)	4344.03	0	3.59802e-06
	EMTIVVPDSSNIYSAFGEAESKSVETLSPFQQK	5	1	1	AT1G07110.1	M2(Oxidation)	3634.73	0	2.45553e-05
	SAECPLESLELDLAHYEVPAPAPSANSYLVYAADNAENPR	1	1	1	AT1G07110.1	C4(Carbamidomethyl); N26(Deamidated); N35(Deamidated); N38(Deamidated)	4347.02	0	0.000706558
	SAECPLESLELDLAHYEVPAPAPSANSYLVYAADNAENPR	3	1	1	AT1G07110.1	C4(Carbamidomethyl); N26(Deamidated); N35(Deamidated)	4346.03	0	6.69301e-05
	AASIWTSTLQR	8	1	1	AT1G07110.1		1233.66	8.7e-05	0.00051109
	EMTIVVPDSSNIYSAFGEAESKSVETLSPFQQK	8	1	1	AT1G07110.1		3618.75	8.7e-05	0.000758609
	NRNTPCIVEEGENR	4	1	1	AT1G07110.1	C6(Carbamidomethyl)	1687.78	8.7e-05	0.000572138
	HLAIVLVGLPARGK	12	1	1	AT1G07110.1		1443.91	8.7e-05	0.00174779
	GLFVDRGVGSPR	24	1	1	AT1G07110.1		1259.69	0.000141	0.00250631
	EMTIVVPDSSNIYSAFGEAESK	2	1	1	AT1G07110.1	M2(Oxidation)	2390.1	0.000146	0.000375409
	SVETLSPFQQK	16	1	1	AT1G07110.1		1263.66	0.000192	0.00371854
	SLSASGSFRNDSTPK	16	1	1	AT1G07110.1		1553.75	0.000192	0.00424548
	SVETLSPFQQKDGQK	4	1	1	AT1G07110.1		1691.86	0.000546	0.0160516
	VEGELTPHVYGSLPLIGSWDPSKALPMQR	1	1	1	AT1G07110.1	Q28(Deamidated)	3178.64	0.000623	0.00863756
	LKHGVNMSADFFR	4	1	1	AT1G07110.1		1521.76	0.000694	0.0175082
	SLSASGSFRNDSTPKAAQR	10	1	1	AT1G07110.1	S7(Phospho)	2059.95	0.000701	0.0151588	30.1817	0.711194	S(1): 0.8; S(3): 5.9; S(5): 19.3; S(7): 71.1; S(12): 0.8; T(13): 2.1
	ALDEINAGVCDGMTYEEVKK	3	1	1	AT1G07110.1	C10(Carbamidomethyl); M13(Oxidation)	2258.03	0.000868	0.0151346
	EMTIVVPDSSNIYSAFGEAESKSVETLSPFQQK	3	1	1	AT1G07110.1	Q31(Deamidated)	3619.75	0.002047	0.0558434
	NRNTPCIVEEGENRLLTGGSLQGDAR	3	1	1	AT1G07110.1	N3(Deamidated); C6(Carbamidomethyl); N13(Deamidated)	2858.37	0.117433	0.851231
AT3G11130.1	Clathrin, heavy chain	38.77	1	8	59	1403
	Sequence	# PSMs	# Proteins	# Protein Groups	Protein Group Accessions	Modifications	MH+ [Da]	q-Value	PEP	pRS Score	pRS Probability	pRS Site Probabilities
	VNPGNAPLVVGQLLDDECPEDFIKGLILSVR	32	2	2	AT3G11130.1;AT3G08530.1	C18(Carbamidomethyl)	3377.78	0	1.46677e-09
	AQVPGTTQDHLQIFNIEAK	20	2	2	AT3G11130.1;AT3G08530.1		2110.08	0	5.41072e-06
	SQALEAHAASFAQFKVPGNENPSILISFASK	76	2	2	AT3G11130.1;AT3G08530.1		3259.67	0	2.90695e-09
	RGNLPGAENLVVQRFQELFAQTK	64	2	2	AT3G11130.1;AT3G08530.1		2615.4	0	2.79546e-08
	GKLNSYESLELSR	44	2	2	AT3G11130.1;AT3G08530.1		1495.77	0	3.53774e-05
	RGQCDEELINVTNKNSLFK	64	2	2	AT3G11130.1;AT3G08530.1	C4(Carbamidomethyl)	2265.12	0	2.05021e-07
	FQSVPVQAGQTPPLLQYFGTLLTR	76	2	2	AT3G11130.1;AT3G08530.1		2661.43	0	8.12614e-06
	QLIDQVVSTALPESK	16	2	2	AT3G11130.1;AT3G08530.1		1627.89	0	6.13866e-06
	DPTLAVVAYR	20	2	2	AT3G11130.1;AT3G08530.1		1104.6	0	1.28573e-05
	RGNLPGAENLVVQR	40	2	2	AT3G11130.1;AT3G08530.1		1522.84	0	1.69892e-05
	ILALKAQVPGTTQDHLQIFNIEAK	68	2	2	AT3G11130.1;AT3G08530.1		2648.48	0	6.72252e-09
	LIKPYMVAVQSNNVSAVNEALNEIYAEEEDYDRLR	8	1	1	AT3G11130.1		4056.01	0	1.6194e-05
	TANLANNQIINYK	24	2	2	AT3G11130.1;AT3G08530.1		1476.78	0	4.61816e-06
	TPDTVAKFQSVPVQAGQTPPLLQYFGTLLTR	28	2	2	AT3G11130.1;AT3G08530.1		3373.8	0	1.46766e-05
	ESIDLHDSFDQIGLAQKIEK	24	2	2	AT3G11130.1;AT3G08530.1		2286.16	0	3.78668e-06
	LHVIELGAQPGKPSFTKK	48	2	2	AT3G11130.1;AT3G08530.1		1950.12	0	1.10899e-05
	GNMQLFSVDQQR	6	2	2	AT3G11130.1;AT3G08530.1	M3(Oxidation)	1438.67	0	2.3433e-06
	EAAELAAESPQGILR	32	2	2	AT3G11130.1;AT3G08530.1		1554.81	0	0.000447666
	ESIDLHDSFDQIGLAQKIEKHELVEMR	8	2	2	AT3G11130.1;AT3G08530.1		3180.6	0	1.04421e-05
	MLGLVTQTSVYHWSIEGDSEPVKMFDR	8	1	1	AT3G11130.1		3125.51	0	5.83446e-06
	IIIDSNNNPEHFLTTNPYYDSK	20	2	2	AT3G11130.1;AT3G08530.1		2595.23	0	7.18033e-06
	EAAELAAESPQGILRTPDTVAK	36	2	2	AT3G11130.1;AT3G08530.1		2267.19	0	0.000712017
	ESNFYDAEKTKNFLMEAK	16	2	2	AT3G11130.1;AT3G08530.1		2165.01	0	6.9845e-06
	NRLRLLTQFLEHLVSEGSQDVHVHNALGK	8	2	2	AT3G11130.1;AT3G08530.1		3310.78	0	0.000210771
	LLTQFLEHLVSEGSQDVHVHNALGK	60	2	2	AT3G11130.1;AT3G08530.1		2771.44	0	0.00030277
	YKEAAELAAESPQGILRTPDTVAK	16	2	2	AT3G11130.1;AT3G08530.1		2558.36	0	7.26819e-05
	FGFVPDLTHYLYTNNMLR	12	1	1	AT3G11130.1		2201.08	0	4.98258e-05
	ATPKVVAAFAER	20	2	2	AT3G11130.1;AT3G08530.1		1259.71	0	5.22996e-05
	FQELFAQTKYK	24	2	2	AT3G11130.1;AT3G08530.1		1402.74	0	0.00020582
	WLVLIGIAPGSPERPQLVK	12	1	1	AT3G11130.1		2073.22	0	5.42871e-05
	LRLLTQFLEHLVSEGSQDVHVHNALGK	16	2	2	AT3G11130.1;AT3G08530.1		3040.63	0	7.7015e-06
	AGLYIQSLKHYSELPDIKR	12	2	2	AT3G11130.1;AT3G08530.1		2231.21	0	1.6219e-06
	GQCDEELINVTNKNSLFK	16	2	2	AT3G11130.1;AT3G08530.1	C3(Carbamidomethyl)	2109.02	0	0.000169158
	FGFVPDLTHYLYTNNMLR	7	1	1	AT3G11130.1	M16(Oxidation)	2217.08	0	9.38351e-07
	RDPTLAVVAYRR	16	2	2	AT3G11130.1;AT3G08530.1		1416.81	0	1.38326e-05
	YIEGYVQKVNPGNAPLVVGQLLDDECPEDFIKGLILSVR	8	2	2	AT3G11130.1;AT3G08530.1	Q20(Deamidated); C26(Carbamidomethyl)	4359.26	0	5.88774e-08
	VNPGNAPLVVGQLLDDECPEDFIKGLILSVR	3	2	2	AT3G11130.1;AT3G08530.1	N2(Deamidated); Q12(Deamidated); C18(Carbamidomethyl)	3379.77	0	0.000593237
	ESIDLHDSFDQIGLAQKIEKHELVEMR	2	2	2	AT3G11130.1;AT3G08530.1	Q16(Deamidated)	3181.59	0	3.55453e-05
	FQELFAQTKYKEAAELAAESPQGILR	36	2	2	AT3G11130.1;AT3G08530.1		2938.54	0	2.23161e-05
	GNMQLFSVDQQR	4	2	2	AT3G11130.1;AT3G08530.1		1422.68	0	8.43201e-06
	SHQMPEQVAFWKWITPK	4	1	1	AT3G11130.1		2113.07	0	7.36055e-07
	LHVIELGAQPGKPSFTK	16	2	2	AT3G11130.1;AT3G08530.1		1822.02	0	2.07982e-05
	GQCDEELINVTNKNSLFKLQAR	12	2	2	AT3G11130.1;AT3G08530.1	C3(Carbamidomethyl)	2577.31	0	0.00021675
	YIEGYVQKVNPGNAPLVVGQLLDDECPEDFIKGLILSVR	18	2	2	AT3G11130.1;AT3G08530.1	N13(Deamidated); Q20(Deamidated); C26(Carbamidomethyl)	4360.27	0	3.81702e-05
	VNPGNAPLVVGQLLDDECPEDFIKGLILSVR	6	2	2	AT3G11130.1;AT3G08530.1	Q12(Deamidated); C18(Carbamidomethyl)	3378.78	0	6.64913e-05
	TPDTVAKFQSVPVQAGQTPPLLQYFGTLLTR	24	2	2	AT3G11130.1;AT3G08530.1	Q14(Deamidated); Q17(Deamidated)	3375.79	0	0.000690166
	VPGNENPSILISFASK	16	2	2	AT3G11130.1;AT3G08530.1		1672.89	0	0.000175684
	ESIDLHDSFDQIGLAQKIEKHELVEMR	5	2	2	AT3G11130.1;AT3G08530.1	M26(Oxidation)	3196.6	0	7.10127e-06
	TPDTVAKFQSVPVQAGQTPPLLQYFGTLLTR	4	2	2	AT3G11130.1;AT3G08530.1	Q9(Deamidated)	3374.79	0	0.000340093
	EGLVSDAIESFIR	8	2	2	AT3G11130.1;AT3G08530.1		1435.74	0	3.26859e-08
	MLGLVTQTSVYHWSIEGDSEPVKMFDR	2	1	1	AT3G11130.1	M1(Oxidation); M24(Oxidation)	3157.49	0	2.46662e-05
	NRLRLLTQFLEHLVSEGSQDVHVHNALGK	8	2	2	AT3G11130.1;AT3G08530.1	Q19(Deamidated)	3311.78	0	0.000413924
	FQELFAQTK	24	2	2	AT3G11130.1;AT3G08530.1		1111.58	8.7e-05	0.00108307
	TGQIKEVERVTR	36	2	2	AT3G11130.1;AT3G08530.1		1415.79	8.7e-05	0.000166266
	VTRESNFYDAEKTK	12	2	2	AT3G11130.1;AT3G08530.1		1687.83	8.7e-05	0.000730849
	NLLENWLAEDKLECSEELGDLVK	4	2	2	AT3G11130.1;AT3G08530.1	C14(Carbamidomethyl)	2717.34	8.7e-05	0.00374949
	EVLTLPSVGIGQQFITFTNVTMESDKYICVR	3	1	1	AT3G11130.1	Q12(Deamidated); C29(Carbamidomethyl)	3546.79	0.0001	0.00222259
	TANLANNQIINYKCSPNEKWLVLIGIAPGSPERPQLVK	7	1	1	AT3G11130.1	C14(Carbamidomethyl); N17(Deamidated)	4247.27	0.0001	0.000209661
	ESNFYDAEKTKNFLMEAK	2	2	2	AT3G11130.1;AT3G08530.1	M15(Oxidation)	2181.01	0.000153	0.00104294
	RDPTLAVVAYR	24	2	2	AT3G11130.1;AT3G08530.1		1260.71	0.000164	0.00662851
	TANLANNQIINYKCSPNEK	8	2	2	AT3G11130.1;AT3G08530.1	C14(Carbamidomethyl)	2192.08	0.000186	0.000215018
	VTRESNFYDAEK	12	2	2	AT3G11130.1;AT3G08530.1		1458.68	0.000192	0.0036831
	LLTQFLEHLVSEGSQDVHVHNALGK	3	2	2	AT3G11130.1;AT3G08530.1	Q15(Deamidated)	2772.45	0.000209	0.00567413
	HYSELPDIKR	8	2	2	AT3G11130.1;AT3G08530.1		1257.66	0.00023	0.000819733
	RGNLPGAENLVVQRFQELFAQTK	5	2	2	AT3G11130.1;AT3G08530.1	Q16(Deamidated)	2616.41	0.000239	0.00209703
	FQSVPVQAGQTPPLLQYFGTLLTR	16	2	2	AT3G11130.1;AT3G08530.1	Q10(Deamidated)	2662.44	0.000503	0.0305924
	LIKPYMVAVQSNNVSAVNEALNEIYAEEEDYDRLR	10	1	1	AT3G11130.1	N13(Deamidated); N22(Deamidated)	4058	0.000551	0.00271616
	AAANAPIIMK	1	1	1	AT3G11130.1	N-Term(Acetyl)	1041.58	0.000705	0.0108895
	SQALEAHAASFAQFK	4	2	2	AT3G11130.1;AT3G08530.1		1605.8	0.000787	0.0103571
	EYSGKVDELIK	6	2	2	AT3G11130.1;AT3G08530.1	Y2(Phospho)	1360.63	0.000811	0.0456193	48.7616	0.99652	Y(2): 99.7; S(3): 0.3
	LIKPYMVAVQSNNVSAVNEALNEIYAEEEDYDRLR	10	1	1	AT3G11130.1	Q10(Deamidated); N13(Deamidated); N18(Deamidated)	4058.97	0.000967	0.0531739
	LQQFQGAVDAAR	4	2	2	AT3G11130.1;AT3G08530.1		1303.67	0.001443	0.0440547
	ILALKAQVPGTTQDHLQIFNIEAK	3	2	2	AT3G11130.1;AT3G08530.1	Q17(Deamidated)	2649.45	0.002015	0.0576323
	IEKHELVEMRR	1	2	2	AT3G11130.1;AT3G08530.1	M9(Oxidation)	1455.77	0.002715	0.0600817
	DPTLAVVAYRR	24	2	2	AT3G11130.1;AT3G08530.1		1260.71	0.004067	0.0842512
	FQSVPVQAGQTPPLLQYFGTLLTRGKLNSYESLELSR	1	2	2	AT3G11130.1;AT3G08530.1	Q16(Deamidated)	4139.2	0.041076	0.496124
	SQALEAHAASFAQFKVPGNENPSILISFASK	1	2	2	AT3G11130.1;AT3G08530.1	Q2(Deamidated)	3260.66	0.0429	0.486508
	VLEINLVTFPNVADAILANGMFSHYDRPR	1	1	1	AT3G11130.1	M21(Oxidation)	3288.69
AT3G08530.1	Clathrin, heavy chain	37.82	1	7	59	1362
	Sequence	# PSMs	# Proteins	# Protein Groups	Protein Group Accessions	Modifications	MH+ [Da]	q-Value	PEP	pRS Score	pRS Probability	pRS Site Probabilities
	VNPGNAPLVVGQLLDDECPEDFIKGLILSVR	32	2	2	AT3G11130.1;AT3G08530.1	C18(Carbamidomethyl)	3377.78	0	1.46677e-09
	AQVPGTTQDHLQIFNIEAK	20	2	2	AT3G11130.1;AT3G08530.1		2110.08	0	5.41072e-06
	SQALEAHAASFAQFKVPGNENPSILISFASK	76	2	2	AT3G11130.1;AT3G08530.1		3259.67	0	2.90695e-09
	RGNLPGAENLVVQRFQELFAQTK	64	2	2	AT3G11130.1;AT3G08530.1		2615.4	0	2.79546e-08
	GKLNSYESLELSR	44	2	2	AT3G11130.1;AT3G08530.1		1495.77	0	3.53774e-05
	RGQCDEELINVTNKNSLFK	64	2	2	AT3G11130.1;AT3G08530.1	C4(Carbamidomethyl)	2265.12	0	2.05021e-07
	FQSVPVQAGQTPPLLQYFGTLLTR	76	2	2	AT3G11130.1;AT3G08530.1		2661.43	0	8.12614e-06
	QLIDQVVSTALPESK	16	2	2	AT3G11130.1;AT3G08530.1		1627.89	0	6.13866e-06
	DPTLAVVAYR	20	2	2	AT3G11130.1;AT3G08530.1		1104.6	0	1.28573e-05
	RGNLPGAENLVVQR	40	2	2	AT3G11130.1;AT3G08530.1		1522.84	0	1.69892e-05
	ILALKAQVPGTTQDHLQIFNIEAK	68	2	2	AT3G11130.1;AT3G08530.1		2648.48	0	6.72252e-09
	TANLANNQIINYK	24	2	2	AT3G11130.1;AT3G08530.1		1476.78	0	4.61816e-06
	TPDTVAKFQSVPVQAGQTPPLLQYFGTLLTR	28	2	2	AT3G11130.1;AT3G08530.1		3373.8	0	1.46766e-05
	ESIDLHDSFDQIGLAQKIEK	24	2	2	AT3G11130.1;AT3G08530.1		2286.16	0	3.78668e-06
	LHVIELGAQPGKPSFTKK	48	2	2	AT3G11130.1;AT3G08530.1		1950.12	0	1.10899e-05
	GNMQLFSVDQQR	6	2	2	AT3G11130.1;AT3G08530.1	M3(Oxidation)	1438.67	0	2.3433e-06
	EAAELAAESPQGILR	32	2	2	AT3G11130.1;AT3G08530.1		1554.81	0	0.000447666
	ESIDLHDSFDQIGLAQKIEKHELVEMR	8	2	2	AT3G11130.1;AT3G08530.1		3180.6	0	1.04421e-05
	IIIDSNNNPEHFLTTNPYYDSK	20	2	2	AT3G11130.1;AT3G08530.1		2595.23	0	7.18033e-06
	EAAELAAESPQGILRTPDTVAK	36	2	2	AT3G11130.1;AT3G08530.1		2267.19	0	0.000712017
	ESNFYDAEKTKNFLMEAK	16	2	2	AT3G11130.1;AT3G08530.1		2165.01	0	6.9845e-06
	NRLRLLTQFLEHLVSEGSQDVHVHNALGK	8	2	2	AT3G11130.1;AT3G08530.1		3310.78	0	0.000210771
	LLTQFLEHLVSEGSQDVHVHNALGK	60	2	2	AT3G11130.1;AT3G08530.1		2771.44	0	0.00030277
	YKEAAELAAESPQGILRTPDTVAK	16	2	2	AT3G11130.1;AT3G08530.1		2558.36	0	7.26819e-05
	ATPKVVAAFAER	20	2	2	AT3G11130.1;AT3G08530.1		1259.71	0	5.22996e-05
	FQELFAQTKYK	24	2	2	AT3G11130.1;AT3G08530.1		1402.74	0	0.00020582
	LRLLTQFLEHLVSEGSQDVHVHNALGK	16	2	2	AT3G11130.1;AT3G08530.1		3040.63	0	7.7015e-06
	AGLYIQSLKHYSELPDIKR	12	2	2	AT3G11130.1;AT3G08530.1		2231.21	0	1.6219e-06
	GQCDEELINVTNKNSLFK	16	2	2	AT3G11130.1;AT3G08530.1	C3(Carbamidomethyl)	2109.02	0	0.000169158
	RDPTLAVVAYRR	16	2	2	AT3G11130.1;AT3G08530.1		1416.81	0	1.38326e-05
	YIEGYVQKVNPGNAPLVVGQLLDDECPEDFIKGLILSVR	8	2	2	AT3G11130.1;AT3G08530.1	Q20(Deamidated); C26(Carbamidomethyl)	4359.26	0	5.88774e-08
	MLGLVTQNSVYHWSIEGDSEPVKMFDR	4	1	1	AT3G08530.1	N8(Deamidated)	3139.48	0	4.40907e-07
	VNPGNAPLVVGQLLDDECPEDFIKGLILSVR	3	2	2	AT3G11130.1;AT3G08530.1	N2(Deamidated); Q12(Deamidated); C18(Carbamidomethyl)	3379.77	0	0.000593237
	ESIDLHDSFDQIGLAQKIEKHELVEMR	2	2	2	AT3G11130.1;AT3G08530.1	Q16(Deamidated)	3181.59	0	3.55453e-05
	MLGLVTQNSVYHWSIEGDSEPVKMFDR	8	1	1	AT3G08530.1		3138.5	0	7.75099e-09
	FQELFAQTKYKEAAELAAESPQGILR	36	2	2	AT3G11130.1;AT3G08530.1		2938.54	0	2.23161e-05
	GNMQLFSVDQQR	4	2	2	AT3G11130.1;AT3G08530.1		1422.68	0	8.43201e-06
	SHQMPEQVVFWKWITPK	4	1	1	AT3G08530.1		2141.1	0	2.85493e-05
	LHVIELGAQPGKPSFTK	16	2	2	AT3G11130.1;AT3G08530.1		1822.02	0	2.07982e-05
	GQCDEELINVTNKNSLFKLQAR	12	2	2	AT3G11130.1;AT3G08530.1	C3(Carbamidomethyl)	2577.31	0	0.00021675
	YIEGYVQKVNPGNAPLVVGQLLDDECPEDFIKGLILSVR	18	2	2	AT3G11130.1;AT3G08530.1	N13(Deamidated); Q20(Deamidated); C26(Carbamidomethyl)	4360.27	0	3.81702e-05
	VNPGNAPLVVGQLLDDECPEDFIKGLILSVR	6	2	2	AT3G11130.1;AT3G08530.1	Q12(Deamidated); C18(Carbamidomethyl)	3378.78	0	6.64913e-05
	TPDTVAKFQSVPVQAGQTPPLLQYFGTLLTR	24	2	2	AT3G11130.1;AT3G08530.1	Q14(Deamidated); Q17(Deamidated)	3375.79	0	0.000690166
	VPGNENPSILISFASK	16	2	2	AT3G11130.1;AT3G08530.1		1672.89	0	0.000175684
	ESIDLHDSFDQIGLAQKIEKHELVEMR	5	2	2	AT3G11130.1;AT3G08530.1	M26(Oxidation)	3196.6	0	7.10127e-06
	FSFVPDLTHYLYTNNMLR	5	1	1	AT3G08530.1	M16(Oxidation)	2247.09	0	5.30605e-07
	TPDTVAKFQSVPVQAGQTPPLLQYFGTLLTR	4	2	2	AT3G11130.1;AT3G08530.1	Q9(Deamidated)	3374.79	0	0.000340093
	MLGLVTQNSVYHWSIEGDSEPVKMFDR	4	1	1	AT3G08530.1	M1(Oxidation); M24(Oxidation)	3170.48	0	2.63891e-06
	EGLVSDAIESFIR	8	2	2	AT3G11130.1;AT3G08530.1		1435.74	0	3.26859e-08
	NRLRLLTQFLEHLVSEGSQDVHVHNALGK	8	2	2	AT3G11130.1;AT3G08530.1	Q19(Deamidated)	3311.78	0	0.000413924
	FQELFAQTK	24	2	2	AT3G11130.1;AT3G08530.1		1111.58	8.7e-05	0.00108307
	TGQIKEVERVTR	36	2	2	AT3G11130.1;AT3G08530.1		1415.79	8.7e-05	0.000166266
	VTRESNFYDAEKTK	12	2	2	AT3G11130.1;AT3G08530.1		1687.83	8.7e-05	0.000730849
	NLLENWLAEDKLECSEELGDLVK	4	2	2	AT3G11130.1;AT3G08530.1	C14(Carbamidomethyl)	2717.34	8.7e-05	0.00374949
	ESNFYDAEKTKNFLMEAK	2	2	2	AT3G11130.1;AT3G08530.1	M15(Oxidation)	2181.01	0.000153	0.00104294
	RDPTLAVVAYR	24	2	2	AT3G11130.1;AT3G08530.1		1260.71	0.000164	0.00662851
	TANLANNQIINYKCSPNEK	8	2	2	AT3G11130.1;AT3G08530.1	C14(Carbamidomethyl)	2192.08	0.000186	0.000215018
	VTRESNFYDAEK	12	2	2	AT3G11130.1;AT3G08530.1		1458.68	0.000192	0.0036831
	LLTQFLEHLVSEGSQDVHVHNALGK	3	2	2	AT3G11130.1;AT3G08530.1	Q15(Deamidated)	2772.45	0.000209	0.00567413
	HYSELPDIKR	8	2	2	AT3G11130.1;AT3G08530.1		1257.66	0.00023	0.000819733
	RGNLPGAENLVVQRFQELFAQTK	5	2	2	AT3G11130.1;AT3G08530.1	Q16(Deamidated)	2616.41	0.000239	0.00209703
	LIKPYMIAVQSNNVSAVNEALNEIYVEEEDYDRLR	5	1	1	AT3G08530.1	N22(Deamidated)	4099.01	0.000251	0.00170169
	QQLVKGNMQLFSVDQQR	2	1	1	AT3G08530.1	M8(Oxidation)	2035.04	0.000254	0.00181634
	FQSVPVQAGQTPPLLQYFGTLLTR	16	2	2	AT3G11130.1;AT3G08530.1	Q10(Deamidated)	2662.44	0.000503	0.0305924
	SQALEAHAASFAQFK	4	2	2	AT3G11130.1;AT3G08530.1		1605.8	0.000787	0.0103571
	EYSGKVDELIK	6	2	2	AT3G11130.1;AT3G08530.1	Y2(Phospho)	1360.63	0.000811	0.0456193	48.7616	0.99652	Y(2): 99.7; S(3): 0.3
	LQQFQGAVDAAR	4	2	2	AT3G11130.1;AT3G08530.1		1303.67	0.001443	0.0440547
	EVLTLPSIGINQQFITFTNVTMESDKYICVR	6	1	1	AT3G08530.1	N11(Deamidated); N19(Deamidated); C29(Carbamidomethyl)	3618.83	0.002012	0.0430408
	ILALKAQVPGTTQDHLQIFNIEAK	3	2	2	AT3G11130.1;AT3G08530.1	Q17(Deamidated)	2649.45	0.002015	0.0576323
	VLEINLVTFPNVADAVLANGMFTHYDRPR	1	1	1	AT3G08530.1	M21(Oxidation)	3288.69	0.002069	0.045336
	IEKHELVEMRR	1	2	2	AT3G11130.1;AT3G08530.1	M9(Oxidation)	1455.77	0.002715	0.0600817
	DPTLAVVAYRR	24	2	2	AT3G11130.1;AT3G08530.1		1260.71	0.004067	0.0842512
	FQSVPVQAGQTPPLLQYFGTLLTRGKLNSYESLELSR	1	2	2	AT3G11130.1;AT3G08530.1	Q16(Deamidated)	4139.2	0.041076	0.496124
	SQALEAHAASFAQFKVPGNENPSILISFASK	1	2	2	AT3G11130.1;AT3G08530.1	Q2(Deamidated)	3260.66	0.0429	0.486508
	QQLVKGNMQLFSVDQQRSQALEAHAASFAQFK	4	1	1	AT3G08530.1		3605.81	0.105263	0.804423
	IAQLCEKAGLYIQSLKHYSELPDIK	1	1	1	AT3G08530.1	C5(Carbamidomethyl); Y11(Phospho); Y18(Phospho); S19(Phospho)	3157.47	0.733024	1	1.06076e-14	0.25	Y(11): 75.0; S(14): 75.0; Y(18): 75.0; S(19): 75.0
ATMG00285.1	NADH dehydrogenase 2A	2.2	1	1	1	2
	Sequence	# PSMs	# Proteins	# Protein Groups	Protein Group Accessions	Modifications	MH+ [Da]	q-Value	PEP	pRS Score	pRS Probability	pRS Site Probabilities
	KSEFSTEAGSK	2	1	1	ATMG00285.1	T6(Phospho)	1250.52	0.001809	0.0963515	65.9291	0.909794	S(2): 0.0; S(5): 9.0; T(6): 91.0; S(10): 0.0
AT5G19940.1	Plastid-lipid associated protein PAP / fibrillin family protein	30.13	2	6	6	59
	Sequence	# PSMs	# Proteins	# Protein Groups	Protein Group Accessions	Modifications	MH+ [Da]	q-Value	PEP	pRS Score	pRS Probability	pRS Site Probabilities
	TGPDDLISTLLSKVANSDGGVTLSPEQHKEVAQVAGELQK	6	2	1	AT5G19940.1	N16(Deamidated); Q33(Deamidated)	4134.13	0	1.33004e-05
	TGPDDLISTLLSK	20	2	1	AT5G19940.1		1359.73	0	2.73735e-07
	TGPDDLISTLLSKVANSDGGVTLSPEQHK	12	2	1	AT5G19940.1		2979.52	0	8.08836e-05
	EVAQVAGELQK	16	2	1	AT5G19940.1		1171.63	8.7e-05	0.00253239
	AATASSLTIASSFSEPRTQIHSSRR	1	2	1	AT5G19940.1	T8(Phospho); S11(Phospho)	2821.3	0.00203	0.108191	12.8888	0.0669592	T(3): 13.1; S(5): 23.4; S(6): 40.6; T(8): 40.6; S(11): 24.9; S(12): 18.9; S(14): 13.6; T(18): 13.6; S(22): 5.7; S(23): 5.7
	GSLFVFR	4	1	1	AT5G19940.1		825.464	0.005647	0.112893
AT5G63000.1	Mitochondrial import inner membrane translocase subunit Tim17/Tim22/Tim23 family protein	19.9	1	1	1	3
	Sequence	# PSMs	# Proteins	# Protein Groups	Protein Group Accessions	Modifications	MH+ [Da]	q-Value	PEP	pRS Score	pRS Probability	pRS Site Probabilities
	LAGNPNWGTATVVGVFAGLLYGGSKEASASVSKDAEVMLK	3	1	1	AT5G63000.1	T9(Phospho)	4075.01	0.002108	0.016786	9.78802	0.443765	T(9): 44.4; T(11): 19.4; Y(21): 10.2; S(24): 6.5; S(28): 6.5; S(30): 6.5; S(32): 6.5
AT1G20620.1	catalase 3	90.65	4	41	53	1570
	Sequence	# PSMs	# Proteins	# Protein Groups	Protein Group Accessions	Modifications	MH+ [Da]	q-Value	PEP	pRS Score	pRS Probability	pRS Site Probabilities
	GFFEVTHDISNLTCADFLR	64	5	2	AT4G35090.1;AT1G20620.1	C14(Carbamidomethyl)	2242.05	0	1.50874e-05
	YRPSSAYNAPFYTTNGGAPVSNNISSLTIGER	44	3	1	AT1G20620.1		3404.66	0	3.65186e-11
	GIWISYWSQADR	8	2	1	AT1G20620.1		1481.72	0	4.29548e-07
	VPTPTNSYTGIR	28	4	1	AT1G20620.1		1305.68	0	5.17742e-05
	CAEKVPTPTNSYTGIRTK	32	4	1	AT1G20620.1	C1(Carbamidomethyl)	2023.02	0	2.18961e-08
	EGNFDLVGNNTPVFFIR	80	4	1	AT1G20620.1		1938.97	0	8.80231e-07
	GPVLLEDYHLIEK	60	3	1	AT1G20620.1		1525.82	0	1.19524e-07
	GFFEVTHDISNLTCADFLRAPGVQTPVIVR	64	5	2	AT4G35090.1;AT1G20620.1	C14(Carbamidomethyl)	3359.72	0	1.94519e-08
	LGPNYLQLPVNAPK	24	7	3	AT1G20630.1;AT4G35090.1;AT1G20620.1		1523.86	0	5.23893e-07
	APGVQTPVIVR	16	5	2	AT4G35090.1;AT1G20620.1		1136.68	0	0.00129951
	DLHDAIASGNYPEWK	12	4	1	AT1G20620.1		1715.8	0	7.41466e-07
	HRLGPNYLQLPVNAPK	60	7	3	AT1G20630.1;AT4G35090.1;AT1G20620.1		1817.02	0	6.52278e-07
	LFIQTMDPADEDK	6	4	1	AT1G20620.1	M6(Oxidation)	1538.7	0	1.53838e-07
	DEEINYYPSKFDPVR	64	4	1	AT1G20620.1		1871.88	0	0.00210508
	VPTPTNSYTGIRTK	36	4	1	AT1G20620.1		1534.82	0	8.70897e-06
	WVEILSEPR	24	3	1	AT1G20620.1		1128.6	0	8.79149e-05
	CAEKVPTPTNSYTGIR	76	4	1	AT1G20620.1	C1(Carbamidomethyl)	1793.88	0	0.000762509
	CAHHNNHHEGFMNFMHR	32	6	2	AT4G35090.1;AT1G20620.1	C1(Carbamidomethyl)	2175.89	0	8.12158e-06
	GPVLLEDYHLIEKVANFTR	64	3	1	AT1G20620.1		2214.19	0	2.81388e-06
	LFIQTMDPADEDK	8	4	1	AT1G20620.1		1522.71	0	5.1478e-06
	LFIQTMDPADEDKFDFDPLDVTK	16	4	1	AT1G20620.1		2700.27	0	1.77184e-05
	LASRLNVRPSI	24	4	2	AT4G35090.1;AT1G20620.1		1225.74	0	0.00123107
	APGVQTPVIVRFSTVVHER	8	3	1	AT1G20620.1		2092.16	0	0.000577401
	CAHHNNHHEGFMNFMHR	20	6	2	AT4G35090.1;AT1G20620.1	C1(Carbamidomethyl); M15(Oxidation)	2191.88	0	2.62958e-06
	LTHEIRGIWISYWSQADR	20	2	1	AT1G20620.1		2231.13	0	3.055e-05
	DEEINYYPSKFDPVRCAEK	48	4	1	AT1G20620.1	C16(Carbamidomethyl)	2360.09	0	0.000147148
	SGKVLFVKFHWKPTCGIK	36	4	1	AT1G20620.1	C15(Carbamidomethyl)	2132.18	0	2.02589e-08
	GISAKGFFEVTHDISNLTCADFLRAPGVQTPVIVR	64	3	1	AT1G20620.1	C19(Carbamidomethyl)	3815.98	0	1.92646e-08
	CAHHNNHHEGFMNFMHR	33	6	2	AT4G35090.1;AT1G20620.1	C1(Carbamidomethyl); M12(Oxidation); M15(Oxidation)	2207.88	0	4.18657e-05
	ERIPERVVHAR	36	6	3	AT1G20630.1;AT4G35090.1;AT1G20620.1		1361.77	0	0.000188935
	LFIQTMDPADEDKFDFDPLDVTKIWPEDILPLQPVGR	8	4	1	AT1G20620.1		4314.16	0	3.13359e-06
	FDFDPLDVTKIWPEDILPLQPVGR	8	5	2	AT1G20630.1;AT1G20620.1		2810.49	0	1.24376e-05
	GISAKGFFEVTHDISNLTCADFLR	24	3	1	AT1G20620.1	C19(Carbamidomethyl)	2698.33	0	7.63415e-05
	VVGGANHSHATKDLHDAIASGNYPEWK	12	4	1	AT1G20620.1		2874.39	0	0.000114074
	MDPYKYRPSSAYNAPFYTTNGGAPVSNNISSLTIGER	11	3	1	AT1G20620.1	N-Term(Acetyl)	4080.92	0	1.10052e-05
	TIDNFFNETEQLAFNPGLVVPGIYYSDDKLLQCR	15	4	1	AT1G20620.1	N15(Deamidated); C33(Carbamidomethyl)	3977.9	0	9.18216e-07
	CAHHNNHHEGFMNFMHR	12	6	2	AT4G35090.1;AT1G20620.1	C1(Carbamidomethyl); N5(Deamidated)	2176.88	0	6.11984e-05
	EGNFDLVGNNTPVFFIRDGIQFPDVVHALKPNPK	19	4	1	AT1G20620.1	Q21(Deamidated)	3795.95	0	0.000162135
	LFIQTMDPADEDKFDFDPLDVTKIWPEDILPLQPVGR	2	4	1	AT1G20620.1	M6(Oxidation)	4330.15	0	5.64155e-06
	FDFDPLDVTKIWPEDILPLQPVGRLVLNR	4	4	1	AT1G20620.1		3405.86	0	0.000154616
	CAEKVPTPTNSYTGIRTK	2	4	1	AT1G20620.1	C1(Carbamidomethyl); N10(Deamidated)	2024.01	0	0.00130342
	GFFEVTHDISNLTCADFLRAPGVQTPVIVR	4	5	2	AT4G35090.1;AT1G20620.1	C14(Carbamidomethyl); Q24(Deamidated)	3360.71	0	2.17219e-07
	GISAKGFFEVTHDISNLTCADFLRAPGVQTPVIVR	4	3	1	AT1G20620.1	C19(Carbamidomethyl); Q29(Deamidated)	3816.98	0	1.24729e-05
	GFFEVTHDISNLTCADFLR	1	5	2	AT4G35090.1;AT1G20620.1	N11(Deamidated); C14(Carbamidomethyl)	2243.06	0	0.00101186
	HMEGFGVHTYTLIAK	2	4	1	AT1G20620.1	M2(Oxidation)	1719.85	0	0.000228111
	EGNFDLVGNNTPVFFIRDGIQFPDVVHALKPNPK	8	4	1	AT1G20620.1		3794.99	0	0.000340313
	FYTREGNFDLVGNNTPVFFIR	4	4	1	AT1G20620.1		2506.25	0	0.000618888
	YRPSSAYNAPFYTTNGGAPVSNNISSLTIGER	4	3	1	AT1G20620.1	N8(Deamidated)	3405.65	0	3.25187e-08
	GFFEVTHDISNLTCADFLRAPGVQTPVIVR	1	5	2	AT4G35090.1;AT1G20620.1	N11(Deamidated); C14(Carbamidomethyl); Q24(Deamidated)	3361.71	0	5.39807e-05
	GISAKGFFEVTHDISNLTCADFLRAPGVQTPVIVR	1	3	1	AT1G20620.1	N16(Deamidated); C19(Carbamidomethyl); Q29(Deamidated)	3817.98	0	2.28775e-07
	FVKRWVEILSEPR	36	3	1	AT1G20620.1		1658.94	8.7e-05	0.00175108
	CVIKKENNFK	24	3	1	AT1G20620.1	C1(Carbamidomethyl)	1279.68	8.7e-05	0.000764672
	ENNFKQAGDRYR	44	3	1	AT1G20620.1		1497.72	8.7e-05	0.000978418
	IFAYGDTQR	12	4	1	AT1G20620.1		1070.53	8.7e-05	0.00160053
	TNIQEYWR	4	4	1	AT1G20620.1		1109.54	8.7e-05	0.00185437
	GFFEVTHDISNLTCADFLRAPGVQTPVIVRFSTVVHER	1	3	1	AT1G20620.1	N11(Deamidated); C14(Carbamidomethyl); Q24(Deamidated)	4317.2	0.0001	0.000214163
	GFFEVTHDISNLTCADFLRAPGVQTPVIVRFSTVVHER	2	3	1	AT1G20620.1	C14(Carbamidomethyl); Q24(Deamidated)	4316.19	0.0001	0.000212223
	FDFDPLDVTKIWPEDILPLQPVGRLVLNR	2	4	1	AT1G20620.1	Q20(Deamidated)	3406.85	0.0001	0.00177224
	FSTVVHER	20	3	1	AT1G20620.1		974.504	0.000113	0.000398104
	DGIQFPDVVHALKPNPK	48	4	1	AT1G20620.1		1875.01	0.000113	0.00039823
	DIRGFAVKFYTR	32	4	1	AT1G20620.1		1472.8	0.000146	0.00322594
	IFAYGDTQRHRLGPNYLQLPVNAPK	24	4	1	AT1G20620.1		2868.52	0.000164	0.00796286
	LFIQTMDPADEDKFDFDPLDVTKIWPEDILPLQPVGR	4	4	1	AT1G20620.1	Q33(Deamidated)	4315.17	0.000196	0.00597978
	SLGQKLASRLNVRPSI	8	3	2	AT4G35090.1;AT1G20620.1		1739.02	0.000355	0.0163384
	FHWKPTCGIK	8	5	2	AT1G20630.1;AT1G20620.1	C7(Carbamidomethyl)	1273.65	0.00043	0.00544792
	LFIQTMDPADEDK	1	4	1	AT1G20620.1	Q4(Deamidated)	1523.69	0.000481	0.00238875
	EGNFDLVGNNTPVFFIR	3	4	1	AT1G20620.1	N9(Deamidated)	1939.95	0.000564	0.0211002
	FSTVVHERASPETMR	1	3	1	AT1G20620.1	M14(Oxidation)	1762.85	0.000581	0.00543939
	SGKVLFVK	4	4	1	AT1G20620.1		877.55	0.000701	0.0147012
	EGNFDLVGNNTPVFFIR	3	4	1	AT1G20620.1	N3(Deamidated); N9(Deamidated)	1940.95	0.000896	0.0123139
	LFIQTMDPADEDKFDFDPLDVTK	1	4	1	AT1G20620.1	Q4(Deamidated)	2701.28	0.000985	0.0131232
	MDPYKYRPSSAYNAPFYTTNGGAPVSNNISSLTIGER	14	3	1	AT1G20620.1	S10(Phospho)	4118.9	0.002241	0.0487397	46.8473	0.155937	Y(4): 2.0; Y(6): 2.0; S(9): 15.6; S(10): 15.6; Y(12): 15.6; Y(17): 15.6; T(18): 15.6; T(19): 15.6; S(26): 2.0; S(30): 0.3; S(31): 0.1; T(33): 0.0
	CAEKVPTPTNSYTGIR	4	4	1	AT1G20620.1	C1(Carbamidomethyl); N10(Deamidated)	1794.87	0.002323	0.0803426
	GIWISYWSQADRSLGQK	4	2	1	AT1G20620.1		1995	0.002427	0.0713692
	ENNFKQAGDRYR	3	3	1	AT1G20620.1	N2(Deamidated)	1498.7	0.004003	0.099128
	EGNFDLVGNNTPVFFIRDGIQFPDVVHALKPNPK	2	4	1	AT1G20620.1	N3(Deamidated); N32(Deamidated)	3796.96	0.075905	0.663733
	DIRGFAVK	8	4	1	AT1G20620.1		905.521	0.11049	0.949849
AT4G15545.1	unknown protein; BEST Arabidopsis thaliana protein match is: unknown protein (TAIR:AT1G16520.1); Has 30201 Blast hits to 17322 proteins in 780 species: Archae - 12; Bacteria - 1396; Metazoa - 17338; Fungi - 3422; Plants - 5037; Viruses - 0; Other Eukaryotes - 2996 (source: NCBI BLink).	67.66	1	18	20	505
	Sequence	# PSMs	# Proteins	# Protein Groups	Protein Group Accessions	Modifications	MH+ [Da]	q-Value	PEP	pRS Score	pRS Probability	pRS Site Probabilities
	LSYEQFGAFLGNVK	24	1	1	AT4G15545.1		1572.8	0	3.4191e-06
	SFDLPDELLQVLPSDPFEQLDVARK	32	1	1	AT4G15545.1		2871.47	0	5.90651e-07
	SRLSYEQFGAFLGNVK	36	1	1	AT4G15545.1		1815.94	0	1.48934e-07
	ENLIRENASLSNTVKR	20	1	1	AT4G15545.1		1844	0	0.000650436
	TRVDGKEFFR	28	1	1	AT4G15545.1		1254.66	0	0.000255269
	SFDLPDELLQVLPSDPFEQLDVAR	84	1	1	AT4G15545.1		2743.38	0	0.000836269
	KAEEIFGGDNRDLYVIFEGLITR	32	1	1	AT4G15545.1		2655.37	0	3.08408e-06
	GMFDDTRSSISISEPGSQTAR	12	1	1	AT4G15545.1		2242.04	0	7.00061e-05
	AEEIFGGDNRDLYVIFEGLITR	28	1	1	AT4G15545.1		2527.28	0	0.00233344
	SFDLPDELLQVLPSDPFEQLDVARKITSIALSTR	40	1	1	AT4G15545.1		3814.02	0	9.57674e-06
	SEIEEEEEEGSASAITGSR	9	1	1	AT4G15545.1	N-Term(Acetyl)	2051.89	0	1.62312e-12
	SFDLPDELLQVLPSDPFEQLDVARK	6	1	1	AT4G15545.1	Q10(Deamidated)	2872.47	0	0.000106453
	SFDLPDELLQVLPSDPFEQLDVARKITSIALSTR	15	1	1	AT4G15545.1	Q19(Deamidated)	3815.02	0	0.000192061
	SFDLPDELLQVLPSDPFEQLDVARKITSIALSTR	4	1	1	AT4G15545.1	Q10(Deamidated); Q19(Deamidated)	3816.01	0	1.5882e-05
	KITSIALSTR	16	1	1	AT4G15545.1		1089.66	0	8.81571e-05
	AEEIFGGDNRDLYVIFEGLITRNAH	28	1	1	AT4G15545.1		2849.42	0	9.87154e-05
	GMFDDTRSSISISEPGSQTAR	3	1	1	AT4G15545.1	M2(Oxidation)	2258.03	0	7.86989e-05
	AEEIFGGDNRDLYVIFEGLITRNAH	4	1	1	AT4G15545.1	N9(Deamidated)	2850.4	0	0.000765123
	SSISISEPGSQTAR	24	1	1	AT4G15545.1		1419.71	8.7e-05	0.00214564
	AEEIFGGDNRDLYVIFEGLITR	1	1	1	AT4G15545.1	N9(Deamidated)	2528.28	0.000209	0.00380434
	RHSVSFATTR	24	1	1	AT4G15545.1		1161.61	0.00026	0.000753374
	ENASLSNTVKRLQR	4	1	1	AT4G15545.1		1615.88	0.000467	0.00374375
	SFDLPDELLQVLPSDPFEQLDVAR	5	1	1	AT4G15545.1	Q10(Deamidated)	2744.36	0.001327	0.0204855
	LTPPGSPPILSASGTPK	15	1	1	AT4G15545.1	S6(Phospho)	1699.86	0.002479	0.12152	38.3198	0.960638	T(2): 1.0; S(6): 96.1; S(11): 1.0; S(13): 1.0; T(15): 1.0
	SEIEEEEEEGSASAITGSR	1	1	1	AT4G15545.1	S1(Phospho)	2089.83	0.0036	0.160218	41.942	0.982971	S(1): 98.3; S(11): 1.3; S(13): 0.4; T(16): 0.0; S(18): 0.0
	DVSKLEGFRK	4	1	1	AT4G15545.1		1178.65	0.018687	0.37315
	HSSIQSQQASEAIEPAATDNENDAPKPSLSASLPLVSQTTTPR	2	1	1	AT4G15545.1	S2(Phospho); S3(Phospho)	4634.14	0.505226	1	0.196114	0.0147469	S(2): 15.8; S(3): 15.8; S(6): 16.3; S(10): 17.0; T(18): 18.1; S(28): 18.1; S(30): 17.1; S(32): 16.4; S(37): 16.3; T(39): 16.3; T(40): 16.3; T(41): 16.3
	VDGKEFFRQVR	4	1	1	AT4G15545.1		1380.74
AT5G45510.2	Leucine-rich repeat (LRR) family protein	2.31	2	1	1	3
	Sequence	# PSMs	# Proteins	# Protein Groups	Protein Group Accessions	Modifications	MH+ [Da]	q-Value	PEP	pRS Score	pRS Probability	pRS Site Probabilities
	SGEHAEGEANDSQSGEKKEDTDGEDEIR	3	2	1	AT5G45510.2	T21(Phospho)	3099.22	0.002641	0.124374	45.2742	0.814103	S(1): 0.0; S(12): 3.2; S(14): 15.3; T(21): 81.4
AT5G09600.2	succinate dehydrogenase 3-1	16.67	1	1	1	4
	Sequence	# PSMs	# Proteins	# Protein Groups	Protein Group Accessions	Modifications	MH+ [Da]	q-Value	PEP	pRS Score	pRS Probability	pRS Site Probabilities
	TMQVSPELSGRSKPVVNDILGTGLGTNNAIR	4	1	1	AT5G09600.2	S12(Phospho)	3304.69	0.002651	0.0559782	11.4506	0.317621	T(1): 9.1; S(5): 9.1; S(9): 31.8; S(12): 31.8; T(22): 9.1; T(26): 9.1
AT3G45190.1	SIT4 phosphatase-associated family protein	25.35	1	11	12	171
	Sequence	# PSMs	# Proteins	# Protein Groups	Protein Group Accessions	Modifications	MH+ [Da]	q-Value	PEP	pRS Score	pRS Probability	pRS Site Probabilities
	AMDQALKEGIVGEAGPMKR	12	1	1	AT3G45190.1		2001.02	0	1.18303e-08
	SPPVPSLFGKDVEFVGVEPEGTER	28	1	1	AT3G45190.1		2572.3	0	7.53167e-05
	MPDVRIPNGSSSSEGEISPR	8	1	1	AT3G45190.1		2115.01	0	1.10147e-07
	AMDQALKEGIVGEAGPMKR	3	1	1	AT3G45190.1	M2(Oxidation)	2017.02	0	3.91788e-06
	DVEFVGVEPEGTER	16	1	1	AT3G45190.1		1562.73	0	0.000774762
	NDSSSAIAPGSTDDVKMPDVRIPNGSSSSEGEISPR	12	1	1	AT3G45190.1		3659.69	0	4.40907e-05
	ISNKLVQLSTNSNQIK	36	1	1	AT3G45190.1		1787	0	3.26802e-05
	TLLEENNDWGEWEANTLHDR	8	1	1	AT3G45190.1		2442.09	0	5.29513e-06
	NTTTASPGKESPDDSMQEYNDTNYWKVDQEVTVVE	5	1	1	AT3G45190.1	Q17(Deamidated)	3978.74	0	5.06945e-05
	AMDQALKEGIVGEAGPMKR	7	1	1	AT3G45190.1	M2(Oxidation); M17(Oxidation)	2033.01	0	2.58036e-09
	TEKQPILSGDKQPTLAAAGK	12	1	1	AT3G45190.1		2053.13	0	3.66386e-05
	EGIVGEAGPMKR	12	1	1	AT3G45190.1		1243.64	8.7e-05	0.00431149
	SPPVPSLFGKDVEFVGVEPEGTERAMDQALK	1	1	1	AT3G45190.1	M26(Oxidation)	3345.67	0.000146	0.00328055
	EGIVGEAGPMKR	6	1	1	AT3G45190.1	M10(Oxidation)	1259.64	0.000846	0.0167315
	SPPVPSLFGKDVEFVGVEPEGTER	4	1	1	AT3G45190.1	S1(Phospho)	2652.25	0.002772	0.0991954	67.6899	0.903487	S(1): 90.3; S(6): 9.7; T(22): 0.0
	IFGHAFEDPQSKSSLVHTLSVCISLLSPRR	1	1	1	AT3G45190.1	C22(Carbamidomethyl); S24(Phospho); S27(Phospho)	3541.68	0.339596	1	6.24236	0.0926337	S(11): 20.3; S(13): 20.3; S(14): 20.3; T(18): 33.0; S(20): 28.8; S(24): 38.7; S(27): 38.7
AT1G76850.1	exocyst complex component sec5	15.5	1	9	10	121
	Sequence	# PSMs	# Proteins	# Protein Groups	Protein Group Accessions	Modifications	MH+ [Da]	q-Value	PEP	pRS Score	pRS Probability	pRS Site Probabilities
	KPVANLVQQPR	32	1	1	AT1G76850.1		1249.74	0	0.000743653
	DLTYQKPPSSSARKPVANLVQQPR	40	1	1	AT1G76850.1		2680.45	0	6.49806e-05
	IHQDTTAADLEAGALGLKSDLKGR	12	1	1	AT1G76850.1		2480.31	8.7e-05	0.00175061
	TRVNTACFAESAPLESTPPLPK	12	1	1	AT1G76850.1	C7(Carbamidomethyl)	2386.21	0.000153	0.000634774
	TRVNTACFAESAPLESTPPLPK	1	1	1	AT1G76850.1	N4(Deamidated); C7(Carbamidomethyl)	2387.2	0.000209	0.00290599
	ANLAFEPLFER	4	1	1	AT1G76850.1		1306.68	0.000254	0.00193251
	LVYFSDHFDPKLFLSR	4	1	1	AT1G76850.1		1984.03	0.000503	0.0346388
	LITESSGSPSKAEKVDNTLR	2	1	1	AT1G76850.1	S8(Phospho)	2212.08	0.003302	0.0739667	27.3094	0.707987	T(3): 1.6; S(5): 4.9; S(6): 4.9; S(8): 70.8; S(10): 17.2; T(18): 0.6
	ESRTAPVVQKVEGK	4	1	1	AT1G76850.1		1527.84	0.00471	0.10525
	EIGGSSGGAGRGRGSDVR	8	1	1	AT1G76850.1		1674.82	0.008639	0.210056
	SSQVTDTSANKAEEKVTEAR	2	1	1	AT1G76850.1	T7(Phospho); T17(Phospho)	2310.99			29.1084	0.651606	S(1): 3.5; S(2): 3.5; T(5): 14.4; T(7): 77.1; S(8): 17.7; T(17): 84.0
AT1G16630.1	unknown protein; LOCATED IN: chloroplast; BEST Arabidopsis thaliana protein match is: unknown protein (TAIR:AT2G16270.1); Has 10587 Blast hits to 5736 proteins in 617 species: Archae - 88; Bacteria - 963; Metazoa - 3686; Fungi - 820; Plants - 541; Viruses - 438; Other Eukaryotes - 4051 (source: NCBI BLink).	4.5	1	1	2	11
	Sequence	# PSMs	# Proteins	# Protein Groups	Protein Group Accessions	Modifications	MH+ [Da]	q-Value	PEP	pRS Score	pRS Probability	pRS Site Probabilities
	SNDSGESMASSASEYSIGSVSYGSFTTYEK	8	1	1	AT1G16630.1	S1(Phospho); S4(Phospho); S7(Phospho); S10(Phospho); S11(Phospho); S13(Phospho); S16(Phospho); T26(Phospho); T27(Phospho); Y28(Phospho)	3927.98	0.00369	0.0882766			Too many isoforms
	DQIANVVK	3	1	1	AT1G16630.1	Q2(Deamidated); N5(Deamidated)	888.468
AT3G18780.2	actin 2	85.94	2	2	41	925
	Sequence	# PSMs	# Proteins	# Protein Groups	Protein Group Accessions	Modifications	MH+ [Da]	q-Value	PEP	pRS Score	pRS Probability	pRS Site Probabilities
	DLYGNIVLSGGTTMFSGIADR	24	3	2	AT3G18780.2;AT1G49240.1		2187.07	0	2.37558e-09
	CDVDIRKDLYGNIVLSGGTTMFSGIADR	12	3	2	AT3G18780.2;AT1G49240.1	C1(Carbamidomethyl)	3073.51	0	2.36152e-08
	NYELPDGQVITIGAER	52	4	3	AT3G18780.2;AT5G09810.1;AT1G49240.1		1774.89	0	7.42647e-10
	DLYGNIVLSGGTTMFSGIADR	13	3	2	AT3G18780.2;AT1G49240.1	M14(Oxidation)	2203.07	0	3.93119e-09
	LSFVAVDYEQEMETSK	12	3	2	AT3G18780.2;AT1G49240.1		1875.86	0	2.27746e-07
	TSSSIEKNYELPDGQVITIGAER	56	3	2	AT3G18780.2;AT1G49240.1		2507.25	0	1.05742e-07
	MSKEITALAPSSMK	20	8	4	AT5G09810.1;AT2G37620.1;AT3G18780.2;AT1G49240.1		1493.77	0	4.94304e-08
	FRCPEVLFQPSFVGMEAAGIHETTYNSIMK	16	3	2	AT3G18780.2;AT1G49240.1	C3(Carbamidomethyl)	3459.64	0	3.59858e-09
	RGILTLKYPIEHGVVSNWDDMEK	20	3	2	AT3G18780.2;AT1G49240.1		2700.38	0	3.84717e-10
	IAPEEHPVLLTEAPLNPK	104	3	2	AT3G18780.2;AT1G49240.1		1968.08	0	2.50724e-07
	AGFAGDDAPR	20	9	4	AT5G09810.1;AT2G37620.1;AT3G18780.2;AT1G49240.1		976.447	0	1.37491e-05
	CPEVLFQPSFVGMEAAGIHETTYNSIMK	4	3	2	AT3G18780.2;AT1G49240.1	C1(Carbamidomethyl)	3156.47	0	1.51917e-07
	MSKEITALAPSSMK	7	8	4	AT5G09810.1;AT2G37620.1;AT3G18780.2;AT1G49240.1	M1(Oxidation)	1509.76	0	1.26521e-05
	DAYVGDEAQSK	16	8	4	AT5G09810.1;AT2G37620.1;AT3G18780.2;AT1G49240.1		1182.53	0	0.000693526
	IAPEEHPVLLTEAPLNPKANR	52	3	2	AT3G18780.2;AT1G49240.1		2309.26	0	0.000124198
	IWHHTFYNELR	44	9	4	AT5G09810.1;AT2G37620.1;AT3G18780.2;AT1G49240.1		1515.75	0	2.52186e-05
	HHGVMVGMNQK	11	3	2	AT3G18780.2;AT1G49240.1	M5(Oxidation)	1253.59	0	8.6835e-10
	HHGVMVGMNQK	20	3	2	AT3G18780.2;AT1G49240.1		1237.59	0	2.36833e-05
	TTGIVLDSGDGVSHTVPIYEGFSLPHAILR	20	3	2	AT3G18780.2;AT1G49240.1		3151.63	0	2.49399e-06
	FRCPEVLFQPSFVGMEAAGIHETTYNSIMK	6	3	2	AT3G18780.2;AT1G49240.1	C3(Carbamidomethyl); M29(Oxidation)	3475.64	0	6.83167e-05
	DAYVGDEAQSKR	20	8	4	AT5G09810.1;AT2G37620.1;AT3G18780.2;AT1G49240.1		1338.63	0	7.03191e-06
	DIKEKLSFVAVDYEQEMETSK	4	3	2	AT3G18780.2;AT1G49240.1		2489.21	0	6.31332e-05
	RGILTLKYPIEHGVVSNWDDMEK	8	3	2	AT3G18780.2;AT1G49240.1	M21(Oxidation)	2716.38	0	2.18984e-07
	YPIEHGVVSNWDDMEK	12	4	2	AT3G18780.2;AT1G49240.1		1918.86	0	2.65787e-07
	LDLAGRDLTDYLMKILTER	4	4	2	AT3G18780.2;AT1G49240.1		2236.19	0	0.000123825
	MSKEITALAPSSMKIK	16	8	4	AT5G09810.1;AT2G37620.1;AT3G18780.2;AT1G49240.1		1734.95	0	2.74479e-07
	GILTLKYPIEHGVVSNWDDMEKIWHHTFYNELR	8	3	2	AT3G18780.2;AT1G49240.1		4041	0	1.00367e-07
	AEADDIQPIVCDNGTGMVK	5	2	1	AT3G18780.2	N-Term(Acetyl); C11(Carbamidomethyl)	2074.94	0	5.13839e-08
	AEADDIQPIVCDNGTGMVKAGFAGDDAPR	13	2	1	AT3G18780.2	N-Term(Acetyl); C11(Carbamidomethyl)	3032.37	0	3.57125e-05
	CDVDIRKDLYGNIVLSGGTTMFSGIADR	1	3	2	AT3G18780.2;AT1G49240.1	C1(Carbamidomethyl); N12(Deamidated)	3074.49	0	1.18314e-06
	FRCPEVLFQPSFVGMEAAGIHETTYNSIMK	1	3	2	AT3G18780.2;AT1G49240.1	C3(Carbamidomethyl); Q9(Deamidated); N26(Deamidated)	3461.63	0	2.85452e-05
	GILTLKYPIEHGVVSNWDDMEK	12	3	2	AT3G18780.2;AT1G49240.1		2544.28	0	2.21094e-08
	YPIEHGVVSNWDDMEKIWHHTFYNELR	12	4	2	AT3G18780.2;AT1G49240.1		3415.59	0	1.5478e-10
	YPIEHGVVSNWDDMEKIWHHTFYNELR	2	4	2	AT3G18780.2;AT1G49240.1	M14(Oxidation)	3431.58	0	2.36785e-05
	MSKEITALAPSSMK	9	8	4	AT5G09810.1;AT2G37620.1;AT3G18780.2;AT1G49240.1	M1(Oxidation); M13(Oxidation)	1525.76	0	1.33244e-07
	DIKEKLSFVAVDYEQEMETSK	1	3	2	AT3G18780.2;AT1G49240.1	Q15(Deamidated)	2490.21	0	2.13521e-05
	FRCPEVLFQPSFVGMEAAGIHETTYNSIMK	8	3	2	AT3G18780.2;AT1G49240.1	C3(Carbamidomethyl); M15(Oxidation); M29(Oxidation)	3491.64	0	2.67954e-06
	CDVDIRKDLYGNIVLSGGTTMFSGIADR	5	3	2	AT3G18780.2;AT1G49240.1	C1(Carbamidomethyl); M21(Oxidation)	3089.5	0	2.13353e-05
	AVFPSVVGRPRHHGVMVGMNQK	2	3	2	AT3G18780.2;AT1G49240.1	M16(Oxidation); M19(Oxidation)	2435.25	0	1.91321e-05
[truncated: 457 more rows]
